# Supplementary material for: Determinants of trafficking, conduction, and disease within a K+ channel revealed through multiparametric deep mutational scanning
Source: eLife journal article supplement (doi:10.7554/elife.76903), 2022-05-31
Supplement: data1 [file elife-76903-data1-v2.zip]

Table 1: Figure 7-figure supplement 1

|     | LOS | LOF |
|-----|-----|-----|
| LOS | 36  | 20  |
| LOF | 15  | 39  |
