# Supplementary material for: Determinants of trafficking, conduction, and disease within a K+ channel revealed through multiparametric deep mutational scanning
Source: eLife journal article supplement (doi:10.7554/elife.76903), 2022-05-31
Supplement: data1 [file elife-76903-data1-v2.zip]

Table 1: Figure 4-figure supplement 3

|              | count1.neg (N = 7168) | count2.neg (N = 7168) | count1.low |
|--------------|-----------------------|-----------------------|------------|
| median       | 178.000               | 165.0000              |            |
| mean         | 281.561               | 297.1245              |            |
| >30-fold [%] | 79.200                | 79.3000               |            |
