# Supplementary material for: Determinants of trafficking, conduction, and disease within a K+ channel revealed through multiparametric deep mutational scanning
Source: eLife journal article supplement (doi:10.7554/elife.76903), 2022-05-31
Supplement: data1 [file elife-76903-data1-v2.zip]

Table 1: Figure 2-figure supplement 4

|              | count1.neg (N = 7282) | count2.neg (N = 7282) | count1.low |
|--------------|-----------------------|-----------------------|------------|
| median       | 103.0000              | 174.0000              |            |
| mean         | 342.3466              | 344.6385              |            |
| >30-fold [%] | 71.5000               | 82.2000               |            |
