# Supplementary material for: Determinants of trafficking, conduction, and disease within a K+ channel revealed through multiparametric deep mutational scanning
Source: eLife journal article supplement (doi:10.7554/elife.76903), 2022-05-31
Supplement: data1 [file elife-76903-data1-v2.zip]

Table 1: Fig1a

|                                              | Kir2.1 | other Kir |
|----------------------------------------------|--------|-----------|
| Benign                                       | 2      | 23        |
| Conflicting interpretations of pathogenicity | 13     | 30        |
| Pathogenic                                   | 40     | 112       |
| Uncertain significance                       | 107    | 314       |
