# Supplementary material for: Determinants of trafficking, conduction, and disease within a K+ channel revealed through multiparametric deep mutational scanning
Source: eLife journal article supplement (doi:10.7554/elife.76903), 2022-05-31
Supplement: data1 [file elife-76903-data1-v2.zip]

Table 1: Figure 2-figure supplement 1b

|          | baseline   | surface    | func    |
|----------|------------|------------|---------|
| baseline | 1.00000000 | 0.1887416  | 7.4e-06 |
| surface  | 0.0511067  | 1.00000000 | 0.0e+00 |
| func     | 0.1730571  | -0.2142445 | 1.0e+00 |
