# Supplementary material for: Determinants of trafficking, conduction, and disease within a K+ channel revealed through multiparametric deep mutational scanning
Source: eLife journal article supplement (doi:10.7554/elife.76903), 2022-05-31
Supplement: supp [file baseline_single_mutations.xlsx]

## Sheet: baseline_single_mutations
MUT3	MUT1	CODON	1	2	3	4	5	6	7	8	9	10	11	12	13	14	15	16	17	18	19	20	21	22	23	24	25	26	27	28	29	30	31	32	33	34	35	36	37	38	39	40	41	42	43	44	45	46	47
Cys	C	TGT	0	0	0	0	1	74	2	0	167	50	298	7	99	0	380	0	179	67	4	81	9	101	0	0	93	1	0	131	110	616	39	0	96	0	13	0	0	66	69	27	29	0	601	110	0	0	1018
Cys	C	TGC	0	1	24	37	91	0	31	26	0	0	2	159	0	94	2	290	0	0	0	0	0	1	37	15	0	150	47	0	64	0	0	46	0	33	83	45	95	0	0	200	0	5	0	0	43	530	0
Asp	D	GAT	0	0	0	0	183	40	274	0	54	18	0	78	0	0	328	161	264	11	9	0	24	118	0	22	263	64	88	0	195	0	0	216	0	0	47	0	190	13	0	96	0	0	0	0	0	44	3
Asp	D	GAC	0	30	120	179	0	0	0	48	0	0	301	0	81	39	150	12	0	0	140	17	0	0	221	0	0	0	274	69	0	5	404	0	55	144	0	37	1	50	10	0	27	10	1	611	85	0	0
Ser	S	TCT	0	0	160	0	0	0	2	3	782	0	0	0	231	0	5	0	1	1	39	1	0	0	0	0	158	0	0	0	109	2	0	11	0	0	0	0	0	0	1	0	0	0	0	0	118	0	88
Ser	S	TCG	0	0	327	0	0	0	0	0	2	368	6	206	235	0	0	119	0	0	0	0	0	71	0	0	0	0	1	0	0	0	0	0	0	0	105	0	0	0	0	0	0	0	0	0	132	0	213
Ser	S	TCA	0	0	0	0	0	0	0	0	0	96	22	1	0	0	0	29	0	0	0	119	0	119	409	0	0	0	0	0	0	0	165	0	0	163	35	0	479	0	0	0	229	3	561	0	0	0	0
Ser	S	TCC	0	6	101	0	1	20	0	0	0	242	1	0	118	0	0	0	0	37	0	0	0	0	33	0	0	54	191	0	0	65	0	0	230	0	111	0	0	0	192	0	0	0	2	0	170	0	0
Ser	S	AGC	0	0	0	0	0	15	148	0	85	0	363	0	0	0	38	0	0	0	0	0	0	0	9	0	0	0	0	162	0	0	0	0	0	0	0	0	0	19	12	438	0	0	13	0	0	680	0
Ser	S	AGT	0	0	0	44	695	82	1087	131	0	0	0	0	0	288	0	0	349	0	0	0	0	0	0	60	35	0	0	1	203	1	0	95	0	0	0	31	0	0	0	0	0	7	0	18	0	0	0
Gln	Q	CAA	0	99	0	0	367	170	32	0	0	132	0	2	28	1	309	0	121	51	7	137	110	3	0	1	27	48	50	0	0	1	0	293	73	61	0	80	0	87	14	0	0	66	9	305	1	10	1
Gln	Q	CAG	0	0	498	212	0	0	2	328	76	0	241	68	157	109	26	455	0	0	0	0	43	55	331	50	0	0	0	23	6	0	98	5	0	0	50	152	26	8	0	37	58	0	0	401	78	0	0
Met	M	ATG	0	2	125	135	62	423	15	146	202	284	101	105	105	211	33	183	36	36	0	55	172	6	20	0	0	68	162	109	96	25	55	27	87	39	59	202	102	119	17	58	336	62	1	125	28	226	4
Asn	N	AAC	0	0	293	21	10	145	48	0	25	60	197	0	0	202	184	1	119	316	119	119	76	0	628	1	0	170	0	0	0	131	21	60	62	277	0	48	84	39	52	0	8	0	0	0	0	87	0
Asn	N	AAT	0	0	0	0	0	33	0	26	204	1	67	155	104	0	0	32	0	0	0	68	0	294	0	504	39	0	30	371	10	0	0	0	0	50	25	126	0	154	5	247	22	12	45	105	156	0	0
Pro	P	CCT	0	0	139	0	0	0	0	3	0	120	0	26	0	0	0	0	0	0	0	0	2	0	0	0	16	0	0	70	37	68	0	21	116	0	85	0	0	50	0	0	451	10	83	0	0	0	0
Pro	P	CCG	0	0	1	60	55	0	0	26	0	0	0	1	0	0	0	28	1	4	0	104	1	0	0	0	0	0	127	0	0	0	0	0	0	0	45	0	0	188	0	0	0	47	0	112	0	0	0
Pro	P	CCA	0	0	82	0	15	185	135	0	39	72	154	0	85	0	0	0	0	0	0	0	52	28	3	0	1	0	1	0	1	0	24	0	0	143	0	0	195	0	281	0	28	1	0	0	10	0	0
Pro	P	CCC	0	0	0	0	0	493	0	0	0	0	1	0	50	130	33	0	63	0	117	0	0	0	284	332	55	128	10	2	0	0	0	0	0	0	1	11	0	0	60	168	0	0	0	1	16	5	3
Lys	K	AAG	0	0	476	16	0	416	353	170	195	0	0	421	14	0	244	142	1	0	43	77	64	0	0	140	0	0	7	19	0	44	11	308	0	60	212	0	9	0	0	0	209	178	170	0	329	0	0
Lys	K	AAA	0	0	0	0	121	1	437	0	3	50	77	3	0	16	126	146	3	25	6	0	0	17	66	0	34	72	0	280	253	0	1	30	43	0	0	388	0	78	20	48	62	0	0	355	0	540	6
Stop	*	TAG	0	0	0	2	0	0	3	0	233	0	0	0	1	0	299	115	0	1	1	0	0	0	0	0	0	0	0	0	0	0	0	2	0	0	0	46	0	0	0	0	0	138	0	1	0	0	0
Stop	*	TGA	0	198	8	0	409	0	0	0	0	0	0	0	15	0	2	0	0	0	16	0	0	0	0	0	0	0	0	0	0	0	0	0	0	0	0	0	1	0	0	0	0	0	167	0	11	0	0
Stop	*	TAA	0	0	125	0	1	0	0	0	99	0	0	4	143	0	0	0	3	0	0	236	0	0	0	0	0	0	0	0	0	0	0	0	0	73	1	1	0	0	0	0	113	0	0	0	383	0	0
Thr	T	ACC	0	0	0	0	0	0	0	0	0	0	263	0	0	17	1	67	0	1	20	1	0	100	0	0	0	0	118	240	25	0	0	0	7	0	0	0	0	0	0	0	0	0	0	0	235	298	0
Thr	T	ACA	0	53	119	0	0	290	47	0	16	4	0	1	173	0	2	2	320	36	0	229	19	331	173	0	0	62	0	1	0	130	63	0	3	433	2	12	85	0	142	0	9	46	0	0	36	0	5
Thr	T	ACG	0	0	0	0	127	106	3	0	0	291	0	43	0	0	40	0	33	0	102	0	0	0	7	57	286	0	0	12	0	0	0	7	0	0	0	63	0	0	126	91	20	32	453	202	0	2	0
Thr	T	ACT	0	0	8	138	0	128	451	75	2	230	0	0	0	0	0	0	0	0	0	1	2	0	154	7	260	0	0	0	0	0	0	1637	0	63	242	1	0	48	128	0	0	0	0	0	0	0	0
Phe	F	TTT	0	0	0	91	38	0	0	0	187	90	34	0	0	0	0	109	0	98	0	343	5	195	0	0	83	112	0	0	1	0	0	0	36	221	27	0	90	0	0	0	0	9	27	1	264	132	0
Phe	F	TTC	0	0	184	0	308	61	12	19	0	32	101	103	32	157	114	0	212	0	48	0	18	0	32	58	0	0	169	47	16	73	19	100	0	0	19	22	0	46	71	149	53	0	22	269	0	0	111
Ala	A	GCA	0	17	267	0	201	0	0	666	0	0	226	164	65	0	0	2	2	0	0	70	0	0	64	16	46	73	205	0	0	0	0	0	33	183	0	101	0	0	0	0	0	0	0	0	13	0	0
Ala	A	GCC	0	6	4	359	0	198	229	0	0	1	0	0	29	0	0	114	217	175	0	0	0	25	227	0	119	0	0	13	93	0	0	22	1	0	0	0	0	0	94	22	39	8	2	0	4	0	0
Ala	A	GCG	0	0	0	195	0	0	0	1	154	7	0	66	0	19	291	81	2	23	70	0	0	105	0	0	39	0	16	0	0	0	81	0	57	0	0	0	87	11	0	110	0	0	262	0	0	0	0
Ala	A	GCT	0	0	1	0	0	0	0	0	0	145	0	4	2	129	19	3	4	0	0	0	50	69	0	0	0	37	74	0	20	66	0	0	0	0	198	0	121	0	6	0	0	0	1	565	0	636	16
Gly	G	GGT	0	43	0	0	1	488	0	247	0	31	0	4	0	157	0	0	34	118	0	0	0	0	0	1	89	3	107	0	0	9	145	0	146	0	0	1	1	46	0	0	0	1	123	6	0	112	2
Gly	G	GGG	0	106	0	127	236	0	0	54	25	0	0	0	0	2	133	517	1	0	184	0	0	147	65	38	1	0	0	1	972	1	0	2	0	28	0	0	85	0	149	0	46	0	0	78	0	2	17
Gly	G	GGA	0	0	0	0	15	0	0	0	0	0	0	122	3	2	70	13	6	266	0	65	0	25	0	0	0	149	0	226	28	0	149	39	159	0	0	0	0	0	0	0	0	0	0	0	0	0	0
Gly	G	GGC	0	262	214	0	0	0	38	0	0	0	96	0	733	184	0	0	18	47	0	0	19	2	0	0	0	1	11	1	48	145	23	0	7	0	48	93	0	0	0	302	0	0	35	144	122	47	0
Ile	I	ATC	0	0	0	190	0	217	93	0	89	0	0	1	0	677	0	0	21	0	11	31	0	100	366	14	0	0	0	96	0	0	29	1	0	1	7	0	0	64	176	0	1	0	0	0	0	148	0
Ile	I	ATA	0	45	36	0	0	0	0	0	0	76	252	495	3	1	0	0	1	0	250	82	9	0	0	137	0	539	126	0	180	23	0	62	0	31	2	0	107	3	0	0	53	1	0	13	0	0	0
Ile	I	ATT	0	0	0	0	147	0	45	34	4	0	150	548	0	70	56	6	0	165	299	0	0	0	0	76	25	1	0	96	0	17	0	24	13	46	134	171	0	0	70	77	0	0	0	0	0	0	63
Leu	L	TTA	0	0	299	0	0	108	0	17	0	2	222	223	147	0	388	124	0	3	0	0	0	0	0	0	0	97	53	0	0	44	0	0	0	1	1	0	0	0	0	0	0	0	0	0	243	0	63
Leu	L	TTG	0	0	1	126	0	0	0	0	1	0	0	0	0	1	2	0	0	1	51	2	184	52	274	111	0	0	0	139	0	501	0	0	0	0	0	1	102	16	0	0	49	114	294	0	0	0	295
Leu	L	CTC	0	0	0	98	0	0	10	0	0	0	514	0	0	0	0	0	0	0	77	47	14	0	0	0	0	0	0	1	254	26	0	0	0	0	1	0	0	0	0	346	1	0	0	140	143	45	1
Leu	L	CTT	0	0	0	0	179	0	0	0	0	0	0	276	154	0	0	0	1	0	0	0	60	0	0	1	81	6	0	0	0	42	80	81	0	0	139	0	75	81	96	0	0	0	0	0	0	0	208
Leu	L	CTG	0	0	0	12	0	1	0	247	1	12	5	0	0	50	10	0	11	0	185	0	0	0	0	111	2	0	0	0	0	0	0	0	0	26	0	32	17	2	0	2	0	43	1	291	0	36	0
Leu	L	CTA	0	6	0	0	210	1	0	0	60	31	0	16	0	0	0	0	201	144	0	0	233	0	0	0	0	11	2	0	1	0	0	0	299	16	15	0	0	1	0	104	31	0	0	0	0	0	0
His	H	CAT	0	40	0	0	0	78	165	0	114	0	0	0	110	160	0	0	0	0	0	0	0	104	0	0	0	0	0	1	62	0	0	87	55	0	0	0	119	0	0	0	24	240	64	23	0	0	0
His	H	CAC	0	0	24	165	99	0	0	49	152	139	98	151	1	0	43	25	81	56	3	36	133	0	197	89	11	83	173	387	0	10	99	15	1	14	35	10	1	70	163	834	214	8	0	0	36	24	11
Arg	R	CGA	0	26	0	0	0	0	0	293	305	0	73	0	0	59	1	0	0	0	0	0	1	0	0	0	0	272	0	0	0	0	0	0	0	0	0	0	0	158	0	87	54	0	28	337	0	54	3
Arg	R	CGC	0	3	0	9	23	0	0	28	0	0	2	0	0	319	175	0	0	0	0	156	0	8	0	0	0	0	0	0	252	0	0	0	0	60	0	0	0	0	0	0	0	0	3	22	0	0	0
Arg	R	CGG	0	0	0	0	87	0	0	0	0	0	1	0	0	0	0	1	2	99	1	0	299	0	24	0	106	0	0	0	0	0	6	0	31	0	0	0	0	0	0	6	98	205	0	0	0	5	0
Arg	R	CGT	0	0	0	0	97	107	0	117	1	0	0	96	90	0	0	0	5	0	0	0	1	0	0	0	0	0	61	0	21	0	0	54	0	0	36	0	0	75	16	379	0	6	0	127	0	1	0
Arg	R	AGG	0	0	0	0	0	0	37	191	1	1	0	0	0	26	58	28	2	488	188	0	0	0	1	175	0	0	0	0	0	0	81	0	298	0	0	121	0	0	0	0	0	0	0	164	474	1	0
Arg	R	AGA	0	195	96	0	201	0	0	0	0	27	1	0	0	304	0	0	0	1	90	126	0	0	0	0	0	0	0	5	0	24	52	0	0	100	0	43	126	0	0	1	0	0	3	0	0	2	0
Trp	W	TGG	0	0	41	144	171	43	289	426	101	42	24	169	18	102	124	115	61	394	338	496	90	6	101	18	32	187	60	51	18	70	189	101	306	319	74	36	68	197	36	42	19	83	286	769	118	95	63
Val	V	GTA	0	164	0	174	0	0	153	0	1	0	0	0	0	0	0	1	3	79	0	0	0	252	0	0	0	0	0	0	1	99	0	0	1	0	0	0	339	0	0	0	1	0	0	0	0	0	0
Val	V	GTC	0	1	48	12	0	0	0	0	0	0	105	138	100	146	143	0	475	0	15	0	30	74	0	0	0	108	514	0	0	0	0	1	0	0	81	0	20	0	0	0	64	0	0	0	239	151	0
Val	V	GTG	0	152	0	0	174	36	0	247	57	300	0	79	0	0	257	88	1	121	102	0	24	0	263	41	33	187	0	2	1	20	147	1	222	310	0	78	0	82	0	0	0	134	0	45	0	0	2
Val	V	GTT	0	0	0	240	0	0	0	1	0	0	83	80	0	2	0	79	1	0	0	144	0	0	0	4	410	111	2	38	158	742	35	362	2	0	0	0	73	0	88	27	0	0	193	0	0	0	441
Glu	E	GAG	0	0	141	211	2	0	0	59	3	0	184	1	0	0	0	0	376	121	0	0	0	0	38	61	16	80	0	0	60	0	171	0	275	16	0	190	32	15	0	0	0	35	475	75	0	0	11
Glu	E	GAA	0	225	0	30	133	97	171	0	6	9	0	517	178	60	156	158	176	37	127	249	211	428	0	0	0	76	83	31	0	62	22	22	1	170	14	13	94	0	130	79	60	0	0	0	245	69	0
Tyr	Y	TAT	0	0	0	0	4	49	181	76	0	486	0	6	0	79	1	1	0	280	15	15	53	215	0	28	0	18	0	97	0	65	76	78	96	0	335	0	21	551	0	153	0	8	145	407	0	0	96
Tyr	Y	TAC	0	0	26	194	0	0	0	0	77	0	111	169	6	0	204	176	258	0	0	1	0	0	23	0	167	0	19	49	91	0	3	181	0	106	0	101	0	28	101	0	2	0	11	0	65	231	24
[truncated: 388 more columns]

## Sheet: Sheet1
	1	2	3	4	5	6	7	8	9	10	11	12	13	14	15	16	17	18	19	20	21	22	23	24	25	26	27	28	29	30	31	32	33	34	35	36	37	38	39	40	41	42	43	44	45	46	47	48	49
TGT	0	1	0	0	0	1	0	0	1	1	1	0	1	0	1	0	1	1	1	1	1	1	0	0	1	0	0	1	0	1	1	0	1	0	0	0	0	1	1	1	1	0	0	1	0	0	1	0	1
TGC	0	0	1	1	1	0	1	1	0	0	0	1	0	1	0	1	0	0	0	0	0	0	1	1	0	1	1	0	1	0	0	1	0	1	1	1	1	0	0	0	0	1	0	0	1	1	0	1	0
GAT	0	0	0	0	1	1	1	0	1	1	0	1	0	0	0	1	0	1	0	0	1	1	0	1	1	1	1	0	1	0	0	1	0	0	1	0	1	0	0	1	0	0	0	0	0	1	1	1	1
GAC	0	1	1	1	0	0	0	1	0	0	1	0	1	1	1	0	0	0	1	1	0	0	1	0	0	0	0	1	0	1	1	0	1	1	0	1	0	1	1	0	1	1	1	1	1	0	0	0	0
TCT	0	0	0	0	0	0	0	0	0	0	0	0	0	0	0	0	0	0	1	0	0	0	0	0	0	0	0	0	1	0	0	1	0	0	0	0	0	0	0	0	0	0	0	0	0	0	0	0	0
TCG	0	0	0	0	0	0	0	0	0	0	0	1	0	0	0	1	0	0	0	0	0	1	0	0	0	0	0	0	0	0	0	0	0	0	0	0	0	0	0	0	0	0	0	0	0	0	1	0	0
TCA	0	0	0	0	0	0	0	0	0	0	1	0	0	0	0	0	0	0	0	1	0	0	1	0	0	0	0	0	0	0	1	0	0	1	0	0	1	0	0	0	1	1	1	0	0	0	0	1	0
TCC	0	1	0	0	0	0	0	0	0	0	0	0	0	0	0	0	0	1	0	0	0	0	0	0	0	1	1	0	0	1	0	0	1	0	0	0	0	0	1	0	0	0	0	0	0	0	0	0	0
AGC	0	0	0	0	0	0	1	0	1	0	0	0	0	0	1	0	0	0	0	0	1	0	0	0	0	0	0	1	0	0	0	0	0	0	0	0	0	1	0	1	0	0	0	0	0	1	0	0	0
AGT	0	0	0	1	1	1	0	1	0	0	0	0	0	0	0	0	1	0	0	0	0	0	0	1	1	0	0	0	0	0	0	0	0	0	0	1	0	0	0	0	0	0	0	1	0	0	0	0	1
CAA	0	1	0	0	1	1	1	0	0	1	0	0	0	0	1	0	1	1	1	1	1	0	0	0	1	1	1	0	0	1	0	1	1	1	0	1	0	1	1	0	0	0	1	1	0	1	1	1	1
CAG	0	0	1	1	0	0	0	1	1	0	1	1	1	1	0	1	0	0	0	0	0	1	1	1	0	0	0	1	1	0	1	0	0	0	1	0	1	0	0	1	0	0	0	0	1	0	0	0	0
ATG	0	1	1	1	1	1	1	1	1	1	1	1	1	1	1	1	1	1	0	1	1	1	1	0	1	1	1	1	1	1	1	1	1	1	1	1	1	1	1	1	1	1	1	1	1	1	1	1	1
AAC	0	0	1	1	1	0	0	0	1	1	0	0	0	1	1	0	1	1	1	0	1	0	1	0	0	1	0	0	0	1	1	0	1	1	0	1	1	1	0	0	0	0	0	0	0	1	0	0	0
AAT	0	1	0	0	0	1	0	1	0	0	1	1	1	0	0	1	0	0	0	1	0	1	0	1	1	0	1	0	1	0	0	0	0	0	1	0	0	0	1	1	1	1	1	1	1	0	1	1	1
CCT	0	0	1	0	0	0	0	1	0	0	0	1	0	0	0	0	0	0	0	0	0	0	0	0	0	0	0	1	1	1	0	1	1	0	0	0	0	0	0	0	1	0	1	0	0	0	0	0	1
CCG	0	1	0	1	1	0	0	0	0	0	0	0	0	0	0	1	0	1	0	1	0	0	0	0	0	0	1	0	0	0	0	0	0	0	1	0	0	1	0	0	0	0	0	1	0	0	0	0	0
CCA	0	0	0	0	0	1	1	0	1	1	1	0	0	0	0	0	0	0	0	0	1	1	0	0	0	0	0	0	0	0	1	0	0	1	0	0	1	0	1	0	0	1	0	0	0	0	0	1	0
CCC	0	0	0	0	0	0	0	0	0	0	0	0	1	1	1	0	1	0	1	0	0	0	1	1	1	1	0	0	0	0	0	0	0	0	0	1	0	0	0	1	0	0	0	0	1	1	1	0	0
AAG	0	1	1	1	0	1	1	1	1	0	0	1	1	0	0	0	0	0	0	0	1	0	0	1	0	0	1	0	0	1	1	1	0	0	1	0	1	0	0	0	1	1	1	0	1	0	0	0	0
AAA	0	0	0	0	1	0	0	0	0	1	1	0	0	1	1	1	1	1	1	0	0	1	1	0	1	1	0	1	1	0	0	0	1	0	0	0	0	1	1	1	0	0	0	1	0	1	1	1	0
TAG	0	0	0	0	0	0	0	0	0	0	0	0	0	0	0	0	0	0	0	0	0	0	0	0	0	0	0	0	0	0	0	0	0	0	0	0	0	0	0	0	0	0	0	0	0	0	0	0	0
TGA	0	0	0	0	0	0	0	0	0	0	0	0	0	0	0	0	0	0	0	0	0	0	0	0	0	0	0	0	0	0	0	0	0	0	0	0	0	0	0	0	0	0	0	0	0	0	0	0	0
TAA	0	0	0	0	0	0	0	0	0	0	0	0	0	0	0	0	0	0	0	0	0	0	0	0	0	0	0	0	0	0	0	0	0	0	0	0	0	0	0	0	0	0	0	0	0	0	0	0	0
ACC	0	0	0	0	0	0	0	0	0	0	1	0	0	1	0	1	0	0	1	0	0	1	0	0	0	0	1	0	1	0	0	0	1	0	0	0	0	0	0	0	0	0	0	0	1	1	0	0	0
ACA	0	1	0	0	0	0	1	0	1	0	0	0	1	0	0	0	1	1	0	1	1	0	0	0	0	1	0	0	0	1	1	0	0	0	0	1	1	0	0	0	0	0	0	0	0	0	1	1	1
ACG	0	0	0	0	1	0	0	0	0	1	0	1	0	0	1	0	0	0	0	0	0	0	0	0	1	0	0	1	0	0	0	0	0	0	0	0	0	0	0	1	1	1	1	1	0	0	0	0	0
ACT	0	0	1	1	0	0	0	1	0	0	0	0	0	0	0	0	0	0	0	0	0	0	0	1	0	0	0	0	0	0	0	1	0	1	1	0	0	1	0	0	0	0	0	0	0	0	0	0	0
TTT	0	0	0	1	0	0	0	0	1	0	1	0	0	0	0	1	0	1	0	1	0	1	0	0	1	1	0	0	0	0	0	0	1	1	0	0	1	0	0	0	0	1	1	0	1	1	0	0	1
TTC	0	1	1	0	1	1	1	1	0	1	0	1	1	1	1	0	1	0	1	0	1	0	1	1	0	0	1	1	1	0	1	1	0	0	1	1	0	1	1	1	1	0	0	1	0	0	0	1	0
GCA	0	0	1	0	1	0	0	1	0	0	1	0	0	0	0	0	0	0	0	1	0	0	1	1	0	0	0	0	0	0	0	0	1	1	0	1	0	0	0	0	0	0	0	0	1	0	0	0	0
GCC	0	1	0	1	0	1	1	0	0	1	0	0	1	0	0	1	1	1	0	0	0	0	0	0	0	0	0	1	1	0	0	1	0	0	0	0	0	0	0	0	1	1	0	0	0	0	0	0	0
GCG	0	0	0	0	0	0	0	0	1	0	0	1	0	0	1	0	0	0	1	0	0	0	0	0	0	0	0	0	0	0	1	0	0	0	0	0	0	1	0	1	0	0	1	0	0	0	0	0	0
GCT	0	0	0	0	0	0	0	0	0	0	0	0	0	1	0	0	0	0	0	0	1	1	0	0	0	1	0	0	0	1	0	0	0	0	1	0	1	0	1	0	0	0	0	1	0	1	1	1	1
GGT	0	0	0	0	0	1	0	1	0	1	0	0	0	1	0	0	1	0	0	0	0	0	0	0	1	0	1	0	0	0	0	0	0	0	0	0	0	1	0	0	0	1	1	0	0	1	0	0	0
GGG	0	0	0	0	1	0	0	0	1	0	0	0	0	0	0	1	0	0	1	0	0	1	1	1	0	0	0	0	0	0	0	0	0	1	0	0	1	0	1	0	1	0	0	0	0	0	1	0	1
GGA	0	0	0	0	0	0	0	0	0	0	0	1	0	0	1	0	0	0	0	1	0	0	0	0	0	1	0	1	0	0	0	1	0	0	0	0	0	0	0	0	0	0	0	0	0	0	0	0	0
GGC	0	0	1	1	0	0	1	0	0	0	1	0	1	0	0	0	0	0	0	0	1	0	0	0	0	0	0	0	0	1	0	0	0	0	1	1	0	0	0	1	0	0	0	1	1	0	0	1	0
ATC	0	0	0	1	0	1	1	0	1	0	0	0	0	0	0	0	1	0	0	1	0	1	1	0	0	0	0	0	0	0	1	0	0	0	0	0	0	1	0	0	0	0	1	0	1	1	0	0	1
ATA	0	1	1	0	0	0	0	0	0	1	0	0	1	0	0	0	0	0	0	0	1	0	0	1	0	1	1	0	1	1	0	1	0	0	0	0	1	0	0	0	1	1	0	1	0	0	0	0	0
ATT	0	0	0	0	1	0	0	1	0	0	0	1	0	1	1	1	0	1	1	0	0	0	0	0	1	0	0	1	0	0	0	0	1	1	1	1	0	0	1	1	0	0	0	0	0	0	1	1	0
TTA	0	0	1	0	0	1	0	1	0	0	1	0	0	0	1	1	0	0	0	0	0	0	0	0	0	0	1	0	0	0	0	0	0	0	0	0	0	0	0	0	0	0	0	0	0	0	0	1	0
TTG	0	0	0	0	0	0	0	0	0	0	0	0	0	0	0	0	0	0	0	0	0	1	1	0	0	0	0	1	0	0	0	0	0	0	0	0	0	1	0	0	1	1	1	0	0	0	1	0	1
CTC	0	0	0	1	0	0	1	0	0	0	0	0	0	0	0	0	0	0	1	1	0	0	0	0	0	0	0	0	1	1	0	0	0	0	0	0	0	0	0	0	0	0	0	1	1	0	0	0	0
CTT	0	0	0	0	1	0	0	0	0	0	0	1	1	0	0	0	0	0	0	0	0	0	0	0	1	1	0	0	0	0	1	1	0	0	1	0	1	0	1	0	0	0	0	0	0	0	0	0	0
CTG	0	0	0	0	0	0	0	0	0	1	0	0	0	1	0	0	0	0	0	0	0	0	0	1	0	0	0	0	0	0	0	0	0	0	0	1	0	0	0	0	0	0	0	0	0	1	0	0	0
CTA	0	1	0	0	0	0	0	0	1	0	0	0	0	0	0	0	1	1	0	0	0	0	0	0	0	0	0	0	0	0	0	0	1	1	0	0	0	0	0	1	0	0	0	0	0	0	0	0	0
CAT	0	1	0	0	0	1	1	0	0	0	0	0	1	1	0	0	0	0	0	0	0	1	0	0	0	0	0	0	1	0	0	0	1	0	0	0	1	0	0	0	0	1	1	1	0	1	0	0	1
CAC	0	0	1	1	1	0	0	1	1	1	1	1	0	0	1	1	1	1	1	1	1	0	1	1	1	1	1	1	0	1	1	1	0	1	1	1	0	0	1	1	1	0	0	0	1	0	1	1	0
CGA	0	0	0	0	0	0	0	0	1	0	1	0	0	1	0	0	0	0	0	0	0	0	0	0	0	1	0	0	0	0	0	0	0	0	0	0	0	1	0	0	0	0	1	0	0	0	1	0	0
CGC	0	1	0	1	0	0	0	0	0	0	0	0	0	0	1	0	0	0	0	1	0	1	0	0	0	0	0	0	1	0	0	0	0	1	0	0	0	0	0	0	0	0	0	0	0	0	0	1	0
CGG	0	0	0	0	0	0	0	0	0	0	0	0	0	0	0	0	0	1	0	0	1	0	1	0	1	0	0	0	0	0	0	0	1	0	0	0	0	0	0	0	1	1	0	0	0	0	0	0	1
CGT	0	0	0	0	0	1	0	0	0	0	0	1	1	0	0	1	1	0	0	0	0	0	0	0	0	0	1	0	0	0	0	1	0	0	1	0	0	0	1	0	0	0	0	0	0	0	0	0	0
AGG	0	0	0	0	0	0	1	0	0	0	0	0	0	0	0	0	0	0	0	0	0	0	0	1	0	0	0	0	0	0	0	0	0	0	0	0	0	0	0	0	0	0	0	0	1	0	0	0	0
AGA	0	0	1	0	0	0	0	0	0	1	0	0	0	0	0	0	0	0	1	0	0	0	0	0	0	0	0	1	0	1	1	0	0	0	0	1	1	0	0	0	0	0	0	0	0	0	0	0	0
TGG	0	1	1	1	1	1	1	1	1	1	1	1	1	1	1	1	1	1	1	1	1	1	1	1	1	1	1	1	1	1	1	1	1	1	1	1	1	1	1	1	1	1	1	1	1	1	1	1	1
GTA	0	0	0	0	0	0	1	0	0	0	0	0	0	0	0	0	0	1	0	0	0	0	0	0	0	0	0	0	0	1	0	0	0	0	0	0	0	0	0	0	0	0	0	0	0	0	0	0	1
GTC	0	0	1	0	0	0	0	0	0	0	0	0	1	1	1	0	1	0	1	0	1	1	0	0	0	0	1	0	0	0	0	0	0	0	1	0	0	0	0	0	1	0	0	0	1	1	0	0	0
GTG	0	1	0	0	1	1	0	1	1	1	0	0	0	0	0	0	0	0	0	0	0	0	1	0	1	0	0	0	0	0	0	0	1	1	0	1	0	1	0	0	0	1	0	1	0	0	0	0	0
GTT	0	0	0	0	0	0	0	0	0	0	1	0	0	0	0	1	0	0	0	1	0	0	0	1	0	0	0	1	1	0	1	1	0	0	0	0	0	0	1	1	0	0	1	0	0	0	1	0	0
GAG	0	0	1	0	0	0	0	1	0	0	1	0	0	0	0	0	1	0	0	0	0	0	1	1	1	1	0	0	1	0	0	0	1	1	0	0	0	1	0	0	0	1	1	1	0	0	1	1	1
GAA	0	1	0	1	1	1	1	0	1	1	0	1	1	1	0	0	0	1	1	1	1	1	0	0	0	0	1	1	0	1	1	1	0	0	1	1	1	0	1	1	1	0	0	0	1	1	0	0	0
TAT	0	1	0	0	1	1	1	1	0	1	0	0	0	1	0	0	0	1	1	1	1	1	0	1	0	1	0	1	0	1	1	0	1	0	1	0	1	0	0	1	0	1	1	1	0	0	0	1	0
TAC	0	0	1	1	0	0	0	0	0	0	1	1	1	0	1	1	1	0	0	0	0	0	1	0	1	0	1	0	1	0	0	1	0	1	0	1	0	1	1	0	1	0	0	0	1	1	1	0	1
[truncated: 385 more columns]

## Sheet: correct codons
MUT3	MUT1	CODON	1	2	3	4	5	6	7	8	9	10	11	12	13	14	15	16	17	18	19	20	21	22	23	24	25	26	27	28	29	30	31	32	33	34	35	36	37	38	39	40	41	42	43	44	45	46	47
Cys	C	TGT	0	0	0	0	0	74	0	0	167	50	298	0	99	0	380	0	179	67	4	81	9	101	0	0	93	0	0	131	0	616	39	0	96	0	0	0	0	66	69	27	29	0	0	110	0	0	1018
Cys	C	TGC	0	0	24	37	91	0	31	26	0	0	0	159	0	94	0	290	0	0	0	0	0	0	37	15	0	150	47	0	64	0	0	46	0	33	83	45	95	0	0	0	0	5	0	0	43	530	0
Asp	D	GAT	0	0	0	0	183	40	274	0	54	18	0	78	0	0	0	161	0	11	0	0	24	118	0	22	263	64	88	0	195	0	0	216	0	0	47	0	190	0	0	96	0	0	0	0	0	44	3
Asp	D	GAC	0	30	120	179	0	0	0	48	0	0	301	0	81	39	150	0	0	0	140	17	0	0	221	0	0	0	0	69	0	5	404	0	55	144	0	37	0	50	10	0	27	10	1	611	85	0	0
Ser	S	TCT	0	0	0	0	0	0	0	0	0	0	0	0	0	0	0	0	0	0	39	0	0	0	0	0	0	0	0	0	109	0	0	11	0	0	0	0	0	0	0	0	0	0	0	0	0	0	0
Ser	S	TCG	0	0	0	0	0	0	0	0	0	0	0	206	0	0	0	119	0	0	0	0	0	71	0	0	0	0	0	0	0	0	0	0	0	0	0	0	0	0	0	0	0	0	0	0	0	0	213
Ser	S	TCA	0	0	0	0	0	0	0	0	0	0	22	0	0	0	0	0	0	0	0	119	0	0	409	0	0	0	0	0	0	0	165	0	0	163	0	0	479	0	0	0	229	3	561	0	0	0	0
Ser	S	TCC	0	6	0	0	0	0	0	0	0	0	0	0	0	0	0	0	0	37	0	0	0	0	0	0	0	54	191	0	0	65	0	0	230	0	0	0	0	0	192	0	0	0	0	0	0	0	0
Ser	S	AGC	0	0	0	0	0	0	148	0	85	0	0	0	0	0	38	0	0	0	0	0	0	0	0	0	0	0	0	162	0	0	0	0	0	0	0	0	0	19	0	438	0	0	0	0	0	680	0
Ser	S	AGT	0	0	0	44	695	82	0	131	0	0	0	0	0	0	0	0	349	0	0	0	0	0	0	60	35	0	0	0	0	0	0	0	0	0	0	31	0	0	0	0	0	0	0	18	0	0	0
Gln	Q	CAA	0	99	0	0	367	170	32	0	0	132	0	0	0	0	309	0	121	51	7	137	110	0	0	0	27	48	50	0	0	1	0	293	73	61	0	80	0	87	14	0	0	0	9	305	0	10	1
Gln	Q	CAG	0	0	498	212	0	0	0	328	76	0	241	68	157	109	0	455	0	0	0	0	0	55	331	50	0	0	0	23	6	0	98	0	0	0	50	0	26	0	0	37	0	0	0	0	78	0	0
Met	M	ATG	0	2	125	135	62	423	15	146	202	284	101	105	105	211	33	183	36	36	0	55	172	6	20	0	0	68	162	109	96	25	55	27	87	39	59	202	102	119	17	58	336	62	1	125	28	226	4
Asn	N	AAC	0	0	293	21	10	0	0	0	25	60	0	0	0	202	184	0	119	316	119	0	76	0	628	0	0	170	0	0	0	131	21	0	62	277	0	48	84	39	0	0	0	0	0	0	0	87	0
Asn	N	AAT	0	0	0	0	0	33	0	26	0	0	67	155	104	0	0	32	0	0	0	68	0	294	0	504	39	0	30	0	10	0	0	0	0	0	25	0	0	0	5	247	22	12	45	105	156	0	0
Pro	P	CCT	0	0	139	0	0	0	0	3	0	0	0	26	0	0	0	0	0	0	0	0	0	0	0	0	0	0	0	70	37	68	0	21	116	0	0	0	0	0	0	0	451	0	83	0	0	0	0
Pro	P	CCG	0	0	0	60	55	0	0	0	0	0	0	0	0	0	0	28	0	4	0	104	0	0	0	0	0	0	127	0	0	0	0	0	0	0	45	0	0	188	0	0	0	0	0	112	0	0	0
Pro	P	CCA	0	0	0	0	0	185	135	0	39	72	154	0	0	0	0	0	0	0	0	0	52	28	0	0	0	0	0	0	0	0	24	0	0	143	0	0	195	0	281	0	0	1	0	0	0	0	0
Pro	P	CCC	0	0	0	0	0	0	0	0	0	0	0	0	50	130	33	0	63	0	117	0	0	0	284	332	55	128	0	0	0	0	0	0	0	0	0	11	0	0	0	168	0	0	0	0	16	5	3
Lys	K	AAG	0	0	476	16	0	416	353	170	195	0	0	421	14	0	0	0	0	0	0	0	64	0	0	140	0	0	7	0	0	44	11	308	0	0	212	0	9	0	0	0	209	178	170	0	329	0	0
Lys	K	AAA	0	0	0	0	121	0	0	0	0	50	77	0	0	16	126	146	3	25	6	0	0	17	66	0	34	72	0	280	253	0	0	0	43	0	0	0	0	78	20	48	0	0	0	355	0	540	6
Stop	*	TAG	0	0	0	0	0	0	0	0	0	0	0	0	0	0	0	0	0	0	0	0	0	0	0	0	0	0	0	0	0	0	0	0	0	0	0	0	0	0	0	0	0	0	0	0	0	0	0
Stop	*	TGA	0	0	0	0	0	0	0	0	0	0	0	0	0	0	0	0	0	0	0	0	0	0	0	0	0	0	0	0	0	0	0	0	0	0	0	0	0	0	0	0	0	0	0	0	0	0	0
Stop	*	TAA	0	0	0	0	0	0	0	0	0	0	0	0	0	0	0	0	0	0	0	0	0	0	0	0	0	0	0	0	0	0	0	0	0	0	0	0	0	0	0	0	0	0	0	0	0	0	0
Thr	T	ACC	0	0	0	0	0	0	0	0	0	0	263	0	0	17	0	67	0	0	20	0	0	100	0	0	0	0	118	0	25	0	0	0	7	0	0	0	0	0	0	0	0	0	0	0	235	298	0
Thr	T	ACA	0	53	0	0	0	0	47	0	16	0	0	0	173	0	0	0	320	36	0	229	19	0	0	0	0	62	0	0	0	130	63	0	0	0	0	12	85	0	0	0	0	0	0	0	0	0	5
Thr	T	ACG	0	0	0	0	127	0	0	0	0	291	0	43	0	0	40	0	0	0	0	0	0	0	0	0	286	0	0	12	0	0	0	0	0	0	0	0	0	0	0	91	20	32	453	202	0	0	0
Thr	T	ACT	0	0	8	138	0	0	0	75	0	0	0	0	0	0	0	0	0	0	0	0	0	0	0	7	0	0	0	0	0	0	0	1637	0	63	242	0	0	48	0	0	0	0	0	0	0	0	0
Phe	F	TTT	0	0	0	91	0	0	0	0	187	0	34	0	0	0	0	109	0	98	0	343	0	195	0	0	83	112	0	0	0	0	0	0	36	221	0	0	90	0	0	0	0	9	27	0	264	132	0
Phe	F	TTC	0	0	184	0	308	61	12	19	0	32	0	103	32	157	114	0	212	0	48	0	18	0	32	58	0	0	169	47	16	0	19	100	0	0	19	22	0	46	71	149	53	0	0	269	0	0	0
Ala	A	GCA	0	0	267	0	201	0	0	666	0	0	226	0	0	0	0	0	0	0	0	70	0	0	64	16	0	0	0	0	0	0	0	0	33	183	0	101	0	0	0	0	0	0	0	0	13	0	0
Ala	A	GCC	0	6	0	359	0	198	229	0	0	1	0	0	29	0	0	114	217	175	0	0	0	0	0	0	0	0	0	13	93	0	0	22	0	0	0	0	0	0	0	0	39	8	0	0	0	0	0
Ala	A	GCG	0	0	0	0	0	0	0	0	154	0	0	66	0	0	291	0	0	0	70	0	0	0	0	0	0	0	0	0	0	0	81	0	0	0	0	0	0	11	0	110	0	0	262	0	0	0	0
Ala	A	GCT	0	0	0	0	0	0	0	0	0	0	0	0	0	129	0	0	0	0	0	0	50	69	0	0	0	37	0	0	0	66	0	0	0	0	198	0	121	0	6	0	0	0	0	565	0	636	16
Gly	G	GGT	0	0	0	0	0	488	0	247	0	31	0	0	0	157	0	0	34	0	0	0	0	0	0	0	89	0	107	0	0	0	0	0	0	0	0	0	0	46	0	0	0	1	123	0	0	112	0
Gly	G	GGG	0	0	0	0	236	0	0	0	25	0	0	0	0	0	0	517	0	0	184	0	0	147	65	38	0	0	0	0	0	0	0	0	0	28	0	0	85	0	149	0	46	0	0	0	0	0	17
Gly	G	GGA	0	0	0	0	0	0	0	0	0	0	0	122	0	0	70	0	0	0	0	65	0	0	0	0	0	149	0	226	0	0	0	39	0	0	0	0	0	0	0	0	0	0	0	0	0	0	0
Gly	G	GGC	0	0	214	0	0	0	38	0	0	0	96	0	733	0	0	0	0	0	0	0	19	0	0	0	0	0	0	0	0	145	0	0	0	0	48	93	0	0	0	302	0	0	0	144	122	0	0
Ile	I	ATC	0	0	0	190	0	217	93	0	89	0	0	0	0	0	0	0	21	0	0	31	0	100	366	0	0	0	0	0	0	0	29	0	0	0	0	0	0	64	0	0	0	0	0	0	0	148	0
Ile	I	ATA	0	45	36	0	0	0	0	0	0	76	0	0	3	0	0	0	0	0	0	0	9	0	0	137	0	539	126	0	180	23	0	62	0	0	0	0	107	0	0	0	53	1	0	13	0	0	0
Ile	I	ATT	0	0	0	0	147	0	0	34	0	0	0	548	0	70	56	6	0	165	299	0	0	0	0	0	25	0	0	96	0	0	0	0	13	46	134	171	0	0	70	77	0	0	0	0	0	0	63
Leu	L	TTA	0	0	299	0	0	108	0	17	0	0	222	0	0	0	388	124	0	0	0	0	0	0	0	0	0	0	53	0	0	0	0	0	0	0	0	0	0	0	0	0	0	0	0	0	0	0	0
Leu	L	TTG	0	0	0	0	0	0	0	0	0	0	0	0	0	0	0	0	0	0	0	0	0	52	274	0	0	0	0	139	0	0	0	0	0	0	0	0	0	16	0	0	49	114	294	0	0	0	295
Leu	L	CTC	0	0	0	98	0	0	10	0	0	0	0	0	0	0	0	0	0	0	77	47	0	0	0	0	0	0	0	0	254	26	0	0	0	0	0	0	0	0	0	0	0	0	0	140	143	0	0
Leu	L	CTT	0	0	0	0	179	0	0	0	0	0	0	276	154	0	0	0	0	0	0	0	0	0	0	0	81	6	0	0	0	0	80	81	0	0	139	0	75	0	96	0	0	0	0	0	0	0	0
Leu	L	CTG	0	0	0	0	0	0	0	0	0	12	0	0	0	50	0	0	0	0	0	0	0	0	0	111	0	0	0	0	0	0	0	0	0	0	0	32	0	0	0	0	0	0	0	0	0	36	0
Leu	L	CTA	0	6	0	0	0	0	0	0	60	0	0	0	0	0	0	0	201	144	0	0	0	0	0	0	0	0	0	0	0	0	0	0	299	16	0	0	0	0	0	104	0	0	0	0	0	0	0
His	H	CAT	0	40	0	0	0	78	165	0	0	0	0	0	110	160	0	0	0	0	0	0	0	104	0	0	0	0	0	0	62	0	0	0	55	0	0	0	119	0	0	0	0	240	64	23	0	0	0
His	H	CAC	0	0	24	165	99	0	0	49	152	139	98	151	0	0	43	25	81	56	3	36	133	0	197	89	11	83	173	387	0	10	99	15	0	14	35	10	0	0	163	834	214	0	0	0	36	0	11
Arg	R	CGA	0	0	0	0	0	0	0	0	305	0	73	0	0	59	0	0	0	0	0	0	0	0	0	0	0	272	0	0	0	0	0	0	0	0	0	0	0	158	0	0	0	0	28	0	0	0	3
Arg	R	CGC	0	3	0	9	0	0	0	0	0	0	0	0	0	0	175	0	0	0	0	156	0	8	0	0	0	0	0	0	252	0	0	0	0	60	0	0	0	0	0	0	0	0	0	0	0	0	0
Arg	R	CGG	0	0	0	0	0	0	0	0	0	0	0	0	0	0	0	0	0	99	0	0	299	0	24	0	106	0	0	0	0	0	0	0	31	0	0	0	0	0	0	0	98	205	0	0	0	0	0
Arg	R	CGT	0	0	0	0	0	107	0	0	0	0	0	96	90	0	0	0	5	0	0	0	0	0	0	0	0	0	61	0	0	0	0	54	0	0	36	0	0	0	16	0	0	0	0	0	0	0	0
Arg	R	AGG	0	0	0	0	0	0	37	0	0	0	0	0	0	0	0	0	0	0	0	0	0	0	0	175	0	0	0	0	0	0	0	0	0	0	0	0	0	0	0	0	0	0	0	0	474	0	0
Arg	R	AGA	0	0	96	0	0	0	0	0	0	27	0	0	0	0	0	0	0	0	90	0	0	0	0	0	0	0	0	5	0	24	52	0	0	0	0	43	126	0	0	0	0	0	0	0	0	0	0
Trp	W	TGG	0	0	41	144	171	43	289	426	101	42	24	169	18	102	124	115	61	394	338	496	90	6	101	18	32	187	60	51	18	70	189	101	306	319	74	36	68	197	36	42	19	83	286	769	118	95	63
Val	V	GTA	0	0	0	0	0	0	153	0	0	0	0	0	0	0	0	0	0	79	0	0	0	0	0	0	0	0	0	0	0	99	0	0	0	0	0	0	0	0	0	0	0	0	0	0	0	0	0
Val	V	GTC	0	0	48	0	0	0	0	0	0	0	0	0	100	146	143	0	475	0	15	0	30	74	0	0	0	0	514	0	0	0	0	0	0	0	81	0	0	0	0	0	64	0	0	0	239	151	0
Val	V	GTG	0	152	0	0	174	36	0	247	57	300	0	0	0	0	0	0	0	0	0	0	0	0	263	0	33	0	0	0	0	0	0	0	222	310	0	78	0	82	0	0	0	134	0	45	0	0	0
Val	V	GTT	0	0	0	0	0	0	0	0	0	0	83	0	0	0	0	79	0	0	0	144	0	0	0	4	0	0	0	38	158	0	35	362	0	0	0	0	0	0	88	27	0	0	193	0	0	0	441
Glu	E	GAG	0	0	141	0	0	0	0	59	0	0	184	0	0	0	0	0	376	0	0	0	0	0	38	61	16	80	0	0	60	0	0	0	275	16	0	0	0	15	0	0	0	35	475	75	0	0	11
Glu	E	GAA	0	225	0	30	133	97	171	0	6	9	0	517	178	60	0	0	0	37	127	249	211	428	0	0	0	0	83	31	0	62	22	22	0	0	14	13	94	0	130	79	60	0	0	0	245	69	0
Tyr	Y	TAT	0	0	0	0	4	49	181	76	0	486	0	0	0	79	0	0	0	280	15	15	53	215	0	28	0	18	0	97	0	65	76	0	96	0	335	0	21	0	0	153	0	8	145	407	0	0	0
Tyr	Y	TAC	0	0	26	194	0	0	0	0	0	0	111	169	6	0	204	176	258	0	0	0	0	0	23	0	167	0	19	0	91	0	0	181	0	106	0	101	0	28	101	0	2	0	0	0	65	231	24
		sum	0	667	3059	2122	3363	2905	2413	2793	1995	2112	2675	3478	2236	1987	2901	2746	3131	2110	1718	2462	1438	2188	3443	1865	1475	2299	2185	1986	1979	1675	1562	3598	2135	2242	1876	1166	2171	1357	1534	3087	2020	1141	3220	4393	2689	4030	2197
		1780949
[truncated: 388 more columns]

## Sheet: incorrect codon
mutation3	mutation	codon	1	2	3	4	5	6	7	8	9	10	11	12	13	14	15	16	17	18	19	20	21	22	23	24	25	26	27	28	29	30	31	32	33	34	35	36	37	38	39	40	41	42	43	44	45	46	47
Cys	C	TGT	0	0	0	0	1	0	2	0	0	0	0	7	0	0	0	0	0	0	0	0	0	0	0	0	0	1	0	0	110	0	0	0	0	0	13	0	0	0	0	0	0	0	601	0	0	0	0
Cys	C	TGC	0	1	0	0	0	0	0	0	0	0	2	0	0	0	2	0	0	0	0	0	0	1	0	0	0	0	0	0	0	0	0	0	0	0	0	0	0	0	0	200	0	0	0	0	0	0	0
Asp	D	GAT	0	0	0	0	0	0	0	0	0	0	0	0	0	0	328	0	264	0	9	0	0	0	0	0	0	0	0	0	0	0	0	0	0	0	0	0	0	13	0	0	0	0	0	0	0	0	0
Asp	D	GAC	0	0	0	0	0	0	0	0	0	0	0	0	0	0	0	12	0	0	0	0	0	0	0	0	0	0	274	0	0	0	0	0	0	0	0	0	1	0	0	0	0	0	0	0	0	0	0
Ser	S	TCT	0	0	160	0	0	0	2	3	782	0	0	0	231	0	5	0	1	1	0	1	0	0	0	0	158	0	0	0	0	2	0	0	0	0	0	0	0	0	1	0	0	0	0	0	118	0	88
Ser	S	TCG	0	0	327	0	0	0	0	0	2	368	6	0	235	0	0	0	0	0	0	0	0	0	0	0	0	0	1	0	0	0	0	0	0	0	105	0	0	0	0	0	0	0	0	0	132	0	0
Ser	S	TCA	0	0	0	0	0	0	0	0	0	96	0	1	0	0	0	29	0	0	0	0	0	119	0	0	0	0	0	0	0	0	0	0	0	0	35	0	0	0	0	0	0	0	0	0	0	0	0
Ser	S	TCC	0	0	101	0	1	20	0	0	0	242	1	0	118	0	0	0	0	0	0	0	0	0	33	0	0	0	0	0	0	0	0	0	0	0	111	0	0	0	0	0	0	0	2	0	170	0	0
Ser	S	AGC	0	0	0	0	0	15	0	0	0	0	363	0	0	0	0	0	0	0	0	0	0	0	9	0	0	0	0	0	0	0	0	0	0	0	0	0	0	0	12	0	0	0	13	0	0	0	0
Ser	S	AGT	0	0	0	0	0	0	1087	0	0	0	0	0	0	288	0	0	0	0	0	0	0	0	0	0	0	0	0	1	203	1	0	95	0	0	0	0	0	0	0	0	0	7	0	0	0	0	0
Gln	Q	CAA	0	0	0	0	0	0	0	0	0	0	0	2	28	1	0	0	0	0	0	0	0	3	0	1	0	0	0	0	0	0	0	0	0	0	0	0	0	0	0	0	0	66	0	0	1	0	0
Gln	Q	CAG	0	0	0	0	0	0	2	0	0	0	0	0	0	0	26	0	0	0	0	0	43	0	0	0	0	0	0	0	0	0	0	5	0	0	0	152	0	8	0	0	58	0	0	401	0	0	0
Met	M	ATG	0	0	0	0	0	0	0	0	0	0	0	0	0	0	0	0	0	0	0	0	0	0	0	0	0	0	0	0	0	0	0	0	0	0	0	0	0	0	0	0	0	0	0	0	0	0	0
Asn	N	AAC	0	0	0	0	0	145	48	0	0	0	197	0	0	0	0	1	0	0	0	119	0	0	0	1	0	0	0	0	0	0	0	60	0	0	0	0	0	0	52	0	8	0	0	0	0	0	0
Asn	N	AAT	0	0	0	0	0	0	0	0	204	1	0	0	0	0	0	0	0	0	0	0	0	0	0	0	0	0	0	371	0	0	0	0	0	50	0	126	0	154	0	0	0	0	0	0	0	0	0
Pro	P	CCT	0	0	0	0	0	0	0	0	0	120	0	0	0	0	0	0	0	0	0	0	2	0	0	0	16	0	0	0	0	0	0	0	0	0	85	0	0	50	0	0	0	10	0	0	0	0	0
Pro	P	CCG	0	0	1	0	0	0	0	26	0	0	0	1	0	0	0	0	1	0	0	0	1	0	0	0	0	0	0	0	0	0	0	0	0	0	0	0	0	0	0	0	0	47	0	0	0	0	0
Pro	P	CCA	0	0	82	0	15	0	0	0	0	0	0	0	85	0	0	0	0	0	0	0	0	0	3	0	1	0	1	0	1	0	0	0	0	0	0	0	0	0	0	0	28	0	0	0	10	0	0
Pro	P	CCC	0	0	0	0	0	493	0	0	0	0	1	0	0	0	0	0	0	0	0	0	0	0	0	0	0	0	10	2	0	0	0	0	0	0	1	0	0	0	60	0	0	0	0	1	0	0	0
Lys	K	AAG	0	0	0	0	0	0	0	0	0	0	0	0	0	0	244	142	1	0	43	77	0	0	0	0	0	0	0	19	0	0	0	0	0	60	0	0	0	0	0	0	0	0	0	0	0	0	0
Lys	K	AAA	0	0	0	0	0	1	437	0	3	0	0	3	0	0	0	0	0	0	0	0	0	0	0	0	0	0	0	0	0	0	1	30	0	0	0	388	0	0	0	0	62	0	0	0	0	0	0
Stop	*	TAG	0	0	0	2	0	0	3	0	233	0	0	0	1	0	299	115	0	1	1	0	0	0	0	0	0	0	0	0	0	0	0	2	0	0	0	46	0	0	0	0	0	138	0	1	0	0	0
Stop	*	TGA	0	198	8	0	409	0	0	0	0	0	0	0	15	0	2	0	0	0	16	0	0	0	0	0	0	0	0	0	0	0	0	0	0	0	0	0	1	0	0	0	0	0	167	0	11	0	0
Stop	*	TAA	0	0	125	0	1	0	0	0	99	0	0	4	143	0	0	0	3	0	0	236	0	0	0	0	0	0	0	0	0	0	0	0	0	73	1	1	0	0	0	0	113	0	0	0	383	0	0
Thr	T	ACC	0	0	0	0	0	0	0	0	0	0	0	0	0	0	1	0	0	1	0	1	0	0	0	0	0	0	0	240	0	0	0	0	0	0	0	0	0	0	0	0	0	0	0	0	0	0	0
Thr	T	ACA	0	0	119	0	0	290	0	0	0	4	0	1	0	0	2	2	0	0	0	0	0	331	173	0	0	0	0	1	0	0	0	0	3	433	2	0	0	0	142	0	9	46	0	0	36	0	0
Thr	T	ACG	0	0	0	0	0	106	3	0	0	0	0	0	0	0	0	0	33	0	102	0	0	0	7	57	0	0	0	0	0	0	0	7	0	0	0	63	0	0	126	0	0	0	0	0	0	2	0
Thr	T	ACT	0	0	0	0	0	128	451	0	2	230	0	0	0	0	0	0	0	0	0	1	2	0	154	0	260	0	0	0	0	0	0	0	0	0	0	1	0	0	128	0	0	0	0	0	0	0	0
Phe	F	TTT	0	0	0	0	38	0	0	0	0	90	0	0	0	0	0	0	0	0	0	0	5	0	0	0	0	0	0	0	1	0	0	0	0	0	27	0	0	0	0	0	0	0	0	1	0	0	0
Phe	F	TTC	0	0	0	0	0	0	0	0	0	0	101	0	0	0	0	0	0	0	0	0	0	0	0	0	0	0	0	0	0	73	0	0	0	0	0	0	0	0	0	0	0	0	22	0	0	0	111
Ala	A	GCA	0	17	0	0	0	0	0	0	0	0	0	164	65	0	0	2	2	0	0	0	0	0	0	0	46	73	205	0	0	0	0	0	0	0	0	0	0	0	0	0	0	0	0	0	0	0	0
Ala	A	GCC	0	0	4	0	0	0	0	0	0	0	0	0	0	0	0	0	0	0	0	0	0	25	227	0	119	0	0	0	0	0	0	0	1	0	0	0	0	0	94	22	0	0	2	0	4	0	0
Ala	A	GCG	0	0	0	195	0	0	0	1	0	7	0	0	0	19	0	81	2	23	0	0	0	105	0	0	39	0	16	0	0	0	0	0	57	0	0	0	87	0	0	0	0	0	0	0	0	0	0
Ala	A	GCT	0	0	1	0	0	0	0	0	0	145	0	4	2	0	19	3	4	0	0	0	0	0	0	0	0	0	74	0	20	0	0	0	0	0	0	0	0	0	0	0	0	0	1	0	0	0	0
Gly	G	GGT	0	43	0	0	1	0	0	0	0	0	0	4	0	0	0	0	0	118	0	0	0	0	0	1	0	3	0	0	0	9	145	0	146	0	0	1	1	0	0	0	0	0	0	6	0	0	2
Gly	G	GGG	0	106	0	127	0	0	0	54	0	0	0	0	0	2	133	0	1	0	0	0	0	0	0	0	1	0	0	1	972	1	0	2	0	0	0	0	0	0	0	0	0	0	0	78	0	2	0
Gly	G	GGA	0	0	0	0	15	0	0	0	0	0	0	0	3	2	0	13	6	266	0	0	0	25	0	0	0	0	0	0	28	0	149	0	159	0	0	0	0	0	0	0	0	0	0	0	0	0	0
Gly	G	GGC	0	262	0	0	0	0	0	0	0	0	0	0	0	184	0	0	18	47	0	0	0	2	0	0	0	1	11	1	48	0	23	0	7	0	0	0	0	0	0	0	0	0	35	0	0	47	0
Ile	I	ATC	0	0	0	0	0	0	0	0	0	0	0	1	0	677	0	0	0	0	11	0	0	0	0	14	0	0	0	96	0	0	0	1	0	1	7	0	0	0	176	0	1	0	0	0	0	0	0
Ile	I	ATA	0	0	0	0	0	0	0	0	0	0	252	495	0	1	0	0	1	0	250	82	0	0	0	0	0	0	0	0	0	0	0	0	0	31	2	0	0	3	0	0	0	0	0	0	0	0	0
Ile	I	ATT	0	0	0	0	0	0	45	0	4	0	150	0	0	0	0	0	0	0	0	0	0	0	0	76	0	1	0	0	0	17	0	24	0	0	0	0	0	0	0	0	0	0	0	0	0	0	0
Leu	L	TTA	0	0	0	0	0	0	0	0	0	2	0	223	147	0	0	0	0	3	0	0	0	0	0	0	0	97	0	0	0	44	0	0	0	1	1	0	0	0	0	0	0	0	0	0	243	0	63
Leu	L	TTG	0	0	1	126	0	0	0	0	1	0	0	0	0	1	2	0	0	1	51	2	184	0	0	111	0	0	0	0	0	501	0	0	0	0	0	1	102	0	0	0	0	0	0	0	0	0	0
Leu	L	CTC	0	0	0	0	0	0	0	0	0	0	514	0	0	0	0	0	0	0	0	0	14	0	0	0	0	0	0	1	0	0	0	0	0	0	1	0	0	0	0	346	1	0	0	0	0	45	1
Leu	L	CTT	0	0	0	0	0	0	0	0	0	0	0	0	0	0	0	0	1	0	0	0	60	0	0	1	0	0	0	0	0	42	0	0	0	0	0	0	0	81	0	0	0	0	0	0	0	0	208
Leu	L	CTG	0	0	0	12	0	1	0	247	1	0	5	0	0	0	10	0	11	0	185	0	0	0	0	0	2	0	0	0	0	0	0	0	0	26	0	0	17	2	0	2	0	43	1	291	0	0	0
Leu	L	CTA	0	0	0	0	210	1	0	0	0	31	0	16	0	0	0	0	0	0	0	0	233	0	0	0	0	11	2	0	1	0	0	0	0	0	15	0	0	1	0	0	31	0	0	0	0	0	0
His	H	CAT	0	0	0	0	0	0	0	0	114	0	0	0	0	0	0	0	0	0	0	0	0	0	0	0	0	0	0	1	0	0	0	87	0	0	0	0	0	0	0	0	24	0	0	0	0	0	0
His	H	CAC	0	0	0	0	0	0	0	0	0	0	0	0	1	0	0	0	0	0	0	0	0	0	0	0	0	0	0	0	0	0	0	0	1	0	0	0	1	70	0	0	0	8	0	0	0	24	0
Arg	R	CGA	0	26	0	0	0	0	0	293	0	0	0	0	0	0	1	0	0	0	0	0	1	0	0	0	0	0	0	0	0	0	0	0	0	0	0	0	0	0	0	87	54	0	0	337	0	54	0
Arg	R	CGC	0	0	0	0	23	0	0	28	0	0	2	0	0	319	0	0	0	0	0	0	0	0	0	0	0	0	0	0	0	0	0	0	0	0	0	0	0	0	0	0	0	0	3	22	0	0	0
Arg	R	CGG	0	0	0	0	87	0	0	0	0	0	1	0	0	0	0	1	2	0	1	0	0	0	0	0	0	0	0	0	0	0	6	0	0	0	0	0	0	0	0	6	0	0	0	0	0	5	0
Arg	R	CGT	0	0	0	0	97	0	0	117	1	0	0	0	0	0	0	0	0	0	0	0	1	0	0	0	0	0	0	0	21	0	0	0	0	0	0	0	0	75	0	379	0	6	0	127	0	1	0
Arg	R	AGG	0	0	0	0	0	0	0	191	1	1	0	0	0	26	58	28	2	488	188	0	0	0	1	0	0	0	0	0	0	0	81	0	298	0	0	121	0	0	0	0	0	0	0	164	0	1	0
Arg	R	AGA	0	195	0	0	201	0	0	0	0	0	1	0	0	304	0	0	0	1	0	126	0	0	0	0	0	0	0	0	0	0	0	0	0	100	0	0	0	0	0	1	0	0	3	0	0	2	0
Trp	W	TGG	0	0	0	0	0	0	0	0	0	0	0	0	0	0	0	0	0	0	0	0	0	0	0	0	0	0	0	0	0	0	0	0	0	0	0	0	0	0	0	0	0	0	0	0	0	0	0
Val	V	GTA	0	164	0	174	0	0	0	0	1	0	0	0	0	0	0	1	3	0	0	0	0	252	0	0	0	0	0	0	1	0	0	0	1	0	0	0	339	0	0	0	1	0	0	0	0	0	0
Val	V	GTC	0	1	0	12	0	0	0	0	0	0	105	138	0	0	0	0	0	0	0	0	0	0	0	0	0	108	0	0	0	0	0	1	0	0	0	0	20	0	0	0	0	0	0	0	0	0	0
Val	V	GTG	0	0	0	0	0	0	0	0	0	0	0	79	0	0	257	88	1	121	102	0	24	0	0	41	0	187	0	2	1	20	147	1	0	0	0	0	0	0	0	0	0	0	0	0	0	0	2
Val	V	GTT	0	0	0	240	0	0	0	1	0	0	0	80	0	2	0	0	1	0	0	0	0	0	0	0	410	111	2	0	0	742	0	0	2	0	0	0	73	0	0	0	0	0	0	0	0	0	0
Glu	E	GAG	0	0	0	211	2	0	0	0	3	0	0	1	0	0	0	0	0	121	0	0	0	0	0	0	0	0	0	0	0	0	171	0	0	0	0	190	32	0	0	0	0	0	0	0	0	0	0
Glu	E	GAA	0	0	0	0	0	0	0	0	0	0	0	0	0	0	156	158	176	0	0	0	0	0	0	0	0	76	0	0	0	0	0	0	1	170	0	0	0	0	0	0	0	0	0	0	0	0	0
Tyr	Y	TAT	0	0	0	0	0	0	0	0	0	0	0	6	0	0	1	1	0	0	0	0	0	0	0	0	0	0	0	0	0	0	0	78	0	0	0	0	0	551	0	0	0	0	0	0	0	0	96
Tyr	Y	TAC	0	0	0	0	0	0	0	0	77	0	0	0	0	0	0	0	0	0	0	1	0	0	0	0	0	0	0	49	0	0	3	0	0	0	0	0	0	0	0	0	0	0	11	0	0	0	0
		sum	0	1013	929	1099	1101	1200	2080	961	1528	1337	1701	1230	1074	1826	1546	677	534	1192	959	646	570	863	607	303	1052	669	596	785	1407	1452	726	393	676	945	406	1090	674	1008	791	1043	390	371	861	1429	1108	183	571
		592060
[truncated: 388 more columns]

## Sheet: export
mutation3	mutation	codon	1	2	3	4	5	6	7	8	9	10	11	12	13	14	15	16	17	18	19	20	21	22	23	24	25	26	27	28	29	30	31	32	33	34	35	36	37	38	39	40	41	42	43	44	45	46	47
Cys	C	TGT	0	0	0	0	0	74	0	0	167	50	298	0	99	0	380	0	179	67	4	81	9	101	0	0	93	0	0	131	0	616	39	0	96	0	0	0	0	66	69	27	29	0	0	110	0	0	1018
Cys	C	TGC	0	0	24	37	91	0	31	26	0	0	0	159	0	94	0	290	0	0	0	0	0	0	37	15	0	150	47	0	64	0	0	46	0	33	83	45	95	0	0	0	0	5	0	0	43	530	0
Asp	D	GAT	0	0	0	0	183	40	274	0	54	18	0	78	0	0	0	161	0	11	0	0	24	118	0	22	263	64	88	0	195	0	0	216	0	0	47	0	190	0	0	96	0	0	0	0	0	44	3
Asp	D	GAC	0	30	120	179	0	0	0	48	0	0	301	0	81	39	150	0	0	0	140	17	0	0	221	0	0	0	0	69	0	5	404	0	55	144	0	37	0	50	10	0	27	10	1	611	85	0	0
Ser	S	TCT	0	0	0	0	0	0	0	0	0	0	0	0	0	0	0	0	0	0	39	0	0	0	0	0	0	0	0	0	109	0	0	11	0	0	0	0	0	0	0	0	0	0	0	0	0	0	0
Ser	S	TCG	0	0	0	0	0	0	0	0	0	0	0	206	0	0	0	119	0	0	0	0	0	71	0	0	0	0	0	0	0	0	0	0	0	0	0	0	0	0	0	0	0	0	0	0	0	0	213
Ser	S	TCA	0	0	0	0	0	0	0	0	0	0	22	0	0	0	0	0	0	0	0	119	0	0	409	0	0	0	0	0	0	0	165	0	0	163	0	0	479	0	0	0	229	3	561	0	0	0	0
Ser	S	TCC	0	6	0	0	0	0	0	0	0	0	0	0	0	0	0	0	0	37	0	0	0	0	0	0	0	54	191	0	0	65	0	0	230	0	0	0	0	0	192	0	0	0	0	0	0	0	0
Ser	S	AGC	0	0	0	0	0	0	148	0	85	0	0	0	0	0	38	0	0	0	0	0	0	0	0	0	0	0	0	162	0	0	0	0	0	0	0	0	0	19	0	438	0	0	0	0	0	680	0
Ser	S	AGT	0	0	0	44	695	82	0	131	0	0	0	0	0	0	0	0	349	0	0	0	0	0	0	60	35	0	0	0	0	0	0	0	0	0	0	31	0	0	0	0	0	0	0	18	0	0	0
Gln	Q	CAA	0	99	0	0	367	170	32	0	0	132	0	0	0	0	309	0	121	51	7	137	110	0	0	0	27	48	50	0	0	1	0	293	73	61	0	80	0	87	14	0	0	0	9	305	0	10	1
Gln	Q	CAG	0	0	498	212	0	0	0	328	76	0	241	68	157	109	0	455	0	0	0	0	0	55	331	50	0	0	0	23	6	0	98	0	0	0	50	0	26	0	0	37	0	0	0	0	78	0	0
Met	M	ATG	0	2	125	135	62	423	15	146	202	284	101	105	105	211	33	183	36	36	0	55	172	6	20	0	0	68	162	109	96	25	55	27	87	39	59	202	102	119	17	58	336	62	1	125	28	226	4
Asn	N	AAC	0	0	293	21	10	0	0	0	25	60	0	0	0	202	184	0	119	316	119	0	76	0	628	0	0	170	0	0	0	131	21	0	62	277	0	48	84	39	0	0	0	0	0	0	0	87	0
Asn	N	AAT	0	0	0	0	0	33	0	26	0	0	67	155	104	0	0	32	0	0	0	68	0	294	0	504	39	0	30	0	10	0	0	0	0	0	25	0	0	0	5	247	22	12	45	105	156	0	0
Pro	P	CCT	0	0	139	0	0	0	0	3	0	0	0	26	0	0	0	0	0	0	0	0	0	0	0	0	0	0	0	70	37	68	0	21	116	0	0	0	0	0	0	0	451	0	83	0	0	0	0
Pro	P	CCG	0	0	0	60	55	0	0	0	0	0	0	0	0	0	0	28	0	4	0	104	0	0	0	0	0	0	127	0	0	0	0	0	0	0	45	0	0	188	0	0	0	0	0	112	0	0	0
Pro	P	CCA	0	0	0	0	0	185	135	0	39	72	154	0	0	0	0	0	0	0	0	0	52	28	0	0	0	0	0	0	0	0	24	0	0	143	0	0	195	0	281	0	0	1	0	0	0	0	0
Pro	P	CCC	0	0	0	0	0	0	0	0	0	0	0	0	50	130	33	0	63	0	117	0	0	0	284	332	55	128	0	0	0	0	0	0	0	0	0	11	0	0	0	168	0	0	0	0	16	5	3
Lys	K	AAG	0	0	476	16	0	416	353	170	195	0	0	421	14	0	0	0	0	0	0	0	64	0	0	140	0	0	7	0	0	44	11	308	0	0	212	0	9	0	0	0	209	178	170	0	329	0	0
Lys	K	AAA	0	0	0	0	121	0	0	0	0	50	77	0	0	16	126	146	3	25	6	0	0	17	66	0	34	72	0	280	253	0	0	0	43	0	0	0	0	78	20	48	0	0	0	355	0	540	6
Stop	*	TAG	0	0	0	0	0	0	0	0	0	0	0	0	0	0	0	0	0	0	0	0	0	0	0	0	0	0	0	0	0	0	0	0	0	0	0	0	0	0	0	0	0	0	0	0	0	0	0
Stop	*	TGA	0	0	0	0	0	0	0	0	0	0	0	0	0	0	0	0	0	0	0	0	0	0	0	0	0	0	0	0	0	0	0	0	0	0	0	0	0	0	0	0	0	0	0	0	0	0	0
Stop	*	TAA	0	0	0	0	0	0	0	0	0	0	0	0	0	0	0	0	0	0	0	0	0	0	0	0	0	0	0	0	0	0	0	0	0	0	0	0	0	0	0	0	0	0	0	0	0	0	0
Thr	T	ACC	0	0	0	0	0	0	0	0	0	0	263	0	0	17	0	67	0	0	20	0	0	100	0	0	0	0	118	0	25	0	0	0	7	0	0	0	0	0	0	0	0	0	0	0	235	298	0
Thr	T	ACA	0	53	0	0	0	0	47	0	16	0	0	0	173	0	0	0	320	36	0	229	19	0	0	0	0	62	0	0	0	130	63	0	0	0	0	12	85	0	0	0	0	0	0	0	0	0	5
Thr	T	ACG	0	0	0	0	127	0	0	0	0	291	0	43	0	0	40	0	0	0	0	0	0	0	0	0	286	0	0	12	0	0	0	0	0	0	0	0	0	0	0	91	20	32	453	202	0	0	0
Thr	T	ACT	0	0	8	138	0	0	0	75	0	0	0	0	0	0	0	0	0	0	0	0	0	0	0	7	0	0	0	0	0	0	0	1637	0	63	242	0	0	48	0	0	0	0	0	0	0	0	0
Phe	F	TTT	0	0	0	91	0	0	0	0	187	0	34	0	0	0	0	109	0	98	0	343	0	195	0	0	83	112	0	0	0	0	0	0	36	221	0	0	90	0	0	0	0	9	27	0	264	132	0
Phe	F	TTC	0	0	184	0	308	61	12	19	0	32	0	103	32	157	114	0	212	0	48	0	18	0	32	58	0	0	169	47	16	0	19	100	0	0	19	22	0	46	71	149	53	0	0	269	0	0	0
Ala	A	GCA	0	0	267	0	201	0	0	666	0	0	226	0	0	0	0	0	0	0	0	70	0	0	64	16	0	0	0	0	0	0	0	0	33	183	0	101	0	0	0	0	0	0	0	0	13	0	0
Ala	A	GCC	0	6	0	359	0	198	229	0	0	1	0	0	29	0	0	114	217	175	0	0	0	0	0	0	0	0	0	13	93	0	0	22	0	0	0	0	0	0	0	0	39	8	0	0	0	0	0
Ala	A	GCG	0	0	0	0	0	0	0	0	154	0	0	66	0	0	291	0	0	0	70	0	0	0	0	0	0	0	0	0	0	0	81	0	0	0	0	0	0	11	0	110	0	0	262	0	0	0	0
Ala	A	GCT	0	0	0	0	0	0	0	0	0	0	0	0	0	129	0	0	0	0	0	0	50	69	0	0	0	37	0	0	0	66	0	0	0	0	198	0	121	0	6	0	0	0	0	565	0	636	16
Gly	G	GGT	0	0	0	0	0	488	0	247	0	31	0	0	0	157	0	0	34	0	0	0	0	0	0	0	89	0	107	0	0	0	0	0	0	0	0	0	0	46	0	0	0	1	123	0	0	112	0
Gly	G	GGG	0	0	0	0	236	0	0	0	25	0	0	0	0	0	0	517	0	0	184	0	0	147	65	38	0	0	0	0	0	0	0	0	0	28	0	0	85	0	149	0	46	0	0	0	0	0	17
Gly	G	GGA	0	0	0	0	0	0	0	0	0	0	0	122	0	0	70	0	0	0	0	65	0	0	0	0	0	149	0	226	0	0	0	39	0	0	0	0	0	0	0	0	0	0	0	0	0	0	0
Gly	G	GGC	0	0	214	0	0	0	38	0	0	0	96	0	733	0	0	0	0	0	0	0	19	0	0	0	0	0	0	0	0	145	0	0	0	0	48	93	0	0	0	302	0	0	0	144	122	0	0
Ile	I	ATC	0	0	0	190	0	217	93	0	89	0	0	0	0	0	0	0	21	0	0	31	0	100	366	0	0	0	0	0	0	0	29	0	0	0	0	0	0	64	0	0	0	0	0	0	0	148	0
Ile	I	ATA	0	45	36	0	0	0	0	0	0	76	0	0	3	0	0	0	0	0	0	0	9	0	0	137	0	539	126	0	180	23	0	62	0	0	0	0	107	0	0	0	53	1	0	13	0	0	0
Ile	I	ATT	0	0	0	0	147	0	0	34	0	0	0	548	0	70	56	6	0	165	299	0	0	0	0	0	25	0	0	96	0	0	0	0	13	46	134	171	0	0	70	77	0	0	0	0	0	0	63
Leu	L	TTA	0	0	299	0	0	108	0	17	0	0	222	0	0	0	388	124	0	0	0	0	0	0	0	0	0	0	53	0	0	0	0	0	0	0	0	0	0	0	0	0	0	0	0	0	0	0	0
Leu	L	TTG	0	0	0	0	0	0	0	0	0	0	0	0	0	0	0	0	0	0	0	0	0	52	274	0	0	0	0	139	0	0	0	0	0	0	0	0	0	16	0	0	49	114	294	0	0	0	295
Leu	L	CTC	0	0	0	98	0	0	10	0	0	0	0	0	0	0	0	0	0	0	77	47	0	0	0	0	0	0	0	0	254	26	0	0	0	0	0	0	0	0	0	0	0	0	0	140	143	0	0
Leu	L	CTT	0	0	0	0	179	0	0	0	0	0	0	276	154	0	0	0	0	0	0	0	0	0	0	0	81	6	0	0	0	0	80	81	0	0	139	0	75	0	96	0	0	0	0	0	0	0	0
Leu	L	CTG	0	0	0	0	0	0	0	0	0	12	0	0	0	50	0	0	0	0	0	0	0	0	0	111	0	0	0	0	0	0	0	0	0	0	0	32	0	0	0	0	0	0	0	0	0	36	0
Leu	L	CTA	0	6	0	0	0	0	0	0	60	0	0	0	0	0	0	0	201	144	0	0	0	0	0	0	0	0	0	0	0	0	0	0	299	16	0	0	0	0	0	104	0	0	0	0	0	0	0
His	H	CAT	0	40	0	0	0	78	165	0	0	0	0	0	110	160	0	0	0	0	0	0	0	104	0	0	0	0	0	0	62	0	0	0	55	0	0	0	119	0	0	0	0	240	64	23	0	0	0
His	H	CAC	0	0	24	165	99	0	0	49	152	139	98	151	0	0	43	25	81	56	3	36	133	0	197	89	11	83	173	387	0	10	99	15	0	14	35	10	0	0	163	834	214	0	0	0	36	0	11
Arg	R	CGA	0	0	0	0	0	0	0	0	305	0	73	0	0	59	0	0	0	0	0	0	0	0	0	0	0	272	0	0	0	0	0	0	0	0	0	0	0	158	0	0	0	0	28	0	0	0	3
Arg	R	CGC	0	3	0	9	0	0	0	0	0	0	0	0	0	0	175	0	0	0	0	156	0	8	0	0	0	0	0	0	252	0	0	0	0	60	0	0	0	0	0	0	0	0	0	0	0	0	0
Arg	R	CGG	0	0	0	0	0	0	0	0	0	0	0	0	0	0	0	0	0	99	0	0	299	0	24	0	106	0	0	0	0	0	0	0	31	0	0	0	0	0	0	0	98	205	0	0	0	0	0
Arg	R	CGT	0	0	0	0	0	107	0	0	0	0	0	96	90	0	0	0	5	0	0	0	0	0	0	0	0	0	61	0	0	0	0	54	0	0	36	0	0	0	16	0	0	0	0	0	0	0	0
Arg	R	AGG	0	0	0	0	0	0	37	0	0	0	0	0	0	0	0	0	0	0	0	0	0	0	0	175	0	0	0	0	0	0	0	0	0	0	0	0	0	0	0	0	0	0	0	0	474	0	0
Arg	R	AGA	0	0	96	0	0	0	0	0	0	27	0	0	0	0	0	0	0	0	90	0	0	0	0	0	0	0	0	5	0	24	52	0	0	0	0	43	126	0	0	0	0	0	0	0	0	0	0
Trp	W	TGG	0	0	41	144	171	43	289	426	101	42	24	169	18	102	124	115	61	394	338	496	90	6	101	18	32	187	60	51	18	70	189	101	306	319	74	36	68	197	36	42	19	83	286	769	118	95	63
Val	V	GTA	0	0	0	0	0	0	153	0	0	0	0	0	0	0	0	0	0	79	0	0	0	0	0	0	0	0	0	0	0	99	0	0	0	0	0	0	0	0	0	0	0	0	0	0	0	0	0
Val	V	GTC	0	0	48	0	0	0	0	0	0	0	0	0	100	146	143	0	475	0	15	0	30	74	0	0	0	0	514	0	0	0	0	0	0	0	81	0	0	0	0	0	64	0	0	0	239	151	0
Val	V	GTG	0	152	0	0	174	36	0	247	57	300	0	0	0	0	0	0	0	0	0	0	0	0	263	0	33	0	0	0	0	0	0	0	222	310	0	78	0	82	0	0	0	134	0	45	0	0	0
Val	V	GTT	0	0	0	0	0	0	0	0	0	0	83	0	0	0	0	79	0	0	0	144	0	0	0	4	0	0	0	38	158	0	35	362	0	0	0	0	0	0	88	27	0	0	193	0	0	0	441
Glu	E	GAG	0	0	141	0	0	0	0	59	0	0	184	0	0	0	0	0	376	0	0	0	0	0	38	61	16	80	0	0	60	0	0	0	275	16	0	0	0	15	0	0	0	35	475	75	0	0	11
Glu	E	GAA	0	225	0	30	133	97	171	0	6	9	0	517	178	60	0	0	0	37	127	249	211	428	0	0	0	0	83	31	0	62	22	22	0	0	14	13	94	0	130	79	60	0	0	0	245	69	0
Tyr	Y	TAT	0	0	0	0	4	49	181	76	0	486	0	0	0	79	0	0	0	280	15	15	53	215	0	28	0	18	0	97	0	65	76	0	96	0	335	0	21	0	0	153	0	8	145	407	0	0	0
Tyr	Y	TAC	0	0	26	194	0	0	0	0	0	0	111	169	6	0	204	176	258	0	0	0	0	0	23	0	167	0	19	0	91	0	0	181	0	106	0	101	0	28	101	0	2	0	0	0	65	231	24
[truncated: 388 more columns]
