# Supplementary material for: Determinants of trafficking, conduction, and disease within a K+ channel revealed through multiparametric deep mutational scanning
Source: eLife journal article supplement (doi:10.7554/elife.76903), 2022-05-31
Supplement: supp [file elife_poa_e76903_Figure_1_figure_supplement_3.pdf › elife_poa_e76903_Figure_1_figure_supplement_3.pdf]

|                                                         |           |
|---------------------------------------------------------|-----------|
| total cells collected (all replicates and populations): | 5,092,441 |
|---------------------------------------------------------|-----------|
