# Supplementary material for: Determinants of trafficking, conduction, and disease within a K+ channel revealed through multiparametric deep mutational scanning
Source: eLife journal article supplement (doi:10.7554/elife.76903), 2022-05-31

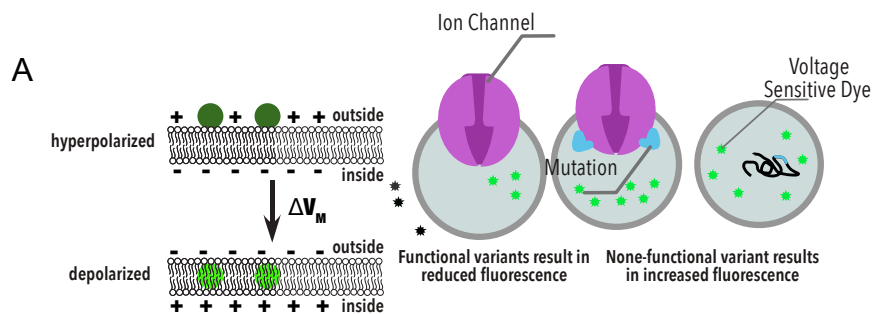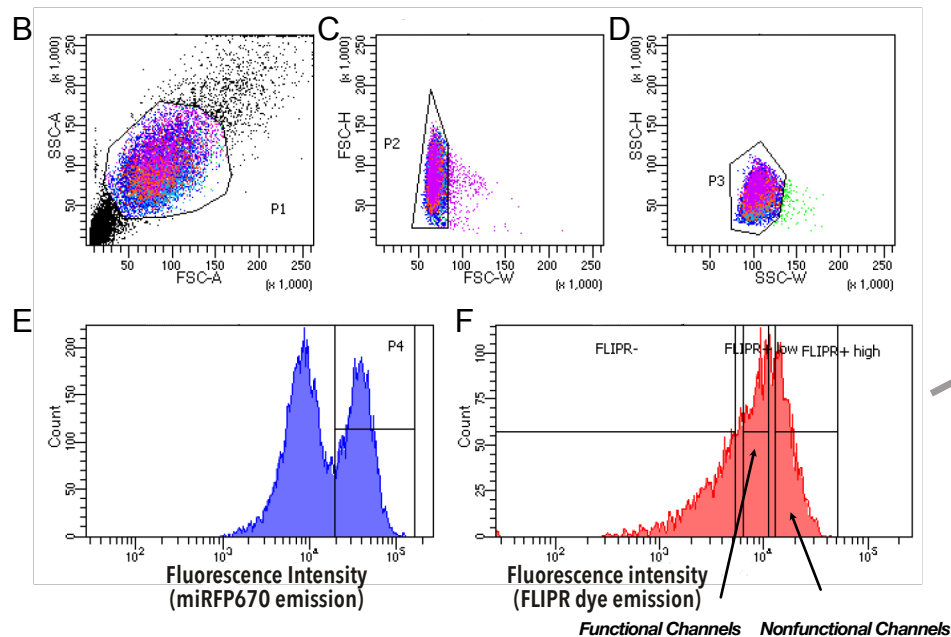

**G**

| Population  | #Events | %Parent | %Total |
|-------------|---------|---------|--------|
| All Events  | 20,000  | ###     | 100.0  |
| P1          | 11,633  | 58.2    | 58.2   |
| P2          | 11,271  | 96.9    | 56.4   |
| P3          | 11,135  | 98.8    | 55.7   |
| P4          | 4,566   | 41.0    | 22.8   |
| FLIPR-      | 1,315   | 28.8    | 6.6    |
| FLIPR+ low  | 1,305   | 28.6    | 6.5    |
| FLIPR+ high | 1,292   | 28.3    | 6.5    |

**H**

|                                                   | FLIPR-  | FLIPR+ low | FLIPR+high | sum       |
|---------------------------------------------------|---------|------------|------------|-----------|
| Replicate 1                                       | 387,751 | 692,070    | 1,000,000  | 2,079,821 |
| Replicate 2                                       | 385,835 | 391,105    | 400,150    | 1,177,030 |
| total cells collected (all replicates and pools): |         |            |            | 3,256,851 |

**NovaSeq and Align Reads**

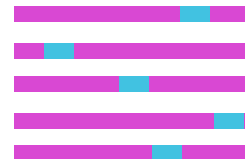

**Isolate Genomic DNA**

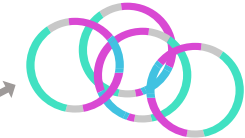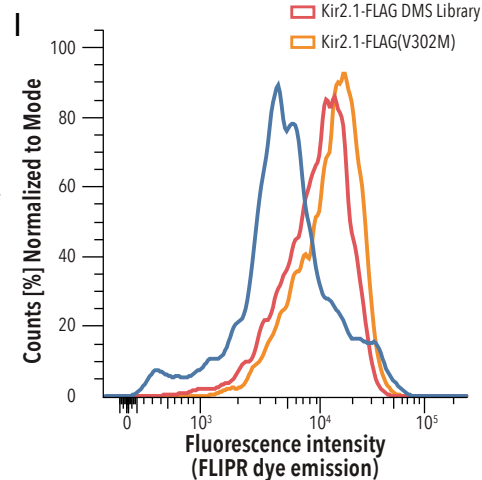

Supplement: supp [file elife_poa_e76903_Figure_1_figure_supplement_4.pdf › elife_poa_e76903_Figure_1_figure_supplement_4.pdf]
