# Supplementary material for: Determinants of trafficking, conduction, and disease within a K+ channel revealed through multiparametric deep mutational scanning
Source: eLife journal article supplement (doi:10.7554/elife.76903), 2022-05-31
Supplement: supp [file elife_poa_e76903_Figure_2_figure_supplement_1.pdf › elife_poa_e76903_Figure_2_figure_supplement_1.pdf]

# A

## Missing Data in:

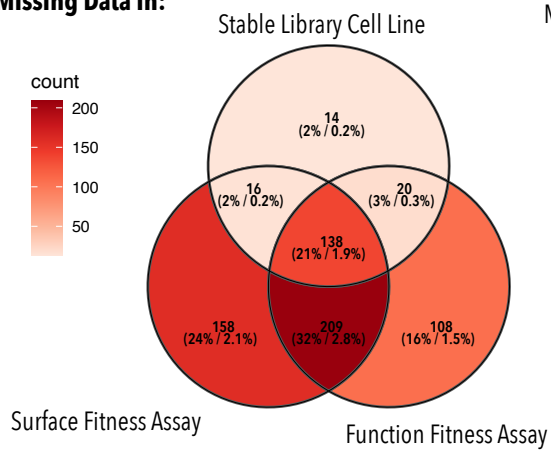

# B

## Missing Data (Pearson Correlation)

|          | Baseline | Surface | Function |
|----------|----------|---------|----------|
| Baseline | 1        |         |          |
| Surface  | 0.05     | 1       |          |
| Function | 0.17     | -0.21   | 1        |
