# Supplementary material for: Determinants of trafficking, conduction, and disease within a K+ channel revealed through multiparametric deep mutational scanning
Source: eLife journal article supplement (doi:10.7554/elife.76903), 2022-05-31
Supplement: supp [file elife_poa_e76903_Figure_2_figure_supplement_4.pdf › elife_poa_e76903_Figure_2_figure_supplement_4.pdf]

## Surface Fitness Assay - Mapped Reads

|                       | Negative |        | Low    |        | Up     |        | High   |        |
|-----------------------|----------|--------|--------|--------|--------|--------|--------|--------|
|                       | Rep. 1   | Rep. 2 | Rep. 1 | Rep. 2 | Rep. 1 | Rep. 2 | Rep. 1 | Rep. 2 |
| N <sub>variants</sub> | 7,282    | 7,282  | 7,305  | 7,305  | 7,175  | 7,175  | 6,975  | 6,975  |
| median                | 103      | 174    | 187    | 179    | 160.5  | 160    | 130    | 123    |
| mean                  | 342.3    | 344.6  | 315.5  | 307.4  | 310.4  | 309.5  | 301.4  | 285.5  |
| >30-fold [%]          | 71.7     | 82.4   | 85.4   | 82.2   | 73.4   | 73.4   | 65.7   | 64.4   |
