# Supplementary material for: Determinants of trafficking, conduction, and disease within a K+ channel revealed through multiparametric deep mutational scanning
Source: eLife journal article supplement (doi:10.7554/elife.76903), 2022-05-31
Supplement: supp [file elife_poa_e76903_Figure_4_figure_supplement_3.pdf › elife_poa_e76903_Figure_4_figure_supplement_3.pdf]

## Function Fitness Assay - Mapped Reads

|              | Negative |        | Low    |        | Up     |        |
|--------------|----------|--------|--------|--------|--------|--------|
|              | Rep. 1   | Rep. 2 | Rep. 1 | Rep. 2 | Rep. 1 | Rep. 2 |
| N            | 7,168    | 7,168  | 7,284  | 7,284  | 7,320  | 7,320  |
| median       | 178      | 165    | 162    | 167    | 168    | 182    |
| mean         | 281.6    | 297.1  | 248.5  | 276.5  | 261.5  | 295.7  |
| >30-fold [%] | 79.4     | 79.5   | 82.7   | 80.9   | 83.3   | 83.5   |
