# Supplementary material for: Determinants of trafficking, conduction, and disease within a K+ channel revealed through multiparametric deep mutational scanning
Source: eLife journal article supplement (doi:10.7554/elife.76903), 2022-05-31
Supplement: supp [file elife_poa_e76903_Figure_7_figure_supplement_1.pdf › elife_poa_e76903_Figure_7_figure_supplement_1.pdf]

|                       |     | in ClinVar (not benign) |     |    |
|-----------------------|-----|-------------------------|-----|----|
| measured 'pathogenic' |     | LoS                     | LoF |    |
|                       | LoS | 82                      | 48  | 17 |
|                       | LoF | 33                      | 87  | 21 |
|                       |     | 17                      | 21  | 38 |
| p = 1.239e-08 (***)   |     |                         |     |    |
