# Supplementary material for: Determinants of trafficking, conduction, and disease within a K+ channel revealed through multiparametric deep mutational scanning
Source: eLife journal article supplement (doi:10.7554/elife.76903), 2022-05-31
Supplement: supp [file IRK_alignment_master_updated020521.xlsx]

## Sheet: Sheet1
Feature_ext	Feature	Part	Function	allosteric	allosteric_noGa	Master_POS	Kir2_1_FLAG_Resno_mus	Kir2_1_FLAG_Resid_mus	Kir2_1_Resno_mus	Kir2_1_Resid_mus	Kir21_group	Kir2_1_Resno_human	Kir2_1_Resid_human	Kir2_2_FLAG_Resno_human	Kir2_2_FLAG_Resid_human	Kir2_2_Resid_3SPI	Kir2_2_Resno_3SPI	Kir2_2_Resid_NC	Kir2_2_Resno_NC	Kir3_1_FLAG_Resno_human	Kir3_1_FLAG_Resid_human	Kir3_1_Resno_human	Kir3_1_Resid_human	Kir3_2_FLAG_Resno_human	Kir3_2_FLAG_Resid_human	GIRK2_Resno_4KFM	GIRK2_Resid_4KFM	Kir31_group	Kir6_2_FLAG_Resno_human	Kir6_2_FLAG_Resid_human	Kir6_2_Resno_5TWV	Kir_6_2_Resid_5TWV	Kir6_2_Resno_6C3O	Kir6_2_Resid_6C3O	Kir62_group
						1																		1	M
						2																		2	T
						3																		3	M
						4																		4	A
						5																		5	K
						6																		6	L
						7																		7	T
						8																		8	E
						9																		9	S
						10																		10	M
						11																		11	T									S
						12																		12	N									A
Nterm		sol				13	1	M	1	M		1	M							1	M			13	V	13								S
Nterm		sol				14	2	G	2	G		2	G	1	M					2	S			14	L	14								A
Nterm		sol				15	3	S	3	S		3	S	2	T				1	3	A			15	E	15								S
Nterm		sol				16	4	V	4	V		4	V	3	A				2	4	L			16	G	16								A
Nterm		sol				17	5	R	5	R		5	R	4	A				3	5	R			17	D	17			1	M	1	M	1	M
Nterm		sol				18	6	T	6	T		6	T	5	S				4	6	R			18	S	18			2	L	2	L	2	L
Nterm		sol				19	7	N	7	N		7	N	6	R				5	7	K			19	M	19			3	S	3	S	3	S
Nterm		sol				20	8	R	8	R		8	R	7	A				6	8	F			20	D	20			4	R	4	R	4	R
Nterm		sol				21	9	Y	9	Y		9	Y	8	N				7	9	G			21	Q	21			5	K	5	K	5	K
Nterm		sol				22	10	S	10	S		10	S	9	P				8	10	D			22	D	22			6	G	6	G	6	G
Nterm		sol				23	11	I	11	I		11	I	10	Y				9	11	D			23	V	23			7	I	7	I	7	I
Nterm		sol				24	12	V	12	V		12	V	11	S				10	12	Y			24	E	24			8	I	8	I	8	I
Nterm		sol				25	13	S	13	S		13	S	12	I				11	13	Q			25	S	25			9	P	9	P	9	P
Nterm		sol				26	14	S	14	S		14	S	13	V				12	14	V			26	P	26			10	E	10	E	10	E
Nterm		sol				27	15	E	15	E		15	E	14	S				13	15	V			27	V	27			11	E	11	E	11	E
Nterm		sol				28	16	E	16	E		16	E	15	S				14	16	T			28	A	28			12	Y	12	Y	12	Y
Nterm		sol				29	17	D	17	D		17	D	16	E				15	17	T			29	I	29			13	V	13	V	13	V
Nterm		sol				30	18	G	18	G		18	G	17	E				16	18	S			30	H	30			14	L	14	L	14	L
Nterm		sol				31	19	M	19	M		19	M	18	D				17	19	S			31	Q	31			15	T	15	T	15	T
Nterm		sol				32	20	K	20	K		20	K	19	G				18	20	S			32	P	32			16	R	16	R	16	R
Nterm		sol				33	21	L	21	L		21	L	20	L				19	21	G			33	K	33			17	L	17	L	17	L
Nterm		sol				34	22	A	22	A		22	A	21	H				20	22	S			34	L	34			18	A	18	A	18	A
Nterm		sol				35	23	T	23	T		23	T	22	L				21	23	G			35	P	35			19	E	19	E	19	E
Nterm		sol				36	24	M	24	M		24	M	23	V				22	24	L			36	K	36
Nterm		sol				37	25	A	25	A		25	A	24	T				23	25	Q			37	Q	37
Nterm		sol				38	26	V	26	V		26	V	25	M				24	26	P			38	A	38
Nterm		sol				39	27	A	27	A		27	A	26	S				25	27	Q			39	R	39
Nterm		sol				40	28	N	28	N		28	N	27	G				26	28	G			40	D	40
Nterm		sol				41	29	G	29	G		29	G	28	A				27	29	P			41	D	41
Nterm		sol				42	30	F	30	F		30	F	29	N				28	30	G			42	L	42
Nterm		sol				43	31	G	31	G		31	G	30	G				29	31	Q			43	P	43			20	D	20	D	20	D
Nterm		sol				44	32	N	32	N		32	N	31	F				30	32	G			44	R	44			21	P	21	P	21	P
Nterm		sol				45	33	G	33	G		33	G	32	G				31	33	P			45	H	45			22	A	22	T	22	A
Nterm		sol				46	34	K	34	K		34	K	33	N				32	34	Q			46	I	46			23	E	23	E	23	E
Nterm		sol				47	35	S	35	S		35	S	34	G				33	35	Q			47	S	47			24	P	24	P	24	P
Nterm		sol				48	36	K	36	K		36	K	35	K				34	36	Q			48	R	48			25	R	25	R	25	R
Nterm		sol				49	37	V	37	V		37	V	36	V				35	37	L			49	D	49			26	Y	26	Y	26	Y
Nterm		sol				50	38	H	38	H		38	H	37	H				36	38	V			50	R	50			27	R	27	R	27	R
Nterm		sol				51	39	T	39	T		39	T	38	T				37	39	P	32	D	51	T	51			28	A	28	T	28	A
Nterm		sol				52	40	R	40	R		40	R	39	R				38	40	K	40	K	52	K	52			29	R	29	R	29	R
Nterm		sol				53	41	Q	41	Q		41	Q	40	R				39	41	K	41	K	53	R	53			30	Q	30	E	30	Q
Nterm		sol				54	42	Q	42	Q		42	Q	41	R				40	42	K	42	K	54	K	54			31	R	31	R	31	R
Nterm		sol				55	43	C	43	C		43	C	42	C	C	41	C	41	43	R	43	R	55	I	55	I	1
Nterm		sol				56	44	R	44	R		44	R	43	R	R	42	R	42	44	Q	44	Q	56	Q	56	Q	1	32	R	32	R	32	R
Nterm		sol				57	45	S	45	S	3	45	S	44	N	N	43	N	43										33	A	33	A	33	A
Nterm		sol				58	46	R	46	R	1	46	R	45	R	R	44	R	44	45	R	45	R	57	R	57	R	1	34	R	34	R	34	R
Nterm		sol				59	47	F	47	F	2	47	F	46	F	F	45	F	45	46	F	46	F	58	Y	58	Y	2	35	F	35	F	35	F
Nterm		sol				60	48	V	48	V	2	48	V	47	V	V	46	V	46	47	V	47	V	59	V	59	V	2	36	V	36	V	36	V
Nterm		sol				61	49	K	49	K	2	49	K	48	K	K	47	K	47	48	D	48	D	60	R	60	R	1	37	S	37	S	37	S
Nterm		sol	ATP/PS	ATP1/PS	ATP1/PS	62	50	K	50	K	1	50	K	49	K	K	48	K	48	49	K	49	K	61	K	61	K	1	38	K	38	K	38	K
Nterm		sol				63	51	D	51	D	2	51	D	50	N	N	49	N	49	50	N	50	N	62	D	62	D	1	39	K	39	K	39	K
Nterm		sol				64	52	G	52	G	2	52	G	51	G	G	50	G	50	51	G	51	G	63	G	63	G	1	40	G	40	G	40	G
Nterm		sol	PIP2	PIP2	PIP2	65	53	H	53	H	1	53	H	52	Q	Q	51	Q	51	52	R	52	R	64	K	64	K	3	41	N	41	N	41	N
Nterm		sol				66	54	C	54	C	2	54	C	53	C	C	52	C	52	53	C	53	C	65	C	65	C	1	42	C	42	C	42	C
Nterm		sol				67	55	N	55	N	2	55	N	54	N	N	53	N	53	54	N	54	N	66	N	66	N	3	43	N	43	N	43	N
betaAB	betaA	sol				68	56	V	56	V	2	56	V	55	I	V	54	V	54	55	V	55	V	67	V	67	V	3	44	V	44	V	44	V
betaAB	betaA	sol				69	57	Q	57	Q	1	57	Q	56	E	E	55	E	55	56	Q	56	Q	68	H	68	H	3	45	A	45	A	45	A
betaAB	betaA	sol				70	58	F	58	F	1	58	F	57	F	F	56	F	56	57	H	57	H	69	H	69	H	3	46	H	46	H	46	H	1
betaAB	betaA	sol				71	59	I	59	I	1	59	I	58	A	T	57	T	57	58	G	58	G	70	G	70	G		47	K	47	K	47	K	1
betaAB		sol		pad	pad	72	60	N	60	N	1	60	N	59	N	N	58	N	58	59	N	59	N	71	N	71	N		48	N	48	N	48	N	1
betaAB		sol		pad	pad	73	61	V	61	V	1	61	V	60	M	M	59	M	59	60	L	60	L	72	V	72	V		49	I	49	I	49	I	2
betaAB		sol	ATP	ATP1	ATP1	74	62	G	62	G	3	62	G	61	D	D	60	D	60	61	G	61	G	73	R	73	R		50	R	50	R	50	R
betaAB		sol		pad	pad	75														62	S	62	S
alphaAB		tm		pad	pad	76	63	E	63	E		63	E	62	E	D	61	D	61	63	E	63	E	74	E	74	E		51	E	51	E	51	E	2
alphaAB		tm		pad	pad	77	64	K	64	K		64	K	63	K	K	62	K	62	64	T	64	T	75	T	75	T		52	Q	52	Q	52	Q
alphaAB	alphaA	tm		pad	pad	78	65	G	65	G		65	G	64	S	P	63	P	63										53	G	53	G	53	G
alphaAB	alphaA	tm		pad	pad	79	66	Q	66	Q		66	Q	65	Q	Q	64	Q	64	65	S	65	S	76	Y	76	Y	1
alphaAB	alphaA	tm		pad	pad	80	67	R	67	R		67	R	66	R	R	65	R	65	66	R	66	R	77	R	77	R	1	54	R	54	R	54	R
alphaAB	alphaA	tm		pad	pad	81	68	Y	68	Y		68	Y	67	Y	Y	66	Y	66	67	Y	67	Y	78	Y	78	Y	1	55	F	55	F	55	F	2
alphaAB	alphaA	tm		pad	pad	82	69	L	69	L		69	L	68	L	I	67	I	67	68	L	68	L	79	L	79	L	1	56	L	56	L	56	L	1
alphaAB	alphaA	tm		pad	pad	83	70	A	70	A		70	A	69	A	A	68	A	68	69	S	69	S	80	T	80	T	1	57	Q	57	Q	57	Q	1
alphaAB		tm		pad	pad	84	71	D	71	D		71	D	70	D	D	69	D	69	70	D	70	D	81	D	81	D	1	58	D	58	D	58	D	1
alphaAB	alphaB	tm		pad	pad	85	72	I	72	I	1	72	I	71	M	M	70	M	70	71	L	71	L	82	I	82	I	1	59	V	59	V	59	V	1
alphaAB	alphaB	tm		pad	pad	86	73	F	73	F	1	73	F	72	F	F	71	F	71	72	F	72	F	83	F	83	F	1	60	F	60	F	60	F	1
alphaAB	alphaB	tm		pad	pad	87	74	T	74	T	1	74	T	73	T	T	72	T	72	73	T	73	T	84	T	84	T	1	61	T	61	T	61	T	1
alphaAB	alphaB	tm		pad	pad	88	75	T	75	T	1	75	T	74	T	T	73	T	73	74	T	74	T	85	T	85	T	1	62	T	62	T	62	T	1
alphaAB	alphaB	tm		pad	pad	89	76	C	76	C	1	76	C	75	C	C	74	C	74	75	L	75	L	86	L	86	L	1	63	L	63	L	63	L	1
alphaAB	alphaB	tm		pad	pad	90	77	V	77	V	1	77	V	76	V	V	75	V	75	76	V	76	V	87	V	87	V	1	64	V	64	V	64	V	1
alphaAB	alphaB	tm		pad	pad	91	78	D	78	D	1	78	D	77	D	D	76	D	76	77	D	77	D	88	D	88	D	1	65	D	65	D	65	D	1
TM		tm		pad	pad	92	79	I	79	I	1	79	I	78	I	I	77	I	77	78	L	78	L	89	L	89	L	1	66	L	66	L	66	L	1
TM		tm	PIP2/PS	PIP2/PS	PIP2/PS	93	80	R	80	R	1	80	R	79	R	R	78	R	78	79	K	79	K	90	K	90	K	1	67	K	67	K	67	K	1
TM	M1	tm	PIP2	PIP2	PIP2	94	81	W	81	W	1	81	W	80	W	W	79	W	79	80	W	80	W	91	W	91	W	3	68	W	68	W	68	W
TM	M1	tm	PIP2/PS	PIP2/PS	PIP2/PS	95	82	R	82	R	1	82	R	81	R	R	80	R	80	81	R	81	R	92	R	92	R	1	69	P	69	P	69	P	1
TM	M1	tm		pad	pad	96	83	W	83	W	1	83	W	82	Y	Y	81	Y	81	82	W	82	W	93	F	93	F	1	70	H	70	H	70	H	1
TM	M1	tm				97	84	M	84	M	2	84	M	83	M	M	82	M	82	83	N	83	N	94	N	94	N	1	71	T	71	T	71	T	1
TM	M1	tm				98	85	L	85	L	2	85	L	84	L	L	83	L	83	84	L	84	L	95	L	95	L	1	72	L	72	L	72	L	1
TM	M1	tm				99	86	V	86	V	2	86	V	85	L	L	84	L	84	85	F	85	F	96	L	96	L	1	73	L	73	L	73	L	1
TM	M1	tm				100	87	I	87	I	2	87	I	86	I	L	85	L	85	86	I	86	I	97	I	97	I	2	74	I	74	I	74	I	2
TM	M1	tm				101	88	F	88	F	2	88	F	87	F	F	86	F	86	87	F	87	F	98	F	98	F	2	75	F	75	F	75	F	2
TM	M1	tm				102	89	C	89	C	2	89	C	88	S	S	87	S	87	88	I	88	I	99	V	99	V	2	76	T	76	T	76	T	2
TM	M1	tm				103	90	L	90	L	2	90	L	89	L	L	88	L	88	89	L	89	L	100	M	100	M	2	77	M	77	M	77	M	3
TM	M1	tm				104	91	A	91	A	2	91	A	90	A	A	89	A	89	90	T	90	T	101	V	101	V	2	78	S	78	S	78	S	2
TM	M1	tm				105	92	F	92	F	2	92	F	91	F	F	90	F	90	91	Y	91	Y	102	Y	102	Y	2	79	F	79	F	79	F	2
TM	M1	tm				106	93	V	93	V	2	93	V	92	L	L	91	L	91	92	T	92	T	103	T	103	T	2	80	L	80	L	80	L	2
TM	M1	tm				107	94	L	94	L	2	94	L	93	A	V	92	V	92	93	V	93	V	104	V	104	V	2	81	C	81	C	81	C	2
TM	M1	tm				108	95	S	95	S	2	95	S	94	S	S	93	S	93	94	A	94	A	105	T	105	T	2	82	S	82	S	82	S	2
TM	M1	tm				109	96	W	96	W	2	96	W	95	W	W	94	W	94	95	W	95	W	106	W	106	W	2	83	W	83	W	83	W	2
TM	M1	tm				110	97	L	97	L	2	97	L	96	L	L	95	L	95	96	L	96	L	107	L	107	L	2	84	L	84	L	84	L	2
TM	M1	tm				111	98	F	98	F	2	98	F	97	L	L	96	L	96	97	F	97	F	108	F	108	F	1	85	L	85	L	85	L	2
TM	M1	tm				112	99	F	99	F	2	99	F	98	F	F	97	F	97	98	M	98	M	109	F	109	F	2	86	F	86	F	86	F	2
TM	M1	tm				113	100	G	100	G	2	100	G	99	G	G	98	G	98	99	A	99	A	110	G	110	G	2	87	A	87	A	87	A	2
TM	M1	tm				114	101	C	101	C	1	101	C	100	I	L	99	L	99	100	S	100	S	111	M	111	M	2	88	M	88	M	88	M	2
TM	M1	tm				115	102	V	102	V	2	102	V	101	I	I	100	I	100	101	M	101	M	112	I	112	I	2	89	A	89	V	89	A	2
TM	M1	tm				116	103	F	103	F	2	103	F	102	F	F	101	F	101	102	W	102	W	113	W	113	W	2	90	W	90	W	90	W	2
TM	M1	tm				117	104	W	104	W	2	104	W	103	W	W	102	W	102	103	W	103	W	114	W	114	W	1	91	W	91	W	91	W	1
TM	M1	tm				118	105	L	105	L	1	105	L	104	V	L	103	L	103	104	V	104	V	115	L	115	L	1	92	L	92	L	92	L	2
TM	M1	tm				119	106	I	106	I	1	106	I	105	I	I	104	I	104	105	I	105	I	116	I	116	I	1	93	I	93	I	93	I	2
TM	M1	tm				120	107	A	107	A	2	107	A	106	A	A	105	A	105	106	A	106	A	117	A	117	A	1	94	A	94	A	94	A	2
TM	M1	tm				121	108	L	108	L	1	108	L	107	V	L	106	L	106	107	Y	107	Y	118	Y	118	Y	1	95	F	95	F	95	F	2
TM	M1	tm				122	109	L	109	L	1	109	L	108	A	I	107	I	107	108	T	108	T	119	I	119	I	1	96	A	96	A	96	A	2
TM	M1	tm				123	110	H	110	H	2	110	H	109	H	H	108	H	108	109	R	109	R	120	R	120	R	1	97	H	97	H	97	H	2
extra		tm				124	111	G	111	G	2	111	G	110	G	G	109	G	109	110	G	110	G	121	G	121	G	1	98	G	98	G	98	G	2
extra		tm				125	112	D	112	D	2	112	D	111	D	D	110	D	110	111	D	111	D	122	D	122	D		99	D	99	D	99	D	2
extra		tm				126	113	L	113	L	3	113	L	112	L	L	111	L	111	112	L	112	L	123	M	123	M		100	L	100	L	100	L	2
extra		tm				127																							101	Y
extra		tm				128	114	D	114	D	3	114	D	113	E	E	112	E	112	113	N	113	N	124	D	124	D		102	A	101	A	101	A
extra		tm				129										N	113	N	113	114	K	114	K	125	H	125	H		103	Y
extra		tm				130								114	P	P	114	P	114	115	D			126	I	126	I		104	M
extra		tm				131								115	D	G	115	G	115	116	Y								105	E
extra		tm				132	115	T	115	T		115	A	116	Y	G	116	G	116	117	K			127	E	127	E		106	K	102	P	102	P
extra		tm				133																								107	G
extra		tm				134																								108	I
extra		tm				135																								109	T
extra		tm				136																								110	D
extra		tm				137																								111	L
extra		tm				138																								112	A
extra		tm				139																								113	P
extra		tm				140	116	D							117	K					118	D								114	D
extra		tm				141	117	Y							118	D					119	D								115	Y
extra		tm				142	118	K							119	D					120	D								116	K
extra		tm				143	119	D							120	D					121	D								117	D
extra		tm				144	120	D							121	D					122	K								118	D
extra		tm				145	121	D							122	K					123	A	115	A						119	D
extra		tm				146	122	D							123	A					124	H	116	H						120	D
extra		tm				147	123	K							124	E														121	K
extra		tm				148	124	S	116	S		116	S	125	G	D	117	D	117	125	V	117	V	128	D	128	D		122	S	103	G	103	S
extra		tm				149	125	K	117	K	1	117	K	126	R	D	118	D	118	126	G	118	G	129	P	129	P		123	E	104	E	104	E
extra		tm				150	126	V	118	V	1	118	E	127	G	T	119	T	119	127	N	119	N	130	S	130	S		124	G	105	G	105	G
extra		tm				151	127	S	119	S	2	119	G	128	R	F	120	F	120	128	Y	120	Y	131	W	131	W		125	T	106	T	106	T
extra		tm				152	128	K	120	K	2	120	K	129	T	K	121	K	121	129	T	121	T	132	T	132	T		126	A	107	N	107	A
extra		tm				153	129	A	121	A	2	121	A	130	P	P	122	P	122	130	P	122	P	133	P	133	P		127	E	108	V	108	E
extra		tm				154																							128	P	109	P	109	P
extra		tm				155	130	C	122	C	2	122	C	131	C	C	123	C	123	131	C	123	C	134	C	134	C	1	129	C	110	C	110	C
extra		tm				156	131	V	123	V	2	123	V	132	V	V	124	V	124	132	V	124	V	135	V	135	V	1	130	V	111	V	111	V
extra		tm				157	132	S	124	S	2	124	S	133	M	L	125	L	125	133	A	125	A	136	T	136	T	1	131	T	112	T	112	T	1
extra		tm				158	133	E	125	E	2	125	E	134	Q	Q	126	Q	126	134	N	126	N	137	N	137	N	2	132	S	113	S	113	S	1
extra		tm				159	134	V	126	V	2	126	V	135	V	V	127	V	127	135	V	127	V	138	L	138	L	2	133	I	114	I	114	I	1
extra		tm				160	135	N	127	N	2	127	N	136	H	N	128	N	128	136	Y	128	Y	139	N	139	N	2	134	H	115	H	115	H
Pore/Filter	Pore Helix	tm				161	136	S	128	S	2	128	S	137	G	G	129	G	129	137	N	129	N	140	G	140	G	2	135	S	116	S	116	S
Pore/Filter	Pore Helix	tm				162	137	F	129	F	2	129	F	138	F	F	130	F	130	138	F	130	F	141	F	141	F	2	136	F	117	F	117	F
Pore/Filter	Pore Helix	tm				163	138	T	130	T	2	130	T	139	M	V	131	V	131	139	P	131	P	142	V	142	V	2	137	S	118	S	118	S
Pore/Filter	Pore Helix	tm				164	139	A	131	A	2	131	A	140	A	A	132	A	132	140	S	132	S	143	S	143	S	2	138	S	119	S	119	S
Pore/Filter	Pore Helix	tm				165	140	A	132	A	2	132	A	141	A	A	133	A	133	141	A	133	A	144	A	144	A	2	139	A	120	A	120	A
Pore/Filter	Pore Helix	tm				166	141	F	133	F	2	133	F	142	F	F	134	F	134	142	F	134	F	145	F	145	F	2	140	F	121	F	121	F
Pore/Filter	Pore Helix	tm				167	142	L	134	L	2	134	L	143	L	L	135	L	135	143	L	135	L	146	L	146	L	2	141	L	122	L	122	L
Pore/Filter	Pore Helix	tm				168	143	F	135	F	2	135	F	144	F	F	136	F	136	144	F	136	F	147	F	147	F	2	142	F	123	F	123	F	1
Pore/Filter	Pore Helix	tm				169	144	S	136	S	2	136	S	145	S	S	137	S	137	145	F	137	F	148	S	148	S	2	143	S	124	S	124	S	1
Pore/Filter	Pore Helix	tm				170	145	I	137	I	2	137	I	146	I	I	138	I	138	146	I	138	I	149	I	149	I	2	144	I	125	I	125	I	1
Pore/Filter	Pore Helix	tm				171	146	E	138	E	2	138	E	147	E	E	139	E	139	147	E	139	E	150	E	150	E	2	145	E	126	E	126	E	1
Pore/Filter	Pore Helix	tm				172	147	T	139	T	2	139	T	148	T	T	140	T	140	148	T	140	T	151	T	151	T	2	146	V	127	V	127	V	1
Pore/Filter	Pore Helix	tm				173	148	Q	140	Q	2	140	Q	149	Q	Q	141	Q	141	149	E	141	E	152	E	152	E	2	147	Q	128	Q	128	Q	1
Pore/Filter	Pore Helix	tm				174	149	T	141	T	2	141	T	150	T	T	142	T	142	150	A	142	A	153	T	153	T	2	148	V	129	V	129	V	1
Pore/Filter	Filter	tm				175	150	T	142	T	2	142	T	151	T	T	143	T	143	151	T	143	T	154	T	154	T	2	149	T	130	T	130	T	2
Pore/Filter	Filter	tm				176	151	I	143	I	2	143	I	152	I	I	144	I	144	152	I	144	I	155	I	155	I	2	150	I	131	I	131	I	1
Pore/Filter	Filter	tm				177	152	G	144	G	2	144	G	153	G	G	145	G	145	153	G	145	G	156	G	156	G	2	151	G	132	G	132	G	2
Pore/Filter	Filter	tm				178	153	Y	145	Y	2	145	Y	154	Y	Y	146	Y	146	154	Y	146	Y	157	Y	157	Y	2	152	F	133	F	133	F	2
Pore/Filter	Filter	tm				179	154	G	146	G	2	146	G	155	G	G	147	G	147	155	G	147	G	158	G	158	G	2	153	G	134	G	134	G	3
Pore/Filter		tm				180	155	F	147	F	2	147	F	156	L	F	148	F	148	156	Y	148	Y	159	Y	159	Y	1	154	G	135	G	135	G	2
Pore/Filter		tm				181	156	R	148	R	2	148	R	157	R	R	149	R	149	157	R	149	R	160	R	160	R	2	155	R	136	R	136	R	2
Pore/Filter		tm				182	157	C	149	C	2	149	C	158	C	C	150	C	150	158	Y	150	Y	161	V	161	V	2	156	M	137	M	137	M	1
Pore/Filter		tm				183	158	V	150	V	2	150	V	159	V	V	151	V	151	159	I	151	I	162	I	162	I	2	157	V	138	V	138	V	2
Pore/Filter		tm				184	159	T	151	T	2	151	T	160	T	T	152	T	152	160	T	152	T	163	T	163	T	1	158	T	139	T	139	T	1
Pore/Filter		tm				185	160	D	152	D	2	152	D	161	E	E	153	E	153	161	D	153	D	164	D	164	D	1	159	E	140	E	140	E	1
Pore/Filter		tm				186	161	E	153	E	2	153	E	162	E	E	154	E	154	162	K	154	K	165	K	165	K	1	160	E	141	E	141	E	2
TM	M2	tm				187	162	C	154	C	2	154	C	163	C	C	155	C	155	163	C	155	C	166	C	166	C	1	161	C	142	C	142	C	2
TM	M2	tm				188	163	P	155	P	2	155	P	164	P	P	156	P	156	164	P	156	P	167	P	167	P	1	162	P	143	P	143	P	2
TM	M2	tm				189	164	I	156	I		156	I	165	V	L	157	L	157	165	E	157	E	168	E	168	E	1	163	L	144	L	144	L	2
TM	M2	tm				190	165	A	157	A		157	A	166	A	A	158	A	158	166	G	158	G	169	G	169	G	1	164	A	145	A	145	A	2
TM	M2	tm				191	166	V	158	V		158	V	167	V	V	159	V	159	167	I	159	I	170	I	170	I	2	165	I	146	I	146	I	2
TM	M2	tm				192	167	F	159	F		159	F	168	F	F	160	F	160	168	I	160	I	171	I	171	I	2	166	L	147	L	147	L	2
TM	M2	tm				193	168	M	160	M		160	M	169	M	M	161	M	161	169	L	161	L	172	L	172	L	2	167	I	148	I	148	I	2
TM	M2	tm				194	169	V	161	V		161	V	170	V	V	162	V	162	170	F	162	F	173	L	173	L	2	168	L	149	L	149	L	2
TM	M2	tm				195	170	V	162	V	2	162	V	171	V	V	163	V	163	171	L	163	L	174	L	174	L	2	169	I	150	I	150	I	2
TM	M2	tm				196	171	F	163	F	2	163	F	172	A	V	164	V	164	172	F	164	F	175	I	175	I	2	170	V	151	V	151	V	2
TM	M2	tm				197	172	Q	164	Q	2	164	Q	173	Q	Q	165	Q	165	173	Q	165	Q	176	Q	176	Q	2	171	Q	152	Q	152	Q	2
TM	M2	tm				198	173	S	165	S	2	165	S	174	S	S	166	S	166	174	S	166	S	177	S	177	S	2	172	N	153	N	153	N	2
TM	M2	tm				199	174	I	166	I	2	166	I	175	I	I	167	I	167	175	I	167	I	178	V	178	V	2	173	I	154	I	154	I	2
TM	M2	tm				200	175	V	167	V	2	167	V	176	V	V	168	V	168	176	L	168	L	179	L	179	L	2	174	V	155	V	155	V	2
TM	M2	tm				201	176	G	168	G	2	168	G	177	G	G	169	G	169	177	G	169	G	180	G	180	G	2	175	G	156	G	156	G	2
TM	M2	tm				202	177	C	169	C	2	169	C	178	C	C	170	C	170	178	S	170	S	181	S	181	S	2	176	L	157	L	157	L	2
TM	M2	tm				203	178	I	170	I	2	170	I	179	I	I	171	I	171	179	I	171	I	182	I	182	I	2	177	M	158	M	158	M	1
TM	M2	tm				204	179	I	171	I	2	171	I	180	I	I	172	I	172	180	V	172	V	183	V	183	V	1	178	I	159	I	159	I	1
TM	M2	tm				205	180	D	172	D	2	172	D	181	D	D	173	D	173	181	D	173	D	184	N	184	N	1	179	N	160	N	160	N	1
TM	M2	tm				206	181	A	173	A	2	173	A	182	S	S	174	S	174	182	A	174	A	185	A	185	A	1	180	A	161	A	161	A	1
TM	M2	tm				207	182	F	174	F	2	174	F	183	F	F	175	F	175	183	F	175	F	186	F	186	F	1	181	I	162	I	162	I	1
TM	M2	tm				208	183	I	175	I	2	175	I	184	M	M	176	M	176	184	L	176	L	187	M	187	M	1	182	M	163	M	163	M	1
TM	M2	tm	inner gate			209	184	I	176	I	2	176	I	185	I	I	177	I	177	185	I	177	I	188	V	188	V	2	183	L	164	L	164	L	1
TM	M2	tm				210	185	G	177	G	2	177	G	186	G	G	178	G	178	186	G	178	G	189	G	189	G	1	184	G	165	G	165	G	1
TM	M2	tm				211	186	A	178	A	2	178	A	187	A	A	179	A	179	187	C	179	C	190	C	190	C	1	185	C	166	C	166	C	1
TM	M2	tm				212	187	V	179	V	2	179	V	188	I	I	180	I	180	188	M	180	M	191	M	191	M	1	186	I	167	I	167	I	1
TM	M2	tm	inner gate			213	188	M	180	M	2	180	M	189	M	M	181	M	181	189	F	181	F	192	F	192	F	1	187	F	168	F	168	F	1
TM	M2	tm		pad	pad	214	189	A	181	A	2	181	A	190	A	A	182	A	182	190	I	182	I	193	V	193	V	1	188	M	169	M	169	M	1
TM	M2	tm	PIP2/PS	PIP2/PS	PIP2/PS	215	190	K	182	K	1	182	K	191	K	K	183	K	183	191	K	183	K	194	K	194	K	2	189	K	170	K	170	K	1
TM	M2	tm	PS	PS	PS	216	191	M	183	M		183	M	192	M	M	184	M	184	192	M	184	M	195	I	195	I		190	T	171	T	171	T
TM	M2	tm		pad	pad	217	192	A	184	A	1	184	A	193	A	A	185	A	185	193	S	185	S	196	S	196	S	1	191	A	172	A	172	A	2
alphaF		tm	PIP2/PS	PIP2/PS	PIP2/PS	218	193	K	185	K	2	185	K	194	R	R	186	R	186	194	Q	186	Q	197	Q	197	Q	2	192	Q	173	Q	173	Q	2
alphaF	alphaF	tm	PIP2	PIP2	PIP2	219	194	P	186	P	1	186	P	195	P	P	187	P	187	195	P	187	P	198	P	198	P	1	193	A	174	A	174	A
alphaF	alphaF	tm	PIP2	PIP2	PIP2	220	195	K	187	K	1	187	K	196	K	K	188	K	188	196	K	188	K	199	K	199	K	2	194	H	175	H	175	H	1
alphaF	alphaF	tm	PIP2/PS	PIP2/PS	PIP2/PS	221	196	K	188	K	3	188	K	197	K	K	189	K	189	197	K	189	K	200	K	200	K	2	195	R	176	R	176	R	2
alphaF	alphaF	tm		pad	pad	222	197	R	189	R	1	189	R	198	R	R	190	R	190	198	R	190	R	201	R	201	R	1	196	R	177	R	177	R	1
alphaF	alphaF	tm				223	198	N	190	N	3	190	N	199	A	A	191	A	191	199	A	191	A	202	A	202	A	1	197	A	178	A	178	A	1
alphaF	alphaF	tm				224	199	E	191	E	1	191	E	200	Q	Q	192	Q	192	200	E	192	E	203	E	203	E	1	198	E	179	E	179	E	1
alphaF	alphaF	tm				225	200	T	192	T	3	192	T	201	T	T	193	T	193	201	T	193	T	204	T	204	T	1	199	T	180	T	180	T	1
betaBC	betaB1	sol		pad	pad	226	201	L	193	L	2	193	L	202	L	L	194	L	194	202	L	194	L	205	L	205	L	1	200	L	181	L	181	L	2
betaBC	betaB1	sol	ATP	ATP2	ATP2	227	202	V	194	V	2	194	V	203	L	L	195	L	195	203	M	195	M	206	V	206	V	1	201	I	182	I	182	I	2
betaBC	betaB1	sol		pad	pad	228	203	F	195	F	2	195	F	204	F	F	196	F	196	204	F	196	F	207	F	207	F	2	202	F	183	F	183	F	2
betaBC		sol		pad	pad	229	204	S	196	S	2	196	S	205	S	S	197	S	197	205	S	197	S	208	S	208	S	2	203	S	184	S	184	S	2
betaBC		sol	ATP	ATP1	ATP1	230	205	H	197	H	3	197	H	206	H	H	198	H	198	206	E	198	E	209	T	209	T	1	204	K	185	K	185	K
betaBC		sol		pad	pad	231	206	N	198	N	2	198	N	207	N	N	199	N	199	207	H	199	H	210	H	210	H	1	205	H	186	H	186	H	2
betaBC	betaB2	sol				232	207	A	199	A	3	199	A	208	A	A	200	A	200	208	A	200	A	211	A	211	A	1	206	A	187	A	187	A	1
betaBC	betaB2	sol				233	208	V	200	V	3	200	V	209	V	V	201	V	201	209	V	201	V	212	V	212	V	2	207	V	188	V	188	V	1
betaBC	betaB2	sol				234	209	I	201	I	2	201	I	210	V	V	202	V	202	210	I	202	I	213	I	213	I	2	208	I	189	I	189	I	1
betaBC	betaB2	sol				235	210	A	202	A	3	202	A	211	A	A	203	A	203	211	S	203	S	214	S	214	S	2	209	A	190	T	190	A	1
betaBC	betaB2	sol				236	211	M	203	M	3	203	M	212	L	M	204	M	204	212	M	204	M	215	M	215	M	2	210	L	191	P	191	L	1
betaBC	betaB2	sol				237	212	R	204	R	3	204	R	213	S	R	205	R	205	213	R	205	R	216	R	216	R	2	211	R	192	R	192	R	3
betaBC		sol				238	213	D	205	D	3	205	D	214	D	D	206	D	206	214	D	206	D	217	D	217	D	3	212	H	193	H	193	H	2
betaBC		sol				239	214	G	206	G	3	206	G	215	G	G	207	G	207	215	G	207	G	218	G	218	G	1	213	G	194	G	194	G	2
betaBC	betaC	sol				240	215	K	207	K	3	207	K	216	K	K	208	K	208	216	K	208	K	219	K	219	K	1	214	R	195	R	195	R	2
betaBC	betaC	sol				241	216	L	208	L	2	208	L	217	L	L	209	L	209	217	L	209	L	220	L	220	L	2	215	L	196	L	196	L	1
betaBC	betaC	sol				242	217	C	209	C	2	209	C	218	C	C	210	C	210	218	T	210	T	221	C	221	C	2	216	C	197	C	197	C	1
betaBC	betaC	sol				243	218	L	210	L	2	210	L	219	L	L	211	L	211	219	L	211	L	222	L	222	L	2	217	F	198	F	198	F	1
betaBC	betaC	sol				244	219	M	211	M	2	211	M	220	M	M	212	M	212	220	M	212	M	223	M	223	M	2	218	M	199	M	199	M	1
betaBC	betaC	sol				245	220	W	212	W	2	212	W	221	W	W	213	W	213	221	F	213	F	224	F	224	F	2	219	L	200	L	200	L	2
betaBC	betaC	sol				246	221	R	213	R		213	R	222	R	R	214	R	214	222	R	214	R	225	R	225	R	2	220	R	201	R	201	R	2
betaBC	betaC	sol		pad	pad	247	222	V	214	V	2	214	V	223	V	V	215	V	215	223	V	215	V	226	V	226	V	1	221	V	202	V	202	V	2
betaBC	betaC	sol		pad	pad	248	223	G	215	G	2	215	G	224	G	G	216	G	216	224	G	216	G	227	G	227	G	1	222	G	203	G	203	G	1
betaBC	betaC	sol		pad	pad	249	224	N	216	N	2	216	N	225	N	N	217	N	217	225	N	217	N	228	D	228	D	1	223	D	204	D	204	D	1
betaBC		sol	ATP	ATP2	ATP2	250	225	L	217	L	2	217	L	226	L	L	218	L	218	226	L	218	L	229	L	229	L	1	224	L	205	L	205	L	1
betaBC		sol		pad	pad	251	226	R	218	R	1	218	R	227	R	R	219	R	219	227	R	219	R	230	R	230	R	1	225	R	206	R	206	R	2
betaBC		sol	PIP2/PS	PIP2/PS	PIP2/PS	252	227	K	219	K		219	K	228	K	K	220	K	220	228	N	220	N	231	N	231	N		226	K	207	K	207	K
betaBC		sol		pad	pad	253	228	S	220	S	3	220	S	229	S	S	221	S	221	229	S	221	S	232	S	232	S	1	227	S	208	S	208	S	1
betaBC		sol		pad	pad	254	229	H	221	H	1	221	H	230	H	H	222	H	222	230	H	222	H	233	H	233	H	1	228	M	209	M	209	M	2
betaBC		sol		pad	pad	255	230	L	222	L	1	222	L	231	I	I	223	I	223	231	M	223	M	234	I	234	I	2	229	I	210	I	210	I	3
betaBC		sol				256	231	V	223	V	2	223	V	232	V	V	224	V	224	232	V	224	V	235	V	235	V	2	230	I	211	I	211	I	2
betaBC		sol				257	232	E	224	E	2	224	E	233	E	E	225	E	225	233	S	225	S	236	E	236	E	2	231	S	212	S	212	S	1
betaBC		sol				258	233	A	225	A	2	225	A	234	A	A	226	A	226	234	A	226	A	237	A	237	A	2	232	A	213	A	213	A	3
betaDE	betaD1	sol				259	234	H	226	H	2	226	H	235	H	H	227	H	227	235	Q	227	Q	238	S	238	S	2	233	T	214	T	214	T	3
betaDE	betaD1	sol				260	235	V	227	V	2	227	V	236	V	V	228	V	228	236	I	228	I	239	I	239	I	2	234	I	215	I	215	I	2
betaDE	betaD1	sol				261	236	R	228	R	2	228	R	237	R	R	229	R	229	237	R	229	R	240	R	240	R	2	235	H	216	H	216	H	2
betaDE	betaD1	sol				262	237	A	229	A	2	229	A	238	A	A	230	A	230	238	C	230	C	241	A	241	A	2	236	M	217	M	217	M	1
betaDE	betaD1	sol				263	238	Q	230	Q	2	230	Q	239	Q	Q	231	Q	231	239	K	231	K	242	K	242	K	2	237	Q	218	Q	218	Q	1
betaDE	betaD1	sol				264	239	L	231	L	2	231	L	240	L	L	232	L	232	240	L	232	L	243	L	243	L	2	238	V	219	V	219	V	1
betaDE	betaD1	sol				265	240	L	232	L	2	232	L	241	I	I	233	I	233	241	L	233	L	244	I	244	I	2	239	V	220	V	220	V	1
betaDE	betaD1	sol		pad	pad	266	241	K	233	K	1	233	K	242	K	K	234	K	234	242	K	234	K	245	K	245	K	2	240	R	221	R	221	R	2
betaDE		sol	Gbg	Gbg	Gbg	267	242	S	234	S	1	234	S	243	P	P	235	P	235	243	S	235	S	246	S	246	S	3	241	K	222	K	222	K	3
betaDE	betaD2	sol	pad	pad	pad	268	243	R	235	R	1	235	R	244	R	R	236	R	236	244	R	236	R	247	K	247	K	3	242	T	223	T	223	T	3
betaDE	betaD2	sol	Gbg	Gbg	Gbg	269	244	I	236	I	1	236	I	245	V	I	237	I	237	245	Q	237	Q	248	Q	248	Q	3	243	T	224	T	224	T	3
betaDE	betaD2	sol	Gbg	Gbg	Gbg	270	245	T	237	T	1	237	T	246	T	T	238	T	238	246	T	238	T	249	T	249	T	1	244	S	225	S	225	S	3
betaDE		sol	Gbg	Gbg	Gbg	271	246	S	238	S	1	238	S	247	E	E	239	E	239	247	P	239	P	250	S	250	S	1	245	P	226	P	226	P	3
betaDE		sol	Gbg	Gbg	Gbg	272	247	E	239	E	1	239	E	248	E	E	240	E	240	248	E	240	E	251	E	251	E	1	246	E	227	E	227	E	3
betaDE		sol	Gbg	Gbg	Gbg	273	248	G	240	G	1	240	G	249	G	G	241	G	241	249	G	241	G	252	G	252	G	1	247	G	228	G	228	G	2
betaDE	betaE1	sol	Ga	Ga	Ga	274	249	E	241	E	1	241	E	250	E	E	242	E	242	250	E	242	E	253	E	253	E	3	248	E	229	E	229	E	2
betaDE	betaE1	sol	Gbg	Gbg	Gbg	275	250	Y	242	Y	1	242	Y	251	Y	Y	243	Y	243	251	F	243	F	254	F	254	F	1	249	V	230	V	230	V	1
betaDE	betaE1	sol	pad	pad	pad	276	251	I	243	I	1	243	I	252	I	I	244	I	244	252	L	244	L	255	I	255	I	1	250	V	231	V	231	V	3
betaDE		sol	Gbg	Gbg	Gbg	277	252	P	244	P	1	244	P	253	P	P	245	P	245	253	P	245	P	256	P	256	P	1	251	P	232	P	232	P	2
betaDE		sol		pad	pad	278	253	L	245	L	1	245	L	254	L	L	246	L	246	254	L	246	L	257	L	257	L	2	252	L	233	L	233	L	3
betaDE	betaE2	sol				279	254	D	246	D	2	246	D	255	D	D	247	D	247	255	D	247	D	258	N	258	N	2	253	H	234	H	234	H	1
betaDE	betaE2	sol				280	255	Q	247	Q	2	247	Q	256	Q	Q	248	Q	248	256	Q	248	Q	259	Q	259	Q	2	254	Q	235	Q	235	Q	1
betaDE	betaE2	sol				281	256	I	248	I	2	248	I	257	I	I	249	I	249	257	L	249	L	260	S	260	T	1	255	V	236	V	236	V	1
betaDE	betaE2	sol				282	257	D	249	D	2	249	D	258	D	D	250	D	250	258	E	250	E	261	D	261	D	1	256	D	237	D	237	D	1
betaDE		sol				283	258	I	250	I	2	250	I	259	I	I	251	I	251	259	L	251	L	262	I	262	I	1	257	I	238	I	238	I	2
betaDE		sol				284	259	N	251	N	2	251	N	260	D	D	252	D	252	260	D	252	D	263	N	263	N	1	258	P	239	P	239	P	2
betaDE		sol				285	260	V	252	V	2	252	V	261	V	V	253	V	253	261	V	253	V	264	V	264	V	1	259	M	240	M	240	M	3
betaDE		sol				286	261	G	253	G	1	253	G	262	G	G	254	G	254	262	G	254	G	265	G	265	G	1	260	E	241	E	241	E	3
betaDE		sol				287	262	F	254	F	1	254	F	263	F	F	255	F	255	263	F	255	F	266	Y	266	Y	1	261	N	242	N	242	N	3
betaDE		sol				288	263	D	255	D	3	255	D	264	D	D	256	D	256	264	S	256	S	267	Y	267	Y	1	262	G	243	G	243	G	3
betaDE		sol				289	264	S	256	S	1	256	S	265	K	K	257	K	257	265	T	257	T	268	T	268	T	1	263	V	244	V	244	V	3
betaDE		sol				290	265	G	257	G	3	257	G	266	G	G	258	G	258	266	G	258	G	269	G	269	G	1	264	G	245	G	245	G	3
betaG		sol				291	266	I	258	I	3	258	I	267	L	L	259	L	259	267	A	259	A	270	D	270	D	1	265	G	246	G	246	G	3
betaG		sol				292	267	D	259	D	3	259	D	268	D	D	260	D	260	268	D	260	D	271	D	271	D	1	266	N	247	N	247	N	3
betaG		sol		pad	pad	293	268	R	260	R	1	260	R	269	R	R	261	R	261	269	Q	261	Q	272	R	272	R	2	267	S	248	S	248	S	3
betaG		sol	Gbg	Gbg	Gbg	294	269	I	261	I	1	261	I	270	I	I	262	I	262	270	L	262	L	273	L	273	L	2	268	I	249	I	249	I	1
betaG		sol		pad	pad	295	270	F	262	F	2	262	F	271	F	F	263	F	263	271	F	263	F	274	F	274	F	2	269	F	250	F	250	F	3
betaG		sol				296	271	L	263	L	2	263	L	272	L	L	264	L	264	272	L	264	L	275	L	275	L	1	270	L	251	L	251	L	3
betaG		sol				297	272	V	264	V	2	264	V	273	V	V	265	V	265	273	V	265	V	276	V	276	V	2	271	V	252	V	252	V	2
betaG		sol				298	273	S	265	S	2	265	S	274	S	S	266	S	266	274	S	266	S	277	S	277	S	2	272	A	253	A	253	A	2
betaG		sol				299	274	P	266	P	2	266	P	275	P	P	267	P	267	275	P	267	P	278	P	278	P	2	273	P	254	P	254	P	2
betaG	betaG	sol				300	275	I	267	I	2	267	I	276	I	I	268	I	268	276	L	268	L	279	L	279	L	2	274	L	255	L	255	L	2
betaG	betaG	sol				301	276	T	268	T	2	268	T	277	T	T	269	T	269	277	T	269	T	280	I	280	I	2	275	I	256	I	256	I	2
betaG	betaG	sol				302	277	I	269	I	2	269	I	278	I	I	270	I	270	278	I	270	I	281	I	281	I	2	276	I	257	I	257	I	2
betaG	betaG	sol				303	278	V	270	V	2	270	V	279	L	L	271	L	271	279	C	271	C	282	S	282	S	2	277	Y	258	Y	258	Y	2
betaG	betaG	sol				304	279	H	271	H	2	271	H	280	H	H	272	H	272	280	H	272	H	283	H	283	H	2	278	H	259	H	259	H	2
betaG	betaG	sol				305	280	E	272	E		272	E	281	E	E	273	E	273	281	V	273	V	284	E	284	E	2	279	V	260	V	260	V	2
betaG		sol				306	281	I	273	I	2	273	I	282	I	I	274	I	274	282	I	274	I	285	I	285	I	2	280	I	261	I	261	I	2
betaG		sol				307	282	D	274	D	2	274	D	283	D	N	275	N	275	283	D	275	D	286	N	286	N	2	281	D	262	D	262	D	1
betaG		sol				308	283	E	275	E	2	275	E	284	E	E	276	E	276	284	A	276	A	287	Q	287	Q	2	282	A	263	S	263	A	1
betaG		sol				309	284	D	276	D	2	276	D	285	A	D	277	D	277	285	K	277	K	288	Q	288	Q	2	283	N	264	N	264	N	1
betaG		sol				310	285	S	277	S	2	277	S	286	S	S	278	S	278	286	S	278	S	289	S	289	S	2	284	S	265	S	265	S	2
alphaG		sol				311	286	P	278	P	2	278	P	287	P	P	279	P	279	287	P	279	P	290	P	290	P	2	285	P	266	P	266	P	2
alphaG		sol				312	287	L	279	L	2	279	L	288	L	L	280	L	280	288	F	280	F	291	F	291	F	2	286	L	267	L	267	L	2
alphaG		sol				313	288	Y	280	Y	2	280	Y	289	F	F	281	F	281	289	Y	281	Y	292	W	292	W	2	287	Y	268	Y	268	Y	2
alphaG		sol				314	289	D	281	D	2	281	D	290	G	G	282	G	282	290	D	282	D	293	E	293	E	1	288	D	269	D	269	D	2
alphaG		sol				315	290	L	282	L	2	282	L	291	I	I	283	I	283	291	L	283	L	294	I	294	I	1	289	L	270	L	270	L	2
alphaG	alphaG	sol				316	291	S	283	S	2	283	S	292	S	S	284	S	284	292	S	284	S	295	S	295	S	1	290	A	271	A	271	A	2
alphaG	alphaG	sol				317	292	K	284	K	2	284	K	293	R	R	285	R	285	293	Q	285	Q	296	K	296	K	1	291	P	272	P	272	P	2
alphaG	alphaG	sol				318	293	Q	285	Q	2	285	Q	294	Q	Q	286	Q	286	294	R	286	R	297	A	297	A	1	292	S	273	S	273	S	2
alphaG	alphaG	sol				319	294	D	286	D	2	286	D	295	D	D	287	D	287	295	S	287	S	298	Q	298	Q	1	293	D	274	D	274	D	3
alphaG	alphaG	sol				320	295	I	287	I	2	287	I	296	L	L	288	L	288	296	M	288	M	299	L	299	L	1	294	L	275	L	275	L	3
alphaG	alphaG	sol				321																							295	H	276	H	276	H	3
alphaG	alphaG	sol				322	296	D	288	D	1	288	D	297	E	E	289	E	289	297	Q	289	Q	300	P	300	P	1	296	H	277	H	277	H	3
alphaG	alphaG	sol				323	297	N	289	N	1	289	N	298	T	T	290	T	290	298	T	290	T	301	K	301	K	1	297	H	278	H	278	H	3
alphaG		sol				324	298	A	290	A	1	290	A	299	D	D	291	D	291	299	E	291	E	302	E	302	E	1	298	Q	279	Q	279	Q	3
alphaG		sol				325	299	D	291	D	1	291	D	300	D	D	292	D	292	300	Q	292	Q	303	E	303	E	1	299	D	280	D	280	D	3
betaHI		sol				326	300	F	292	F	2	292	F	301	F	F	293	F	293	301	F	293	F	304	L	304	L	1	300	L	281	L	281	L	1
betaHI	betaH	sol				327	301	E	293	E	2	293	E	302	E	E	294	E	294	302	E	294	E	305	E	305	E	2	301	E	282	E	282	E	1
betaHI	betaH	sol				328	302	I	294	I	2	294	I	303	I	I	295	I	295	303	V	295	I	306	I	306	I	2	302	I	283	I	283	I	1
betaHI	betaH	sol				329	303	V	295	V	2	295	V	304	V	V	296	V	296	304	V	296	V	307	V	307	V	2	303	I	284	I	284	I	1
betaHI	betaH	sol				330	304	V	296	V	2	296	V	305	V	V	297	V	297	305	V	297	V	308	V	308	V	2	304	V	285	V	285	V	1
betaHI	betaH	sol				331	305	I	297	I	2	297	I	306	I	I	298	I	298	306	I	298	I	309	I	309	I	2	305	I	286	I	286	I	2
betaHI	betaH	sol				332	306	L	298	L	2	298	L	307	L	L	299	L	299	307	L	299	L	310	L	310	L	2	306	L	287	L	287	L	1
betaHI	betaH	sol				333	307	E	299	E	2	299	E	308	E	E	300	E	300	308	E	300	E	311	E	311	E	1	307	E	288	E	288	E	1
betaHI	betaH	sol				334	308	G	300	G	2	300	G	309	G	G	301	G	301	309	G	301	G	312	G	312	G	1	308	G	289	G	289	G	1
betaHI	betaH	sol	Gloop			335	309	M	301	M	2	301	M	310	M	M	302	M	302	310	I	302	I	313	I	313	M	1	309	V	290	V	290	V
betaHI		sol				336	310	V	302	V	2	302	V	311	V	V	303	V	303	311	V	303	V	314	V	314	V	1	310	V	291	V	291	V	1
betaHI		sol				337	311	E	303	E	2	303	E	312	E	E	304	E	304	312	E	304	E	315	E	315	E	1	311	E	292	E	292	E	1
betaHI		sol				338	312	A	304	A	1	304	A	313	A	A	305	A	305	313	T	305	T	316	A	316	A	1	312	T	293	T	293	T	1
betaHI		sol				339	313	T	305	T	2	305	T	314	T	T	306	T	306	314	T	306	T	317	T	317	T	2	313	T	294	T	294	T	1
betaHI		sol	Gloop			340	314	A	306	A	2	306	A	315	A	A	307	A	307	315	G	307	G	318	G	318	G	2	314	G	295	G	295	G	1
betaHI		sol	Gloop			341	315	M	307	M	2	307	M	316	M	M	308	M	308	316	M	308	M	319	M	319	M	2	315	I	296	I	296	I	3
betaHI	betaI	sol	Gloop			342	316	T	308	T	2	308	T	317	T	T	309	T	309	317	T	309	T	320	T	320	T	2	316	T	297	T	297	T	1
betaHI	betaI	sol				343	317	T	309	T	2	309	T	318	T	T	310	T	310	318	C	310	C	321	C	321	C	2	317	T	298	T	298	T	1
betaHI	betaI	sol				344	318	Q	310	Q	2	310	Q	319	Q	Q	311	Q	311	319	Q	311	Q	322	Q	322	Q	2	318	Q	299	Q	299	Q	1
betaHI	betaI	sol				345	319	C	311	C	2	311	C	320	A	A	312	A	312	320	A	312	A	323	A	323	A	2	319	A	300	A	300	A	2
betaHI	betaI	sol				346	320	R	312	R	2	312	R	321	R	R	313	R	313	321	R	313	R	324	R	324	R	2	320	R	301	R	301	R	2
betaHI	betaI	sol				347	321	S	313	S	2	313	S	322	S	S	314	S	314	322	T	314	T	325	S	325	S	2	321	T	302	T	302	T	2
betaHI	betaI	sol				348	322	S	314	S	2	314	S	323	S	S	315	S	315	323	S	315	S	326	S	326	S	2	322	S	303	S	303	S	2
betaHI	betaI	sol				349	323	Y	315	Y	2	315	Y	324	Y	Y	316	Y	316	324	Y	316	Y	327	Y	327	Y	2	323	Y	304	Y	304	Y	2
betaHI	betaI	sol				350	324	L	316	L	2	316	L	325	L	L	317	L	317	325	T	317	T	328	I	328	I	2	324	L	305	L	305	L	2
betaHI		sol				351	325	A	317	A	2	317	A	326	A	A	318	A	318	326	E	318	E	329	T	329	T	2	325	A	306	A	306	A	2
betaJK		sol				352	326	N	318	N	2	318	N	327	N	S	319	S	319	327	D	319	D	330	S	330	S	2	326	D	307	D	307	D	2
betaJK		sol				353	327	E	319	E	2	319	E	328	E	E	320	E	320	328	E	320	E	331	E	331	E	2	327	E	308	E	308	E	2
betaJK	betaJ	sol				354	328	I	320	I	2	320	I	329	I	I	321	I	321	329	V	321	V	332	I	332	I	2	328	I	309	I	309	I	2
betaJK	betaJ	sol				355	329	L	321	L	2	321	L	330	L	L	322	L	322	330	L	322	L	333	L	333	L	2	329	L	310	L	310	L	2
betaJK	betaJ	sol				356	330	W	322	W	2	322	W	331	W	W	323	W	323	331	W	323	W	334	W	334	W	2	330	W	311	W	311	W	2
betaJK		sol				357	331	G	323	G	2	323	G	332	G	G	324	G	324	332	G	324	G	335	G	335	G	1	331	G	312	G	312	G	2
betaJK	betaK	sol		pad	pad	358	332	H	324	H	2	324	H	333	H	H	325	H	325	333	H	325	H	336	Y	336	Y	1	332	Q	313	Q	313	Q	2
betaJK	betaK	sol	Gbg	Gbg	Gbg	359	333	R	325	R	2	325	R	334	R	R	326	R	326	334	R	326	R	337	R	337	R	3	333	R	314	R	314	R	2
betaJK	betaK	sol		pad	pad	360	334	Y	326	Y	2	326	Y	335	F	F	327	F	327	335	F	327	F	338	F	338	F	3	334	F	315	F	315	F	2
betaJK		sol	Gbg	Gbg	Gbg	361	335	E	327	E	2	327	E	336	E	E	328	E	328	336	F	328	F	339	T	339	T	1	335	V	316	V	316	V	2
betaLM		sol	Gbg	Gbg	Gbg	362	336	P	328	P	1	328	P	337	P	P	329	P	329	337	P	329	P	340	P	340	P	3	336	P	317	P	317	P	2
betaLM		sol		pad	pad	363	337	V	329	V	2	329	V	338	V	V	330	V	330	338	V	330	V	341	V	341	V	3	337	I	318	I	318	I	2
betaLM	betaL	sol	Gbg	Gbg	Gbg	364	338	L	330	L	1	330	L	339	L	L	331	L	331	339	I	331	I	342	L	342	L	1	338	V	319	V	319	V	2
betaLM	betaL	sol	Gbg	pad	pad	365	339	F	331	F	1	331	F	340	F	F	332	F	332	340	S	332	S	343	T	343	T	3	339	A	320	A	320	A	2
betaLM	betaL	sol	Gbg	Gbg	Gbg	366	340	E	332	E	1	332	E	341	E	E	333	E	333	341	L	333	L	344	M	344	L	3	340	E	321	E	321	E	2
betaLM	betaL	sol	Gbg	Gbg	Gbg	367	341	E	333	E	1	333	E	342	E	E	334	E	334	342	E	334	E	345	E	345	E	3	341	E	322	E	322	E	2
betaLM		sol	Gbg	Gbg	Gbg	368	342	K	334	K	1	334	K	343	K	K	335	K	335	343	E	335	E	346	D	346	D	3	342	D	323	D	323	D	2
betaLM		sol		pad	pad	369	343	H	335	H	1	335	H	344	N	N	336	N	336	344	G	336	G	347	G	347	G	3	343	G	324	G	324	G	1
betaLM	betaM	sol		pad	pad	370	344	Y	336	Y	1	336	Y	345	Q	Q	337	Q	337	345	F	337	F	348	F	348	F	3	344	R	325	R	325	R	3
betaLM	betaM	sol	Gbg	Gbg	Gbg	371	345	Y	337	Y	1	337	Y	346	Y	Y	338	Y	338	346	F	338	F	349	Y	349	Y	3	345	Y	326	Y	326	Y	1
betaLM	betaM	sol		pad	pad	372	346	K	338	K	3	338	K	347	K	K	339	K	339	347	K	339	K	350	E	350	E	3	346	S	327	S	327	S	3
betaLM	betaM	sol		pad	pad	373	347	V	339	V	2	339	V	348	I	V	340	V	340	348	V	340	V	351	V	351	V	3	347	V	328	V	328	V	2
betaLM	betaM	sol		pad	pad	374	348	D	340	D	2	340	D	349	D	D	341	D	341	349	D	341	D	352	D	352	D	3	348	D	329	D	329	D	2
betaLM		sol	ATP	ATP2	ATP2	375	349	Y	341	Y	2	341	Y	350	Y	Y	342	Y	342	350	Y	342	Y	353	Y	353	Y	1	349	Y	330	Y	330	Y	3
betaLM		sol		pad	pad	376	350	S	342	S	2	342	S	351	S	S	343	S	343	351	S	343	S	354	N	354	N	3	350	S	331	S	331	S	3
betaLM		sol		pad	pad	377	351	R	343	R	2	343	R	352	H	H	344	H	344	352	Q	344	Q	355	S	355	S	1	351	K	332	K	332	K	1
betaN		sol	ATP	ATP2	ATP2	378	352	F	344	F	1	344	F	353	F	F	345	F	345	353	F	345	F	356	F	356	F	1	352	F	333	F	333	F	2
betaN		sol	ATP	ATP2	ATP2	379	353	H	345	H	1	345	H	354	H	H	346	H	346	354	H	346	H	357	H	357	H	1	353	G	334	G	334	G	2
betaN		sol		pad	pad	380	354	K	346	K	2	346	K	355	K	K	347	K	347	355	A	347	A	358	E	358	E	1	354	N	335	N	335	N	1
betaN	betaN	sol		pad	pad	381	355	T	347	T	2	347	T	356	T	T	348	T	348	356	T	348	T	359	T	359	T	3	355	T	336	T	336	T	1
betaN	betaN	sol		Gbg	Gbg	382	356	Y	348	Y	2	348	Y	357	Y	Y	349	Y	349	357	F	349	F	360	Y	360	Y	3	356	I	337	V	337	I	2
betaN	betaN	sol	Gbg	Gbg	Gbg	383	357	E	349	E	3	349	E	358	E	E	350	E	350	358	E	350	E	361	E	361	E	3	357	K	338	K	338	K	1
betaN		sol	Gbg	Gbg	Gbg	384	358	V	350	V	1	350	V	359	V	V	351	V	351	359	V	351	V	362	T	362	T	3	358	V	339	V	339	V	1
betaN		sol		pad	pad	385	359	P	351	P	3	351	P	360	P	P	352	P	352										359	P	340	P	340	P	3
betaN		sol				386	360	N	352	N	2	352	N	361	S	S	353	S	353	360	P	352	P	363	S	363	S	1
betaN		sol				387	361	T	353	T	2	353	T	362	T	T	354	T	354	361	T	353	T	364	T	364	T	3	360	T	341	T	341	T	1
betaN		sol				388	362	P	354	P	2	354	P	363	P	P	355	P	355	362	P	354	P	365	P	365	P	3	361	P	342	P	342	P	1
betaN		sol				389	363	L	355	L	2	355	L	364	R	R	356	R	356	363	P	355	P	366	S	366	S	3	362	L	343	L	343	L	1
betaN		sol				390	364	C	356	C	1	356	C	365	C	C	357	C	357	364	Y	356	Y	367	L	367	L	3	363	C	344	C	344	C	1
betaN		sol		pad		391	365	S	357	S	3	357	S	366	S	S	358	S	358	365	S	357	S	368	S	368	S	3	364	T	345	T	345	T	3
alphaH	alphaH	sol	Ga	Ga		392	366	A	358	A	1	358	A	367	A	A	359	A	359	366	V	358	V	369	A	369	A	3	365	A	346	A	346	A	2
alphaH	alphaH	sol	Ga	Ga		393	367	R	359	R	1	359	R	368	K	K	360	K	360	367	K	359	K	370	K	370	K	3	366	R	347	R	347	R	2
alphaH	alphaH	sol	Ga	Ga		394	368	D	360	D	3	360	D	369	D	D	361	D	361	368	E	360	E	371	E	371	E	3	367	Q	348	Q	348	Q	3
alphaH	alphaH	sol	Ga	Ga		395	369	L	361	L	3	361	L	370	L	L	362	L	362	369	Q	361	Q	372	L	372	L	3	368	L	349	L	349	L	3
alphaH	alphaH	sol	Ga	Ga		396	370	A	362	A	3	362	A	371	V	V	363	V	363	370	E	362	E	373	A	373	A	3	369	D	350	D	350	D	3
alphaH	alphaH	sol		pad		397	371	E	363	E	3	363	E	372	E	E	364	E	364	371	E	363	E	374	E	374	E	3	370	E	351	E	351	E
alphaH	alphaH	sol		pad		398	372	K	364	K	3	364	K	373	N	N	365	N	365	372	M	364	M	375	L	375	L	3	371	D	352	D	352	D
alphaH	alphaH	sol	Ga	Ga		399	373	K	365	K	3	365	K	374	K	K	366	K	366	373	L	365	L	376	A	376	A	3	372	H	353	R	353	H	3
alphaH	alphaH	sol	Ga	Ga		400	374	Y	366	Y	3	366	Y	375	F	F	367	F	367	374	L	366	L	377	N	377	N	3	373	S	354	S	354	S	3
alphaH	alphaH	sol	Ga	Ga		401	375	I	367	I	3	367	I	376	L	L	368	L	368	375	M	367	M	378	R	378	R	3	374	L	355	L	355	L	3
alphaH	alphaH	sol	Ga	Ga		402	376	L	368	L	3	368	L	377	L	L	369	L	369	376	S	368	S	379	A	379	A	3	375	L	356	L	356	L	3
alphaH	alphaH	sol	Ga	Ga		403	377	S	369	S	3	369	S	378	P	S	370	S	370	377	S	369	S	380	E	380	E	3
Cterm		sol		pad		404	378	N	370	N	3	370	N	379	S	N	371	N	371	378	P	370	P	381	V	381	S	3
Cterm		sol	Ga	Ga		405	379	A	371	A	3	371	A	380	A	S	372	S	372	379	L	371	L	382	P	382	N
Cterm		sol	Ga	Ga		406	380	N	372	N		372	N	381	N	L	373	L	373	380	I	372	I	383	L	383	S
Cterm		sol	Ga	Ga		407	381	S	373	S		373	S	382	S	E	374	E	374	381	A	373	A	384	S	384	L
Cterm		sol		pad		408	382	F	374	F		374	F	383	F	V	375	V	375	382	P	374	P	385	W	385	E
Cterm		sol				409	383	C	375	C		375	C	384	C	L	376	L	376	383	A	375	A	386	S	386	V
Cterm		sol				410	384	Y	376	Y		376	Y	385	Y	F	377	F	377	384	I	376	I	387	V	387	L
Cterm		sol				411	385	E	377	E		377	E	386	E	Q	378	Q	378	385	T	377	T	388	S	388	F		376	E	357	D	357	E	3
Cterm		sol				412	386	N	378	N		378	N	387	N				379	386	N	378	N	389	S	389	Q		377	A	358	A	358	A	3
Cterm		sol				413	387	E	379	E		379	E	388	E				380	387	S	379	S	390	K	390			378	L	359	L	359	L	3
Cterm		sol				414	388	V	380	V		380	V	389	L				381	388	K	380	K	391	L	391			379	T	360	T	360	T	3
Cterm		sol				415	389	A	381	A		381	A	390	A				382	389	E	381	E	392	N	392			380	L	361	L	361	L	3
Cterm		sol				416	390	L	382	L		382	L	391	F				383	390	R	382	R	393	Q	393			381	A	362	A	362	A	3
Cterm		sol				417	391	T	383	T		383	T	392	L				384	391	H	383	H	394	H	394			382	S	363	S	363	S	3
Cterm		sol				418	392	S	384	S		384	S	393	S				385	392	N	384	N	395	A	395			383	A	364	S	364	A	3
Cterm		sol				419	393	K	385	K		385	K	394	R				386	393	S	385	S	396	E	396			384	R	365	R	365	R	3
Cterm		sol				420	394	E	386	E		387	E	395	D				387	394	V	386	V	397	L	397			385	G	366	G	366	G	3
Cterm		sol				421	395	E	387	E		388	E	396	E				388	395	E	387	E	398	E	398			386	P	367	P	367	P	3
Cterm		sol				422	396	E	388	E		389	E	397	E				389	396	C	388	C	399	T	399			387	L	368	L	368	L	3
Cterm		sol				423	397	E	389	E		390	D	398	D				390	397	L	389	L	400	E	400			388	R	369	R	369	R	3
Cterm		sol				424	398	D	390	D		391	S	399	E				391	398	D	390	D	401	E	401			389	K	370	K	370	K	3
Cterm		sol				425	399	S	391	S		392	E	400	A				392	399	G	391	G	402	E	402			390	R	371	R	371	R	3
Cterm		sol				426	400	E	392	E		393	N	401	D				393	400	L	392	L	403	E	403			391	S	372	S	372	S
Cterm		sol				427	401	N	393	N		394	G	402	G				394	401	D	393	D	404	K	404			392	V	373	V	373	V
Cterm		sol				428	402	G	394	G		395	V	403	D				395	402	D	394	D	405	N	405			393	P	374	A	374	P
Cterm		sol				429	403	V	395	V		396	P	404	Q				396	403	I	395	I	406	P	406			394	M	375	V	375	M
Cterm		sol				430	404	P	396	P		397	E	405	D				397	404	S	396	T	407	E	407			395	A	376	A	376	A
Cterm		sol				431	405	E	397	E		398	S	406	G				398	405	T	397	T	408	E	408			396	K	377	K	377	K
Cterm		sol				432	406	S	398	S		399	T	407	R				399	406	K	398	K	409	L	409			397	A	378	A	378	A
Cterm		sol				433	407	T	399	T		400	S	408	S				400	407	L	399	L	410	T	410			398	K			379	K
Cterm		sol				434	408	S	400	S		401	T	409	R				401	408	P	400	P	411	E	411			399	P			380	P
Cterm		sol				435	409	T	401	T		402	D	410	D				402	409	S	401	S	412	R	412			400	K			381	K
Cterm		sol				436	410	D	402	D		403	T	411	G				403	410	K	402	K	413	N	413			401	F			382	F
Cterm		sol				437	411	S	403	S		404	P	412	L				404	411	L	403	L	414	G	414			402	S			383	S
Cterm		sol				438	412	P	404	P		405	P	413	S				405	412	Q	404	Q	415	D	415			403	I			384	I
Cterm		sol				439	413	P	405	P		406	D	414	P				406	413	K	405	K	416	V	416			404	S			385	S
Cterm		sol				440	414	G	406	G		407	I	415	Q				407	414	I	406	I	417	A	417			405	P			386	P
Cterm		sol				441	415	I	407	I		408	D	416	A				408	415	T	407	T	418	N	418			406	D			387	D
Cterm		sol				442	416	D	408	D		409	L	417	R				409	416	G	408	G	419	L	419			407	S			388	S
Cterm		sol				443	417	L	409	L		410	H	418	H				410	417	R	409	R	420	E	420			408	L			389	L
Cterm		sol				444	418	H	410	H		411	N	419	D					418	E	410	E	421	N	421			409	S			390	S
Cterm		sol				445	419	N	411	N		412	Q	420	F					419	D	411	D	422	E	422							391	S
Cterm		sol				446	420	Q	412	Q		413	A	421	D					420	F	412	F	423	S	423							392	N
Cterm		sol				447	421	A	413	A		414	S	422	R					421	P	413	P	424	K	424							393	S
Cterm		sol				448	422	S	414	S		415	V	423	L					422	K	414	K	425	V	425							394	L
Cterm		sol				449	423	V	415	V		416	P	424	Q					423	K	415	K			426							395	E
Cterm		sol				450	424	P	416	P		417	L	425	A					424	L	416	L			427							396	V
Cterm		sol				451	425	L	417	L		418	E	426	G					425	L	417	L			428							397	L
Cterm		sol				452	426	E	418	E		419	P	427	G					426	R	418	R			429							398	F
Cterm		sol				453	427	P	419	P		420	R	428	G					427	M	419	M			430							399	Q
Cterm		sol				454	428	R	420	R		421	P	429	V					428	S	420	S			431							400	G
Cterm		sol				455	429	P	421	P		422	L	430	L					429	S	421	S			432
Cterm		sol				456	430	L	422	L		423	R	431	E					430	T	422	T			433
Cterm		sol				457	431	R	423	R		424	R	432	Q					431	T	423	T			434
						458	432	R	424	R		425	E	433	R					432	S	424	S			435
						459	433	E	425	E		426	S	434	P					433	E	425	E			436
						460	434	S	426	S		427	E	435	Y					434	K	426	K			437
						461	435	E	427	E		428	I	436	R					435	A	427	A			438
						462	436	I	428	I				437	R					436	Y	428	Y			439
						463	437		429					438	E					437	S
						464	438		430					439	S					438	L
						465	439		431					440	E					439	G
						466	440		432					441	I					440	D
						467	441		433											441	L
						468	442		434											442	P
						469														443	M
						470														444	K
						471														445	L
						472														446	Q
						473														447	R
						474														448	I
						475														449	S
						476														450	S
						477														451	V
						478														452	P
						479														453	G
						480														454	N
						481														455	S
						482														456	E
						483														457	E
						484														458	K
						485														459	L
						486														460	V
						487														461	S
						488														462	K
						489														463	T
						490														464	T
						491														465	K
						492														466	M
						493														467	L
						494														468	S
						495														469	D
						496														470	P
						497														471	M
						498														472	S
						499														473	Q
						500														474	S
						501														475	V
						502														476	A
						503														477	D
						504														478	L
						505														479	P
						506														480	P
						507														481	K
						508														482	L
						509														483	Q
						510														484	K
						511														485	M
						512														486	A
						513														487	G
						514														488	G
						515														489	P
						516														490	T
						517														491	R
						518														492	M
						519														493	E
						520														494	G
						521														495	N
						522														496	L
						523														497	P
						524														498	A
						525														499	K
						526														500	L
						527														501	R
						528														502	K
						529														503	M
						530														504	N
						531														505	S
						532														506	D
						533														507	R
						534														508	F
						535														509	T
