# Supplementary material for: Determinants of trafficking, conduction, and disease within a K+ channel revealed through multiparametric deep mutational scanning
Source: eLife journal article supplement (doi:10.7554/elife.76903), 2022-05-31
Supplement: supp [file KCNJ_Clinvar_0325322(edited_annotations).xlsx]

## Sheet: clinvar_KCNJx_0325322
Source1	Gene	Mutation	Condition	Clinical_Significance
Clinvar	KCNJ11	A101D	Transient neonatal diabetes mellitus 3|Hyperinsulinemic hypoglycemia, familial, 2|Permanent neonatal diabetes mellitus	Uncertain significance
Clinvar	KCNJ11	A190T	not provided|Permanent neonatal diabetes mellitus	Conflicting interpretations of pathogenicity
Clinvar	KCNJ2	A115V	Atrial fibrillation, familial, 9|Short QT syndrome 3|Andersen Tawil syndrome	Uncertain significance
Clinvar	KCNJ2	A132T	Andersen Tawil syndrome|Short QT syndrome 3	Uncertain significance
Clinvar	KCNJ5	A139T	Long QT syndrome	Uncertain significance
Clinvar	KCNJ10	A143T	not provided	Uncertain significance
Clinvar	KCNJ13	A158V	not provided	Uncertain significance
Clinvar	KCNJ10	A167V	Pendred syndrome|EAST syndrome|Deafness, autosomal recessive 4, with enlarged vestibular aqueduct|EAST syndrome	Pathogenic
Clinvar	KCNJ11	A172V	not provided	Pathogenic
Clinvar	KCNJ11	A174G	Neonatal insulin-dependent diabetes mellitus	Pathogenic
Clinvar	KCNJ2	A178T	Andersen Tawil syndrome|Short QT syndrome 3	Uncertain significance
Clinvar	KCNJ11	A187V	Transient neonatal diabetes mellitus 3|Hyperinsulinemic hypoglycemia, familial, 2|Permanent neonatal diabetes mellitus	Pathogenic
Clinvar	KCNJ1	A214G	not provided	Uncertain significance
Clinvar	KCNJ1	A214V	Bartter syndrome, type 2, antenatal	Pathogenic
Clinvar	KCNJ1	A198T	Bartter syndrome, type 2, antenatal	Pathogenic
Clinvar	KCNJ18	A200P	Thyrotoxic periodic paralysis, susceptibility to, 1	Pathogenic
Clinvar	KCNJ10	A201T	SeSAME-like syndrome	Pathogenic
Clinvar	KCNJ5	A206T	Hypertrophic cardiomyopathy	Uncertain significance
Clinvar	KCNJ1	A255T	Bartter syndrome, type 2, antenatal	Uncertain significance
Clinvar	KCNJ6	A26S	not provided	Uncertain significance
Clinvar	KCNJ1	A306V	not provided	Uncertain significance
Clinvar	KCNJ11	A376S	Permanent neonatal diabetes mellitus	Uncertain significance
Clinvar	KCNJ11	A28V	Hyperinsulinemic hypoglycemia, familial, 2	Uncertain significance
Clinvar	KCNJ2	A290T	Andersen Tawil syndrome|Short QT syndrome 3	Uncertain significance
Clinvar	KCNJ5	A29D	Long QT syndrome	Uncertain significance
Clinvar	KCNJ2	A371E	Short QT syndrome 3|Andersen Tawil syndrome	Uncertain significance
Clinvar	KCNJ8	A38S	Brugada syndrome	Uncertain significance
Clinvar	KCNJ5	A396T	Long QT syndrome	Uncertain significance
Clinvar	KCNJ10	A45T	EAST syndrome|not provided	Uncertain significance
Clinvar	KCNJ8	A46V	Brugada syndrome	Uncertain significance
Clinvar	KCNJ13	A62S	not provided	Uncertain significance
Clinvar	KCNJ2	A70S	Short QT syndrome 3|Andersen Tawil syndrome|not provided	Uncertain significance
Clinvar	KCNJ2	A70T	not specified	Uncertain significance
Clinvar	KCNJ10	A73T	EAST syndrome	Uncertain significance
Clinvar	KCNJ8	A88G	not provided|Brugada syndrome	Uncertain significance
Clinvar	KCNJ10	A92S	EAST syndrome|not specified	Uncertain significance
Clinvar	KCNJ2	C101F	not provided	Uncertain significance
Clinvar	KCNJ2	C101R	Ventricular tachycardia	Uncertain significance
Clinvar	KCNJ1	C121Y	not provided	Uncertain significance
Clinvar	KCNJ2	C122Y	Cardiovascular phenotype	Uncertain significance
Clinvar	KCNJ10	C140R	EAST syndrome	Pathogenic
Clinvar	KCNJ2	C154F	Congenital long QT syndrome	Uncertain significance
Clinvar	KCNJ13	C234S	not provided	Uncertain significance
Clinvar	KCNJ2	C154Y	Andersen Tawil syndrome|Andersen Tawil syndrome|Short QT syndrome 3	Conflicting interpretations of pathogenicity
Clinvar	KCNJ11	C166F	Permanent neonatal diabetes mellitus|Permanent neonatal diabetes mellitus 2	Pathogenic
Clinvar	KCNJ11	C166W	Diabetes mellitus	Pathogenic
Clinvar	KCNJ11	C166Y	Permanent neonatal diabetes mellitus	Pathogenic
Clinvar	KCNJ8	C176S	not provided	Uncertain significance
Clinvar	KCNJ5	C185F	not provided|Long QT syndrome	Uncertain significance
Clinvar	KCNJ1	C49Y	Intellectual disability|Seizures	Uncertain significance
Clinvar	KCNJ2	C356F	Short QT syndrome 3|Andersen Tawil syndrome	Uncertain significance
Clinvar	KCNJ11	C42R	Permanent neonatal diabetes mellitus|Maturity-onset diabetes of the young, type 13|Transient neonatal diabetes mellitus 3	Pathogenic
Clinvar	KCNJ2	C43Y	Andersen Tawil syndrome|Short QT syndrome 3	Uncertain significance
Clinvar	KCNJ2	C54F	Andersen Tawil syndrome|Familial periodic paralysis	Pathogenic
Clinvar	KCNJ2	C76G	Andersen Tawil syndrome|Short QT syndrome 3|not provided	Conflicting interpretations of pathogenicity
Clinvar	KCNJ10	D100E	not specified|not provided|EAST syndrome	Conflicting interpretations of pathogenicity
Clinvar	KCNJ1	D108H	Bartter syndrome, type 2, antenatal	Pathogenic
Clinvar	KCNJ2	D114G	Short QT syndrome 3|Andersen Tawil syndrome|Atrial fibrillation, familial, 9	Uncertain significance
Clinvar	KCNJ5	D123N	Long QT syndrome	Uncertain significance
Clinvar	KCNJ2	D172N	short QT syndrome|Short QT syndrome 3|Andersen Tawil syndrome|Short QT syndrome 3	Pathogenic
Clinvar	KCNJ2	D17N	Wolff-Parkinson-White pattern	Uncertain significance
Clinvar	KCNJ11	D269N	not specified	Uncertain significance
Clinvar	KCNJ5	D223N	Long QT syndrome	Uncertain significance
Clinvar	KCNJ10	D245E	EAST syndrome|Deafness, autosomal recessive 4, with enlarged vestibular aqueduct|not specified|not provided	Conflicting interpretations of pathogenicity
Clinvar	KCNJ5	D256N	not provided	Uncertain significance
Clinvar	KCNJ11	D274G	not provided	Uncertain significance
Clinvar	KCNJ2	D274V	not provided	Uncertain significance
Clinvar	KCNJ10	D344G	not provided	Uncertain significance
Clinvar	KCNJ1	D364G	not provided	Uncertain significance
Clinvar	KCNJ10	D351E	EAST syndrome	Uncertain significance
Clinvar	KCNJ10	D351N	not provided|Deafness, autosomal recessive 4, with enlarged vestibular aqueduct|Pendred syndrome|EAST syndrome|EAST syndrome|Intellectual disability	Conflicting interpretations of pathogenicity
Clinvar	KCNJ2	D389N	Andersen Tawil syndrome|Short QT syndrome 3	Uncertain significance
Clinvar	KCNJ5	D395A	Long QT syndrome	Uncertain significance
Clinvar	KCNJ5	D404H	Long QT syndrome	Uncertain significance
Clinvar	KCNJ10	D46N	History of neurodevelopmental disorder|not specified|not provided|EAST syndrome|Deafness, autosomal recessive 4, with enlarged vestibular aqueduct|Intellectual disability|Seizures	Conflicting interpretations of pathogenicity
Clinvar	KCNJ6	D47N	not provided	Uncertain significance
Clinvar	KCNJ5	D4N	not provided|Long QT syndrome	Conflicting interpretations of pathogenicity
Clinvar	KCNJ11	D58E	not provided	Uncertain significance
Clinvar	KCNJ2	D71H	Andersen Tawil syndrome|Andersen Tawil syndrome|Short QT syndrome 3	Conflicting interpretations of pathogenicity
Clinvar	KCNJ2	D71N	not provided|Congenital long QT syndrome	Pathogenic
Clinvar	KCNJ2	D71V	Andersen Tawil syndrome|Congenital long QT syndrome	Pathogenic
Clinvar	KCNJ2	D78G	Andersen Tawil syndrome|Congenital long QT syndrome	Pathogenic
Clinvar	KCNJ2	D78H	Short QT syndrome 3|Andersen Tawil syndrome	Uncertain significance
Clinvar	KCNJ2	D78Y	Andersen Tawil syndrome|Short QT syndrome 3|Congenital long QT syndrome	Pathogenic
Clinvar	KCNJ11	E10K	not specified	Benign
Clinvar	KCNJ11	E10Q	not provided	Benign
Clinvar	KCNJ1	E118D	not provided	Uncertain significance
Clinvar	KCNJ2	E125K	Andersen Tawil syndrome|Short QT syndrome 3	Uncertain significance
Clinvar	KCNJ5	E147K	not provided|not specified|Long QT syndrome	Uncertain significance
Clinvar	KCNJ5	E14V	Long QT syndrome	Uncertain significance
Clinvar	KCNJ5	E159G	Familial hyperaldosteronism type 3	Uncertain significance
Clinvar	KCNJ10	E177G	not provided|Deafness, autosomal recessive 4, with enlarged vestibular aqueduct|EAST syndrome|Deafness, autosomal recessive 4, with enlarged vestibular aqueduct|EAST syndrome	Conflicting interpretations of pathogenicity
Clinvar	KCNJ11	E179A	Neonatal insulin-dependent diabetes mellitus	Pathogenic
Clinvar	KCNJ13	E180G	not provided	Uncertain significance
Clinvar	KCNJ13	E260A	not provided	Benign
Clinvar	KCNJ11	E292K	Permanent neonatal diabetes mellitus|not provided	Uncertain significance
Clinvar	KCNJ13	E211G	not provided	Uncertain significance
Clinvar	KCNJ11	E227K	Maturity-onset diabetes of the young, type 13|not provided|Diabetes mellitus|Transient neonatal diabetes mellitus 3	Pathogenic
Clinvar	KCNJ11	E229K	Diabetes mellitus	Pathogenic
Clinvar	KCNJ5	E246K	Familial hyperaldosteronism type 3	Pathogenic
Clinvar	KCNJ10	E261D	EAST syndrome	Uncertain significance
Clinvar	KCNJ11	E282K	Hyperinsulinemic hypoglycemia, familial, 2|Maturity-onset diabetes of the young, type 13|Hyperinsulinemic hypoglycemia, familial, 2|Transient neonatal diabetes mellitus 3|Type 2 diabetes mellitus|Permanent neonatal diabetes mellitus	Pathogenic
Clinvar	KCNJ5	E288D	Hypertrophic cardiomyopathy|Long QT syndrome 13	Conflicting interpretations of pathogenicity
Clinvar	KCNJ2	E299G	Andersen Tawil syndrome|Short QT syndrome 3|Atrial fibrillation, familial, 9	Pathogenic
Clinvar	KCNJ2	E299V	not provided	Pathogenic
Clinvar	KCNJ2	E303K	Congenital long QT syndrome	Uncertain significance
Clinvar	KCNJ11	E322K	Permanent neonatal diabetes mellitus|Diabetes mellitus	Pathogenic
Clinvar	KCNJ1	E52A	not provided	Uncertain significance
Clinvar	KCNJ1	E362A	not provided	Uncertain significance
Clinvar	KCNJ1	E362K	not provided	Uncertain significance
Clinvar	KCNJ2	E349K	not provided|Short QT syndrome 3|Andersen Tawil syndrome	Uncertain significance
Clinvar	KCNJ8	E357G	Brugada syndrome	Uncertain significance
Clinvar	KCNJ10	E368Q	EAST syndrome	Uncertain significance
Clinvar	KCNJ5	E397G	Long QT syndrome|not provided	Uncertain significance
Clinvar	KCNJ10	E42K	not provided	Uncertain significance
Clinvar	KCNJ5	E45K	Long QT syndrome|not provided	Benign
Clinvar	KCNJ5	E45Q	Long QT syndrome	Uncertain significance
Clinvar	KCNJ13	E80K	Leber congenital amaurosis 16|not provided	Conflicting interpretations of pathogenicity
Clinvar	KCNJ10	E98K	EAST syndrome	Uncertain significance
Clinvar	KCNJ5	F106L	Long QT syndrome	Uncertain significance
Clinvar	KCNJ13	F156Y	not provided	Uncertain significance
Clinvar	KCNJ10	F160Y	EAST syndrome	Uncertain significance
Clinvar	KCNJ10	F181L	EAST syndrome	Uncertain significance
Clinvar	KCNJ11	F315L	not provided	Uncertain significance
Clinvar	KCNJ11	F315S	not provided	Pathogenic
Clinvar	KCNJ13	F237L	not provided	Uncertain significance
Clinvar	KCNJ8	F260L	Brugada syndrome	Uncertain significance
Clinvar	KCNJ2	F262V	Short QT syndrome 3|Andersen Tawil syndrome	Uncertain significance
Clinvar	KCNJ11	F333I	Permanent neonatal diabetes mellitus	Pathogenic
Clinvar	KCNJ1	F378L	not provided	Uncertain significance
Clinvar	KCNJ11	F35L	Permanent neonatal diabetes mellitus	Pathogenic
Clinvar	KCNJ11	F35V	Permanent neonatal diabetes mellitus	Pathogenic
Clinvar	KCNJ11	F60S	not specified	Uncertain significance
Clinvar	KCNJ11	F60Y	Permanent neonatal diabetes mellitus 2	Pathogenic
Clinvar	KCNJ10	F75L	EAST syndrome	Pathogenic
Clinvar	KCNJ2	G100V	Andersen Tawil syndrome|Short QT syndrome 3	Uncertain significance
Clinvar	KCNJ5	G105A	Long QT syndrome|not provided	Uncertain significance
Clinvar	KCNJ10	G132S	not provided	Uncertain significance
Clinvar	KCNJ2	G144A	Andersen Tawil syndrome|Short QT syndrome 3|Congenital long QT syndrome	Pathogenic
Clinvar	KCNJ2	G144D	not provided|Andersen Tawil syndrome|Short QT syndrome 3|Atrial fibrillation, familial, 9|Andersen Tawil syndrome|Short QT syndrome 3|Congenital long QT syndrome|Atrial fibrillation, familial, 1|Andersen Tawil syndrome|Short QT syndrome 1	Pathogenic
Clinvar	KCNJ2	G144S	Andersen Tawil syndrome|Short QT syndrome 3|Congenital long QT syndrome	Pathogenic
Clinvar	KCNJ2	G146A	Congenital long QT syndrome	Uncertain significance
Clinvar	KCNJ2	G146D	Andersen Tawil syndrome|Short QT syndrome 3|Congenital long QT syndrome	Uncertain significance
Clinvar	KCNJ2	G146R	not provided	Uncertain significance
Clinvar	KCNJ2	G146S	Congenital long QT syndrome	Uncertain significance
Clinvar	KCNJ5	G151E	Long QT syndrome|Familial hyperaldosteronism type 3	Pathogenic
Clinvar	KCNJ5	G151R	not provided	Pathogenic
Clinvar	KCNJ5	G151R	Familial hyperaldosteronism type 3|Aldosterone-producing adrenal adenoma, somatic|not provided	Pathogenic
Clinvar	KCNJ6	G154S	Keppen-Lubinsky syndrome	Pathogenic
Clinvar	KCNJ11	G156R	Hyperinsulinemic hypoglycemia, familial, 2	Pathogenic
Clinvar	KCNJ1	G167E	Bartter syndrome, type 2, antenatal	Pathogenic
Clinvar	KCNJ2	G177S	not provided	Uncertain significance
Clinvar	KCNJ13	G183D	Leber congenital amaurosis 16	Uncertain significance
Clinvar	KCNJ2	G18S	Andersen Tawil syndrome|Short QT syndrome 3	Uncertain significance
Clinvar	KCNJ2	G206S	Short QT syndrome 3|Andersen Tawil syndrome|not specified|not provided	Uncertain significance
Clinvar	KCNJ1	G228E	Bartter syndrome, type 2, antenatal	Uncertain significance
Clinvar	KCNJ2	G215D	Andersen Tawil syndrome|Short QT syndrome 3|Andersen Tawil syndrome|Congenital long QT syndrome	Pathogenic
Clinvar	KCNJ5	G222D	not provided|Long QT syndrome	Uncertain significance
Clinvar	KCNJ5	G247R	not provided|Long QT syndrome	Conflicting interpretations of pathogenicity
Clinvar	KCNJ10	G273C	EAST syndrome	Uncertain significance
Clinvar	KCNJ11	G289A	Hyperinsulinemic hypoglycemia, familial, 2	Pathogenic
Clinvar	KCNJ11	G289V	Hyperinsulinemic hypoglycemia, familial, 2	Pathogenic
Clinvar	KCNJ2	G300A	Congenital long QT syndrome	Uncertain significance
Clinvar	KCNJ2	G300D	Andersen Tawil syndrome|not provided|Congenital long QT syndrome	Pathogenic
Clinvar	KCNJ10	G308R	not specified	Uncertain significance
Clinvar	KCNJ11	G312S	not specified	Uncertain significance
Clinvar	KCNJ11	G324R	Transient neonatal diabetes mellitus 3|Hyperinsulinemic hypoglycemia, familial, 2|Permanent neonatal diabetes mellitus	Uncertain significance
Clinvar	KCNJ1	G335R	Bartter syndrome, type 2, antenatal	Uncertain significance
Clinvar	KCNJ11	G334D	Permanent neonatal diabetes mellitus	Pathogenic
Clinvar	KCNJ2	G300V	not provided|Andersen Tawil syndrome|Congenital long QT syndrome	Pathogenic
Clinvar	KCNJ10	G341R	not provided	Uncertain significance
Clinvar	KCNJ10	G350A	EAST syndrome	Uncertain significance
Clinvar	KCNJ10	G350R	EAST syndrome	Uncertain significance
Clinvar	KCNJ10	G369D	EAST syndrome	Uncertain significance
Clinvar	KCNJ5	G374V	not provided	Uncertain significance
Clinvar	KCNJ5	G387R	Long QT syndrome|Familial hyperaldosteronism type 3|Andersen Tawil syndrome|Long QT syndrome 13	Conflicting interpretations of pathogenicity
Clinvar	KCNJ11	G40D	Transient neonatal diabetes mellitus 3|Hyperinsulinemic hypoglycemia, familial, 2|Permanent neonatal diabetes mellitus	Uncertain significance
Clinvar	KCNJ2	G33R	not provided	Uncertain significance
Clinvar	KCNJ11	G53D	Permanent neonatal diabetes mellitus|Permanent neonatal diabetes mellitus 2	Pathogenic
Clinvar	KCNJ11	G53R	Transient neonatal diabetes mellitus 3	Pathogenic
Clinvar	KCNJ11	G53S	Transient neonatal diabetes mellitus 3	Pathogenic
Clinvar	KCNJ10	G77R	EAST syndrome	Pathogenic
Clinvar	KCNJ11	G98S	Transient neonatal diabetes mellitus 3|Hyperinsulinemic hypoglycemia, familial, 2|Permanent neonatal diabetes mellitus	Uncertain significance
Clinvar	KCNJ2	G52V	not specified	Uncertain significance
Clinvar	KCNJ11	H175Q	Maturity-onset diabetes of the young, type 13|Transient neonatal diabetes mellitus 3|Hyperinsulinemic hypoglycemia, familial, 2	Uncertain significance
Clinvar	KCNJ11	H186D	not provided	Pathogenic
Clinvar	KCNJ10	H257D	EAST syndrome	Uncertain significance
Clinvar	KCNJ11	H259R	Hyperinsulinemic hypoglycemia, familial, 2|not provided	Pathogenic
Clinvar	KCNJ2	H110Y	not provided	Uncertain significance
Clinvar	KCNJ10	H93L	EAST syndrome	Uncertain significance
Clinvar	KCNJ10	H93R	EAST syndrome	Uncertain significance
Clinvar	KCNJ16	I11V	not provided	Benign
Clinvar	KCNJ13	I120T	Leber congenital amaurosis 16|not provided	Pathogenic
Clinvar	KCNJ11	I210T	not specified	Uncertain significance
Clinvar	KCNJ10	I129V	EAST syndrome	Uncertain significance
Clinvar	KCNJ2	H53R	Short QT syndrome 3|Andersen Tawil syndrome	Uncertain significance
Clinvar	KCNJ10	I144V	EAST syndrome	Uncertain significance
Clinvar	KCNJ5	I144V	Congenital long QT syndrome|Long QT syndrome|Familial hyperaldosteronism type 3	Conflicting interpretations of pathogenicity
Clinvar	KCNJ5	I150T	Long QT syndrome	Uncertain significance
Clinvar	KCNJ5	I157S	Familial hyperaldosteronism type 3	Pathogenic
Clinvar	KCNJ13	I160T	not provided	Uncertain significance
Clinvar	KCNJ11	I167L	Permanent neonatal diabetes mellitus|Permanent neonatal diabetes mellitus 2	Pathogenic
Clinvar	KCNJ10	I169T	EAST syndrome	Uncertain significance
Clinvar	KCNJ2	I137N	Short QT syndrome 3|Andersen Tawil syndrome	Uncertain significance
Clinvar	KCNJ2	I170M	Cardiovascular phenotype	Uncertain significance
Clinvar	KCNJ5	I173S	not provided	Uncertain significance
Clinvar	KCNJ2	I171V	Andersen Tawil syndrome|Short QT syndrome 3	Uncertain significance
Clinvar	KCNJ10	I179N	EAST syndrome	Uncertain significance
Clinvar	KCNJ11	I182V	Permanent neonatal diabetes mellitus	Pathogenic
Clinvar	KCNJ5	I208V	Long QT syndrome	Uncertain significance
Clinvar	KCNJ10	I209T	SeSAME-like syndrome	Pathogenic
Clinvar	KCNJ10	I229F	not provided	Uncertain significance
Clinvar	KCNJ5	I229M	Long QT syndrome	Uncertain significance
Clinvar	KCNJ10	I229V	not provided|EAST syndrome	Uncertain significance
Clinvar	KCNJ5	I250F	Long QT syndrome|not provided	Uncertain significance
Clinvar	KCNJ2	I175L	Andersen Tawil syndrome|Short QT syndrome 3	Uncertain significance
Clinvar	KCNJ2	I258T	not specified	Benign
Clinvar	KCNJ2	I261V	Hypertrophic cardiomyopathy|Andersen Tawil syndrome|Short QT syndrome 3|not provided	Uncertain significance
Clinvar	KCNJ2	I267V	not provided	Uncertain significance
Clinvar	KCNJ10	I282N	EAST syndrome	Uncertain significance
Clinvar	KCNJ2	I269K	not provided	Uncertain significance
Clinvar	KCNJ11	I296L	Permanent neonatal diabetes mellitus	Pathogenic
Clinvar	KCNJ11	I296V	Permanent neonatal diabetes mellitus	Pathogenic
Clinvar	KCNJ13	I348T	not provided	Uncertain significance
Clinvar	KCNJ8	I398M	Hypertrophic cardiomyopathy	Benign
Clinvar	KCNJ2	I287L	Andersen Tawil syndrome|Short QT syndrome 3	Uncertain significance
Clinvar	KCNJ6	I53V	not provided	Benign
Clinvar	KCNJ10	I60T	not provided|EAST syndrome|History of neurodevelopmental disorder	Uncertain significance
Clinvar	KCNJ15	I6V	not provided	Benign
Clinvar	KCNJ2	I406T	not provided	Uncertain significance
Clinvar	KCNJ2	I79T	not provided	Conflicting interpretations of pathogenicity
Clinvar	KCNJ13	I9M	Retinal dystrophy	Uncertain significance
Clinvar	KCNJ2	I87V	Andersen Tawil syndrome|Short QT syndrome 3	Uncertain significance
Clinvar	KCNJ11	K170N	Permanent neonatal diabetes mellitus|Permanent neonatal diabetes mellitus 2	Pathogenic
Clinvar	KCNJ11	K170R	Permanent neonatal diabetes mellitus|Permanent neonatal diabetes mellitus 2	Pathogenic
Clinvar	KCNJ13	K23N	not provided	Uncertain significance
Clinvar	KCNJ2	K120T	not provided|Andersen Tawil syndrome|Short QT syndrome 3	Uncertain significance
Clinvar	KCNJ2	K34N	Andersen Tawil syndrome	Uncertain significance
Clinvar	KCNJ10	K354R	not provided|EAST syndrome|Deafness, autosomal recessive 4, with enlarged vestibular aqueduct|Nonsyndromic Hearing Loss, Recessive	Uncertain significance
Clinvar	KCNJ2	K34R	Andersen Tawil syndrome|Short QT syndrome 3	Uncertain significance
Clinvar	KCNJ18	K366R	Thyrotoxic periodic paralysis, susceptibility to, 1|Thyrotoxic periodic paralysis 2	Pathogenic
Clinvar	KCNJ8	K382R	Brugada syndrome	Uncertain significance
Clinvar	KCNJ6	K3M	Keppen-Lubinsky syndrome	Uncertain significance
Clinvar	KCNJ5	K407R	Long QT syndrome	Uncertain significance
Clinvar	KCNJ1	K107E	not provided|Bartter syndrome, type 2, antenatal	Uncertain significance
Clinvar	KCNJ2	K364R	not provided|Short QT syndrome 3|Andersen Tawil syndrome	Uncertain significance
Clinvar	KCNJ13	L114P	Retinal dystrophy|not provided	Uncertain significance
Clinvar	KCNJ11	L122P	Hyperinsulinemic hypoglycemia, familial, 2	Pathogenic
Clinvar	KCNJ5	L133F	Long QT syndrome	Uncertain significance
Clinvar	KCNJ10	L142V	EAST syndrome	Uncertain significance
Clinvar	KCNJ13	L144P	Leber congenital amaurosis 16	Uncertain significance
Clinvar	KCNJ10	L146F	EAST syndrome	Uncertain significance
Clinvar	KCNJ11	L147P	Hyperinsulinemic hypoglycemia, familial, 2	Pathogenic
Clinvar	KCNJ10	L151M	EAST syndrome	Uncertain significance
Clinvar	KCNJ13	L241Q	not provided	Uncertain significance
Clinvar	KCNJ11	L164F	not specified	Uncertain significance
Clinvar	KCNJ5	L168R	not provided	Pathogenic
Clinvar	KCNJ5	L169S	not provided	Uncertain significance
Clinvar	KCNJ6	L171R	Keppen-Lubinsky syndrome	Pathogenic
Clinvar	KCNJ5	L174M	Long QT syndrome	Uncertain significance
Clinvar	KCNJ11	L181F	not provided	Uncertain significance
Clinvar	KCNJ1	L207F	not provided|Bartter syndrome, type 2, antenatal	Benign
Clinvar	KCNJ2	L109P	Short QT syndrome 3|Andersen Tawil syndrome	Uncertain significance
Clinvar	KCNJ2	L193H	Short QT syndrome 3|Andersen Tawil syndrome|not specified	Uncertain significance
Clinvar	KCNJ10	L208F	EAST syndrome	Uncertain significance
Clinvar	KCNJ13	L208V	not provided	Uncertain significance
Clinvar	KCNJ13	L289P	not provided	Uncertain significance
Clinvar	KCNJ2	L193P	Andersen Tawil syndrome|not provided	Conflicting interpretations of pathogenicity
Clinvar	KCNJ10	L218F	Deafness, autosomal recessive 4, with enlarged vestibular aqueduct|EAST syndrome|Pendred syndrome|EAST syndrome|Deafness, autosomal recessive 4, with enlarged vestibular aqueduct|not specified	Uncertain significance
Clinvar	KCNJ1	L220F	Bartter syndrome, type 2, antenatal|not provided	Pathogenic
Clinvar	KCNJ1	L220R	Bartter syndrome, type 2, antenatal	Pathogenic
Clinvar	KCNJ13	L302P	not provided	Uncertain significance
Clinvar	KCNJ2	L217P	Congenital long QT syndrome	Uncertain significance
Clinvar	KCNJ11	L233F	Maturity-onset diabetes of the young, type 13	Pathogenic
Clinvar	KCNJ13	L241P	Leber congenital amaurosis 16	Pathogenic
Clinvar	KCNJ11	L270V	Permanent neonatal diabetes mellitus|Monogenic diabetes|not specified|Hyperinsulinemic hypoglycemia, familial, 2|Permanent neonatal diabetes mellitus 2|Maturity-onset diabetes of the young, type 13|not provided|Transient neonatal diabetes mellitus 3	Benign
Clinvar	KCNJ2	L222S	not provided	Pathogenic
Clinvar	KCNJ8	L2F	Cardiovascular phenotype	Uncertain significance
Clinvar	KCNJ11	L2P	Neonatal diabetes mellitus	Pathogenic
Clinvar	KCNJ1	L320P	not provided	Uncertain significance
Clinvar	KCNJ11	L355P	Transient neonatal diabetes mellitus 3|Maturity-onset diabetes of the young, type 13|Hyperinsulinemic hypoglycemia, familial, 2|not specified	Uncertain significance
Clinvar	KCNJ2	L282W	Short QT syndrome 3|Andersen Tawil syndrome|Atrial fibrillation, familial, 9|Andersen Tawil syndrome|Short QT syndrome 3	Uncertain significance
Clinvar	KCNJ10	L50F	EAST syndrome|not provided|Deafness, autosomal recessive 4, with enlarged vestibular aqueduct	Uncertain significance
Clinvar	KCNJ10	L70F	EAST syndrome	Uncertain significance
Clinvar	KCNJ10	L81F	EAST syndrome	Uncertain significance
Clinvar	KCNJ10	L97Q	EAST syndrome	Uncertain significance
Clinvar	KCNJ10	L99P	not provided|Deafness, autosomal recessive 4, with enlarged vestibular aqueduct|EAST syndrome	Uncertain significance
Clinvar	KCNJ11	M158L	Transient neonatal diabetes mellitus 3	Uncertain significance
Clinvar	KCNJ2	L408V	not provided	Benign
Clinvar	KCNJ13	M1T	Leber congenital amaurosis 16	Uncertain significance
Clinvar	KCNJ10	M1V	EAST syndrome	Uncertain significance
Clinvar	KCNJ5	M210I	not provided|Long QT syndrome	Benign
Clinvar	KCNJ10	M21T	EAST syndrome	Uncertain significance
Clinvar	KCNJ11	M240R	not provided	Uncertain significance
Clinvar	KCNJ5	M289T	Long QT syndrome	Uncertain significance
Clinvar	KCNJ2	M1T	not provided	Uncertain significance
Clinvar	KCNJ2	M301L	not provided|Short QT syndrome 3|Andersen Tawil syndrome	Conflicting interpretations of pathogenicity
Clinvar	KCNJ2	M301R	not provided	Pathogenic
Clinvar	KCNJ2	M301V	not provided|Andersen Tawil syndrome|Short QT syndrome 3	Conflicting interpretations of pathogenicity
Clinvar	KCNJ2	M307I	Congenital long QT syndrome	Uncertain significance
Clinvar	KCNJ5	M323T	Congenital long QT syndrome|Familial hyperaldosteronism type 3	Uncertain significance
Clinvar	KCNJ1	M357T	Bartter syndrome, type 2, antenatal|not specified|not provided	Benign
Clinvar	KCNJ11	M375V	not provided	Uncertain significance
Clinvar	KCNJ1	M391I	not provided	Uncertain significance
Clinvar	KCNJ8	M392I	Brugada syndrome	Uncertain significance
Clinvar	KCNJ8	M406I	Brugada syndrome	Uncertain significance
Clinvar	KCNJ5	M54L	not provided	Uncertain significance
Clinvar	KCNJ11	M88I	Hyperinsulinemic hypoglycemia, familial, 2|Permanent neonatal diabetes mellitus|Transient neonatal diabetes mellitus 3	Uncertain significance
Clinvar	KCNJ1	N124K	Bartter syndrome, type 2, antenatal	Pathogenic
Clinvar	KCNJ13	N186K	not provided	Uncertain significance
Clinvar	KCNJ5	N179S	Long QT syndrome	Uncertain significance
Clinvar	KCNJ2	M307V	Cardiovascular phenotype|Short QT syndrome 3|Andersen Tawil syndrome	Conflicting interpretations of pathogenicity
Clinvar	KCNJ2	N190I	Andersen Tawil syndrome|Short QT syndrome 3	Uncertain significance
Clinvar	KCNJ2	N216H	Andersen Tawil syndrome|Congenital long QT syndrome	Pathogenic
Clinvar	KCNJ10	N232D	EAST syndrome	Uncertain significance
Clinvar	KCNJ1	N259T	not provided	Uncertain significance
Clinvar	KCNJ11	N335K	Permanent neonatal diabetes mellitus	Uncertain significance
Clinvar	KCNJ2	N216I	Short QT syndrome 3|Andersen Tawil syndrome	Uncertain significance
Clinvar	KCNJ13	N261H	not provided	Uncertain significance
Clinvar	KCNJ2	N251S	not provided	Uncertain significance
Clinvar	KCNJ1	N384I	Malignant tumor of prostate	Uncertain significance
Clinvar	KCNJ8	N389S	Brugada syndrome	Uncertain significance
Clinvar	KCNJ10	N38D	not provided	Uncertain significance
Clinvar	KCNJ2	N28S	Brugada syndrome	Uncertain significance
Clinvar	KCNJ6	N64S	Keppen-Lubinsky syndrome	Uncertain significance
Clinvar	KCNJ10	P101L	EAST syndrome	Uncertain significance
Clinvar	KCNJ10	P101S	EAST syndrome	Uncertain significance
Clinvar	KCNJ10	P101T	Deafness, autosomal recessive 4, with enlarged vestibular aqueduct|EAST syndrome|EAST syndrome|Deafness, autosomal recessive 4, with enlarged vestibular aqueduct|not specified	Uncertain significance
Clinvar	KCNJ10	P102L	not provided|EAST syndrome	Conflicting interpretations of pathogenicity
Clinvar	KCNJ10	P102T	EAST syndrome	Uncertain significance
Clinvar	KCNJ1	P110L	Bartter syndrome, type 2, antenatal	Pathogenic
Clinvar	KCNJ12	P122S	not provided	Uncertain significance
Clinvar	KCNJ13	P127S	not provided	Uncertain significance
Clinvar	KCNJ2	N318S	Andersen Tawil syndrome|Short QT syndrome 3|Andersen Tawil syndrome	Uncertain significance
Clinvar	KCNJ2	N410S	Cardiovascular phenotype|not specified|not provided|Andersen Tawil syndrome|Short QT syndrome 3|Atrial fibrillation, familial, 9|Andersen Tawil syndrome|Short QT syndrome 3	Conflicting interpretations of pathogenicity
Clinvar	KCNJ10	P194H	Deafness, autosomal recessive 4, with enlarged vestibular aqueduct	Pathogenic
Clinvar	KCNJ10	P252R	Abnormality of the nervous system	Pathogenic
Clinvar	KCNJ11	P254L	Hyperinsulinemic hypoglycemia, familial, 2	Pathogenic
Clinvar	KCNJ11	P266L	Permanent neonatal diabetes mellitus|Transient neonatal diabetes mellitus 3|Hyperinsulinemic hypoglycemia, familial, 2	Uncertain significance
Clinvar	KCNJ5	P285R	not provided	Uncertain significance
Clinvar	KCNJ1	P327L	Bartter syndrome, type 2, antenatal	Uncertain significance
Clinvar	KCNJ10	P313S	not provided	Uncertain significance
Clinvar	KCNJ1	P353S	not provided	Uncertain significance
Clinvar	KCNJ10	P339S	EAST syndrome	Uncertain significance
Clinvar	KCNJ10	P339T	EAST syndrome	Uncertain significance
Clinvar	KCNJ2	P186L	Andersen Tawil syndrome|Congenital long QT syndrome	Pathogenic
Clinvar	KCNJ10	P352T	EAST syndrome	Uncertain significance
Clinvar	KCNJ5	P384L	not provided	Uncertain significance
Clinvar	KCNJ5	P384Q	Long QT syndrome	Uncertain significance
Clinvar	KCNJ5	P384R	Long QT syndrome|Long QT syndrome 13	Uncertain significance
Clinvar	KCNJ2	P186Q	Short QT syndrome 3|Andersen Tawil syndrome	Pathogenic
Clinvar	KCNJ2	P351S	Congenital long QT syndrome	Uncertain significance
Clinvar	KCNJ2	P404R	Short QT syndrome 3|Atrial fibrillation, familial, 9|Andersen Tawil syndrome	Uncertain significance
Clinvar	KCNJ10	Q111E	not provided	Uncertain significance
Clinvar	KCNJ11	Q348H	Monogenic diabetes	Uncertain significance
Clinvar	KCNJ5	Q282E	Familial hyperaldosteronism type 3|not specified|Cardiovascular phenotype|Long QT syndrome 13|Long QT syndrome|Congenital long QT syndrome	Benign
Clinvar	KCNJ2	P415L	not provided|Short QT syndrome 3|Andersen Tawil syndrome	Uncertain significance
Clinvar	KCNJ10	Q332E	not provided	Uncertain significance
Clinvar	KCNJ5	Q378P	not provided	Benign
Clinvar	KCNJ8	Q411P	Brugada syndrome	Uncertain significance
Clinvar	KCNJ11	Q52R	Permanent neonatal diabetes mellitus	Pathogenic
Clinvar	KCNJ5	R115Q	not provided	Uncertain significance
Clinvar	KCNJ13	R195Q	not provided|Snowflake vitreoretinal degeneration	Uncertain significance
Clinvar	KCNJ11	R206C	not provided	Pathogenic
Clinvar	KCNJ11	R206H	Hyperinsulinemic hypoglycemia, familial, 2	Pathogenic
Clinvar	KCNJ1	R31H	not provided|Bartter syndrome, type 2, antenatal	Conflicting interpretations of pathogenicity
Clinvar	KCNJ10	R134H	not provided|EAST syndrome	Uncertain significance
Clinvar	KCNJ10	R134S	EAST syndrome	Pathogenic
Clinvar	KCNJ11	R136C	Hyperinsulinemic hypoglycemia, familial, 2	Pathogenic
Clinvar	KCNJ11	R136H	Permanent neonatal diabetes mellitus|Transient neonatal diabetes mellitus 3|Hyperinsulinemic hypoglycemia, familial, 2	Uncertain significance
Clinvar	KCNJ13	R162Q	not provided|Leber congenital amaurosis 16	Uncertain significance
Clinvar	KCNJ13	R162W	not provided|Snowflake vitreoretinal degeneration	Pathogenic
Clinvar	KCNJ1	R188C	not specified|Bartter syndrome, type 2, antenatal	Conflicting interpretations of pathogenicity
Clinvar	KCNJ1	R188S	not provided	Uncertain significance
Clinvar	KCNJ11	R16H	Type 2 diabetes mellitus	Uncertain significance
Clinvar	KCNJ10	R171Q	EAST syndrome	Pathogenic
Clinvar	KCNJ10	R171W	Pendred syndrome|Deafness, autosomal recessive 4, with enlarged vestibular aqueduct|EAST syndrome|EAST syndrome	Uncertain significance
Clinvar	KCNJ10	R175Q	not provided|EAST syndrome	Conflicting interpretations of pathogenicity
Clinvar	KCNJ11	R176C	not specified	Uncertain significance
Clinvar	KCNJ11	R176H	Hyperinsulinemic hypoglycemia, familial, 2|Transient neonatal diabetes mellitus 3|Permanent neonatal diabetes mellitus	Uncertain significance
Clinvar	KCNJ10	R180H	not provided	Uncertain significance
Clinvar	KCNJ1	R184W	Bartter syndrome, type 2, antenatal	Pathogenic
Clinvar	KCNJ2	P420L	Cardiovascular phenotype|short QT syndrome|Familial atrial fibrillation|Short QT syndrome 3|Andersen Tawil syndrome|Andersen Tawil syndrome	Conflicting interpretations of pathogenicity
Clinvar	KCNJ2	Q310R	Andersen Tawil syndrome|Short QT syndrome 3	Uncertain significance
Clinvar	KCNJ2	R189G	not provided	Pathogenic
Clinvar	KCNJ2	R189I	not provided|Congenital long QT syndrome	Pathogenic
Clinvar	KCNJ10	R18Q	History of neurodevelopmental disorder|not specified|not provided|EAST syndrome|Seizures|Autistic disorder|Intellectual disability	Conflicting interpretations of pathogenicity
Clinvar	KCNJ13	R18Q	not provided	Uncertain significance
Clinvar	KCNJ10	R18W	EAST syndrome|not provided|Deafness, autosomal recessive 4, with enlarged vestibular aqueduct|History of neurodevelopmental disorder	Uncertain significance
Clinvar	KCNJ11	R192H	Transient neonatal diabetes mellitus 3|Hyperinsulinemic hypoglycemia, familial, 2|Permanent neonatal diabetes mellitus	Uncertain significance
Clinvar	KCNJ1	R212P	not provided	Uncertain significance
Clinvar	KCNJ11	R195H	not specified|Permanent neonatal diabetes mellitus|Transient neonatal diabetes mellitus 3|Hyperinsulinemic hypoglycemia, familial, 2|not provided|Permanent neonatal diabetes mellitus	Conflicting interpretations of pathogenicity
Clinvar	KCNJ4	R196C	Malignant tumor of prostate	Uncertain significance
Clinvar	KCNJ11	R201C	Diabetes mellitus|Permanent neonatal diabetes mellitus|Permanent neonatal diabetes mellitus 2|Transient neonatal diabetes mellitus 3	Pathogenic
Clinvar	KCNJ11	R201H	Permanent neonatal diabetes mellitus|Permanent neonatal diabetes mellitus 2|not provided|Neonatal insulin-dependent diabetes mellitus|Transient neonatal diabetes mellitus 3	Pathogenic
Clinvar	KCNJ11	R201L	Permanent neonatal diabetes mellitus	Pathogenic
Clinvar	KCNJ1	R184Q	Bartter syndrome, type 2, antenatal	Pathogenic
Clinvar	KCNJ13	R203Q	not provided	Uncertain significance
Clinvar	KCNJ18	R205H	Thyrotoxic periodic paralysis 2	Pathogenic
Clinvar	KCNJ11	R206L	Hyperinsulinemic hypoglycemia, familial, 2|Transient neonatal diabetes mellitus 3|Permanent neonatal diabetes mellitus	Uncertain significance
Clinvar	KCNJ5	R211W	Long QT syndrome	Uncertain significance
Clinvar	KCNJ2	R189K	not provided	Pathogenic
Clinvar	KCNJ11	R301C	not provided	Pathogenic
Clinvar	KCNJ2	R189T	Andersen Tawil syndrome|Short QT syndrome 3	Uncertain significance
Clinvar	KCNJ2	R213G	not provided	Pathogenic
Clinvar	KCNJ2	R218L	not provided|Andersen Tawil syndrome|Short QT syndrome 3	Conflicting interpretations of pathogenicity
Clinvar	KCNJ18	R219C	Thyrotoxic periodic paralysis 2	Uncertain significance
Clinvar	KCNJ5	R220L	Cardiovascular phenotype	Uncertain significance
Clinvar	KCNJ5	R220W	Long QT syndrome	Uncertain significance
Clinvar	KCNJ11	R221G	not provided	Uncertain significance
Clinvar	KCNJ11	R221H	Permanent neonatal diabetes mellitus|Transient neonatal diabetes mellitus 3|Hyperinsulinemic hypoglycemia, familial, 2	Uncertain significance
Clinvar	KCNJ5	R225H	Long QT syndrome	Uncertain significance
Clinvar	KCNJ11	R314H	Permanent neonatal diabetes mellitus 1	Uncertain significance
Clinvar	KCNJ10	R230Q	EAST syndrome	Uncertain significance
Clinvar	KCNJ10	R230W	EAST syndrome|not provided	Conflicting interpretations of pathogenicity
Clinvar	KCNJ5	R235Q	not provided	Uncertain significance
Clinvar	KCNJ5	R235W	not provided|Long QT syndrome	Uncertain significance
Clinvar	KCNJ5	R242Q	Long QT syndrome	Uncertain significance
Clinvar	KCNJ5	R242W	Long QT syndrome	Uncertain significance
Clinvar	KCNJ1	R25Q	not provided|Bartter syndrome, type 2, antenatal	Conflicting interpretations of pathogenicity
Clinvar	KCNJ2	R218P	not provided	Pathogenic
Clinvar	KCNJ2	R218Q	not provided|Andersen Tawil syndrome|Andersen Tawil syndrome|Short QT syndrome 3|Congenital long QT syndrome	Pathogenic
Clinvar	KCNJ5	R267H	Congenital long QT syndrome|Familial hyperaldosteronism type 3	Uncertain significance
Clinvar	KCNJ10	R271C	not specified|EAST syndrome|Deafness, autosomal recessive 4, with enlarged vestibular aqueduct|History of neurodevelopmental disorder	Benign
Clinvar	KCNJ10	R271H	History of neurodevelopmental disorder|not specified|not provided|EAST syndrome|Deafness, autosomal recessive 4, with enlarged vestibular aqueduct	Conflicting interpretations of pathogenicity
Clinvar	KCNJ8	R274C	Brugada syndrome|Sudden unexplained death	Uncertain significance
Clinvar	KCNJ8	R274H	Brugada syndrome	Uncertain significance
Clinvar	KCNJ11	R27C	not provided|Hyperinsulinemic hypoglycemia, familial, 2|Permanent neonatal diabetes mellitus|Transient neonatal diabetes mellitus 3|Permanent neonatal diabetes mellitus|Hyperinsulinemic hypoglycemia, familial, 2	Conflicting interpretations of pathogenicity
Clinvar	KCNJ11	R27H	not provided|Hyperinsulinemic hypoglycemia, familial, 2|Permanent neonatal diabetes mellitus|Transient neonatal diabetes mellitus 3|Permanent neonatal diabetes mellitus	Uncertain significance
Clinvar	KCNJ10	R27Q	EAST syndrome	Uncertain significance
Clinvar	KCNJ10	R27W	EAST syndrome	Uncertain significance
Clinvar	KCNJ11	R369C	Permanent neonatal diabetes mellitus	Uncertain significance
Clinvar	KCNJ11	R369L	not specified	Uncertain significance
Clinvar	KCNJ8	R28P	Cardiac arrest	Uncertain significance
Clinvar	KCNJ10	R28Q	EAST syndrome	Uncertain significance
Clinvar	KCNJ10	R297C	EAST syndrome|not provided	Pathogenic
Clinvar	KCNJ11	R29H	not provided	Uncertain significance
Clinvar	KCNJ11	R301H	Maturity-onset diabetes of the young, type 13|Hyperinsulinemic hypoglycemia, familial, 2|Transient neonatal diabetes mellitus 3|Permanent neonatal diabetes mellitus|not provided|Transient neonatal diabetes mellitus 3|Hyperinsulinemic hypoglycemia, familial, 2	Conflicting interpretations of pathogenicity
Clinvar	KCNJ11	R301P	not provided|Monogenic diabetes	Conflicting interpretations of pathogenicity
Clinvar	KCNJ8	R30S	Cardiovascular phenotype|Brugada syndrome	Uncertain significance
Clinvar	KCNJ2	R218W	Congenital long QT syndrome|Short QT syndrome 3|Andersen Tawil syndrome|not provided|Andersen Tawil syndrome	Pathogenic
Clinvar	KCNJ2	R260C	not provided	Uncertain significance
Clinvar	KCNJ5	R319Q	Familial hyperaldosteronism type 3	Uncertain significance
Clinvar	KCNJ5	R319W	not provided	Uncertain significance
Clinvar	KCNJ11	R31W	Maturity-onset diabetes of the young, type 13|Hyperinsulinemic hypoglycemia, familial, 2|Transient neonatal diabetes mellitus 3	Uncertain significance
Clinvar	KCNJ2	R260P	not provided|Congenital long QT syndrome	Pathogenic
Clinvar	KCNJ2	R312C	not provided|Andersen Tawil syndrome|Short QT syndrome 3|Congenital long QT syndrome	Pathogenic
Clinvar	KCNJ11	R325S	not specified|not provided|Permanent neonatal diabetes mellitus|Transient neonatal diabetes mellitus 3|Hyperinsulinemic hypoglycemia, familial, 2|Type 2 diabetes mellitus|Maturity-onset diabetes of the young, type 13	Uncertain significance
Clinvar	KCNJ10	R343C	not provided|EAST syndrome	Uncertain significance
Clinvar	KCNJ10	R343H	EAST syndrome	Uncertain significance
Clinvar	KCNJ11	R347H	Hyperinsulinemic hypoglycemia, familial, 2|Permanent neonatal diabetes mellitus|Maturity-onset diabetes of the young, type 13|not provided|Monogenic diabetes|Hyperinsulinemic hypoglycemia, familial, 2|Permanent neonatal diabetes mellitus|Transient neonatal diabetes mellitus 3	Uncertain significance
Clinvar	KCNJ10	R348C	KCNJ10-Related Disorders|not specified|not provided|EAST syndrome|Deafness, autosomal recessive 4, with enlarged vestibular aqueduct	Conflicting interpretations of pathogenicity
Clinvar	KCNJ10	R348H	not specified|not provided|Intellectual disability|Deafness, autosomal recessive 4, with enlarged vestibular aqueduct|History of neurodevelopmental disorder|Deafness, autosomal recessive 4, with enlarged vestibular aqueduct|EAST syndrome|Pendred syndrome|EAST syndrome	Uncertain significance
Clinvar	KCNJ11	R34C	Permanent neonatal diabetes mellitus|Transient neonatal diabetes mellitus 3|Hyperinsulinemic hypoglycemia, familial, 2	Pathogenic
Clinvar	KCNJ11	R34H	Permanent neonatal diabetes mellitus|not provided	Pathogenic
Clinvar	KCNJ11	R365C	not provided|Hyperinsulinemic hypoglycemia, familial, 2|Transient neonatal diabetes mellitus 3|Permanent neonatal diabetes mellitus	Uncertain significance
Clinvar	KCNJ11	R365H	Transient neonatal diabetes mellitus 3|Hyperinsulinemic hypoglycemia, familial, 2|Permanent neonatal diabetes mellitus	Uncertain significance
Clinvar	KCNJ10	R36C	EAST syndrome	Uncertain significance
Clinvar	KCNJ10	R36H	EAST syndrome	Uncertain significance
Clinvar	KCNJ11	R371H	Hyperinsulinemic hypoglycemia, familial, 2|Permanent neonatal diabetes mellitus|Transient neonatal diabetes mellitus 3	Uncertain significance
Clinvar	KCNJ10	R375C	not provided|Deafness, autosomal recessive 4, with enlarged vestibular aqueduct|EAST syndrome	Uncertain significance
Clinvar	KCNJ10	R375H	History of neurodevelopmental disorder|EAST syndrome	Uncertain significance
Clinvar	KCNJ5	R375Q	Long QT syndrome	Uncertain significance
Clinvar	KCNJ5	R375W	not provided|Long QT syndrome	Uncertain significance
Clinvar	KCNJ8	R394S	Cardiac arrhythmia|Brugada syndrome	Uncertain significance
Clinvar	KCNJ2	R312H	Andersen Tawil syndrome|Short QT syndrome 3|not provided	Conflicting interpretations of pathogenicity
Clinvar	KCNJ2	R325C	Ventricular fibrillation|Andersen Tawil syndrome|Short QT syndrome 3|Andersen Tawil syndrome|not provided	Uncertain significance
Clinvar	KCNJ5	R416S	not provided	Uncertain significance
Clinvar	KCNJ5	R41C	Cardiovascular phenotype|Long QT syndrome|Primary dilated cardiomyopathy|Congenital long QT syndrome|not specified|not provided|Long QT syndrome|Familial hyperaldosteronism type 3	Benign
Clinvar	KCNJ5	R41H	Long QT syndrome|not provided	Benign
Clinvar	KCNJ2	R325H	not provided	Uncertain significance
Clinvar	KCNJ2	R40P	Short QT syndrome 3|Andersen Tawil syndrome	Uncertain significance
Clinvar	KCNJ13	R42P	Leber congenital amaurosis 16	Uncertain significance
Clinvar	KCNJ18	R43C	Thyrotoxic periodic paralysis, susceptibility to, 1	Pathogenic
Clinvar	KCNJ10	R48C	EAST syndrome|not provided	Uncertain significance
Clinvar	KCNJ10	R48P	EAST syndrome	Uncertain significance
Clinvar	KCNJ11	R136S	not provided	Uncertain significance
Clinvar	KCNJ11	R4C	Permanent neonatal diabetes mellitus	Uncertain significance
Clinvar	KCNJ11	R4S	not provided	Uncertain significance
Clinvar	KCNJ5	R50C	Long QT syndrome	Uncertain significance
Clinvar	KCNJ11	R50P	Permanent neonatal diabetes mellitus|Permanent neonatal diabetes mellitus 2	Pathogenic
Clinvar	KCNJ11	R50Q	Neonatal diabetes mellitus|not provided	Pathogenic
Clinvar	KCNJ5	R52H	Long QT syndrome	Uncertain significance
Clinvar	KCNJ11	R54C	not provided	Pathogenic
Clinvar	KCNJ13	R54H	not provided	Uncertain significance
Clinvar	KCNJ11	R54H	Hyperinsulinemic hypoglycemia, familial, 2	Uncertain significance
Clinvar	KCNJ2	R40Q	Atrial fibrillation, familial, 9|SUDDEN INFANT DEATH SYNDROME|Short QT syndrome 3|Andersen Tawil syndrome|not provided|Andersen Tawil syndrome|Short QT syndrome 3	Uncertain significance
Clinvar	KCNJ10	R65C	EAST syndrome	Pathogenic
Clinvar	KCNJ10	R65P	Renal tubular dysfunction|Bilateral sensorineural hearing impairment|Cerebellar ataxia|Spastic diplegia|Microcephaly|EAST syndrome	Pathogenic
Clinvar	KCNJ2	R422L	Congenital long QT syndrome	Uncertain significance
Clinvar	KCNJ1	R6W	not provided|Bartter syndrome, type 2, antenatal	Uncertain significance
Clinvar	KCNJ5	R72W	Long QT syndrome	Uncertain significance
Clinvar	KCNJ2	R423Q	Long QT syndrome|Short QT syndrome 3|Andersen Tawil syndrome	Uncertain significance
Clinvar	KCNJ2	R5Q	Andersen Tawil syndrome|Short QT syndrome 3	Uncertain significance
Clinvar	KCNJ2	R67Q	Andersen Tawil syndrome|Short QT syndrome 3|not specified|not provided|Congenital long QT syndrome	Pathogenic
Clinvar	KCNJ2	R67W	Short QT syndrome 3|Andersen Tawil syndrome|Atrial fibrillation, familial, 9|not specified|Congenital long QT syndrome|Short QT syndrome 3|Andersen Tawil syndrome|not provided|Andersen Tawil syndrome	Pathogenic
Clinvar	KCNJ5	R87H	Long QT syndrome	Uncertain significance
Clinvar	KCNJ2	R80C	Andersen Tawil syndrome|Short QT syndrome 3	Uncertain significance
Clinvar	KCNJ2	R80H	Short QT syndrome 3|Andersen Tawil syndrome	Uncertain significance
Clinvar	KCNJ11	S103R	Permanent neonatal diabetes mellitus	Uncertain significance
Clinvar	KCNJ13	S105I	Leber congenital amaurosis 16	Pathogenic
Clinvar	KCNJ2	R82Q	not provided|Andersen Tawil syndrome|Short QT syndrome 3|Andersen Tawil syndrome|Cardiovascular phenotype|Congenital long QT syndrome	Pathogenic
Clinvar	KCNJ11	S116P	not provided	Uncertain significance
Clinvar	KCNJ11	S118L	not specified	Uncertain significance
Clinvar	KCNJ2	R82W	Ventricular tachycardia|not provided|Supraventricular tachycardia|Andersen Tawil syndrome|Short QT syndrome 3|Andersen Tawil syndrome	Pathogenic
Clinvar	KCNJ1	S219R	Bartter syndrome, type 2, antenatal	Pathogenic
Clinvar	KCNJ2	R8C	Short QT syndrome 3|Andersen Tawil syndrome|Short QT syndrome 3|Atrial fibrillation, familial, 9|Andersen Tawil syndrome	Uncertain significance
Clinvar	KCNJ13	S230N	Leber congenital amaurosis 16|not provided	Uncertain significance
Clinvar	KCNJ11	S331C	not specified	Uncertain significance
Clinvar	KCNJ2	R8H	Andersen Tawil syndrome|Short QT syndrome 3	Uncertain significance
Clinvar	KCNJ11	S265I	Monogenic diabetes	Uncertain significance
Clinvar	KCNJ2	S116P	not provided	Uncertain significance
Clinvar	KCNJ11	S327Y	not provided|not specified	Uncertain significance
Clinvar	KCNJ10	S338A	EAST syndrome	Uncertain significance
Clinvar	KCNJ10	S345G	EAST syndrome	Uncertain significance
Clinvar	KCNJ2	S136F	Congenital long QT syndrome	Uncertain significance
Clinvar	KCNJ11	S385C	Neonatal diabetes mellitus|Maturity-onset diabetes of the young, type 13|not specified|Hyperinsulinemic hypoglycemia, familial, 2|Monogenic diabetes|Transient neonatal diabetes mellitus 3|not provided	Conflicting interpretations of pathogenicity
Clinvar	KCNJ2	S220N	Andersen Tawil syndrome|Short QT syndrome 3	Uncertain significance
Clinvar	KCNJ2	S265F	Andersen Tawil syndrome	Uncertain significance
Clinvar	KCNJ2	S314F	not provided	Uncertain significance
Clinvar	KCNJ11	S3C	Neonatal insulin-dependent diabetes mellitus	Pathogenic
Clinvar	KCNJ8	S422L	Cardiovascular phenotype|Brugada syndrome|not provided|Hypertrophic cardiomyopathy	Benign
Clinvar	KCNJ11	S82N	not provided	Uncertain significance
Clinvar	KCNJ8	T118I	Brugada syndrome 1	Uncertain significance
Clinvar	KCNJ10	T12N	EAST syndrome	Uncertain significance
Clinvar	KCNJ2	S369L	not provided	Uncertain significance
Clinvar	KCNJ2	S397N	Short QT syndrome 3|Andersen Tawil syndrome	Uncertain significance
Clinvar	KCNJ2	S399N	Andersen Tawil syndrome|Short QT syndrome 3	Uncertain significance
Clinvar	KCNJ18	T140M	Thyrotoxic periodic paralysis, susceptibility to, 1	Pathogenic
Clinvar	KCNJ13	T153I	Leber congenital amaurosis|Leber congenital amaurosis 16	Pathogenic
Clinvar	KCNJ5	T158A	Aldosterone-producing adrenal adenoma, somatic|Familial hyperaldosteronism type 3|Andersen Tawil syndrome	Pathogenic
Clinvar	KCNJ10	T164I	EAST syndrome	Pathogenic
Clinvar	KCNJ13	T175I	Leber congenital amaurosis 16|not provided	Benign
Clinvar	KCNJ5	T18I	Long QT syndrome	Uncertain significance
Clinvar	KCNJ2	S399T	Andersen Tawil syndrome|Andersen Tawil syndrome|Short QT syndrome 3	Uncertain significance
Clinvar	KCNJ2	T130A	Andersen Tawil syndrome	Uncertain significance
Clinvar	KCNJ1	T191M	Bartter syndrome, type 2, antenatal	Benign
Clinvar	KCNJ1	T234I	not provided	Uncertain significance
Clinvar	KCNJ11	T302I	Permanent neonatal diabetes mellitus	Uncertain significance
Clinvar	KCNJ10	T220S	EAST syndrome	Uncertain significance
Clinvar	KCNJ8	T234I	Brugada syndrome	Uncertain significance
Clinvar	KCNJ10	T242I	EAST syndrome	Uncertain significance
Clinvar	KCNJ13	T327A	not provided	Uncertain significance
Clinvar	KCNJ13	T337I	not provided	Uncertain significance
Clinvar	KCNJ1	T300R	Bartter syndrome, type 2, antenatal	Uncertain significance
Clinvar	KCNJ10	T286R	EAST syndrome	Uncertain significance
Clinvar	KCNJ10	T293I	EAST syndrome	Uncertain significance
Clinvar	KCNJ11	T294M	Transient neonatal diabetes mellitus 3|Type 2 diabetes mellitus|Hyperinsulinemic hypoglycemia, familial, 2|Permanent neonatal diabetes mellitus 2|Maturity-onset diabetes of the young, type 13|Hyperinsulinemic hypoglycemia, familial, 2|Transient neonatal diabetes mellitus 3|not provided	Pathogenic
Clinvar	KCNJ10	T2R	EAST syndrome	Uncertain significance
Clinvar	KCNJ1	T300I	Bartter syndrome, type 2, antenatal	Uncertain significance
Clinvar	KCNJ2	T130M	not provided|Short QT syndrome 3|Andersen Tawil syndrome	Uncertain significance
Clinvar	KCNJ2	T139I	Short QT syndrome 3|Andersen Tawil syndrome|not provided	Uncertain significance
Clinvar	KCNJ2	T192A	Andersen Tawil syndrome|Congenital long QT syndrome	Pathogenic
Clinvar	KCNJ2	T192I	Congenital long QT syndrome	Uncertain significance
Clinvar	KCNJ11	T345M	Maturity-onset diabetes of the young, type 13|Hyperinsulinemic hypoglycemia, familial, 2|Transient neonatal diabetes mellitus 3	Conflicting interpretations of pathogenicity
Clinvar	KCNJ18	T354M	Thyrotoxic periodic paralysis, susceptibility to, 1|Thyrotoxic periodic paralysis 2	Pathogenic
Clinvar	KCNJ2	T305A	Andersen Tawil syndrome|Andersen Tawil syndrome|Short QT syndrome 3|Cardiac arrhythmia	Pathogenic
Clinvar	KCNJ2	T305P	Andersen Tawil syndrome|Congenital long QT syndrome	Pathogenic
Clinvar	KCNJ5	T40M	Long QT syndrome	Uncertain significance
Clinvar	KCNJ1	T71M	Bartter syndrome, type 2, antenatal	Uncertain significance
Clinvar	KCNJ11	T62M	not specified	Pathogenic
Clinvar	KCNJ11	T62R	Dermatitis, atopic|Hypertrichosis|Hyperinsulinemia|Hypoglycemia	Pathogenic
Clinvar	KCNJ1	T86A	Antenatal Bartter Syndrome|not provided	Benign
Clinvar	KCNJ2	T308S	Short QT syndrome 3|Andersen Tawil syndrome	Uncertain significance
Clinvar	KCNJ10	T74I	not provided|EAST syndrome	Conflicting interpretations of pathogenicity
Clinvar	KCNJ2	T309I	Congenital long QT syndrome	Uncertain significance
Clinvar	KCNJ2	T400M	not provided|Cardiovascular phenotype|Long QT syndrome	Uncertain significance
Clinvar	KCNJ2	T402M	not specified|Andersen Tawil syndrome|Short QT syndrome 3|Cardiovascular phenotype	Uncertain significance
Clinvar	KCNJ11	T180N	Transient neonatal diabetes mellitus 3	Uncertain significance
Clinvar	KCNJ10	V112G	EAST syndrome	Uncertain significance
Clinvar	KCNJ10	V112L	EAST syndrome	Uncertain significance
Clinvar	KCNJ2	T74A	Congenital long QT syndrome	Uncertain significance
Clinvar	KCNJ11	V138L	not provided	Uncertain significance
Clinvar	KCNJ11	V151M	Maturity-onset diabetes of the young, type 13|Transient neonatal diabetes mellitus 3|Hyperinsulinemic hypoglycemia, familial, 2	Conflicting interpretations of pathogenicity
Clinvar	KCNJ11	V155M	Transient neonatal diabetes mellitus 3|Permanent neonatal diabetes mellitus|Hyperinsulinemic hypoglycemia, familial, 2|Permanent neonatal diabetes mellitus|Diabetes mellitus	Uncertain significance
Clinvar	KCNJ2	T75A	Congenital long QT syndrome	Uncertain significance
Clinvar	KCNJ2	T75M	not provided|Andersen Tawil syndrome|Short QT syndrome 3|Congenital long QT syndrome	Pathogenic
Clinvar	KCNJ18	V168M	Thyrotoxic periodic paralysis, susceptibility to, 1	Pathogenic
Clinvar	KCNJ5	V178I	Long QT syndrome	Uncertain significance
Clinvar	KCNJ13	V268A	not provided	Uncertain significance
Clinvar	KCNJ8	V201I	Brugada syndrome	Uncertain significance
Clinvar	KCNJ2	T75R	Andersen Tawil syndrome|Congenital long QT syndrome	Pathogenic
Clinvar	KCNJ2	V123G	Congenital long QT syndrome	Uncertain significance
Clinvar	KCNJ10	V240A	EAST syndrome	Uncertain significance
Clinvar	KCNJ8	V240A	Brugada syndrome	Uncertain significance
Clinvar	KCNJ13	V322A	not provided	Uncertain significance
Clinvar	KCNJ11	V252A	Permanent neonatal diabetes mellitus	Pathogenic
Clinvar	KCNJ11	V285I	Hyperinsulinemic hypoglycemia, familial, 2|Permanent neonatal diabetes mellitus|Transient neonatal diabetes mellitus 3	Uncertain significance
Clinvar	KCNJ11	V373M	Permanent neonatal diabetes mellitus|not provided	Benign
Clinvar	KCNJ11	V290M	Hyperinsulinemic hypoglycemia, familial, 2	Pathogenic
Clinvar	KCNJ2	V161M	Andersen Tawil syndrome|Short QT syndrome 3	Uncertain significance
Clinvar	KCNJ2	V167L	Andersen Tawil syndrome|Short QT syndrome 3	Uncertain significance
Clinvar	KCNJ5	V301D	Long QT syndrome	Uncertain significance
Clinvar	KCNJ2	V223G	Short QT syndrome 3|Andersen Tawil syndrome	Uncertain significance
Clinvar	KCNJ10	V333A	not provided|EAST syndrome	Uncertain significance
Clinvar	KCNJ8	V334A	Cardiovascular phenotype|SUDDEN INFANT DEATH SYNDROME|not specified|Brugada syndrome	Benign
Clinvar	KCNJ10	V336L	not provided|EAST syndrome	Uncertain significance
Clinvar	KCNJ10	V336M	not provided	Uncertain significance
Clinvar	KCNJ11	V339G	Transient neonatal diabetes mellitus 3|Type 2 diabetes mellitus|Maturity-onset diabetes of the young, type 13|Permanent neonatal diabetes mellitus|Hyperinsulinemic hypoglycemia, familial, 2|Transient neonatal diabetes mellitus 3|Permanent neonatal diabetes mellitus|Hyperinsulinemic hypoglycemia, familial, 2	Uncertain significance
Clinvar	KCNJ8	V346I	not provided|not specified|Brugada syndrome	Conflicting interpretations of pathogenicity
Clinvar	KCNJ10	V39M	not provided	Pathogenic
Clinvar	KCNJ11	V44M	not specified	Uncertain significance
Clinvar	KCNJ10	V4I	not specified	Uncertain significance
Clinvar	KCNJ2	V227F	Ventricular tachycardia	Uncertain significance
Clinvar	KCNJ11	V59G	Permanent neonatal diabetes mellitus|Permanent neonatal diabetes mellitus 2	Pathogenic
Clinvar	KCNJ11	V59M	Permanent neonatal diabetes mellitus|Permanent neonatal diabetes mellitus 2|not provided|Neonatal insulin-dependent diabetes mellitus	Pathogenic
Clinvar	KCNJ5	V62M	Long QT syndrome	Uncertain significance
Clinvar	KCNJ8	V65M	not provided	Uncertain significance
Clinvar	KCNJ10	V7A	EAST syndrome	Uncertain significance
Clinvar	KCNJ10	V84M	EAST syndrome|not provided	Uncertain significance
Clinvar	KCNJ2	V295A	not provided	Uncertain significance
Clinvar	KCNJ13	V8L	not provided	Uncertain significance
Clinvar	KCNJ5	V92I	Long QT syndrome	Uncertain significance
Clinvar	KCNJ2	V295M	Andersen Tawil syndrome|Short QT syndrome 3	Uncertain significance
Clinvar	KCNJ5	V99I	Long QT syndrome	Uncertain significance
Clinvar	KCNJ13	W45S	not provided	Uncertain significance
Clinvar	KCNJ11	W83S	not specified	Uncertain significance
Clinvar	KCNJ13	Y102C	not provided	Uncertain significance
Clinvar	KCNJ13	Y218H	not provided	Uncertain significance
Clinvar	KCNJ2	V302M	Andersen Tawil syndrome|Congenital long QT syndrome	Pathogenic
Clinvar	KCNJ5	Y152C	Familial hyperaldosteronism type 3	Uncertain significance
Clinvar	KCNJ1	Y227C	not provided	Uncertain significance
Clinvar	KCNJ11	Y268F	Transient neonatal diabetes mellitus 3	Uncertain significance
Clinvar	KCNJ10	Y323H	Peripheral neuropathy	Uncertain significance
Clinvar	KCNJ2	V56I	not provided	Uncertain significance
Clinvar	KCNJ11	Y330C	Neonatal insulin-dependent diabetes mellitus|Permanent neonatal diabetes mellitus	Pathogenic
Clinvar	KCNJ11	Y330F	not provided	Uncertain significance
Clinvar	KCNJ11	Y330H	Diabetes mellitus	Pathogenic
Clinvar	KCNJ10	Y349C	EAST syndrome	Uncertain significance
Clinvar	KCNJ2	V86F	not provided	Uncertain significance
Clinvar	KCNJ1	Y100C	not provided	Uncertain significance
Clinvar	KCNJ16	T64I	HYPOKALEMIC TUBULOPATHY AND DEAFNESS	Pathogenic
Clinvar	KCNJ16	I132R	HYPOKALEMIC TUBULOPATHY AND DEAFNESS	Pathogenic
Clinvar	KCNJ16	G135A	HYPOKALEMIC TUBULOPATHY AND DEAFNESS	Pathogenic
Clinvar	KCNJ16	R137C	HYPOKALEMIC TUBULOPATHY AND DEAFNESS	Pathogenic
Clinvar	KCNJ16	P250L	HYPOKALEMIC TUBULOPATHY AND DEAFNESS	Pathogenic
Clinvar	KCNJ2	V93I	Atrial fibrillation|Short QT syndrome 3|Andersen Tawil syndrome|not provided|Atrial fibrillation, familial, 9|Andersen Tawil syndrome|Short QT syndrome 3	Conflicting interpretations of pathogenicity
Clinvar	KCNJ2	W322C	Andersen Tawil syndrome	Pathogenic
Clinvar	KCNJ2	Y145C	Andersen Tawil syndrome|Short QT syndrome 3	Pathogenic
Clinvar	KCNJ2	Y326N	not provided	Uncertain significance
Clinvar	KCNJ2	Y68D	Congenital long QT syndrome	Uncertain significance
