# Supplementary material for: Determinants of trafficking, conduction, and disease within a K+ channel revealed through multiparametric deep mutational scanning
Source: eLife journal article supplement (doi:10.7554/elife.76903), 2022-05-31
Supplement: supp [file KCNJ_Clinvar_0325322(original_annotations).xlsx]

## Sheet: clinvar_result-6
Name	Gene(s)	Protein change	Condition(s)	Clinical significance (Last reviewed)	Review status	Accession	GRCh37Chromosome	GRCh37Location	GRCh38Chromosome	GRCh38Location	VariationID	AlleleID(s)	dbSNP ID	Canonical SPDI
NM_000525.4(KCNJ11):c.67A>G (p.Lys23Glu)	ABCC8|KCNJ11	K23E	Transient Neonatal Diabetes, Dominant|Hyperinsulinism, Dominant/Recessive|Maturity-onset diabetes of the young, type 13|not specified|Maturity onset diabetes mellitus in young|not provided|Diabetes mellitus type 2, susceptibility to|Transient neonatal diabetes mellitus 3|Exercise stress response, impaired, association with|Hyperinsulinemic hypoglycemia, familial, 2|Permanent neonatal diabetes mel…	Benign/Likely benign(Last reviewed: Nov 25, 2020)	criteria provided, multiple submitters, no conflicts	VCV000008678	11	17409572	11	17388025	8678	23717	rs5219	NC_000011.10:17388024:T:C
NM_002242.4(KCNJ13):c.827A>C (p.Glu276Ala)	GIGYF2|KCNJ13	E196A, E276A	not provided	Benign(Last reviewed: Oct 19, 2020)	criteria provided, single submitter	VCV001169670	2	233633157	2	232768447	1169670	1154067		NC_000002.12:232768446:T:G
NM_002242.4(KCNJ13):c.779A>G (p.Glu260Gly)	GIGYF2|KCNJ13	E180G, E260G	not provided	Uncertain significance(Last reviewed: Mar 18, 2020)	criteria provided, single submitter	VCV001061605	2	233633205	2	232768495	1061605	1041204		NC_000002.12:232768494:T:C
NM_002242.4(KCNJ13):c.709T>C (p.Phe237Leu)	GIGYF2|KCNJ13	F237L, F157L	not provided	Uncertain significance(Last reviewed: Mar 15, 2020)	criteria provided, single submitter	VCV001035494	2	233633275	2	232768565	1035494	1024249	rs1699076484	NC_000002.12:232768564:A:G
NM_002242.4(KCNJ13):c.803T>C (p.Val268Ala)	GIGYF2|KCNJ13	V188A, V268A	not provided	Uncertain significance(Last reviewed: Oct 7, 2020)	criteria provided, single submitter	VCV001023971	2	233633181	2	232768471	1023971	1003794	rs368221882	NC_000002.12:232768470:A:G
NM_002242.4(KCNJ13):c.305A>G (p.Tyr102Cys)	GIGYF2|KCNJ13	Y102C, Y22C	not provided	Uncertain significance(Last reviewed: May 6, 2020)	criteria provided, single submitter	VCV001017594	2	233635768	2	232771058	1017594	1003798	rs776705101	NC_000002.12:232771057:T:C
NM_002242.4(KCNJ13):c.1010C>T (p.Thr337Ile)	GIGYF2|KCNJ13	T257I, T337I	not provided	Uncertain significance(Last reviewed: Jul 29, 2020)	criteria provided, single submitter	VCV001015818	2	233632974	2	232768264	1015818	1003791	rs1699057942	NC_000002.12:232768263:G:A
NM_002242.4(KCNJ13):c.479T>C (p.Ile160Thr)	GIGYF2|KCNJ13	I160T, I80T	not provided	Uncertain significance(Last reviewed: Aug 26, 2020)	criteria provided, single submitter	VCV001014231	2	233633505	2	232768795	1014231	1003796	rs564363265	NC_000002.12:232768794:A:G
NM_002242.4(KCNJ13):c.979A>G (p.Thr327Ala)	GIGYF2|KCNJ13	T247A, T327A	not provided	Uncertain significance(Last reviewed: Aug 8, 2020)	criteria provided, single submitter	VCV001013931	2	233633005	2	232768295	1013931	1003792	rs1574856135	NC_000002.12:232768294:T:C
NM_002242.4(KCNJ13):c.584G>A (p.Arg195Gln)	GIGYF2|KCNJ13	R115Q, R195Q	not provided|Snowflake vitreoretinal degeneration	Uncertain significance(Last reviewed: Nov 1, 2020)	criteria provided, multiple submitters, no conflicts	VCV001012689	2	233633400	2	232768690	1012689	1000330	rs1699085050	NC_000002.12:232768689:C:T
NM_002242.4(KCNJ13):c.866T>C (p.Leu289Pro)	GIGYF2|KCNJ13	L209P, L289P	not provided	Uncertain significance(Last reviewed: Nov 1, 2020)	criteria provided, single submitter	VCV001012688	2	233633118	2	232768408	1012688	1000329	rs1699068123	NC_000002.12:232768407:A:G
NM_002242.4(KCNJ13):c.184G>T (p.Ala62Ser)	GIGYF2|KCNJ13	A62S	not provided	Uncertain significance(Last reviewed: Sep 5, 2020)	criteria provided, single submitter	VCV001012037	2	233635889	2	232771179	1012037	988503	rs1699230142	NC_000002.12:232771178:C:A
NM_002242.4(KCNJ13):c.707T>A (p.Phe236Tyr)	GIGYF2|KCNJ13	F156Y, F236Y	not provided	Uncertain significance(Last reviewed: Jan 15, 2020)	criteria provided, single submitter	VCV000999076	2	233633277	2	232768567	999076	988501	rs1346994563	NC_000002.12:232768566:A:T
NM_002242.4(KCNJ13):c.781A>C (p.Asn261His)	GIGYF2|KCNJ13	N261H, N181H	not provided	Uncertain significance(Last reviewed: Jul 13, 2020)	criteria provided, single submitter	VCV000971274	2	233633203	2	232768493	971274	952986	rs772086040	NC_000002.12:232768492:T:G
NM_002242.4(KCNJ13):c.69G>C (p.Lys23Asn)	GIGYF2|KCNJ13	K23N	not provided	Uncertain significance(Last reviewed: Oct 16, 2019)	criteria provided, single submitter	VCV000966568	2	233636004	2	232771294	966568	952987	rs1261649348	NC_000002.12:232771293:C:G
NM_002242.4(KCNJ13):c.608G>A (p.Arg203Gln)	GIGYF2|KCNJ13	R203Q, R123Q	not provided	Uncertain significance(Last reviewed: Nov 18, 2019)	criteria provided, single submitter	VCV000958642	2	233633376	2	232768666	958642	942679	rs867979727	NC_000002.12:232768665:C:T
NM_002242.4(KCNJ13):c.379C>T (p.Pro127Ser)	GIGYF2|KCNJ13	P127S, P47S	not provided	Uncertain significance(Last reviewed: Oct 4, 2019)	criteria provided, single submitter	VCV000943477	2	233635694	2	232770984	943477	931207	rs1699222183	NC_000002.12:232770983:G:A
NM_002242.4(KCNJ13):c.558T>G (p.Asn186Lys)	GIGYF2|KCNJ13	N106K, N186K	not provided	Uncertain significance(Last reviewed: Oct 2, 2019)	criteria provided, single submitter	VCV000942561	2	233633426	2	232768716	942561	931205	rs886043769	NC_000002.12:232768715:A:C
NM_002242.4(KCNJ13):c.431T>C (p.Leu144Pro)	GIGYF2|KCNJ13	L144P, L64P	Leber congenital amaurosis 16	Uncertain significance	no assertion criteria provided	VCV000916717	2	233635642	2	232770932	916717	905049	rs1361858388	NC_000002.12:232770931:A:G
NM_002242.4(KCNJ13):c.485G>A (p.Arg162Gln)	GIGYF2|KCNJ13	R162Q, R82Q	not provided|Leber congenital amaurosis 16	Uncertain significance(Last reviewed: Sep 26, 2020)	criteria provided, multiple submitters, no conflicts	VCV000899321	2	233633499	2	232768789	899321	884185	rs757304681	NC_000002.12:232768788:C:T
NM_002242.4(KCNJ13):c.125G>C (p.Arg42Pro)	GIGYF2|KCNJ13	R42P	Leber congenital amaurosis 16	Uncertain significance(Last reviewed: Jan 13, 2018)	criteria provided, single submitter	VCV000895231	2	233635948	2	232771238	895231	884188	rs1699233151	NC_000002.12:232771237:C:G
NM_002242.4(KCNJ13):c.242T>C (p.Met81Thr)	GIGYF2|KCNJ13	M1T, M81T	Leber congenital amaurosis 16	Uncertain significance(Last reviewed: Jan 13, 2018)	criteria provided, single submitter	VCV000895229	2	233635831	2	232771121	895229	884186	rs371256707	NC_000002.12:232771120:A:G
NM_002242.4(KCNJ13):c.27T>G (p.Ile9Met)	GIGYF2|KCNJ13	I9M	Retinal dystrophy	Uncertain significance(Last reviewed: Sep 4, 2018)	criteria provided, single submitter	VCV000866179	2	233636046	2	232771336	866179	856156	rs143726189	NC_000002.12:232771335:A:C
NM_002242.4(KCNJ13):c.341T>C (p.Leu114Pro)	GIGYF2|KCNJ13	L114P, L34P	Retinal dystrophy|not provided	Uncertain significance(Last reviewed: Mar 25, 2020)	criteria provided, multiple submitters, no conflicts	VCV000866139	2	233635732	2	232771022	866139	856155	rs1401218860	NC_000002.12:232771021:A:G
NM_002242.4(KCNJ13):c.134G>C (p.Trp45Ser)	GIGYF2|KCNJ13	W45S	not provided	Uncertain significance(Last reviewed: Feb 22, 2020)	criteria provided, single submitter	VCV000862315	2	233635939	2	232771229	862315	825967	rs1699232907	NC_000002.12:232771228:C:G
NM_002242.4(KCNJ13):c.161G>A (p.Arg54His)	GIGYF2|KCNJ13	R54H	not provided	Uncertain significance(Last reviewed: Dec 12, 2019)	criteria provided, single submitter	VCV000855246	2	233635912	2	232771202	855246	825966	rs1699230982	NC_000002.12:232771201:C:T
NM_002242.4(KCNJ13):c.905T>C (p.Leu302Pro)	GIGYF2|KCNJ13	L222P, L302P	not provided	Uncertain significance(Last reviewed: Jan 3, 2020)	criteria provided, single submitter	VCV000844853	2	233633079	2	232768369	844853	825964	rs954056272	NC_000002.12:232768368:A:G
NM_002242.4(KCNJ13):c.700T>A (p.Cys234Ser)	GIGYF2|KCNJ13	C154S, C234S	not provided	Uncertain significance(Last reviewed: Dec 28, 2019)	criteria provided, single submitter	VCV000842487	2	233633284	2	232768574	842487	825965	rs1699077176	NC_000002.12:232768573:A:T
NM_002242.4(KCNJ13):c.474G>A (p.Ala158=)	GIGYF2|KCNJ13	E80K	Leber congenital amaurosis 16|not provided	Conflicting interpretations of pathogenicity(Last reviewed: Nov 4, 2020)	criteria provided, conflicting interpretations	VCV000335057	2	233633510	2	232768800	335057	288343	rs769501717	NC_000002.12:232768799:C:T
NM_002242.4(KCNJ13):c.458C>T (p.Thr153Ile)	GIGYF2|KCNJ13	T153I, T73I	Leber congenital amaurosis|Leber congenital amaurosis 16	Likely pathogenic(Last reviewed: Nov 20, 2012)	criteria provided, single submitter	VCV000216947	2	233635615	2	232770905	216947	213535	rs863224884	NC_000002.12:232770904:G:A
NM_002242.4(KCNJ13):c.473C>T (p.Ala158Val)	GIGYF2|KCNJ13	A158V, A78V	not provided	Uncertain significance(Last reviewed: May 6, 2014)	criteria provided, single submitter	VCV000167203	2	233633511	2	232768801	167203	177210	rs727503972	NC_000002.12:232768800:G:A
NM_002242.4(KCNJ13):c.632A>G (p.Glu211Gly)	GIGYF2|KCNJ13	E211G, E131G	not provided	Uncertain significance(Last reviewed: Apr 3, 2014)	criteria provided, single submitter	VCV000167202	2	233633352	2	232768642	167202	176947	rs727503971	NC_000002.12:232768641:T:C
NM_002242.4(KCNJ13):c.722T>C (p.Leu241Pro)	GIGYF2|KCNJ13	L241P, L161P	Leber congenital amaurosis 16	Pathogenic(Last reviewed: Jul 15, 2011)	no assertion criteria provided	VCV000030332	2	233633262	2	232768552	30332	39288	rs143607153	NC_000002.12:232768551:A:G
NM_002242.4(KCNJ13):c.496C>T (p.Arg166Ter)	GIGYF2|KCNJ13	R166*, S87L, R86*	Leber congenital amaurosis 16	Pathogenic(Last reviewed: Jul 15, 2011)	no assertion criteria provided	VCV000030331	2	233633488	2	232768778	30331	39287	rs387906858	NC_000002.12:232768777:G:A
NM_153766.3(KCNJ1):c.550C>T (p.Arg184Trp)	KCNJ1	R184W, R201W, R203W	Bartter syndrome, type 2, antenatal	Likely pathogenic(Last reviewed: Jan 3, 2022)	criteria provided, single submitter	VCV001333621	11	128709589	11	128839694	1333621	1324392		NC_000011.10:128839693:G:A
NM_153766.3(KCNJ1):c.644C>T (p.Thr215Ile)	KCNJ1	T215I, T232I, T234I	not provided	Uncertain significance(Last reviewed: May 22, 2019)	criteria provided, single submitter	VCV001306000	11	128709495	11	128839600	1306000	1297271		NC_000011.10:128839599:G:A
NM_153766.3(KCNJ1):c.584C>G (p.Ala195Gly)	KCNJ1	A195G, A212G, A214G	not provided	Uncertain significance(Last reviewed: Aug 5, 2020)	criteria provided, single submitter	VCV001055539	11	128709555	11	128839660	1055539	1047109		NC_000011.10:128839659:G:C
NM_153766.3(KCNJ1):c.860C>T (p.Ala287Val)	KCNJ1	A287V, A304V, A306V	not provided	Uncertain significance(Last reviewed: Sep 5, 2020)	criteria provided, single submitter	VCV001053514	11	128709279	11	128839384	1053514	1047108		NC_000011.10:128839383:G:A
NM_153766.3(KCNJ1):c.902T>C (p.Leu301Pro)	KCNJ1	L320P, L301P, L318P	not provided	Uncertain significance(Last reviewed: Jan 17, 2020)	criteria provided, single submitter	VCV001037358	11	128709237	11	128839342	1037358	1030128	rs1424774962	NC_000011.10:128839341:A:G
NM_153766.3(KCNJ1):c.505C>A (p.Arg169Ser)	KCNJ1	R169S, R186S, R188S	not provided	Uncertain significance(Last reviewed: Jan 30, 2020)	criteria provided, single submitter	VCV001011893	11	128709634	11	128839739	1011893	994387	rs138120505	NC_000011.10:128839738:G:T
NM_153766.3(KCNJ1):c.842C>G (p.Thr281Arg)	KCNJ1	T281R, T298R, T300R	Bartter syndrome, type 2, antenatal	Uncertain significance(Last reviewed: Jun 26, 2020)	criteria provided, single submitter	VCV000988597	11	128709297	11	128839402	988597	976530	rs762988627	NC_000011.10:128839401:G:C
NM_153766.3(KCNJ1):c.272C>T (p.Pro91Leu)	KCNJ1	P108L, P110L, P91L	Bartter syndrome, type 2, antenatal	Likely pathogenic(Last reviewed: Sep 9, 2020)	criteria provided, single submitter	VCV000981532	11	128709867	11	128839972	981532	969607	rs373745258	NC_000011.10:128839971:G:A
NM_153766.3(KCNJ1):c.89G>A (p.Cys30Tyr)	KCNJ1	C30Y, C47Y, C49Y	Intellectual disability|Seizures	Uncertain significance(Last reviewed: Feb 26, 2020)	criteria provided, single submitter	VCV000978165	11	128710050	11	128840155	978165	966271	rs764078087	NC_000011.10:128840154:C:T
NM_153766.3(KCNJ1):c.1077C>A (p.Phe359Leu)	KCNJ1	F359L, F376L, F378L	not provided	Uncertain significance(Last reviewed: Oct 4, 2019)	criteria provided, single submitter	VCV000965937	11	128709062	11	128839167	965937	956426	rs1290761147	NC_000011.10:128839166:G:T
NM_153766.3(KCNJ1):c.1116G>A (p.Met372Ile)	KCNJ1	M389I, M372I, M391I	not provided	Uncertain significance(Last reviewed: Jun 28, 2019)	criteria provided, single submitter	VCV000935618	11	128709023	11	128839128	935618	935433	rs141900128	NC_000011.10:128839127:C:T
NM_153766.3(KCNJ1):c.521C>T (p.Thr174Met)	KCNJ1	T193M, T191M, T174M	Bartter syndrome, type 2, antenatal	Benign(Last reviewed: Apr 27, 2017)	criteria provided, single submitter	VCV000879618	11	128709618	11	128839723	879618	867556	rs117535913	NC_000011.10:128839722:G:A
NM_153766.3(KCNJ1):c.706G>A (p.Ala236Thr)	KCNJ1	A236T, A253T, A255T	Bartter syndrome, type 2, antenatal	Uncertain significance(Last reviewed: Jan 13, 2018)	criteria provided, single submitter	VCV000879617	11	128709433	11	128839538	879617	867555	rs147621487	NC_000011.10:128839537:C:T
NM_153766.3(KCNJ1):c.842C>T (p.Thr281Ile)	KCNJ1	T300I, T298I, T281I	Bartter syndrome, type 2, antenatal	Uncertain significance(Last reviewed: Jan 13, 2018)	criteria provided, single submitter	VCV000878156	11	128709297	11	128839402	878156	867553	rs762988627	NC_000011.10:128839401:G:A
NM_153766.3(KCNJ1):c.946G>A (p.Gly316Arg)	KCNJ1	G333R, G335R, G316R	Bartter syndrome, type 2, antenatal	Uncertain significance(Last reviewed: Jan 13, 2018)	criteria provided, single submitter	VCV000878155	11	128709193	11	128839298	878155	867552	rs1943225988	NC_000011.10:128839297:C:T
NM_153766.3(KCNJ1):c.601C>T (p.Leu201Phe)	KCNJ1	L218F, L220F, L201F	Bartter syndrome, type 2, antenatal|not provided	Pathogenic(Last reviewed: Oct 1, 2021)	criteria provided, multiple submitters, no conflicts	VCV000872043	11	128709538	11	128839643	872043	859846	rs200320892	NC_000011.10:128839642:G:A
NM_153766.3(KCNJ1):c.602T>G (p.Leu201Arg)	KCNJ1	L220R, L201R, L218R	Bartter syndrome, type 2, antenatal	Likely pathogenic(Last reviewed: Jul 1, 2018)	criteria provided, single submitter	VCV000870375	11	128709537	11	128839642	870375	858565	rs1411280373	NC_000011.10:128839641:A:C
NM_153766.3(KCNJ1):c.551G>A (p.Arg184Gln)	KCNJ1	R201Q, R203Q, R184Q	Bartter syndrome, type 2, antenatal	Likely pathogenic(Last reviewed: Jul 1, 2018)	criteria provided, single submitter	VCV000870374	11	128709588	11	128839693	870374	858566	rs1380025163	NC_000011.10:128839692:C:T
NM_153766.3(KCNJ1):c.578G>C (p.Arg193Pro)	KCNJ1	R193P, R212P, R210P	not provided	Uncertain significance(Last reviewed: Apr 1, 2019)	criteria provided, single submitter	VCV000845433	11	128709561	11	128839666	845433	838114	rs150299230	NC_000011.10:128839665:C:G
NM_153766.3(KCNJ1):c.354G>T (p.Glu118Asp)	KCNJ1	E118D, E135D, E137D	not provided	Uncertain significance(Last reviewed: Apr 1, 2019)	criteria provided, single submitter	VCV000845432	11	128709785	11	128839890	845432	838115	rs1943250143	NC_000011.10:128839889:C:A
NM_153766.3(KCNJ1):c.-21-2138C>T	KCNJ1	R6W	not provided|Bartter syndrome, type 2, antenatal	Uncertain significance(Last reviewed: Feb 3, 2020)	criteria provided, multiple submitters, no conflicts	VCV000834322	11	128712297	11	128842402	834322	838116	rs34191956	NC_000011.10:128842401:G:A
NM_153766.3(KCNJ1):c.155C>T (p.Thr52Met)	KCNJ1	T52M, T71M, T69M	Bartter syndrome, type 2, antenatal	Uncertain significance(Last reviewed: Aug 29, 2017)	criteria provided, single submitter	VCV000631655	11	128709984	11	128840089	631655	620394	rs373367600	NC_000011.10:128840088:G:A
NM_153766.3(KCNJ1):c.626G>A (p.Gly209Glu)	KCNJ1	G209E, G228E, G226E	Bartter syndrome, type 2, antenatal	Uncertain significance(Last reviewed: Sep 7, 2017)	criteria provided, single submitter	VCV000631654	11	128709513	11	128839618	631654	620393	rs761781140	NC_000011.10:128839617:C:T
NM_153766.3(KCNJ1):c.305G>A (p.Cys102Tyr)	KCNJ1	C102Y, C119Y, C121Y	not provided	Uncertain significance(Last reviewed: Sep 16, 2018)	no assertion criteria provided	VCV000591731	11	128709834	11	128839939	591731	582720	rs1565522472	NC_000011.10:128839938:C:T
NM_153766.3(KCNJ1):c.623A>G (p.Tyr208Cys)	KCNJ1	Y208C, Y227C, Y225C	not provided	Uncertain significance(Last reviewed: Sep 16, 2018)	no assertion criteria provided	VCV000591567	11	128709516	11	128839621	591567	582558	rs1565522061	NC_000011.10:128839620:T:C
NM_153766.3(KCNJ1):c.1000C>T (p.Pro334Ser)	KCNJ1	P334S, P351S, P353S	not provided	Uncertain significance(Last reviewed: Sep 16, 2018)	no assertion criteria provided	VCV000591088	11	128709139	11	128839244	591088	582082	rs1565521547	NC_000011.10:128839243:G:A
NM_153766.3(KCNJ1):c.17G>A (p.Arg6Gln)	KCNJ1	R25Q, R6Q, R23Q	not provided|Bartter syndrome, type 2, antenatal	Conflicting interpretations of pathogenicity(Last reviewed: Oct 19, 2020)	criteria provided, conflicting interpretations	VCV000303577	11	128710122	11	128840227	303577	319381	rs139185738	NC_000011.10:128840226:C:T
NM_153766.3(KCNJ1):c.35G>A (p.Arg12His)	KCNJ1	R12H, R31H, R29H	not provided|Bartter syndrome, type 2, antenatal	Conflicting interpretations of pathogenicity(Last reviewed: Jul 10, 2018)	criteria provided, conflicting interpretations	VCV000303576	11	128710104	11	128840209	303576	326471	rs566704910	NC_000011.10:128840208:C:T
NM_153766.3(KCNJ1):c.568C>T (p.Leu190Phe)	KCNJ1	L190F, L209F, L207F	not provided|Bartter syndrome, type 2, antenatal	Likely benign(Last reviewed: Sep 19, 2018)	criteria provided, multiple submitters, no conflicts	VCV000303574	11	128709571	11	128839676	303574	313256	rs188249669	NC_000011.10:128839675:G:A
NM_153766.3(KCNJ1):c.923C>T (p.Pro308Leu)	KCNJ1	P308L, P327L, P325L	Bartter syndrome, type 2, antenatal	Uncertain significance(Last reviewed: Jan 12, 2018)	criteria provided, single submitter	VCV000303569	11	128709216	11	128839321	303569	326462	rs746292586	NC_000011.10:128839320:G:A
NM_153766.3(KCNJ1):c.1034A>G (p.Asp345Gly)	KCNJ1	D345G, D362G, D364G	not provided	Uncertain significance(Last reviewed: May 29, 2015)	criteria provided, single submitter	VCV000235615	11	128709105	11	128839210	235615	237296	rs748305494	NC_000011.10:128839209:T:C
NM_153766.3(KCNJ1):c.199A>G (p.Thr67Ala)	KCNJ1	T67A, T86A, T84A	Antenatal Bartter Syndrome|not provided	Benign/Likely benign(Last reviewed: Oct 28, 2020)	criteria provided, multiple submitters, no conflicts	VCV000235236	11	128709940	11	128840045	235236	236924	rs41302407	NC_000011.10:128840044:T:C
NM_153766.3(KCNJ1):c.505C>T (p.Arg169Cys)	KCNJ1	R169C, R188C, R186C	not specified|Bartter syndrome, type 2, antenatal	Conflicting interpretations of pathogenicity(Last reviewed: Dec 14, 2016)	criteria provided, conflicting interpretations	VCV000225398	11	128709634	11	128839739	225398	227343	rs138120505	NC_000011.10:128839738:G:A
NM_153766.3(KCNJ1):c.1094A>T (p.Asn365Ile)	KCNJ1	N365I, N382I, N384I	Malignant tumor of prostate	Uncertain significance	no assertion criteria provided	VCV000161825	11	128709045	11	128839150	161825	171501	rs193920958	NC_000011.10:128839149:T:A
NM_153766.3(KCNJ1):c.719A>C (p.Asn240Thr)	KCNJ1	N240T, N259T, N257T	not provided	Uncertain significance	no assertion criteria provided	VCV000064393	11	128709420	11	128839525	64393	75358	rs387907440	NC_000011.10:128839524:T:G
NM_153766.3(KCNJ1):c.262A>G (p.Lys88Glu)	KCNJ1	K88E, K107E, K105E	not provided|Bartter syndrome, type 2, antenatal	Uncertain significance(Last reviewed: Jan 13, 2018)	criteria provided, single submitter	VCV000064392	11	128709877	11	128839982	64392	75357	rs185212943	NC_000011.10:128839981:T:C
NM_153766.3(KCNJ1):c.242A>G (p.Tyr81Cys)	KCNJ1	Y81C, Y100C, Y98C	not provided	Uncertain significance	no assertion criteria provided	VCV000064391	11	128709897	11	128840002	64391	75356	rs387907439	NC_000011.10:128840001:T:C
NM_153766.3(KCNJ1):c.98A>C (p.Glu33Ala)	KCNJ1	E33A, E52A, E50A	not provided	Uncertain significance	no assertion criteria provided	VCV000064390	11	128710041	11	128840146	64390	75355	rs387907438	NC_000011.10:128840145:T:G
NM_153766.3(KCNJ1):c.1028A>C (p.Glu343Ala)	KCNJ1	E343A, E362A, E360A	not provided	Uncertain significance	no assertion criteria provided	VCV000064389	11	128709111	11	128839216	64389	75354	rs387907435	NC_000011.10:128839215:T:G
NM_153766.3(KCNJ1):c.1027G>A (p.Glu343Lys)	KCNJ1	E343K, E362K, E360K	not provided	Uncertain significance	no assertion criteria provided	VCV000064388	11	128709112	11	128839217	64388	75353	rs387907436	NC_000011.10:128839216:C:T
NM_153766.3(KCNJ1):c.315T>A (p.Asn105Lys)	KCNJ1	N105K, N124K, N122K	Bartter syndrome, type 2, antenatal	Pathogenic(Last reviewed: Sep 11, 1998)	no assertion criteria provided	VCV000009162	11	128709824	11	128839929	9162	24201	rs104894251	NC_000011.10:128839928:A:T
NM_153766.3(KCNJ1):c.265G>C (p.Asp89His)	KCNJ1	D108H, D89H, D106H	Bartter syndrome, type 2, antenatal	Pathogenic(Last reviewed: Jan 23, 1997)	no assertion criteria provided	VCV000009161	11	128709874	11	128839979	9161	24200	rs104894250	NC_000011.10:128839978:C:G
NM_153766.3(KCNJ1):c.443G>A (p.Gly148Glu)	KCNJ1	G167E, G148E, G165E	Bartter syndrome, type 2, antenatal	Pathogenic(Last reviewed: Jan 1, 1997)	no assertion criteria provided	VCV000009160	11	128709696	11	128839801	9160	24199	rs104894254	NC_000011.10:128839800:C:T
NM_153766.3(KCNJ1):c.535G>A (p.Ala179Thr)	KCNJ1	A198T, A179T, A196T	Bartter syndrome, type 2, antenatal	Pathogenic(Last reviewed: Jan 1, 1997)	no assertion criteria provided	VCV000009159	11	128709604	11	128839709	9159	24198	rs104894253	NC_000011.10:128839708:C:T
NM_153766.3(KCNJ1):c.1013T>C (p.Met338Thr)	KCNJ1	M338T, M355T, M357T	Bartter syndrome, type 2, antenatal|not specified|not provided	Benign/Likely benign(Last reviewed: Feb 18, 2022)	criteria provided, multiple submitters, no conflicts	VCV000009158	11	128709126	11	128839231	9158	24197	rs59172778	NC_000011.10:128839230:A:G
NM_153766.3(KCNJ1):c.584C>T (p.Ala195Val)	KCNJ1	A195V, A212V, A214V	Bartter syndrome, type 2, antenatal	Pathogenic(Last reviewed: Jun 1, 1998)	no assertion criteria provided	VCV000009157	11	128709555	11	128839660	9157	24196	rs104894246	NC_000011.10:128839659:G:A
NM_153766.3(KCNJ1):c.600C>G (p.Ser200Arg)	KCNJ1	S200R, S219R, S217R	Bartter syndrome, type 2, antenatal	Pathogenic(Last reviewed: Jun 1, 1998)	no assertion criteria provided	VCV000009155	11	128709539	11	128839644	9155	24194	rs104894245	NC_000011.10:128839643:G:C
NM_002241.5(KCNJ10):c.115G>A (p.Val39Met)	KCNJ10	V39M	not provided	Likely pathogenic(Last reviewed: Jan 2, 2020)	criteria provided, single submitter	VCV001335935	1	160012208	1	160042418	1335935	1326948		NC_000001.11:160042417:C:T
NM_002241.5(KCNJ10):c.331C>G (p.Gln111Glu)	KCNJ10	Q111E	not provided	Uncertain significance(Last reviewed: Jun 28, 2021)	criteria provided, single submitter	VCV001331196	1	160011992	1	160042202	1331196	1321871		NC_000001.11:160042201:G:C
NM_002241.5(KCNJ10):c.400C>A (p.Arg134Ser)	KCNJ10	R134S	EAST syndrome	Likely pathogenic(Last reviewed: Oct 5, 2021)	criteria provided, single submitter	VCV001299582	1	160011923	1	160042133	1299582	1289636		NC_000001.11:160042132:G:T
NM_002241.5(KCNJ10):c.937C>T (p.Pro313Ser)	KCNJ10	P313S	not provided	Uncertain significance(Last reviewed: May 20, 2019)	criteria provided, single submitter	VCV001163175	1	160011386	1	160041596	1163175	1151859		NC_000001.11:160041595:G:A
NM_002241.5(KCNJ10):c.1031A>G (p.Asp344Gly)	KCNJ10	D344G	not provided	Uncertain significance(Last reviewed: Jun 9, 2019)	criteria provided, single submitter	VCV001163174	1	160011292	1	160041502	1163174	1151858		NC_000001.11:160041501:T:C
NM_002241.5(KCNJ10):c.536T>A (p.Ile179Asn)	KCNJ10	I179N	EAST syndrome	Uncertain significance(Last reviewed: Jul 28, 2020)	criteria provided, single submitter	VCV001098613	1	160011787	1	160041997	1098613	1087297		NC_000001.11:160041996:A:T
NM_002241.5(KCNJ10):c.35C>A (p.Thr12Asn)	KCNJ10	T12N	EAST syndrome	Uncertain significance(Last reviewed: Apr 8, 2020)	criteria provided, single submitter	VCV001061987	1	160012288	1	160042498	1061987	1039529		NC_000001.11:160042497:G:T
NM_002241.5(KCNJ10):c.79C>T (p.Arg27Trp)	KCNJ10	R27W	EAST syndrome	Uncertain significance(Last reviewed: Mar 12, 2020)	criteria provided, single submitter	VCV001058689	1	160012244	1	160042454	1058689	1039528		NC_000001.11:160042453:G:A
NM_002241.5(KCNJ10):c.1006G>C (p.Val336Leu)	KCNJ10	V336L	not provided|EAST syndrome	Uncertain significance(Last reviewed: Apr 14, 2021)	criteria provided, multiple submitters, no conflicts	VCV001057513	1	160011317	1	160041527	1057513	1039524		NC_000001.11:160041526:C:G
NM_002241.5(KCNJ10):c.1053C>G (p.Asp351Glu)	KCNJ10	D351E	EAST syndrome	Uncertain significance(Last reviewed: Mar 9, 2020)	criteria provided, single submitter	VCV001055860	1	160011270	1	160041480	1055860	1039521		NC_000001.11:160041479:G:C
NM_002241.5(KCNJ10):c.1027C>T (p.Arg343Cys)	KCNJ10	R343C	not provided|EAST syndrome	Uncertain significance(Last reviewed: Apr 1, 2020)	criteria provided, multiple submitters, no conflicts	VCV001055010	1	160011296	1	160041506	1055010	1039523		NC_000001.11:160041505:G:A
NM_002241.5(KCNJ10):c.725C>T (p.Thr242Ile)	KCNJ10	T242I	EAST syndrome	Uncertain significance(Last reviewed: Sep 1, 2020)	criteria provided, single submitter	VCV001054232	1	160011598	1	160041808	1054232	1039525		NC_000001.11:160041807:G:A
NM_002241.5(KCNJ10):c.694A>G (p.Asn232Asp)	KCNJ10	N232D	EAST syndrome	Uncertain significance(Last reviewed: Feb 6, 2020)	criteria provided, single submitter	VCV001053593	1	160011629	1	160041839	1053593	1039526		NC_000001.11:160041838:T:C
NM_002241.5(KCNJ10):c.107G>A (p.Arg36His)	KCNJ10	R36H	EAST syndrome	Uncertain significance(Last reviewed: Oct 16, 2020)	criteria provided, single submitter	VCV001053296	1	160012216	1	160042426	1053296	1039527		NC_000001.11:160042425:C:T
NM_002241.5(KCNJ10):c.1028G>A (p.Arg343His)	KCNJ10	R343H	EAST syndrome	Uncertain significance(Last reviewed: Jul 26, 2020)	criteria provided, single submitter	VCV001052382	1	160011295	1	160041505	1052382	1039522		NC_000001.11:160041504:C:T
NM_002241.5(KCNJ10):c.424C>G (p.Leu142Val)	KCNJ10	L142V	EAST syndrome	Uncertain significance(Last reviewed: Apr 23, 2020)	criteria provided, single submitter	VCV001045513	1	160011899	1	160042109	1045513	1022694	rs1348882970	NC_000001.11:160042108:G:C
NM_002241.5(KCNJ10):c.278A>T (p.His93Leu)	KCNJ10	H93L	EAST syndrome	Uncertain significance(Last reviewed: May 4, 2020)	criteria provided, single submitter	VCV001044267	1	160012045	1	160042255	1044267	1022695	rs1377862008	NC_000001.11:160042254:T:A
NM_002241.5(KCNJ10):c.541T>C (p.Phe181Leu)	KCNJ10	F181L	EAST syndrome	Uncertain significance(Last reviewed: Oct 6, 2020)	criteria provided, single submitter	VCV001041315	1	160011782	1	160041992	1041315	1022693	rs374746230	NC_000001.11:160041991:A:G
NM_002241.5(KCNJ10):c.622C>T (p.Leu208Phe)	KCNJ10	L208F	EAST syndrome	Uncertain significance(Last reviewed: May 20, 2020)	criteria provided, single submitter	VCV001039986	1	160011701	1	160041911	1039986	1022692	rs1389684432	NC_000001.11:160041910:G:A
NM_002241.5(KCNJ10):c.1106G>A (p.Gly369Asp)	KCNJ10	G369D	EAST syndrome	Uncertain significance(Last reviewed: Oct 26, 2020)	criteria provided, single submitter	VCV001039795	1	160011217	1	160041427	1039795	1022690	rs754783764	NC_000001.11:160041426:C:T
NM_002241.5(KCNJ10):c.83G>A (p.Arg28Gln)	KCNJ10	R28Q	EAST syndrome	Uncertain significance(Last reviewed: Jul 2, 2020)	criteria provided, single submitter	VCV001038534	1	160012240	1	160042450	1038534	1022696	rs766560083	NC_000001.11:160042449:C:T
NM_002241.5(KCNJ10):c.20T>C (p.Val7Ala)	KCNJ10	V7A	EAST syndrome	Uncertain significance(Last reviewed: May 26, 2020)	criteria provided, single submitter	VCV001035994	1	160012303	1	160042513	1035994	1022697	rs1440235554	NC_000001.11:160042512:A:G
NM_002241.5(KCNJ10):c.769C>G (p.His257Asp)	KCNJ10	H257D	EAST syndrome	Uncertain significance(Last reviewed: Aug 22, 2020)	criteria provided, single submitter	VCV001035800	1	160011554	1	160041764	1035800	1022691	rs1648612559	NC_000001.11:160041763:G:C
NM_002241.5(KCNJ10):c.278A>G (p.His93Arg)	KCNJ10	H93R	EAST syndrome	Uncertain significance(Last reviewed: Jul 31, 2020)	criteria provided, single submitter	VCV001028010	1	160012045	1	160042255	1028010	1015574	rs1377862008	NC_000001.11:160042254:T:C
NM_002241.5(KCNJ10):c.1A>G (p.Met1Val)	KCNJ10	M1V	EAST syndrome	Uncertain significance(Last reviewed: Feb 26, 2020)	criteria provided, single submitter	VCV001025196	1	160012322	1	160042532	1025196	1002222	rs1260852127	NC_000001.11:160042531:T:C
NM_002241.5(KCNJ10):c.208C>T (p.Leu70Phe)	KCNJ10	L70F	EAST syndrome	Uncertain significance(Last reviewed: Apr 10, 2020)	criteria provided, single submitter	VCV001018116	1	160012115	1	160042325	1018116	1002220	rs1648628910	NC_000001.11:160042324:G:A
NM_002241.5(KCNJ10):c.5C>G (p.Thr2Arg)	KCNJ10	T2R	EAST syndrome	Uncertain significance(Last reviewed: Mar 5, 2020)	criteria provided, single submitter	VCV001017047	1	160012318	1	160042528	1017047	1002221	rs1378425325	NC_000001.11:160042527:G:C
NM_002241.5(KCNJ10):c.1046A>G (p.Tyr349Cys)	KCNJ10	Y349C	EAST syndrome	Uncertain significance(Last reviewed: Feb 25, 2020)	criteria provided, single submitter	VCV001015917	1	160011277	1	160041487	1015917	1002219	rs1414952042	NC_000001.11:160041486:T:C
NM_002241.5(KCNJ10):c.479T>A (p.Phe160Tyr)	KCNJ10	F160Y	EAST syndrome	Uncertain significance(Last reviewed: Jan 20, 2020)	criteria provided, single submitter	VCV001010803	1	160011844	1	160042054	1010803	986980	rs1648619981	NC_000001.11:160042053:A:T
NM_002241.5(KCNJ10):c.1033A>G (p.Ser345Gly)	KCNJ10	S345G	EAST syndrome	Uncertain significance(Last reviewed: May 4, 2020)	criteria provided, single submitter	VCV001007194	1	160011290	1	160041500	1007194	986979	rs752571720	NC_000001.11:160041499:T:C
NM_002241.5(KCNJ10):c.80G>A (p.Arg27Gln)	KCNJ10	R27Q	EAST syndrome	Uncertain significance(Last reviewed: Jan 29, 2020)	criteria provided, single submitter	VCV001007143	1	160012243	1	160042453	1007143	986982	rs776766074	NC_000001.11:160042452:C:T
NM_002241.5(KCNJ10):c.334G>T (p.Val112Leu)	KCNJ10	V112L	EAST syndrome	Uncertain significance(Last reviewed: Mar 23, 2020)	criteria provided, single submitter	VCV001000192	1	160011989	1	160042199	1000192	986981	rs1029810218	NC_000001.11:160042198:C:A
NM_002241.5(KCNJ10):c.506T>C (p.Ile169Thr)	KCNJ10	I169T	EAST syndrome	Uncertain significance(Last reviewed: Nov 19, 2018)	criteria provided, single submitter	VCV000976160	1	160011817	1	160042027	976160	964133	rs777546233	NC_000001.11:160042026:A:G
NM_002241.5(KCNJ10):c.857C>G (p.Thr286Arg)	KCNJ10	T286R	EAST syndrome	Uncertain significance(Last reviewed: Sep 1, 2020)	criteria provided, single submitter	VCV000968911	1	160011466	1	160041676	968911	952115	rs757920393	NC_000001.11:160041675:G:C
NM_002241.5(KCNJ10):c.142C>T (p.Arg48Cys)	KCNJ10	R48C	EAST syndrome|not provided	Uncertain significance(Last reviewed: Jun 13, 2020)	criteria provided, multiple submitters, no conflicts	VCV000964546	1	160012181	1	160042391	964546	941522	rs754056344	NC_000001.11:160042390:G:A
NM_002241.5(KCNJ10):c.451C>A (p.Leu151Met)	KCNJ10	L151M	EAST syndrome	Uncertain significance(Last reviewed: Oct 20, 2019)	criteria provided, single submitter	VCV000964092	1	160011872	1	160042082	964092	941520	rs1409713469	NC_000001.11:160042081:G:T
NM_002241.5(KCNJ10):c.659C>G (p.Thr220Ser)	KCNJ10	T220S	EAST syndrome	Uncertain significance(Last reviewed: Oct 30, 2019)	criteria provided, single submitter	VCV000963003	1	160011664	1	160041874	963003	941519	rs1446546759	NC_000001.11:160041873:G:C
NM_002241.5(KCNJ10):c.217G>A (p.Ala73Thr)	KCNJ10	A73T	EAST syndrome	Uncertain significance(Last reviewed: Jul 16, 2019)	criteria provided, single submitter	VCV000961034	1	160012106	1	160042316	961034	941521	rs779548724	NC_000001.11:160042315:C:T
NM_002241.5(KCNJ10):c.1049G>C (p.Gly350Ala)	KCNJ10	G350A	EAST syndrome	Uncertain significance(Last reviewed: Oct 12, 2019)	criteria provided, single submitter	VCV000954341	1	160011274	1	160041484	954341	941518	rs748553015	NC_000001.11:160041483:C:G
NM_002241.5(KCNJ10):c.304C>A (p.Pro102Thr)	KCNJ10	P102T	EAST syndrome	Uncertain significance(Last reviewed: Oct 29, 2019)	criteria provided, single submitter	VCV000951016	1	160012019	1	160042229	951016	921694	rs1424578559	NC_000001.11:160042228:G:T
NM_002241.5(KCNJ10):c.292G>A (p.Glu98Lys)	KCNJ10	E98K	EAST syndrome	Uncertain significance(Last reviewed: Oct 29, 2019)	criteria provided, single submitter	VCV000951015	1	160012031	1	160042241	951015	921695	rs200054482	NC_000001.11:160042240:C:T
NM_002241.5(KCNJ10):c.335T>G (p.Val112Gly)	KCNJ10	V112G	EAST syndrome	Uncertain significance(Last reviewed: Jun 17, 2019)	criteria provided, single submitter	VCV000948757	1	160011988	1	160042198	948757	921693	rs1216507118	NC_000001.11:160042197:A:C
NM_002241.5(KCNJ10):c.436C>T (p.Leu146Phe)	KCNJ10	L146F	EAST syndrome	Uncertain significance(Last reviewed: Jun 19, 2019)	criteria provided, single submitter	VCV000948281	1	160011887	1	160042097	948281	921691	rs1348153476	NC_000001.11:160042096:G:A
NM_002241.5(KCNJ10):c.430A>G (p.Ile144Val)	KCNJ10	I144V	EAST syndrome	Uncertain significance(Last reviewed: Jan 24, 2020)	criteria provided, single submitter	VCV000944501	1	160011893	1	160042103	944501	921692	rs997287643	NC_000001.11:160042102:T:C
NM_002241.5(KCNJ10):c.241C>T (p.Leu81Phe)	KCNJ10	L81F	EAST syndrome	Uncertain significance(Last reviewed: Oct 9, 2019)	criteria provided, single submitter	VCV000934084	1	160012082	1	160042292	934084	930100	rs939420346	NC_000001.11:160042291:G:A
NM_002241.5(KCNJ10):c.301C>T (p.Pro101Ser)	KCNJ10	P101S	EAST syndrome	Uncertain significance(Last reviewed: Nov 25, 2019)	criteria provided, single submitter	VCV000863438	1	160012022	1	160042232	863438	822887	rs375361490	NC_000001.11:160042231:G:A
NM_002241.5(KCNJ10):c.302C>T (p.Pro101Leu)	KCNJ10	P101L	EAST syndrome	Uncertain significance(Last reviewed: Nov 27, 2019)	criteria provided, single submitter	VCV000862459	1	160012021	1	160042231	862459	822886	rs1648625636	NC_000001.11:160042230:G:A
NM_002241.5(KCNJ10):c.719T>C (p.Val240Ala)	KCNJ10	V240A	EAST syndrome	Uncertain significance(Last reviewed: Dec 17, 2019)	criteria provided, single submitter	VCV000858442	1	160011604	1	160041814	858442	822884	rs765938615	NC_000001.11:160041813:A:G
NM_002241.5(KCNJ10):c.878C>T (p.Thr293Ile)	KCNJ10	T293I	EAST syndrome	Uncertain significance(Last reviewed: Dec 11, 2019)	criteria provided, single submitter	VCV000849201	1	160011445	1	160041655	849201	822881	rs1390924910	NC_000001.11:160041654:G:A
NM_002241.5(KCNJ10):c.1012T>G (p.Ser338Ala)	KCNJ10	S338A	EAST syndrome	Uncertain significance(Last reviewed: Jan 1, 2020)	criteria provided, single submitter	VCV000845861	1	160011311	1	160041521	845861	822880	rs1034857467	NC_000001.11:160041520:A:C
NM_002241.5(KCNJ10):c.817G>T (p.Gly273Cys)	KCNJ10	G273C	EAST syndrome	Uncertain significance(Last reviewed: Jun 4, 2019)	criteria provided, single submitter	VCV000840662	1	160011506	1	160041716	840662	822883	rs1648611336	NC_000001.11:160041715:C:A
NM_002241.5(KCNJ10):c.845T>A (p.Ile282Asn)	KCNJ10	I282N	EAST syndrome	Uncertain significance(Last reviewed: Jul 22, 2020)	criteria provided, single submitter	VCV000835600	1	160011478	1	160041688	835600	822882	rs985870982	NC_000001.11:160041687:A:T
NM_002241.5(KCNJ10):c.967T>C (p.Tyr323His)	KCNJ10	Y323H	Peripheral neuropathy	Uncertain significance	criteria provided, single submitter	VCV000816536	1	160011356	1	160041566	816536	804736	rs1571265188	NC_000001.11:160041565:A:G
NM_002241.5(KCNJ10):c.755C>G (p.Pro252Arg)	KCNJ10	P252R	Abnormality of the nervous system	Likely pathogenic(Last reviewed: Jul 10, 2021)	criteria provided, single submitter	VCV000694648	1	160011568	1	160041778	694648	682748	rs1571265375	NC_000001.11:160041777:G:C
NM_002241.5(KCNJ10):c.601G>A (p.Ala201Thr)	KCNJ10	A201T	SeSAME-like syndrome	Pathogenic	no assertion criteria provided	VCV000692217	1	160011722	1	160041932	692217	679959	rs1571265496	NC_000001.11:160041931:C:T
NM_002241.5(KCNJ10):c.626T>C (p.Ile209Thr)	KCNJ10	I209T	SeSAME-like syndrome	Pathogenic	no assertion criteria provided	VCV000692216	1	160011697	1	160041907	692216	679958	rs1404425302	NC_000001.11:160041906:A:G
NM_002241.5(KCNJ10):c.143G>C (p.Arg48Pro)	KCNJ10	R48P	EAST syndrome	Uncertain significance(Last reviewed: Sep 17, 2019)	criteria provided, multiple submitters, no conflicts	VCV000665846	1	160012180	1	160042390	665846	626988	rs201907875	NC_000001.11:160042389:C:G
NM_002241.5(KCNJ10):c.783G>C (p.Glu261Asp)	KCNJ10	E261D	EAST syndrome	Uncertain significance(Last reviewed: Jul 30, 2020)	criteria provided, single submitter	VCV000659085	1	160011540	1	160041750	659085	626985	rs372204106	NC_000001.11:160041749:C:G
NM_002241.5(KCNJ10):c.512G>A (p.Arg171Gln)	KCNJ10	R171Q	EAST syndrome	Likely pathogenic(Last reviewed: Sep 9, 2020)	criteria provided, single submitter	VCV000656970	1	160011811	1	160042021	656970	626986	rs200320916	NC_000001.11:160042020:C:T
NM_002241.5(KCNJ10):c.106C>T (p.Arg36Cys)	KCNJ10	R36C	EAST syndrome	Uncertain significance(Last reviewed: Aug 3, 2018)	criteria provided, single submitter	VCV000647114	1	160012217	1	160042427	647114	626989	rs1256202581	NC_000001.11:160042426:G:A
NM_002241.5(KCNJ10):c.922G>C (p.Gly308Arg)	KCNJ10	G308R	not specified	Uncertain significance(Last reviewed: Jan 1, 2019)	criteria provided, single submitter	VCV000634471	1	160011401	1	160041611	634471	622305	rs1557967657	NC_000001.11:160041610:C:G
NM_002241.5(KCNJ10):c.385A>G (p.Ile129Val)	KCNJ10	I129V	EAST syndrome	Uncertain significance(Last reviewed: Sep 25, 2020)	criteria provided, single submitter	VCV000582279	1	160011938	1	160042148	582279	556711	rs751625111	NC_000001.11:160042147:T:C
NM_002241.5(KCNJ10):c.1054C>A (p.Pro352Thr)	KCNJ10	P352T	EAST syndrome	Uncertain significance(Last reviewed: Mar 12, 2018)	criteria provided, single submitter	VCV000578643	1	160011269	1	160041479	578643	556707	rs888967595	NC_000001.11:160041478:G:T
NM_002241.5(KCNJ10):c.1015C>A (p.Pro339Thr)	KCNJ10	P339T	EAST syndrome	Uncertain significance(Last reviewed: Apr 17, 2018)	criteria provided, single submitter	VCV000578367	1	160011308	1	160041518	578367	558176	rs1557967589	NC_000001.11:160041517:G:T
NM_002241.5(KCNJ10):c.1015C>T (p.Pro339Ser)	KCNJ10	P339S	EAST syndrome	Uncertain significance(Last reviewed: Mar 7, 2020)	criteria provided, single submitter	VCV000577075	1	160011308	1	160041518	577075	556709	rs1557967589	NC_000001.11:160041517:G:A
NM_002241.5(KCNJ10):c.511C>T (p.Arg171Trp)	KCNJ10	R171W	Pendred syndrome|Deafness, autosomal recessive 4, with enlarged vestibular aqueduct|EAST syndrome|EAST syndrome	Uncertain significance(Last reviewed: Nov 8, 2018)	criteria provided, multiple submitters, no conflicts	VCV000537736	1	160011812	1	160042022	537736	515169	rs769666695	NC_000001.11:160042021:G:A
NM_002241.5(KCNJ10):c.290T>A (p.Leu97Gln)	KCNJ10	L97Q	EAST syndrome	Uncertain significance(Last reviewed: Aug 24, 2017)	criteria provided, single submitter	VCV000537735	1	160012033	1	160042243	537735	515212	rs1401791648	NC_000001.11:160042242:A:T
NM_002241.5(KCNJ10):c.689G>A (p.Arg230Gln)	KCNJ10	R230Q	EAST syndrome	Uncertain significance(Last reviewed: Jan 3, 2018)	criteria provided, single submitter	VCV000470194	1	160011634	1	160041844	470194	447215	rs200807361	NC_000001.11:160041843:C:T
NM_002241.5(KCNJ10):c.133G>A (p.Ala45Thr)	KCNJ10	A45T	EAST syndrome|not provided	Uncertain significance(Last reviewed: Sep 15, 2021)	criteria provided, multiple submitters, no conflicts	VCV000470191	1	160012190	1	160042400	470191	447318	rs750246232	NC_000001.11:160042399:C:T
NM_002241.5(KCNJ10):c.1102G>C (p.Glu368Gln)	KCNJ10	E368Q	EAST syndrome	Uncertain significance(Last reviewed: Nov 29, 2019)	criteria provided, single submitter	VCV000470190	1	160011221	1	160041431	470190	447211	rs377330985	NC_000001.11:160041430:C:G
NM_002241.5(KCNJ10):c.1051G>A (p.Asp351Asn)	KCNJ10	D351N	not provided|Deafness, autosomal recessive 4, with enlarged vestibular aqueduct|Pendred syndrome|EAST syndrome|EAST syndrome|Intellectual disability	Conflicting interpretations of pathogenicity(Last reviewed: Mar 26, 2020)	criteria provided, conflicting interpretations	VCV000451985	1	160011272	1	160041482	451985	442645	rs373899425	NC_000001.11:160041481:C:T
NM_002241.5(KCNJ10):c.685A>T (p.Ile229Phe)	KCNJ10	I229F	not provided	Uncertain significance(Last reviewed: Aug 14, 2017)	criteria provided, single submitter	VCV000451168	1	160011638	1	160041848	451168	442646	rs767156961	NC_000001.11:160041847:T:A
NM_002241.5(KCNJ10):c.300C>A (p.Asp100Glu)	KCNJ10	D100E	not specified|not provided|EAST syndrome	Conflicting interpretations of pathogenicity(Last reviewed: Nov 24, 2020)	criteria provided, conflicting interpretations	VCV000435553	1	160012023	1	160042233	435553	427657	rs139069413	NC_000001.11:160042232:G:T
NM_002241.5(KCNJ10):c.10G>A (p.Val4Ile)	KCNJ10	V4I	not specified	Uncertain significance(Last reviewed: Aug 22, 2016)	criteria provided, single submitter	VCV000435552	1	160012313	1	160042523	435552	427659	rs144428351	NC_000001.11:160042522:C:T
NM_002241.5(KCNJ10):c.274G>T (p.Ala92Ser)	KCNJ10	A92S	EAST syndrome|not specified	Uncertain significance(Last reviewed: Apr 20, 2020)	criteria provided, multiple submitters, no conflicts	VCV000435551	1	160012049	1	160042259	435551	427658	rs1314505994	NC_000001.11:160042258:C:A
NM_002241.5(KCNJ10):c.539G>A (p.Arg180His)	KCNJ10	R180H	not provided	Uncertain significance(Last reviewed: May 22, 2017)	criteria provided, single submitter	VCV000430278	1	160011784	1	160041994	430278	421182	rs1131691880	NC_000001.11:160041993:C:T
NM_002241.5(KCNJ10):c.112A>G (p.Asn38Asp)	KCNJ10	N38D	not provided	Uncertain significance(Last reviewed: Apr 6, 2017)	criteria provided, single submitter	VCV000426727	1	160012211	1	160042421	426727	414738	rs1085307764	NC_000001.11:160042420:T:C
NM_002241.5(KCNJ10):c.1006G>A (p.Val336Met)	KCNJ10	V336M	not provided	Uncertain significance(Last reviewed: Apr 6, 2017)	criteria provided, single submitter	VCV000426726	1	160011317	1	160041527	426726	414737	rs1085307763	NC_000001.11:160041526:C:T
NM_002241.5(KCNJ10):c.1048G>A (p.Gly350Arg)	KCNJ10	G350R	EAST syndrome	Uncertain significance(Last reviewed: Sep 5, 2016)	criteria provided, single submitter	VCV000411159	1	160011275	1	160041485	411159	390845	rs770453248	NC_000001.11:160041484:C:T
NM_002241.5(KCNJ10):c.305C>T (p.Pro102Leu)	KCNJ10	P102L	not provided|EAST syndrome	Conflicting interpretations of pathogenicity(Last reviewed: Jul 21, 2020)	criteria provided, conflicting interpretations	VCV000411158	1	160012018	1	160042228	411158	390846	rs372156619	NC_000001.11:160042227:G:A
NM_002241.5(KCNJ10):c.1124G>A (p.Arg375His)	KCNJ10	R375H	History of neurodevelopmental disorder|EAST syndrome	Uncertain significance(Last reviewed: Dec 24, 2019)	criteria provided, multiple submitters, no conflicts	VCV000411157	1	160011199	1	160041409	411157	390841	rs189596680	NC_000001.11:160041408:C:T
NM_002241.5(KCNJ10):c.401G>A (p.Arg134His)	KCNJ10	R134H	not provided|EAST syndrome	Uncertain significance(Last reviewed: Aug 16, 2018)	criteria provided, multiple submitters, no conflicts	VCV000391946	1	160011922	1	160042132	391946	364480	rs368857205	NC_000001.11:160042131:C:T
NM_002241.5(KCNJ10):c.296T>C (p.Leu99Pro)	KCNJ10	L99P	not provided|Deafness, autosomal recessive 4, with enlarged vestibular aqueduct|EAST syndrome	Uncertain significance(Last reviewed: Jan 12, 2018)	criteria provided, multiple submitters, no conflicts	VCV000293120	1	160012027	1	160042237	293120	277687	rs540341763	NC_000001.11:160042236:A:G
NM_002241.5(KCNJ10):c.1123C>T (p.Arg375Cys)	KCNJ10	R375C	not provided|Deafness, autosomal recessive 4, with enlarged vestibular aqueduct|EAST syndrome	Uncertain significance(Last reviewed: Jul 17, 2020)	criteria provided, multiple submitters, no conflicts	VCV000293118	1	160011200	1	160041410	293118	277782	rs751338154	NC_000001.11:160041409:G:A
NM_002241.5(KCNJ10):c.994C>G (p.Gln332Glu)	KCNJ10	Q332E	not provided	Uncertain significance(Last reviewed: Aug 3, 2016)	criteria provided, single submitter	VCV000289394	1	160011329	1	160041539	289394	273631	rs886044169	NC_000001.11:160041538:G:C
NM_002241.5(KCNJ10):c.148C>T (p.Leu50Phe)	KCNJ10	L50F	EAST syndrome|not provided|Deafness, autosomal recessive 4, with enlarged vestibular aqueduct	Uncertain significance(Last reviewed: Sep 16, 2021)	criteria provided, multiple submitters, no conflicts	VCV000282077	1	160012175	1	160042385	282077	266314	rs773510302	NC_000001.11:160042384:G:A
NM_002241.5(KCNJ10):c.62T>C (p.Met21Thr)	KCNJ10	M21T	EAST syndrome	Uncertain significance(Last reviewed: Mar 30, 2016)	criteria provided, single submitter	VCV000239111	1	160012261	1	160042471	239111	238153	rs878854483	NC_000001.11:160042470:A:G
NM_002241.5(KCNJ10):c.136G>A (p.Asp46Asn)	KCNJ10	D46N	History of neurodevelopmental disorder|not specified|not provided|EAST syndrome|Deafness, autosomal recessive 4, with enlarged vestibular aqueduct|Intellectual disability|Seizures	Conflicting interpretations of pathogenicity(Last reviewed: Nov 18, 2020)	criteria provided, conflicting interpretations	VCV000239110	1	160012187	1	160042397	239110	238152	rs141553756	NC_000001.11:160042396:C:T
NM_002241.5(KCNJ10):c.998T>C (p.Val333Ala)	KCNJ10	V333A	not provided|EAST syndrome	Uncertain significance(Last reviewed: Aug 7, 2018)	criteria provided, multiple submitters, no conflicts	VCV000205830	1	160011325	1	160041535	205830	201051	rs750091894	NC_000001.11:160041534:A:G
NM_002241.5(KCNJ10):c.652C>T (p.Leu218Phe)	KCNJ10	L218F	Deafness, autosomal recessive 4, with enlarged vestibular aqueduct|EAST syndrome|Pendred syndrome|EAST syndrome|Deafness, autosomal recessive 4, with enlarged vestibular aqueduct|not specified	Uncertain significance(Last reviewed: Sep 24, 2020)	criteria provided, multiple submitters, no conflicts	VCV000205829	1	160011671	1	160041881	205829	201055	rs558502886	NC_000001.11:160041880:G:A
NM_002241.5(KCNJ10):c.427G>A (p.Ala143Thr)	KCNJ10	A143T	not provided	Uncertain significance(Last reviewed: Feb 4, 2019)	criteria provided, multiple submitters, no conflicts	VCV000205828	1	160011896	1	160042106	205828	201056	rs796052607	NC_000001.11:160042105:C:T
NM_002241.5(KCNJ10):c.301C>A (p.Pro101Thr)	KCNJ10	P101T	Deafness, autosomal recessive 4, with enlarged vestibular aqueduct|EAST syndrome|EAST syndrome|Deafness, autosomal recessive 4, with enlarged vestibular aqueduct|not specified	Uncertain significance(Last reviewed: Jun 8, 2020)	criteria provided, multiple submitters, no conflicts	VCV000205827	1	160012022	1	160042232	205827	201057	rs375361490	NC_000001.11:160042231:G:T
NM_002241.5(KCNJ10):c.179T>C (p.Ile60Thr)	KCNJ10	I60T	not provided|EAST syndrome|History of neurodevelopmental disorder	Uncertain significance(Last reviewed: Dec 11, 2017)	criteria provided, multiple submitters, no conflicts	VCV000205826	1	160012144	1	160042354	205826	201061	rs759993423	NC_000001.11:160042353:A:G
NM_002241.5(KCNJ10):c.1061A>G (p.Lys354Arg)	KCNJ10	K354R	not provided|EAST syndrome|Deafness, autosomal recessive 4, with enlarged vestibular aqueduct|Nonsyndromic Hearing Loss, Recessive	Uncertain significance(Last reviewed: Oct 9, 2020)	criteria provided, multiple submitters, no conflicts	VCV000205824	1	160011262	1	160041472	205824	201048	rs142596580	NC_000001.11:160041471:T:C
NM_002241.5(KCNJ10):c.1043G>A (p.Arg348His)	KCNJ10	R348H	not specified|not provided|Intellectual disability|Deafness, autosomal recessive 4, with enlarged vestibular aqueduct|History of neurodevelopmental disorder|Deafness, autosomal recessive 4, with enlarged vestibular aqueduct|EAST syndrome|Pendred syndrome|EAST syndrome	Uncertain significance(Last reviewed: Oct 3, 2020)	criteria provided, multiple submitters, no conflicts	VCV000205823	1	160011280	1	160041490	205823	201049	rs146396982	NC_000001.11:160041489:C:T
NM_002241.5(KCNJ10):c.1021G>C (p.Gly341Arg)	KCNJ10	G341R	not provided	Uncertain significance(Last reviewed: Feb 11, 2014)	criteria provided, single submitter	VCV000205822	1	160011302	1	160041512	205822	201050	rs796052605	NC_000001.11:160041511:C:G
NM_002241.5(KCNJ10):c.688C>T (p.Arg230Trp)	KCNJ10	R230W	EAST syndrome|not provided	Conflicting interpretations of pathogenicity(Last reviewed: Sep 15, 2020)	criteria provided, conflicting interpretations	VCV000205821	1	160011635	1	160041845	205821	201053	rs149615470	NC_000001.11:160041844:G:A
NM_002241.5(KCNJ10):c.685A>G (p.Ile229Val)	KCNJ10	I229V	not provided|EAST syndrome	Uncertain significance(Last reviewed: Nov 27, 2019)	criteria provided, multiple submitters, no conflicts	VCV000205820	1	160011638	1	160041848	205820	201054	rs767156961	NC_000001.11:160041847:T:C
NM_002241.5(KCNJ10):c.250G>A (p.Val84Met)	KCNJ10	V84M	EAST syndrome|not provided	Uncertain significance(Last reviewed: Oct 24, 2020)	criteria provided, multiple submitters, no conflicts	VCV000205819	1	160012073	1	160042283	205819	201058	rs140646329	NC_000001.11:160042282:C:T
NM_002241.5(KCNJ10):c.221C>T (p.Thr74Ile)	KCNJ10	T74I	not provided|EAST syndrome	Conflicting interpretations of pathogenicity(Last reviewed: Nov 3, 2017)	criteria provided, conflicting interpretations	VCV000205818	1	160012102	1	160042312	205818	201060	rs796052604	NC_000001.11:160042311:G:A
NM_002241.5(KCNJ10):c.52C>T (p.Arg18Trp)	KCNJ10	R18W	EAST syndrome|not provided|Deafness, autosomal recessive 4, with enlarged vestibular aqueduct|History of neurodevelopmental disorder	Uncertain significance(Last reviewed: Mar 29, 2021)	criteria provided, multiple submitters, no conflicts	VCV000205817	1	160012271	1	160042481	205817	201062	rs138457635	NC_000001.11:160042480:G:A
NM_002241.5(KCNJ10):c.735C>G (p.Asp245Glu)	KCNJ10	D245E	EAST syndrome|Deafness, autosomal recessive 4, with enlarged vestibular aqueduct|not specified|not provided	Conflicting interpretations of pathogenicity(Last reviewed: Dec 8, 2020)	criteria provided, conflicting interpretations	VCV000205815	1	160011588	1	160041798	205815	201052	rs146426296	NC_000001.11:160041797:G:C
NM_002241.5(KCNJ10):c.530A>G (p.Glu177Gly)	KCNJ10	E177G	not provided|Deafness, autosomal recessive 4, with enlarged vestibular aqueduct|EAST syndrome|Deafness, autosomal recessive 4, with enlarged vestibular aqueduct|EAST syndrome	Conflicting interpretations of pathogenicity(Last reviewed: Mar 8, 2022)	criteria provided, conflicting interpretations	VCV000195165	1	160011793	1	160042003	195165	192326	rs145947380	NC_000001.11:160042002:T:C
NM_002241.5(KCNJ10):c.394G>A (p.Gly132Ser)	KCNJ10	G132S	not provided	Uncertain significance(Last reviewed: Feb 14, 2015)	criteria provided, single submitter	VCV000195164	1	160011929	1	160042139	195164	192325	rs794727266	NC_000001.11:160042138:C:T
NM_002241.5(KCNJ10):c.124G>A (p.Glu42Lys)	KCNJ10	E42K	not provided	Uncertain significance(Last reviewed: Apr 18, 2019)	criteria provided, multiple submitters, no conflicts	VCV000195163	1	160012199	1	160042409	195163	192324	rs794727265	NC_000001.11:160042408:C:T
NM_002241.5(KCNJ10):c.812G>A (p.Arg271His)	KCNJ10	R271H	History of neurodevelopmental disorder|not specified|not provided|EAST syndrome|Deafness, autosomal recessive 4, with enlarged vestibular aqueduct	Conflicting interpretations of pathogenicity(Last reviewed: Dec 3, 2020)	criteria provided, conflicting interpretations	VCV000129318	1	160011511	1	160041721	129318	134764	rs3795339	NC_000001.11:160041720:C:T
NM_002241.5(KCNJ10):c.811C>T (p.Arg271Cys)	KCNJ10	R271C	not specified|EAST syndrome|Deafness, autosomal recessive 4, with enlarged vestibular aqueduct|History of neurodevelopmental disorder	Benign/Likely benign(Last reviewed: Dec 3, 2020)	criteria provided, multiple submitters, no conflicts	VCV000129317	1	160011512	1	160041722	129317	134763	rs1130183	NC_000001.11:160041721:G:A
NM_002241.5(KCNJ10):c.53G>A (p.Arg18Gln)	KCNJ10	R18Q	History of neurodevelopmental disorder|not specified|not provided|EAST syndrome|Seizures|Autistic disorder|Intellectual disability	Conflicting interpretations of pathogenicity(Last reviewed: Dec 4, 2020)	criteria provided, conflicting interpretations	VCV000129316	1	160012270	1	160042480	129316	134762	rs115466046	NC_000001.11:160042479:C:T
NM_002241.5(KCNJ10):c.524G>A (p.Arg175Gln)	KCNJ10	R175Q	not provided|EAST syndrome	Conflicting interpretations of pathogenicity(Last reviewed: Aug 23, 2019)	criteria provided, conflicting interpretations	VCV000041471	1	160011799	1	160042009	41471	49907	rs397514673	NC_000001.11:160042008:C:T
NM_002241.5(KCNJ10):c.225T>G (p.Phe75Leu)	KCNJ10	F75L	EAST syndrome	Pathogenic(Last reviewed: Jan 1, 2011)	no assertion criteria provided	VCV000030252	1	160012098	1	160042308	30252	39208	rs757159382	NC_000001.11:160042307:A:C
NM_002241.5(KCNJ10):c.193C>T (p.Arg65Cys)	KCNJ10	R65C	EAST syndrome	Likely pathogenic(Last reviewed: Oct 28, 2020)	criteria provided, single submitter	VCV000030251	1	160012130	1	160042340	30251	39207	rs387906834	NC_000001.11:160042339:G:A
NM_002241.5(KCNJ10):c.1042C>T (p.Arg348Cys)	KCNJ10	R348C	KCNJ10-Related Disorders|not specified|not provided|EAST syndrome|Deafness, autosomal recessive 4, with enlarged vestibular aqueduct	Conflicting interpretations of pathogenicity(Last reviewed: Nov 9, 2021)	criteria provided, conflicting interpretations	VCV000007470	1	160011281	1	160041491	7470	22509	rs137853074	NC_000001.11:160041490:G:A
NM_002241.5(KCNJ10):c.581C>A (p.Pro194His)	KCNJ10	P194H	Deafness, autosomal recessive 4, with enlarged vestibular aqueduct	Pathogenic(Last reviewed: May 1, 2009)	no assertion criteria provided	VCV000007469	1	160011742	1	160041952	7469	22508	rs137853073	NC_000001.11:160041951:G:T
NM_002241.5(KCNJ10):c.229G>C (p.Gly77Arg)	KCNJ10	G77R	EAST syndrome	Pathogenic(Last reviewed: Nov 12, 2010)	no assertion criteria provided	VCV000007468	1	160012094	1	160042304	7468	22507	rs137853072	NC_000001.11:160042303:C:G
NM_002241.5(KCNJ10):c.889C>T (p.Arg297Cys)	KCNJ10	R297C	EAST syndrome|not provided	Pathogenic/Likely pathogenic(Last reviewed: Jul 31, 2020)	criteria provided, multiple submitters, no conflicts	VCV000007467	1	160011434	1	160041644	7467	22506	rs137853071	NC_000001.11:160041643:G:A
NM_002241.5(KCNJ10):c.500C>T (p.Ala167Val)	KCNJ10	A167V	Pendred syndrome|EAST syndrome|Deafness, autosomal recessive 4, with enlarged vestibular aqueduct|EAST syndrome	Pathogenic(Last reviewed: Jun 30, 2021)	criteria provided, single submitter	VCV000007466	1	160011823	1	160042033	7466	22505	rs137853070	NC_000001.11:160042032:G:A
NM_002241.5(KCNJ10):c.491C>T (p.Thr164Ile)	KCNJ10	T164I	EAST syndrome	Pathogenic(Last reviewed: Nov 12, 2010)	no assertion criteria provided	VCV000007465	1	160011832	1	160042042	7465	22504	rs137853069	NC_000001.11:160042041:G:A
NM_002241.5(KCNJ10):c.418T>C (p.Cys140Arg)	KCNJ10	C140R	EAST syndrome	Pathogenic(Last reviewed: Nov 12, 2010)	no assertion criteria provided	VCV000007464	1	160011905	1	160042115	7464	22503	rs137853068	NC_000001.11:160042114:A:G
NM_002241.5(KCNJ10):c.194G>C (p.Arg65Pro)	KCNJ10	R65P	Renal tubular dysfunction|Bilateral sensorineural hearing impairment|Cerebellar ataxia|Spastic diplegia|Microcephaly|EAST syndrome	Pathogenic(Last reviewed: Nov 12, 2010)	no assertion criteria provided	VCV000007462	1	160012129	1	160042339	7462	22501	rs137853066	NC_000001.11:160042338:C:G
NM_000525.4(KCNJ11):c.616C>T (p.Arg206Cys)	KCNJ11	R119C, R206C	not provided	Likely pathogenic(Last reviewed: Nov 17, 2020)	criteria provided, single submitter	VCV001338615	11	17409023	11	17387476	1338615	1329622		NC_000011.10:17387475:G:A
NM_000525.4(KCNJ11):c.130G>A (p.Val44Met)	KCNJ11	V44M	not specified	Uncertain significance(Last reviewed: Nov 11, 2019)	criteria provided, single submitter	VCV001338560	11	17409509	11	17387962	1338560	1329568		NC_000011.10:17387961:C:T
NM_000525.4(KCNJ11):c.515C>T (p.Ala172Val)	KCNJ11	A172V, A85V	not provided	Likely pathogenic(Last reviewed: Nov 11, 2019)	criteria provided, single submitter	VCV001338559	11	17409124	11	17387577	1338559	1329567		NC_000011.10:17387576:G:A
NM_000525.4(KCNJ11):c.556C>G (p.His186Asp)	KCNJ11	H186D, H99D	not provided	Likely pathogenic(Last reviewed: Feb 3, 2020)	criteria provided, single submitter	VCV001338466	11	17409083	11	17387536	1338466	1329474		NC_000011.10:17387535:G:C
NM_000525.4(KCNJ11):c.992C>G (p.Ser331Cys)	KCNJ11	S244C, S331C	not specified	Uncertain significance(Last reviewed: Nov 29, 2018)	criteria provided, single submitter	VCV001338465	11	17408647	11	17387100	1338465	1329473		NC_000011.10:17387099:G:C
NM_000525.4(KCNJ11):c.248G>C (p.Trp83Ser)	KCNJ11	W83S	not specified	Uncertain significance(Last reviewed: Jan 25, 2018)	criteria provided, single submitter	VCV001338364	11	17409391	11	17387844	1338364	1329372		NC_000011.10:17387843:C:G
NM_000525.4(KCNJ11):c.944T>C (p.Phe315Ser)	KCNJ11	F228S, F315S	not provided	Likely pathogenic(Last reviewed: Dec 6, 2017)	criteria provided, single submitter	VCV001338354	11	17408695	11	17387148	1338354	1329362		NC_000011.10:17387147:A:G
NM_000525.4(KCNJ11):c.1106G>T (p.Arg369Leu)	KCNJ11	R282L, R369L	not specified	Uncertain significance(Last reviewed: Jul 12, 2017)	criteria provided, single submitter	VCV001338240	11	17408533	11	17386986	1338240	1329249		NC_000011.10:17386985:C:A
NM_000525.4(KCNJ11):c.805G>A (p.Asp269Asn)	KCNJ11	D182N, D269N	not specified	Uncertain significance(Last reviewed: Sep 10, 2020)	criteria provided, single submitter	VCV001337726	11	17408834	11	17387287	1337726	1328735		NC_000011.10:17387286:C:T
NM_000525.4(KCNJ11):c.353C>T (p.Ser118Leu)	KCNJ11	S118L, S31L	not specified	Uncertain significance(Last reviewed: Feb 19, 2018)	criteria provided, single submitter	VCV001336017	11	17409286	11	17387739	1336017	1327030		NC_000011.10:17387738:G:A
NM_000525.4(KCNJ11):c.945T>G (p.Phe315Leu)	KCNJ11	F228L, F315L	not provided	Uncertain significance(Last reviewed: Oct 27, 2020)	criteria provided, single submitter	VCV001303818	11	17408694	11	17387147	1303818	1294093		NC_000011.10:17387146:A:C
NM_000525.4(KCNJ11):c.412G>T (p.Val138Leu)	KCNJ11	V138L, V51L	not provided	Uncertain significance(Last reviewed: Oct 11, 2019)	criteria provided, single submitter	VCV001303676	11	17409227	11	17387680	1303676	1293953		NC_000011.10:17387679:C:A
NM_000525.4(KCNJ11):c.86G>A (p.Arg29His)	KCNJ11	R29H	not provided	Uncertain significance(Last reviewed: Feb 11, 2021)	criteria provided, single submitter	VCV001303355	11	17409553	11	17388006	1303355	1293633		NC_000011.10:17388005:C:T
NM_000525.4(KCNJ11):c.629T>C (p.Ile210Thr)	KCNJ11	I123T, I210T	not specified	Uncertain significance(Last reviewed: Aug 27, 2020)	criteria provided, single submitter	VCV001301543	11	17409010	11	17387463	1301543	1291828		NC_000011.10:17387462:A:G
NM_000525.4(KCNJ11):c.101G>A (p.Arg34His)	KCNJ11	R34H	Permanent neonatal diabetes mellitus|not provided	Likely pathogenic(Last reviewed: Sep 24, 2019)	criteria provided, single submitter	VCV001219242	11	17409538	11	17387991	1219242	1209220		NC_000011.10:17387990:C:T
NM_000525.4(KCNJ11):c.617G>A (p.Arg206His)	KCNJ11	R119H, R206H	Hyperinsulinemic hypoglycemia, familial, 2	Likely pathogenic(Last reviewed: Dec 6, 2019)	criteria provided, single submitter	VCV001162197	11	17409022	11	17387475	1162197	1151093		NC_000011.10:17387474:C:T
NM_000525.4(KCNJ11):c.83C>T (p.Ala28Val)	KCNJ11	A28V	Hyperinsulinemic hypoglycemia, familial, 2	Uncertain significance(Last reviewed: Jun 13, 2019)	criteria provided, single submitter	VCV001065467	11	17409556	11	17388009	1065467	1053772		NC_000011.10:17388008:G:A
NM_000525.4(KCNJ11):c.941G>A (p.Arg314His)	KCNJ11	R227H, R314H	Permanent neonatal diabetes mellitus 1	Uncertain significance(Last reviewed: Oct 9, 2018)	criteria provided, single submitter	VCV001034248	11	17408698	11	17387151	1034248	1020842	rs145935651	NC_000011.10:17387150:C:T
NM_000525.4(KCNJ11):c.539C>A (p.Thr180Asn)	KCNJ11	T93N, T180N	Transient neonatal diabetes mellitus 3	Uncertain significance(Last reviewed: May 9, 2018)	criteria provided, single submitter	VCV001034247	11	17409100	11	17387553	1034247	1020843	rs1953584002	NC_000011.10:17387552:G:T
NM_000525.4(KCNJ11):c.803A>T (p.Tyr268Phe)	KCNJ11	Y268F, Y181F	Transient neonatal diabetes mellitus 3	Uncertain significance(Last reviewed: Jun 21, 2019)	criteria provided, single submitter	VCV001028816	11	17408836	11	17387289	1028816	1017416	rs1953576929	NC_000011.10:17387288:T:A
NM_000525.4(KCNJ11):c.472A>T (p.Met158Leu)	KCNJ11	M158L, M71L	Transient neonatal diabetes mellitus 3	Uncertain significance(Last reviewed: Sep 27, 2019)	criteria provided, single submitter	VCV001028815	11	17409167	11	17387620	1028815	1017417	rs1953585385	NC_000011.10:17387619:T:A
NM_000525.4(KCNJ11):c.346T>C (p.Ser116Pro)	KCNJ11	S116P, S29P	not provided	Uncertain significance(Last reviewed: Dec 16, 2020)	criteria provided, single submitter	VCV000994911	11	17409293	11	17387746	994911	982755	rs1953587696	NC_000011.10:17387745:A:G
NM_000525.4(KCNJ11):c.568G>A (p.Ala190Thr)	KCNJ11	A103T, A190T	not provided|Permanent neonatal diabetes mellitus	Conflicting interpretations of pathogenicity(Last reviewed: Nov 13, 2020)	criteria provided, conflicting interpretations	VCV000992029	11	17409071	11	17387524	992029	978884	rs77131926	NC_000011.10:17387523:C:T
NM_000525.4(KCNJ11):c.905C>T (p.Thr302Ile)	KCNJ11	T215I, T302I	Permanent neonatal diabetes mellitus	Uncertain significance(Last reviewed: Apr 13, 2020)	no assertion criteria provided	VCV000992026	11	17408734	11	17387187	992026	978881	rs761575495	NC_000011.10:17387186:G:A
NM_000525.4(KCNJ11):c.1005C>A (p.Asn335Lys)	KCNJ11	N248K, N335K	Permanent neonatal diabetes mellitus	Uncertain significance(Last reviewed: Oct 1, 2020)	no assertion criteria provided	VCV000992025	11	17408634	11	17387087	992025	978880	rs1564864998	NC_000011.10:17387086:G:T
NM_000525.4(KCNJ11):c.1105C>T (p.Arg369Cys)	KCNJ11	R282C, R369C	Permanent neonatal diabetes mellitus	Uncertain significance(Last reviewed: Oct 20, 2020)	no assertion criteria provided	VCV000992024	11	17408534	11	17386987	992024	978879	rs371275937	NC_000011.10:17386986:G:A
NM_000525.4(KCNJ11):c.1117G>A (p.Val373Met)	KCNJ11	V286M, V373M	Permanent neonatal diabetes mellitus|not provided	Likely benign(Last reviewed: Oct 3, 2020)	criteria provided, single submitter	VCV000992023	11	17408522	11	17386975	992023	978878	rs770375846	NC_000011.10:17386974:C:T
NM_000525.4(KCNJ11):c.1126G>T (p.Ala376Ser)	KCNJ11	A289S, A376S	Permanent neonatal diabetes mellitus	Uncertain significance(Last reviewed: Apr 13, 2020)	no assertion criteria provided	VCV000992022	11	17408513	11	17386966	992022	978877	rs1953567712	NC_000011.10:17386965:C:A
NM_000525.4(KCNJ11):c.10C>T (p.Arg4Cys)	KCNJ11	R4C	Permanent neonatal diabetes mellitus	Uncertain significance(Last reviewed: Oct 29, 2020)	no assertion criteria provided	VCV000989948	11	17409629	11	17388082	989948	978890	rs543286136	NC_000011.10:17388081:G:A
NM_000525.4(KCNJ11):c.309C>A (p.Ser103Arg)	KCNJ11	S103R, S16R	Permanent neonatal diabetes mellitus	Uncertain significance(Last reviewed: Aug 28, 2020)	no assertion criteria provided	VCV000989944	11	17409330	11	17387783	989944	978886	rs376773562	NC_000011.10:17387782:G:T
NM_000525.4(KCNJ11):c.1044G>C (p.Gln348His)	KCNJ11	Q261H, Q348H	Monogenic diabetes	Uncertain significance(Last reviewed: Feb 22, 2019)	criteria provided, single submitter	VCV000917414	11	17408595	11	17387048	917414	905789	rs745379486	NC_000011.10:17387047:C:G
NM_000525.4(KCNJ11):c.91C>T (p.Arg31Trp)	KCNJ11	R31W	Maturity-onset diabetes of the young, type 13|Hyperinsulinemic hypoglycemia, familial, 2|Transient neonatal diabetes mellitus 3	Uncertain significance(Last reviewed: Apr 27, 2017)	criteria provided, single submitter	VCV000878730	11	17409548	11	17388001	878730	867611	rs757621300	NC_000011.10:17388000:G:A
NM_000525.4(KCNJ11):c.451G>A (p.Val151Met)	KCNJ11	V151M, V64M	Maturity-onset diabetes of the young, type 13|Transient neonatal diabetes mellitus 3|Hyperinsulinemic hypoglycemia, familial, 2	Conflicting interpretations of pathogenicity(Last reviewed: Jan 13, 2018)	criteria provided, conflicting interpretations	VCV000877702	11	17409188	11	17387641	877702	867609	rs529884745	NC_000011.10:17387640:C:T
NM_000525.4(KCNJ11):c.902G>C (p.Arg301Pro)	KCNJ11	R301P, R214P	not provided|Monogenic diabetes	Conflicting interpretations of pathogenicity(Last reviewed: Dec 20, 2019)	criteria provided, conflicting interpretations	VCV000847800	11	17408737	11	17387190	847800	838133	rs74339576	NC_000011.10:17387189:C:G
NM_000525.4(KCNJ11):c.874G>A (p.Glu292Lys)	KCNJ11	E205K, E292K	Permanent neonatal diabetes mellitus|not provided	Uncertain significance(Last reviewed: Apr 24, 2019)	criteria provided, single submitter	VCV000804977	11	17408765	11	17387218	804977	793379	rs1174593640	NC_000011.10:17387217:C:T
NM_000525.4(KCNJ11):c.406C>A (p.Arg136Ser)	KCNJ11	R49S, R136S	not provided	Uncertain significance(Last reviewed: Jul 3, 2019)	criteria provided, single submitter	VCV000804976	11	17409233	11	17387686	804976	793380	rs766891274	NC_000011.10:17387685:G:T
NM_000525.4(KCNJ11):c.28G>C (p.Glu10Gln)	KCNJ11	E10Q	not provided	Likely benign(Last reviewed: May 28, 2019)	criteria provided, single submitter	VCV000801368	11	17409611	11	17388064	801368	789751	rs587783667	NC_000011.10:17388063:C:G
NM_000525.4(KCNJ11):c.365T>C (p.Leu122Pro)	KCNJ11	L122P, L35P	Hyperinsulinemic hypoglycemia, familial, 2	Likely pathogenic(Last reviewed: Aug 21, 2019)	criteria provided, single submitter	VCV000694392	11	17409274	11	17387727	694392	682320	rs1591695840	NC_000011.10:17387726:A:G
NM_000525.4(KCNJ11):c.901C>T (p.Arg301Cys)	KCNJ11	R214C, R301C	not provided	Likely pathogenic(Last reviewed: Nov 5, 2018)	criteria provided, single submitter	VCV000642470	11	17408738	11	17387191	642470	639829	rs377091338	NC_000011.10:17387190:G:A
NM_000525.4(KCNJ11):c.697C>T (p.Leu233Phe)	KCNJ11	L233F, L146F	Maturity-onset diabetes of the young, type 13	Likely pathogenic(Last reviewed: Feb 9, 2018)	criteria provided, single submitter	VCV000617651	11	17408942	11	17387395	617651	609051	rs1564865302	NC_000011.10:17387394:G:A
NM_000525.4(KCNJ11):c.989A>T (p.Tyr330Phe)	KCNJ11	Y330F, Y243F	not provided	Uncertain significance(Last reviewed: Mar 14, 2018)	criteria provided, single submitter	VCV000586106	11	17408650	11	17387103	586106	577172	rs193929356	NC_000011.10:17387102:T:A
NM_000525.4(KCNJ11):c.541C>T (p.Leu181Phe)	KCNJ11	L181F, L94F	not provided	Uncertain significance(Last reviewed: May 9, 2018)	criteria provided, single submitter	VCV000586104	11	17409098	11	17387551	586104	577174	rs1564865434	NC_000011.10:17387550:G:A
NM_000525.4(KCNJ11):c.245G>A (p.Ser82Asn)	KCNJ11	S82N	not provided	Uncertain significance(Last reviewed: Sep 20, 2017)	criteria provided, single submitter	VCV000586103	11	17409394	11	17387847	586103	577175	rs1564865688	NC_000011.10:17387846:C:T
NM_000525.4(KCNJ11):c.407G>A (p.Arg136His)	KCNJ11	R136H, R49H	Permanent neonatal diabetes mellitus|Transient neonatal diabetes mellitus 3|Hyperinsulinemic hypoglycemia, familial, 2	Uncertain significance(Last reviewed: Apr 27, 2018)	criteria provided, single submitter	VCV000558072	11	17409232	11	17387685	558072	545820	rs1479483693	NC_000011.10:17387684:C:T
NM_000525.4(KCNJ11):c.797C>T (p.Pro266Leu)	KCNJ11	P266L, P179L	Permanent neonatal diabetes mellitus|Transient neonatal diabetes mellitus 3|Hyperinsulinemic hypoglycemia, familial, 2	Uncertain significance(Last reviewed: Apr 6, 2018)	criteria provided, single submitter	VCV000557803	11	17408842	11	17387295	557803	546122	rs1554901679	NC_000011.10:17387294:G:A
NM_000525.4(KCNJ11):c.100C>T (p.Arg34Cys)	KCNJ11	R34C	Permanent neonatal diabetes mellitus|Transient neonatal diabetes mellitus 3|Hyperinsulinemic hypoglycemia, familial, 2	Likely pathogenic(Last reviewed: Mar 24, 2018)	criteria provided, single submitter	VCV000557416	11	17409539	11	17387992	557416	545841	rs954727530	NC_000011.10:17387991:G:A
NM_000525.4(KCNJ11):c.662G>A (p.Arg221His)	KCNJ11	R221H, R134H	Permanent neonatal diabetes mellitus|Transient neonatal diabetes mellitus 3|Hyperinsulinemic hypoglycemia, familial, 2	Uncertain significance(Last reviewed: Feb 22, 2018)	criteria provided, single submitter	VCV000556784	11	17408977	11	17387430	556784	546187	rs768909861	NC_000011.10:17387429:C:T
NM_000525.4(KCNJ11):c.617G>T (p.Arg206Leu)	KCNJ11	R206L, R119L	Hyperinsulinemic hypoglycemia, familial, 2|Transient neonatal diabetes mellitus 3|Permanent neonatal diabetes mellitus	Uncertain significance(Last reviewed: Jan 16, 2018)	criteria provided, single submitter	VCV000556175	11	17409022	11	17387475	556175	546456	rs1554901747	NC_000011.10:17387474:C:A
NM_000525.4(KCNJ11):c.527G>A (p.Arg176His)	KCNJ11	R176H, R89H	Hyperinsulinemic hypoglycemia, familial, 2|Transient neonatal diabetes mellitus 3|Permanent neonatal diabetes mellitus	Uncertain significance(Last reviewed: Jan 4, 2018)	criteria provided, single submitter	VCV000555940	11	17409112	11	17387565	555940	546194	rs1266231295	NC_000011.10:17387564:C:T
NM_000525.4(KCNJ11):c.1112G>A (p.Arg371His)	KCNJ11	R371H, R284H	Hyperinsulinemic hypoglycemia, familial, 2|Permanent neonatal diabetes mellitus|Transient neonatal diabetes mellitus 3	Uncertain significance(Last reviewed: Sep 27, 2017)	criteria provided, single submitter	VCV000554088	11	17408527	11	17386980	554088	546115	rs1233061680	NC_000011.10:17386979:C:T
NM_000525.4(KCNJ11):c.264G>T (p.Met88Ile)	KCNJ11	M88I, M1I	Hyperinsulinemic hypoglycemia, familial, 2|Permanent neonatal diabetes mellitus|Transient neonatal diabetes mellitus 3	Uncertain significance(Last reviewed: Sep 13, 2017)	criteria provided, single submitter	VCV000553835	11	17409375	11	17387828	553835	545826	rs1554901866	NC_000011.10:17387827:C:A
NM_000525.4(KCNJ11):c.1040G>A (p.Arg347His)	KCNJ11	R347H, R260H	Hyperinsulinemic hypoglycemia, familial, 2|Permanent neonatal diabetes mellitus|Maturity-onset diabetes of the young, type 13|not provided|Monogenic diabetes|Hyperinsulinemic hypoglycemia, familial, 2|Permanent neonatal diabetes mellitus|Transient neonatal diabetes mellitus 3	Uncertain significance(Last reviewed: Mar 2, 2018)	criteria provided, multiple submitters, no conflicts	VCV000553036	11	17408599	11	17387052	553036	546118	rs771797701	NC_000011.10:17387051:C:T
NM_000525.4(KCNJ11):c.853G>A (p.Val285Ile)	KCNJ11	V285I, V198I	Hyperinsulinemic hypoglycemia, familial, 2|Permanent neonatal diabetes mellitus|Transient neonatal diabetes mellitus 3	Uncertain significance(Last reviewed: Jun 27, 2017)	criteria provided, single submitter	VCV000552596	11	17408786	11	17387239	552596	546452	rs149667199	NC_000011.10:17387238:C:T
NM_000525.4(KCNJ11):c.575G>A (p.Arg192His)	KCNJ11	R192H, R105H	Transient neonatal diabetes mellitus 3|Hyperinsulinemic hypoglycemia, familial, 2|Permanent neonatal diabetes mellitus	Uncertain significance(Last reviewed: Jun 13, 2017)	criteria provided, single submitter	VCV000552480	11	17409064	11	17387517	552480	546188	rs750778014	NC_000011.10:17387516:C:T
NM_000525.4(KCNJ11):c.302C>A (p.Ala101Asp)	KCNJ11	A101D, A14D	Transient neonatal diabetes mellitus 3|Hyperinsulinemic hypoglycemia, familial, 2|Permanent neonatal diabetes mellitus	Uncertain significance(Last reviewed: Jun 7, 2017)	criteria provided, single submitter	VCV000552375	11	17409337	11	17387790	552375	546460	rs1014454531	NC_000011.10:17387789:G:T
NM_000525.4(KCNJ11):c.292G>A (p.Gly98Ser)	KCNJ11	G98S, G11S	Transient neonatal diabetes mellitus 3|Hyperinsulinemic hypoglycemia, familial, 2|Permanent neonatal diabetes mellitus	Uncertain significance(Last reviewed: May 17, 2017)	criteria provided, single submitter	VCV000551926	11	17409347	11	17387800	551926	546201	rs1554901851	NC_000011.10:17387799:C:T
NM_000525.4(KCNJ11):c.1094G>A (p.Arg365His)	KCNJ11	R365H, R278H	Transient neonatal diabetes mellitus 3|Hyperinsulinemic hypoglycemia, familial, 2|Permanent neonatal diabetes mellitus	Uncertain significance(Last reviewed: Aug 4, 2017)	criteria provided, single submitter	VCV000551506	11	17408545	11	17386998	551506	546116	rs750689750	NC_000011.10:17386997:C:T
NM_000525.4(KCNJ11):c.119G>A (p.Gly40Asp)	KCNJ11	G40D	Transient neonatal diabetes mellitus 3|Hyperinsulinemic hypoglycemia, familial, 2|Permanent neonatal diabetes mellitus	Uncertain significance(Last reviewed: Apr 6, 2017)	criteria provided, single submitter	VCV000551373	11	17409520	11	17387973	551373	545832	rs1001873841	NC_000011.10:17387972:C:T
NM_000525.4(KCNJ11):c.560C>T (p.Ala187Val)	KCNJ11	A187V, A100V	Transient neonatal diabetes mellitus 3|Hyperinsulinemic hypoglycemia, familial, 2|Permanent neonatal diabetes mellitus	Likely pathogenic(Last reviewed: Mar 21, 2017)	criteria provided, single submitter	VCV000551187	11	17409079	11	17387532	551187	546193	rs1371185696	NC_000011.10:17387531:G:A
NM_000525.4(KCNJ11):c.970G>A (p.Gly324Arg)	KCNJ11	G324R, G237R	Transient neonatal diabetes mellitus 3|Hyperinsulinemic hypoglycemia, familial, 2|Permanent neonatal diabetes mellitus	Uncertain significance(Last reviewed: Mar 8, 2017)	criteria provided, single submitter	VCV000551025	11	17408669	11	17387122	551025	546173	rs1193170151	NC_000011.10:17387121:C:T
NM_000525.4(KCNJ11):c.1016T>G (p.Val339Gly)	KCNJ11	V339G, V252G	Transient neonatal diabetes mellitus 3|Type 2 diabetes mellitus|Maturity-onset diabetes of the young, type 13|Permanent neonatal diabetes mellitus|Hyperinsulinemic hypoglycemia, familial, 2|Transient neonatal diabetes mellitus 3|Permanent neonatal diabetes mellitus|Hyperinsulinemic hypoglycemia, familial, 2	Uncertain significance(Last reviewed: Oct 31, 2018)	criteria provided, multiple submitters, no conflicts	VCV000550169	11	17408623	11	17387076	550169	546120	rs138125678	NC_000011.10:17387075:A:C
NM_000525.4(KCNJ11):c.794G>T (p.Ser265Ile)	KCNJ11	S265I, S178I	Monogenic diabetes	Uncertain significance(Last reviewed: Nov 18, 2016)	criteria provided, single submitter	VCV000549538	11	17408845	11	17387298	549538	540021	rs1437510576	NC_000011.10:17387297:C:A
NM_000525.4(KCNJ11):c.980C>A (p.Ser327Tyr)	KCNJ11	S327Y, S240Y	not provided|not specified	Uncertain significance(Last reviewed: Jul 11, 2017)	criteria provided, multiple submitters, no conflicts	VCV000447637	11	17408659	11	17387112	447637	441398	rs1554901583	NC_000011.10:17387111:G:T
NM_000525.4(KCNJ11):c.174C>G (p.Asp58Glu)	KCNJ11	D58E	not provided	Uncertain significance(Last reviewed: Aug 31, 2017)	criteria provided, single submitter	VCV000447635	11	17409465	11	17387918	447635	441400	rs1237212288	NC_000011.10:17387917:G:C
NM_000525.4(KCNJ11):c.160C>T (p.Arg54Cys)	KCNJ11	R54C	not provided	Likely pathogenic(Last reviewed: Dec 22, 2017)	criteria provided, single submitter	VCV000447634	11	17409479	11	17387932	447634	441401	rs375848765	NC_000011.10:17387931:G:A
NM_000525.4(KCNJ11):c.47G>A (p.Arg16His)	KCNJ11	R16H	Type 2 diabetes mellitus	not provided	no assertion provided	VCV000441000	11	17409592	11	17388045	441000	434638	rs770609243	NC_000011.10:17388044:C:T
NM_000525.4(KCNJ11):c.179T>C (p.Phe60Ser)	KCNJ11	F60S	not specified	Uncertain significance(Last reviewed: Mar 29, 2016)	criteria provided, single submitter	VCV000435561	11	17409460	11	17387913	435561	429191	rs387906783	NC_000011.10:17387912:A:G
NM_000525.4(KCNJ11):c.973C>A (p.Arg325Ser)	KCNJ11	R325S, R238S	not specified|not provided|Permanent neonatal diabetes mellitus|Transient neonatal diabetes mellitus 3|Hyperinsulinemic hypoglycemia, familial, 2|Type 2 diabetes mellitus|Maturity-onset diabetes of the young, type 13	Uncertain significance(Last reviewed: Oct 31, 2018)	criteria provided, multiple submitters, no conflicts	VCV000435560	11	17408666	11	17387119	435560	429186	rs550315112	NC_000011.10:17387118:G:T
NM_000525.4(KCNJ11):c.185C>T (p.Thr62Met)	KCNJ11	T62M	not specified	Likely pathogenic(Last reviewed: Oct 6, 2017)	criteria provided, single submitter	VCV000435559	11	17409454	11	17387907	435559	429190	rs1057518775	NC_000011.10:17387906:G:A
NM_000525.4(KCNJ11):c.406C>T (p.Arg136Cys)	KCNJ11	R136C, R49C	Hyperinsulinemic hypoglycemia, familial, 2	Pathogenic(Last reviewed: Mar 1, 2016)	criteria provided, single submitter	VCV000435558	11	17409233	11	17387686	435558	429189	rs766891274	NC_000011.10:17387685:G:A
NM_000525.4(KCNJ11):c.490C>T (p.Leu164Phe)	KCNJ11	L164F, L77F	not specified	Uncertain significance(Last reviewed: Sep 23, 2016)	criteria provided, single submitter	VCV000435557	11	17409149	11	17387602	435557	429188	rs1554901796	NC_000011.10:17387601:G:A
NM_000525.4(KCNJ11):c.868G>A (p.Val290Met)	KCNJ11	V290M, V203M	Hyperinsulinemic hypoglycemia, familial, 2	Likely pathogenic(Last reviewed: Feb 13, 2015)	criteria provided, single submitter	VCV000435556	11	17408771	11	17387224	435556	429187	rs750414160	NC_000011.10:17387223:C:T
NM_000525.4(KCNJ11):c.185C>G (p.Thr62Arg)	KCNJ11	T62R	Dermatitis, atopic|Hypertrichosis|Hyperinsulinemia|Hypoglycemia	Likely pathogenic(Last reviewed: Jul 18, 2016)	no assertion criteria provided	VCV000373928	11	17409454	11	17387907	373928	360928	rs1057518775	NC_000011.10:17387906:G:C
NM_000525.4(KCNJ11):c.525C>A (p.His175Gln)	KCNJ11	H175Q, H88Q	Maturity-onset diabetes of the young, type 13|Transient neonatal diabetes mellitus 3|Hyperinsulinemic hypoglycemia, familial, 2	Uncertain significance(Last reviewed: Jan 13, 2018)	criteria provided, single submitter	VCV000303737	11	17409114	11	17387567	303737	313383	rs865963367	NC_000011.10:17387566:G:T
NM_000525.4(KCNJ11):c.1034C>T (p.Thr345Met)	KCNJ11	T345M, T258M	Maturity-onset diabetes of the young, type 13|Hyperinsulinemic hypoglycemia, familial, 2|Transient neonatal diabetes mellitus 3	Conflicting interpretations of pathogenicity(Last reviewed: Jan 13, 2018)	criteria provided, conflicting interpretations	VCV000303734	11	17408605	11	17387058	303734	319489	rs114215135	NC_000011.10:17387057:G:A
NM_000525.4(KCNJ11):c.1093C>T (p.Arg365Cys)	KCNJ11	R365C, R278C	not provided|Hyperinsulinemic hypoglycemia, familial, 2|Transient neonatal diabetes mellitus 3|Permanent neonatal diabetes mellitus	Uncertain significance(Last reviewed: Jan 11, 2017)	criteria provided, multiple submitters, no conflicts	VCV000287827	11	17408546	11	17386999	287827	272064	rs758749160	NC_000011.10:17386998:G:A
NM_000525.4(KCNJ11):c.661C>G (p.Arg221Gly)	KCNJ11	R221G, R134G	not provided	Uncertain significance(Last reviewed: Jan 28, 2016)	criteria provided, single submitter	VCV000285949	11	17408978	11	17387431	285949	270186	rs781450902	NC_000011.10:17387430:G:C
NM_000525.4(KCNJ11):c.80G>A (p.Arg27His)	KCNJ11	R27H	not provided|Hyperinsulinemic hypoglycemia, familial, 2|Permanent neonatal diabetes mellitus|Transient neonatal diabetes mellitus 3|Permanent neonatal diabetes mellitus	Uncertain significance(Last reviewed: Sep 11, 2021)	criteria provided, multiple submitters, no conflicts	VCV000285043	11	17409559	11	17388012	285043	269280	rs774714794	NC_000011.10:17388011:C:T
NM_000525.4(KCNJ11):c.719T>G (p.Met240Arg)	KCNJ11	M240R, M153R	not provided	Uncertain significance(Last reviewed: Nov 18, 2015)	criteria provided, single submitter	VCV000284188	11	17408920	11	17387373	284188	268425	rs886042818	NC_000011.10:17387372:A:C
NM_000525.4(KCNJ11):c.934G>A (p.Gly312Ser)	KCNJ11	G312S, G225S	not specified	Uncertain significance(Last reviewed: Feb 8, 2013)	criteria provided, single submitter	VCV000211231	11	17408705	11	17387158	211231	207831	rs72554079	NC_000011.10:17387157:C:T
NM_000525.4(KCNJ11):c.881C>T (p.Thr294Met)	KCNJ11	T294M, T207M	Transient neonatal diabetes mellitus 3|Type 2 diabetes mellitus|Hyperinsulinemic hypoglycemia, familial, 2|Permanent neonatal diabetes mellitus 2|Maturity-onset diabetes of the young, type 13|Hyperinsulinemic hypoglycemia, familial, 2|Transient neonatal diabetes mellitus 3|not provided	Pathogenic/Likely pathogenic(Last reviewed: Jun 30, 2021)	criteria provided, multiple submitters, no conflicts	VCV000211230	11	17408758	11	17387211	211230	207832	rs780957825	NC_000011.10:17387210:G:A
NM_000525.4(KCNJ11):c.866G>T (p.Gly289Val)	KCNJ11	G289V, G202V	Hyperinsulinemic hypoglycemia, familial, 2	Likely pathogenic(Last reviewed: Feb 9, 2015)	criteria provided, single submitter	VCV000211229	11	17408773	11	17387226	211229	207833	rs797045637	NC_000011.10:17387225:C:A
NM_000525.4(KCNJ11):c.866G>C (p.Gly289Ala)	KCNJ11	G289A, G202A	Hyperinsulinemic hypoglycemia, familial, 2	Likely pathogenic(Last reviewed: Jan 9, 2015)	criteria provided, single submitter	VCV000211228	11	17408773	11	17387226	211228	207834	rs797045637	NC_000011.10:17387225:C:G
NM_000525.4(KCNJ11):c.79C>T (p.Arg27Cys)	KCNJ11	R27C	not provided|Hyperinsulinemic hypoglycemia, familial, 2|Permanent neonatal diabetes mellitus|Transient neonatal diabetes mellitus 3|Permanent neonatal diabetes mellitus|Hyperinsulinemic hypoglycemia, familial, 2	Conflicting interpretations of pathogenicity(Last reviewed: Aug 12, 2019)	criteria provided, conflicting interpretations	VCV000211226	11	17409560	11	17388013	211226	207840	rs752507753	NC_000011.10:17388012:G:A
NM_000525.4(KCNJ11):c.526C>T (p.Arg176Cys)	KCNJ11	R176C, R89C	not specified	Uncertain significance(Last reviewed: Feb 8, 2013)	criteria provided, single submitter	VCV000211223	11	17409113	11	17387566	211223	207838	rs201264306	NC_000011.10:17387565:G:A
NM_000525.4(KCNJ11):c.1064T>C (p.Leu355Pro)	KCNJ11	L355P, L268P	Transient neonatal diabetes mellitus 3|Maturity-onset diabetes of the young, type 13|Hyperinsulinemic hypoglycemia, familial, 2|not specified	Uncertain significance(Last reviewed: Apr 27, 2017)	criteria provided, multiple submitters, no conflicts	VCV000211220	11	17408575	11	17387028	211220	207829	rs797045635	NC_000011.10:17387027:A:G
NM_000525.4(KCNJ11):c.821A>G (p.Asp274Gly)	KCNJ11	D274G, D187G	not provided	Uncertain significance(Last reviewed: Jul 1, 2014)	criteria provided, single submitter	VCV000193111	11	17408818	11	17387271	193111	190276	rs794726888	NC_000011.10:17387270:T:C
NM_000525.4(KCNJ11):c.1123A>G (p.Met375Val)	KCNJ11	M375V, M288V	not provided	Uncertain significance(Last reviewed: Mar 2, 2015)	criteria provided, single submitter	VCV000193109	11	17408516	11	17386969	193109	190274	rs777540229	NC_000011.10:17386968:T:C
NM_000525.4(KCNJ11):c.10C>A (p.Arg4Ser)	KCNJ11	R4S	not provided	Uncertain significance(Last reviewed: Dec 2, 2014)	criteria provided, single submitter	VCV000193108	11	17409629	11	17388082	193108	190273	rs543286136	NC_000011.10:17388081:G:T
NM_000525.4(KCNJ11):c.988T>C (p.Tyr330His)	KCNJ11	Y330H, Y243H	Diabetes mellitus	Pathogenic(Last reviewed: Feb 8, 2013)	criteria provided, single submitter	VCV000158688	11	17408651	11	17387104	158688	168864	rs587783675	NC_000011.10:17387103:A:G
NM_000525.4(KCNJ11):c.8C>G (p.Ser3Cys)	KCNJ11	S3C	Neonatal insulin-dependent diabetes mellitus	Pathogenic(Last reviewed: Feb 8, 2013)	criteria provided, single submitter	VCV000158687	11	17409631	11	17388084	158687	168879	rs587783674	NC_000011.10:17388083:G:C
NM_000525.4(KCNJ11):c.808C>G (p.Leu270Val)	KCNJ11	L270V, L183V	Permanent neonatal diabetes mellitus|Monogenic diabetes|not specified|Hyperinsulinemic hypoglycemia, familial, 2|Permanent neonatal diabetes mellitus 2|Maturity-onset diabetes of the young, type 13|not provided|Transient neonatal diabetes mellitus 3	Benign/Likely benign(Last reviewed: Jul 1, 2021)	criteria provided, multiple submitters, no conflicts	VCV000158685	11	17408831	11	17387284	158685	168866	rs1800467	NC_000011.10:17387283:G:C
NM_000525.4(KCNJ11):c.685G>A (p.Glu229Lys)	KCNJ11	E229K, E142K	Diabetes mellitus	Pathogenic(Last reviewed: Apr 28, 2014)	criteria provided, single submitter	VCV000158683	11	17408954	11	17387407	158683	168868	rs587783673	NC_000011.10:17387406:C:T
NM_000525.4(KCNJ11):c.679G>A (p.Glu227Lys)	KCNJ11	E227K, E140K	Maturity-onset diabetes of the young, type 13|not provided|Diabetes mellitus|Transient neonatal diabetes mellitus 3	Pathogenic(Last reviewed: Jun 21, 2020)	criteria provided, multiple submitters, no conflicts	VCV000158682	11	17408960	11	17387413	158682	168869	rs587783672	NC_000011.10:17387412:C:T
NM_000525.4(KCNJ11):c.584G>A (p.Arg195His)	KCNJ11	R195H, R108H	not specified|Permanent neonatal diabetes mellitus|Transient neonatal diabetes mellitus 3|Hyperinsulinemic hypoglycemia, familial, 2|not provided|Permanent neonatal diabetes mellitus	Conflicting interpretations of pathogenicity(Last reviewed: Nov 21, 2020)	criteria provided, conflicting interpretations	VCV000158681	11	17409055	11	17387508	158681	168870	rs5217	NC_000011.10:17387507:C:T
NM_000525.4(KCNJ11):c.536A>C (p.Glu179Ala)	KCNJ11	E179A, E92A	Neonatal insulin-dependent diabetes mellitus	Likely pathogenic(Last reviewed: Feb 8, 2013)	criteria provided, single submitter	VCV000158678	11	17409103	11	17387556	158678	168872	rs587783671	NC_000011.10:17387555:T:G
NM_000525.4(KCNJ11):c.521C>G (p.Ala174Gly)	KCNJ11	A174G, A87G	Neonatal insulin-dependent diabetes mellitus	Pathogenic(Last reviewed: Feb 8, 2013)	criteria provided, single submitter	VCV000158677	11	17409118	11	17387571	158677	168873	rs587783670	NC_000011.10:17387570:G:C
NM_000525.4(KCNJ11):c.498C>G (p.Cys166Trp)	KCNJ11	C166W, C79W	Diabetes mellitus	Likely pathogenic(Last reviewed: Oct 31, 2013)	criteria provided, single submitter	VCV000158676	11	17409141	11	17387594	158676	168874	rs587783669	NC_000011.10:17387593:G:C
NM_000525.4(KCNJ11):c.463G>A (p.Val155Met)	KCNJ11	V155M, V68M	Transient neonatal diabetes mellitus 3|Permanent neonatal diabetes mellitus|Hyperinsulinemic hypoglycemia, familial, 2|Permanent neonatal diabetes mellitus|Diabetes mellitus	Uncertain significance(Last reviewed: Jan 19, 2017)	criteria provided, multiple submitters, no conflicts	VCV000158675	11	17409176	11	17387629	158675	168875	rs587783668	NC_000011.10:17387628:C:T
NM_000525.4(KCNJ11):c.28G>A (p.Glu10Lys)	KCNJ11	E10K	not specified	Benign(Last reviewed: Feb 8, 2013)	criteria provided, single submitter	VCV000158674	11	17409611	11	17388064	158674	168878	rs587783667	NC_000011.10:17388063:C:T
NM_000525.4(KCNJ11):c.161G>A (p.Arg54His)	KCNJ11	R54H	Hyperinsulinemic hypoglycemia, familial, 2	Uncertain significance(Last reviewed: Feb 24, 2014)	criteria provided, single submitter	VCV000158673	11	17409478	11	17387931	158673	168876	rs587783666	NC_000011.10:17387930:C:T
NM_000525.4(KCNJ11):c.1009G>A (p.Val337Ile)	KCNJ11	V337I, V250I	not provided|Hyperinsulinemic hypoglycemia, familial, 2|Permanent neonatal diabetes mellitus 2|not specified|Maturity-onset diabetes of the young, type 13|Transient neonatal diabetes mellitus 3|Permanent neonatal diabetes mellitus	Benign/Likely benign(Last reviewed: Jul 1, 2021)	criteria provided, multiple submitters, no conflicts	VCV000158670	11	17408630	11	17387083	158670	168863	rs5215	NC_000011.10:17387082:C:T
NM_000352.6(ABCC8):c.4714G>A (p.Val1572Ile)	KCNJ11|ABCC8	V1572I, V1573I, V1594I, V1571I	Transient Neonatal Diabetes, Dominant|Hyperinsulinism, Dominant/Recessive|Hereditary hyperinsulinism|Permanent neonatal diabetes mellitus 3|not specified|Maturity onset diabetes mellitus in young|not provided|Transient neonatal diabetes mellitus 2|Hyperinsulinemic hypoglycemia, familial, 1|Leucine-induced hypoglycemia|Permanent neonatal diabetes mellitus	Benign/Likely benign(Last reviewed: Nov 30, 2021)	criteria provided, multiple submitters, no conflicts	VCV000157705	11	17414570	11	17393023	157705	167553	rs8192690	NC_000011.10:17393022:C:T
NM_000525.4(KCNJ11):c.5T>C (p.Leu2Pro)	KCNJ11	L2P	Neonatal diabetes mellitus	Likely pathogenic(Last reviewed: Aug 18, 2011)	criteria provided, single submitter	VCV000036433	11	17409634	11	17388087	36433	45096	rs193922565	NC_000011.10:17388086:A:G
NM_000525.4(KCNJ11):c.149G>A (p.Arg50Gln)	KCNJ11	R50Q	Neonatal diabetes mellitus|not provided	Pathogenic/Likely pathogenic(Last reviewed: Aug 30, 2016)	criteria provided, multiple submitters, no conflicts	VCV000036431	11	17409490	11	17387943	36431	45094	rs80356611	NC_000011.10:17387942:C:T
NM_000525.4(KCNJ11):c.1154C>G (p.Ser385Cys)	KCNJ11	S385C, S298C	Neonatal diabetes mellitus|Maturity-onset diabetes of the young, type 13|not specified|Hyperinsulinemic hypoglycemia, familial, 2|Monogenic diabetes|Transient neonatal diabetes mellitus 3|not provided	Conflicting interpretations of pathogenicity(Last reviewed: May 18, 2021)	criteria provided, conflicting interpretations	VCV000036430	11	17408485	11	17386938	36430	45093	rs41282930	NC_000011.10:17386937:G:C
NM_000525.4(KCNJ11):c.179T>A (p.Phe60Tyr)	KCNJ11	F60Y	Permanent neonatal diabetes mellitus 2	Pathogenic(Last reviewed: Mar 15, 2010)	no assertion criteria provided	VCV000030135	11	17409460	11	17387913	30135	39091	rs387906783	NC_000011.10:17387912:A:T
NM_000525.4(KCNJ11):c.997T>A (p.Phe333Ile)	KCNJ11	F333I, F246I	Permanent neonatal diabetes mellitus	Pathogenic(Last reviewed: Jul 5, 2011)	no assertion criteria provided	VCV000021205	11	17408642	11	17387095	21205	34057	rs193929357	NC_000011.10:17387094:A:T
NM_000525.4(KCNJ11):c.989A>G (p.Tyr330Cys)	KCNJ11	Y330C, Y243C	Neonatal insulin-dependent diabetes mellitus|Permanent neonatal diabetes mellitus	Pathogenic(Last reviewed: Feb 8, 2013)	criteria provided, single submitter	VCV000021204	11	17408650	11	17387103	21204	34056	rs193929356	NC_000011.10:17387102:T:C
NM_000525.4(KCNJ11):c.964G>A (p.Glu322Lys)	KCNJ11	E322K, E235K	Permanent neonatal diabetes mellitus|Diabetes mellitus	Pathogenic(Last reviewed: Feb 8, 2013)	criteria provided, single submitter	VCV000021203	11	17408675	11	17387128	21203	34055	rs193929355	NC_000011.10:17387127:C:T
NM_000525.4(KCNJ11):c.886A>G (p.Ile296Val)	KCNJ11	I296V, I209V	Permanent neonatal diabetes mellitus	Pathogenic(Last reviewed: Jul 5, 2011)	no assertion criteria provided	VCV000021202	11	17408753	11	17387206	21202	34054	rs193929353	NC_000011.10:17387205:T:C
NM_000525.4(KCNJ11):c.886A>C (p.Ile296Leu)	KCNJ11	I296L, I209L	Permanent neonatal diabetes mellitus	Pathogenic(Last reviewed: Jul 5, 2011)	no assertion criteria provided	VCV000021201	11	17408753	11	17387206	21201	34053	rs193929353	NC_000011.10:17387205:T:G
NM_000525.4(KCNJ11):c.755T>C (p.Val252Ala)	KCNJ11	V252A, V165A	Permanent neonatal diabetes mellitus	Pathogenic(Last reviewed: Jul 5, 2011)	no assertion criteria provided	VCV000021200	11	17408884	11	17387337	21200	34052	rs193929352	NC_000011.10:17387336:A:G
NM_000525.4(KCNJ11):c.602G>T (p.Arg201Leu)	KCNJ11	R201L, R114L	Permanent neonatal diabetes mellitus	Pathogenic(Last reviewed: Jul 5, 2011)	no assertion criteria provided	VCV000021199	11	17409037	11	17387490	21199	34051	rs80356624	NC_000011.10:17387489:C:A
NM_000525.4(KCNJ11):c.544A>G (p.Ile182Val)	KCNJ11	I182V, I95V	Permanent neonatal diabetes mellitus	Pathogenic(Last reviewed: Jul 5, 2011)	no assertion criteria provided	VCV000021198	11	17409095	11	17387548	21198	34050	rs193929348	NC_000011.10:17387547:T:C
NM_000525.4(KCNJ11):c.497G>A (p.Cys166Tyr)	KCNJ11	C166Y, C79Y	Permanent neonatal diabetes mellitus	Pathogenic(Last reviewed: Jul 5, 2011)	no assertion criteria provided	VCV000021197	11	17409142	11	17387595	21197	34049	rs80356618	NC_000011.10:17387594:C:T
NM_000525.4(KCNJ11):c.155A>G (p.Gln52Arg)	KCNJ11	Q52R	Permanent neonatal diabetes mellitus	Pathogenic(Last reviewed: Jul 5, 2011)	no assertion criteria provided	VCV000021196	11	17409484	11	17387937	21196	34048	rs193929337	NC_000011.10:17387936:T:C
NM_000525.4(KCNJ11):c.103T>G (p.Phe35Val)	KCNJ11	F35V	Permanent neonatal diabetes mellitus	Pathogenic(Last reviewed: Jul 5, 2011)	no assertion criteria provided	VCV000021195	11	17409536	11	17387989	21195	34047	rs193929333	NC_000011.10:17387988:A:C
NM_000525.4(KCNJ11):c.103T>C (p.Phe35Leu)	KCNJ11	F35L	Permanent neonatal diabetes mellitus	Pathogenic(Last reviewed: Jul 5, 2011)	no assertion criteria provided	VCV000021194	11	17409536	11	17387989	21194	34046	rs193929333	NC_000011.10:17387988:A:G
NM_000525.4(KCNJ11):c.1001G>A (p.Gly334Asp)	KCNJ11	G334D, G247D	Permanent neonatal diabetes mellitus	Pathogenic(Last reviewed: Jul 5, 2011)	no assertion criteria provided	VCV000021193	11	17408638	11	17387091	21193	34045	rs193929358	NC_000011.10:17387090:C:T
NM_000525.4(KCNJ11):c.844G>A (p.Glu282Lys)	KCNJ11	E282K, E195K	Hyperinsulinemic hypoglycemia, familial, 2|Maturity-onset diabetes of the young, type 13|Hyperinsulinemic hypoglycemia, familial, 2|Transient neonatal diabetes mellitus 3|Type 2 diabetes mellitus|Permanent neonatal diabetes mellitus	Pathogenic/Likely pathogenic(Last reviewed: Oct 31, 2018)	criteria provided, multiple submitters, no conflicts	VCV000008686	11	17408795	11	17387248	8686	23725	rs267607196	NC_000011.10:17387247:C:T
NM_000525.4(KCNJ11):c.158G>A (p.Gly53Asp)	KCNJ11	G53D	Permanent neonatal diabetes mellitus|Permanent neonatal diabetes mellitus 2	Pathogenic(Last reviewed: Jul 5, 2011)	no assertion criteria provided	VCV000008685	11	17409481	11	17387934	8685	23724	rs80356615	NC_000011.10:17387933:C:T
NM_000525.4(KCNJ11):c.466G>A (p.Gly156Arg)	KCNJ11	G156R, G69R	Hyperinsulinemic hypoglycemia, familial, 2	Pathogenic(Last reviewed: Aug 1, 2008)	no assertion criteria provided	VCV000008684	11	17409173	11	17387626	8684	23723	rs1404429785	NC_000011.10:17387625:C:T
NM_000525.4(KCNJ11):c.902G>A (p.Arg301His)	KCNJ11	R301H, R214H	Maturity-onset diabetes of the young, type 13|Hyperinsulinemic hypoglycemia, familial, 2|Transient neonatal diabetes mellitus 3|Permanent neonatal diabetes mellitus|not provided|Transient neonatal diabetes mellitus 3|Hyperinsulinemic hypoglycemia, familial, 2	Conflicting interpretations of pathogenicity(Last reviewed: Jul 12, 2020)	criteria provided, conflicting interpretations	VCV000008683	11	17408737	11	17387190	8683	23722	rs74339576	NC_000011.10:17387189:C:T
NM_000525.4(KCNJ11):c.157G>C (p.Gly53Arg)	KCNJ11	G53R	Transient neonatal diabetes mellitus 3	Pathogenic(Last reviewed: Jul 5, 2011)	no assertion criteria provided	VCV000008682	11	17409482	11	17387935	8682	23721	rs80356613	NC_000011.10:17387934:C:G
NM_000525.4(KCNJ11):c.157G>A (p.Gly53Ser)	KCNJ11	G53S	Transient neonatal diabetes mellitus 3	Pathogenic(Last reviewed: Jul 5, 2011)	no assertion criteria provided	VCV000008681	11	17409482	11	17387935	8681	23720	rs80356613	NC_000011.10:17387934:C:T
NM_000525.4(KCNJ11):c.499A>C (p.Ile167Leu)	KCNJ11	I167L, I80L	Permanent neonatal diabetes mellitus|Permanent neonatal diabetes mellitus 2	Pathogenic(Last reviewed: Jul 5, 2011)	no assertion criteria provided	VCV000008680	11	17409140	11	17387593	8680	23719	rs80356620	NC_000011.10:17387592:T:G
NM_000525.4(KCNJ11):c.497G>T (p.Cys166Phe)	KCNJ11	C166F, C79F	Permanent neonatal diabetes mellitus|Permanent neonatal diabetes mellitus 2	Pathogenic(Last reviewed: Jul 5, 2011)	no assertion criteria provided	VCV000008679	11	17409142	11	17387595	8679	23718	rs80356618	NC_000011.10:17387594:C:A
NM_000525.4(KCNJ11):c.776A>G (p.His259Arg)	KCNJ11	H259R, H172R	Hyperinsulinemic hypoglycemia, familial, 2|not provided	Pathogenic(Last reviewed: Jul 22, 2021)	criteria provided, multiple submitters, no conflicts	VCV000008677	11	17408863	11	17387316	8677	23716	rs104894248	NC_000011.10:17387315:T:C
NM_000525.4(KCNJ11):c.124T>C (p.Cys42Arg)	KCNJ11	C42R	Permanent neonatal diabetes mellitus|Maturity-onset diabetes of the young, type 13|Transient neonatal diabetes mellitus 3	Pathogenic(Last reviewed: Jul 5, 2011)	no assertion criteria provided	VCV000008676	11	17409515	11	17387968	8676	23715	rs80356610	NC_000011.10:17387967:A:G
NM_000525.4(KCNJ11):c.761C>T (p.Pro254Leu)	KCNJ11	P254L, P167L	Hyperinsulinemic hypoglycemia, familial, 2	Pathogenic(Last reviewed: Dec 1, 2004)	no assertion criteria provided	VCV000008675	11	17408878	11	17387331	8675	23714	rs104894237	NC_000011.10:17387330:G:A
NM_000525.4(KCNJ11):c.510G>C (p.Lys170Asn)	KCNJ11	K170N, K83N	Permanent neonatal diabetes mellitus|Permanent neonatal diabetes mellitus 2	Pathogenic(Last reviewed: Jul 5, 2011)	no assertion criteria provided	VCV000008672	11	17409129	11	17387582	8672	23711	rs80356622	NC_000011.10:17387581:C:G
NM_000525.4(KCNJ11):c.509A>G (p.Lys170Arg)	KCNJ11	K170R, K83R	Permanent neonatal diabetes mellitus|Permanent neonatal diabetes mellitus 2	Pathogenic(Last reviewed: Jul 5, 2011)	no assertion criteria provided	VCV000008671	11	17409130	11	17387583	8671	23710	rs80356621	NC_000011.10:17387582:T:C
NM_000525.4(KCNJ11):c.149G>C (p.Arg50Pro)	KCNJ11	R50P	Permanent neonatal diabetes mellitus|Permanent neonatal diabetes mellitus 2	Pathogenic(Last reviewed: Jul 5, 2011)	no assertion criteria provided	VCV000008670	11	17409490	11	17387943	8670	23709	rs80356611	NC_000011.10:17387942:C:G
NM_000525.4(KCNJ11):c.176T>G (p.Val59Gly)	KCNJ11	V59G	Permanent neonatal diabetes mellitus|Permanent neonatal diabetes mellitus 2	Pathogenic(Last reviewed: Jul 5, 2011)	no assertion criteria provided	VCV000008669	11	17409463	11	17387916	8669	23708	rs80356617	NC_000011.10:17387915:A:C
NM_000525.4(KCNJ11):c.601C>T (p.Arg201Cys)	KCNJ11	R201C, R114C	Diabetes mellitus|Permanent neonatal diabetes mellitus|Permanent neonatal diabetes mellitus 2|Transient neonatal diabetes mellitus 3	Pathogenic(Last reviewed: Feb 28, 2020)	criteria provided, multiple submitters, no conflicts	VCV000008668	11	17409038	11	17387491	8668	23707	rs80356625	NC_000011.10:17387490:G:A
NM_000525.4(KCNJ11):c.175G>A (p.Val59Met)	KCNJ11	V59M	Permanent neonatal diabetes mellitus|Permanent neonatal diabetes mellitus 2|not provided|Neonatal insulin-dependent diabetes mellitus	Pathogenic(Last reviewed: Apr 30, 2015)	criteria provided, multiple submitters, no conflicts	VCV000008667	11	17409464	11	17387917	8667	23706	rs80356616	NC_000011.10:17387916:C:T
NM_000525.4(KCNJ11):c.602G>A (p.Arg201His)	KCNJ11	R201H, R114H	Permanent neonatal diabetes mellitus|Permanent neonatal diabetes mellitus 2|not provided|Neonatal insulin-dependent diabetes mellitus|Transient neonatal diabetes mellitus 3	Pathogenic(Last reviewed: Aug 25, 2020)	criteria provided, multiple submitters, no conflicts	VCV000008666	11	17409037	11	17387490	8666	23705	rs80356624	NC_000011.10:17387489:C:T
NM_000525.4(KCNJ11):c.440T>C (p.Leu147Pro)	KCNJ11	L147P, L60P	Hyperinsulinemic hypoglycemia, familial, 2	Pathogenic(Last reviewed: Mar 16, 2015)	criteria provided, single submitter	VCV000008665	11	17409199	11	17387652	8665	23704	rs28936678	NC_000011.10:17387651:A:G
NM_021012.5(KCNJ12):c.364C>T (p.Pro122Ser)	KCNJ12	P122S	not provided	Uncertain significance	no assertion criteria provided	VCV001050773	17	21319018	17	21415706	1050773	1038513		NC_000017.11:21415705:C:T
NM_002242.4(KCNJ13):c.622C>G (p.Leu208Val)	KCNJ13|GIGYF2	L208V, L128V	not provided	Uncertain significance(Last reviewed: Aug 18, 2020)	criteria provided, single submitter	VCV001046410	2	233633362	2	232768652	1046410	1024251	rs770984701	NC_000002.12:232768651:G:C
NM_002242.4(KCNJ13):c.652T>C (p.Tyr218His)	KCNJ13|GIGYF2	Y138H, Y218H	not provided	Uncertain significance(Last reviewed: Sep 9, 2020)	criteria provided, single submitter	VCV001043797	2	233633332	2	232768622	1043797	1024250	rs139594245	NC_000002.12:232768621:A:G
NM_002242.4(KCNJ13):c.1043T>C (p.Ile348Thr)	KCNJ13|GIGYF2	I348T, I268T	not provided	Uncertain significance(Last reviewed: May 21, 2020)	criteria provided, single submitter	VCV001040258	2	233632941	2	232768231	1040258	1024248	rs545594184	NC_000002.12:232768230:A:G
NM_002242.4(KCNJ13):c.965T>C (p.Val322Ala)	KCNJ13|GIGYF2	V242A, V322A	not provided	Uncertain significance(Last reviewed: Sep 18, 2020)	criteria provided, single submitter	VCV001025652	2	233633019	2	232768309	1025652	1003793	rs1699061638	NC_000002.12:232768308:A:G
NM_002242.4(KCNJ13):c.722T>A (p.Leu241Gln)	KCNJ13|GIGYF2	L161Q, L241Q	not provided	Uncertain significance(Last reviewed: Oct 8, 2020)	criteria provided, single submitter	VCV001025287	2	233633262	2	232768552	1025287	1003795	rs143607153	NC_000002.12:232768551:A:T
NM_002242.4(KCNJ13):c.314G>T (p.Ser105Ile)	KCNJ13|GIGYF2	S105I, S25I	Leber congenital amaurosis 16	Likely pathogenic	no assertion criteria provided	VCV000978434	2	233635759	2	232771049	978434	966581	rs1699223440	NC_000002.12:232771048:C:A
NM_002242.4(KCNJ13):c.22G>C (p.Val8Leu)	KCNJ13|GIGYF2	V8L	not provided	Uncertain significance(Last reviewed: Sep 17, 2020)	criteria provided, single submitter	VCV000953725	2	233636051	2	232771341	953725	942680	rs757516316	NC_000002.12:232771340:C:G
NM_002242.4(KCNJ13):c.53G>A (p.Arg18Gln)	KCNJ13|GIGYF2	R18Q	not provided	Uncertain significance(Last reviewed: Aug 14, 2019)	criteria provided, single submitter	VCV000842121	2	233636020	2	232771310	842121	825968	rs144268831	NC_000002.12:232771309:C:T
NM_002242.4(KCNJ13):c.524C>T (p.Thr175Ile)	KCNJ13|GIGYF2	T175I, T95I	Leber congenital amaurosis 16|not provided	Benign(Last reviewed: Jun 19, 2021)	criteria provided, multiple submitters, no conflicts	VCV000335056	2	233633460	2	232768750	335056	288759	rs1801251	NC_000002.12:232768749:G:A
NM_002242.4(KCNJ13):c.548G>A (p.Gly183Asp)	KCNJ13|GIGYF2	G183D, G103D	Leber congenital amaurosis 16	Uncertain significance(Last reviewed: Jan 12, 2018)	criteria provided, single submitter	VCV000335055	2	233633436	2	232768726	335055	288741	rs886055797	NC_000002.12:232768725:C:T
NM_002242.4(KCNJ13):c.689G>A (p.Ser230Asn)	KCNJ13|GIGYF2	S230N, S150N	Leber congenital amaurosis 16|not provided	Uncertain significance(Last reviewed: Aug 20, 2020)	criteria provided, multiple submitters, no conflicts	VCV000335053	2	233633295	2	232768585	335053	288342	rs146797648	NC_000002.12:232768584:C:T
NM_002242.4(KCNJ13):c.359T>C (p.Ile120Thr)	KCNJ13|GIGYF2	I120T, I40T	Leber congenital amaurosis 16|not provided	Pathogenic/Likely pathogenic(Last reviewed: Mar 31, 2016)	no assertion criteria provided	VCV000191155	2	233635714	2	232771004	191155	188958	rs786205550	NC_000002.12:232771003:A:G
NM_002242.4(KCNJ13):c.484C>T (p.Arg162Trp)	KCNJ13|GIGYF2	R162W, P83L, R82W	not provided|Snowflake vitreoretinal degeneration	Pathogenic/Likely pathogenic(Last reviewed: Jan 30, 2021)	criteria provided, multiple submitters, no conflicts	VCV000006585	2	233633500	2	232768790	6585	21624	rs121918542	NC_000002.12:232768789:G:A
NM_170736.3(KCNJ15):c.16A>G (p.Ile6Val)	KCNJ15	I6V	not provided	Benign(Last reviewed: Jun 8, 2017)	criteria provided, single submitter	VCV000770817	21	39671199	21	38299277	770817	705692	rs79109585	NC_000021.9:38299276:A:G
NM_170741.4(KCNJ16):c.31A>G (p.Ile11Val)	KCNJ16	I11V	not provided	Benign(Last reviewed: May 4, 2021)	criteria provided, single submitter	VCV001266075	17	68128259	17	70132118	1266075	1257698		NC_000017.11:70132117:A:G
NM_170741.4(KCNJ16):c.191C>T (p.Thr64Ile)	KCNJ16		HYPOKALEMIC TUBULOPATHY AND DEAFNESS	Pathogenic(Last reviewed: Jun 28, 2021)	no assertion criteria provided	VCV001174521	17	68128419	17	70132278	1174521	1163801		NC_000017.11:70132277:C:T
NM_170741.4(KCNJ16):c.404G>C (p.Gly135Ala)	KCNJ16		HYPOKALEMIC TUBULOPATHY AND DEAFNESS	Pathogenic(Last reviewed: Jun 28, 2021)	no assertion criteria provided	VCV001174520	17	68128632	17	70132491	1174520	1163800		NC_000017.11:70132490:G:C
NM_170741.4(KCNJ16):c.749C>T (p.Pro250Leu)	KCNJ16		HYPOKALEMIC TUBULOPATHY AND DEAFNESS	Pathogenic(Last reviewed: Jun 28, 2021)	no assertion criteria provided	VCV001174519	17	68128977	17	70132836	1174519	1163799		NC_000017.11:70132835:C:T
NM_170741.4(KCNJ16):c.395T>G (p.Ile132Arg)	KCNJ16		HYPOKALEMIC TUBULOPATHY AND DEAFNESS	Pathogenic(Last reviewed: Jun 29, 2021)	no assertion criteria provided	VCV001174518	17	68128623	17	70132482	1174518	1163798		NC_000017.11:70132481:T:G
NM_170741.4(KCNJ16):c.409C>T (p.Arg137Cys)	KCNJ16		HYPOKALEMIC TUBULOPATHY AND DEAFNESS	Pathogenic(Last reviewed: Jun 28, 2021)	no assertion criteria provided	VCV001174516	17	68128637	17	70132496	1174516	1163796		NC_000017.11:70132495:C:T
NM_001194958.2(KCNJ18):c.655C>T (p.Arg219Cys)	KCNJ18	R219C	Thyrotoxic periodic paralysis 2	Uncertain significance(Last reviewed: Apr 24, 2017)	criteria provided, single submitter	VCV000448965			17	21703441	448965	442563	rs1469374904	NC_000017.11:21703440:C:T
NM_001194958.2(KCNJ18):c.598G>C (p.Ala200Pro)	KCNJ18	A200P	Thyrotoxic periodic paralysis, susceptibility to, 1	Pathogenic(Last reviewed: Jul 31, 2014)	no assertion criteria provided	VCV000143206	17	355749	17	21703384	143206	152924	rs527236155	NC_000017.11:21703383:G:C
NM_001194958.2(KCNJ18):c.502G>A (p.Val168Met)	KCNJ18	V168M	Thyrotoxic periodic paralysis, susceptibility to, 1	Pathogenic(Last reviewed: Jul 31, 2014)	no assertion criteria provided	VCV000143205	17	355653	17	21703288	143205	152923	rs527236154	NC_000017.11:21703287:G:A
NM_001194958.2(KCNJ18):c.419C>T (p.Thr140Met)	KCNJ18	T140M	Thyrotoxic periodic paralysis, susceptibility to, 1	Pathogenic(Last reviewed: Jul 31, 2014)	no assertion criteria provided	VCV000143203	17	355570	17	21703205	143203	152921	rs527236152	NC_000017.11:21703204:C:T
NM_001194958.2(KCNJ18):c.127C>T (p.Arg43Cys)	KCNJ18	R43C	Thyrotoxic periodic paralysis, susceptibility to, 1	Pathogenic(Last reviewed: Jul 31, 2014)	no assertion criteria provided	VCV000143202	17	355278	17	21702913	143202	152920	rs527236151	NC_000017.11:21702912:C:T
NM_001194958.2(KCNJ18):c.1097A>G (p.Lys366Arg)	KCNJ18	K366R	Thyrotoxic periodic paralysis, susceptibility to, 1|Thyrotoxic periodic paralysis 2	Pathogenic; risk factor(Last reviewed: Jul 31, 2014)	no assertion criteria provided	VCV000000207	17	356248	17	21703883	207	15246	rs527236159	NC_000017.11:21703882:A:G
NM_001194958.2(KCNJ18):c.614G>A (p.Arg205His)	KCNJ18	R205H	Thyrotoxic periodic paralysis 2	risk factor(Last reviewed: Jan 8, 2010)	no assertion criteria provided	VCV000000206	17	355765	17	21703400	206	15245	rs672601244	NC_000017.11:21703399:G:A
NM_001194958.2(KCNJ18):c.1061C>T (p.Thr354Met)	KCNJ18	T354M	Thyrotoxic periodic paralysis, susceptibility to, 1|Thyrotoxic periodic paralysis 2	Pathogenic; risk factor(Last reviewed: Jul 31, 2014)	no assertion criteria provided	VCV000000205	17	356212	17	21703847	205	15244	rs527236158	NC_000017.11:21703846:C:T
NM_000891.3(KCNJ2):c.1106C>T (p.Ser369Leu)	KCNJ2	S369L	not provided	Uncertain significance	no assertion criteria provided	VCV001328068	17	68172286	17	70176145	1328068	1318687		NC_000017.11:70176144:C:T
NM_000891.3(KCNJ2):c.436G>C (p.Gly146Arg)	KCNJ2	G146R	not provided	Uncertain significance(Last reviewed: May 10, 2021)	criteria provided, single submitter	VCV001327728	17	68171616	17	70175475	1327728	1318347		NC_000017.11:70175474:G:C
NM_000891.3(KCNJ2):c.166G>A (p.Val56Ile)	KCNJ2	V56I	not provided	Uncertain significance(Last reviewed: Aug 7, 2019)	criteria provided, single submitter	VCV001307723	17	68171346	17	70175205	1307723	1297671		NC_000017.11:70175204:G:A
NM_000891.3(KCNJ2):c.778C>T (p.Arg260Cys)	KCNJ2	R260C	not provided	Uncertain significance(Last reviewed: Jun 24, 2020)	criteria provided, single submitter	VCV001306566	17	68171958	17	70175817	1306566	1296509		NC_000017.11:70175816:C:T
NM_000891.3(KCNJ2):c.346T>C (p.Ser116Pro)	KCNJ2	S116P	not provided	Uncertain significance(Last reviewed: Jul 10, 2019)	criteria provided, single submitter	VCV001302594	17	68171526	17	70175385	1302594	1292875		NC_000017.11:70175384:T:C
NM_000891.3(KCNJ2):c.1222C>G (p.Leu408Val)	KCNJ2	L408V	not provided	Likely benign(Last reviewed: Jan 22, 2019)	criteria provided, single submitter	VCV001194680	17	68172402	17	70176261	1194680	1185307		NC_000017.11:70176260:C:G
NM_000891.3(KCNJ2):c.97G>A (p.Gly33Arg)	KCNJ2	G33R	not provided	Uncertain significance(Last reviewed: Mar 19, 2020)	criteria provided, single submitter	VCV001163708	17	68171277	17	70175136	1163708	1152795		NC_000017.11:70175135:G:A
NM_000891.3(KCNJ2):c.523A>C (p.Ile175Leu)	KCNJ2	I175L	Andersen Tawil syndrome|Short QT syndrome 3	Uncertain significance(Last reviewed: Jan 15, 2020)	criteria provided, single submitter	VCV001060569	17	68171703	17	70175562	1060569	1050624		NC_000017.11:70175561:A:C
NM_000891.3(KCNJ2):c.922A>T (p.Thr308Ser)	KCNJ2	T308S	Short QT syndrome 3|Andersen Tawil syndrome	Uncertain significance(Last reviewed: Sep 15, 2020)	criteria provided, single submitter	VCV001058217	17	68172102	17	70175961	1058217	1050625		NC_000017.11:70175960:A:T
NM_000891.3(KCNJ2):c.239G>A (p.Arg80His)	KCNJ2	R80H	Short QT syndrome 3|Andersen Tawil syndrome	Uncertain significance(Last reviewed: Jul 15, 2020)	criteria provided, single submitter	VCV001056927	17	68171419	17	70175278	1056927	1050623		NC_000017.11:70175277:G:A
NM_000891.3(KCNJ2):c.128G>A (p.Cys43Tyr)	KCNJ2	C43Y	Andersen Tawil syndrome|Short QT syndrome 3	Uncertain significance(Last reviewed: Sep 17, 2020)	criteria provided, single submitter	VCV001054264	17	68171308	17	70175167	1054264	1050622		NC_000017.11:70175166:G:A
NM_000891.3(KCNJ2):c.14G>A (p.Arg5Gln)	KCNJ2	R5Q	Andersen Tawil syndrome|Short QT syndrome 3	Uncertain significance(Last reviewed: Jun 16, 2020)	criteria provided, single submitter	VCV001052929	17	68171194	17	70175053	1052929	1050621		NC_000017.11:70175052:G:A
NM_000891.3(KCNJ2):c.238C>T (p.Arg80Cys)	KCNJ2	R80C	Andersen Tawil syndrome|Short QT syndrome 3	Uncertain significance(Last reviewed: Apr 28, 2020)	criteria provided, single submitter	VCV001042197	17	68171418	17	70175277	1042197	1033612	rs2074385891	NC_000017.11:70175276:C:T
NM_000891.3(KCNJ2):c.784T>G (p.Phe262Val)	KCNJ2	F262V	Short QT syndrome 3|Andersen Tawil syndrome	Uncertain significance(Last reviewed: Apr 22, 2020)	criteria provided, single submitter	VCV001024344	17	68171964	17	70175823	1024344	1013090	rs2074389312	NC_000017.11:70175822:T:G
NM_000891.3(KCNJ2):c.799A>G (p.Ile267Val)	KCNJ2	I267V	not provided	Uncertain significance(Last reviewed: Dec 1, 2020)	criteria provided, single submitter	VCV001012428	17	68171979	17	70175838	1012428	1001032	rs746052198	NC_000017.11:70175837:A:G
NM_000891.3(KCNJ2):c.481G>A (p.Val161Met)	KCNJ2	V161M	Andersen Tawil syndrome|Short QT syndrome 3	Uncertain significance(Last reviewed: Aug 6, 2020)	criteria provided, single submitter	VCV001006036	17	68171661	17	70175520	1006036	997901	rs2074387480	NC_000017.11:70175519:G:A
NM_000891.3(KCNJ2):c.659G>A (p.Ser220Asn)	KCNJ2	S220N	Andersen Tawil syndrome|Short QT syndrome 3	Uncertain significance(Last reviewed: Sep 9, 2020)	criteria provided, single submitter	VCV001004911	17	68171839	17	70175698	1004911	997903	rs2074388522	NC_000017.11:70175697:G:A
NM_000891.3(KCNJ2):c.499G>T (p.Val167Leu)	KCNJ2	V167L	Andersen Tawil syndrome|Short QT syndrome 3	Uncertain significance(Last reviewed: Jun 10, 2020)	criteria provided, single submitter	VCV001002315	17	68171679	17	70175538	1002315	997902	rs140147979	NC_000017.11:70175537:G:T
NM_000891.3(KCNJ2):c.637C>G (p.Arg213Gly)	KCNJ2	R213G	not provided	Likely pathogenic(Last reviewed: Mar 27, 2020)	criteria provided, single submitter	VCV000995608	17	68171817	17	70175676	995608	982121	rs764523123	NC_000017.11:70175675:C:G
NM_000891.3(KCNJ2):c.102G>T (p.Lys34Asn)	KCNJ2	K34N	Andersen Tawil syndrome	Uncertain significance	criteria provided, single submitter	VCV000979139	17	68171282	17	70175141	979139	967210	rs1476737505	NC_000017.11:70175140:G:T
NM_000891.3(KCNJ2):c.83A>G (p.Asn28Ser)	KCNJ2	N28S	Brugada syndrome	Uncertain significance(Last reviewed: Apr 7, 2020)	no assertion criteria provided	VCV000977182	17	68171263	17	70175122	977182	965311	rs2074384666	NC_000017.11:70175121:A:G
NM_000891.3(KCNJ2):c.389C>T (p.Thr130Met)	KCNJ2	T130M	not provided|Short QT syndrome 3|Andersen Tawil syndrome	Uncertain significance(Last reviewed: Oct 4, 2021)	criteria provided, multiple submitters, no conflicts	VCV000969996	17	68171569	17	70175428	969996	958288	rs151168735	NC_000017.11:70175427:C:T
NM_000891.3(KCNJ2):c.511A>G (p.Ile171Val)	KCNJ2	I171V	Andersen Tawil syndrome|Short QT syndrome 3	Uncertain significance(Last reviewed: Oct 8, 2020)	criteria provided, single submitter	VCV000964778	17	68171691	17	70175550	964778	958289	rs150326473	NC_000017.11:70175549:A:G
NM_000891.3(KCNJ2):c.868G>A (p.Ala290Thr)	KCNJ2	A290T	Andersen Tawil syndrome|Short QT syndrome 3	Uncertain significance(Last reviewed: Oct 8, 2019)	criteria provided, single submitter	VCV000955520	17	68172048	17	70175907	955520	950260	rs895505794	NC_000017.11:70175906:G:A
NM_000891.3(KCNJ2):c.532G>A (p.Ala178Thr)	KCNJ2	A178T	Andersen Tawil syndrome|Short QT syndrome 3	Uncertain significance(Last reviewed: Jun 4, 2019)	criteria provided, single submitter	VCV000952628	17	68171712	17	70175571	952628	928519	rs771965504	NC_000017.11:70175570:G:A
NM_000891.3(KCNJ2):c.859A>C (p.Ile287Leu)	KCNJ2	I287L	Andersen Tawil syndrome|Short QT syndrome 3	Uncertain significance(Last reviewed: Jul 12, 2019)	criteria provided, single submitter	VCV000951649	17	68172039	17	70175898	951649	928520	rs758054840	NC_000017.11:70175897:A:C
NM_000891.3(KCNJ2):c.883G>A (p.Val295Met)	KCNJ2	V295M	Andersen Tawil syndrome|Short QT syndrome 3	Uncertain significance(Last reviewed: Jul 22, 2019)	criteria provided, single submitter	VCV000948159	17	68172063	17	70175922	948159	928521	rs2074389817	NC_000017.11:70175921:G:A
NM_000891.3(KCNJ2):c.394G>A (p.Ala132Thr)	KCNJ2	A132T	Andersen Tawil syndrome|Short QT syndrome 3	Uncertain significance(Last reviewed: Sep 15, 2019)	criteria provided, single submitter	VCV000943817	17	68171574	17	70175433	943817	938204	rs2074386902	NC_000017.11:70175432:G:A
NM_000891.3(KCNJ2):c.647A>T (p.Asn216Ile)	KCNJ2	N216I	Short QT syndrome 3|Andersen Tawil syndrome	Uncertain significance(Last reviewed: Nov 12, 2019)	criteria provided, single submitter	VCV000936451	17	68171827	17	70175686	936451	938205	rs2074388429	NC_000017.11:70175685:A:T
NM_000891.3(KCNJ2):c.578T>C (p.Leu193Pro)	KCNJ2	L193P	Andersen Tawil syndrome|not provided	Conflicting interpretations of pathogenicity(Last reviewed: Nov 22, 2019)	criteria provided, conflicting interpretations	VCV000932125	17	68171758	17	70175617	932125	919766	rs1555603955	NC_000017.11:70175616:T:C
NM_000891.3(KCNJ2):c.1211C>G (p.Pro404Arg)	KCNJ2	P404R	Short QT syndrome 3|Atrial fibrillation, familial, 9|Andersen Tawil syndrome	Uncertain significance(Last reviewed: Jan 13, 2018)	criteria provided, single submitter	VCV000890719	17	68172391	17	70176250	890719	878294	rs760459401	NC_000017.11:70176249:C:G
NM_000891.3(KCNJ2):c.22C>T (p.Arg8Cys)	KCNJ2	R8C	Short QT syndrome 3|Andersen Tawil syndrome|Short QT syndrome 3|Atrial fibrillation, familial, 9|Andersen Tawil syndrome	Uncertain significance(Last reviewed: Aug 9, 2019)	criteria provided, multiple submitters, no conflicts	VCV000890665	17	68171202	17	70175061	890665	878292	rs529080615	NC_000017.11:70175060:C:T
NM_000891.3(KCNJ2):c.341A>G (p.Asp114Gly)	KCNJ2	D114G	Short QT syndrome 3|Andersen Tawil syndrome|Atrial fibrillation, familial, 9	Uncertain significance(Last reviewed: Apr 27, 2017)	criteria provided, single submitter	VCV000889453	17	68171521	17	70175380	889453	878293	rs2074386589	NC_000017.11:70175379:A:G
NM_000891.3(KCNJ2):c.1196G>A (p.Ser399Asn)	KCNJ2	S399N	Andersen Tawil syndrome|Short QT syndrome 3	Uncertain significance(Last reviewed: Feb 15, 2020)	criteria provided, single submitter	VCV000863721	17	68172376	17	70176235	863721	846139	rs1598211624	NC_000017.11:70176234:G:A
NM_000891.3(KCNJ2):c.434A>G (p.Tyr145Cys)	KCNJ2	Y145C	Andersen Tawil syndrome|Short QT syndrome 3	Likely pathogenic(Last reviewed: Jul 20, 2019)	criteria provided, single submitter	VCV000858285	17	68171614	17	70175473	858285	846137	rs2074387117	NC_000017.11:70175472:A:G
NM_000891.3(KCNJ2):c.373G>A (p.Glu125Lys)	KCNJ2	E125K	Andersen Tawil syndrome|Short QT syndrome 3	Uncertain significance(Last reviewed: Mar 14, 2019)	criteria provided, single submitter	VCV000850900	17	68171553	17	70175412	850900	846136	rs2074386756	NC_000017.11:70175411:G:A
NM_000891.3(KCNJ2):c.23G>A (p.Arg8His)	KCNJ2	R8H	Andersen Tawil syndrome|Short QT syndrome 3	Uncertain significance(Last reviewed: Mar 26, 2019)	criteria provided, single submitter	VCV000844830	17	68171203	17	70175062	844830	846135	rs140090605	NC_000017.11:70175061:G:A
NM_000891.3(KCNJ2):c.1165G>A (p.Asp389Asn)	KCNJ2	D389N	Andersen Tawil syndrome|Short QT syndrome 3	Uncertain significance(Last reviewed: May 26, 2020)	criteria provided, single submitter	VCV000842216	17	68172345	17	70176204	842216	846138	rs140053197	NC_000017.11:70176203:G:A
NM_000891.3(KCNJ2):c.941C>T (p.Ser314Phe)	KCNJ2	S314F	not provided	Uncertain significance(Last reviewed: Dec 1, 2018)	criteria provided, single submitter	VCV000808314	17	68172121	17	70175980	808314	797597	rs1598211503	NC_000017.11:70175979:C:T
NM_000891.3(KCNJ2):c.781A>G (p.Ile261Val)	KCNJ2	I261V	Hypertrophic cardiomyopathy|Andersen Tawil syndrome|Short QT syndrome 3|not provided	Uncertain significance(Last reviewed: Jul 9, 2020)	criteria provided, multiple submitters, no conflicts	VCV000691668	17	68171961	17	70175820	691668	679470	rs774461588	NC_000017.11:70175819:A:G
NM_000891.3(KCNJ2):c.896A>G (p.Glu299Gly)	KCNJ2	E299G	Andersen Tawil syndrome|Short QT syndrome 3|Atrial fibrillation, familial, 9	Likely pathogenic(Last reviewed: Dec 31, 2017)	criteria provided, single submitter	VCV000689769	17	68172076	17	70175935	689769	677457	rs786205817	NC_000017.11:70175934:A:G
NM_000891.3(KCNJ2):c.461G>A (p.Cys154Tyr)	KCNJ2	C154Y	Andersen Tawil syndrome|Andersen Tawil syndrome|Short QT syndrome 3	Conflicting interpretations of pathogenicity(Last reviewed: Sep 25, 2019)	criteria provided, conflicting interpretations	VCV000684808	17	68171641	17	70175500	684808	672444	rs199473380	NC_000017.11:70175499:G:A
NM_000891.3(KCNJ2):c.929A>G (p.Gln310Arg)	KCNJ2	Q310R	Andersen Tawil syndrome|Short QT syndrome 3	Uncertain significance(Last reviewed: Jul 17, 2018)	criteria provided, single submitter	VCV000663978	17	68172109	17	70175968	663978	646642	rs1598211487	NC_000017.11:70175967:A:G
NM_000891.3(KCNJ2):c.101A>G (p.Lys34Arg)	KCNJ2	K34R	Andersen Tawil syndrome|Short QT syndrome 3	Uncertain significance(Last reviewed: Dec 4, 2018)	criteria provided, single submitter	VCV000661299	17	68171281	17	70175140	661299	646634	rs772815957	NC_000017.11:70175139:A:G
NM_000891.3(KCNJ2):c.566G>C (p.Arg189Thr)	KCNJ2	R189T	Andersen Tawil syndrome|Short QT syndrome 3	Uncertain significance(Last reviewed: Dec 21, 2018)	criteria provided, single submitter	VCV000660794	17	68171746	17	70175605	660794	646640	rs199473381	NC_000017.11:70175604:G:C
NM_000891.3(KCNJ2):c.1067G>T (p.Cys356Phe)	KCNJ2	C356F	Short QT syndrome 3|Andersen Tawil syndrome	Uncertain significance(Last reviewed: Nov 19, 2018)	criteria provided, single submitter	VCV000658326	17	68172247	17	70176106	658326	646643	rs368406938	NC_000017.11:70176105:G:T
NM_000891.3(KCNJ2):c.259A>G (p.Ile87Val)	KCNJ2	I87V	Andersen Tawil syndrome|Short QT syndrome 3	Uncertain significance(Last reviewed: Dec 24, 2018)	criteria provided, single submitter	VCV000656328	17	68171439	17	70175298	656328	646637	rs748958117	NC_000017.11:70175297:A:G
NM_000891.3(KCNJ2):c.299G>T (p.Gly100Val)	KCNJ2	G100V	Andersen Tawil syndrome|Short QT syndrome 3	Uncertain significance(Last reviewed: Nov 7, 2018)	criteria provided, single submitter	VCV000654361	17	68171479	17	70175338	654361	646638	rs1598211153	NC_000017.11:70175337:G:T
NM_000891.3(KCNJ2):c.557C>A (p.Pro186Gln)	KCNJ2	P186Q	Short QT syndrome 3|Andersen Tawil syndrome	Likely pathogenic(Last reviewed: Dec 14, 2019)	criteria provided, single submitter	VCV000652820	17	68171737	17	70175596	652820	646639	rs104894581	NC_000017.11:70175595:C:A
NM_000891.3(KCNJ2):c.232G>C (p.Asp78His)	KCNJ2	D78H	Short QT syndrome 3|Andersen Tawil syndrome	Uncertain significance(Last reviewed: Oct 29, 2018)	criteria provided, single submitter	VCV000649015	17	68171412	17	70175271	649015	646636	rs199473372	NC_000017.11:70175270:G:C
NM_000891.3(KCNJ2):c.569A>T (p.Asn190Ile)	KCNJ2	N190I	Andersen Tawil syndrome|Short QT syndrome 3	Uncertain significance(Last reviewed: Feb 15, 2020)	criteria provided, single submitter	VCV000642863	17	68171749	17	70175608	642863	646641	rs1598211282	NC_000017.11:70175607:A:T
NM_000891.3(KCNJ2):c.158A>G (p.His53Arg)	KCNJ2	H53R	Short QT syndrome 3|Andersen Tawil syndrome	Uncertain significance(Last reviewed: Nov 14, 2018)	criteria provided, single submitter	VCV000640748	17	68171338	17	70175197	640748	646635	rs1598211051	NC_000017.11:70175196:A:G
NM_000891.3(KCNJ2):c.794C>T (p.Ser265Phe)	KCNJ2	S265F	Andersen Tawil syndrome	Uncertain significance(Last reviewed: Oct 25, 2018)	criteria provided, multiple submitters, no conflicts	VCV000637983	17	68171974	17	70175833	637983	625822	rs1598211406	NC_000017.11:70175832:C:T
NM_000891.3(KCNJ2):c.1196G>C (p.Ser399Thr)	KCNJ2	S399T	Andersen Tawil syndrome|Andersen Tawil syndrome|Short QT syndrome 3	Uncertain significance(Last reviewed: Mar 14, 2019)	criteria provided, multiple submitters, no conflicts	VCV000637982	17	68172376	17	70176235	637982	625823	rs1598211624	NC_000017.11:70176234:G:C
NM_000891.3(KCNJ2):c.1190G>A (p.Ser397Asn)	KCNJ2	S397N	Short QT syndrome 3|Andersen Tawil syndrome	Uncertain significance(Last reviewed: Jun 18, 2018)	criteria provided, single submitter	VCV000566184	17	68172370	17	70176229	566184	569694	rs1567823283	NC_000017.11:70176228:G:A
NM_000891.3(KCNJ2):c.326T>C (p.Leu109Pro)	KCNJ2	L109P	Short QT syndrome 3|Andersen Tawil syndrome	Uncertain significance(Last reviewed: Mar 13, 2018)	criteria provided, single submitter	VCV000566054	17	68171506	17	70175365	566054	569686	rs1567822991	NC_000017.11:70175364:T:C
NM_000891.3(KCNJ2):c.665T>C (p.Leu222Ser)	KCNJ2	L222S	not provided	Likely pathogenic(Last reviewed: May 16, 2018)	criteria provided, single submitter	VCV000546134	17	68171845	17	70175704	546134	536956	rs1555603968	NC_000017.11:70175703:T:C
NM_000891.3(KCNJ2):c.52G>A (p.Gly18Ser)	KCNJ2	G18S	Andersen Tawil syndrome|Short QT syndrome 3	Uncertain significance(Last reviewed: Oct 25, 2017)	criteria provided, single submitter	VCV000536360	17	68171232	17	70175091	536360	532098	rs947488726	NC_000017.11:70175090:G:A
NM_000891.3(KCNJ2):c.155G>T (p.Gly52Val)	KCNJ2	G52V	not specified	Uncertain significance(Last reviewed: Jun 28, 2016)	criteria provided, single submitter	VCV000523694	17	68171335	17	70175194	523694	514361	rs1555603894	NC_000017.11:70175193:G:T
NM_000891.3(KCNJ2):c.365G>A (p.Cys122Tyr)	KCNJ2	C122Y	Cardiovascular phenotype	Uncertain significance(Last reviewed: Dec 14, 2017)	criteria provided, single submitter	VCV000519550	17	68171545	17	70175404	519550	510755	rs1555603931	NC_000017.11:70175403:G:A
NM_000891.3(KCNJ2):c.919A>G (p.Met307Val)	KCNJ2	M307V	Cardiovascular phenotype|Short QT syndrome 3|Andersen Tawil syndrome	Conflicting interpretations of pathogenicity(Last reviewed: Dec 11, 2017)	criteria provided, conflicting interpretations	VCV000519476	17	68172099	17	70175958	519476	510757	rs1555603994	NC_000017.11:70175957:A:G
NM_000891.3(KCNJ2):c.510C>G (p.Ile170Met)	KCNJ2	I170M	Cardiovascular phenotype	Uncertain significance(Last reviewed: Jul 27, 2016)	criteria provided, single submitter	VCV000519302	17	68171690	17	70175549	519302	510756	rs1555603943	NC_000017.11:70175548:C:G
NM_000891.3(KCNJ2):c.1205C>T (p.Thr402Met)	KCNJ2	T402M	not specified|Andersen Tawil syndrome|Short QT syndrome 3|Cardiovascular phenotype	Uncertain significance(Last reviewed: Sep 24, 2020)	criteria provided, multiple submitters, no conflicts	VCV000518798	17	68172385	17	70176244	518798	510758	rs759070406	NC_000017.11:70176243:C:T
NM_000891.3(KCNJ2):c.49G>A (p.Asp17Asn)	KCNJ2	D17N	Wolff-Parkinson-White pattern	Uncertain significance(Last reviewed: Jul 14, 2017)	no assertion criteria provided	VCV000487624	17	68171229	17	70175088	487624	480723	rs1331601602	NC_000017.11:70175087:G:A
NM_000891.3(KCNJ2):c.845T>G (p.Leu282Trp)	KCNJ2	L282W	Short QT syndrome 3|Andersen Tawil syndrome|Atrial fibrillation, familial, 9|Andersen Tawil syndrome|Short QT syndrome 3	Uncertain significance(Last reviewed: Jun 26, 2019)	criteria provided, multiple submitters, no conflicts	VCV000468468	17	68172025	17	70175884	468468	468771	rs758092571	NC_000017.11:70175883:T:G
NM_000891.3(KCNJ2):c.668T>G (p.Val223Gly)	KCNJ2	V223G	Short QT syndrome 3|Andersen Tawil syndrome	Uncertain significance(Last reviewed: Nov 1, 2017)	criteria provided, single submitter	VCV000468467	17	68171848	17	70175707	468467	467401	rs1555603969	NC_000017.11:70175706:T:G
NM_000891.3(KCNJ2):c.410T>A (p.Ile137Asn)	KCNJ2	I137N	Short QT syndrome 3|Andersen Tawil syndrome	Uncertain significance(Last reviewed: Jun 19, 2017)	criteria provided, single submitter	VCV000468466	17	68171590	17	70175449	468466	468769	rs772055408	NC_000017.11:70175448:T:A
NM_000891.3(KCNJ2):c.1112C>A (p.Ala371Glu)	KCNJ2	A371E	Short QT syndrome 3|Andersen Tawil syndrome	Uncertain significance(Last reviewed: Feb 7, 2017)	criteria provided, single submitter	VCV000468462	17	68172292	17	70176151	468462	467416	rs780233256	NC_000017.11:70176150:C:A
NM_000891.3(KCNJ2):c.752A>G (p.Asn251Ser)	KCNJ2	N251S	not provided	Uncertain significance(Last reviewed: Nov 6, 2017)	criteria provided, single submitter	VCV000453204	17	68171932	17	70175791	453204	445879	rs1261477163	NC_000017.11:70175790:A:G
NM_000891.3(KCNJ2):c.529G>A (p.Gly177Ser)	KCNJ2	G177S	not provided	Uncertain significance(Last reviewed: Jan 4, 2021)	criteria provided, single submitter	VCV000451172	17	68171709	17	70175568	451172	445878	rs1555603949	NC_000017.11:70175567:G:A
NM_000891.3(KCNJ2):c.302G>T (p.Cys101Phe)	KCNJ2	C101F	not provided	Uncertain significance(Last reviewed: Jul 1, 2018)	criteria provided, multiple submitters, no conflicts	VCV000449152	17	68171482	17	70175341	449152	445877	rs750630010	NC_000017.11:70175340:G:T
NM_000891.3(KCNJ2):c.578T>A (p.Leu193His)	KCNJ2	L193H	Short QT syndrome 3|Andersen Tawil syndrome|not specified	Uncertain significance(Last reviewed: Nov 7, 2019)	criteria provided, multiple submitters, no conflicts	VCV000447638	17	68171758	17	70175617	447638	442013	rs1555603955	NC_000017.11:70175616:T:A
NM_000891.3(KCNJ2):c.388A>G (p.Thr130Ala)	KCNJ2	T130A	Andersen Tawil syndrome	Uncertain significance(Last reviewed: Jul 20, 2017)	criteria provided, single submitter	VCV000446416	17	68171568	17	70175427	446416	439887	rs1555603936	NC_000017.11:70175426:A:G
NM_000891.3(KCNJ2):c.359A>C (p.Lys120Thr)	KCNJ2	K120T	not provided|Andersen Tawil syndrome|Short QT syndrome 3	Uncertain significance(Last reviewed: Oct 28, 2020)	criteria provided, multiple submitters, no conflicts	VCV000432434	17	68171539	17	70175398	432434	426246	rs375646186	NC_000017.11:70175397:A:C
NM_000891.3(KCNJ2):c.974G>A (p.Arg325His)	KCNJ2	R325H	not provided	Uncertain significance(Last reviewed: May 30, 2017)	criteria provided, single submitter	VCV000431842	17	68172154	17	70176013	431842	426247	rs1555604000	NC_000017.11:70176012:G:A
NM_000891.3(KCNJ2):c.653G>C (p.Arg218Pro)	KCNJ2	R218P	not provided	Likely pathogenic(Last reviewed: May 19, 2017)	criteria provided, single submitter	VCV000430545	17	68171833	17	70175692	430545	422192	rs199473384	NC_000017.11:70175691:G:C
NM_000891.3(KCNJ2):c.565A>G (p.Arg189Gly)	KCNJ2	R189G	not provided	Likely pathogenic(Last reviewed: Sep 22, 2015)	criteria provided, single submitter	VCV000429589	17	68171745	17	70175604	429589	422191	rs1131691475	NC_000017.11:70175603:A:G
NM_000891.3(KCNJ2):c.208G>T (p.Ala70Ser)	KCNJ2	A70S	Short QT syndrome 3|Andersen Tawil syndrome|not provided	Uncertain significance(Last reviewed: Jan 22, 2021)	criteria provided, multiple submitters, no conflicts	VCV000403977	17	68171388	17	70175247	403977	403117	rs375605948	NC_000017.11:70175246:G:T
NM_000891.3(KCNJ2):c.119G>C (p.Arg40Pro)	KCNJ2	R40P	Short QT syndrome 3|Andersen Tawil syndrome	Uncertain significance(Last reviewed: Dec 8, 2016)	criteria provided, single submitter	VCV000403976	17	68171299	17	70175158	403976	402503	rs766143485	NC_000017.11:70175157:G:C
NM_000891.3(KCNJ2):c.1091A>G (p.Lys364Arg)	KCNJ2	K364R	not provided|Short QT syndrome 3|Andersen Tawil syndrome	Uncertain significance(Last reviewed: Oct 29, 2016)	criteria provided, single submitter	VCV000403975	17	68172271	17	70176130	403975	402505	rs1060500054	NC_000017.11:70176129:A:G
NM_000891.3(KCNJ2):c.416C>T (p.Thr139Ile)	KCNJ2	T139I	Short QT syndrome 3|Andersen Tawil syndrome|not provided	Uncertain significance(Last reviewed: Nov 3, 2020)	criteria provided, multiple submitters, no conflicts	VCV000403973	17	68171596	17	70175455	403973	402975	rs1060500052	NC_000017.11:70175454:C:T
NM_000891.3(KCNJ2):c.901A>C (p.Met301Leu)	KCNJ2	M301L	not provided|Short QT syndrome 3|Andersen Tawil syndrome	Conflicting interpretations of pathogenicity(Last reviewed: Mar 16, 2017)	criteria provided, conflicting interpretations	VCV000378921	17	68172081	17	70175940	378921	378738	rs786205818	NC_000017.11:70175939:A:C
NM_000891.3(KCNJ2):c.344C>T (p.Ala115Val)	KCNJ2	A115V	Atrial fibrillation, familial, 9|Short QT syndrome 3|Andersen Tawil syndrome	Uncertain significance(Last reviewed: Jan 12, 2018)	criteria provided, single submitter	VCV000324831	17	68171524	17	70175383	324831	346986	rs886053323	NC_000017.11:70175382:C:T
NM_000891.3(KCNJ2):c.119G>A (p.Arg40Gln)	KCNJ2	R40Q	Atrial fibrillation, familial, 9|SUDDEN INFANT DEATH SYNDROME|Short QT syndrome 3|Andersen Tawil syndrome|not provided|Andersen Tawil syndrome|Short QT syndrome 3	Uncertain significance(Last reviewed: Oct 1, 2021)	criteria provided, multiple submitters, no conflicts	VCV000324830	17	68171299	17	70175158	324830	329625	rs766143485	NC_000017.11:70175157:G:A
NM_000891.3(KCNJ2):c.806T>A (p.Ile269Lys)	KCNJ2	I269K	not provided	Uncertain significance(Last reviewed: Jul 10, 2015)	criteria provided, single submitter	VCV000281661	17	68171986	17	70175845	281661	265898	rs886042211	NC_000017.11:70175844:T:A
NM_000891.3(KCNJ2):c.616G>A (p.Gly206Ser)	KCNJ2	G206S	Short QT syndrome 3|Andersen Tawil syndrome|not specified|not provided	Uncertain significance(Last reviewed: Apr 13, 2020)	criteria provided, multiple submitters, no conflicts	VCV000281601	17	68171796	17	70175655	281601	265838	rs141035459	NC_000017.11:70175654:G:A
NM_000891.3(KCNJ2):c.1259C>T (p.Pro420Leu)	KCNJ2	P420L	Cardiovascular phenotype|short QT syndrome|Familial atrial fibrillation|Short QT syndrome 3|Andersen Tawil syndrome|Andersen Tawil syndrome	Conflicting interpretations of pathogenicity(Last reviewed: Aug 14, 2020)	criteria provided, conflicting interpretations	VCV000264482	17	68172439	17	70176298	264482	259021	rs749707062	NC_000017.11:70176297:C:T
NM_000891.3(KCNJ2):c.902T>G (p.Met301Arg)	KCNJ2	M301R	not provided	Pathogenic(Last reviewed: Jan 13, 2016)	criteria provided, single submitter	VCV000234729	17	68172082	17	70175941	234729	232033	rs876661184	NC_000017.11:70175940:T:G
NM_000891.3(KCNJ2):c.1268G>A (p.Arg423Gln)	KCNJ2	R423Q	Long QT syndrome|Short QT syndrome 3|Andersen Tawil syndrome	Uncertain significance(Last reviewed: Apr 9, 2019)	criteria provided, multiple submitters, no conflicts	VCV000222677	17	68172448	17	70176307	222677	224522	rs745372216	NC_000017.11:70176306:G:A
NM_000891.3(KCNJ2):c.211G>C (p.Asp71His)	KCNJ2	D71H	Andersen Tawil syndrome|Andersen Tawil syndrome|Short QT syndrome 3	Conflicting interpretations of pathogenicity(Last reviewed: Jan 9, 2019)	criteria provided, conflicting interpretations	VCV000222676	17	68171391	17	70175250	222676	224521	rs199473369	NC_000017.11:70175249:G:C
NM_000891.3(KCNJ2):c.966G>C (p.Trp322Cys)	KCNJ2		Andersen Tawil syndrome	Pathogenic(Last reviewed: Aug 6, 2015)	no assertion criteria provided	VCV000208081	17	68172146	17	70176005	208081	204360	rs797044842	NC_000017.11:70176004:G:C
NM_000891.3(KCNJ2):c.1217T>C (p.Ile406Thr)	KCNJ2	I406T	not provided	Uncertain significance(Last reviewed: Jun 24, 2013)	criteria provided, single submitter	VCV000191475	17	68172397	17	70176256	191475	189368	rs202149686	NC_000017.11:70176255:T:C
NM_000891.3(KCNJ2):c.884T>C (p.Val295Ala)	KCNJ2	V295A	not provided	Uncertain significance(Last reviewed: Jun 24, 2013)	criteria provided, single submitter	VCV000191474	17	68172064	17	70175923	191474	189367	rs201162707	NC_000017.11:70175922:T:C
NM_000891.3(KCNJ2):c.973C>T (p.Arg325Cys)	KCNJ2	R325C	Ventricular fibrillation|Andersen Tawil syndrome|Short QT syndrome 3|Andersen Tawil syndrome|not provided	Uncertain significance(Last reviewed: Sep 18, 2019)	criteria provided, multiple submitters, no conflicts	VCV000190821	17	68172153	17	70176012	190821	188662	rs202067116	NC_000017.11:70176011:C:T
NM_000891.3(KCNJ2):c.935G>A (p.Arg312His)	KCNJ2	R312H	Andersen Tawil syndrome|Short QT syndrome 3|not provided	Conflicting interpretations of pathogenicity(Last reviewed: Dec 28, 2017)	criteria provided, conflicting interpretations	VCV000190820	17	68172115	17	70175974	190820	188661	rs786205820	NC_000017.11:70175973:G:A
NM_000891.3(KCNJ2):c.1244C>T (p.Pro415Leu)	KCNJ2	P415L	not provided|Short QT syndrome 3|Andersen Tawil syndrome	Uncertain significance(Last reviewed: Nov 1, 2021)	criteria provided, multiple submitters, no conflicts	VCV000190819	17	68172424	17	70176283	190819	188667	rs373799322	NC_000017.11:70176282:C:T
NM_000891.3(KCNJ2):c.1045G>A (p.Glu349Lys)	KCNJ2	E349K	not provided|Short QT syndrome 3|Andersen Tawil syndrome	Uncertain significance(Last reviewed: Aug 25, 2020)	criteria provided, multiple submitters, no conflicts	VCV000190818	17	68172225	17	70176084	190818	188664	rs375330016	NC_000017.11:70176083:G:A
NM_000891.3(KCNJ2):c.976T>A (p.Tyr326Asn)	KCNJ2	Y326N	not provided	Uncertain significance(Last reviewed: Mar 22, 2012)	criteria provided, single submitter	VCV000190817	17	68172156	17	70176015	190817	188663	rs786205819	NC_000017.11:70176014:T:A
NM_000891.3(KCNJ2):c.901A>G (p.Met301Val)	KCNJ2	M301V	not provided|Andersen Tawil syndrome|Short QT syndrome 3	Conflicting interpretations of pathogenicity(Last reviewed: Dec 13, 2019)	criteria provided, conflicting interpretations	VCV000190816	17	68172081	17	70175940	190816	188659	rs786205818	NC_000017.11:70175939:A:G
NM_000891.3(KCNJ2):c.896A>T (p.Glu299Val)	KCNJ2	E299V	not provided	Likely pathogenic(Last reviewed: Dec 7, 2016)	criteria provided, single submitter	VCV000190815	17	68172076	17	70175935	190815	188658	rs786205817	NC_000017.11:70175934:A:T
NM_000891.3(KCNJ2):c.821A>T (p.Asp274Val)	KCNJ2	D274V	not provided	Uncertain significance(Last reviewed: Nov 24, 2017)	criteria provided, single submitter	VCV000190814	17	68172001	17	70175860	190814	188657	rs786205816	NC_000017.11:70175859:A:T
NM_000891.3(KCNJ2):c.653G>T (p.Arg218Leu)	KCNJ2	R218L	not provided|Andersen Tawil syndrome|Short QT syndrome 3	Conflicting interpretations of pathogenicity(Last reviewed: Apr 29, 2021)	criteria provided, conflicting interpretations	VCV000190813	17	68171833	17	70175692	190813	188656	rs199473384	NC_000017.11:70175691:G:T
NM_000891.3(KCNJ2):c.566G>A (p.Arg189Lys)	KCNJ2	R189K	not provided	Likely pathogenic(Last reviewed: Mar 21, 2013)	criteria provided, single submitter	VCV000190812	17	68171746	17	70175605	190812	188655	rs199473381	NC_000017.11:70175604:G:A
NM_000891.3(KCNJ2):c.328C>T (p.His110Tyr)	KCNJ2	H110Y	not provided	Uncertain significance(Last reviewed: Jul 29, 2013)	criteria provided, single submitter	VCV000190811	17	68171508	17	70175367	190811	188653	rs786205815	NC_000017.11:70175366:C:T
NM_000891.3(KCNJ2):c.256G>T (p.Val86Phe)	KCNJ2	V86F	not provided	Uncertain significance(Last reviewed: Jan 31, 2013)	criteria provided, single submitter	VCV000190810	17	68171436	17	70175295	190810	188652	rs786205814	NC_000017.11:70175294:G:T
NM_000891.3(KCNJ2):c.236T>C (p.Ile79Thr)	KCNJ2	I79T	not provided	Conflicting interpretations of pathogenicity(Last reviewed: Mar 15, 2022)	criteria provided, conflicting interpretations	VCV000190809	17	68171416	17	70175275	190809	188651	rs786205813	NC_000017.11:70175274:T:C
NM_000891.3(KCNJ2):c.226T>G (p.Cys76Gly)	KCNJ2	C76G	Andersen Tawil syndrome|Short QT syndrome 3|not provided	Conflicting interpretations of pathogenicity(Last reviewed: Jan 4, 2017)	criteria provided, conflicting interpretations	VCV000190808	17	68171406	17	70175265	190808	188650	rs786205812	NC_000017.11:70175264:T:G
NM_000891.3(KCNJ2):c.208G>A (p.Ala70Thr)	KCNJ2	A70T	not specified	Uncertain significance(Last reviewed: Jul 30, 2012)	criteria provided, single submitter	VCV000190807	17	68171388	17	70175247	190807	188649	rs375605948	NC_000017.11:70175246:G:A
NM_000891.3(KCNJ2):c.2T>C (p.Met1Thr)	KCNJ2	M1T	not provided	Uncertain significance(Last reviewed: May 11, 2015)	criteria provided, single submitter	VCV000190805	17	68171182	17	70175041	190805	188647	rs786205810	NC_000017.11:70175040:T:C
NM_000891.3(KCNJ2):c.1229A>G (p.Asn410Ser)	KCNJ2	N410S	Cardiovascular phenotype|not specified|not provided|Andersen Tawil syndrome|Short QT syndrome 3|Atrial fibrillation, familial, 9|Andersen Tawil syndrome|Short QT syndrome 3	Conflicting interpretations of pathogenicity(Last reviewed: Nov 11, 2020)	criteria provided, conflicting interpretations	VCV000190804	17	68172409	17	70176268	190804	188666	rs141069645	NC_000017.11:70176267:A:G
NM_000891.3(KCNJ2):c.1199C>T (p.Thr400Met)	KCNJ2	T400M	not provided|Cardiovascular phenotype|Long QT syndrome	Uncertain significance(Last reviewed: Sep 23, 2019)	criteria provided, multiple submitters, no conflicts	VCV000161258	17	68172379	17	70176238	161258	171190	rs144022753	NC_000017.11:70176237:C:T
NM_000891.3(KCNJ2):c.953A>G (p.Asn318Ser)	KCNJ2		Andersen Tawil syndrome|Short QT syndrome 3|Andersen Tawil syndrome	Uncertain significance(Last reviewed: Jan 31, 2020)	criteria provided, multiple submitters, no conflicts	VCV000161257	17	68172133	17	70175992	161257	171189	rs367560052	NC_000017.11:70175991:A:G
NM_000891.3(KCNJ2):c.773T>C (p.Ile258Thr)	KCNJ2	I258T	not specified	Benign(Last reviewed: Oct 16, 2012)	criteria provided, single submitter	VCV000137985	17	68171953	17	70175812	137985	141688	rs587781007	NC_000017.11:70175811:T:C
NM_000891.3(KCNJ2):c.934C>T (p.Arg312Cys)	KCNJ2	R312C	not provided|Andersen Tawil syndrome|Short QT syndrome 3|Congenital long QT syndrome	Likely pathogenic(Last reviewed: Sep 9, 2020)	criteria provided, multiple submitters, no conflicts	VCV000067594	17	68172114	17	70175973	67594	78490	rs199473389	NC_000017.11:70175972:C:T
NM_000891.3(KCNJ2):c.926C>T (p.Thr309Ile)	KCNJ2	T309I	Congenital long QT syndrome	not provided	no assertion provided	VCV000067593	17	68172106	17	70175965	67593	78489	rs199473388	NC_000017.11:70175964:C:T
NM_000891.3(KCNJ2):c.921G>A (p.Met307Ile)	KCNJ2	M307I	Congenital long QT syndrome	not provided	no assertion provided	VCV000067592	17	68172101	17	70175960	67592	78488	rs199473658	NC_000017.11:70175959:G:A
NM_000891.3(KCNJ2):c.913A>G (p.Thr305Ala)	KCNJ2	T305A	Andersen Tawil syndrome|Andersen Tawil syndrome|Short QT syndrome 3|Cardiac arrhythmia	Likely pathogenic(Last reviewed: Feb 3, 2019)	criteria provided, single submitter	VCV000067591	17	68172093	17	70175952	67591	78487	rs199473387	NC_000017.11:70175951:A:G
NM_000891.3(KCNJ2):c.907G>A (p.Glu303Lys)	KCNJ2	E303K	Congenital long QT syndrome	not provided	no assertion provided	VCV000067590	17	68172087	17	70175946	67590	78486	rs199473386	NC_000017.11:70175945:G:A
NM_000891.3(KCNJ2):c.899G>C (p.Gly300Ala)	KCNJ2	G300A	Congenital long QT syndrome	not provided	no assertion provided	VCV000067589	17	68172079	17	70175938	67589	78485	rs104894579	NC_000017.11:70175937:G:C
NM_000891.3(KCNJ2):c.899G>A (p.Gly300Asp)	KCNJ2		Andersen Tawil syndrome|not provided|Congenital long QT syndrome	Pathogenic(Last reviewed: Oct 23, 2020)	criteria provided, single submitter	VCV000067588	17	68172079	17	70175938	67588	78484	rs104894579	NC_000017.11:70175937:G:A
NM_000891.3(KCNJ2):c.779G>C (p.Arg260Pro)	KCNJ2	R260P	not provided|Congenital long QT syndrome	Pathogenic(Last reviewed: Jul 28, 2014)	criteria provided, single submitter	VCV000067587	17	68171959	17	70175818	67587	78483	rs199473385	NC_000017.11:70175817:G:C
NM_000891.3(KCNJ2):c.679G>T (p.Val227Phe)	KCNJ2	V227F	Ventricular tachycardia	not provided	no assertion provided	VCV000067586	17	68171859	17	70175718	67586	78482	rs199473657	NC_000017.11:70175717:G:T
NM_000891.3(KCNJ2):c.653G>A (p.Arg218Gln)	KCNJ2	R218Q	not provided|Andersen Tawil syndrome|Andersen Tawil syndrome|Short QT syndrome 3|Congenital long QT syndrome	Pathogenic(Last reviewed: Jul 31, 2020)	criteria provided, multiple submitters, no conflicts	VCV000067585	17	68171833	17	70175692	67585	78481	rs199473384	NC_000017.11:70175691:G:A
NM_000891.3(KCNJ2):c.650T>C (p.Leu217Pro)	KCNJ2	L217P	Congenital long QT syndrome	not provided	no assertion provided	VCV000067584	17	68171830	17	70175689	67584	78480	rs199473656	NC_000017.11:70175688:T:C
NM_000891.3(KCNJ2):c.644G>A (p.Gly215Asp)	KCNJ2	G215D	Andersen Tawil syndrome|Short QT syndrome 3|Andersen Tawil syndrome|Congenital long QT syndrome	Pathogenic(Last reviewed: Feb 12, 2020)	criteria provided, single submitter	VCV000067583	17	68171824	17	70175683	67583	78479	rs199473383	NC_000017.11:70175682:G:A
NM_000891.3(KCNJ2):c.575C>T (p.Thr192Ile)	KCNJ2	T192I	Congenital long QT syndrome	not provided	no assertion provided	VCV000067582	17	68171755	17	70175614	67582	78478	rs199473655	NC_000017.11:70175613:C:T
NM_000891.3(KCNJ2):c.574A>G (p.Thr192Ala)	KCNJ2	T192A	Andersen Tawil syndrome|Congenital long QT syndrome	Pathogenic(Last reviewed: Aug 28, 2020)	criteria provided, single submitter	VCV000067581	17	68171754	17	70175613	67581	78477	rs199473382	NC_000017.11:70175612:A:G
NM_000891.3(KCNJ2):c.566G>T (p.Arg189Ile)	KCNJ2	R189I	not provided|Congenital long QT syndrome	Likely pathogenic(Last reviewed: Feb 24, 2017)	criteria provided, single submitter	VCV000067580	17	68171746	17	70175605	67580	78476	rs199473381	NC_000017.11:70175604:G:T
NM_000891.3(KCNJ2):c.461G>T (p.Cys154Phe)	KCNJ2	C154F	Congenital long QT syndrome	not provided	no assertion provided	VCV000067579	17	68171641	17	70175500	67579	78475	rs199473380	NC_000017.11:70175499:G:T
NM_000891.3(KCNJ2):c.437G>C (p.Gly146Ala)	KCNJ2	G146A	Congenital long QT syndrome	not provided	no assertion provided	VCV000067578	17	68171617	17	70175476	67578	78474	rs199473379	NC_000017.11:70175475:G:C
NM_000891.3(KCNJ2):c.437G>A (p.Gly146Asp)	KCNJ2	G146D	Andersen Tawil syndrome|Short QT syndrome 3|Congenital long QT syndrome	Uncertain significance(Last reviewed: May 14, 2020)	criteria provided, single submitter	VCV000067577	17	68171617	17	70175476	67577	78473	rs199473379	NC_000017.11:70175475:G:A
NM_000891.3(KCNJ2):c.436G>A (p.Gly146Ser)	KCNJ2	G146S	Congenital long QT syndrome	not provided	no assertion provided	VCV000067576	17	68171616	17	70175475	67576	78472	rs199473654	NC_000017.11:70175474:G:A
NM_000891.3(KCNJ2):c.431G>C (p.Gly144Ala)	KCNJ2	G144A	Andersen Tawil syndrome|Short QT syndrome 3|Congenital long QT syndrome	Pathogenic(Last reviewed: Dec 8, 2019)	criteria provided, single submitter	VCV000067575	17	68171611	17	70175470	67575	78471	rs199473377	NC_000017.11:70175469:G:C
NM_000891.3(KCNJ2):c.431G>A (p.Gly144Asp)	KCNJ2	G144D	not provided|Andersen Tawil syndrome|Short QT syndrome 3|Atrial fibrillation, familial, 9|Andersen Tawil syndrome|Short QT syndrome 3|Congenital long QT syndrome|Atrial fibrillation, familial, 1|Andersen Tawil syndrome|Short QT syndrome 1	Pathogenic(Last reviewed: Apr 20, 2021)	criteria provided, multiple submitters, no conflicts	VCV000067574	17	68171611	17	70175470	67574	78470	rs199473377	NC_000017.11:70175469:G:A
NM_000891.3(KCNJ2):c.430G>A (p.Gly144Ser)	KCNJ2	G144S	Andersen Tawil syndrome|Short QT syndrome 3|Congenital long QT syndrome	Pathogenic(Last reviewed: Feb 6, 2020)	criteria provided, single submitter	VCV000067573	17	68171610	17	70175469	67573	78469	rs199473378	NC_000017.11:70175468:G:A
NM_000891.3(KCNJ2):c.407C>T (p.Ser136Phe)	KCNJ2	S136F	Congenital long QT syndrome	not provided	no assertion provided	VCV000067572	17	68171587	17	70175446	67572	78468	rs199473376	NC_000017.11:70175445:C:T
NM_000891.3(KCNJ2):c.368T>G (p.Val123Gly)	KCNJ2	V123G	Congenital long QT syndrome	not provided	no assertion provided	VCV000067571	17	68171548	17	70175407	67571	78467	rs199473375	NC_000017.11:70175406:T:G
NM_000891.3(KCNJ2):c.301T>C (p.Cys101Arg)	KCNJ2	C101R	Ventricular tachycardia	not provided	no assertion provided	VCV000067570	17	68171481	17	70175340	67570	78466	rs199473374	NC_000017.11:70175339:T:C
NM_000891.3(KCNJ2):c.245G>A (p.Arg82Gln)	KCNJ2	R82Q	not provided|Andersen Tawil syndrome|Short QT syndrome 3|Andersen Tawil syndrome|Cardiovascular phenotype|Congenital long QT syndrome	Pathogenic/Likely pathogenic(Last reviewed: Oct 1, 2021)	criteria provided, multiple submitters, no conflicts	VCV000067569	17	68171425	17	70175284	67569	78465	rs199473653	NC_000017.11:70175283:G:A
NM_000891.3(KCNJ2):c.244C>T (p.Arg82Trp)	KCNJ2	R82W	Ventricular tachycardia|not provided|Supraventricular tachycardia|Andersen Tawil syndrome|Short QT syndrome 3|Andersen Tawil syndrome	Pathogenic(Last reviewed: Aug 14, 2020)	criteria provided, multiple submitters, no conflicts	VCV000067568	17	68171424	17	70175283	67568	78464	rs199473373	NC_000017.11:70175282:C:T
NM_000891.3(KCNJ2):c.233A>G (p.Asp78Gly)	KCNJ2	D78G	Andersen Tawil syndrome|Congenital long QT syndrome	Pathogenic(Last reviewed: Apr 17, 2014)	no assertion criteria provided	VCV000067567	17	68171413	17	70175272	67567	78463	rs199473371	NC_000017.11:70175271:A:G
NM_000891.3(KCNJ2):c.232G>T (p.Asp78Tyr)	KCNJ2	D78Y	Andersen Tawil syndrome|Short QT syndrome 3|Congenital long QT syndrome	Pathogenic(Last reviewed: Nov 6, 2019)	criteria provided, single submitter	VCV000067566	17	68171412	17	70175271	67566	78462	rs199473372	NC_000017.11:70175270:G:T
NM_000891.3(KCNJ2):c.224C>T (p.Thr75Met)	KCNJ2	T75M	not provided|Andersen Tawil syndrome|Short QT syndrome 3|Congenital long QT syndrome	Pathogenic(Last reviewed: Jul 21, 2020)	criteria provided, multiple submitters, no conflicts	VCV000067565	17	68171404	17	70175263	67565	78461	rs104894585	NC_000017.11:70175262:C:T
NM_000891.3(KCNJ2):c.223A>G (p.Thr75Ala)	KCNJ2	T75A	Congenital long QT syndrome	not provided	no assertion provided	VCV000067564	17	68171403	17	70175262	67564	78460	rs199473370	NC_000017.11:70175261:A:G
NM_000891.3(KCNJ2):c.220A>G (p.Thr74Ala)	KCNJ2	T74A	Congenital long QT syndrome	not provided	no assertion provided	VCV000067563	17	68171400	17	70175259	67563	78459	rs199473652	NC_000017.11:70175258:A:G
NM_000891.3(KCNJ2):c.211G>A (p.Asp71Asn)	KCNJ2	D71N	not provided|Congenital long QT syndrome	Likely pathogenic(Last reviewed: Apr 21, 2016)	criteria provided, single submitter	VCV000067562	17	68171391	17	70175250	67562	78458	rs199473369	NC_000017.11:70175249:G:A
NM_000891.3(KCNJ2):c.202T>G (p.Tyr68Asp)	KCNJ2	Y68D	Congenital long QT syndrome	not provided	no assertion provided	VCV000067561	17	68171382	17	70175241	67561	78457	rs199473651	NC_000017.11:70175240:T:G
NM_000891.3(KCNJ2):c.200G>A (p.Arg67Gln)	KCNJ2	R67Q	Andersen Tawil syndrome|Short QT syndrome 3|not specified|not provided|Congenital long QT syndrome	Pathogenic/Likely pathogenic(Last reviewed: May 22, 2019)	criteria provided, multiple submitters, no conflicts	VCV000067560	17	68171380	17	70175239	67560	78456	rs199473368	NC_000017.11:70175238:G:A
NM_000891.3(KCNJ2):c.1265G>T (p.Arg422Leu)	KCNJ2	R422L	Congenital long QT syndrome	not provided	no assertion provided	VCV000067559	17	68172445	17	70176304	67559	78455	rs199473390	NC_000017.11:70176303:G:T
NM_000891.3(KCNJ2):c.1051C>T (p.Pro351Ser)	KCNJ2	P351S	Congenital long QT syndrome	not provided	no assertion provided	VCV000067558	17	68172231	17	70176090	67558	78454	rs199473659	NC_000017.11:70176089:C:T
NM_000891.3(KCNJ2):c.277G>A (p.Val93Ile)	KCNJ2	V93I	Atrial fibrillation|Short QT syndrome 3|Andersen Tawil syndrome|not provided|Atrial fibrillation, familial, 9|Andersen Tawil syndrome|Short QT syndrome 3	Conflicting interpretations of pathogenicity(Last reviewed: Dec 17, 2021)	criteria provided, conflicting interpretations	VCV000030121	17	68171457	17	70175316	30121	39077	rs147750704	NC_000017.11:70175315:G:A
NM_000891.3(KCNJ2):c.913A>C (p.Thr305Pro)	KCNJ2	T305P	Andersen Tawil syndrome|Congenital long QT syndrome	Pathogenic(Last reviewed: Apr 15, 2007)	no assertion criteria provided	VCV000030120	17	68172093	17	70175952	30120	39076	rs199473387	NC_000017.11:70175951:A:C
NM_000891.3(KCNJ2):c.161G>T (p.Cys54Phe)	KCNJ2	C54F	Andersen Tawil syndrome|Familial periodic paralysis	Pathogenic(Last reviewed: Apr 15, 2007)	no assertion criteria provided	VCV000030119	17	68171341	17	70175200	30119	39075	rs199473650	NC_000017.11:70175199:G:T
NM_000891.3(KCNJ2):c.224C>G (p.Thr75Arg)	KCNJ2	T75R	Andersen Tawil syndrome|Congenital long QT syndrome	Pathogenic(Last reviewed: Aug 1, 2006)	no assertion criteria provided	VCV000008928	17	68171404	17	70175263	8928	23967	rs104894585	NC_000017.11:70175262:C:G
NM_000891.3(KCNJ2):c.514G>A (p.Asp172Asn)	KCNJ2	D172N	short QT syndrome|Short QT syndrome 3|Andersen Tawil syndrome|Short QT syndrome 3	Pathogenic(Last reviewed: Jun 22, 2015)	criteria provided, single submitter	VCV000008927	17	68171694	17	70175553	8927	23966	rs104894584	NC_000017.11:70175552:G:A
NM_000891.3(KCNJ2):c.646A>C (p.Asn216His)	KCNJ2	N216H	Andersen Tawil syndrome|Congenital long QT syndrome	Pathogenic(Last reviewed: Aug 1, 2002)	no assertion criteria provided	VCV000008926	17	68171826	17	70175685	8926	23965	rs104894583	NC_000017.11:70175684:A:C
NM_000891.3(KCNJ2):c.904G>A (p.Val302Met)	KCNJ2	V302M	Andersen Tawil syndrome|Congenital long QT syndrome	Pathogenic(Last reviewed: Aug 1, 2002)	no assertion criteria provided	VCV000008925	17	68172084	17	70175943	8925	23964	rs104894582	NC_000017.11:70175942:G:A
NM_000891.3(KCNJ2):c.557C>T (p.Pro186Leu)	KCNJ2	P186L	Andersen Tawil syndrome|Congenital long QT syndrome	Pathogenic(Last reviewed: Aug 1, 2002)	no assertion criteria provided	VCV000008924	17	68171737	17	70175596	8924	23963	rs104894581	NC_000017.11:70175595:C:T
NM_000891.3(KCNJ2):c.199C>T (p.Arg67Trp)	KCNJ2		Short QT syndrome 3|Andersen Tawil syndrome|Atrial fibrillation, familial, 9|not specified|Congenital long QT syndrome|Short QT syndrome 3|Andersen Tawil syndrome|not provided|Andersen Tawil syndrome	Pathogenic(Last reviewed: Dec 17, 2021)	criteria provided, multiple submitters, no conflicts	VCV000008923	17	68171379	17	70175238	8923	23962	rs104894580	NC_000017.11:70175237:C:T
NM_000891.3(KCNJ2):c.899G>T (p.Gly300Val)	KCNJ2	G300V	not provided|Andersen Tawil syndrome|Congenital long QT syndrome	Pathogenic(Last reviewed: Nov 26, 2018)	criteria provided, single submitter	VCV000008920	17	68172079	17	70175938	8920	23959	rs104894579	NC_000017.11:70175937:G:T
NM_000891.3(KCNJ2):c.652C>T (p.Arg218Trp)	KCNJ2		Congenital long QT syndrome|Short QT syndrome 3|Andersen Tawil syndrome|not provided|Andersen Tawil syndrome	Pathogenic(Last reviewed: Oct 23, 2020)	criteria provided, multiple submitters, no conflicts	VCV000008919	17	68171832	17	70175691	8919	23958	rs104894578	NC_000017.11:70175690:C:T
NM_000891.3(KCNJ2):c.212A>T (p.Asp71Val)	KCNJ2	D71V	Andersen Tawil syndrome|Congenital long QT syndrome	Pathogenic(Last reviewed: May 18, 2001)	no assertion criteria provided	VCV000008918	17	68171392	17	70175251	8918	23957	rs104894575	NC_000017.11:70175250:A:T
NM_152868.3(KCNJ4):c.586C>T (p.Arg196Cys)	KCNJ4	R196C	Malignant tumor of prostate	Uncertain significance	no assertion criteria provided	VCV000161819	22	38823552	22	38427547	161819	171675	rs193920820	NC_000022.11:38427546:G:A
NM_000890.5(KCNJ5):c.955C>T (p.Arg319Trp)	KCNJ5	R319W	not provided	Uncertain significance(Last reviewed: May 24, 2021)	criteria provided, single submitter	VCV001326808	11	128786321	11	128916426	1326808	1317167		NC_000011.10:128916425:C:T
NM_000890.5(KCNJ5):c.160A>C (p.Met54Leu)	KCNJ5	M54L	not provided	Uncertain significance(Last reviewed: May 20, 2021)	criteria provided, single submitter	VCV001325992	11	128781328	11	128911433	1325992	1316252		NC_000011.10:128911432:A:C
NM_000890.5(KCNJ5):c.854C>G (p.Pro285Arg)	KCNJ5	P285R	not provided	Uncertain significance(Last reviewed: Oct 15, 2019)	criteria provided, single submitter	VCV001309427	11	128782022	11	128912127	1309427	1300126		NC_000011.10:128912126:C:G
NM_000890.5(KCNJ5):c.1151C>T (p.Pro384Leu)	KCNJ5	P384L	not provided	Uncertain significance(Last reviewed: Jun 5, 2019)	criteria provided, single submitter	VCV001306167	11	128786517	11	128916622	1306167	1297437		NC_000011.10:128916621:C:T
NM_000890.5(KCNJ5):c.704G>A (p.Arg235Gln)	KCNJ5	R235Q	not provided	Uncertain significance(Last reviewed: May 23, 2019)	criteria provided, single submitter	VCV001306130	11	128781872	11	128911977	1306130	1297401		NC_000011.10:128911976:G:A
NM_000890.5(KCNJ5):c.766G>A (p.Asp256Asn)	KCNJ5	D256N	not provided	Uncertain significance(Last reviewed: Mar 26, 2020)	criteria provided, single submitter	VCV001302912	11	128781934	11	128912039	1302912	1293192		NC_000011.10:128912038:G:A
NM_000890.5(KCNJ5):c.506T>C (p.Leu169Ser)	KCNJ5	L169S	not provided	Uncertain significance(Last reviewed: Feb 3, 2020)	criteria provided, single submitter	VCV001194816	11	128781674	11	128911779	1194816	1184488		NC_000011.10:128911778:T:C
NM_000890.5(KCNJ5):c.1123C>T (p.Arg375Trp)	KCNJ5	R375W	not provided|Long QT syndrome	Uncertain significance(Last reviewed: Aug 31, 2021)	criteria provided, multiple submitters, no conflicts	VCV001060449	11	128786489	11	128916594	1060449	1047112		NC_000011.10:128916593:C:T
NM_000890.5(KCNJ5):c.631C>T (p.Arg211Trp)	KCNJ5	R211W	Long QT syndrome	Uncertain significance(Last reviewed: Aug 29, 2020)	criteria provided, single submitter	VCV001058806	11	128781799	11	128911904	1058806	1047110		NC_000011.10:128911903:C:T
NM_000890.5(KCNJ5):c.1248G>C (p.Arg416Ser)	KCNJ5	R416S	not provided	Uncertain significance	no assertion criteria provided	VCV001050347	11	128786614	11	128916719	1050347	1038045		NC_000011.10:128916718:G:C
NM_000890.5(KCNJ5):c.532G>A (p.Val178Ile)	KCNJ5	V178I	Long QT syndrome	Uncertain significance(Last reviewed: Mar 12, 2020)	criteria provided, single submitter	VCV001045677	11	128781700	11	128911805	1045677	1030130	rs771161358	NC_000011.10:128911804:G:A
NM_000890.5(KCNJ5):c.274G>A (p.Val92Ile)	KCNJ5	V92I	Long QT syndrome	Uncertain significance(Last reviewed: Jun 26, 2020)	criteria provided, single submitter	VCV001040985	11	128781442	11	128911547	1040985	1030129	rs749202931	NC_000011.10:128911546:G:A
NM_000890.5(KCNJ5):c.902T>A (p.Val301Asp)	KCNJ5	V301D	Long QT syndrome	Uncertain significance(Last reviewed: Feb 18, 2020)	criteria provided, single submitter	VCV001019977	11	128782070	11	128912175	1019977	1009578	rs1462481036	NC_000011.10:128912174:T:A
NM_000890.5(KCNJ5):c.148C>T (p.Arg50Cys)	KCNJ5	R50C	Long QT syndrome	Uncertain significance(Last reviewed: Jul 15, 2020)	criteria provided, single submitter	VCV001014195	11	128781316	11	128911421	1014195	1009577	rs781011854	NC_000011.10:128911420:C:T
NM_000890.5(KCNJ5):c.520C>A (p.Leu174Met)	KCNJ5	L174M	Long QT syndrome	Uncertain significance(Last reviewed: Mar 19, 2020)	criteria provided, single submitter	VCV001011142	11	128781688	11	128911793	1011142	994394	rs1944506012	NC_000011.10:128911792:C:A
NM_000890.5(KCNJ5):c.133G>C (p.Glu45Gln)	KCNJ5	E45Q	Long QT syndrome	Uncertain significance(Last reviewed: Feb 19, 2020)	criteria provided, single submitter	VCV001011128	11	128781301	11	128911406	1011128	994390	rs372447456	NC_000011.10:128911405:G:C
NM_000890.5(KCNJ5):c.119C>T (p.Thr40Met)	KCNJ5	T40M	Long QT syndrome	Uncertain significance(Last reviewed: Mar 22, 2020)	criteria provided, single submitter	VCV001010966	11	128781287	11	128911392	1010966	994389	rs185412918	NC_000011.10:128911391:C:T
NM_000890.5(KCNJ5):c.415G>A (p.Ala139Thr)	KCNJ5	A139T	Long QT syndrome	Uncertain significance(Last reviewed: Oct 5, 2020)	criteria provided, single submitter	VCV001008840	11	128781583	11	128911688	1008840	994393	rs201816501	NC_000011.10:128911687:G:A
NM_000890.5(KCNJ5):c.53C>T (p.Thr18Ile)	KCNJ5	T18I	Long QT syndrome	Uncertain significance(Last reviewed: Oct 21, 2020)	criteria provided, single submitter	VCV001008531	11	128781221	11	128911326	1008531	994388	rs375669366	NC_000011.10:128911325:C:T
NM_000890.5(KCNJ5):c.155G>A (p.Arg52His)	KCNJ5	R52H	Long QT syndrome	Uncertain significance(Last reviewed: Jan 24, 2020)	criteria provided, single submitter	VCV001007137	11	128781323	11	128911428	1007137	994391	rs144062083	NC_000011.10:128911427:G:A
NM_000890.5(KCNJ5):c.295G>A (p.Val99Ile)	KCNJ5	V99I	Long QT syndrome	Uncertain significance(Last reviewed: Mar 6, 2020)	criteria provided, single submitter	VCV001001977	11	128781463	11	128911568	1001977	994392	rs1390685442	NC_000011.10:128911567:G:A
NM_000890.5(KCNJ5):c.748A>T (p.Ile250Phe)	KCNJ5	I250F	Long QT syndrome|not provided	Uncertain significance(Last reviewed: Oct 30, 2019)	criteria provided, multiple submitters, no conflicts	VCV000963164	11	128781916	11	128912021	963164	947357	rs769317544	NC_000011.10:128912020:A:T
NM_000890.5(KCNJ5):c.1210G>C (p.Asp404His)	KCNJ5	D404H	Long QT syndrome	Uncertain significance(Last reviewed: Aug 30, 2019)	criteria provided, single submitter	VCV000959751	11	128786576	11	128916681	959751	947358	rs1265998559	NC_000011.10:128916680:G:C
NM_000890.5(KCNJ5):c.724C>T (p.Arg242Trp)	KCNJ5	R242W	Long QT syndrome	Uncertain significance(Last reviewed: Aug 22, 2020)	criteria provided, single submitter	VCV000947956	11	128781892	11	128911997	947956	926154	rs576156828	NC_000011.10:128911996:C:T
NM_000890.5(KCNJ5):c.449T>C (p.Ile150Thr)	KCNJ5	I150T	Long QT syndrome	Uncertain significance(Last reviewed: Feb 11, 2020)	criteria provided, single submitter	VCV000946292	11	128781617	11	128911722	946292	926153	rs1232257803	NC_000011.10:128911721:T:C
NM_000890.5(KCNJ5):c.214C>T (p.Arg72Trp)	KCNJ5	R72W	Long QT syndrome	Uncertain significance(Last reviewed: Jul 6, 2019)	criteria provided, single submitter	VCV000941579	11	128781382	11	128911487	941579	935434	rs757877367	NC_000011.10:128911486:C:T
NM_000890.5(KCNJ5):c.316T>C (p.Phe106Leu)	KCNJ5	F106L	Long QT syndrome	Uncertain significance(Last reviewed: Jun 9, 2019)	criteria provided, single submitter	VCV000941414	11	128781484	11	128911589	941414	935435	rs1944499851	NC_000011.10:128911588:T:C
NM_000890.5(KCNJ5):c.956G>A (p.Arg319Gln)	KCNJ5	R319Q	Familial hyperaldosteronism type 3	Uncertain significance(Last reviewed: Jan 12, 2018)	criteria provided, single submitter	VCV000878287	11	128786322	11	128916427	878287	867574	rs1418258797	NC_000011.10:128916426:G:A
NM_000890.5(KCNJ5):c.476A>G (p.Glu159Gly)	KCNJ5	E159G	Familial hyperaldosteronism type 3	Uncertain significance(Last reviewed: Apr 27, 2017)	criteria provided, single submitter	VCV000877246	11	128781644	11	128911749	877246	867573	rs753651100	NC_000011.10:128911748:A:G
NM_000890.5(KCNJ5):c.455A>G (p.Tyr152Cys)	KCNJ5	Y152C	Familial hyperaldosteronism type 3	Uncertain significance(Last reviewed: Apr 27, 2017)	criteria provided, single submitter	VCV000877245	11	128781623	11	128911728	877245	867572	rs1944503932	NC_000011.10:128911727:A:G
NM_000890.5(KCNJ5):c.1151C>G (p.Pro384Arg)	KCNJ5	P384R	Long QT syndrome|Long QT syndrome 13	Uncertain significance(Last reviewed: Oct 20, 2020)	criteria provided, multiple submitters, no conflicts	VCV000869438	11	128786517	11	128916622	869438	857650	rs148307402	NC_000011.10:128916621:C:G
NM_000890.5(KCNJ5):c.184G>A (p.Val62Met)	KCNJ5	V62M	Long QT syndrome	Uncertain significance(Last reviewed: Dec 13, 2019)	criteria provided, single submitter	VCV000864385	11	128781352	11	128911457	864385	838117	rs1389808024	NC_000011.10:128911456:G:A
NM_000890.5(KCNJ5):c.687C>G (p.Ile229Met)	KCNJ5	I229M	Long QT syndrome	Uncertain significance(Last reviewed: Apr 20, 2019)	criteria provided, single submitter	VCV000854094	11	128781855	11	128911960	854094	838119	rs149327599	NC_000011.10:128911959:C:G
NM_000890.5(KCNJ5):c.1220A>G (p.Lys407Arg)	KCNJ5	K407R	Long QT syndrome	Uncertain significance(Last reviewed: Mar 13, 2019)	criteria provided, single submitter	VCV000843194	11	128786586	11	128916691	843194	838121	rs745968243	NC_000011.10:128916690:A:G
NM_000890.5(KCNJ5):c.725G>A (p.Arg242Gln)	KCNJ5	R242Q	Long QT syndrome	Uncertain significance(Last reviewed: Nov 19, 2019)	criteria provided, single submitter	VCV000836272	11	128781893	11	128911998	836272	838120	rs746240972	NC_000011.10:128911997:G:A
NM_000890.5(KCNJ5):c.1133A>C (p.Gln378Pro)	KCNJ5	Q378P	not provided	Benign(Last reviewed: Jun 13, 2018)	criteria provided, single submitter	VCV000701134	11	128786499	11	128916604	701134	687722	rs544093099	NC_000011.10:128916603:A:C
NM_000890.5(KCNJ5):c.260G>A (p.Arg87His)	KCNJ5	R87H	Long QT syndrome	Uncertain significance(Last reviewed: Dec 13, 2019)	criteria provided, single submitter	VCV000659892	11	128781428	11	128911533	659892	639819	rs747951700	NC_000011.10:128911532:G:A
NM_000890.5(KCNJ5):c.674G>A (p.Arg225His)	KCNJ5	R225H	Long QT syndrome	Uncertain significance(Last reviewed: Aug 1, 2018)	criteria provided, single submitter	VCV000651091	11	128781842	11	128911947	651091	639820	rs772877248	NC_000011.10:128911946:G:A
NM_000890.5(KCNJ5):c.1151C>A (p.Pro384Gln)	KCNJ5	P384Q	Long QT syndrome	Uncertain significance(Last reviewed: Jul 16, 2018)	criteria provided, single submitter	VCV000647018	11	128786517	11	128916622	647018	639822	rs148307402	NC_000011.10:128916621:C:A
NM_000890.5(KCNJ5):c.536A>G (p.Asn179Ser)	KCNJ5	N179S	Long QT syndrome	Uncertain significance(Last reviewed: Jul 16, 2018)	criteria provided, single submitter	VCV000581128	11	128781704	11	128911809	581128	564506	rs147070381	NC_000011.10:128911808:A:G
NM_000890.5(KCNJ5):c.554G>T (p.Cys185Phe)	KCNJ5	C185F	not provided|Long QT syndrome	Uncertain significance(Last reviewed: Dec 10, 2018)	criteria provided, multiple submitters, no conflicts	VCV000572313	11	128781722	11	128911827	572313	565563	rs760375676	NC_000011.10:128911826:G:T
NM_000890.5(KCNJ5):c.864G>T (p.Glu288Asp)	KCNJ5	E288D	Hypertrophic cardiomyopathy|Long QT syndrome 13	Conflicting interpretations of pathogenicity(Last reviewed: Feb 5, 2019)	criteria provided, conflicting interpretations	VCV000560690	11	128782032	11	128912137	560690	551781	rs771919907	NC_000011.10:128912136:G:T
NM_000890.5(KCNJ5):c.622A>G (p.Ile208Val)	KCNJ5	I208V	Long QT syndrome	Uncertain significance(Last reviewed: Dec 27, 2017)	criteria provided, single submitter	VCV000526948	11	128781790	11	128911895	526948	526133	rs1555145038	NC_000011.10:128911894:A:G
NM_000890.5(KCNJ5):c.1186G>A (p.Ala396Thr)	KCNJ5	A396T	Long QT syndrome	Uncertain significance(Last reviewed: Oct 31, 2016)	criteria provided, single submitter	VCV000520527	11	128786552	11	128916657	520527	511103	rs754816201	NC_000011.10:128916656:G:A
NM_000890.5(KCNJ5):c.659G>T (p.Arg220Leu)	KCNJ5	R220L	Cardiovascular phenotype	Uncertain significance(Last reviewed: May 17, 2017)	criteria provided, single submitter	VCV000518836	11	128781827	11	128911932	518836	510264	rs775915273	NC_000011.10:128911931:G:T
NM_000890.5(KCNJ5):c.41A>T (p.Glu14Val)	KCNJ5	E14V	Long QT syndrome	Uncertain significance(Last reviewed: Jun 30, 2017)	criteria provided, single submitter	VCV000457009	11	128781209	11	128911314	457009	460987	rs1555144849	NC_000011.10:128911313:A:T
NM_000890.5(KCNJ5):c.397C>T (p.Leu133Phe)	KCNJ5	L133F	Long QT syndrome	Uncertain significance(Last reviewed: May 30, 2017)	criteria provided, single submitter	VCV000457008	11	128781565	11	128911670	457008	461299	rs1555144961	NC_000011.10:128911669:C:T
NM_000890.5(KCNJ5):c.367G>A (p.Asp123Asn)	KCNJ5	D123N	Long QT syndrome	Uncertain significance(Last reviewed: Aug 7, 2017)	criteria provided, single submitter	VCV000457007	11	128781535	11	128911640	457007	460923	rs752310426	NC_000011.10:128911639:G:A
NM_000890.5(KCNJ5):c.122G>A (p.Arg41His)	KCNJ5	R41H	Long QT syndrome|not provided	Likely benign(Last reviewed: Jun 2, 2021)	criteria provided, multiple submitters, no conflicts	VCV000457005	11	128781290	11	128911395	457005	460993	rs139073333	NC_000011.10:128911394:G:A
NM_000890.5(KCNJ5):c.1190A>G (p.Glu397Gly)	KCNJ5	E397G	Long QT syndrome|not provided	Uncertain significance(Last reviewed: Mar 7, 2017)	criteria provided, single submitter	VCV000457004	11	128786556	11	128916661	457004	461301	rs780934792	NC_000011.10:128916660:A:G
NM_000890.5(KCNJ5):c.518T>G (p.Ile173Ser)	KCNJ5	I173S	not provided	Uncertain significance(Last reviewed: Jul 26, 2017)	criteria provided, single submitter	VCV000450793	11	128781686	11	128911791	450793	444752	rs1371805585	NC_000011.10:128911790:T:G
NM_000890.5(KCNJ5):c.439G>A (p.Glu147Lys)	KCNJ5	E147K	not provided|not specified|Long QT syndrome	Uncertain significance(Last reviewed: Jan 15, 2022)	criteria provided, multiple submitters, no conflicts	VCV000432222	11	128781607	11	128911712	432222	425913	rs148355179	NC_000011.10:128911711:G:A
NM_000890.5(KCNJ5):c.665G>A (p.Gly222Asp)	KCNJ5	G222D	not provided|Long QT syndrome	Uncertain significance(Last reviewed: Sep 25, 2020)	criteria provided, multiple submitters, no conflicts	VCV000429508	11	128781833	11	128911938	429508	421836	rs746522890	NC_000011.10:128911937:G:A
NM_000890.5(KCNJ5):c.616G>A (p.Ala206Thr)	KCNJ5	A206T	Hypertrophic cardiomyopathy	Uncertain significance(Last reviewed: Apr 30, 2017)	criteria provided, single submitter	VCV000427972	11	128781784	11	128911889	427972	419282	rs750424299	NC_000011.10:128911888:G:A
NM_000890.5(KCNJ5):c.1121G>T (p.Gly374Val)	KCNJ5	G374V	not provided	Uncertain significance(Last reviewed: Feb 15, 2017)	criteria provided, single submitter	VCV000423691	11	128786487	11	128916592	423691	408305	rs147680683	NC_000011.10:128916591:G:T
NM_000890.5(KCNJ5):c.1184A>C (p.Asp395Ala)	KCNJ5	D395A	Long QT syndrome	Uncertain significance(Last reviewed: Aug 25, 2016)	criteria provided, single submitter	VCV000404093	11	128786550	11	128916655	404093	398098	rs766058202	NC_000011.10:128916654:A:C
NM_000890.5(KCNJ5):c.630G>A (p.Met210Ile)	KCNJ5	M210I	not provided|Long QT syndrome	Likely benign(Last reviewed: Dec 31, 2019)	criteria provided, multiple submitters, no conflicts	VCV000404092	11	128781798	11	128911903	404092	398090	rs138295501	NC_000011.10:128911902:G:A
NM_000890.5(KCNJ5):c.866T>C (p.Met289Thr)	KCNJ5	M289T	Long QT syndrome	Uncertain significance(Last reviewed: Apr 28, 2018)	criteria provided, single submitter	VCV000404091	11	128782034	11	128912139	404091	398096	rs936797038	NC_000011.10:128912138:T:C
NM_000890.5(KCNJ5):c.968T>C (p.Met323Thr)	KCNJ5	M323T	Congenital long QT syndrome|Familial hyperaldosteronism type 3	Uncertain significance(Last reviewed: Jan 12, 2018)	criteria provided, single submitter	VCV000303632	11	128786334	11	128916439	303632	325549	rs886048011	NC_000011.10:128916438:T:C
NM_000890.5(KCNJ5):c.800G>A (p.Arg267His)	KCNJ5	R267H	Congenital long QT syndrome|Familial hyperaldosteronism type 3	Uncertain significance(Last reviewed: Jan 13, 2018)	criteria provided, single submitter	VCV000303631	11	128781968	11	128912073	303631	313299	rs886048010	NC_000011.10:128912072:G:A
NM_000890.5(KCNJ5):c.430A>G (p.Ile144Val)	KCNJ5	I144V	Congenital long QT syndrome|Long QT syndrome|Familial hyperaldosteronism type 3	Conflicting interpretations of pathogenicity(Last reviewed: Dec 4, 2019)	criteria provided, conflicting interpretations	VCV000303628	11	128781598	11	128911703	303628	319399	rs369703183	NC_000011.10:128911702:A:G
NM_000890.5(KCNJ5):c.1124G>A (p.Arg375Gln)	KCNJ5	R375Q	Long QT syndrome	Uncertain significance(Last reviewed: Nov 12, 2019)	criteria provided, single submitter	VCV000238195	11	128786490	11	128916595	238195	241065	rs530587789	NC_000011.10:128916594:G:A
NM_000890.5(KCNJ5):c.667G>A (p.Asp223Asn)	KCNJ5	D223N	Long QT syndrome	Uncertain significance(Last reviewed: Nov 2, 2015)	criteria provided, single submitter	VCV000221021	11	128781835	11	128911940	221021	222134	rs761349623	NC_000011.10:128911939:G:A
NM_000890.5(KCNJ5):c.86C>A (p.Ala29Asp)	KCNJ5	A29D	Long QT syndrome	Uncertain significance(Last reviewed: Feb 14, 2015)	criteria provided, single submitter	VCV000216485	11	128781254	11	128911359	216485	212920	rs863224689	NC_000011.10:128911358:C:A
NM_000890.5(KCNJ5):c.658C>T (p.Arg220Trp)	KCNJ5	R220W	Long QT syndrome	Uncertain significance(Last reviewed: Jan 31, 2015)	criteria provided, single submitter	VCV000216484	11	128781826	11	128911931	216484	212922	rs772551729	NC_000011.10:128911930:C:T
NM_000890.5(KCNJ5):c.703C>T (p.Arg235Trp)	KCNJ5	R235W	not provided|Long QT syndrome	Uncertain significance(Last reviewed: Sep 24, 2019)	criteria provided, multiple submitters, no conflicts	VCV000190829	11	128781871	11	128911976	190829	188514	rs148462487	NC_000011.10:128911975:C:T
NM_000890.5(KCNJ5):c.344G>A (p.Arg115Gln)	KCNJ5	R115Q	not provided	Uncertain significance(Last reviewed: Jun 18, 2014)	criteria provided, single submitter	VCV000190827	11	128781512	11	128911617	190827	188512	rs369247802	NC_000011.10:128911616:G:A
NM_000890.5(KCNJ5):c.314G>C (p.Gly105Ala)	KCNJ5	G105A	Long QT syndrome|not provided	Uncertain significance(Last reviewed: Nov 18, 2019)	criteria provided, multiple submitters, no conflicts	VCV000190826	11	128781482	11	128911587	190826	188511	rs776932193	NC_000011.10:128911586:G:C
NM_000890.5(KCNJ5):c.133G>A (p.Glu45Lys)	KCNJ5	E45K	Long QT syndrome|not provided	Likely benign(Last reviewed: Jul 20, 2020)	criteria provided, multiple submitters, no conflicts	VCV000190825	11	128781301	11	128911406	190825	188510	rs372447456	NC_000011.10:128911405:G:A
NM_000890.5(KCNJ5):c.10G>A (p.Asp4Asn)	KCNJ5	D4N	not provided|Long QT syndrome	Conflicting interpretations of pathogenicity(Last reviewed: Dec 12, 2019)	criteria provided, conflicting interpretations	VCV000190824	11	128781178	11	128911283	190824	188509	rs529755922	NC_000011.10:128911282:G:A
NM_000890.5(KCNJ5):c.121C>T (p.Arg41Cys)	KCNJ5	R41C	Cardiovascular phenotype|Long QT syndrome|Primary dilated cardiomyopathy|Congenital long QT syndrome|not specified|not provided|Long QT syndrome|Familial hyperaldosteronism type 3	Benign/Likely benign(Last reviewed: Dec 7, 2020)	criteria provided, multiple submitters, no conflicts	VCV000188315	11	128781289	11	128911394	188315	186151	rs115012103	NC_000011.10:128911393:C:T
NM_000890.5(KCNJ5):c.844C>G (p.Gln282Glu)	KCNJ5	Q282E	Familial hyperaldosteronism type 3|not specified|Cardiovascular phenotype|Long QT syndrome 13|Long QT syndrome|Congenital long QT syndrome	Benign(Last reviewed: Aug 19, 2021)	criteria provided, multiple submitters, no conflicts	VCV000137993	11	128782012	11	128912117	137993	141696	rs7102584	NC_000011.10:128912116:C:G
NM_000890.5(KCNJ5):c.736G>A (p.Glu246Lys)	KCNJ5	E246K	Familial hyperaldosteronism type 3	Pathogenic(Last reviewed: Apr 1, 2014)	no assertion criteria provided	VCV000135681	11	128781904	11	128912009	135681	139393	rs587777439	NC_000011.10:128912008:G:A
NM_000890.5(KCNJ5):c.470T>G (p.Ile157Ser)	KCNJ5	I157S	Familial hyperaldosteronism type 3	Pathogenic(Last reviewed: Aug 1, 2012)	no assertion criteria provided	VCV000135680	11	128781638	11	128911743	135680	139392	rs587777438	NC_000011.10:128911742:T:G
NM_000890.5(KCNJ5):c.452G>A (p.Gly151Glu)	KCNJ5	G151E	Long QT syndrome|Familial hyperaldosteronism type 3	Pathogenic(Last reviewed: Aug 22, 2019)	criteria provided, single submitter	VCV000135679	11	128781620	11	128911725	135679	139391	rs587777437	NC_000011.10:128911724:G:A
NM_000890.5(KCNJ5):c.739G>A (p.Gly247Arg)	KCNJ5	G247R	not provided|Long QT syndrome	Conflicting interpretations of pathogenicity(Last reviewed: Jan 23, 2020)	criteria provided, conflicting interpretations	VCV000135677	11	128781907	11	128912012	135677	139389	rs200170681	NC_000011.10:128912011:G:A
NM_000890.5(KCNJ5):c.503T>G (p.Leu168Arg)	KCNJ5	L168R	not provided	Likely pathogenic	no assertion criteria provided	VCV000091917	11	128781671	11	128911776	91917	97395	rs386352318	NC_000011.10:128911775:T:G
NM_000890.5(KCNJ5):c.451G>C (p.Gly151Arg)	KCNJ5	G151R	not provided	Likely pathogenic	no assertion criteria provided	VCV000091916	11	128781619	11	128911724	91916	97394	rs386352319	NC_000011.10:128911723:G:C
NM_000890.5(KCNJ5):c.451G>A (p.Gly151Arg)	KCNJ5	G151R	Familial hyperaldosteronism type 3|Aldosterone-producing adrenal adenoma, somatic|not provided	Pathogenic(Last reviewed: Aug 16, 2019)	criteria provided, single submitter	VCV000091915	11	128781619	11	128911724	91915	97393	rs386352319	NC_000011.10:128911723:G:A
NM_000890.5(KCNJ5):c.472A>G (p.Thr158Ala)	KCNJ5	T158A	Aldosterone-producing adrenal adenoma, somatic|Familial hyperaldosteronism type 3|Andersen Tawil syndrome	Pathogenic(Last reviewed: Aug 6, 2015)	no assertion criteria provided	VCV000030125	11	128781640	11	128911745	30125	39081	rs387906778	NC_000011.10:128911744:A:G
NM_000890.5(KCNJ5):c.1159G>C (p.Gly387Arg)	KCNJ5	G387R	Long QT syndrome|Familial hyperaldosteronism type 3|Andersen Tawil syndrome|Long QT syndrome 13	Conflicting interpretations of pathogenicity(Last reviewed: Dec 31, 2019)	criteria provided, conflicting interpretations	VCV000008856	11	128786525	11	128916630	8856	23895	rs199830292	NC_000011.10:128916629:G:C
NM_002240.5(KCNJ6):c.139G>A (p.Asp47Asn)	KCNJ6	D47N	not provided	Uncertain significance(Last reviewed: Aug 28, 2019)	criteria provided, single submitter	VCV001308084	21	39087321	21	37715018	1308084	1296705		NC_000021.9:37715017:C:T
NM_002240.5(KCNJ6):c.191A>G (p.Asn64Ser)	KCNJ6	N64S	Keppen-Lubinsky syndrome	Uncertain significance(Last reviewed: Jun 29, 2021)	criteria provided, single submitter	VCV001232299	21	39087269	21	37714966	1232299	1222288		NC_000021.9:37714965:T:C
NM_002240.5(KCNJ6):c.157A>G (p.Ile53Val)	KCNJ6	I53V	not provided	Likely benign(Last reviewed: Dec 7, 2019)	criteria provided, single submitter	VCV001080222	21	39087303	21	37715000	1080222	1085700		NC_000021.9:37714999:T:C
NM_002240.5(KCNJ6):c.8A>T (p.Lys3Met)	KCNJ6	K3M	Keppen-Lubinsky syndrome	not provided	no assertion provided	VCV000585052	21	39212977	21	37840675	585052	576188	rs748430470	NC_000021.9:37840674:T:A
NM_002240.5(KCNJ6):c.512T>G (p.Leu171Arg)	KCNJ6	L171R	Keppen-Lubinsky syndrome	Likely pathogenic	criteria provided, single submitter	VCV000431712	21	39086948	21	37714645	431712	425231	rs1556023562	NC_000021.9:37714644:A:C
NM_002240.5(KCNJ6):c.76G>T (p.Ala26Ser)	KCNJ6	A26S	not provided	Uncertain significance(Last reviewed: Mar 13, 2017)	criteria provided, single submitter	VCV000424149	21	39087384	21	37715081	424149	410873	rs1064796826	NC_000021.9:37715080:C:A
NM_002240.5(KCNJ6):c.460G>A (p.Gly154Ser)	KCNJ6	G154S	Keppen-Lubinsky syndrome	Pathogenic(Last reviewed: Feb 5, 2015)	no assertion criteria provided	VCV000189255	21	39087000	21	37714697	189255	187137	rs786204795	NC_000021.9:37714696:C:T
NM_004982.4(KCNJ8):c.701C>T (p.Thr234Ile)	KCNJ8	T234I	Brugada syndrome	Uncertain significance(Last reviewed: Jul 29, 2020)	criteria provided, single submitter	VCV001037883	12	21919231	12	21766297	1037883	1030875	rs369660507	NC_000012.12:21766296:G:A
NM_004982.4(KCNJ8):c.1176G>A (p.Met392Ile)	KCNJ8	M392I	Brugada syndrome	Uncertain significance(Last reviewed: Apr 29, 2020)	criteria provided, single submitter	VCV001037543	12	21918756	12	21765822	1037543	1030874	rs1940604697	NC_000012.12:21765821:C:T
NM_004982.4(KCNJ8):c.601G>A (p.Val201Ile)	KCNJ8	V201I	Brugada syndrome	Uncertain significance(Last reviewed: Sep 20, 2020)	criteria provided, single submitter	VCV001026931	12	21919331	12	21766397	1026931	1010348	rs750317966	NC_000012.12:21766396:C:T
NM_004982.4(KCNJ8):c.778T>C (p.Phe260Leu)	KCNJ8	F260L	Brugada syndrome	Uncertain significance(Last reviewed: Oct 7, 2020)	criteria provided, single submitter	VCV001020159	12	21919154	12	21766220	1020159	1010347	rs1940616222	NC_000012.12:21766219:A:G
NM_004982.4(KCNJ8):c.1232A>C (p.Gln411Pro)	KCNJ8	Q411P	Brugada syndrome	Uncertain significance(Last reviewed: Jun 21, 2020)	criteria provided, single submitter	VCV001016861	12	21918700	12	21765766	1016861	1010345	rs1940602689	NC_000012.12:21765765:T:G
NM_004982.4(KCNJ8):c.1145A>G (p.Lys382Arg)	KCNJ8	K382R	Brugada syndrome	Uncertain significance(Last reviewed: Nov 10, 2019)	criteria provided, single submitter	VCV000953104	12	21918787	12	21765853	953104	947958	rs752063865	NC_000012.12:21765852:T:C
NM_004982.4(KCNJ8):c.820C>T (p.Arg274Cys)	KCNJ8	R274C	Brugada syndrome|Sudden unexplained death	Uncertain significance(Last reviewed: Mar 7, 2018)	criteria provided, single submitter	VCV000810767	12	21919112	12	21766178	810767	799007	rs781083385	NC_000012.12:21766177:G:A
NM_004982.4(KCNJ8):c.1194C>G (p.Ile398Met)	KCNJ8	I398M	Hypertrophic cardiomyopathy	Likely benign(Last reviewed: Feb 5, 2019)	criteria provided, single submitter	VCV000691727	12	21918738	12	21765804	691727	679456	rs765422464	NC_000012.12:21765803:G:C
NM_004982.4(KCNJ8):c.1166A>G (p.Asn389Ser)	KCNJ8	N389S	Brugada syndrome	Uncertain significance(Last reviewed: Oct 2, 2018)	criteria provided, single submitter	VCV000664966	12	21918766	12	21765832	664966	641017	rs368674776	NC_000012.12:21765831:T:C
NM_004982.4(KCNJ8):c.1218G>A (p.Met406Ile)	KCNJ8	M406I	Brugada syndrome	Uncertain significance(Last reviewed: Oct 9, 2018)	criteria provided, single submitter	VCV000660991	12	21918714	12	21765780	660991	641016	rs1591882812	NC_000012.12:21765779:C:T
NM_004982.4(KCNJ8):c.1070A>G (p.Glu357Gly)	KCNJ8	E357G	Brugada syndrome	Uncertain significance(Last reviewed: Sep 25, 2018)	criteria provided, single submitter	VCV000652685	12	21918862	12	21765928	652685	641018	rs1591883003	NC_000012.12:21765927:T:C
NM_004982.4(KCNJ8):c.137C>T (p.Ala46Val)	KCNJ8	A46V	Brugada syndrome	Uncertain significance(Last reviewed: Apr 3, 2018)	criteria provided, single submitter	VCV000581090	12	21926414	12	21773480	581090	565383	rs1565662161	NC_000012.12:21773479:G:A
NM_004982.4(KCNJ8):c.719T>C (p.Val240Ala)	KCNJ8	V240A	Brugada syndrome	Uncertain significance(Last reviewed: May 8, 2018)	criteria provided, single submitter	VCV000573418	12	21919213	12	21766279	573418	567945	rs146747000	NC_000012.12:21766278:A:G
NM_004982.4(KCNJ8):c.112G>T (p.Ala38Ser)	KCNJ8	A38S	Brugada syndrome	Uncertain significance(Last reviewed: Jan 4, 2018)	criteria provided, single submitter	VCV000532107	12	21926439	12	21773505	532107	527556	rs1555172510	NC_000012.12:21773504:C:A
NM_004982.4(KCNJ8):c.88C>A (p.Arg30Ser)	KCNJ8	R30S	Cardiovascular phenotype|Brugada syndrome	Uncertain significance(Last reviewed: Jan 21, 2020)	criteria provided, multiple submitters, no conflicts	VCV000519449	12	21926463	12	21773529	519449	510358	rs749697322	NC_000012.12:21773528:G:T
NM_004982.4(KCNJ8):c.1036G>A (p.Val346Ile)	KCNJ8	V346I	not provided|not specified|Brugada syndrome	Conflicting interpretations of pathogenicity(Last reviewed: Oct 28, 2020)	criteria provided, conflicting interpretations	VCV000449327	12	21918896	12	21765962	449327	444957	rs147316959	NC_000012.12:21765961:C:T
NM_004982.4(KCNJ8):c.353C>T (p.Thr118Ile)	KCNJ8	T118I	Brugada syndrome 1	Uncertain significance(Last reviewed: Dec 29, 2016)	criteria provided, single submitter	VCV000431368	12	21926198	12	21773264	431368	424899	rs770087869	NC_000012.12:21773263:G:A
NM_004982.4(KCNJ8):c.6G>T (p.Leu2Phe)	KCNJ8	L2F	Cardiovascular phenotype	Uncertain significance(Last reviewed: Oct 2, 2013)	criteria provided, single submitter	VCV000263769	12	21926545	12	21773611	263769	258723	rs886038917	NC_000012.12:21773610:C:A
NM_004982.4(KCNJ8):c.83G>C (p.Arg28Pro)	KCNJ8	R28P	Cardiac arrest	Uncertain significance(Last reviewed: Nov 20, 2015)	criteria provided, single submitter	VCV000222678	12	21926468	12	21773534	222678	224437	rs768851540	NC_000012.12:21773533:C:G
NM_004982.4(KCNJ8):c.821G>A (p.Arg274His)	KCNJ8	R274H	Brugada syndrome	Uncertain significance(Last reviewed: Mar 15, 2015)	criteria provided, single submitter	VCV000216600	12	21919111	12	21766177	216600	212994	rs149127157	NC_000012.12:21766176:C:T
NM_004982.4(KCNJ8):c.263C>G (p.Ala88Gly)	KCNJ8	A88G	not provided|Brugada syndrome	Uncertain significance(Last reviewed: May 13, 2021)	criteria provided, multiple submitters, no conflicts	VCV000190832	12	21926288	12	21773354	190832	188534	rs117808169	NC_000012.12:21773353:G:C
NM_004982.4(KCNJ8):c.1182G>C (p.Arg394Ser)	KCNJ8	R394S	Cardiac arrhythmia|Brugada syndrome	Uncertain significance(Last reviewed: Feb 13, 2018)	criteria provided, single submitter	VCV000180388	12	21918750	12	21765816	180388	178650	rs730880120	NC_000012.12:21765815:C:G
NM_004982.4(KCNJ8):c.526T>A (p.Cys176Ser)	KCNJ8	C176S	not provided	Uncertain significance(Last reviewed: Jul 1, 2014)	no assertion criteria provided	VCV000157545	12	21919406	12	21766472	157545	167408	rs606231264	NC_000012.12:21766471:A:T
NM_004982.4(KCNJ8):c.193G>A (p.Val65Met)	KCNJ8	V65M	not provided	Uncertain significance(Last reviewed: Dec 1, 2013)	no assertion criteria provided	VCV000157544	12	21926358	12	21773424	157544	167407	rs606231263	NC_000012.12:21773423:C:T
NM_004982.4(KCNJ8):c.1265C>T (p.Ser422Leu)	KCNJ8	S422L	Cardiovascular phenotype|Brugada syndrome|not provided|Hypertrophic cardiomyopathy	Benign/Likely benign(Last reviewed: Oct 28, 2020)	criteria provided, multiple submitters, no conflicts	VCV000157543	12	21918667	12	21765733	157543	167406	rs72554071	NC_000012.12:21765732:G:A
NM_004982.4(KCNJ8):c.1001T>C (p.Val334Ala)	KCNJ8	V334A	Cardiovascular phenotype|SUDDEN INFANT DEATH SYNDROME|not specified|Brugada syndrome	Benign(Last reviewed: Dec 4, 2020)	criteria provided, multiple submitters, no conflicts	VCV000137998	12	21918931	12	21765997	137998	141701	rs34811413	NC_000012.12:21765996:A:G
