# Supplementary material for: Determinants of trafficking, conduction, and disease within a K+ channel revealed through multiparametric deep mutational scanning
Source: eLife journal article supplement (doi:10.7554/elife.76903), 2022-05-31
Supplement: supp [file KCNJ_Gnomad_0325322.xlsx]

## Sheet: Sheet1
Source2	Gene	Mutation	Clinical_Significance	ClinVar_ID
Gnomad	KCNJ1	M391I	Uncertain significance	935618
Gnomad	KCNJ1	K390T
Gnomad	KCNJ1	N384I	Uncertain significance	161825
Gnomad	KCNJ1	V383L
Gnomad	KCNJ1	L380F
Gnomad	KCNJ1	L380F
Gnomad	KCNJ1	N377K
Gnomad	KCNJ1	P376L
Gnomad	KCNJ1	Y373C
Gnomad	KCNJ1	G372S
Gnomad	KCNJ1	R371T
Gnomad	KCNJ1	K370E
Gnomad	KCNJ1	M369I
Gnomad	KCNJ1	R368G
Gnomad	KCNJ1	A367D
Gnomad	KCNJ1	R366T
Gnomad	KCNJ1	R366G
Gnomad	KCNJ1	V365I
Gnomad	KCNJ1	D364G	Uncertain significance	235615
Gnomad	KCNJ1	D364A
Gnomad	KCNJ1	K363T
Gnomad	KCNJ1	E362V
Gnomad	KCNJ1	N361K
Gnomad	KCNJ1	L359R
Gnomad	KCNJ1	M357I
Gnomad	KCNJ1	M357T	Benign	9158
Gnomad	KCNJ1	A356D
Gnomad	KCNJ1	E351A
Gnomad	KCNJ1	T347A
Gnomad	KCNJ1	S345N
Gnomad	KCNJ1	F344V
Gnomad	KCNJ1	F344L
Gnomad	KCNJ1	N343H
Gnomad	KCNJ1	H342Y
Gnomad	KCNJ1	D340G
Gnomad	KCNJ1	R338Q
Gnomad	KCNJ1	Y337C
Gnomad	KCNJ1	K336E
Gnomad	KCNJ1	T332K
Gnomad	KCNJ1	K331E
Gnomad	KCNJ1	S330F
Gnomad	KCNJ1	P327L	Uncertain significance	303569
Gnomad	KCNJ1	A326D
Gnomad	KCNJ1	A326S
Gnomad	KCNJ1	A326T
Gnomad	KCNJ1	R324H
Gnomad	KCNJ1	R324P
Gnomad	KCNJ1	R324C
Gnomad	KCNJ1	Y323C
Gnomad	KCNJ1	G322D
Gnomad	KCNJ1	G322S
Gnomad	KCNJ1	L320I
Gnomad	KCNJ1	L320V
Gnomad	KCNJ1	V319L
Gnomad	KCNJ1	E318D
Gnomad	KCNJ1	P316L
Gnomad	KCNJ1	P316A
Gnomad	KCNJ1	V315G
Gnomad	KCNJ1	Y314S
Gnomad	KCNJ1	Y314C
Gnomad	KCNJ1	S313F
Gnomad	KCNJ1	R311Q
Gnomad	KCNJ1	R311W
Gnomad	KCNJ1	T307I
Gnomad	KCNJ1	T307A
Gnomad	KCNJ1	A306V	Uncertain significance	1053514
Gnomad	KCNJ1	S305C
Gnomad	KCNJ1	V301M
Gnomad	KCNJ1	T300I	Uncertain significance	878156
Gnomad	KCNJ1	T300R	Uncertain significance	988597
Gnomad	KCNJ1	T300A
Gnomad	KCNJ1	G299S
Gnomad	KCNJ1	F296L
Gnomad	KCNJ1	V295A
Gnomad	KCNJ1	L286V
Gnomad	KCNJ1	T285A
Gnomad	KCNJ1	A283V
Gnomad	KCNJ1	A283T
Gnomad	KCNJ1	A282E
Gnomad	KCNJ1	A282G
Gnomad	KCNJ1	H280Y
Gnomad	KCNJ1	F279S
Gnomad	KCNJ1	P277R
Gnomad	KCNJ1	N275S
Gnomad	KCNJ1	I272T
Gnomad	KCNJ1	I272V
Gnomad	KCNJ1	I272F
Gnomad	KCNJ1	V271I
Gnomad	KCNJ1	P265L
Gnomad	KCNJ1	P265S
Gnomad	KCNJ1	S264P
Gnomad	KCNJ1	I263V
Gnomad	KCNJ1	A255T	Uncertain significance	879617
Gnomad	KCNJ1	D254G
Gnomad	KCNJ1	D254H
Gnomad	KCNJ1	N250S
Gnomad	KCNJ1	N250D
Gnomad	KCNJ1	I247T
Gnomad	KCNJ1	D245E
Gnomad	KCNJ1	I242V
Gnomad	KCNJ1	T241I
Gnomad	KCNJ1	E240D
Gnomad	KCNJ1	T236A
Gnomad	KCNJ1	V235A
Gnomad	KCNJ1	L230F
Gnomad	KCNJ1	G228E	Uncertain significance	631654
Gnomad	KCNJ1	G228V
Gnomad	KCNJ1	I226M
Gnomad	KCNJ1	S224N
Gnomad	KCNJ1	G223D
Gnomad	KCNJ1	G223R
Gnomad	KCNJ1	I222T
Gnomad	KCNJ1	L220R	Pathogenic	870375
Gnomad	KCNJ1	L220F	Pathogenic	872043
Gnomad	KCNJ1	S219R	Pathogenic	9155
Gnomad	KCNJ1	R217K
Gnomad	KCNJ1	N215D
Gnomad	KCNJ1	A214V	Pathogenic	9157
Gnomad	KCNJ1	A214T
Gnomad	KCNJ1	V213G
Gnomad	KCNJ1	V213M
Gnomad	KCNJ1	R212P	Uncertain significance	845433
Gnomad	KCNJ1	R212Q
Gnomad	KCNJ1	I211L
Gnomad	KCNJ1	L209F	Benign	303574
Gnomad	KCNJ1	C208S
Gnomad	KCNJ1	K206N
Gnomad	KCNJ1	G205R
Gnomad	KCNJ1	R203W
Gnomad	KCNJ1	K202E
Gnomad	KCNJ1	A198V
Gnomad	KCNJ1	N197K
Gnomad	KCNJ1	N197D
Gnomad	KCNJ1	K196N
Gnomad	KCNJ1	T193M	Benign	879618
Gnomad	KCNJ1	R188H
Gnomad	KCNJ1	R188S	Uncertain significance	1011893
Gnomad	KCNJ1	R188C	Conflicting interpretations of pathogenicity	225398
Gnomad	KCNJ1	K186N
Gnomad	KCNJ1	K186E
Gnomad	KCNJ1	P185L
Gnomad	KCNJ1	P185S
Gnomad	KCNJ1	R184G
Gnomad	KCNJ1	A180T
Gnomad	KCNJ1	A177S
Gnomad	KCNJ1	M174I
Gnomad	KCNJ1	M174I
Gnomad	KCNJ1	M174T
Gnomad	KCNJ1	F173L
Gnomad	KCNJ1	I170V
Gnomad	KCNJ1	I169V
Gnomad	KCNJ1	G167E	Pathogenic	9160
Gnomad	KCNJ1	I165T
Gnomad	KCNJ1	S164P
Gnomad	KCNJ1	Q163P
Gnomad	KCNJ1	L159M
Gnomad	KCNJ1	I157T
Gnomad	KCNJ1	Q152H
Gnomad	KCNJ1	T150R
Gnomad	KCNJ1	T141I
Gnomad	KCNJ1	T141S
Gnomad	KCNJ1	T141A
Gnomad	KCNJ1	F132L
Gnomad	KCNJ1	F132S
Gnomad	KCNJ1	F132L
Gnomad	KCNJ1	T129I
Gnomad	KCNJ1	T129A
Gnomad	KCNJ1	L128S
Gnomad	KCNJ1	G127D
Gnomad	KCNJ1	G127S
Gnomad	KCNJ1	V122E
Gnomad	KCNJ1	V122A
Gnomad	KCNJ1	T119A
Gnomad	KCNJ1	H118R
Gnomad	KCNJ1	H118Y
Gnomad	KCNJ1	N117S
Gnomad	KCNJ1	P114L
Gnomad	KCNJ1	P110Q
Gnomad	KCNJ1	P110L	Pathogenic	981532
Gnomad	KCNJ1	L109I
Gnomad	KCNJ1	L109F
Gnomad	KCNJ1	D108E
Gnomad	KCNJ1	D108G
Gnomad	KCNJ1	K107E	Uncertain significance	64392
Gnomad	KCNJ1	A103V
Gnomad	KCNJ1	V102G
Gnomad	KCNJ1	Y100C	Uncertain significance	64391
Gnomad	KCNJ1	W99C
Gnomad	KCNJ1	W99R
Gnomad	KCNJ1	F93S
Gnomad	KCNJ1	F93V
Gnomad	KCNJ1	S91T
Gnomad	KCNJ1	G90R
Gnomad	KCNJ1	F88C
Gnomad	KCNJ1	A87D
Gnomad	KCNJ1	A87V
Gnomad	KCNJ1	T86A	Benign	235236
Gnomad	KCNJ1	I85N
Gnomad	KCNJ1	K76N
Gnomad	KCNJ1	K76E
Gnomad	KCNJ1	D74A
Gnomad	KCNJ1	V72A
Gnomad	KCNJ1	T71M	Uncertain significance	631655
Gnomad	KCNJ1	T70I
Gnomad	KCNJ1	W69S
Gnomad	KCNJ1	W69G
Gnomad	KCNJ1	I68V
Gnomad	KCNJ1	I63V
Gnomad	KCNJ1	R61K
Gnomad	KCNJ1	E57K
Gnomad	KCNJ1	N55K
Gnomad	KCNJ1	E52K
Gnomad	KCNJ1	I51T
Gnomad	KCNJ1	C49Y	Uncertain significance	978165
Gnomad	KCNJ1	C49R
Gnomad	KCNJ1	G47E
Gnomad	KCNJ1	D46G
Gnomad	KCNJ1	D46N
Gnomad	KCNJ1	K45E
Gnomad	KCNJ1	R41M
Gnomad	KCNJ1	R37Q
Gnomad	KCNJ1	R37W
Gnomad	KCNJ1	H35R
Gnomad	KCNJ1	F32S
Gnomad	KCNJ1	F32C
Gnomad	KCNJ1	R31L
Gnomad	KCNJ1	R31H	Conflicting interpretations of pathogenicity	303576
Gnomad	KCNJ1	R31C
Gnomad	KCNJ1	T30P
Gnomad	KCNJ1	V29I
Gnomad	KCNJ1	V28I
Gnomad	KCNJ1	R25Q	Conflicting interpretations of pathogenicity	303577
Gnomad	KCNJ1	R25W
Gnomad	KCNJ1	L24V
Gnomad	KCNJ1	S19N
Gnomad	KCNJ1	T17A
Gnomad	KCNJ1	V15M
Gnomad	KCNJ1	V15L
Gnomad	KCNJ1	R14G
Gnomad	KCNJ1	T11M
Gnomad	KCNJ1	T11A
Gnomad	KCNJ1	R6Q
Gnomad	KCNJ1	R6W	Uncertain significance	834322
Gnomad	KCNJ1	S4F
Gnomad	KCNJ1	A3V
Gnomad	KCNJ2	A178S
Gnomad	KCNJ2	A202T
Gnomad	KCNJ2	A229S
Gnomad	KCNJ2	A290T	Uncertain significance	955520
Gnomad	KCNJ2	A317T
Gnomad	KCNJ2	A362G
Gnomad	KCNJ2	A362T
Gnomad	KCNJ2	A371E	Uncertain significance	468462
Gnomad	KCNJ2	A412S
Gnomad	KCNJ2	A70S	Uncertain significance	403977
Gnomad	KCNJ2	A70T	Uncertain significance	190807
Gnomad	KCNJ2	A91V
Gnomad	KCNJ2	C101F	Uncertain significance	449152
Gnomad	KCNJ2	C356F	Uncertain significance	658326
Gnomad	KCNJ2	C43R
Gnomad	KCNJ2	C43Y	Uncertain significance	1054264
Gnomad	KCNJ2	D17G
Gnomad	KCNJ2	D17H
Gnomad	KCNJ2	D205E
Gnomad	KCNJ2	D246Y
Gnomad	KCNJ2	D259N
Gnomad	KCNJ2	D276G
Gnomad	KCNJ2	D286G
Gnomad	KCNJ2	D389G
Gnomad	KCNJ2	D389H
Gnomad	KCNJ2	D389N	Uncertain significance	842216
Gnomad	KCNJ2	D401G
Gnomad	KCNJ2	D405Y
Gnomad	KCNJ2	E118D
Gnomad	KCNJ2	E16D
Gnomad	KCNJ2	E16G
Gnomad	KCNJ2	E327K
Gnomad	KCNJ2	E349K	Uncertain significance	190818
Gnomad	KCNJ2	E387K
Gnomad	KCNJ2	F129S
Gnomad	KCNJ2	F159L
Gnomad	KCNJ2	F159S
Gnomad	KCNJ2	F98I
Gnomad	KCNJ2	F98V
Gnomad	KCNJ2	G18S	Uncertain significance	536360
Gnomad	KCNJ2	G206S	Uncertain significance	281601
Gnomad	KCNJ2	G33R	Uncertain significance	1163708
Gnomad	KCNJ2	I106T
Gnomad	KCNJ2	I137T
Gnomad	KCNJ2	I156V
Gnomad	KCNJ2	I166V
Gnomad	KCNJ2	I171V	Uncertain significance	964778
Gnomad	KCNJ2	I175L	Uncertain significance	1060569
Gnomad	KCNJ2	I248M
Gnomad	KCNJ2	I248T
Gnomad	KCNJ2	I258M
Gnomad	KCNJ2	I261V	Uncertain significance	691668
Gnomad	KCNJ2	I267V	Uncertain significance	1012428
Gnomad	KCNJ2	I269V
Gnomad	KCNJ2	I287L	Uncertain significance	951649
Gnomad	KCNJ2	I72M
Gnomad	KCNJ2	I87V	Uncertain significance	656328
Gnomad	KCNJ2	K120T	Uncertain significance	432434
Gnomad	KCNJ2	K334T
Gnomad	KCNJ2	K34N
Gnomad	KCNJ2	K34R	Uncertain significance	661299
Gnomad	KCNJ2	K364N
Gnomad	KCNJ2	K365Q
Gnomad	KCNJ2	L105M
Gnomad	KCNJ2	L108V
Gnomad	KCNJ2	L109F
Gnomad	KCNJ2	L134I
Gnomad	KCNJ2	L232F
Gnomad	KCNJ2	L279F
Gnomad	KCNJ2	L282W	Uncertain significance	468468
Gnomad	KCNJ2	L355F
Gnomad	KCNJ2	L408V	Benign	1194680
Gnomad	KCNJ2	M160V
Gnomad	KCNJ2	M301V	Conflicting interpretations of pathogenicity	190816
Gnomad	KCNJ2	N251S	Uncertain significance	453204
Gnomad	KCNJ2	N318S	Uncertain significance	161257
Gnomad	KCNJ2	N370K
Gnomad	KCNJ2	N372S
Gnomad	KCNJ2	N410S	Conflicting interpretations of pathogenicity	190804
Gnomad	KCNJ2	P403T
Gnomad	KCNJ2	P404R	Uncertain significance	890719
Gnomad	KCNJ2	P415H
Gnomad	KCNJ2	P415L	Uncertain significance	190819
Gnomad	KCNJ2	P420L	Conflicting interpretations of pathogenicity	264482
Gnomad	KCNJ2	Q285E
Gnomad	KCNJ2	Q57R
Gnomad	KCNJ2	R213Q
Gnomad	KCNJ2	R260H
Gnomad	KCNJ2	R312C	Pathogenic	67594
Gnomad	KCNJ2	R325C	Uncertain significance	190821
Gnomad	KCNJ2	R40Q	Uncertain significance	324830
Gnomad	KCNJ2	R422P
Gnomad	KCNJ2	R422Q
Gnomad	KCNJ2	R422W
Gnomad	KCNJ2	R423Q	Uncertain significance	222677
Gnomad	KCNJ2	R46H
Gnomad	KCNJ2	R5Q	Uncertain significance	1052929
Gnomad	KCNJ2	R8C	Uncertain significance	890665
Gnomad	KCNJ2	R8H	Uncertain significance	844830
Gnomad	KCNJ2	S10N
Gnomad	KCNJ2	S283N
Gnomad	KCNJ2	S342C
Gnomad	KCNJ2	S35G
Gnomad	KCNJ2	S35T
Gnomad	KCNJ2	S390I
Gnomad	KCNJ2	S399G
Gnomad	KCNJ2	S413I
Gnomad	KCNJ2	S413N
Gnomad	KCNJ2	S425L
Gnomad	KCNJ2	T130M	Uncertain significance	969996
Gnomad	KCNJ2	T151M
Gnomad	KCNJ2	T237I
Gnomad	KCNJ2	T308M
Gnomad	KCNJ2	T353I
Gnomad	KCNJ2	T39I
Gnomad	KCNJ2	T400A
Gnomad	KCNJ2	T400M	Uncertain significance	161258
Gnomad	KCNJ2	T400R
Gnomad	KCNJ2	T402K
Gnomad	KCNJ2	T402M	Uncertain significance	518798
Gnomad	KCNJ2	T6I
Gnomad	KCNJ2	V102M
Gnomad	KCNJ2	V167M
Gnomad	KCNJ2	V179I
Gnomad	KCNJ2	V270A
Gnomad	KCNJ2	V295G
Gnomad	KCNJ2	V329L
Gnomad	KCNJ2	V394A
Gnomad	KCNJ2	V4M
Gnomad	KCNJ2	V93I	Conflicting interpretations of pathogenicity	30121
Gnomad	KCNJ2	Y376C
Gnomad	KCNJ3	A3V
Gnomad	KCNJ3	F8S
Gnomad	KCNJ3	F8L
Gnomad	KCNJ3	D11Y
Gnomad	KCNJ3	V14I
Gnomad	KCNJ3	S18A
Gnomad	KCNJ3	G28R
Gnomad	KCNJ3	G28E
Gnomad	KCNJ3	Q35L
Gnomad	KCNJ3	Q35H
Gnomad	KCNJ3	L37F
Gnomad	KCNJ3	P39S
Gnomad	KCNJ3	K40R
Gnomad	KCNJ3	R45L
Gnomad	KCNJ3	G58R
Gnomad	KCNJ3	L68F
Gnomad	KCNJ3	T90I
Gnomad	KCNJ3	M98T
Gnomad	KCNJ3	V104A
Gnomad	KCNJ3	T108A
Gnomad	KCNJ3	N113S
Gnomad	KCNJ3	H116Q
Gnomad	KCNJ3	V127G
Gnomad	KCNJ3	I138F
Gnomad	KCNJ3	E141G
Gnomad	KCNJ3	I151V
Gnomad	KCNJ3	K154R
Gnomad	KCNJ3	I160T
Gnomad	KCNJ3	M195R
Gnomad	KCNJ3	E198K
Gnomad	KCNJ3	H199N
Gnomad	KCNJ3	H199L
Gnomad	KCNJ3	A200S
Gnomad	KCNJ3	I202V
Gnomad	KCNJ3	M204V
Gnomad	KCNJ3	G207R
Gnomad	KCNJ3	N220D
Gnomad	KCNJ3	R236W
Gnomad	KCNJ3	G241D
Gnomad	KCNJ3	T257I
Gnomad	KCNJ3	G258W
Gnomad	KCNJ3	V265L
Gnomad	KCNJ3	P267L
Gnomad	KCNJ3	L268V
Gnomad	KCNJ3	T269A
Gnomad	KCNJ3	C271S
Gnomad	KCNJ3	V273M
Gnomad	KCNJ3	D275N
Gnomad	KCNJ3	A276D
Gnomad	KCNJ3	K277R
Gnomad	KCNJ3	P279S
Gnomad	KCNJ3	F280I
Gnomad	KCNJ3	R286Q
Gnomad	KCNJ3	M288I
Gnomad	KCNJ3	Q289K
Gnomad	KCNJ3	Q289R
Gnomad	KCNJ3	Q289H
Gnomad	KCNJ3	G235V
Gnomad	KCNJ3	T317I
Gnomad	KCNJ3	L322F
Gnomad	KCNJ3	H325Y
Gnomad	KCNJ3	R326H
Gnomad	KCNJ3	F328L
Gnomad	KCNJ3	S357C
Gnomad	KCNJ3	K359R
Gnomad	KCNJ3	K359N
Gnomad	KCNJ3	M367T
Gnomad	KCNJ3	S369P
Gnomad	KCNJ3	I372L
Gnomad	KCNJ3	I372M
Gnomad	KCNJ3	A373E
Gnomad	KCNJ3	K380E
Gnomad	KCNJ3	E381D
Gnomad	KCNJ3	R382G
Gnomad	KCNJ3	D393N
Gnomad	KCNJ3	D393E
Gnomad	KCNJ3	I395T
Gnomad	KCNJ3	T397I
Gnomad	KCNJ3	T397K
Gnomad	KCNJ3	K402N
Gnomad	KCNJ3	Q404H
Gnomad	KCNJ3	G408R
Gnomad	KCNJ3	L416R
Gnomad	KCNJ3	R418K
Gnomad	KCNJ3	R418S
Gnomad	KCNJ3	S420N
Gnomad	KCNJ3	A427P
Gnomad	KCNJ3	A427V
Gnomad	KCNJ3	G431A
Gnomad	KCNJ3	M435R
Gnomad	KCNJ3	R439Q
Gnomad	KCNJ3	P444L
Gnomad	KCNJ3	E448K
Gnomad	KCNJ3	V452I
Gnomad	KCNJ3	S453A
Gnomad	KCNJ3	K457R
Gnomad	KCNJ3	M458T
Gnomad	KCNJ3	M463V
Gnomad	KCNJ3	M463K
Gnomad	KCNJ3	P472S
Gnomad	KCNJ3	M477I
Gnomad	KCNJ3	A478S
Gnomad	KCNJ3	M484V
Gnomad	KCNJ3	N487K
Gnomad	KCNJ3	N496H
Gnomad	KCNJ3	R499C
Gnomad	KCNJ3	T501K
Gnomad	KCNJ4	R440H
Gnomad	KCNJ4	R440C
Gnomad	KCNJ4	I437V
Gnomad	KCNJ4	D435E
Gnomad	KCNJ4	L434P
Gnomad	KCNJ4	L434M
Gnomad	KCNJ4	A430V
Gnomad	KCNJ4	M428I
Gnomad	KCNJ4	M428I
Gnomad	KCNJ4	M428V
Gnomad	KCNJ4	R427L
Gnomad	KCNJ4	R427H
Gnomad	KCNJ4	R427C
Gnomad	KCNJ4	G420S
Gnomad	KCNJ4	R415Q
Gnomad	KCNJ4	I413T
Gnomad	KCNJ4	I413V
Gnomad	KCNJ4	G412S
Gnomad	KCNJ4	A411G
Gnomad	KCNJ4	E410K
Gnomad	KCNJ4	E409K
Gnomad	KCNJ4	K408N
Gnomad	KCNJ4	K408R
Gnomad	KCNJ4	G406D
Gnomad	KCNJ4	G406S
Gnomad	KCNJ4	A399T
Gnomad	KCNJ4	A399S
Gnomad	KCNJ4	A398T
Gnomad	KCNJ4	A396V
Gnomad	KCNJ4	A394V
Gnomad	KCNJ4	A394S
Gnomad	KCNJ4	A393V
Gnomad	KCNJ4	A392G
Gnomad	KCNJ4	A391T
Gnomad	KCNJ4	E389K
Gnomad	KCNJ4	E386D
Gnomad	KCNJ4	E386V
Gnomad	KCNJ4	E385D
Gnomad	KCNJ4	E385K
Gnomad	KCNJ4	E383Q
Gnomad	KCNJ4	S381N
Gnomad	KCNJ4	S381C
Gnomad	KCNJ4	M380I
Gnomad	KCNJ4	M380I
Gnomad	KCNJ4	M380T
Gnomad	KCNJ4	M380V
Gnomad	KCNJ4	L379F
Gnomad	KCNJ4	A370T
Gnomad	KCNJ4	P365L
Gnomad	KCNJ4	A363P
Gnomad	KCNJ4	A363T
Gnomad	KCNJ4	P362L
Gnomad	KCNJ4	V360M
Gnomad	KCNJ4	R351Q
Gnomad	KCNJ4	R351W
Gnomad	KCNJ4	C347Y
Gnomad	KCNJ4	T345M
Gnomad	KCNJ4	G344S
Gnomad	KCNJ4	E341V
Gnomad	KCNJ4	E341K
Gnomad	KCNJ4	R335H
Gnomad	KCNJ4	S334A
Gnomad	KCNJ4	K330M
Gnomad	KCNJ4	V321M
Gnomad	KCNJ4	P320A
Gnomad	KCNJ4	R317H
Gnomad	KCNJ4	R317C
Gnomad	KCNJ4	E311K
Gnomad	KCNJ4	V287M
Gnomad	KCNJ4	D283N
Gnomad	KCNJ4	S281L
Gnomad	KCNJ4	E278A
Gnomad	KCNJ4	G273R
Gnomad	KCNJ4	E264K
Gnomad	KCNJ4	I261T
Gnomad	KCNJ4	S257L
Gnomad	KCNJ4	R252C
Gnomad	KCNJ4	N243S
Gnomad	KCNJ4	R240Q
Gnomad	KCNJ4	R240W
Gnomad	KCNJ4	D238Y
Gnomad	KCNJ4	L237V
Gnomad	KCNJ4	P236A
Gnomad	KCNJ4	Y234H
Gnomad	KCNJ4	Q230R
Gnomad	KCNJ4	R220Q
Gnomad	KCNJ4	V219M
Gnomad	KCNJ4	R205C
Gnomad	KCNJ4	G198S
Gnomad	KCNJ4	D197N
Gnomad	KCNJ4	V195L
Gnomad	KCNJ4	H190Q
Gnomad	KCNJ4	A176V
Gnomad	KCNJ4	V162I
Gnomad	KCNJ4	V159M
Gnomad	KCNJ4	V154M
Gnomad	KCNJ4	A152T
Gnomad	KCNJ4	P147R
Gnomad	KCNJ4	P147L
Gnomad	KCNJ4	V142M
Gnomad	KCNJ4	G123S
Gnomad	KCNJ4	F121L
Gnomad	KCNJ4	V118M
Gnomad	KCNJ4	P111L
Gnomad	KCNJ4	V109M
Gnomad	KCNJ4	P108L
Gnomad	KCNJ4	G105R
Gnomad	KCNJ4	G104V
Gnomad	KCNJ4	G104S
Gnomad	KCNJ4	G102R
Gnomad	KCNJ4	A101V
Gnomad	KCNJ4	A101S
Gnomad	KCNJ4	A100V
Gnomad	KCNJ4	P99L
Gnomad	KCNJ4	A96V
Gnomad	KCNJ4	A95V
Gnomad	KCNJ4	V93M
Gnomad	KCNJ4	V93L
Gnomad	KCNJ4	F82L
Gnomad	KCNJ4	G74S
Gnomad	KCNJ4	L71F
Gnomad	KCNJ4	A64T
Gnomad	KCNJ4	M60V
Gnomad	KCNJ4	S39L
Gnomad	KCNJ4	N34I
Gnomad	KCNJ4	A33T
Gnomad	KCNJ4	V30M
Gnomad	KCNJ4	N25S
Gnomad	KCNJ4	R18H
Gnomad	KCNJ4	R18C
Gnomad	KCNJ4	K16N
Gnomad	KCNJ4	R15Q
Gnomad	KCNJ4	R15W
Gnomad	KCNJ4	R14Q
Gnomad	KCNJ4	R14W
Gnomad	KCNJ4	P13L
Gnomad	KCNJ4	P13S
Gnomad	KCNJ4	V12M
Gnomad	KCNJ4	R6H
Gnomad	KCNJ4	S5T
Gnomad	KCNJ5	A2S
Gnomad	KCNJ5	D4N	Conflicting interpretations of pathogenicity	190824
Gnomad	KCNJ5	I15L
Gnomad	KCNJ5	G16E
Gnomad	KCNJ5	V17D
Gnomad	KCNJ5	T18I	Uncertain significance	1008531
Gnomad	KCNJ5	P19S
Gnomad	KCNJ5	D21H
Gnomad	KCNJ5	D21E
Gnomad	KCNJ5	P22T
Gnomad	KCNJ5	K23N
Gnomad	KCNJ5	P26L
Gnomad	KCNJ5	Q28R
Gnomad	KCNJ5	A29D	Uncertain significance	216485
Gnomad	KCNJ5	R30C
Gnomad	KCNJ5	R30H
Gnomad	KCNJ5	I35V
Gnomad	KCNJ5	R39S
Gnomad	KCNJ5	R39C
Gnomad	KCNJ5	R39H
Gnomad	KCNJ5	T40M	Uncertain significance	1010966
Gnomad	KCNJ5	R41C	Benign	188315
Gnomad	KCNJ5	R41L
Gnomad	KCNJ5	R41H	Benign	457005
Gnomad	KCNJ5	E45K	Benign	190825
Gnomad	KCNJ5	G46S
Gnomad	KCNJ5	K47N
Gnomad	KCNJ5	P49T
Gnomad	KCNJ5	P49S
Gnomad	KCNJ5	R50C	Uncertain significance	1014195
Gnomad	KCNJ5	R50P
Gnomad	KCNJ5	R50H
Gnomad	KCNJ5	R52H	Uncertain significance	1007137
Gnomad	KCNJ5	E55K
Gnomad	KCNJ5	K56N
Gnomad	KCNJ5	S57T
Gnomad	KCNJ5	G58S
Gnomad	KCNJ5	K59Q
Gnomad	KCNJ5	V62M	Uncertain significance	864385
Gnomad	KCNJ5	H64Y
Gnomad	KCNJ5	H64D
Gnomad	KCNJ5	G65S
Gnomad	KCNJ5	G65R
Gnomad	KCNJ5	N66D
Gnomad	KCNJ5	R72W	Uncertain significance	941579
Gnomad	KCNJ5	R72Q
Gnomad	KCNJ5	R72P
Gnomad	KCNJ5	S75N
Gnomad	KCNJ5	T79A
Gnomad	KCNJ5	R87C
Gnomad	KCNJ5	R87H	Uncertain significance	659892
Gnomad	KCNJ5	N89S
Gnomad	KCNJ5	L90F
Gnomad	KCNJ5	L91F
Gnomad	KCNJ5	V92I	Uncertain significance	1040985
Gnomad	KCNJ5	V96L
Gnomad	KCNJ5	V99I	Uncertain significance	1001977
Gnomad	KCNJ5	T100N
Gnomad	KCNJ5	G105S
Gnomad	KCNJ5	G105A	Uncertain significance	190826
Gnomad	KCNJ5	G105D
Gnomad	KCNJ5	I114M
Gnomad	KCNJ5	R115W
Gnomad	KCNJ5	R115Q	Uncertain significance	190827
Gnomad	KCNJ5	G116S
Gnomad	KCNJ5	L118P
Gnomad	KCNJ5	D119G
Gnomad	KCNJ5	H120Q
Gnomad	KCNJ5	V121I
Gnomad	KCNJ5	V121A
Gnomad	KCNJ5	D123N	Uncertain significance	457007
Gnomad	KCNJ5	E125D
Gnomad	KCNJ5	W126R
Gnomad	KCNJ5	C129R
Gnomad	KCNJ5	E131K
Gnomad	KCNJ5	V137M
Gnomad	KCNJ5	A139T	Uncertain significance	1008840
Gnomad	KCNJ5	I144V	Conflicting interpretations of pathogenicity	303628
Gnomad	KCNJ5	T146N
Gnomad	KCNJ5	E147K	Uncertain significance	432222
Gnomad	KCNJ5	T149A
Gnomad	KCNJ5	I150T	Uncertain significance	946292
Gnomad	KCNJ5	G151A
Gnomad	KCNJ5	R155L
Gnomad	KCNJ5	R155Q
Gnomad	KCNJ5	T158R
Gnomad	KCNJ5	E159Q
Gnomad	KCNJ5	E159G	Uncertain significance	877246
Gnomad	KCNJ5	C161W
Gnomad	KCNJ5	E163K
Gnomad	KCNJ5	G164A
Gnomad	KCNJ5	I165F
Gnomad	KCNJ5	L169F
Gnomad	KCNJ5	Q171P
Gnomad	KCNJ5	I173M
Gnomad	KCNJ5	G175D
Gnomad	KCNJ5	I177T
Gnomad	KCNJ5	V178I	Uncertain significance	1045677
Gnomad	KCNJ5	N179S	Uncertain significance	581128
Gnomad	KCNJ5	M182I
Gnomad	KCNJ5	C185F	Uncertain significance	572313
Gnomad	KCNJ5	M186I
Gnomad	KCNJ5	V188L
Gnomad	KCNJ5	R196I
Gnomad	KCNJ5	A206T	Uncertain significance	427972
Gnomad	KCNJ5	A206P
Gnomad	KCNJ5	I208T
Gnomad	KCNJ5	M210L
Gnomad	KCNJ5	M210I	Benign	404092
Gnomad	KCNJ5	R211W	Uncertain significance	1058806
Gnomad	KCNJ5	R211Q
Gnomad	KCNJ5	D212E
Gnomad	KCNJ5	E213K
Gnomad	KCNJ5	M218I
Gnomad	KCNJ5	R220W	Uncertain significance	216484
Gnomad	KCNJ5	R220Q
Gnomad	KCNJ5	G222D	Uncertain significance	429508
Gnomad	KCNJ5	D223N	Uncertain significance	221021
Gnomad	KCNJ5	R225C
Gnomad	KCNJ5	R225H	Uncertain significance	651091
Gnomad	KCNJ5	E231Q
Gnomad	KCNJ5	R235W	Uncertain significance	190829
Gnomad	KCNJ5	R235Q	Uncertain significance	1306130
Gnomad	KCNJ5	R242W	Uncertain significance	947956
Gnomad	KCNJ5	R242Q	Uncertain significance	836272
Gnomad	KCNJ5	E246K	Pathogenic	135681
Gnomad	KCNJ5	E246D
Gnomad	KCNJ5	G247R	Conflicting interpretations of pathogenicity	135677
Gnomad	KCNJ5	E248V
Gnomad	KCNJ5	I250F	Uncertain significance	963164
Gnomad	KCNJ5	N253K
Gnomad	KCNJ5	T255I
Gnomad	KCNJ5	V259M
Gnomad	KCNJ5	G260D
Gnomad	KCNJ5	T263M
Gnomad	KCNJ5	D265N
Gnomad	KCNJ5	D266N
Gnomad	KCNJ5	R267C
Gnomad	KCNJ5	L268I
Gnomad	KCNJ5	V271M
Gnomad	KCNJ5	I276T
Gnomad	KCNJ5	S277P
Gnomad	KCNJ5	H278Q
Gnomad	KCNJ5	E279K
Gnomad	KCNJ5	Q282K
Gnomad	KCNJ5	Q282E	Benign	137993
Gnomad	KCNJ5	P285T
Gnomad	KCNJ5	E288G
Gnomad	KCNJ5	E288D	Conflicting interpretations of pathogenicity	560690
Gnomad	KCNJ5	M289T	Uncertain significance	404091
Gnomad	KCNJ5	E298A
Gnomad	KCNJ5	F299S
Gnomad	KCNJ5	M308R
Gnomad	KCNJ5	T315A
Gnomad	KCNJ5	C316R
Gnomad	KCNJ5	R319W	Uncertain significance	1326808
Gnomad	KCNJ5	R319Q	Uncertain significance	878287
Gnomad	KCNJ5	M323V
Gnomad	KCNJ5	M323T	Uncertain significance	303632
Gnomad	KCNJ5	D324E
Gnomad	KCNJ5	T325S
Gnomad	KCNJ5	T325I
Gnomad	KCNJ5	R332Q
Gnomad	KCNJ5	L337F
Gnomad	KCNJ5	K341R
Gnomad	KCNJ5	N349D
Gnomad	KCNJ5	N349K
Gnomad	KCNJ5	T350I
Gnomad	KCNJ5	T354I
Gnomad	KCNJ5	Y355C
Gnomad	KCNJ5	T357I
Gnomad	KCNJ5	S361G
Gnomad	KCNJ5	G374D
Gnomad	KCNJ5	G374V	Uncertain significance	423691
Gnomad	KCNJ5	R375W	Uncertain significance	1060449
Gnomad	KCNJ5	R375Q	Uncertain significance	238195
Gnomad	KCNJ5	Q378R
Gnomad	KCNJ5	P381H
Gnomad	KCNJ5	P384L	Uncertain significance	1306167
Gnomad	KCNJ5	P384R	Uncertain significance	869438
Gnomad	KCNJ5	L385R
Gnomad	KCNJ5	G387R	Conflicting interpretations of pathogenicity	8856
Gnomad	KCNJ5	G387E
Gnomad	KCNJ5	G388C
Gnomad	KCNJ5	G388V
Gnomad	KCNJ5	G388D
Gnomad	KCNJ5	C389Y
Gnomad	KCNJ5	A390V
Gnomad	KCNJ5	A392V
Gnomad	KCNJ5	G393E
Gnomad	KCNJ5	L394M
Gnomad	KCNJ5	D395A	Uncertain significance	404093
Gnomad	KCNJ5	D395E
Gnomad	KCNJ5	A396T	Uncertain significance	520527
Gnomad	KCNJ5	E397G	Uncertain significance	457004
Gnomad	KCNJ5	A398T
Gnomad	KCNJ5	N401K
Gnomad	KCNJ5	E403K
Gnomad	KCNJ5	E405K
Gnomad	KCNJ5	P406L
Gnomad	KCNJ5	K407R	Uncertain significance	843194
Gnomad	KCNJ5	G410S
Gnomad	KCNJ5	A415P
Gnomad	KCNJ5	S418L
Gnomad	KCNJ5	S418W
Gnomad	KCNJ6	V414M
Gnomad	KCNJ6	G412A
Gnomad	KCNJ6	E409K
Gnomad	KCNJ6	Q407E
Gnomad	KCNJ6	E406Q
Gnomad	KCNJ6	E405K
Gnomad	KCNJ6	N403K
Gnomad	KCNJ6	K402E
Gnomad	KCNJ6	A393S
Gnomad	KCNJ6	H392Q
Gnomad	KCNJ6	H392Y
Gnomad	KCNJ6	Q391H
Gnomad	KCNJ6	N390S
Gnomad	KCNJ6	S387N
Gnomad	KCNJ6	S387G
Gnomad	KCNJ6	S386F
Gnomad	KCNJ6	V385L
Gnomad	KCNJ6	S382R
Gnomad	KCNJ6	L381P
Gnomad	KCNJ6	A377E
Gnomad	KCNJ6	A377T
Gnomad	KCNJ6	E372K
Gnomad	KCNJ6	E369K
Gnomad	KCNJ6	L365F
Gnomad	KCNJ6	S361T
Gnomad	KCNJ6	E348K
Gnomad	KCNJ6	R335Q
Gnomad	KCNJ6	A295T
Gnomad	KCNJ6	I292L
Gnomad	KCNJ6	E291A
Gnomad	KCNJ6	T266M
Gnomad	KCNJ6	Y265H
Gnomad	KCNJ6	P254L
Gnomad	KCNJ6	Q246H
Gnomad	KCNJ6	A239T
Gnomad	KCNJ6	R214Q
Gnomad	KCNJ6	I193L
Gnomad	KCNJ6	I180L
Gnomad	KCNJ6	I168T
Gnomad	KCNJ6	P165L
Gnomad	KCNJ6	V140I
Gnomad	KCNJ6	L136V
Gnomad	KCNJ6	V133D
Gnomad	KCNJ6	W129S
Gnomad	KCNJ6	I124M
Gnomad	KCNJ6	I124R
Gnomad	KCNJ6	G119E
Gnomad	KCNJ6	R118Q
Gnomad	KCNJ6	A115T
Gnomad	KCNJ6	A115S
Gnomad	KCNJ6	I114M
Gnomad	KCNJ6	V97F
Gnomad	KCNJ6	V85M
Gnomad	KCNJ6	R75H
Gnomad	KCNJ6	V70M
Gnomad	KCNJ6	G61R
Gnomad	KCNJ6	I53T
Gnomad	KCNJ6	I53V	Benign	1080222
Gnomad	KCNJ6	R48Q
Gnomad	KCNJ6	R48W
Gnomad	KCNJ6	H43D
Gnomad	KCNJ6	H43Y
Gnomad	KCNJ6	R42S
Gnomad	KCNJ6	R37T
Gnomad	KCNJ6	P33S
Gnomad	KCNJ6	Q29R
Gnomad	KCNJ6	Q29K
Gnomad	KCNJ6	H28L
Gnomad	KCNJ6	I27V
Gnomad	KCNJ6	A26V
Gnomad	KCNJ6	A26S	Uncertain significance	424149
Gnomad	KCNJ6	V25L
Gnomad	KCNJ6	V25M
Gnomad	KCNJ6	E22K
Gnomad	KCNJ6	V21I
Gnomad	KCNJ6	D18V
Gnomad	KCNJ6	M17I
Gnomad	KCNJ6	M17T
Gnomad	KCNJ6	S16P
Gnomad	KCNJ6	D15N
Gnomad	KCNJ6	G14V
Gnomad	KCNJ6	V11I
Gnomad	KCNJ6	T9I
Gnomad	KCNJ6	M8R
Gnomad	KCNJ6	T5A
Gnomad	KCNJ6	K3N
Gnomad	KCNJ8	S422L	Benign	157543
Gnomad	KCNJ8	S422W
Gnomad	KCNJ8	S422A
Gnomad	KCNJ8	Q419E
Gnomad	KCNJ8	M413T
Gnomad	KCNJ8	M406V
Gnomad	KCNJ8	L405P
Gnomad	KCNJ8	L405F
Gnomad	KCNJ8	S403C
Gnomad	KCNJ8	R399Q
Gnomad	KCNJ8	I398M	Benign	691727
Gnomad	KCNJ8	N389S	Uncertain significance	664966
Gnomad	KCNJ8	M386I
Gnomad	KCNJ8	M386K
Gnomad	KCNJ8	R383H
Gnomad	KCNJ8	K382R	Uncertain significance	953104
Gnomad	KCNJ8	N378S
Gnomad	KCNJ8	E357Q
Gnomad	KCNJ8	R356Q
Gnomad	KCNJ8	R352Q
Gnomad	KCNJ8	R352W
Gnomad	KCNJ8	A349V
Gnomad	KCNJ8	V346I	Conflicting interpretations of pathogenicity	449327
Gnomad	KCNJ8	S336C
Gnomad	KCNJ8	V334A	Benign	137998
Gnomad	KCNJ8	G333R
Gnomad	KCNJ8	T329A
Gnomad	KCNJ8	R323C
Gnomad	KCNJ8	A315T
Gnomad	KCNJ8	V292I
Gnomad	KCNJ8	D289E
Gnomad	KCNJ8	D284E
Gnomad	KCNJ8	T283I
Gnomad	KCNJ8	R274H	Uncertain significance	216600
Gnomad	KCNJ8	R274C	Uncertain significance	810767
Gnomad	KCNJ8	V270M
Gnomad	KCNJ8	I266T
Gnomad	KCNJ8	N257S
Gnomad	KCNJ8	S256N
Gnomad	KCNJ8	E255D
Gnomad	KCNJ8	I254V
Gnomad	KCNJ8	N252Y
Gnomad	KCNJ8	D251E
Gnomad	KCNJ8	I243V
Gnomad	KCNJ8	V241I
Gnomad	KCNJ8	T235I
Gnomad	KCNJ8	T234I	Uncertain significance	1037883
Gnomad	KCNJ8	T234A
Gnomad	KCNJ8	R226H
Gnomad	KCNJ8	R226C
Gnomad	KCNJ8	I221T
Gnomad	KCNJ8	R211L
Gnomad	KCNJ8	R211Q
Gnomad	KCNJ8	R202Q
Gnomad	KCNJ8	V201I	Uncertain significance	1026931
Gnomad	KCNJ8	H196R
Gnomad	KCNJ8	R195L
Gnomad	KCNJ8	T181I
Gnomad	KCNJ8	G166A
Gnomad	KCNJ8	G166S
Gnomad	KCNJ8	V165A
Gnomad	KCNJ8	T157M
Gnomad	KCNJ8	L154F
Gnomad	KCNJ8	E150V
Gnomad	KCNJ8	T128I
Gnomad	KCNJ8	T118I	Uncertain significance	431368
Gnomad	KCNJ8	T118S
Gnomad	KCNJ8	T118A
Gnomad	KCNJ8	L115M
Gnomad	KCNJ8	E111G
Gnomad	KCNJ8	E111Q
Gnomad	KCNJ8	M110I
Gnomad	KCNJ8	M110T
Gnomad	KCNJ8	M110L
Gnomad	KCNJ8	G109E
Gnomad	KCNJ8	G109R
Gnomad	KCNJ8	K107E
Gnomad	KCNJ8	E106K
Gnomad	KCNJ8	I101T
Gnomad	KCNJ8	G99E
Gnomad	KCNJ8	G99A
Gnomad	KCNJ8	G99R
Gnomad	KCNJ8	F96V
Gnomad	KCNJ8	A88G	Uncertain significance	190832
Gnomad	KCNJ8	L86H
Gnomad	KCNJ8	R70H
Gnomad	KCNJ8	D59E
Gnomad	KCNJ8	L57P
Gnomad	KCNJ8	E52D
Gnomad	KCNJ8	R51C
Gnomad	KCNJ8	A42T
Gnomad	KCNJ8	S40T
Gnomad	KCNJ8	S40R
Gnomad	KCNJ8	S40C
Gnomad	KCNJ8	R35G
Gnomad	KCNJ8	R30C
Gnomad	KCNJ8	R28P	Uncertain significance	222678
Gnomad	KCNJ8	R28Q
Gnomad	KCNJ8	A19T
Gnomad	KCNJ8	R16L
Gnomad	KCNJ8	R16C
Gnomad	KCNJ9	E4K
Gnomad	KCNJ9	N5K
Gnomad	KCNJ9	G11R
Gnomad	KCNJ9	G11R
Gnomad	KCNJ9	R17Q
Gnomad	KCNJ9	R19S
Gnomad	KCNJ9	R19H
Gnomad	KCNJ9	G20S
Gnomad	KCNJ9	R23S
Gnomad	KCNJ9	R30W
Gnomad	KCNJ9	Q35H
Gnomad	KCNJ9	R39L
Gnomad	KCNJ9	Y42C
Gnomad	KCNJ9	D47H
Gnomad	KCNJ9	L73I
Gnomad	KCNJ9	E90Q
Gnomad	KCNJ9	E90D
Gnomad	KCNJ9	E93G
Gnomad	KCNJ9	D94N
Gnomad	KCNJ9	T95N
Gnomad	KCNJ9	A96S
Gnomad	KCNJ9	N103I
Gnomad	KCNJ9	N105K
Gnomad	KCNJ9	G106S
Gnomad	KCNJ9	A110T
Gnomad	KCNJ9	F111Y
Gnomad	KCNJ9	Q131H
Gnomad	KCNJ9	P133H
Gnomad	KCNJ9	G135V
Gnomad	KCNJ9	V137A
Gnomad	KCNJ9	A143G
Gnomad	KCNJ9	I144V
Gnomad	KCNJ9	V149A
Gnomad	KCNJ9	N150T
Gnomad	KCNJ9	K160R
Gnomad	KCNJ9	I161T
Gnomad	KCNJ9	S162A
Gnomad	KCNJ9	S174Y
Gnomad	KCNJ9	S175L
Gnomad	KCNJ9	G184R
Gnomad	KCNJ9	G184W
Gnomad	KCNJ9	R185H
Gnomad	KCNJ9	R185L
Gnomad	KCNJ9	R191P
Gnomad	KCNJ9	I200M
Gnomad	KCNJ9	R211S
Gnomad	KCNJ9	S212P
Gnomad	KCNJ9	S212L
Gnomad	KCNJ9	P222R
Gnomad	KCNJ9	H224Q
Gnomad	KCNJ9	T226I
Gnomad	KCNJ9	L228V
Gnomad	KCNJ9	P244L
Gnomad	KCNJ9	A254S
Gnomad	KCNJ9	R263P
Gnomad	KCNJ9	R263H
Gnomad	KCNJ9	E266Q
Gnomad	KCNJ9	R267K
Gnomad	KCNJ9	G278D
Gnomad	KCNJ9	R290Q
Gnomad	KCNJ9	T305M
Gnomad	KCNJ9	D312E
Gnomad	KCNJ9	G313S
Gnomad	KCNJ9	E316A
Gnomad	KCNJ9	A320D
Gnomad	KCNJ9	E324K
Gnomad	KCNJ9	E327A
Gnomad	KCNJ9	S332P
Gnomad	KCNJ9	R336Q
Gnomad	KCNJ9	E340K
Gnomad	KCNJ9	A342P
Gnomad	KCNJ9	A343T
Gnomad	KCNJ9	R344C
Gnomad	KCNJ9	R344H
Gnomad	KCNJ9	S355N
Gnomad	KCNJ9	R356W
Gnomad	KCNJ9	R356Q
Gnomad	KCNJ9	E363K
Gnomad	KCNJ9	E364D
Gnomad	KCNJ9	A366G
Gnomad	KCNJ9	A366V
Gnomad	KCNJ9	A366E
Gnomad	KCNJ9	G367R
Gnomad	KCNJ9	A370E
Gnomad	KCNJ9	G372R
Gnomad	KCNJ9	N381I
Gnomad	KCNJ9	E388Q
Gnomad	KCNJ9	E388V
Gnomad	KCNJ9	S389G
Gnomad	KCNJ10	R375H	Uncertain significance	411157
Gnomad	KCNJ10	R375C	Uncertain significance	293118
Gnomad	KCNJ10	S370R
Gnomad	KCNJ10	G369D	Uncertain significance	1039795
Gnomad	KCNJ10	E368D
Gnomad	KCNJ10	E368V
Gnomad	KCNJ10	E368Q	Uncertain significance	470190
Gnomad	KCNJ10	R362K
Gnomad	KCNJ10	S360A
Gnomad	KCNJ10	K354R	Uncertain significance	205824
Gnomad	KCNJ10	P352T	Uncertain significance	578643
Gnomad	KCNJ10	D351E	Uncertain significance	1055860
Gnomad	KCNJ10	D351G
Gnomad	KCNJ10	D351N	Conflicting interpretations of pathogenicity	451985
Gnomad	KCNJ10	G350E
Gnomad	KCNJ10	G350R	Uncertain significance	411159
Gnomad	KCNJ10	Y349C	Uncertain significance	1015917
Gnomad	KCNJ10	R348H	Uncertain significance	205823
Gnomad	KCNJ10	R348C	Conflicting interpretations of pathogenicity	7470
Gnomad	KCNJ10	T346S
Gnomad	KCNJ10	T346A
Gnomad	KCNJ10	S345G	Uncertain significance	1007194
Gnomad	KCNJ10	R343H	Uncertain significance	1052382
Gnomad	KCNJ10	R343C	Uncertain significance	1055010
Gnomad	KCNJ10	S340R
Gnomad	KCNJ10	S338C
Gnomad	KCNJ10	V336A
Gnomad	KCNJ10	V336M	Uncertain significance	426726
Gnomad	KCNJ10	V336L	Uncertain significance	1057513
Gnomad	KCNJ10	V333A	Uncertain significance	205830
Gnomad	KCNJ10	D331H
Gnomad	KCNJ10	S328R
Gnomad	KCNJ10	S328N
Gnomad	KCNJ10	S328G
Gnomad	KCNJ10	F327C
Gnomad	KCNJ10	A325S
Gnomad	KCNJ10	I324T
Gnomad	KCNJ10	A319T
Gnomad	KCNJ10	A314T
Gnomad	KCNJ10	T312I
Gnomad	KCNJ10	T312S
Gnomad	KCNJ10	E310D
Gnomad	KCNJ10	E310K
Gnomad	KCNJ10	E310Q
Gnomad	KCNJ10	G308D
Gnomad	KCNJ10	P302S
Gnomad	KCNJ10	T298A
Gnomad	KCNJ10	R297H
Gnomad	KCNJ10	R297C	Pathogenic	7467
Gnomad	KCNJ10	V296M
Gnomad	KCNJ10	T293I	Uncertain significance	849201
Gnomad	KCNJ10	T286R	Uncertain significance	968911
Gnomad	KCNJ10	T286K
Gnomad	KCNJ10	L279M
Gnomad	KCNJ10	E278Q
Gnomad	KCNJ10	F277S
Gnomad	KCNJ10	E274G
Gnomad	KCNJ10	G273V
Gnomad	KCNJ10	R271H	Conflicting interpretations of pathogenicity	129318
Gnomad	KCNJ10	R271C	Benign	129317
Gnomad	KCNJ10	L268P
Gnomad	KCNJ10	L268I
Gnomad	KCNJ10	E261D	Uncertain significance	659085
Gnomad	KCNJ10	D245E	Conflicting interpretations of pathogenicity	205815
Gnomad	KCNJ10	T242S
Gnomad	KCNJ10	V240A	Uncertain significance	858442
Gnomad	KCNJ10	V240L
Gnomad	KCNJ10	V240I
Gnomad	KCNJ10	V240L
Gnomad	KCNJ10	V236G
Gnomad	KCNJ10	V234I
Gnomad	KCNJ10	R230Q	Uncertain significance	470194
Gnomad	KCNJ10	R230W	Conflicting interpretations of pathogenicity	205821
Gnomad	KCNJ10	T223S
Gnomad	KCNJ10	T220S
Gnomad	KCNJ10	L218F	Uncertain significance	205829
Gnomad	KCNJ10	Q212R
Gnomad	KCNJ10	C211F
Gnomad	KCNJ10	I209T	Pathogenic	692216
Gnomad	KCNJ10	L208I
Gnomad	KCNJ10	R204H
Gnomad	KCNJ10	R204C
Gnomad	KCNJ10	R199Q
Gnomad	KCNJ10	I198S
Gnomad	KCNJ10	P194H	Pathogenic	7469
Gnomad	KCNJ10	S189F
Gnomad	KCNJ10	A185E
Gnomad	KCNJ10	F181L	Uncertain significance	1041315
Gnomad	KCNJ10	R180C
Gnomad	KCNJ10	E177G	Conflicting interpretations of pathogenicity	195165
Gnomad	KCNJ10	E177Q
Gnomad	KCNJ10	R175Q	Uncertain significance	41471
Gnomad	KCNJ10	R175W
Gnomad	KCNJ10	K174T
Gnomad	KCNJ10	R171Q	Pathogenic	656970
Gnomad	KCNJ10	R171W	Uncertain significance	537736
Gnomad	KCNJ10	I169T	Uncertain significance	976160
Gnomad	KCNJ10	A167V	Pathogenic	7466
Gnomad	KCNJ10	F165V
Gnomad	KCNJ10	I156V
Gnomad	KCNJ10	T155I
Gnomad	KCNJ10	T154N
Gnomad	KCNJ10	V145M
Gnomad	KCNJ10	I144V	Uncertain significance	944501
Gnomad	KCNJ10	R134H	Uncertain significance	391946
Gnomad	KCNJ10	I129F
Gnomad	KCNJ10	Q126E
Gnomad	KCNJ10	L123V
Gnomad	KCNJ10	V112G	Uncertain significance	948757
Gnomad	KCNJ10	Q111E
Gnomad	KCNJ10	P107R
Gnomad	KCNJ10	T106N
Gnomad	KCNJ10	P102L	Conflicting interpretations of pathogenicity	411158
Gnomad	KCNJ10	P102T	Uncertain significance	951016
Gnomad	KCNJ10	P101T	Uncertain significance	205827
Gnomad	KCNJ10	D100E	Conflicting interpretations of pathogenicity	435553
Gnomad	KCNJ10	L99P	Uncertain significance	293120
Gnomad	KCNJ10	E98K	Uncertain significance	951015
Gnomad	KCNJ10	E98Q
Gnomad	KCNJ10	L97Q	Uncertain significance	537735
Gnomad	KCNJ10	D95A
Gnomad	KCNJ10	A92V
Gnomad	KCNJ10	A92S	Uncertain significance	435551
Gnomad	KCNJ10	A90V
Gnomad	KCNJ10	V84A
Gnomad	KCNJ10	V84M	Uncertain significance	205819
Gnomad	KCNJ10	G83A
Gnomad	KCNJ10	L81F	Uncertain significance	934084
Gnomad	KCNJ10	F80L
Gnomad	KCNJ10	F80V
Gnomad	KCNJ10	F80L
Gnomad	KCNJ10	G77V
Gnomad	KCNJ10	A73V
Gnomad	KCNJ10	A73T	Uncertain significance	961034
Gnomad	KCNJ10	S72F
Gnomad	KCNJ10	Y66C
Gnomad	KCNJ10	R65H
Gnomad	KCNJ10	R65C	Pathogenic	30251
Gnomad	KCNJ10	I60T	Uncertain significance	205826
Gnomad	KCNJ10	T58I
Gnomad	KCNJ10	L52F
Gnomad	KCNJ10	L50F	Uncertain significance	282077
Gnomad	KCNJ10	R48H
Gnomad	KCNJ10	R48C	Uncertain significance	964546
Gnomad	KCNJ10	D46N	Conflicting interpretations of pathogenicity	239110
Gnomad	KCNJ10	A45T	Uncertain significance	470191
Gnomad	KCNJ10	I44V
Gnomad	KCNJ10	V39M
Gnomad	KCNJ10	R36L
Gnomad	KCNJ10	R36H	Uncertain significance	1053296
Gnomad	KCNJ10	R36C	Uncertain significance	647114
Gnomad	KCNJ10	V30I
Gnomad	KCNJ10	V30F
Gnomad	KCNJ10	R28Q	Uncertain significance	1038534
Gnomad	KCNJ10	R28W
Gnomad	KCNJ10	R27Q	Uncertain significance	1007143
Gnomad	KCNJ10	R27W	Uncertain significance	1058689
Gnomad	KCNJ10	R26Q
Gnomad	KCNJ10	G24E
Gnomad	KCNJ10	G22D
Gnomad	KCNJ10	G22R
Gnomad	KCNJ10	M21I
Gnomad	KCNJ10	M21I
Gnomad	KCNJ10	L20R
Gnomad	KCNJ10	R18Q	Conflicting interpretations of pathogenicity	129316
Gnomad	KCNJ10	R18W	Uncertain significance	205817
Gnomad	KCNJ10	T15P
Gnomad	KCNJ10	Y8C
Gnomad	KCNJ10	V7A	Uncertain significance	1035994
Gnomad	KCNJ10	K6N
Gnomad	KCNJ10	V4A
Gnomad	KCNJ10	V4I	Uncertain significance	435552
Gnomad	KCNJ10	S3P
Gnomad	KCNJ10	T2M
Gnomad	KCNJ11	D387N
Gnomad	KCNJ11	D387H
Gnomad	KCNJ11	P386S
Gnomad	KCNJ11	S385C	Conflicting interpretations of pathogenicity	36430
Gnomad	KCNJ11	S385F
Gnomad	KCNJ11	I384F
Gnomad	KCNJ11	I384L
Gnomad	KCNJ11	K381R
Gnomad	KCNJ11	M375K
Gnomad	KCNJ11	M375V	Uncertain significance	193109
Gnomad	KCNJ11	P374R
Gnomad	KCNJ11	P374S
Gnomad	KCNJ11	V373M	Benign	992023
Gnomad	KCNJ11	V373L
Gnomad	KCNJ11	R371H	Uncertain significance	554088
Gnomad	KCNJ11	R371C
Gnomad	KCNJ11	R369H
Gnomad	KCNJ11	R369L
Gnomad	KCNJ11	R369C	Uncertain significance	992024
Gnomad	KCNJ11	R369S
Gnomad	KCNJ11	P367S
Gnomad	KCNJ11	G366R
Gnomad	KCNJ11	R365H	Uncertain significance	551506
Gnomad	KCNJ11	R365C	Uncertain significance	287827
Gnomad	KCNJ11	S363L
Gnomad	KCNJ11	A362T
Gnomad	KCNJ11	L361F
Gnomad	KCNJ11	T360N
Gnomad	KCNJ11	S354G
Gnomad	KCNJ11	H353R
Gnomad	KCNJ11	H353Y
Gnomad	KCNJ11	D352N
Gnomad	KCNJ11	E351K
Gnomad	KCNJ11	L349P
Gnomad	KCNJ11	L349F
Gnomad	KCNJ11	Q348H	Uncertain significance	917414
Gnomad	KCNJ11	R347H	Uncertain significance	553036
Gnomad	KCNJ11	R347C
Gnomad	KCNJ11	T345M	Conflicting interpretations of pathogenicity	303734
Gnomad	KCNJ11	T345K
Gnomad	KCNJ11	C344Y
Gnomad	KCNJ11	C344F
Gnomad	KCNJ11	V339G	Uncertain significance	550169
Gnomad	KCNJ11	K338N
Gnomad	KCNJ11	V337I	Benign	158670
Gnomad	KCNJ11	S331C
Gnomad	KCNJ11	V328A
Gnomad	KCNJ11	R325P
Gnomad	KCNJ11	R325H
Gnomad	KCNJ11	R325S	Uncertain significance	435560
Gnomad	KCNJ11	R325C
Gnomad	KCNJ11	G324R	Uncertain significance	551025
Gnomad	KCNJ11	D323E
Gnomad	KCNJ11	D323E
Gnomad	KCNJ11	I318V
Gnomad	KCNJ11	P317T
Gnomad	KCNJ11	F315L
Gnomad	KCNJ11	R314H	Uncertain significance	1034248
Gnomad	KCNJ11	R314C
Gnomad	KCNJ11	G312S	Uncertain significance	211231
Gnomad	KCNJ11	D307N
Gnomad	KCNJ11	L305P
Gnomad	KCNJ11	T302I	Uncertain significance	992026
Gnomad	KCNJ11	R301H	Conflicting interpretations of pathogenicity	8683
Gnomad	KCNJ11	R301L
Gnomad	KCNJ11	R301C	Pathogenic	642470
Gnomad	KCNJ11	T294M	Pathogenic	211230
Gnomad	KCNJ11	V290L
Gnomad	KCNJ11	V290M	Pathogenic	435556
Gnomad	KCNJ11	V285I	Uncertain significance	552596
Gnomad	KCNJ11	E282K	Pathogenic	8686
Gnomad	KCNJ11	D274N
Gnomad	KCNJ11	D274Y
Gnomad	KCNJ11	S273G
Gnomad	KCNJ11	L270V	Benign	158685
Gnomad	KCNJ11	L270M
Gnomad	KCNJ11	D269N
Gnomad	KCNJ11	S265I	Uncertain significance	549538
Gnomad	KCNJ11	A263D
Gnomad	KCNJ11	H259R	Pathogenic	8677
Gnomad	KCNJ11	Y258C
Gnomad	KCNJ11	Y258H
Gnomad	KCNJ11	P254L	Pathogenic	8675
Gnomad	KCNJ11	I249V
Gnomad	KCNJ11	G245C
Gnomad	KCNJ11	V244M
Gnomad	KCNJ11	G243S
Gnomad	KCNJ11	M240R	Uncertain significance	284188
Gnomad	KCNJ11	V236G
Gnomad	KCNJ11	V236M
Gnomad	KCNJ11	H234Y
Gnomad	KCNJ11	G228S
Gnomad	KCNJ11	E227K	Pathogenic	158682
Gnomad	KCNJ11	T223S
Gnomad	KCNJ11	T223I
Gnomad	KCNJ11	K222Q
Gnomad	KCNJ11	R221H	Uncertain significance	556784
Gnomad	KCNJ11	R221C
Gnomad	KCNJ11	R221S
Gnomad	KCNJ11	V219L
Gnomad	KCNJ11	V219M
Gnomad	KCNJ11	M217T
Gnomad	KCNJ11	M217L
Gnomad	KCNJ11	M217V
Gnomad	KCNJ11	A213T
Gnomad	KCNJ11	R206C
Gnomad	KCNJ11	V202A
Gnomad	KCNJ11	R195H	Conflicting interpretations of pathogenicity	158681
Gnomad	KCNJ11	R195C
Gnomad	KCNJ11	G194S
Gnomad	KCNJ11	H193R
Gnomad	KCNJ11	R192H	Uncertain significance	552480
Gnomad	KCNJ11	R192L
Gnomad	KCNJ11	R192C
Gnomad	KCNJ11	A190V
Gnomad	KCNJ11	A190T	Conflicting interpretations of pathogenicity	992029
Gnomad	KCNJ11	A178T
Gnomad	KCNJ11	R176H	Uncertain significance	555940
Gnomad	KCNJ11	R176L
Gnomad	KCNJ11	R176C	Uncertain significance	211223
Gnomad	KCNJ11	A172D
Gnomad	KCNJ11	K170E
Gnomad	KCNJ11	G165S
Gnomad	KCNJ11	V155M	Uncertain significance	158675
Gnomad	KCNJ11	Q152H
Gnomad	KCNJ11	V151M	Conflicting interpretations of pathogenicity	877702
Gnomad	KCNJ11	I150T
Gnomad	KCNJ11	L147P	Pathogenic	8665
Gnomad	KCNJ11	I146N
Gnomad	KCNJ11	M137I
Gnomad	KCNJ11	R136L
Gnomad	KCNJ11	R136C	Pathogenic	435558
Gnomad	KCNJ11	G135E
Gnomad	KCNJ11	V127I
Gnomad	KCNJ11	I125L
Gnomad	KCNJ11	F123L
Gnomad	KCNJ11	S119A
Gnomad	KCNJ11	S118L
Gnomad	KCNJ11	H115R
Gnomad	KCNJ11	S113G
Gnomad	KCNJ11	T112A
Gnomad	KCNJ11	P109L
Gnomad	KCNJ11	P109T
Gnomad	KCNJ11	E108K
Gnomad	KCNJ11	E104K
Gnomad	KCNJ11	S103R	Uncertain significance	989944
Gnomad	KCNJ11	P102S
Gnomad	KCNJ11	A101G
Gnomad	KCNJ11	A101D	Uncertain significance	552375
Gnomad	KCNJ11	G98D
Gnomad	KCNJ11	A96T
Gnomad	KCNJ11	A94T
Gnomad	KCNJ11	A87T
Gnomad	KCNJ11	L85H
Gnomad	KCNJ11	L80P
Gnomad	KCNJ11	I74T
Gnomad	KCNJ11	L73F
Gnomad	KCNJ11	L72M
Gnomad	KCNJ11	T71I
Gnomad	KCNJ11	P69T
Gnomad	KCNJ11	W68G
Gnomad	KCNJ11	K67N
Gnomad	KCNJ11	V64L
Gnomad	KCNJ11	T62M	Pathogenic	435559
Gnomad	KCNJ11	F55L
Gnomad	KCNJ11	R54H	Uncertain significance	158673
Gnomad	KCNJ11	R54C	Pathogenic	447634
Gnomad	KCNJ11	R50L
Gnomad	KCNJ11	I49M
Gnomad	KCNJ11	V44M
Gnomad	KCNJ11	C42F
Gnomad	KCNJ11	N41H
Gnomad	KCNJ11	G40S
Gnomad	KCNJ11	S37C
Gnomad	KCNJ11	R34L
Gnomad	KCNJ11	R34H	Pathogenic	1219242
Gnomad	KCNJ11	R34C	Pathogenic	557416
Gnomad	KCNJ11	R31L
Gnomad	KCNJ11	R31Q
Gnomad	KCNJ11	R31W	Uncertain significance	878730
Gnomad	KCNJ11	R29H	Uncertain significance	1303355
Gnomad	KCNJ11	R29C
Gnomad	KCNJ11	A28V	Uncertain significance	1065467
Gnomad	KCNJ11	R27H	Uncertain significance	285043
Gnomad	KCNJ11	R27C	Conflicting interpretations of pathogenicity	211226
Gnomad	KCNJ11	K23E	Benign	8678
Gnomad	KCNJ11	R16H	Uncertain significance	441000
Gnomad	KCNJ11	R16C
Gnomad	KCNJ11	T15I
Gnomad	KCNJ11	V13M
Gnomad	KCNJ11	E10K	Benign	158674
Gnomad	KCNJ11	E10Q	Benign	801368
Gnomad	KCNJ11	I7S
Gnomad	KCNJ11	G6D
Gnomad	KCNJ11	G6S
Gnomad	KCNJ11	R4H
Gnomad	KCNJ11	R4C	Uncertain significance	989948
Gnomad	KCNJ11	R4S	Uncertain significance	193108
Gnomad	KCNJ11	S6R
Gnomad	KCNJ12	A3T
Gnomad	KCNJ12	A3V
Gnomad	KCNJ12	S5T
Gnomad	KCNJ12	R6W
Gnomad	KCNJ12	R6G
Gnomad	KCNJ12	R6Q
Gnomad	KCNJ12	S14A
Gnomad	KCNJ12	S14P
Gnomad	KCNJ12	G19R
Gnomad	KCNJ12	V23L
Gnomad	KCNJ12	V23A
Gnomad	KCNJ12	S26L
Gnomad	KCNJ12	N29K
Gnomad	KCNJ12	G32R
Gnomad	KCNJ12	N33K
Gnomad	KCNJ12	G34S
Gnomad	KCNJ12	T38K
Gnomad	KCNJ12	T38M
Gnomad	KCNJ12	R39W
Gnomad	KCNJ12	R43C
Gnomad	KCNJ12	V47F
Gnomad	KCNJ12	V47I
Gnomad	KCNJ12	G51A
Gnomad	KCNJ12	A58T
Gnomad	KCNJ12	F72S
Gnomad	KCNJ12	T74S
Gnomad	KCNJ12	R79C
Gnomad	KCNJ12	R79P
Gnomad	KCNJ12	R79H
Gnomad	KCNJ12	R81W
Gnomad	KCNJ12	R81L
Gnomad	KCNJ12	R81Q
Gnomad	KCNJ12	M83T
Gnomad	KCNJ12	L92F
Gnomad	KCNJ12	G99R
Gnomad	KCNJ12	G99S
Gnomad	KCNJ12	A106T
Gnomad	KCNJ12	A106E
Gnomad	KCNJ12	A106V
Gnomad	KCNJ12	H109D
Gnomad	KCNJ12	G110V
Gnomad	KCNJ12	D111N
Gnomad	KCNJ12	D111E
Gnomad	KCNJ12	E113D
Gnomad	KCNJ12	P114S
Gnomad	KCNJ12	P114R
Gnomad	KCNJ12	P114L
Gnomad	KCNJ12	A115P
Gnomad	KCNJ12	G117D
Gnomad	KCNJ12	G117A
Gnomad	KCNJ12	G119D
Gnomad	KCNJ12	R120C
Gnomad	KCNJ12	R120S
Gnomad	KCNJ12	R120H
Gnomad	KCNJ12	R120L
Gnomad	KCNJ12	P122S	Uncertain significance	1050773
Gnomad	KCNJ12	C123R
Gnomad	KCNJ12	A133P
Gnomad	KCNJ12	R149C
Gnomad	KCNJ12	C150Y
Gnomad	KCNJ12	T152M
Gnomad	KCNJ12	C155F
Gnomad	KCNJ12	V168M
Gnomad	KCNJ12	G169R
Gnomad	KCNJ12	G169S
Gnomad	KCNJ12	R190W
Gnomad	KCNJ12	R190P
Gnomad	KCNJ12	R190Q
Gnomad	KCNJ12	T193M
Gnomad	KCNJ12	A200S
Gnomad	KCNJ12	A200T
Gnomad	KCNJ12	A200P
Gnomad	KCNJ12	A200V
Gnomad	KCNJ12	A203T
Gnomad	KCNJ12	R205C
Gnomad	KCNJ12	R205G
Gnomad	KCNJ12	R205S
Gnomad	KCNJ12	R214L
Gnomad	KCNJ12	R214H
Gnomad	KCNJ12	G216S
Gnomad	KCNJ12	N217K
Gnomad	KCNJ12	R219S
Gnomad	KCNJ12	R219C
Gnomad	KCNJ12	S221N
Gnomad	KCNJ12	S221I
Gnomad	KCNJ12	R229L
Gnomad	KCNJ12	A230T
Gnomad	KCNJ12	I233F
Gnomad	KCNJ12	I233M
Gnomad	KCNJ12	K234R
Gnomad	KCNJ12	R236W
Gnomad	KCNJ12	G241D
Gnomad	KCNJ12	G241A
Gnomad	KCNJ12	G241V
Gnomad	KCNJ12	I244V
Gnomad	KCNJ12	D250Y
Gnomad	KCNJ12	D250N
Gnomad	KCNJ12	D252N
Gnomad	KCNJ12	G254A
Gnomad	KCNJ12	D256H
Gnomad	KCNJ12	D256Y
Gnomad	KCNJ12	D256N
Gnomad	KCNJ12	A277D
Gnomad	KCNJ12	A277V
Gnomad	KCNJ12	P279L
Gnomad	KCNJ12	F281L
Gnomad	KCNJ12	G282S
Gnomad	KCNJ12	R285W
Gnomad	KCNJ12	R285Q
Gnomad	KCNJ12	R285P
Gnomad	KCNJ12	L288R
Gnomad	KCNJ12	D292Y
Gnomad	KCNJ12	D292G
Gnomad	KCNJ12	D292A
Gnomad	KCNJ12	V296L
Gnomad	KCNJ12	V296M
Gnomad	KCNJ12	G301D
Gnomad	KCNJ12	A307G
Gnomad	KCNJ12	R313C
Gnomad	KCNJ12	R313G
Gnomad	KCNJ12	I321F
Gnomad	KCNJ12	G324S
Gnomad	KCNJ12	R326C
Gnomad	KCNJ12	P329T
Gnomad	KCNJ12	V330L
Gnomad	KCNJ12	V330M
Gnomad	KCNJ12	Q337E
Gnomad	KCNJ12	Y338F
Gnomad	KCNJ12	H346L
Gnomad	KCNJ12	E350K
Gnomad	KCNJ12	E350D
Gnomad	KCNJ12	T354M
Gnomad	KCNJ12	S358I
Gnomad	KCNJ12	S358T
Gnomad	KCNJ12	A359E
Gnomad	KCNJ12	A359V
Gnomad	KCNJ12	V363L
Gnomad	KCNJ12	N365K
Gnomad	KCNJ12	A372G
Gnomad	KCNJ12	C376S
Gnomad	KCNJ12	Y377S
Gnomad	KCNJ12	Y377C
Gnomad	KCNJ12	N379K
Gnomad	KCNJ12	R386H
Gnomad	KCNJ12	R386P
Gnomad	KCNJ12	D387E
Gnomad	KCNJ12	E388Q
Gnomad	KCNJ12	E388K
Gnomad	KCNJ12	A392V
Gnomad	KCNJ12	G398R
Gnomad	KCNJ12	G398S
Gnomad	KCNJ12	R399Q
Gnomad	KCNJ12	S400R
Gnomad	KCNJ12	R401W
Gnomad	KCNJ12	R401P
Gnomad	KCNJ12	R401Q
Gnomad	KCNJ12	D402G
Gnomad	KCNJ12	G403C
Gnomad	KCNJ12	G403S
Gnomad	KCNJ12	P406H
Gnomad	KCNJ12	P406R
Gnomad	KCNJ12	H410Y
Gnomad	KCNJ12	H410N
Gnomad	KCNJ12	H410Q
Gnomad	KCNJ12	D413E
Gnomad	KCNJ12	A417V
Gnomad	KCNJ12	G419S
Gnomad	KCNJ12	G420R
Gnomad	KCNJ12	G420E
Gnomad	KCNJ12	R425W
Gnomad	KCNJ12	R425Q
Gnomad	KCNJ12	Y427D
Gnomad	KCNJ12	R428G
Gnomad	KCNJ12	R429W
Gnomad	KCNJ12	R429P
Gnomad	KCNJ12	R429Q
Gnomad	KCNJ13	T359R
Gnomad	KCNJ13	E355D
Gnomad	KCNJ13	E355G
Gnomad	KCNJ13	Q352H
Gnomad	KCNJ13	I348T	Uncertain significance	1040258
Gnomad	KCNJ13	R336S
Gnomad	KCNJ13	R336K
Gnomad	KCNJ13	P334S
Gnomad	KCNJ13	S333N
Gnomad	KCNJ13	L329V
Gnomad	KCNJ13	P326S
Gnomad	KCNJ13	P323A
Gnomad	KCNJ13	T321A
Gnomad	KCNJ13	F318S
Gnomad	KCNJ13	E316K
Gnomad	KCNJ13	G306V
Gnomad	KCNJ13	R305Q
Gnomad	KCNJ13	L302P	Uncertain significance	844853
Gnomad	KCNJ13	S301Y
Gnomad	KCNJ13	S301T
Gnomad	KCNJ13	A300V
Gnomad	KCNJ13	C298R
Gnomad	KCNJ13	H296Q
Gnomad	KCNJ13	H296Y
Gnomad	KCNJ13	V137I	Uncertain significance	899320
Gnomad	KCNJ13	P290L
Gnomad	KCNJ13	P290A
Gnomad	KCNJ13	P135S
Gnomad	KCNJ13	E131K
Gnomad	KCNJ13	C282Y
Gnomad	KCNJ13	E280K
Gnomad	KCNJ13	G123R
Gnomad	KCNJ13	E276A	Benign	1169670
Gnomad	KCNJ13	M274I
Gnomad	KCNJ13	M274T
Gnomad	KCNJ13	F270S
Gnomad	KCNJ13	F270L
Gnomad	KCNJ13	V268A	Uncertain significance	1023971
Gnomad	KCNJ13	N261H	Uncertain significance	971274
Gnomad	KCNJ13	E260K
Gnomad	KCNJ13	Q258H
Gnomad	KCNJ13	L257F
Gnomad	KCNJ13	P249S
Gnomad	KCNJ13	Y244F
Gnomad	KCNJ13	Y244H
Gnomad	KCNJ13	T242M
Gnomad	KCNJ13	L241Q	Uncertain significance	1025287
Gnomad	KCNJ13	I238F
Gnomad	KCNJ13	F236Y	Uncertain significance	999076
Gnomad	KCNJ13	E233K
Gnomad	KCNJ13	S231F
Gnomad	KCNJ13	S230N	Uncertain significance	335053
Gnomad	KCNJ13	S230I
Gnomad	KCNJ13	G228D
Gnomad	KCNJ13	T220I
Gnomad	KCNJ13	Y218C
Gnomad	KCNJ13	Y218H	Uncertain significance	1043797
Gnomad	KCNJ13	K216N
Gnomad	KCNJ13	K216I
Gnomad	KCNJ13	G215A
Gnomad	KCNJ13	R212S
Gnomad	KCNJ13	Q210R
Gnomad	KCNJ13	Y209H
Gnomad	KCNJ13	L208F
Gnomad	KCNJ13	V207A
Gnomad	KCNJ13	R203W
Gnomad	KCNJ13	P198T
Gnomad	KCNJ13	P196A
Gnomad	KCNJ13	I188T
Gnomad	KCNJ13	L187V
Gnomad	KCNJ13	N186T
Gnomad	KCNJ13	P185L
Gnomad	KCNJ13	D182H
Gnomad	KCNJ13	M181T
Gnomad	KCNJ13	M181V
Gnomad	KCNJ13	V178A
Gnomad	KCNJ13	V177I
Gnomad	KCNJ13	T175I	Benign	335056
Gnomad	KCNJ13	L93F
Gnomad	KCNJ13	R171H
Gnomad	KCNJ13	R171C
Gnomad	KCNJ13	S88G
Gnomad	KCNJ13	R166G
Gnomad	KCNJ13	R162P
Gnomad	KCNJ13	R162Q	Uncertain significance	899321
Gnomad	KCNJ13	R162W	Pathogenic	6585
Gnomad	KCNJ13	I160T	Uncertain significance	1014231
Gnomad	KCNJ13	I160N
Gnomad	KCNJ13	E80K	Conflicting interpretations of pathogenicity	335057
Gnomad	KCNJ13	A158V	Uncertain significance	167203
Gnomad	KCNJ13	A158E
Gnomad	KCNJ13	A158S
Gnomad	KCNJ13	F77L
Gnomad	KCNJ13	C76R
Gnomad	KCNJ13	E149G
Gnomad	KCNJ13	L144P	Uncertain significance	916717
Gnomad	KCNJ13	I140T
Gnomad	KCNJ13	A136V
Gnomad	KCNJ13	A136T
Gnomad	KCNJ13	C131Y
Gnomad	KCNJ13	T124I
Gnomad	KCNJ13	I120T	Pathogenic	191155
Gnomad	KCNJ13	I120V
Gnomad	KCNJ13	Y102C	Uncertain significance	1017594
Gnomad	KCNJ13	I98V
Gnomad	KCNJ13	I98F
Gnomad	KCNJ13	D90G
Gnomad	KCNJ13	G83D
Gnomad	KCNJ13	G83S
Gnomad	KCNJ13	N82I
Gnomad	KCNJ13	V65F
Gnomad	KCNJ13	M57I
Gnomad	KCNJ13	M57T
Gnomad	KCNJ13	M51T
Gnomad	KCNJ13	M51V
Gnomad	KCNJ13	D50V
Gnomad	KCNJ13	M49T
Gnomad	KCNJ13	I47T
Gnomad	KCNJ13	A39G
Gnomad	KCNJ13	L38V
Gnomad	KCNJ13	R36G
Gnomad	KCNJ13	A34S
Gnomad	KCNJ13	M31I
Gnomad	KCNJ13	L29F
Gnomad	KCNJ13	G25D
Gnomad	KCNJ13	D24Y
Gnomad	KCNJ13	R18Q	Uncertain significance	842121
Gnomad	KCNJ13	R18W
Gnomad	KCNJ13	Y17H
Gnomad	KCNJ13	R16K
Gnomad	KCNJ13	I9M	Uncertain significance	866179
Gnomad	KCNJ13	I9T
Gnomad	KCNJ13	V8L	Uncertain significance	953725
Gnomad	KCNJ13	K7N
Gnomad	KCNJ13	K7R
Gnomad	KCNJ13	C6S
Gnomad	KCNJ14	R5S
Gnomad	KCNJ14	A6V
Gnomad	KCNJ14	L10V
Gnomad	KCNJ14	L10F
Gnomad	KCNJ14	D18G
Gnomad	KCNJ14	S19N
Gnomad	KCNJ14	S19I
Gnomad	KCNJ14	R20W
Gnomad	KCNJ14	A21V
Gnomad	KCNJ14	E24K
Gnomad	KCNJ14	G28R
Gnomad	KCNJ14	G30R
Gnomad	KCNJ14	G30A
Gnomad	KCNJ14	L31M
Gnomad	KCNJ14	R33S
Gnomad	KCNJ14	R33H
Gnomad	KCNJ14	A37G
Gnomad	KCNJ14	A39G
Gnomad	KCNJ14	V41M
Gnomad	KCNJ14	P44S
Gnomad	KCNJ14	V45M
Gnomad	KCNJ14	R47Q
Gnomad	KCNJ14	R47P
Gnomad	KCNJ14	V53L
Gnomad	KCNJ14	K54T
Gnomad	KCNJ14	K55E
Gnomad	KCNJ14	D56E
Gnomad	KCNJ14	R62C
Gnomad	KCNJ14	R62H
Gnomad	KCNJ14	F63C
Gnomad	KCNJ14	V64I
Gnomad	KCNJ14	N65I
Gnomad	KCNJ14	G67S
Gnomad	KCNJ14	G68A
Gnomad	KCNJ14	G70D
Gnomad	KCNJ14	A71T
Gnomad	KCNJ14	R72C
Gnomad	KCNJ14	R72H
Gnomad	KCNJ14	L74V
Gnomad	KCNJ14	S75T
Gnomad	KCNJ14	S75N
Gnomad	KCNJ14	D76E
Gnomad	KCNJ14	L77P
Gnomad	KCNJ14	T80A
Gnomad	KCNJ14	C81R
Gnomad	KCNJ14	C81G
Gnomad	KCNJ14	D83Y
Gnomad	KCNJ14	V84M
Gnomad	KCNJ14	V84L
Gnomad	KCNJ14	R87H
Gnomad	KCNJ14	W88C
Gnomad	KCNJ14	W88C
Gnomad	KCNJ14	M89I
Gnomad	KCNJ14	L92P
Gnomad	KCNJ14	C95F
Gnomad	KCNJ14	C95S
Gnomad	KCNJ14	S96A
Gnomad	KCNJ14	S96F
Gnomad	KCNJ14	W101R
Gnomad	KCNJ14	L102P
Gnomad	KCNJ14	G105S
Gnomad	KCNJ14	F108L
Gnomad	KCNJ14	W109R
Gnomad	KCNJ14	I111F
Gnomad	KCNJ14	I111V
Gnomad	KCNJ14	I111T
Gnomad	KCNJ14	A112V
Gnomad	KCNJ14	L114V
Gnomad	KCNJ14	L114R
Gnomad	KCNJ14	H115Q
Gnomad	KCNJ14	G116S
Gnomad	KCNJ14	G116R
Gnomad	KCNJ14	D117H
Gnomad	KCNJ14	L118V
Gnomad	KCNJ14	A119T
Gnomad	KCNJ14	A119P
Gnomad	KCNJ14	A120T
Gnomad	KCNJ14	A120G
Gnomad	KCNJ14	P121L
Gnomad	KCNJ14	P121R
Gnomad	KCNJ14	P123S
Gnomad	KCNJ14	P124L
Gnomad	KCNJ14	A125P
Gnomad	KCNJ14	F128L
Gnomad	KCNJ14	S129L
Gnomad	KCNJ14	H130Y
Gnomad	KCNJ14	H130P
Gnomad	KCNJ14	V131M
Gnomad	KCNJ14	A137S
Gnomad	KCNJ14	F138L
Gnomad	KCNJ14	L139H
Gnomad	KCNJ14	A141T
Gnomad	KCNJ14	E143Q
Gnomad	KCNJ14	T144M
Gnomad	KCNJ14	S147Y
Gnomad	KCNJ14	G149A
Gnomad	KCNJ14	Y150H
Gnomad	KCNJ14	R153S
Gnomad	KCNJ14	R153H
Gnomad	KCNJ14	V155I
Gnomad	KCNJ14	E158K
Gnomad	KCNJ14	A161D
Gnomad	KCNJ14	A162V
Gnomad	KCNJ14	A165T
Gnomad	KCNJ14	A165V
Gnomad	KCNJ14	V166A
Gnomad	KCNJ14	I171M
Gnomad	KCNJ14	G173S
Gnomad	KCNJ14	V175M
Gnomad	KCNJ14	V180A
Gnomad	KCNJ14	A186T
Gnomad	KCNJ14	A189D
Gnomad	KCNJ14	K190R
Gnomad	KCNJ14	K193R
Gnomad	KCNJ14	R194H
Gnomad	KCNJ14	N195K
Gnomad	KCNJ14	E196K
Gnomad	KCNJ14	E196A
Gnomad	KCNJ14	L198V
Gnomad	KCNJ14	L198Q
Gnomad	KCNJ14	V199I
Gnomad	KCNJ14	F200S
Gnomad	KCNJ14	S201R
Gnomad	KCNJ14	V205I
Gnomad	KCNJ14	A207V
Gnomad	KCNJ14	H211Y
Gnomad	KCNJ14	R212C
Gnomad	KCNJ14	C214R
Gnomad	KCNJ14	L215V
Gnomad	KCNJ14	M216L
Gnomad	KCNJ14	W217L
Gnomad	KCNJ14	G220D
Gnomad	KCNJ14	L222V
Gnomad	KCNJ14	L222M
Gnomad	KCNJ14	R223S
Gnomad	KCNJ14	V228L
Gnomad	KCNJ14	A230T
Gnomad	KCNJ14	A230D
Gnomad	KCNJ14	A230V
Gnomad	KCNJ14	H231Q
Gnomad	KCNJ14	R233C
Gnomad	KCNJ14	A234S
Gnomad	KCNJ14	L236V
Gnomad	KCNJ14	P239T
Gnomad	KCNJ14	R240H
Gnomad	KCNJ14	T242N
Gnomad	KCNJ14	E244K
Gnomad	KCNJ14	G245D
Gnomad	KCNJ14	E246G
Gnomad	KCNJ14	Y247H
Gnomad	KCNJ14	Y247C
Gnomad	KCNJ14	P249L
Gnomad	KCNJ14	D254E
Gnomad	KCNJ14	V255M
Gnomad	KCNJ14	G258A
Gnomad	KCNJ14	G258D
Gnomad	KCNJ14	G261R
Gnomad	KCNJ14	G262S
Gnomad	KCNJ14	T263I
Gnomad	KCNJ14	T263N
Gnomad	KCNJ14	D264N
Gnomad	KCNJ14	R265C
Gnomad	KCNJ14	I266V
Gnomad	KCNJ14	L268F
Gnomad	KCNJ14	L268V
Gnomad	KCNJ14	V269L
Gnomad	KCNJ14	V269M
Gnomad	KCNJ14	S270F
Gnomad	KCNJ14	P271S
Gnomad	KCNJ14	P271R
Gnomad	KCNJ14	P271L
Gnomad	KCNJ14	I272V
Gnomad	KCNJ14	T273S
Gnomad	KCNJ14	I274T
Gnomad	KCNJ14	V275I
Gnomad	KCNJ14	E277D
Gnomad	KCNJ14	I278M
Gnomad	KCNJ14	D279N
Gnomad	KCNJ14	A281V
Gnomad	KCNJ14	S282G
Gnomad	KCNJ14	R289C
Gnomad	KCNJ14	R289H
Gnomad	KCNJ14	E291K
Gnomad	KCNJ14	E291V
Gnomad	KCNJ14	L292R
Gnomad	KCNJ14	A295D
Gnomad	KCNJ14	F297S
Gnomad	KCNJ14	L303V
Gnomad	KCNJ14	V307A
Gnomad	KCNJ14	A311V
Gnomad	KCNJ14	M312I
Gnomad	KCNJ14	T313A
Gnomad	KCNJ14	T313N
Gnomad	KCNJ14	R317S
Gnomad	KCNJ14	R317H
Gnomad	KCNJ14	S318P
Gnomad	KCNJ14	S318L
Gnomad	KCNJ14	S319P
Gnomad	KCNJ14	Y320C
Gnomad	KCNJ14	L321F
Gnomad	KCNJ14	E324K
Gnomad	KCNJ14	R330C
Gnomad	KCNJ14	R330S
Gnomad	KCNJ14	R330H
Gnomad	KCNJ14	R330L
Gnomad	KCNJ14	E332K
Gnomad	KCNJ14	P333A
Gnomad	KCNJ14	V334I
Gnomad	KCNJ14	V334A
Gnomad	KCNJ14	L335P
[truncated: 529 more rows]
