# Supplementary material for: Determinants of trafficking, conduction, and disease within a K+ channel revealed through multiparametric deep mutational scanning
Source: eLife journal article supplement (doi:10.7554/elife.76903), 2022-05-31
Supplement: supp [file minor_comparison.xlsx]

## Sheet: Sheet1
position	mutation	minor_count	wt_resid
87	V	4	I
87	F	2	I
87	S	2	I
87	L	1	I
87	M	1	I
87	N	1	I
88	I	15	F
88	L	13	F
88	V	9	F
88	S	6	F
88	C	5	F
88	Y	3	F
88	P	1	F
88	T	1	F
89	S	10	C
89	W	4	C
89	F	3	C
89	G	2	C
89	R	1	C
90	F	3	L
90	V	2	L
90	I	1	L
90	T	1	L
90	H	1	L
91	S	8	A
91	T	8	A
91	G	4	A
91	V	4	A
91	D	2	A
91	C	1	A
91	L	1	A
92	Y	4	F
92	S	3	F
93	G	2	V
93	A	2	V
94	V	8	L
94	I	3	L
94	F	2	L
94	P	2	L
94	M	1	L
94	H	1	L
95	A	2	S
95	T	1	S
95	P	1	S
97	F	2	L
97	C	1	L
97	I	1	L
97	V	1	L
97	M	1	L
98	L	21	F
98	S	13	F
98	C	7	F
98	I	5	F
98	V	4	F
99	C	1	F
100	A	8	G
100	T	1	G
101	F	17	C
101	S	6	C
101	G	2	C
101	W	2	C
101	L	1	C
102	A	4	V
102	G	2	V
102	I	1	V
103	Y	7	F
103	V	4	F
103	L	1	F
103	C	1	F
103	T	1	F
104	C	5	W
104	L	3	W
105	F	6	L
105	V	4	L
105	M	3	L
105	S	1	L
106	T	4	I
106	V	3	I
106	M	2	I
106	L	1	I
106	F	1	I
107	G	1	A
107		1	A
108	M	4	L
108	Q	3	L
108	R	3	L
108	K	1	L
108	V	1	L
165	T	1	A
165	V	1	A
166	I	7	V
166	A	1	V
166	S	1	V
166	C	1	V
167	I	16	F
167	L	10	F
167	V	4	F
167	C	4	F
167	S	3	F
167	M	1	F
167	T	1	F
168	V	5	M
168	L	3	M
168	T	3	M
168	I	1	M
169	L	2	V
170	L	4	V
170	I	2	V
171	L	6	F
171	V	5	F
171	S	4	F
171	I	3	F
172	E	7	Q
172	L	1	Q
172	I	1	Q
173	W	6	S
173	A	4	S
173	T	4	S
173	F	2	S
173	Y	2	S
173	C	1	S
173	E	1	S
173	L	1	S
174	L	10	I
174	F	6	I
174	V	4	I
174	M	4	I
174	Y	1	I
174	T	1	I
#REF!	L	15	V
#REF!	I	3	V
#REF!	G	3	V
#REF!	F	1	V
#REF!	E	1	V
#REF!	S	3	G
#REF!	C	2	G
#REF!	W	4	C
#REF!	Y	4	C
#REF!	R	4	C
#REF!	F	3	C
#REF!	S	2	C
#REF!	N	1	C
#REF!	L	4	I
#REF!	M	3	I
#REF!	F	2	I
#REF!	S	2	I
#REF!	T	2	I
#REF!	V	1	I
#REF!	F	4	I
#REF!	L	3	I
#REF!	M	2	I
#REF!	T	2	I
#REF!	S	1	I
#REF!	N	1	I
#REF!	N	7	D
#REF!	E	5	D
#REF!	A	2	D
#REF!	G	2	D
#REF!	H	2	D
#REF!	Y	1	D
#REF!	V	3	D
#REF!	S	1	D
#REF!	G	5	A
#REF!	T	5	A
#REF!	S	3	A
#REF!	P	2	A
#REF!	V	1	A
#REF!	E	1	A
#REF!	L	6	F
#REF!	S	3	F
#REF!	V	2	F
#REF!	Y	1	F
#REF!	I	1	F
#REF!	C	1	F
#REF!	D	1	F
#REF!	L	8	I
#REF!	V	6	I
#REF!	T	6	I
#REF!	S	4	I
#REF!	F	3	I
#REF!	M	3	I
#REF!	N	1	I
#REF!	M	7	I
#REF!	V	6	I
#REF!	S	6	I
#REF!	T	5	I
#REF!	L	3	I
#REF!	N	1	I
#REF!	K	1	I
#REF!	E	7	G
#REF!	A	3	G
#REF!	R	2	G
#REF!	Q	1	G
#REF!	F	1	G
#REF!	V	1	G
#REF!	T	9	A
#REF!	P	5	A
#REF!	S	3	A
#REF!	V	3	A
#REF!	G	1	A
