# Supplementary material for: Determinants of trafficking, conduction, and disease within a K+ channel revealed through multiparametric deep mutational scanning
Source: eLife journal article supplement (doi:10.7554/elife.76903), 2022-05-31
Supplement: supp [file sutcliffe_comp.xlsx]

## Sheet: Sheet1
position	mutation	wt_resid	ag_block	label
147	C	T	-0.9	T139C
148	C	Q	1.3	Q140C
149	C	T	16.7	T141C
150	C	T	13.4	T142C
151	C	I	21.1	I143C
152	C	G	0.3	G144C
153	C	Y	19.8	Y145C
154	C	G	-1.6	G146C
155	C	F	25.7	F147C
156	C	R	0	R148C
