# Supplementary material for: Determinants of trafficking, conduction, and disease within a K+ channel revealed through multiparametric deep mutational scanning
Source: eLife journal article supplement (doi:10.7554/elife.76903), 2022-05-31
Supplement: supp [file welling_comparison.xlsx]

## Sheet: Sheet1
position_kir21	position	mutation	welling_surface_score	label
44	44	A	0.693333	R44A
45	45	A	0.666667	S45A
46	46	A	0.333333	R46A
47	47	A	0.516667	F47A
48	48	A	0.683333	V48A
49	49	A	0.783333	K49A
50	50	A	0.7	K50A
51	51	A	1.11667	D51A
314	322	A	0.727273	S314A
315	323	A	1.18182	Y315A
316	324	A	0.872727	L316A
318	326	A	1.09091	N318A
319	327	A	0.109091	E319A
320	328	A	0.03	I320A
321	329	A	1.27273	L321A
322	330	A	0.0336364	W322A
323	331	A	1.49091	G323A
