# Supplementary material for: Determinants of trafficking, conduction, and disease within a K+ channel revealed through multiparametric deep mutational scanning
Source: eLife. 2022 May 31;11:e76903. doi: 10.7554/eLife.76903 (PMC9273215; doi:10.7554/eLife.76903)
Supplement: Supplementary file 1. — Inward rectifier variants listed in ClinVar and gnomAD along with their expert-reviewed clinical significance (if any). For variants in genes other than KCNJ2 (i.e., KCNJx), the corresponding Kir2.1 residue, Kir2.1-Flag residue, and amino are listed (‘kir21_resno,’ ‘kir21_FLAG_resno,’ ‘kir21_resid,’ respectively). If the residue in KCNJx is equivalent to KCNJ2, the ‘KCNJx_eq_KCNJ2’ column is flagged ‘1,’ and ‘0’ if the residue is different. [file elife-76903-supp1.csv]

Supplementary File 1: Inward Rectifier Missense Variants in ClinVar and Gnomad (as of 3/25/2022)
Variant ID		Running Counter
Gene		Gene name
Mutation		Mutation
Source		Source Database
Clinical Significance		Expert Interpretation of Variant
ClinVar_ID		ClinVar ID
Condition		Variant-associated Disorder
Kir21_resno		Corresponding Residue Number in KCNJ2 (Kir2.1)
Kir21_resid		Corresponding Amino Acid in KCNJ2 (Kir2.1)
kir21_FLAG_resno		Corresponding Residue Number in KCNJ2 (Kir2.1) with FLAG tag inserted at T115
KCNJx_eq_KCNJ2		Equivalent / Aligned Residue Position and Amino Acid in KCNJx and KCNJ2 (1 = True; 0 = False)
Variant ID	Gene	Mutation	Source	Clinical_Significance	ClinVar_ID	Condition	kir21_resno	kir21_resid	kir21_FLAG_resno	KCNJx_eq_KCNJ2
1	KCNJ1	A103V	Gnomad only	NA	NA	NA	107	A	107	1
2	KCNJ1	A177S	Gnomad only	NA	NA	NA	178	A	186	1
3	KCNJ1	A180T	Gnomad only	NA	NA	NA	181	A	189	1
4	KCNJ1	A198T	Clinvar only	Pathogenic	NA	Bartter syndrome, type 2, antenatal	199	A	207	1
5	KCNJ1	A198V	Gnomad only	NA	NA	NA	199	A	207	1
6	KCNJ1	A214G	Clinvar only	Uncertain significance	NA	not provided	215	G	223	0
7	KCNJ1	A214T	Gnomad only	NA	NA	NA	215	G	223	0
8	KCNJ1	A214V	Clinvar & Gnomad	Pathogenic	9157	Bartter syndrome, type 2, antenatal	215	G	223	0
9	KCNJ1	A255T	Clinvar & Gnomad	Uncertain significance	879617	Bartter syndrome, type 2, antenatal	256	S	264	0
10	KCNJ1	A282E	Gnomad only	NA	NA	NA	283	S	291	0
11	KCNJ1	A282G	Gnomad only	NA	NA	NA	283	S	291	0
12	KCNJ1	A283T	Gnomad only	NA	NA	NA	284	K	292	0
13	KCNJ1	A283V	Gnomad only	NA	NA	NA	284	K	292	0
14	KCNJ1	A306V	Clinvar & Gnomad	Uncertain significance	1053514	not provided	307	M	315	0
15	KCNJ1	A326D	Gnomad only	NA	NA	NA	327	E	335	0
16	KCNJ1	A326S	Gnomad only	NA	NA	NA	327	E	335	0
17	KCNJ1	A326T	Gnomad only	NA	NA	NA	327	E	335	0
18	KCNJ1	A356D	Gnomad only	NA	NA	NA	357	S	365	0
19	KCNJ1	A367D	Gnomad only	NA	NA	NA	384	S	392	0
20	KCNJ1	A3V	Gnomad only	NA	NA	NA	NA	-	NA	0
21	KCNJ1	A87D	Gnomad only	NA	NA	NA	91	A	91	1
22	KCNJ1	A87V	Gnomad only	NA	NA	NA	91	A	91	1
23	KCNJ1	C121Y	Clinvar only	Uncertain significance	NA	not provided	122	C	130	1
24	KCNJ1	C208S	Gnomad only	NA	NA	NA	209	C	217	1
25	KCNJ1	C49R	Gnomad only	NA	NA	NA	54	C	54	1
26	KCNJ1	C49Y	Clinvar & Gnomad	Uncertain significance	978165	Intellectual disability|Seizures	54	C	54	1
27	KCNJ1	D108E	Gnomad only	NA	NA	NA	112	D	112	1
28	KCNJ1	D108G	Gnomad only	NA	NA	NA	112	D	112	1
29	KCNJ1	D108H	Clinvar only	Pathogenic	NA	Bartter syndrome, type 2, antenatal	112	D	112	1
30	KCNJ1	D245E	Gnomad only	NA	NA	NA	246	D	254	1
31	KCNJ1	D254G	Gnomad only	NA	NA	NA	255	D	263	1
32	KCNJ1	D254H	Gnomad only	NA	NA	NA	255	D	263	1
33	KCNJ1	D340G	Gnomad only	NA	NA	NA	340	D	348	1
34	KCNJ1	D364A	Gnomad only	NA	NA	NA	381	A	389	0
35	KCNJ1	D364G	Clinvar & Gnomad	Uncertain significance	235615	not provided	381	A	389	0
36	KCNJ1	D46G	Gnomad only	NA	NA	NA	51	D	51	1
37	KCNJ1	D46N	Gnomad only	NA	NA	NA	51	D	51	1
38	KCNJ1	D74A	Gnomad only	NA	NA	NA	78	D	78	1
39	KCNJ1	E118D	Clinvar only	Uncertain significance	NA	not provided	NA	-	NA	0
40	KCNJ1	E240D	Gnomad only	NA	NA	NA	241	E	249	1
41	KCNJ1	E318D	Gnomad only	NA	NA	NA	319	E	327	1
42	KCNJ1	E351A	Gnomad only	NA	NA	NA	351	P	359	0
43	KCNJ1	E362A	Clinvar only	Uncertain significance	NA	not provided	379	E	387	1
44	KCNJ1	E362K	Clinvar only	Uncertain significance	NA	not provided	379	E	387	1
45	KCNJ1	E362V	Gnomad only	NA	NA	NA	379	E	387	1
46	KCNJ1	E52A	Clinvar only	Uncertain significance	NA	not provided	57	Q	57	0
47	KCNJ1	E52K	Gnomad only	NA	NA	NA	57	Q	57	0
48	KCNJ1	E57K	Gnomad only	NA	NA	NA	62	G	62	0
49	KCNJ1	F132L	Gnomad only	NA	NA	NA	133	F	141	1
50	KCNJ1	F132L	Gnomad only	NA	NA	NA	133	F	141	1
51	KCNJ1	F132S	Gnomad only	NA	NA	NA	133	F	141	1
52	KCNJ1	F173L	Gnomad only	NA	NA	NA	174	F	182	1
53	KCNJ1	F279S	Gnomad only	NA	NA	NA	280	Y	288	0
54	KCNJ1	F296L	Gnomad only	NA	NA	NA	297	I	305	0
55	KCNJ1	F32C	Gnomad only	NA	NA	NA	29	G	29	0
56	KCNJ1	F32S	Gnomad only	NA	NA	NA	29	G	29	0
57	KCNJ1	F344L	Gnomad only	NA	NA	NA	344	F	352	1
58	KCNJ1	F344V	Gnomad only	NA	NA	NA	344	F	352	1
59	KCNJ1	F378L	Clinvar only	Uncertain significance	NA	not provided	414	V	422	0
60	KCNJ1	F88C	Gnomad only	NA	NA	NA	92	F	92	1
61	KCNJ1	F93S	Gnomad only	NA	NA	NA	97	L	97	0
62	KCNJ1	F93V	Gnomad only	NA	NA	NA	97	L	97	0
63	KCNJ1	G127D	Gnomad only	NA	NA	NA	128	S	136	0
64	KCNJ1	G127S	Gnomad only	NA	NA	NA	128	S	136	0
65	KCNJ1	G167E	Clinvar & Gnomad	Pathogenic	9160	Bartter syndrome, type 2, antenatal	168	G	176	1
66	KCNJ1	G205R	Gnomad only	NA	NA	NA	206	G	214	1
67	KCNJ1	G223D	Gnomad only	NA	NA	NA	224	E	232	0
68	KCNJ1	G223R	Gnomad only	NA	NA	NA	224	E	232	0
69	KCNJ1	G228E	Clinvar & Gnomad	Uncertain significance	631654	Bartter syndrome, type 2, antenatal	229	A	237	0
70	KCNJ1	G228V	Gnomad only	NA	NA	NA	229	A	237	0
71	KCNJ1	G299S	Gnomad only	NA	NA	NA	300	G	308	1
72	KCNJ1	G322D	Gnomad only	NA	NA	NA	323	G	331	1
73	KCNJ1	G322S	Gnomad only	NA	NA	NA	323	G	331	1
74	KCNJ1	G335R	Clinvar only	Uncertain significance	NA	Bartter syndrome, type 2, antenatal	335	H	343	0
75	KCNJ1	G372S	Gnomad only	NA	NA	NA	389	D	397	0
76	KCNJ1	G47E	Gnomad only	NA	NA	NA	52	G	52	1
77	KCNJ1	G90R	Gnomad only	NA	NA	NA	94	L	94	0
78	KCNJ1	H118R	Gnomad only	NA	NA	NA	NA	-	NA	0
79	KCNJ1	H118Y	Gnomad only	NA	NA	NA	NA	-	NA	0
80	KCNJ1	H280Y	Gnomad only	NA	NA	NA	281	D	289	0
81	KCNJ1	H342Y	Gnomad only	NA	NA	NA	342	S	350	0
82	KCNJ1	H35R	Gnomad only	NA	NA	NA	32	N	32	0
83	KCNJ1	I157T	Gnomad only	NA	NA	NA	158	V	166	0
84	KCNJ1	I165T	Gnomad only	NA	NA	NA	166	I	174	1
85	KCNJ1	I169V	Gnomad only	NA	NA	NA	170	I	178	1
86	KCNJ1	I170V	Gnomad only	NA	NA	NA	171	I	179	1
87	KCNJ1	I211L	Gnomad only	NA	NA	NA	212	W	220	0
88	KCNJ1	I222T	Gnomad only	NA	NA	NA	223	V	231	0
89	KCNJ1	I226M	Gnomad only	NA	NA	NA	227	V	235	0
90	KCNJ1	I242V	Gnomad only	NA	NA	NA	243	I	251	1
91	KCNJ1	I247T	Gnomad only	NA	NA	NA	248	I	256	1
92	KCNJ1	I263V	Gnomad only	NA	NA	NA	264	V	272	0
93	KCNJ1	I272F	Gnomad only	NA	NA	NA	273	I	281	1
94	KCNJ1	I272T	Gnomad only	NA	NA	NA	273	I	281	1
95	KCNJ1	I272V	Gnomad only	NA	NA	NA	273	I	281	1
96	KCNJ1	I51T	Gnomad only	NA	NA	NA	56	V	56	0
97	KCNJ1	I63V	Gnomad only	NA	NA	NA	67	R	67	0
98	KCNJ1	I68V	Gnomad only	NA	NA	NA	72	I	72	1
99	KCNJ1	I85N	Gnomad only	NA	NA	NA	89	C	89	0
100	KCNJ1	K107E	Clinvar & Gnomad	Uncertain significance	64392	not provided|Bartter syndrome, type 2, antenatal	111	G	111	0
101	KCNJ1	K186E	Gnomad only	NA	NA	NA	187	K	195	1
102	KCNJ1	K186N	Gnomad only	NA	NA	NA	187	K	195	1
103	KCNJ1	K196N	Gnomad only	NA	NA	NA	197	H	205	0
104	KCNJ1	K202E	Gnomad only	NA	NA	NA	203	M	211	0
105	KCNJ1	K206N	Gnomad only	NA	NA	NA	207	K	215	1
106	KCNJ1	K331E	Gnomad only	NA	NA	NA	332	E	340	0
107	KCNJ1	K336E	Gnomad only	NA	NA	NA	336	Y	344	0
108	KCNJ1	K363T	Gnomad only	NA	NA	NA	380	V	388	0
109	KCNJ1	K370E	Gnomad only	NA	NA	NA	387	E	395	0
110	KCNJ1	K390T	Gnomad only	NA	NA	NA	426	E	434	0
111	KCNJ1	K45E	Gnomad only	NA	NA	NA	50	K	50	1
112	KCNJ1	K76E	Gnomad only	NA	NA	NA	80	R	80	0
113	KCNJ1	K76N	Gnomad only	NA	NA	NA	80	R	80	0
114	KCNJ1	L109F	Gnomad only	NA	NA	NA	113	L	113	1
115	KCNJ1	L109I	Gnomad only	NA	NA	NA	113	L	113	1
116	KCNJ1	L128S	Gnomad only	NA	NA	NA	129	F	137	0
117	KCNJ1	L159M	Gnomad only	NA	NA	NA	160	M	168	0
118	KCNJ1	L207F	Clinvar only	Benign	NA	not provided|Bartter syndrome, type 2, antenatal	208	L	216	1
119	KCNJ1	L209F	Gnomad only	NA	303574	NA	210	L	218	1
120	KCNJ1	L220F	Clinvar & Gnomad	Pathogenic	872043	Bartter syndrome, type 2, antenatal|not provided	221	H	229	0
121	KCNJ1	L220R	Clinvar & Gnomad	Pathogenic	870375	Bartter syndrome, type 2, antenatal	221	H	229	0
122	KCNJ1	L230F	Gnomad only	NA	NA	NA	231	L	239	1
123	KCNJ1	L24V	Gnomad only	NA	NA	NA	21	L	21	1
124	KCNJ1	L286V	Gnomad only	NA	NA	NA	287	I	295	0
125	KCNJ1	L320I	Gnomad only	NA	NA	NA	321	L	329	1
126	KCNJ1	L320P	Clinvar only	Uncertain significance	NA	not provided	321	L	329	1
127	KCNJ1	L320V	Gnomad only	NA	NA	NA	321	L	329	1
128	KCNJ1	L359R	Gnomad only	NA	NA	NA	376	Y	384	0
129	KCNJ1	L380F	Gnomad only	NA	NA	NA	416	L	424	1
130	KCNJ1	L380F	Gnomad only	NA	NA	NA	416	L	424	1
131	KCNJ1	M174I	Gnomad only	NA	NA	NA	175	I	183	0
132	KCNJ1	M174I	Gnomad only	NA	NA	NA	175	I	183	0
133	KCNJ1	M174T	Gnomad only	NA	NA	NA	175	I	183	0
134	KCNJ1	M357I	Gnomad only	NA	NA	NA	374	F	382	0
135	KCNJ1	M357T	Clinvar & Gnomad	Benign	9158	Bartter syndrome, type 2, antenatal|not specified|not provided	374	F	382	0
136	KCNJ1	M369I	Gnomad only	NA	NA	NA	386	E	394	0
137	KCNJ1	M391I	Clinvar & Gnomad	Uncertain significance	935618	not provided	427	I	435	0
138	KCNJ1	N117S	Gnomad only	NA	NA	NA	NA	-	NA	0
139	KCNJ1	N124K	Clinvar only	Pathogenic	NA	Bartter syndrome, type 2, antenatal	125	E	133	0
140	KCNJ1	N197D	Gnomad only	NA	NA	NA	198	N	206	1
141	KCNJ1	N197K	Gnomad only	NA	NA	NA	198	N	206	1
142	KCNJ1	N215D	Gnomad only	NA	NA	NA	216	N	224	1
143	KCNJ1	N250D	Gnomad only	NA	NA	NA	251	N	259	1
144	KCNJ1	N250S	Gnomad only	NA	NA	NA	251	N	259	1
145	KCNJ1	N259T	Clinvar only	Uncertain significance	NA	not provided	260	R	268	0
146	KCNJ1	N275S	Gnomad only	NA	NA	NA	276	D	284	0
147	KCNJ1	N343H	Gnomad only	NA	NA	NA	343	R	351	0
148	KCNJ1	N361K	Gnomad only	NA	NA	NA	378	N	386	1
149	KCNJ1	N377K	Gnomad only	NA	NA	NA	413	S	421	0
150	KCNJ1	N384I	Clinvar & Gnomad	Uncertain significance	161825	Malignant tumor of prostate	420	P	428	0
151	KCNJ1	N55K	Gnomad only	NA	NA	NA	60	N	60	1
152	KCNJ1	P110L	Clinvar & Gnomad	Pathogenic	981532	Bartter syndrome, type 2, antenatal	114	D	114	0
153	KCNJ1	P110Q	Gnomad only	NA	NA	NA	114	D	114	0
154	KCNJ1	P114L	Gnomad only	NA	NA	NA	118	E	126	0
155	KCNJ1	P185L	Gnomad only	NA	NA	NA	186	P	194	1
156	KCNJ1	P185S	Gnomad only	NA	NA	NA	186	P	194	1
157	KCNJ1	P265L	Gnomad only	NA	NA	NA	266	P	274	1
158	KCNJ1	P265S	Gnomad only	NA	NA	NA	266	P	274	1
159	KCNJ1	P277R	Gnomad only	NA	NA	NA	278	P	286	1
160	KCNJ1	P316A	Gnomad only	NA	NA	NA	317	A	325	0
161	KCNJ1	P316L	Gnomad only	NA	NA	NA	317	A	325	0
162	KCNJ1	P327L	Clinvar & Gnomad	Uncertain significance	303569	Bartter syndrome, type 2, antenatal	328	P	336	1
163	KCNJ1	P353S	Clinvar only	Uncertain significance	NA	not provided	354	P	362	1
164	KCNJ1	P376L	Gnomad only	NA	NA	NA	412	A	420	0
165	KCNJ1	Q152H	Gnomad only	NA	NA	NA	153	E	161	0
166	KCNJ1	Q163P	Gnomad only	NA	NA	NA	164	Q	172	1
167	KCNJ1	R14G	Gnomad only	NA	NA	NA	11	I	11	0
168	KCNJ1	R184G	Gnomad only	NA	NA	NA	185	K	193	0
169	KCNJ1	R184Q	Clinvar only	Pathogenic	NA	Bartter syndrome, type 2, antenatal	185	K	193	0
170	KCNJ1	R184W	Clinvar only	Pathogenic	NA	Bartter syndrome, type 2, antenatal	185	K	193	0
171	KCNJ1	R188C	Clinvar & Gnomad	Conflicting interpretations of pathogenicity	225398	not specified|Bartter syndrome, type 2, antenatal	189	R	197	1
172	KCNJ1	R188H	Gnomad only	NA	NA	NA	189	R	197	1
173	KCNJ1	R188S	Clinvar & Gnomad	Uncertain significance	1011893	not provided	189	R	197	1
174	KCNJ1	R203W	Gnomad only	NA	NA	NA	204	R	212	1
175	KCNJ1	R212P	Clinvar & Gnomad	Uncertain significance	845433	not provided	213	R	221	1
176	KCNJ1	R212Q	Gnomad only	NA	NA	NA	213	R	221	1
177	KCNJ1	R217K	Gnomad only	NA	NA	NA	218	R	226	1
178	KCNJ1	R25Q	Clinvar & Gnomad	Conflicting interpretations of pathogenicity	303577	not provided|Bartter syndrome, type 2, antenatal	22	A	22	0
179	KCNJ1	R25W	Gnomad only	NA	NA	NA	22	A	22	0
180	KCNJ1	R311Q	Gnomad only	NA	NA	NA	312	R	320	1
181	KCNJ1	R311W	Gnomad only	NA	NA	NA	312	R	320	1
182	KCNJ1	R31C	Gnomad only	NA	NA	NA	28	N	28	0
183	KCNJ1	R31H	Clinvar & Gnomad	Conflicting interpretations of pathogenicity	303576	not provided|Bartter syndrome, type 2, antenatal	28	N	28	0
184	KCNJ1	R31L	Gnomad only	NA	NA	NA	28	N	28	0
185	KCNJ1	R324C	Gnomad only	NA	NA	NA	325	R	333	1
186	KCNJ1	R324H	Gnomad only	NA	NA	NA	325	R	333	1
187	KCNJ1	R324P	Gnomad only	NA	NA	NA	325	R	333	1
188	KCNJ1	R338Q	Gnomad only	NA	NA	NA	338	K	346	0
189	KCNJ1	R366G	Gnomad only	NA	NA	NA	383	T	391	0
190	KCNJ1	R366T	Gnomad only	NA	NA	NA	383	T	391	0
191	KCNJ1	R368G	Gnomad only	NA	NA	NA	385	K	393	0
192	KCNJ1	R371T	Gnomad only	NA	NA	NA	388	D	396	0
193	KCNJ1	R37Q	Gnomad only	NA	NA	NA	42	Q	42	0
194	KCNJ1	R37W	Gnomad only	NA	NA	NA	42	Q	42	0
195	KCNJ1	R41M	Gnomad only	NA	NA	NA	46	R	46	1
196	KCNJ1	R61K	Gnomad only	NA	NA	NA	NA	-	NA	0
197	KCNJ1	R6Q	Gnomad only	NA	NA	NA	3	S	3	0
198	KCNJ1	R6W	Clinvar & Gnomad	Uncertain significance	834322	not provided|Bartter syndrome, type 2, antenatal	3	S	3	0
199	KCNJ1	S164P	Gnomad only	NA	NA	NA	165	S	173	1
200	KCNJ1	S19N	Gnomad only	NA	NA	NA	16	E	16	0
201	KCNJ1	S219R	Clinvar & Gnomad	Pathogenic	9155	Bartter syndrome, type 2, antenatal	220	S	228	1
202	KCNJ1	S224N	Gnomad only	NA	NA	NA	225	A	233	0
203	KCNJ1	S264P	Gnomad only	NA	NA	NA	265	S	273	1
204	KCNJ1	S305C	Gnomad only	NA	NA	NA	306	A	314	0
205	KCNJ1	S313F	Gnomad only	NA	NA	NA	314	S	322	1
206	KCNJ1	S330F	Gnomad only	NA	NA	NA	331	F	339	0
207	KCNJ1	S345N	Gnomad only	NA	NA	NA	345	H	353	0
208	KCNJ1	S4F	Gnomad only	NA	NA	NA	1	M	1	0
209	KCNJ1	S91T	Gnomad only	NA	NA	NA	95	S	95	1
210	KCNJ1	T119A	Gnomad only	NA	NA	NA	NA	-	NA	0
211	KCNJ1	T11A	Gnomad only	NA	NA	NA	8	R	8	0
212	KCNJ1	T11M	Gnomad only	NA	NA	NA	8	R	8	0
213	KCNJ1	T129A	Gnomad only	NA	NA	NA	130	T	138	1
214	KCNJ1	T129I	Gnomad only	NA	NA	NA	130	T	138	1
215	KCNJ1	T141A	Gnomad only	NA	NA	NA	142	T	150	1
216	KCNJ1	T141I	Gnomad only	NA	NA	NA	142	T	150	1
217	KCNJ1	T141S	Gnomad only	NA	NA	NA	142	T	150	1
218	KCNJ1	T150R	Gnomad only	NA	NA	NA	151	T	159	1
219	KCNJ1	T17A	Gnomad only	NA	NA	NA	14	S	14	0
220	KCNJ1	T191M	Clinvar only	Benign	NA	Bartter syndrome, type 2, antenatal	192	T	200	1
221	KCNJ1	T193M	Gnomad only	NA	879618	NA	194	V	202	0
222	KCNJ1	T234I	Clinvar only	Uncertain significance	NA	not provided	235	R	243	0
223	KCNJ1	T236A	Gnomad only	NA	NA	NA	237	T	245	1
224	KCNJ1	T241I	Gnomad only	NA	NA	NA	242	Y	250	0
225	KCNJ1	T285A	Gnomad only	NA	NA	NA	286	D	294	0
226	KCNJ1	T300A	Gnomad only	NA	NA	NA	301	M	309	0
227	KCNJ1	T300I	Clinvar & Gnomad	Uncertain significance	878156	Bartter syndrome, type 2, antenatal	301	M	309	0
228	KCNJ1	T300R	Clinvar & Gnomad	Uncertain significance	988597	Bartter syndrome, type 2, antenatal	301	M	309	0
229	KCNJ1	T307A	Gnomad only	NA	NA	NA	308	T	316	1
230	KCNJ1	T307I	Gnomad only	NA	NA	NA	308	T	316	1
231	KCNJ1	T30P	Gnomad only	NA	NA	NA	27	A	27	0
232	KCNJ1	T332K	Gnomad only	NA	NA	NA	NA	-	NA	0
233	KCNJ1	T347A	Gnomad only	NA	NA	NA	347	T	355	1
234	KCNJ1	T70I	Gnomad only	NA	NA	NA	74	T	74	1
235	KCNJ1	T71M	Clinvar & Gnomad	Uncertain significance	631655	Bartter syndrome, type 2, antenatal	75	T	75	1
236	KCNJ1	T86A	Clinvar & Gnomad	Benign	235236	Antenatal Bartter Syndrome|not provided	90	L	90	0
237	KCNJ1	V102G	Gnomad only	NA	NA	NA	106	I	106	0
238	KCNJ1	V122A	Gnomad only	NA	NA	NA	123	V	131	1
239	KCNJ1	V122E	Gnomad only	NA	NA	NA	123	V	131	1
240	KCNJ1	V15L	Gnomad only	NA	NA	NA	12	V	12	1
241	KCNJ1	V15M	Gnomad only	NA	NA	NA	12	V	12	1
242	KCNJ1	V213G	Gnomad only	NA	NA	NA	214	V	222	1
243	KCNJ1	V213M	Gnomad only	NA	NA	NA	214	V	222	1
244	KCNJ1	V235A	Gnomad only	NA	NA	NA	236	I	244	0
245	KCNJ1	V271I	Gnomad only	NA	NA	NA	272	E	280	0
246	KCNJ1	V28I	Gnomad only	NA	NA	NA	25	A	25	0
247	KCNJ1	V295A	Gnomad only	NA	NA	NA	296	V	304	1
248	KCNJ1	V29I	Gnomad only	NA	NA	NA	26	V	26	1
249	KCNJ1	V301M	Gnomad only	NA	NA	NA	302	V	310	1
250	KCNJ1	V315G	Gnomad only	NA	NA	NA	316	L	324	0
251	KCNJ1	V319L	Gnomad only	NA	NA	NA	320	I	328	0
252	KCNJ1	V365I	Gnomad only	NA	NA	NA	382	L	390	0
253	KCNJ1	V383L	Gnomad only	NA	NA	NA	419	R	427	0
254	KCNJ1	V72A	Gnomad only	NA	NA	NA	76	C	76	0
255	KCNJ1	W69G	Gnomad only	NA	NA	NA	73	F	73	0
256	KCNJ1	W69S	Gnomad only	NA	NA	NA	73	F	73	0
257	KCNJ1	W99C	Gnomad only	NA	NA	NA	103	F	103	0
258	KCNJ1	W99R	Gnomad only	NA	NA	NA	103	F	103	0
259	KCNJ1	Y100C	Clinvar & Gnomad	Uncertain significance	64391	not provided	104	W	104	0
260	KCNJ1	Y227C	Clinvar only	Uncertain significance	NA	not provided	228	R	236	0
261	KCNJ1	Y314C	Gnomad only	NA	NA	NA	315	Y	323	1
262	KCNJ1	Y314S	Gnomad only	NA	NA	NA	315	Y	323	1
263	KCNJ1	Y323C	Gnomad only	NA	NA	NA	324	H	332	0
264	KCNJ1	Y337C	Gnomad only	NA	NA	NA	337	Y	345	1
265	KCNJ1	Y373C	Gnomad only	NA	NA	NA	390	S	398	0
266	KCNJ10	A143T	Clinvar only	Uncertain significance	NA	not provided	157	A	165	1
267	KCNJ10	A167V	Clinvar & Gnomad	Pathogenic	7466	Pendred syndrome|EAST syndrome|Deafness, autosomal recessive 4, with enlarged vestibular aqueduct|EAST syndrome	181	A	189	1
268	KCNJ10	A185E	Gnomad only	NA	NA	NA	199	A	207	1
269	KCNJ10	A201T	Clinvar only	Pathogenic	NA	SeSAME-like syndrome	215	G	223	0
270	KCNJ10	A314T	Gnomad only	NA	NA	NA	329	V	337	0
271	KCNJ10	A319T	Gnomad only	NA	NA	NA	333	E	341	0
272	KCNJ10	A325S	Gnomad only	NA	NA	NA	339	V	347	0
273	KCNJ10	A45T	Clinvar & Gnomad	Uncertain significance	470191	EAST syndrome|not provided	62	G	62	0
274	KCNJ10	A73T	Clinvar & Gnomad	Uncertain significance	961034	EAST syndrome	90	L	90	0
275	KCNJ10	A73V	Gnomad only	NA	NA	NA	90	L	90	0
276	KCNJ10	A90V	Gnomad only	NA	NA	NA	107	A	107	1
277	KCNJ10	A92S	Clinvar & Gnomad	Uncertain significance	435551	EAST syndrome|not specified	109	L	109	0
278	KCNJ10	A92V	Gnomad only	NA	NA	NA	109	L	109	0
279	KCNJ10	C140R	Clinvar only	Pathogenic	NA	EAST syndrome	154	C	162	1
280	KCNJ10	C211F	Gnomad only	NA	NA	NA	225	A	233	0
281	KCNJ10	D100E	Clinvar & Gnomad	Conflicting interpretations of pathogenicity	435553	not specified|not provided|EAST syndrome	117	K	125	0
282	KCNJ10	D245E	Clinvar & Gnomad	Conflicting interpretations of pathogenicity	205815	EAST syndrome|Deafness, autosomal recessive 4, with enlarged vestibular aqueduct|not specified|not provided	259	D	267	1
283	KCNJ10	D331H	Gnomad only	NA	NA	NA	345	H	353	0
284	KCNJ10	D344G	Clinvar only	Uncertain significance	NA	not provided	377	E	385	0
285	KCNJ10	D351E	Clinvar & Gnomad	Uncertain significance	1055860	EAST syndrome	384	S	392	0
286	KCNJ10	D351G	Gnomad only	NA	NA	NA	384	S	392	0
287	KCNJ10	D351N	Clinvar & Gnomad	Conflicting interpretations of pathogenicity	451985	not provided|Deafness, autosomal recessive 4, with enlarged vestibular aqueduct|Pendred syndrome|EAST syndrome|EAST syndrome|Intellectual disability	384	S	392	0
288	KCNJ10	D46N	Clinvar & Gnomad	Conflicting interpretations of pathogenicity	239110	History of neurodevelopmental disorder|not specified|not provided|EAST syndrome|Deafness, autosomal recessive 4, with enlarged vestibular aqueduct|Intellectual disability|Seizures	63	E	63	0
289	KCNJ10	D95A	Gnomad only	NA	NA	NA	112	D	112	1
290	KCNJ10	E177G	Clinvar & Gnomad	Conflicting interpretations of pathogenicity	195165	not provided|Deafness, autosomal recessive 4, with enlarged vestibular aqueduct|EAST syndrome|Deafness, autosomal recessive 4, with enlarged vestibular aqueduct|EAST syndrome	191	E	199	1
291	KCNJ10	E177Q	Gnomad only	NA	NA	NA	191	E	199	1
292	KCNJ10	E261D	Clinvar & Gnomad	Uncertain significance	659085	EAST syndrome	275	E	283	1
293	KCNJ10	E274G	Gnomad only	NA	NA	NA	289	N	297	0
294	KCNJ10	E278Q	Gnomad only	NA	NA	NA	293	E	301	1
295	KCNJ10	E310D	Gnomad only	NA	NA	NA	325	R	333	0
296	KCNJ10	E310K	Gnomad only	NA	NA	NA	325	R	333	0
297	KCNJ10	E310Q	Gnomad only	NA	NA	NA	325	R	333	0
298	KCNJ10	E368D	Gnomad only	NA	NA	NA	413	S	421	0
299	KCNJ10	E368Q	Clinvar & Gnomad	Uncertain significance	470190	EAST syndrome	413	S	421	0
300	KCNJ10	E368V	Gnomad only	NA	NA	NA	413	S	421	0
301	KCNJ10	E42K	Clinvar only	Uncertain significance	NA	not provided	59	I	59	0
302	KCNJ10	E98K	Clinvar & Gnomad	Uncertain significance	951015	EAST syndrome	115	A	115	0
303	KCNJ10	E98Q	Gnomad only	NA	NA	NA	115	A	115	0
304	KCNJ10	F160Y	Clinvar only	Uncertain significance	NA	EAST syndrome	174	F	182	1
305	KCNJ10	F165V	Gnomad only	NA	NA	NA	179	V	187	0
306	KCNJ10	F181L	Clinvar & Gnomad	Uncertain significance	1041315	EAST syndrome	195	F	203	1
307	KCNJ10	F277S	Gnomad only	NA	NA	NA	292	F	300	1
308	KCNJ10	F327C	Gnomad only	NA	NA	NA	341	Y	349	0
309	KCNJ10	F75L	Clinvar only	Pathogenic	NA	EAST syndrome	92	F	92	1
310	KCNJ10	F80L	Gnomad only	NA	NA	NA	97	L	97	0
311	KCNJ10	F80L	Gnomad only	NA	NA	NA	97	L	97	0
312	KCNJ10	F80V	Gnomad only	NA	NA	NA	97	L	97	0
313	KCNJ10	G132S	Clinvar only	Uncertain significance	NA	not provided	146	G	154	1
314	KCNJ10	G22D	Gnomad only	NA	NA	NA	23	T	23	0
315	KCNJ10	G22R	Gnomad only	NA	NA	NA	23	T	23	0
316	KCNJ10	G24E	Gnomad only	NA	NA	NA	41	Q	41	0
317	KCNJ10	G273C	Clinvar only	Uncertain significance	NA	EAST syndrome	288	D	296	0
318	KCNJ10	G273V	Gnomad only	NA	NA	NA	288	D	296	0
319	KCNJ10	G308D	Gnomad only	NA	NA	NA	323	G	331	1
320	KCNJ10	G308R	Clinvar only	Uncertain significance	NA	not specified	323	G	331	1
321	KCNJ10	G341R	Clinvar only	Uncertain significance	NA	not provided	374	F	382	0
322	KCNJ10	G350A	Clinvar only	Uncertain significance	NA	EAST syndrome	383	T	391	0
323	KCNJ10	G350E	Gnomad only	NA	NA	NA	383	T	391	0
324	KCNJ10	G350R	Clinvar & Gnomad	Uncertain significance	411159	EAST syndrome	383	T	391	0
325	KCNJ10	G369D	Clinvar & Gnomad	Uncertain significance	1039795	EAST syndrome	414	V	422	0
326	KCNJ10	G77R	Clinvar only	Pathogenic	NA	EAST syndrome	94	L	94	0
327	KCNJ10	G77V	Gnomad only	NA	NA	NA	94	L	94	0
328	KCNJ10	G83A	Gnomad only	NA	NA	NA	100	G	100	1
329	KCNJ10	H257D	Clinvar only	Uncertain significance	NA	EAST syndrome	271	H	279	1
330	KCNJ10	H93L	Clinvar only	Uncertain significance	NA	EAST syndrome	110	H	110	1
331	KCNJ10	H93R	Clinvar only	Uncertain significance	NA	EAST syndrome	110	H	110	1
332	KCNJ10	I129F	Gnomad only	NA	NA	NA	143	I	151	1
333	KCNJ10	I129V	Clinvar only	Uncertain significance	NA	EAST syndrome	143	I	151	1
334	KCNJ10	I144V	Clinvar & Gnomad	Uncertain significance	944501	EAST syndrome	158	V	166	0
335	KCNJ10	I156V	Gnomad only	NA	NA	NA	170	I	178	1
336	KCNJ10	I169T	Clinvar & Gnomad	Uncertain significance	976160	EAST syndrome	183	M	191	0
337	KCNJ10	I179N	Clinvar only	Uncertain significance	NA	EAST syndrome	193	L	201	0
338	KCNJ10	I198S	Gnomad only	NA	NA	NA	212	W	220	0
339	KCNJ10	I209T	Clinvar & Gnomad	Pathogenic	692216	SeSAME-like syndrome	223	V	231	0
340	KCNJ10	I229F	Clinvar only	Uncertain significance	NA	not provided	243	I	251	1
341	KCNJ10	I229V	Clinvar only	Uncertain significance	NA	not provided|EAST syndrome	243	I	251	1
342	KCNJ10	I282N	Clinvar only	Uncertain significance	NA	EAST syndrome	297	I	305	1
343	KCNJ10	I324T	Gnomad only	NA	NA	NA	338	K	346	0
344	KCNJ10	I44V	Gnomad only	NA	NA	NA	61	V	61	0
345	KCNJ10	I60T	Clinvar & Gnomad	Uncertain significance	205826	not provided|EAST syndrome|History of neurodevelopmental disorder	77	V	77	0
346	KCNJ10	K174T	Gnomad only	NA	NA	NA	188	K	196	1
347	KCNJ10	K354R	Clinvar & Gnomad	Uncertain significance	205824	not provided|EAST syndrome|Deafness, autosomal recessive 4, with enlarged vestibular aqueduct|Nonsyndromic Hearing Loss, Recessive	387	E	395	0
348	KCNJ10	K6N	Gnomad only	NA	NA	NA	7	N	7	0
349	KCNJ10	L123V	Gnomad only	NA	NA	NA	137	I	145	0
350	KCNJ10	L142V	Clinvar only	Uncertain significance	NA	EAST syndrome	156	I	164	0
351	KCNJ10	L146F	Clinvar only	Uncertain significance	NA	EAST syndrome	160	M	168	0
352	KCNJ10	L151M	Clinvar only	Uncertain significance	NA	EAST syndrome	165	S	173	0
353	KCNJ10	L208F	Clinvar only	Uncertain significance	NA	EAST syndrome	222	L	230	1
354	KCNJ10	L208I	Gnomad only	NA	NA	NA	222	L	230	1
355	KCNJ10	L20R	Gnomad only	NA	NA	NA	21	L	21	1
356	KCNJ10	L218F	Clinvar & Gnomad	Uncertain significance	205829	Deafness, autosomal recessive 4, with enlarged vestibular aqueduct|EAST syndrome|Pendred syndrome|EAST syndrome|Deafness, autosomal recessive 4, with enlarged vestibular aqueduct|not specified	232	L	240	1
357	KCNJ10	L268I	Gnomad only	NA	NA	NA	282	L	290	1
358	KCNJ10	L268P	Gnomad only	NA	NA	NA	282	L	290	1
359	KCNJ10	L279M	Gnomad only	NA	NA	NA	294	I	302	0
360	KCNJ10	L50F	Clinvar & Gnomad	Uncertain significance	282077	EAST syndrome|not provided|Deafness, autosomal recessive 4, with enlarged vestibular aqueduct	67	R	67	0
361	KCNJ10	L52F	Gnomad only	NA	NA	NA	69	L	69	1
362	KCNJ10	L70F	Clinvar only	Uncertain significance	NA	EAST syndrome	87	I	87	0
363	KCNJ10	L81F	Clinvar & Gnomad	Uncertain significance	934084	EAST syndrome	98	F	98	0
364	KCNJ10	L97Q	Clinvar & Gnomad	Uncertain significance	537735	EAST syndrome	114	D	114	0
365	KCNJ10	L99P	Clinvar & Gnomad	Uncertain significance	293120	not provided|Deafness, autosomal recessive 4, with enlarged vestibular aqueduct|EAST syndrome	116	S	124	0
366	KCNJ10	M1V	Clinvar only	Uncertain significance	NA	EAST syndrome	2	G	2	0
367	KCNJ10	M21I	Gnomad only	NA	NA	NA	22	A	22	0
368	KCNJ10	M21I	Gnomad only	NA	NA	NA	22	A	22	0
369	KCNJ10	M21T	Clinvar only	Uncertain significance	NA	EAST syndrome	22	A	22	0
370	KCNJ10	N232D	Clinvar only	Uncertain significance	NA	EAST syndrome	246	D	254	0
371	KCNJ10	N38D	Clinvar only	Uncertain significance	NA	not provided	55	N	55	1
372	KCNJ10	P101L	Clinvar only	Uncertain significance	NA	EAST syndrome	118	E	126	0
373	KCNJ10	P101S	Clinvar only	Uncertain significance	NA	EAST syndrome	118	E	126	0
374	KCNJ10	P101T	Clinvar & Gnomad	Uncertain significance	205827	Deafness, autosomal recessive 4, with enlarged vestibular aqueduct|EAST syndrome|EAST syndrome|Deafness, autosomal recessive 4, with enlarged vestibular aqueduct|not specified	118	E	126	0
375	KCNJ10	P102L	Clinvar & Gnomad	Conflicting interpretations of pathogenicity	411158	not provided|EAST syndrome	119	G	127	0
376	KCNJ10	P102T	Clinvar & Gnomad	Uncertain significance	951016	EAST syndrome	119	G	127	0
377	KCNJ10	P107R	Gnomad only	NA	NA	NA	121	A	129	0
378	KCNJ10	P194H	Clinvar & Gnomad	Pathogenic	7469	Deafness, autosomal recessive 4, with enlarged vestibular aqueduct	208	L	216	0
379	KCNJ10	P252R	Clinvar only	Pathogenic	NA	Abnormality of the nervous system	266	P	274	1
380	KCNJ10	P302S	Gnomad only	NA	NA	NA	317	A	325	0
381	KCNJ10	P313S	Clinvar only	Uncertain significance	NA	not provided	328	P	336	1
382	KCNJ10	P339S	Clinvar only	Uncertain significance	NA	EAST syndrome	354	P	362	1
383	KCNJ10	P339T	Clinvar only	Uncertain significance	NA	EAST syndrome	354	P	362	1
384	KCNJ10	P352T	Clinvar & Gnomad	Uncertain significance	578643	EAST syndrome	385	K	393	0
385	KCNJ10	Q111E	Clinvar & Gnomad	Uncertain significance	NA	not provided	125	E	133	0
386	KCNJ10	Q126E	Gnomad only	NA	NA	NA	140	Q	148	1
387	KCNJ10	Q212R	Gnomad only	NA	NA	NA	226	H	234	0
388	KCNJ10	Q332E	Clinvar only	Uncertain significance	NA	not provided	346	K	354	0
389	KCNJ10	R134H	Clinvar & Gnomad	Uncertain significance	391946	not provided|EAST syndrome	148	R	156	1
390	KCNJ10	R134S	Clinvar only	Pathogenic	NA	EAST syndrome	148	R	156	1
391	KCNJ10	R171Q	Clinvar & Gnomad	Pathogenic	656970	EAST syndrome	185	K	193	0
392	KCNJ10	R171W	Clinvar & Gnomad	Uncertain significance	537736	Pendred syndrome|Deafness, autosomal recessive 4, with enlarged vestibular aqueduct|EAST syndrome|EAST syndrome	185	K	193	0
393	KCNJ10	R175Q	Clinvar & Gnomad	Conflicting interpretations of pathogenicity	41471	not provided|EAST syndrome	189	R	197	1
394	KCNJ10	R175W	Gnomad only	NA	NA	NA	189	R	197	1
395	KCNJ10	R180C	Gnomad only	NA	NA	NA	194	V	202	0
396	KCNJ10	R180H	Clinvar only	Uncertain significance	NA	not provided	194	V	202	0
397	KCNJ10	R18Q	Clinvar & Gnomad	Conflicting interpretations of pathogenicity	129316	History of neurodevelopmental disorder|not specified|not provided|EAST syndrome|Seizures|Autistic disorder|Intellectual disability	19	M	19	0
398	KCNJ10	R18W	Clinvar & Gnomad	Uncertain significance	205817	EAST syndrome|not provided|Deafness, autosomal recessive 4, with enlarged vestibular aqueduct|History of neurodevelopmental disorder	19	M	19	0
399	KCNJ10	R199Q	Gnomad only	NA	NA	NA	213	R	221	1
400	KCNJ10	R204C	Gnomad only	NA	NA	NA	218	R	226	1
401	KCNJ10	R204H	Gnomad only	NA	NA	NA	218	R	226	1
402	KCNJ10	R230Q	Clinvar & Gnomad	Uncertain significance	470194	EAST syndrome	244	P	252	0
403	KCNJ10	R230W	Clinvar & Gnomad	Conflicting interpretations of pathogenicity	205821	EAST syndrome|not provided	244	P	252	0
404	KCNJ10	R26Q	Gnomad only	NA	NA	NA	43	C	43	0
405	KCNJ10	R271C	Clinvar & Gnomad	Benign	129317	not specified|EAST syndrome|Deafness, autosomal recessive 4, with enlarged vestibular aqueduct|History of neurodevelopmental disorder	285	Q	293	0
406	KCNJ10	R271H	Clinvar & Gnomad	Conflicting interpretations of pathogenicity	129318	History of neurodevelopmental disorder|not specified|not provided|EAST syndrome|Deafness, autosomal recessive 4, with enlarged vestibular aqueduct	285	Q	293	0
407	KCNJ10	R27Q	Clinvar & Gnomad	Uncertain significance	1007143	EAST syndrome	44	R	44	1
408	KCNJ10	R27W	Clinvar & Gnomad	Uncertain significance	1058689	EAST syndrome	44	R	44	1
409	KCNJ10	R28Q	Clinvar & Gnomad	Uncertain significance	1038534	EAST syndrome	45	S	45	0
410	KCNJ10	R28W	Gnomad only	NA	NA	NA	45	S	45	0
411	KCNJ10	R297C	Clinvar & Gnomad	Pathogenic	7467	EAST syndrome|not provided	312	R	320	1
412	KCNJ10	R297H	Gnomad only	NA	NA	NA	312	R	320	1
413	KCNJ10	R343C	Clinvar & Gnomad	Uncertain significance	1055010	not provided|EAST syndrome	376	Y	384	0
414	KCNJ10	R343H	Clinvar & Gnomad	Uncertain significance	1052382	EAST syndrome	376	Y	384	0
415	KCNJ10	R348C	Clinvar & Gnomad	Conflicting interpretations of pathogenicity	7470	KCNJ10-Related Disorders|not specified|not provided|EAST syndrome|Deafness, autosomal recessive 4, with enlarged vestibular aqueduct	381	A	389	0
416	KCNJ10	R348H	Clinvar & Gnomad	Uncertain significance	205823	not specified|not provided|Intellectual disability|Deafness, autosomal recessive 4, with enlarged vestibular aqueduct|History of neurodevelopmental disorder|Deafness, autosomal recessive 4, with enlarged vestibular aqueduct|EAST syndrome|Pendred syndrome|EAST syndrome	381	A	389	0
417	KCNJ10	R362K	Gnomad only	NA	NA	NA	407	D	415	0
418	KCNJ10	R36C	Clinvar & Gnomad	Uncertain significance	647114	EAST syndrome	53	H	53	0
419	KCNJ10	R36H	Clinvar & Gnomad	Uncertain significance	1053296	EAST syndrome	53	H	53	0
420	KCNJ10	R36L	Gnomad only	NA	NA	NA	53	H	53	0
421	KCNJ10	R375C	Clinvar & Gnomad	Uncertain significance	293118	not provided|Deafness, autosomal recessive 4, with enlarged vestibular aqueduct|EAST syndrome	420	P	428	0
422	KCNJ10	R375H	Clinvar & Gnomad	Uncertain significance	411157	History of neurodevelopmental disorder|EAST syndrome	420	P	428	0
423	KCNJ10	R48C	Clinvar & Gnomad	Uncertain significance	964546	EAST syndrome|not provided	65	G	65	0
424	KCNJ10	R48H	Gnomad only	NA	NA	NA	65	G	65	0
425	KCNJ10	R48P	Clinvar only	Uncertain significance	NA	EAST syndrome	65	G	65	0
426	KCNJ10	R65C	Clinvar & Gnomad	Pathogenic	30251	EAST syndrome	82	R	82	1
427	KCNJ10	R65H	Gnomad only	NA	NA	NA	82	R	82	1
428	KCNJ10	R65P	Clinvar only	Pathogenic	NA	Renal tubular dysfunction|Bilateral sensorineural hearing impairment|Cerebellar ataxia|Spastic diplegia|Microcephaly|EAST syndrome	82	R	82	1
429	KCNJ10	S189F	Gnomad only	NA	NA	NA	203	M	211	0
430	KCNJ10	S328G	Gnomad only	NA	NA	NA	342	S	350	1
431	KCNJ10	S328N	Gnomad only	NA	NA	NA	342	S	350	1
432	KCNJ10	S328R	Gnomad only	NA	NA	NA	342	S	350	1
433	KCNJ10	S338A	Clinvar only	Uncertain significance	NA	EAST syndrome	353	T	361	0
434	KCNJ10	S338C	Gnomad only	NA	NA	NA	353	T	361	0
435	KCNJ10	S340R	Gnomad only	NA	NA	NA	373	S	381	1
436	KCNJ10	S345G	Clinvar & Gnomad	Uncertain significance	1007194	EAST syndrome	378	N	386	0
437	KCNJ10	S360A	Gnomad only	NA	NA	NA	405	D	413	0
438	KCNJ10	S370R	Gnomad only	NA	NA	NA	415	P	423	0
439	KCNJ10	S3P	Gnomad only	NA	NA	NA	4	V	4	0
440	KCNJ10	S72F	Gnomad only	NA	NA	NA	89	C	89	0
441	KCNJ10	T106N	Gnomad only	NA	NA	NA	NA	-	NA	0
442	KCNJ10	T12N	Clinvar only	Uncertain significance	NA	EAST syndrome	13	S	13	0
443	KCNJ10	T154N	Gnomad only	NA	NA	NA	168	G	176	0
444	KCNJ10	T155I	Gnomad only	NA	NA	NA	169	C	177	0
445	KCNJ10	T15P	Gnomad only	NA	NA	NA	16	E	16	0
446	KCNJ10	T164I	Clinvar only	Pathogenic	NA	EAST syndrome	178	A	186	0
447	KCNJ10	T220S	Clinvar & Gnomad	Uncertain significance	NA	EAST syndrome	234	S	242	0
448	KCNJ10	T223S	Gnomad only	NA	NA	NA	237	T	245	1
449	KCNJ10	T242I	Clinvar only	Uncertain significance	NA	EAST syndrome	256	S	264	0
450	KCNJ10	T242S	Gnomad only	NA	NA	NA	256	S	264	0
451	KCNJ10	T286K	Gnomad only	NA	NA	NA	301	M	309	0
452	KCNJ10	T286R	Clinvar & Gnomad	Uncertain significance	968911	EAST syndrome	301	M	309	0
453	KCNJ10	T293I	Clinvar & Gnomad	Uncertain significance	849201	EAST syndrome	308	T	316	1
454	KCNJ10	T298A	Gnomad only	NA	NA	NA	313	S	321	0
455	KCNJ10	T2M	Gnomad only	NA	NA	NA	3	S	3	0
456	KCNJ10	T2R	Clinvar only	Uncertain significance	NA	EAST syndrome	3	S	3	0
457	KCNJ10	T312I	Gnomad only	NA	NA	NA	327	E	335	0
458	KCNJ10	T312S	Gnomad only	NA	NA	NA	327	E	335	0
459	KCNJ10	T346A	Gnomad only	NA	NA	NA	379	E	387	0
460	KCNJ10	T346S	Gnomad only	NA	NA	NA	379	E	387	0
461	KCNJ10	T58I	Gnomad only	NA	NA	NA	75	T	75	1
462	KCNJ10	T74I	Clinvar only	Conflicting interpretations of pathogenicity	NA	not provided|EAST syndrome	91	A	91	0
463	KCNJ10	V112G	Clinvar & Gnomad	Uncertain significance	948757	EAST syndrome	126	V	134	1
464	KCNJ10	V112L	Clinvar only	Uncertain significance	NA	EAST syndrome	126	V	134	1
465	KCNJ10	V145M	Gnomad only	NA	NA	NA	159	F	167	0
466	KCNJ10	V234I	Gnomad only	NA	NA	NA	248	I	256	0
467	KCNJ10	V236G	Gnomad only	NA	NA	NA	250	I	258	0
468	KCNJ10	V240A	Clinvar & Gnomad	Uncertain significance	858442	EAST syndrome	254	F	262	0
469	KCNJ10	V240I	Gnomad only	NA	NA	NA	254	F	262	0
470	KCNJ10	V240L	Gnomad only	NA	NA	NA	254	F	262	0
471	KCNJ10	V240L	Gnomad only	NA	NA	NA	254	F	262	0
472	KCNJ10	V296M	Gnomad only	NA	NA	NA	311	C	319	0
473	KCNJ10	V30F	Gnomad only	NA	NA	NA	47	F	47	0
474	KCNJ10	V30I	Gnomad only	NA	NA	NA	47	F	47	0
475	KCNJ10	V333A	Clinvar & Gnomad	Uncertain significance	205830	not provided|EAST syndrome	347	T	355	0
476	KCNJ10	V336A	Gnomad only	NA	NA	NA	350	V	358	1
477	KCNJ10	V336L	Clinvar & Gnomad	Uncertain significance	1057513	not provided|EAST syndrome	350	V	358	1
478	KCNJ10	V336M	Clinvar & Gnomad	Uncertain significance	426726	not provided	350	V	358	1
479	KCNJ10	V39M	Clinvar & Gnomad	Pathogenic	NA	not provided	56	V	56	1
480	KCNJ10	V4A	Gnomad only	NA	NA	NA	5	R	5	0
481	KCNJ10	V4I	Clinvar & Gnomad	Uncertain significance	435552	not specified	5	R	5	0
482	KCNJ10	V7A	Clinvar & Gnomad	Uncertain significance	1035994	EAST syndrome	8	R	8	0
483	KCNJ10	V84A	Gnomad only	NA	NA	NA	101	C	101	0
484	KCNJ10	V84M	Clinvar & Gnomad	Uncertain significance	205819	EAST syndrome|not provided	101	C	101	0
485	KCNJ10	Y323H	Clinvar only	Uncertain significance	NA	Peripheral neuropathy	337	Y	345	1
486	KCNJ10	Y349C	Clinvar & Gnomad	Uncertain significance	1015917	EAST syndrome	382	L	390	0
487	KCNJ10	Y66C	Gnomad only	NA	NA	NA	83	W	83	0
488	KCNJ10	Y8C	Gnomad only	NA	NA	NA	9	Y	9	1
489	KCNJ11	A101D	Clinvar & Gnomad	Uncertain significance	552375	Transient neonatal diabetes mellitus 3|Hyperinsulinemic hypoglycemia, familial, 2|Permanent neonatal diabetes mellitus	114	D	114	0
490	KCNJ11	A101G	Gnomad only	NA	NA	NA	114	D	114	0
491	KCNJ11	A172D	Gnomad only	NA	NA	NA	184	A	192	1
492	KCNJ11	A172V	Clinvar only	Pathogenic	NA	not provided	184	A	192	1
493	KCNJ11	A174G	Clinvar only	Pathogenic	NA	Neonatal insulin-dependent diabetes mellitus	186	P	194	0
494	KCNJ11	A178T	Gnomad only	NA	NA	NA	190	N	198	0
495	KCNJ11	A187V	Clinvar only	Pathogenic	NA	Transient neonatal diabetes mellitus 3|Hyperinsulinemic hypoglycemia, familial, 2|Permanent neonatal diabetes mellitus	199	A	207	1
496	KCNJ11	A190T	Clinvar & Gnomad	Conflicting interpretations of pathogenicity	992029	not provided|Permanent neonatal diabetes mellitus	202	A	210	1
497	KCNJ11	A190V	Gnomad only	NA	NA	NA	202	A	210	1
498	KCNJ11	A213T	Gnomad only	NA	NA	NA	225	A	233	1
499	KCNJ11	A263D	Gnomad only	NA	NA	NA	275	E	283	0
500	KCNJ11	A28V	Clinvar & Gnomad	Uncertain significance	1065467	Hyperinsulinemic hypoglycemia, familial, 2	25	A	25	1
501	KCNJ11	A362T	Gnomad only	NA	NA	NA	369	S	377	0
502	KCNJ11	A376S	Clinvar only	Uncertain significance	NA	Permanent neonatal diabetes mellitus	383	T	391	0
503	KCNJ11	A87T	Gnomad only	NA	NA	NA	100	G	100	0
504	KCNJ11	A94T	Gnomad only	NA	NA	NA	107	A	107	1
505	KCNJ11	A96T	Gnomad only	NA	NA	NA	109	L	109	0
506	KCNJ11	C166F	Clinvar only	Pathogenic	NA	Permanent neonatal diabetes mellitus|Permanent neonatal diabetes mellitus 2	178	A	186	0
507	KCNJ11	C166W	Clinvar only	Pathogenic	NA	Diabetes mellitus	178	A	186	0
508	KCNJ11	C166Y	Clinvar only	Pathogenic	NA	Permanent neonatal diabetes mellitus	178	A	186	0
509	KCNJ11	C344F	Gnomad only	NA	NA	NA	356	C	364	1
510	KCNJ11	C344Y	Gnomad only	NA	NA	NA	356	C	364	1
511	KCNJ11	C42F	Gnomad only	NA	NA	NA	54	C	54	1
512	KCNJ11	C42R	Clinvar only	Pathogenic	NA	Permanent neonatal diabetes mellitus|Maturity-onset diabetes of the young, type 13|Transient neonatal diabetes mellitus 3	54	C	54	1
513	KCNJ11	D269N	Clinvar & Gnomad	Uncertain significance	NA	not specified	281	D	289	1
514	KCNJ11	D274G	Clinvar only	Uncertain significance	NA	not provided	286	D	294	1
515	KCNJ11	D274N	Gnomad only	NA	NA	NA	286	D	294	1
516	KCNJ11	D274Y	Gnomad only	NA	NA	NA	286	D	294	1
517	KCNJ11	D307N	Gnomad only	NA	NA	NA	318	N	326	0
518	KCNJ11	D323E	Gnomad only	NA	NA	NA	334	K	342	0
519	KCNJ11	D323E	Gnomad only	NA	NA	NA	334	K	342	0
520	KCNJ11	D352N	Gnomad only	NA	NA	NA	364	K	372	0
521	KCNJ11	D387H	Gnomad only	NA	NA	NA	419	R	427	0
522	KCNJ11	D387N	Gnomad only	NA	NA	NA	419	R	427	0
523	KCNJ11	D58E	Clinvar only	Uncertain significance	NA	not provided	71	D	71	1
524	KCNJ11	E104K	Gnomad only	NA	NA	NA	117	K	125	0
525	KCNJ11	E108K	Gnomad only	NA	NA	NA	NA	-	NA	0
526	KCNJ11	E10K	Clinvar & Gnomad	Benign	158674	not specified	7	N	7	0
527	KCNJ11	E10Q	Clinvar & Gnomad	Benign	801368	not provided	7	N	7	0
528	KCNJ11	E179A	Clinvar only	Pathogenic	NA	Neonatal insulin-dependent diabetes mellitus	191	E	199	1
529	KCNJ11	E227K	Clinvar & Gnomad	Pathogenic	158682	Maturity-onset diabetes of the young, type 13|not provided|Diabetes mellitus|Transient neonatal diabetes mellitus 3	239	E	247	1
530	KCNJ11	E229K	Clinvar only	Pathogenic	NA	Diabetes mellitus	241	E	249	1
531	KCNJ11	E282K	Clinvar & Gnomad	Pathogenic	8686	Hyperinsulinemic hypoglycemia, familial, 2|Maturity-onset diabetes of the young, type 13|Hyperinsulinemic hypoglycemia, familial, 2|Transient neonatal diabetes mellitus 3|Type 2 diabetes mellitus|Permanent neonatal diabetes mellitus	293	E	301	1
532	KCNJ11	E292K	Clinvar only	Uncertain significance	NA	Permanent neonatal diabetes mellitus|not provided	303	E	311	1
533	KCNJ11	E322K	Clinvar only	Pathogenic	NA	Permanent neonatal diabetes mellitus|Diabetes mellitus	333	E	341	1
534	KCNJ11	E351K	Gnomad only	NA	NA	NA	363	E	371	1
535	KCNJ11	F123L	Gnomad only	NA	NA	NA	135	F	143	1
536	KCNJ11	F315L	Clinvar & Gnomad	Uncertain significance	NA	not provided	326	Y	334	0
537	KCNJ11	F315S	Clinvar only	Pathogenic	NA	not provided	326	Y	334	0
538	KCNJ11	F333I	Clinvar only	Pathogenic	NA	Permanent neonatal diabetes mellitus	344	F	352	1
539	KCNJ11	F35L	Clinvar only	Pathogenic	NA	Permanent neonatal diabetes mellitus	47	F	47	1
540	KCNJ11	F35V	Clinvar only	Pathogenic	NA	Permanent neonatal diabetes mellitus	47	F	47	1
541	KCNJ11	F55L	Gnomad only	NA	NA	NA	68	Y	68	0
542	KCNJ11	F60S	Clinvar only	Uncertain significance	NA	not specified	73	F	73	1
543	KCNJ11	F60Y	Clinvar only	Pathogenic	NA	Permanent neonatal diabetes mellitus 2	73	F	73	1
544	KCNJ11	G135E	Gnomad only	NA	NA	NA	147	F	155	0
545	KCNJ11	G156R	Clinvar only	Pathogenic	NA	Hyperinsulinemic hypoglycemia, familial, 2	168	G	176	1
546	KCNJ11	G165S	Gnomad only	NA	NA	NA	177	G	185	1
547	KCNJ11	G194S	Gnomad only	NA	NA	NA	206	G	214	1
548	KCNJ11	G228S	Gnomad only	NA	NA	NA	240	G	248	1
549	KCNJ11	G243S	Gnomad only	NA	NA	NA	255	D	263	0
550	KCNJ11	G245C	Gnomad only	NA	NA	NA	257	G	265	1
551	KCNJ11	G289A	Clinvar only	Pathogenic	NA	Hyperinsulinemic hypoglycemia, familial, 2	300	G	308	1
552	KCNJ11	G289V	Clinvar only	Pathogenic	NA	Hyperinsulinemic hypoglycemia, familial, 2	300	G	308	1
553	KCNJ11	G312S	Clinvar & Gnomad	Uncertain significance	211231	not specified	323	G	331	1
554	KCNJ11	G324R	Clinvar & Gnomad	Uncertain significance	551025	Transient neonatal diabetes mellitus 3|Hyperinsulinemic hypoglycemia, familial, 2|Permanent neonatal diabetes mellitus	335	H	343	0
555	KCNJ11	G334D	Clinvar only	Pathogenic	NA	Permanent neonatal diabetes mellitus	345	H	353	0
556	KCNJ11	G366R	Gnomad only	NA	NA	NA	373	S	381	0
557	KCNJ11	G40D	Clinvar only	Uncertain significance	NA	Transient neonatal diabetes mellitus 3|Hyperinsulinemic hypoglycemia, familial, 2|Permanent neonatal diabetes mellitus	52	G	52	1
558	KCNJ11	G40S	Gnomad only	NA	NA	NA	52	G	52	1
559	KCNJ11	G53D	Clinvar only	Pathogenic	NA	Permanent neonatal diabetes mellitus|Permanent neonatal diabetes mellitus 2	65	G	65	1
560	KCNJ11	G53R	Clinvar only	Pathogenic	NA	Transient neonatal diabetes mellitus 3	65	G	65	1
561	KCNJ11	G53S	Clinvar only	Pathogenic	NA	Transient neonatal diabetes mellitus 3	65	G	65	1
562	KCNJ11	G6D	Gnomad only	NA	NA	NA	3	S	3	0
563	KCNJ11	G6S	Gnomad only	NA	NA	NA	3	S	3	0
564	KCNJ11	G98D	Gnomad only	NA	NA	NA	111	G	111	1
565	KCNJ11	G98S	Clinvar only	Uncertain significance	NA	Transient neonatal diabetes mellitus 3|Hyperinsulinemic hypoglycemia, familial, 2|Permanent neonatal diabetes mellitus	111	G	111	1
566	KCNJ11	H115R	Gnomad only	NA	NA	NA	127	N	135	0
567	KCNJ11	H175Q	Clinvar only	Uncertain significance	NA	Maturity-onset diabetes of the young, type 13|Transient neonatal diabetes mellitus 3|Hyperinsulinemic hypoglycemia, familial, 2	187	K	195	0
568	KCNJ11	H186D	Clinvar only	Pathogenic	NA	not provided	198	N	206	0
569	KCNJ11	H193R	Gnomad only	NA	NA	NA	205	D	213	0
570	KCNJ11	H234Y	Gnomad only	NA	NA	NA	246	D	254	0
571	KCNJ11	H259R	Clinvar & Gnomad	Pathogenic	8677	Hyperinsulinemic hypoglycemia, familial, 2|not provided	271	H	279	1
572	KCNJ11	H353R	Gnomad only	NA	NA	NA	365	K	373	0
573	KCNJ11	H353Y	Gnomad only	NA	NA	NA	365	K	373	0
574	KCNJ11	I125L	Gnomad only	NA	NA	NA	137	I	145	1
575	KCNJ11	I146N	Gnomad only	NA	NA	NA	158	V	166	0
576	KCNJ11	I150T	Gnomad only	NA	NA	NA	162	V	170	0
577	KCNJ11	I167L	Clinvar only	Pathogenic	NA	Permanent neonatal diabetes mellitus|Permanent neonatal diabetes mellitus 2	179	V	187	0
578	KCNJ11	I182V	Clinvar only	Pathogenic	NA	Permanent neonatal diabetes mellitus	194	V	202	0
579	KCNJ11	I210T	Clinvar only	Uncertain significance	NA	not specified	222	L	230	0
580	KCNJ11	I249V	Gnomad only	NA	NA	NA	261	I	269	1
581	KCNJ11	I296L	Clinvar only	Pathogenic	NA	Permanent neonatal diabetes mellitus	307	M	315	0
582	KCNJ11	I296V	Clinvar only	Pathogenic	NA	Permanent neonatal diabetes mellitus	307	M	315	0
583	KCNJ11	I318V	Gnomad only	NA	NA	NA	329	V	337	0
584	KCNJ11	I384F	Gnomad only	NA	NA	NA	416	L	424	0
585	KCNJ11	I384L	Gnomad only	NA	NA	NA	416	L	424	0
586	KCNJ11	I49M	Gnomad only	NA	NA	NA	61	V	61	0
587	KCNJ11	I74T	Gnomad only	NA	NA	NA	87	I	87	1
588	KCNJ11	I7S	Gnomad only	NA	NA	NA	4	V	4	0
589	KCNJ11	K170E	Gnomad only	NA	NA	NA	182	K	190	1
590	KCNJ11	K170N	Clinvar only	Pathogenic	NA	Permanent neonatal diabetes mellitus|Permanent neonatal diabetes mellitus 2	182	K	190	1
591	KCNJ11	K170R	Clinvar only	Pathogenic	NA	Permanent neonatal diabetes mellitus|Permanent neonatal diabetes mellitus 2	182	K	190	1
592	KCNJ11	K222Q	Gnomad only	NA	NA	NA	234	S	242	0
593	KCNJ11	K23E	Gnomad only	NA	8678	NA	20	K	20	1
594	KCNJ11	K338N	Gnomad only	NA	NA	NA	349	E	357	0
595	KCNJ11	K381R	Gnomad only	NA	NA	NA	413	S	421	0
596	KCNJ11	K67N	Gnomad only	NA	NA	NA	80	R	80	0
597	KCNJ11	L122P	Clinvar only	Pathogenic	NA	Hyperinsulinemic hypoglycemia, familial, 2	134	L	142	1
598	KCNJ11	L147P	Clinvar & Gnomad	Pathogenic	8665	Hyperinsulinemic hypoglycemia, familial, 2	159	F	167	0
599	KCNJ11	L164F	Clinvar only	Uncertain significance	NA	not specified	176	I	184	0
600	KCNJ11	L181F	Clinvar only	Uncertain significance	NA	not provided	193	L	201	1
601	KCNJ11	L233F	Clinvar only	Pathogenic	NA	Maturity-onset diabetes of the young, type 13	245	L	253	1
602	KCNJ11	L270M	Gnomad only	NA	NA	NA	282	L	290	1
603	KCNJ11	L270V	Clinvar & Gnomad	Benign	158685	Permanent neonatal diabetes mellitus|Monogenic diabetes|not specified|Hyperinsulinemic hypoglycemia, familial, 2|Permanent neonatal diabetes mellitus 2|Maturity-onset diabetes of the young, type 13|not provided|Transient neonatal diabetes mellitus 3	282	L	290	1
604	KCNJ11	L2P	Clinvar only	Pathogenic	NA	Neonatal diabetes mellitus	NA	-	NA	0
605	KCNJ11	L305P	Gnomad only	NA	NA	NA	316	L	324	1
606	KCNJ11	L349F	Gnomad only	NA	NA	NA	361	L	369	1
607	KCNJ11	L349P	Gnomad only	NA	NA	NA	361	L	369	1
608	KCNJ11	L355P	Clinvar only	Uncertain significance	NA	Transient neonatal diabetes mellitus 3|Maturity-onset diabetes of the young, type 13|Hyperinsulinemic hypoglycemia, familial, 2|not specified	367	I	375	0
609	KCNJ11	L361F	Gnomad only	NA	NA	NA	NA	-	NA	0
610	KCNJ11	L72M	Gnomad only	NA	NA	NA	85	L	85	1
611	KCNJ11	L73F	Gnomad only	NA	NA	NA	86	V	86	0
612	KCNJ11	L80P	Gnomad only	NA	NA	NA	93	V	93	0
613	KCNJ11	L85H	Gnomad only	NA	NA	NA	98	F	98	0
614	KCNJ11	M137I	Gnomad only	NA	NA	NA	149	C	157	0
615	KCNJ11	M158L	Clinvar only	Uncertain significance	NA	Transient neonatal diabetes mellitus 3	170	I	178	0
616	KCNJ11	M217L	Gnomad only	NA	NA	NA	229	A	237	0
617	KCNJ11	M217T	Gnomad only	NA	NA	NA	229	A	237	0
618	KCNJ11	M217V	Gnomad only	NA	NA	NA	229	A	237	0
619	KCNJ11	M240R	Clinvar & Gnomad	Uncertain significance	284188	not provided	252	V	260	0
620	KCNJ11	M375K	Gnomad only	NA	NA	NA	382	L	390	0
621	KCNJ11	M375V	Clinvar & Gnomad	Uncertain significance	193109	not provided	382	L	390	0
622	KCNJ11	M88I	Clinvar only	Uncertain significance	NA	Hyperinsulinemic hypoglycemia, familial, 2|Permanent neonatal diabetes mellitus|Transient neonatal diabetes mellitus 3	101	C	101	0
623	KCNJ11	N335K	Clinvar only	Uncertain significance	NA	Permanent neonatal diabetes mellitus	346	K	354	0
624	KCNJ11	N41H	Gnomad only	NA	NA	NA	53	H	53	0
625	KCNJ11	P102S	Gnomad only	NA	NA	NA	115	A	115	0
626	KCNJ11	P109L	Gnomad only	NA	NA	NA	121	A	129	0
627	KCNJ11	P109T	Gnomad only	NA	NA	NA	121	A	129	0
628	KCNJ11	P254L	Clinvar & Gnomad	Pathogenic	8675	Hyperinsulinemic hypoglycemia, familial, 2	266	P	274	1
629	KCNJ11	P266L	Clinvar only	Uncertain significance	NA	Permanent neonatal diabetes mellitus|Transient neonatal diabetes mellitus 3|Hyperinsulinemic hypoglycemia, familial, 2	278	P	286	1
630	KCNJ11	P317T	Gnomad only	NA	NA	NA	328	P	336	1
631	KCNJ11	P367S	Gnomad only	NA	NA	NA	374	F	382	0
632	KCNJ11	P374R	Gnomad only	NA	NA	NA	381	A	389	0
633	KCNJ11	P374S	Gnomad only	NA	NA	NA	381	A	389	0
634	KCNJ11	P386S	Gnomad only	NA	NA	NA	418	P	426	1
635	KCNJ11	P69T	Gnomad only	NA	NA	NA	82	R	82	0
636	KCNJ11	Q152H	Gnomad only	NA	NA	NA	164	Q	172	1
637	KCNJ11	Q348H	Clinvar & Gnomad	Uncertain significance	917414	Monogenic diabetes	360	D	368	0
638	KCNJ11	Q52R	Clinvar only	Pathogenic	NA	Permanent neonatal diabetes mellitus	64	K	64	0
639	KCNJ11	R136C	Clinvar & Gnomad	Pathogenic	435558	Hyperinsulinemic hypoglycemia, familial, 2	148	R	156	1
640	KCNJ11	R136H	Clinvar only	Uncertain significance	NA	Permanent neonatal diabetes mellitus|Transient neonatal diabetes mellitus 3|Hyperinsulinemic hypoglycemia, familial, 2	148	R	156	1
641	KCNJ11	R136L	Gnomad only	NA	NA	NA	148	R	156	1
642	KCNJ11	R136S	Clinvar only	Uncertain significance	NA	not provided	148	R	156	1
643	KCNJ11	R16C	Gnomad only	NA	NA	NA	13	S	13	0
644	KCNJ11	R16H	Clinvar & Gnomad	Uncertain significance	441000	Type 2 diabetes mellitus	13	S	13	0
645	KCNJ11	R176C	Clinvar & Gnomad	Uncertain significance	211223	not specified	188	K	196	0
646	KCNJ11	R176H	Clinvar & Gnomad	Uncertain significance	555940	Hyperinsulinemic hypoglycemia, familial, 2|Transient neonatal diabetes mellitus 3|Permanent neonatal diabetes mellitus	188	K	196	0
647	KCNJ11	R176L	Gnomad only	NA	NA	NA	188	K	196	0
648	KCNJ11	R192C	Gnomad only	NA	NA	NA	204	R	212	1
649	KCNJ11	R192H	Clinvar & Gnomad	Uncertain significance	552480	Transient neonatal diabetes mellitus 3|Hyperinsulinemic hypoglycemia, familial, 2|Permanent neonatal diabetes mellitus	204	R	212	1
650	KCNJ11	R192L	Gnomad only	NA	NA	NA	204	R	212	1
651	KCNJ11	R195C	Gnomad only	NA	NA	NA	207	K	215	0
652	KCNJ11	R195H	Clinvar & Gnomad	Conflicting interpretations of pathogenicity	158681	not specified|Permanent neonatal diabetes mellitus|Transient neonatal diabetes mellitus 3|Hyperinsulinemic hypoglycemia, familial, 2|not provided|Permanent neonatal diabetes mellitus	207	K	215	0
653	KCNJ11	R201C	Clinvar only	Pathogenic	NA	Diabetes mellitus|Permanent neonatal diabetes mellitus|Permanent neonatal diabetes mellitus 2|Transient neonatal diabetes mellitus 3	213	R	221	1
654	KCNJ11	R201H	Clinvar only	Pathogenic	NA	Permanent neonatal diabetes mellitus|Permanent neonatal diabetes mellitus 2|not provided|Neonatal insulin-dependent diabetes mellitus|Transient neonatal diabetes mellitus 3	213	R	221	1
655	KCNJ11	R201L	Clinvar only	Pathogenic	NA	Permanent neonatal diabetes mellitus	213	R	221	1
656	KCNJ11	R206C	Clinvar & Gnomad	Pathogenic	NA	not provided	218	R	226	1
657	KCNJ11	R206H	Clinvar only	Pathogenic	NA	Hyperinsulinemic hypoglycemia, familial, 2	218	R	226	1
658	KCNJ11	R206L	Clinvar only	Uncertain significance	NA	Hyperinsulinemic hypoglycemia, familial, 2|Transient neonatal diabetes mellitus 3|Permanent neonatal diabetes mellitus	218	R	226	1
659	KCNJ11	R221C	Gnomad only	NA	NA	NA	233	K	241	0
660	KCNJ11	R221G	Clinvar only	Uncertain significance	NA	not provided	233	K	241	0
661	KCNJ11	R221H	Clinvar & Gnomad	Uncertain significance	556784	Permanent neonatal diabetes mellitus|Transient neonatal diabetes mellitus 3|Hyperinsulinemic hypoglycemia, familial, 2	233	K	241	0
662	KCNJ11	R221S	Gnomad only	NA	NA	NA	233	K	241	0
663	KCNJ11	R27C	Clinvar & Gnomad	Conflicting interpretations of pathogenicity	211226	not provided|Hyperinsulinemic hypoglycemia, familial, 2|Permanent neonatal diabetes mellitus|Transient neonatal diabetes mellitus 3|Permanent neonatal diabetes mellitus|Hyperinsulinemic hypoglycemia, familial, 2	24	M	24	0
664	KCNJ11	R27H	Clinvar & Gnomad	Uncertain significance	285043	not provided|Hyperinsulinemic hypoglycemia, familial, 2|Permanent neonatal diabetes mellitus|Transient neonatal diabetes mellitus 3|Permanent neonatal diabetes mellitus	24	M	24	0
665	KCNJ11	R29C	Gnomad only	NA	NA	NA	41	Q	41	0
666	KCNJ11	R29H	Clinvar & Gnomad	Uncertain significance	1303355	not provided	41	Q	41	0
667	KCNJ11	R301C	Clinvar & Gnomad	Pathogenic	642470	not provided	312	R	320	1
668	KCNJ11	R301H	Clinvar & Gnomad	Conflicting interpretations of pathogenicity	8683	Maturity-onset diabetes of the young, type 13|Hyperinsulinemic hypoglycemia, familial, 2|Transient neonatal diabetes mellitus 3|Permanent neonatal diabetes mellitus|not provided|Transient neonatal diabetes mellitus 3|Hyperinsulinemic hypoglycemia, familial, 2	312	R	320	1
669	KCNJ11	R301L	Gnomad only	NA	NA	NA	312	R	320	1
670	KCNJ11	R301P	Clinvar only	Conflicting interpretations of pathogenicity	NA	not provided|Monogenic diabetes	312	R	320	1
671	KCNJ11	R314C	Gnomad only	NA	NA	NA	325	R	333	1
672	KCNJ11	R314H	Clinvar & Gnomad	Uncertain significance	1034248	Permanent neonatal diabetes mellitus 1	325	R	333	1
673	KCNJ11	R31L	Gnomad only	NA	NA	NA	43	C	43	0
674	KCNJ11	R31Q	Gnomad only	NA	NA	NA	43	C	43	0
675	KCNJ11	R31W	Clinvar & Gnomad	Uncertain significance	878730	Maturity-onset diabetes of the young, type 13|Hyperinsulinemic hypoglycemia, familial, 2|Transient neonatal diabetes mellitus 3	43	C	43	0
676	KCNJ11	R325C	Gnomad only	NA	NA	NA	336	Y	344	0
677	KCNJ11	R325H	Gnomad only	NA	NA	NA	336	Y	344	0
678	KCNJ11	R325P	Gnomad only	NA	NA	NA	336	Y	344	0
679	KCNJ11	R325S	Clinvar & Gnomad	Uncertain significance	435560	not specified|not provided|Permanent neonatal diabetes mellitus|Transient neonatal diabetes mellitus 3|Hyperinsulinemic hypoglycemia, familial, 2|Type 2 diabetes mellitus|Maturity-onset diabetes of the young, type 13	336	Y	344	0
680	KCNJ11	R347C	Gnomad only	NA	NA	NA	359	R	367	1
681	KCNJ11	R347H	Clinvar & Gnomad	Uncertain significance	553036	Hyperinsulinemic hypoglycemia, familial, 2|Permanent neonatal diabetes mellitus|Maturity-onset diabetes of the young, type 13|not provided|Monogenic diabetes|Hyperinsulinemic hypoglycemia, familial, 2|Permanent neonatal diabetes mellitus|Transient neonatal diabetes mellitus 3	359	R	367	1
682	KCNJ11	R34C	Clinvar & Gnomad	Pathogenic	557416	Permanent neonatal diabetes mellitus|Transient neonatal diabetes mellitus 3|Hyperinsulinemic hypoglycemia, familial, 2	46	R	46	1
683	KCNJ11	R34H	Clinvar & Gnomad	Pathogenic	1219242	Permanent neonatal diabetes mellitus|not provided	46	R	46	1
684	KCNJ11	R34L	Gnomad only	NA	NA	NA	46	R	46	1
685	KCNJ11	R365C	Clinvar & Gnomad	Uncertain significance	287827	not provided|Hyperinsulinemic hypoglycemia, familial, 2|Transient neonatal diabetes mellitus 3|Permanent neonatal diabetes mellitus	372	N	380	0
686	KCNJ11	R365H	Clinvar & Gnomad	Uncertain significance	551506	Transient neonatal diabetes mellitus 3|Hyperinsulinemic hypoglycemia, familial, 2|Permanent neonatal diabetes mellitus	372	N	380	0
687	KCNJ11	R369C	Clinvar & Gnomad	Uncertain significance	992024	Permanent neonatal diabetes mellitus	376	Y	384	0
688	KCNJ11	R369H	Gnomad only	NA	NA	NA	376	Y	384	0
689	KCNJ11	R369L	Clinvar & Gnomad	Uncertain significance	NA	not specified	376	Y	384	0
690	KCNJ11	R369S	Gnomad only	NA	NA	NA	376	Y	384	0
691	KCNJ11	R371C	Gnomad only	NA	NA	NA	378	N	386	0
692	KCNJ11	R371H	Clinvar & Gnomad	Uncertain significance	554088	Hyperinsulinemic hypoglycemia, familial, 2|Permanent neonatal diabetes mellitus|Transient neonatal diabetes mellitus 3	378	N	386	0
693	KCNJ11	R4C	Clinvar & Gnomad	Uncertain significance	989948	Permanent neonatal diabetes mellitus	1	M	1	0
694	KCNJ11	R4H	Gnomad only	NA	NA	NA	1	M	1	0
695	KCNJ11	R4S	Clinvar & Gnomad	Uncertain significance	193108	not provided	1	M	1	0
696	KCNJ11	R50L	Gnomad only	NA	NA	NA	62	G	62	0
697	KCNJ11	R50P	Clinvar only	Pathogenic	NA	Permanent neonatal diabetes mellitus|Permanent neonatal diabetes mellitus 2	62	G	62	0
698	KCNJ11	R50Q	Clinvar only	Pathogenic	NA	Neonatal diabetes mellitus|not provided	62	G	62	0
699	KCNJ11	R54C	Clinvar & Gnomad	Pathogenic	447634	not provided	67	R	67	1
700	KCNJ11	R54H	Clinvar & Gnomad	Uncertain significance	158673	Hyperinsulinemic hypoglycemia, familial, 2	67	R	67	1
701	KCNJ11	S103R	Clinvar & Gnomad	Uncertain significance	989944	Permanent neonatal diabetes mellitus	116	S	124	1
702	KCNJ11	S113G	Gnomad only	NA	NA	NA	125	E	133	0
703	KCNJ11	S116P	Clinvar only	Uncertain significance	NA	not provided	128	S	136	1
704	KCNJ11	S118L	Clinvar & Gnomad	Uncertain significance	NA	not specified	130	T	138	0
705	KCNJ11	S119A	Gnomad only	NA	NA	NA	131	A	139	0
706	KCNJ11	S265I	Clinvar & Gnomad	Uncertain significance	549538	Monogenic diabetes	277	S	285	1
707	KCNJ11	S273G	Gnomad only	NA	NA	NA	285	Q	293	0
708	KCNJ11	S327Y	Clinvar only	Uncertain significance	NA	not provided|not specified	338	K	346	0
709	KCNJ11	S331C	Clinvar & Gnomad	Uncertain significance	NA	not specified	342	S	350	1
710	KCNJ11	S354G	Gnomad only	NA	NA	NA	366	Y	374	0
711	KCNJ11	S363L	Gnomad only	NA	NA	NA	370	N	378	0
712	KCNJ11	S37C	Gnomad only	NA	NA	NA	49	K	49	0
713	KCNJ11	S385C	Clinvar & Gnomad	Conflicting interpretations of pathogenicity	36430	Neonatal diabetes mellitus|Maturity-onset diabetes of the young, type 13|not specified|Hyperinsulinemic hypoglycemia, familial, 2|Monogenic diabetes|Transient neonatal diabetes mellitus 3|not provided	417	E	425	0
714	KCNJ11	S385F	Gnomad only	NA	NA	NA	417	E	425	0
715	KCNJ11	S3C	Clinvar only	Pathogenic	NA	Neonatal insulin-dependent diabetes mellitus	NA	-	NA	0
716	KCNJ11	S6R	Gnomad only	NA	NA	NA	3	S	3	1
717	KCNJ11	S82N	Clinvar only	Uncertain significance	NA	not provided	95	S	95	1
718	KCNJ11	T112A	Gnomad only	NA	NA	NA	124	S	132	0
719	KCNJ11	T15I	Gnomad only	NA	NA	NA	12	V	12	0
720	KCNJ11	T180N	Clinvar only	Uncertain significance	NA	Transient neonatal diabetes mellitus 3	192	T	200	1
721	KCNJ11	T223I	Gnomad only	NA	NA	NA	235	R	243	0
722	KCNJ11	T223S	Gnomad only	NA	NA	NA	235	R	243	0
723	KCNJ11	T294M	Clinvar & Gnomad	Pathogenic	211230	Transient neonatal diabetes mellitus 3|Type 2 diabetes mellitus|Hyperinsulinemic hypoglycemia, familial, 2|Permanent neonatal diabetes mellitus 2|Maturity-onset diabetes of the young, type 13|Hyperinsulinemic hypoglycemia, familial, 2|Transient neonatal diabetes mellitus 3|not provided	305	T	313	1
724	KCNJ11	T302I	Clinvar & Gnomad	Uncertain significance	992026	Permanent neonatal diabetes mellitus	313	S	321	0
725	KCNJ11	T345K	Gnomad only	NA	NA	NA	357	S	365	0
726	KCNJ11	T345M	Clinvar & Gnomad	Conflicting interpretations of pathogenicity	303734	Maturity-onset diabetes of the young, type 13|Hyperinsulinemic hypoglycemia, familial, 2|Transient neonatal diabetes mellitus 3	357	S	365	0
727	KCNJ11	T360N	Gnomad only	NA	NA	NA	NA	-	NA	0
728	KCNJ11	T62M	Clinvar & Gnomad	Pathogenic	435559	not specified	75	T	75	1
729	KCNJ11	T62R	Clinvar only	Pathogenic	NA	Dermatitis, atopic|Hypertrichosis|Hyperinsulinemia|Hypoglycemia	75	T	75	1
730	KCNJ11	T71I	Gnomad only	NA	NA	NA	84	M	84	0
731	KCNJ11	V127I	Gnomad only	NA	NA	NA	139	T	147	0
732	KCNJ11	V138L	Clinvar only	Uncertain significance	NA	not provided	150	V	158	1
733	KCNJ11	V13M	Gnomad only	NA	NA	NA	10	S	10	0
734	KCNJ11	V151M	Clinvar & Gnomad	Conflicting interpretations of pathogenicity	877702	Maturity-onset diabetes of the young, type 13|Transient neonatal diabetes mellitus 3|Hyperinsulinemic hypoglycemia, familial, 2	163	F	171	0
735	KCNJ11	V155M	Clinvar & Gnomad	Uncertain significance	158675	Transient neonatal diabetes mellitus 3|Permanent neonatal diabetes mellitus|Hyperinsulinemic hypoglycemia, familial, 2|Permanent neonatal diabetes mellitus|Diabetes mellitus	167	V	175	1
736	KCNJ11	V202A	Gnomad only	NA	NA	NA	214	V	222	1
737	KCNJ11	V219L	Gnomad only	NA	NA	NA	231	L	239	0
738	KCNJ11	V219M	Gnomad only	NA	NA	NA	231	L	239	0
739	KCNJ11	V236G	Gnomad only	NA	NA	NA	248	I	256	0
740	KCNJ11	V236M	Gnomad only	NA	NA	NA	248	I	256	0
741	KCNJ11	V244M	Gnomad only	NA	NA	NA	256	S	264	0
742	KCNJ11	V252A	Clinvar only	Pathogenic	NA	Permanent neonatal diabetes mellitus	264	V	272	1
743	KCNJ11	V285I	Clinvar & Gnomad	Uncertain significance	552596	Hyperinsulinemic hypoglycemia, familial, 2|Permanent neonatal diabetes mellitus|Transient neonatal diabetes mellitus 3	296	V	304	1
744	KCNJ11	V290L	Gnomad only	NA	NA	NA	301	M	309	0
745	KCNJ11	V290M	Clinvar & Gnomad	Pathogenic	435556	Hyperinsulinemic hypoglycemia, familial, 2	301	M	309	0
746	KCNJ11	V328A	Gnomad only	NA	NA	NA	339	V	347	1
747	KCNJ11	V337I	Gnomad only	NA	158670	NA	348	Y	356	0
748	KCNJ11	V339G	Clinvar & Gnomad	Uncertain significance	550169	Transient neonatal diabetes mellitus 3|Type 2 diabetes mellitus|Maturity-onset diabetes of the young, type 13|Permanent neonatal diabetes mellitus|Hyperinsulinemic hypoglycemia, familial, 2|Transient neonatal diabetes mellitus 3|Permanent neonatal diabetes mellitus|Hyperinsulinemic hypoglycemia, familial, 2	350	V	358	1
749	KCNJ11	V373L	Gnomad only	NA	NA	NA	380	V	388	1
750	KCNJ11	V373M	Clinvar & Gnomad	Benign	992023	Permanent neonatal diabetes mellitus|not provided	380	V	388	1
751	KCNJ11	V44M	Clinvar & Gnomad	Uncertain significance	NA	not specified	56	V	56	1
752	KCNJ11	V59G	Clinvar only	Pathogenic	NA	Permanent neonatal diabetes mellitus|Permanent neonatal diabetes mellitus 2	72	I	72	0
753	KCNJ11	V59M	Clinvar only	Pathogenic	NA	Permanent neonatal diabetes mellitus|Permanent neonatal diabetes mellitus 2|not provided|Neonatal insulin-dependent diabetes mellitus	72	I	72	0
754	KCNJ11	V64L	Gnomad only	NA	NA	NA	77	V	77	1
755	KCNJ11	W68G	Gnomad only	NA	NA	NA	81	W	81	1
756	KCNJ11	W83S	Clinvar only	Uncertain significance	NA	not specified	96	W	96	1
757	KCNJ11	Y258C	Gnomad only	NA	NA	NA	270	V	278	0
758	KCNJ11	Y258H	Gnomad only	NA	NA	NA	270	V	278	0
759	KCNJ11	Y268F	Clinvar only	Uncertain significance	NA	Transient neonatal diabetes mellitus 3	280	Y	288	1
760	KCNJ11	Y330C	Clinvar only	Pathogenic	NA	Neonatal insulin-dependent diabetes mellitus|Permanent neonatal diabetes mellitus	341	Y	349	1
761	KCNJ11	Y330F	Clinvar only	Uncertain significance	NA	not provided	341	Y	349	1
762	KCNJ11	Y330H	Clinvar only	Pathogenic	NA	Diabetes mellitus	341	Y	349	1
763	KCNJ12	A106E	Gnomad only	NA	NA	NA	107	A	107	1
764	KCNJ12	A106T	Gnomad only	NA	NA	NA	107	A	107	1
765	KCNJ12	A106V	Gnomad only	NA	NA	NA	107	A	107	1
766	KCNJ12	A115P	Gnomad only	NA	NA	NA	116	S	124	0
767	KCNJ12	A133P	Gnomad only	NA	NA	NA	132	A	140	1
768	KCNJ12	A200P	Gnomad only	NA	NA	NA	199	A	207	1
769	KCNJ12	A200S	Gnomad only	NA	NA	NA	199	A	207	1
770	KCNJ12	A200T	Gnomad only	NA	NA	NA	199	A	207	1
771	KCNJ12	A200V	Gnomad only	NA	NA	NA	199	A	207	1
772	KCNJ12	A203T	Gnomad only	NA	NA	NA	202	A	210	1
773	KCNJ12	A230T	Gnomad only	NA	NA	NA	229	A	237	1
774	KCNJ12	A277D	Gnomad only	NA	NA	NA	276	D	284	0
775	KCNJ12	A277V	Gnomad only	NA	NA	NA	276	D	284	0
776	KCNJ12	A307G	Gnomad only	NA	NA	NA	306	A	314	1
777	KCNJ12	A359E	Gnomad only	NA	NA	NA	358	A	366	1
778	KCNJ12	A359V	Gnomad only	NA	NA	NA	358	A	366	1
779	KCNJ12	A372G	Gnomad only	NA	NA	NA	371	A	379	1
780	KCNJ12	A392V	Gnomad only	NA	NA	NA	391	E	399	0
781	KCNJ12	A3T	Gnomad only	NA	NA	NA	2	G	2	0
782	KCNJ12	A3V	Gnomad only	NA	NA	NA	2	G	2	0
783	KCNJ12	A417V	Gnomad only	NA	NA	NA	411	Q	419	0
784	KCNJ12	A58T	Gnomad only	NA	NA	NA	59	I	59	0
785	KCNJ12	C123R	Gnomad only	NA	NA	NA	122	C	130	1
786	KCNJ12	C150Y	Gnomad only	NA	NA	NA	149	C	157	1
787	KCNJ12	C155F	Gnomad only	NA	NA	NA	154	C	162	1
788	KCNJ12	C376S	Gnomad only	NA	NA	NA	375	C	383	1
789	KCNJ12	D111E	Gnomad only	NA	NA	NA	112	D	112	1
790	KCNJ12	D111N	Gnomad only	NA	NA	NA	112	D	112	1
791	KCNJ12	D250N	Gnomad only	NA	NA	NA	249	D	257	1
792	KCNJ12	D250Y	Gnomad only	NA	NA	NA	249	D	257	1
793	KCNJ12	D252N	Gnomad only	NA	NA	NA	251	N	259	0
794	KCNJ12	D256H	Gnomad only	NA	NA	NA	255	D	263	1
795	KCNJ12	D256N	Gnomad only	NA	NA	NA	255	D	263	1
796	KCNJ12	D256Y	Gnomad only	NA	NA	NA	255	D	263	1
797	KCNJ12	D292A	Gnomad only	NA	NA	NA	291	D	299	1
798	KCNJ12	D292G	Gnomad only	NA	NA	NA	291	D	299	1
799	KCNJ12	D292Y	Gnomad only	NA	NA	NA	291	D	299	1
800	KCNJ12	D387E	Gnomad only	NA	NA	NA	386	E	394	0
801	KCNJ12	D402G	Gnomad only	NA	NA	NA	401	D	409	1
802	KCNJ12	D413E	Gnomad only	NA	NA	NA	407	D	415	1
803	KCNJ12	E113D	Gnomad only	NA	NA	NA	114	D	114	0
804	KCNJ12	E350D	Gnomad only	NA	NA	NA	349	E	357	1
805	KCNJ12	E350K	Gnomad only	NA	NA	NA	349	E	357	1
806	KCNJ12	E388K	Gnomad only	NA	NA	NA	387	E	395	1
807	KCNJ12	E388Q	Gnomad only	NA	NA	NA	387	E	395	1
808	KCNJ12	F281L	Gnomad only	NA	NA	NA	280	Y	288	0
809	KCNJ12	F72S	Gnomad only	NA	NA	NA	73	F	73	1
810	KCNJ12	G110V	Gnomad only	NA	NA	NA	111	G	111	1
811	KCNJ12	G117A	Gnomad only	NA	NA	NA	118	E	126	0
812	KCNJ12	G117D	Gnomad only	NA	NA	NA	118	E	126	0
813	KCNJ12	G119D	Gnomad only	NA	NA	NA	120	K	128	0
814	KCNJ12	G169R	Gnomad only	NA	NA	NA	168	G	176	1
815	KCNJ12	G169S	Gnomad only	NA	NA	NA	168	G	176	1
816	KCNJ12	G19R	Gnomad only	NA	NA	NA	18	G	18	1
817	KCNJ12	G216S	Gnomad only	NA	NA	NA	215	G	223	1
818	KCNJ12	G241A	Gnomad only	NA	NA	NA	240	G	248	1
819	KCNJ12	G241D	Gnomad only	NA	NA	NA	240	G	248	1
820	KCNJ12	G241V	Gnomad only	NA	NA	NA	240	G	248	1
821	KCNJ12	G254A	Gnomad only	NA	NA	NA	253	G	261	1
822	KCNJ12	G282S	Gnomad only	NA	NA	NA	281	D	289	0
823	KCNJ12	G301D	Gnomad only	NA	NA	NA	300	G	308	1
824	KCNJ12	G324S	Gnomad only	NA	NA	NA	323	G	331	1
825	KCNJ12	G32R	Gnomad only	NA	NA	NA	31	G	31	1
826	KCNJ12	G34S	Gnomad only	NA	NA	NA	33	G	33	1
827	KCNJ12	G398R	Gnomad only	NA	NA	NA	397	S	405	0
828	KCNJ12	G398S	Gnomad only	NA	NA	NA	397	S	405	0
829	KCNJ12	G403C	Gnomad only	NA	NA	NA	NA	-	NA	0
830	KCNJ12	G403S	Gnomad only	NA	NA	NA	NA	-	NA	0
831	KCNJ12	G419S	Gnomad only	NA	NA	NA	413	S	421	0
832	KCNJ12	G420E	Gnomad only	NA	NA	NA	414	V	422	0
833	KCNJ12	G420R	Gnomad only	NA	NA	NA	414	V	422	0
834	KCNJ12	G51A	Gnomad only	NA	NA	NA	52	G	52	1
835	KCNJ12	G99R	Gnomad only	NA	NA	NA	100	G	100	1
836	KCNJ12	G99S	Gnomad only	NA	NA	NA	100	G	100	1
837	KCNJ12	H109D	Gnomad only	NA	NA	NA	110	H	110	1
838	KCNJ12	H346L	Gnomad only	NA	NA	NA	345	H	353	1
839	KCNJ12	H410N	Gnomad only	NA	NA	NA	404	P	412	0
840	KCNJ12	H410Q	Gnomad only	NA	NA	NA	404	P	412	0
841	KCNJ12	H410Y	Gnomad only	NA	NA	NA	404	P	412	0
842	KCNJ12	I233F	Gnomad only	NA	NA	NA	232	L	240	0
843	KCNJ12	I233M	Gnomad only	NA	NA	NA	232	L	240	0
844	KCNJ12	I244V	Gnomad only	NA	NA	NA	243	I	251	1
845	KCNJ12	I321F	Gnomad only	NA	NA	NA	320	I	328	1
846	KCNJ12	K234R	Gnomad only	NA	NA	NA	233	K	241	1
847	KCNJ12	L288R	Gnomad only	NA	NA	NA	287	I	295	0
848	KCNJ12	L92F	Gnomad only	NA	NA	NA	93	V	93	0
849	KCNJ12	M83T	Gnomad only	NA	NA	NA	84	M	84	1
850	KCNJ12	N217K	Gnomad only	NA	NA	NA	216	N	224	1
851	KCNJ12	N29K	Gnomad only	NA	NA	NA	28	N	28	1
852	KCNJ12	N33K	Gnomad only	NA	NA	NA	32	N	32	1
853	KCNJ12	N365K	Gnomad only	NA	NA	NA	364	K	372	0
854	KCNJ12	N379K	Gnomad only	NA	NA	NA	378	N	386	1
855	KCNJ12	P114L	Gnomad only	NA	NA	NA	115	A	115	0
856	KCNJ12	P114R	Gnomad only	NA	NA	NA	115	A	115	0
857	KCNJ12	P114S	Gnomad only	NA	NA	NA	115	A	115	0
858	KCNJ12	P122S	Clinvar & Gnomad	Uncertain significance	1050773	not provided	121	A	129	0
859	KCNJ12	P279L	Gnomad only	NA	NA	NA	278	P	286	1
860	KCNJ12	P329T	Gnomad only	NA	NA	NA	328	P	336	1
861	KCNJ12	P406H	Gnomad only	NA	NA	NA	NA	-	NA	0
862	KCNJ12	P406R	Gnomad only	NA	NA	NA	NA	-	NA	0
863	KCNJ12	Q337E	Gnomad only	NA	NA	NA	336	Y	344	0
864	KCNJ12	R120C	Gnomad only	NA	NA	NA	NA	-	NA	0
865	KCNJ12	R120H	Gnomad only	NA	NA	NA	NA	-	NA	0
866	KCNJ12	R120L	Gnomad only	NA	NA	NA	NA	-	NA	0
867	KCNJ12	R120S	Gnomad only	NA	NA	NA	NA	-	NA	0
868	KCNJ12	R149C	Gnomad only	NA	NA	NA	148	R	156	1
869	KCNJ12	R190P	Gnomad only	NA	NA	NA	189	R	197	1
870	KCNJ12	R190Q	Gnomad only	NA	NA	NA	189	R	197	1
871	KCNJ12	R190W	Gnomad only	NA	NA	NA	189	R	197	1
872	KCNJ12	R205C	Gnomad only	NA	NA	NA	204	R	212	1
873	KCNJ12	R205G	Gnomad only	NA	NA	NA	204	R	212	1
874	KCNJ12	R205S	Gnomad only	NA	NA	NA	204	R	212	1
875	KCNJ12	R214H	Gnomad only	NA	NA	NA	213	R	221	1
876	KCNJ12	R214L	Gnomad only	NA	NA	NA	213	R	221	1
877	KCNJ12	R219C	Gnomad only	NA	NA	NA	218	R	226	1
878	KCNJ12	R219S	Gnomad only	NA	NA	NA	218	R	226	1
879	KCNJ12	R229L	Gnomad only	NA	NA	NA	228	R	236	1
880	KCNJ12	R236W	Gnomad only	NA	NA	NA	235	R	243	1
881	KCNJ12	R285P	Gnomad only	NA	NA	NA	284	K	292	0
882	KCNJ12	R285Q	Gnomad only	NA	NA	NA	284	K	292	0
883	KCNJ12	R285W	Gnomad only	NA	NA	NA	284	K	292	0
884	KCNJ12	R313C	Gnomad only	NA	NA	NA	312	R	320	1
885	KCNJ12	R313G	Gnomad only	NA	NA	NA	312	R	320	1
886	KCNJ12	R326C	Gnomad only	NA	NA	NA	325	R	333	1
887	KCNJ12	R386H	Gnomad only	NA	NA	NA	385	K	393	0
888	KCNJ12	R386P	Gnomad only	NA	NA	NA	385	K	393	0
889	KCNJ12	R399Q	Gnomad only	NA	NA	NA	398	T	406	0
890	KCNJ12	R39W	Gnomad only	NA	NA	NA	40	R	40	1
891	KCNJ12	R401P	Gnomad only	NA	NA	NA	400	T	408	0
892	KCNJ12	R401Q	Gnomad only	NA	NA	NA	400	T	408	0
893	KCNJ12	R401W	Gnomad only	NA	NA	NA	400	T	408	0
894	KCNJ12	R425Q	Gnomad only	NA	NA	NA	419	R	427	1
895	KCNJ12	R425W	Gnomad only	NA	NA	NA	419	R	427	1
896	KCNJ12	R428G	Gnomad only	NA	NA	NA	422	R	430	1
897	KCNJ12	R429P	Gnomad only	NA	NA	NA	423	R	431	1
898	KCNJ12	R429Q	Gnomad only	NA	NA	NA	423	R	431	1
899	KCNJ12	R429W	Gnomad only	NA	NA	NA	423	R	431	1
900	KCNJ12	R43C	Gnomad only	NA	NA	NA	44	R	44	1
901	KCNJ12	R6G	Gnomad only	NA	NA	NA	5	R	5	1
902	KCNJ12	R6Q	Gnomad only	NA	NA	NA	5	R	5	1
903	KCNJ12	R6W	Gnomad only	NA	NA	NA	5	R	5	1
904	KCNJ12	R79C	Gnomad only	NA	NA	NA	80	R	80	1
905	KCNJ12	R79H	Gnomad only	NA	NA	NA	80	R	80	1
906	KCNJ12	R79P	Gnomad only	NA	NA	NA	80	R	80	1
907	KCNJ12	R81L	Gnomad only	NA	NA	NA	82	R	82	1
908	KCNJ12	R81Q	Gnomad only	NA	NA	NA	82	R	82	1
909	KCNJ12	R81W	Gnomad only	NA	NA	NA	82	R	82	1
910	KCNJ12	S14A	Gnomad only	NA	NA	NA	13	S	13	1
911	KCNJ12	S14P	Gnomad only	NA	NA	NA	13	S	13	1
912	KCNJ12	S221I	Gnomad only	NA	NA	NA	220	S	228	1
913	KCNJ12	S221N	Gnomad only	NA	NA	NA	220	S	228	1
914	KCNJ12	S26L	Gnomad only	NA	NA	NA	25	A	25	0
915	KCNJ12	S358I	Gnomad only	NA	NA	NA	357	S	365	1
916	KCNJ12	S358T	Gnomad only	NA	NA	NA	357	S	365	1
917	KCNJ12	S400R	Gnomad only	NA	NA	NA	399	S	407	1
918	KCNJ12	S5T	Gnomad only	NA	NA	NA	4	V	4	0
919	KCNJ12	T152M	Gnomad only	NA	NA	NA	151	T	159	1
920	KCNJ12	T193M	Gnomad only	NA	NA	NA	192	T	200	1
921	KCNJ12	T354M	Gnomad only	NA	NA	NA	353	T	361	1
922	KCNJ12	T38K	Gnomad only	NA	NA	NA	39	T	39	1
923	KCNJ12	T38M	Gnomad only	NA	NA	NA	39	T	39	1
924	KCNJ12	T74S	Gnomad only	NA	NA	NA	75	T	75	1
925	KCNJ12	V168M	Gnomad only	NA	NA	NA	167	V	175	1
926	KCNJ12	V23A	Gnomad only	NA	NA	NA	22	A	22	0
927	KCNJ12	V23L	Gnomad only	NA	NA	NA	22	A	22	0
928	KCNJ12	V296L	Gnomad only	NA	NA	NA	295	V	303	1
929	KCNJ12	V296M	Gnomad only	NA	NA	NA	295	V	303	1
930	KCNJ12	V330L	Gnomad only	NA	NA	NA	329	V	337	1
931	KCNJ12	V330M	Gnomad only	NA	NA	NA	329	V	337	1
932	KCNJ12	V363L	Gnomad only	NA	NA	NA	362	A	370	0
933	KCNJ12	V47F	Gnomad only	NA	NA	NA	48	V	48	1
934	KCNJ12	V47I	Gnomad only	NA	NA	NA	48	V	48	1
935	KCNJ12	Y338F	Gnomad only	NA	NA	NA	337	Y	345	1
936	KCNJ12	Y377C	Gnomad only	NA	NA	NA	376	Y	384	1
937	KCNJ12	Y377S	Gnomad only	NA	NA	NA	376	Y	384	1
938	KCNJ12	Y427D	Gnomad only	NA	NA	NA	421	L	429	0
939	KCNJ13	A136T	Gnomad only	NA	NA	NA	159	F	167	0
940	KCNJ13	A136V	Gnomad only	NA	NA	NA	159	F	167	0
941	KCNJ13	A158E	Gnomad only	NA	NA	NA	181	A	189	1
942	KCNJ13	A158S	Gnomad only	NA	NA	NA	181	A	189	1
943	KCNJ13	A158V	Clinvar & Gnomad	Uncertain significance	167203	not provided	181	A	189	1
944	KCNJ13	A300V	Gnomad only	NA	NA	NA	327	E	335	0
945	KCNJ13	A34S	Gnomad only	NA	NA	NA	61	V	61	0
946	KCNJ13	A39G	Gnomad only	NA	NA	NA	67	R	67	0
947	KCNJ13	A62S	Clinvar only	Uncertain significance	NA	not provided	90	L	90	0
948	KCNJ13	C131Y	Gnomad only	NA	NA	NA	154	C	162	1
949	KCNJ13	C234S	Clinvar only	Uncertain significance	NA	not provided	260	R	268	0
950	KCNJ13	C282Y	Gnomad only	NA	NA	NA	309	T	317	0
951	KCNJ13	C298R	Gnomad only	NA	NA	NA	325	R	333	0
952	KCNJ13	C6S	Gnomad only	NA	NA	NA	15	E	15	0
953	KCNJ13	C76R	Gnomad only	NA	NA	NA	104	W	104	0
954	KCNJ13	D182H	Gnomad only	NA	NA	NA	205	D	213	1
955	KCNJ13	D24Y	Gnomad only	NA	NA	NA	51	D	51	1
956	KCNJ13	D50V	Gnomad only	NA	NA	NA	78	D	78	1
957	KCNJ13	D90G	Gnomad only	NA	NA	NA	116	S	124	0
958	KCNJ13	E131K	Gnomad only	NA	NA	NA	154	C	162	0
959	KCNJ13	E149G	Gnomad only	NA	NA	NA	172	D	180	0
960	KCNJ13	E180G	Clinvar only	Uncertain significance	NA	not provided	203	M	211	0
961	KCNJ13	E211G	Clinvar only	Uncertain significance	NA	not provided	234	S	242	0
962	KCNJ13	E233K	Gnomad only	NA	NA	NA	259	D	267	0
963	KCNJ13	E260A	Clinvar only	Benign	NA	not provided	286	D	294	0
964	KCNJ13	E260K	Gnomad only	NA	NA	NA	286	D	294	0
965	KCNJ13	E276A	Gnomad only	NA	1169670	NA	303	E	311	1
966	KCNJ13	E280K	Gnomad only	NA	NA	NA	307	M	315	0
967	KCNJ13	E316K	Gnomad only	NA	NA	NA	342	S	350	0
968	KCNJ13	E355D	Gnomad only	NA	NA	NA	418	P	426	0
969	KCNJ13	E355G	Gnomad only	NA	NA	NA	418	P	426	0
970	KCNJ13	E80K	Clinvar & Gnomad	Conflicting interpretations of pathogenicity	335057	Leber congenital amaurosis 16|not provided	108	L	108	0
971	KCNJ13	F156Y	Clinvar only	Uncertain significance	NA	not provided	179	V	187	0
972	KCNJ13	F236Y	Gnomad only	NA	999076	NA	262	F	270	1
973	KCNJ13	F237L	Clinvar only	Uncertain significance	NA	not provided	263	L	271	0
974	KCNJ13	F270L	Gnomad only	NA	NA	NA	297	I	305	0
975	KCNJ13	F270S	Gnomad only	NA	NA	NA	297	I	305	0
976	KCNJ13	F318S	Gnomad only	NA	NA	NA	344	F	352	1
977	KCNJ13	F77L	Gnomad only	NA	NA	NA	105	L	105	0
978	KCNJ13	G123R	Gnomad only	NA	NA	NA	146	G	154	1
979	KCNJ13	G183D	Clinvar only	Uncertain significance	NA	Leber congenital amaurosis 16	206	G	214	1
980	KCNJ13	G215A	Gnomad only	NA	NA	NA	238	S	246	0
981	KCNJ13	G228D	Gnomad only	NA	NA	NA	NA	-	NA	0
982	KCNJ13	G25D	Gnomad only	NA	NA	NA	52	G	52	1
983	KCNJ13	G306V	Gnomad only	NA	NA	NA	NA	-	NA	0
984	KCNJ13	G83D	Gnomad only	NA	NA	NA	111	G	111	1
985	KCNJ13	G83S	Gnomad only	NA	NA	NA	111	G	111	1
986	KCNJ13	H296Q	Gnomad only	NA	NA	NA	323	G	331	0
987	KCNJ13	H296Y	Gnomad only	NA	NA	NA	323	G	331	0
988	KCNJ13	I120T	Clinvar & Gnomad	Pathogenic	191155	Leber congenital amaurosis 16|not provided	143	I	151	1
989	KCNJ13	I120V	Gnomad only	NA	NA	NA	143	I	151	1
990	KCNJ13	I140T	Gnomad only	NA	NA	NA	163	F	171	0
991	KCNJ13	I160N	Gnomad only	NA	NA	NA	183	M	191	0
992	KCNJ13	I160T	Clinvar & Gnomad	Uncertain significance	1014231	not provided	183	M	191	0
993	KCNJ13	I188T	Gnomad only	NA	NA	NA	211	M	219	0
994	KCNJ13	I238F	Gnomad only	NA	NA	NA	264	V	272	0
995	KCNJ13	I348T	Clinvar & Gnomad	Uncertain significance	1040258	not provided	411	Q	419	0
996	KCNJ13	I47T	Gnomad only	NA	NA	NA	75	T	75	0
997	KCNJ13	I98F	Gnomad only	NA	NA	NA	121	A	129	0
998	KCNJ13	I98V	Gnomad only	NA	NA	NA	121	A	129	0
999	KCNJ13	I9M	Clinvar & Gnomad	Uncertain significance	866179	Retinal dystrophy	18	G	18	0
1000	KCNJ13	I9T	Gnomad only	NA	NA	NA	18	G	18	0
1001	KCNJ13	K216I	Gnomad only	NA	NA	NA	239	E	247	0
1002	KCNJ13	K216N	Gnomad only	NA	NA	NA	239	E	247	0
1003	KCNJ13	K23N	Clinvar only	Uncertain significance	NA	not provided	50	K	50	1
1004	KCNJ13	K7N	Gnomad only	NA	NA	NA	16	E	16	0
1005	KCNJ13	K7R	Gnomad only	NA	NA	NA	16	E	16	0
1006	KCNJ13	L114P	Clinvar only	Uncertain significance	NA	Retinal dystrophy|not provided	137	I	145	0
1007	KCNJ13	L144P	Clinvar & Gnomad	Uncertain significance	916717	Leber congenital amaurosis 16	167	V	175	0
1008	KCNJ13	L187V	Gnomad only	NA	NA	NA	210	L	218	1
1009	KCNJ13	L208F	Gnomad only	NA	NA	NA	231	L	239	1
1010	KCNJ13	L208V	Clinvar only	Uncertain significance	NA	not provided	231	L	239	1
1011	KCNJ13	L241P	Clinvar only	Pathogenic	NA	Leber congenital amaurosis 16	267	I	275	0
1012	KCNJ13	L241Q	Clinvar & Gnomad	Uncertain significance	1025287	not provided	267	I	275	0
1013	KCNJ13	L257F	Gnomad only	NA	NA	NA	283	S	291	0
1014	KCNJ13	L289P	Clinvar only	Uncertain significance	NA	not provided	316	L	324	1
1015	KCNJ13	L29F	Gnomad only	NA	NA	NA	56	V	56	0
1016	KCNJ13	L302P	Clinvar & Gnomad	Uncertain significance	844853	not provided	329	V	337	0
1017	KCNJ13	L329V	Gnomad only	NA	NA	NA	355	L	363	1
1018	KCNJ13	L38V	Gnomad only	NA	NA	NA	66	Q	66	0
1019	KCNJ13	L93F	Gnomad only	NA	NA	NA	119	G	127	0
1020	KCNJ13	M181T	Gnomad only	NA	NA	NA	204	R	212	0
1021	KCNJ13	M181V	Gnomad only	NA	NA	NA	204	R	212	0
1022	KCNJ13	M1T	Clinvar only	Uncertain significance	NA	Leber congenital amaurosis 16	10	S	10	0
1023	KCNJ13	M274I	Gnomad only	NA	NA	NA	301	M	309	1
1024	KCNJ13	M274T	Gnomad only	NA	NA	NA	301	M	309	1
1025	KCNJ13	M31I	Gnomad only	NA	NA	NA	58	F	58	0
1026	KCNJ13	M49T	Gnomad only	NA	NA	NA	77	V	77	0
1027	KCNJ13	M51T	Gnomad only	NA	NA	NA	79	I	79	0
1028	KCNJ13	M51V	Gnomad only	NA	NA	NA	79	I	79	0
1029	KCNJ13	M57I	Gnomad only	NA	NA	NA	85	L	85	0
1030	KCNJ13	M57T	Gnomad only	NA	NA	NA	85	L	85	0
1031	KCNJ13	N186K	Clinvar only	Uncertain significance	NA	not provided	209	C	217	0
1032	KCNJ13	N186T	Gnomad only	NA	NA	NA	209	C	217	0
1033	KCNJ13	N261H	Clinvar & Gnomad	Uncertain significance	971274	not provided	288	D	296	0
1034	KCNJ13	N82I	Gnomad only	NA	NA	NA	110	H	110	0
1035	KCNJ13	P127S	Clinvar only	Uncertain significance	NA	not provided	150	V	158	0
1036	KCNJ13	P135S	Gnomad only	NA	NA	NA	158	V	166	0
1037	KCNJ13	P185L	Gnomad only	NA	NA	NA	208	L	216	0
1038	KCNJ13	P196A	Gnomad only	NA	NA	NA	219	K	227	0
1039	KCNJ13	P198T	Gnomad only	NA	NA	NA	221	H	229	0
1040	KCNJ13	P249S	Gnomad only	NA	NA	NA	275	E	283	0
1041	KCNJ13	P290A	Gnomad only	NA	NA	NA	317	A	325	0
1042	KCNJ13	P290L	Gnomad only	NA	NA	NA	317	A	325	0
1043	KCNJ13	P323A	Gnomad only	NA	NA	NA	349	E	357	0
1044	KCNJ13	P326S	Gnomad only	NA	NA	NA	352	N	360	0
1045	KCNJ13	P334S	Gnomad only	NA	NA	NA	385	K	393	0
1046	KCNJ13	Q210R	Gnomad only	NA	NA	NA	233	K	241	0
1047	KCNJ13	Q258H	Gnomad only	NA	NA	NA	284	K	292	0
1048	KCNJ13	Q352H	Gnomad only	NA	NA	NA	415	P	423	0
1049	KCNJ13	R162P	Gnomad only	NA	NA	NA	185	K	193	0
1050	KCNJ13	R162Q	Clinvar & Gnomad	Uncertain significance	899321	not provided|Leber congenital amaurosis 16	185	K	193	0
1051	KCNJ13	R162W	Clinvar & Gnomad	Pathogenic	6585	not provided|Snowflake vitreoretinal degeneration	185	K	193	0
1052	KCNJ13	R166G	Gnomad only	NA	NA	NA	189	R	197	1
1053	KCNJ13	R16K	Gnomad only	NA	NA	NA	43	C	43	0
1054	KCNJ13	R171C	Gnomad only	NA	NA	NA	194	V	202	0
1055	KCNJ13	R171H	Gnomad only	NA	NA	NA	194	V	202	0
1056	KCNJ13	R18Q	Clinvar & Gnomad	Uncertain significance	842121	not provided	45	S	45	0
1057	KCNJ13	R18W	Gnomad only	NA	NA	NA	45	S	45	0
1058	KCNJ13	R195Q	Clinvar only	Uncertain significance	NA	not provided|Snowflake vitreoretinal degeneration	218	R	226	1
1059	KCNJ13	R203Q	Clinvar only	Uncertain significance	NA	not provided	226	H	234	0
1060	KCNJ13	R203W	Gnomad only	NA	NA	NA	226	H	234	0
1061	KCNJ13	R212S	Gnomad only	NA	NA	NA	235	R	243	1
1062	KCNJ13	R305Q	Gnomad only	NA	NA	NA	332	E	340	0
1063	KCNJ13	R336K	Gnomad only	NA	NA	NA	387	E	395	0
1064	KCNJ13	R336S	Gnomad only	NA	NA	NA	387	E	395	0
1065	KCNJ13	R36G	Gnomad only	NA	NA	NA	64	K	64	0
1066	KCNJ13	R42P	Clinvar only	Uncertain significance	NA	Leber congenital amaurosis 16	70	A	70	0
1067	KCNJ13	R54H	Clinvar only	Uncertain significance	NA	not provided	82	R	82	1
1068	KCNJ13	S105I	Clinvar only	Pathogenic	NA	Leber congenital amaurosis 16	128	S	136	1
1069	KCNJ13	S230I	Gnomad only	NA	NA	NA	256	S	264	1
1070	KCNJ13	S230N	Clinvar & Gnomad	Uncertain significance	335053	Leber congenital amaurosis 16|not provided	256	S	264	1
1071	KCNJ13	S231F	Gnomad only	NA	NA	NA	257	G	265	0
1072	KCNJ13	S301T	Gnomad only	NA	NA	NA	328	P	336	0
1073	KCNJ13	S301Y	Gnomad only	NA	NA	NA	328	P	336	0
1074	KCNJ13	S333N	Gnomad only	NA	NA	NA	384	S	392	1
1075	KCNJ13	S88G	Gnomad only	NA	NA	NA	NA	-	NA	0
1076	KCNJ13	T124I	Gnomad only	NA	NA	NA	147	F	155	0
1077	KCNJ13	T153I	Clinvar only	Pathogenic	NA	Leber congenital amaurosis|Leber congenital amaurosis 16	176	I	184	0
1078	KCNJ13	T175I	Clinvar & Gnomad	Benign	335056	Leber congenital amaurosis 16|not provided	198	N	206	0
1079	KCNJ13	T220I	Gnomad only	NA	NA	NA	248	I	256	0
1080	KCNJ13	T242M	Gnomad only	NA	NA	NA	268	T	276	1
1081	KCNJ13	T321A	Gnomad only	NA	NA	NA	347	T	355	1
1082	KCNJ13	T327A	Clinvar only	Uncertain significance	NA	not provided	353	T	361	1
1083	KCNJ13	T337I	Clinvar only	Uncertain significance	NA	not provided	388	D	396	0
1084	KCNJ13	T359R	Gnomad only	NA	NA	NA	422	R	430	0
1085	KCNJ13	V137I	Gnomad only	NA	899320	NA	160	M	168	0
1086	KCNJ13	V177I	Gnomad only	NA	NA	NA	200	V	208	1
1087	KCNJ13	V178A	Gnomad only	NA	NA	NA	201	I	209	0
1088	KCNJ13	V207A	Gnomad only	NA	NA	NA	230	Q	238	0
1089	KCNJ13	V268A	Clinvar & Gnomad	Uncertain significance	1023971	not provided	295	V	303	1
1090	KCNJ13	V322A	Clinvar only	Uncertain significance	NA	not provided	348	Y	356	0
1091	KCNJ13	V65F	Gnomad only	NA	NA	NA	93	V	93	1
1092	KCNJ13	V8L	Clinvar & Gnomad	Uncertain significance	953725	not provided	17	D	17	0
1093	KCNJ13	W45S	Clinvar only	Uncertain significance	NA	not provided	73	F	73	0
1094	KCNJ13	Y102C	Clinvar & Gnomad	Uncertain significance	1017594	not provided	125	E	133	0
1095	KCNJ13	Y17H	Gnomad only	NA	NA	NA	44	R	44	0
1096	KCNJ13	Y209H	Gnomad only	NA	NA	NA	232	L	240	0
1097	KCNJ13	Y218C	Gnomad only	NA	NA	NA	246	D	254	0
1098	KCNJ13	Y218H	Clinvar & Gnomad	Uncertain significance	1043797	not provided	246	D	254	0
1099	KCNJ13	Y244F	Gnomad only	NA	NA	NA	270	V	278	0
1100	KCNJ13	Y244H	Gnomad only	NA	NA	NA	270	V	278	0
1101	KCNJ14	A112V	Gnomad only	NA	NA	NA	107	A	107	1
1102	KCNJ14	A119P	Gnomad only	NA	NA	NA	114	D	114	0
1103	KCNJ14	A119T	Gnomad only	NA	NA	NA	114	D	114	0
1104	KCNJ14	A120G	Gnomad only	NA	NA	NA	115	A	115	1
1105	KCNJ14	A120T	Gnomad only	NA	NA	NA	115	A	115	1
1106	KCNJ14	A125P	Gnomad only	NA	NA	NA	120	K	128	0
1107	KCNJ14	A137S	Gnomad only	NA	NA	NA	132	A	140	1
1108	KCNJ14	A141T	Gnomad only	NA	NA	NA	136	S	144	0
1109	KCNJ14	A161D	Gnomad only	NA	NA	NA	156	I	164	0
1110	KCNJ14	A162V	Gnomad only	NA	NA	NA	157	A	165	1
1111	KCNJ14	A165T	Gnomad only	NA	NA	NA	160	M	168	0
1112	KCNJ14	A165V	Gnomad only	NA	NA	NA	160	M	168	0
1113	KCNJ14	A186T	Gnomad only	NA	NA	NA	181	A	189	1
1114	KCNJ14	A189D	Gnomad only	NA	NA	NA	184	A	192	1
1115	KCNJ14	A207V	Gnomad only	NA	NA	NA	202	A	210	1
1116	KCNJ14	A21V	Gnomad only	NA	NA	NA	11	I	11	0
1117	KCNJ14	A230D	Gnomad only	NA	NA	NA	225	A	233	1
1118	KCNJ14	A230T	Gnomad only	NA	NA	NA	225	A	233	1
1119	KCNJ14	A230V	Gnomad only	NA	NA	NA	225	A	233	1
1120	KCNJ14	A234S	Gnomad only	NA	NA	NA	229	A	237	1
1121	KCNJ14	A281V	Gnomad only	NA	NA	NA	276	D	284	0
1122	KCNJ14	A295D	Gnomad only	NA	NA	NA	290	A	298	1
1123	KCNJ14	A311V	Gnomad only	NA	NA	NA	306	A	314	1
1124	KCNJ14	A363P	Gnomad only	NA	NA	NA	358	A	366	1
1125	KCNJ14	A363S	Gnomad only	NA	NA	NA	358	A	366	1
1126	KCNJ14	A363V	Gnomad only	NA	NA	NA	358	A	366	1
1127	KCNJ14	A370V	Gnomad only	NA	NA	NA	NA	-	NA	0
1128	KCNJ14	A37G	Gnomad only	NA	NA	NA	27	A	27	1
1129	KCNJ14	A39G	Gnomad only	NA	NA	NA	29	G	29	0
1130	KCNJ14	A431V	Gnomad only	NA	NA	NA	426	E	434	0
1131	KCNJ14	A6V	Gnomad only	NA	NA	NA	NA	-	NA	0
1132	KCNJ14	A71T	Gnomad only	NA	NA	NA	66	Q	66	0
1133	KCNJ14	C214R	Gnomad only	NA	NA	NA	209	C	217	1
1134	KCNJ14	C361F	Gnomad only	NA	NA	NA	356	C	364	1
1135	KCNJ14	C389R	Gnomad only	NA	NA	NA	375	C	383	1
1136	KCNJ14	C389Y	Gnomad only	NA	NA	NA	375	C	383	1
1137	KCNJ14	C81G	Gnomad only	NA	NA	NA	76	C	76	1
1138	KCNJ14	C81R	Gnomad only	NA	NA	NA	76	C	76	1
1139	KCNJ14	C95F	Gnomad only	NA	NA	NA	90	L	90	0
1140	KCNJ14	C95S	Gnomad only	NA	NA	NA	90	L	90	0
1141	KCNJ14	D117H	Gnomad only	NA	NA	NA	112	D	112	1
1142	KCNJ14	D18G	Gnomad only	NA	NA	NA	8	R	8	0
1143	KCNJ14	D254E	Gnomad only	NA	NA	NA	249	D	257	1
1144	KCNJ14	D264N	Gnomad only	NA	NA	NA	259	D	267	1
1145	KCNJ14	D279N	Gnomad only	NA	NA	NA	274	D	282	1
1146	KCNJ14	D345N	Gnomad only	NA	NA	NA	340	D	348	1
1147	KCNJ14	D367H	Gnomad only	NA	NA	NA	362	A	370	0
1148	KCNJ14	D367N	Gnomad only	NA	NA	NA	362	A	370	0
1149	KCNJ14	D403N	Gnomad only	NA	NA	NA	389	D	397	1
1150	KCNJ14	D405Y	Gnomad only	NA	NA	NA	391	E	399	0
1151	KCNJ14	D406N	Gnomad only	NA	NA	NA	392	N	400	0
1152	KCNJ14	D56E	Gnomad only	NA	NA	NA	51	D	51	1
1153	KCNJ14	D76E	Gnomad only	NA	NA	NA	71	D	71	1
1154	KCNJ14	D83Y	Gnomad only	NA	NA	NA	78	D	78	1
1155	KCNJ14	E143Q	Gnomad only	NA	NA	NA	138	E	146	1
1156	KCNJ14	E158K	Gnomad only	NA	NA	NA	153	E	161	1
1157	KCNJ14	E196A	Gnomad only	NA	NA	NA	191	E	199	1
1158	KCNJ14	E196K	Gnomad only	NA	NA	NA	191	E	199	1
1159	KCNJ14	E244K	Gnomad only	NA	NA	NA	239	E	247	1
1160	KCNJ14	E246G	Gnomad only	NA	NA	NA	241	E	249	1
1161	KCNJ14	E24K	Gnomad only	NA	NA	NA	14	S	14	0
1162	KCNJ14	E277D	Gnomad only	NA	NA	NA	272	E	280	1
1163	KCNJ14	E291K	Gnomad only	NA	NA	NA	286	D	294	0
1164	KCNJ14	E291V	Gnomad only	NA	NA	NA	286	D	294	0
1165	KCNJ14	E324K	Gnomad only	NA	NA	NA	319	E	327	1
1166	KCNJ14	E332K	Gnomad only	NA	NA	NA	327	E	335	1
1167	KCNJ14	E365A	Gnomad only	NA	NA	NA	360	D	368	0
1168	KCNJ14	E365K	Gnomad only	NA	NA	NA	360	D	368	0
1169	KCNJ14	E371G	Gnomad only	NA	NA	NA	NA	-	NA	0
1170	KCNJ14	E391K	Gnomad only	NA	NA	NA	377	E	385	1
1171	KCNJ14	E393K	Gnomad only	NA	NA	NA	379	E	387	1
1172	KCNJ14	E401A	Gnomad only	NA	NA	NA	387	E	395	1
1173	KCNJ14	E402K	Gnomad only	NA	NA	NA	388	D	396	0
1174	KCNJ14	E404D	Gnomad only	NA	NA	NA	390	S	398	0
1175	KCNJ14	E409Q	Gnomad only	NA	NA	NA	404	P	412	0
1176	KCNJ14	F108L	Gnomad only	NA	NA	NA	103	F	103	1
1177	KCNJ14	F128L	Gnomad only	NA	NA	NA	123	V	131	0
1178	KCNJ14	F138L	Gnomad only	NA	NA	NA	133	F	141	1
1179	KCNJ14	F200S	Gnomad only	NA	NA	NA	195	F	203	1
1180	KCNJ14	F297S	Gnomad only	NA	NA	NA	292	F	300	1
1181	KCNJ14	F336L	Gnomad only	NA	NA	NA	331	F	339	1
1182	KCNJ14	F63C	Gnomad only	NA	NA	NA	58	F	58	1
1183	KCNJ14	G105S	Gnomad only	NA	NA	NA	100	G	100	1
1184	KCNJ14	G116R	Gnomad only	NA	NA	NA	111	G	111	1
1185	KCNJ14	G116S	Gnomad only	NA	NA	NA	111	G	111	1
1186	KCNJ14	G149A	Gnomad only	NA	NA	NA	144	G	152	1
1187	KCNJ14	G173S	Gnomad only	NA	NA	NA	168	G	176	1
1188	KCNJ14	G220D	Gnomad only	NA	NA	NA	215	G	223	1
1189	KCNJ14	G245D	Gnomad only	NA	NA	NA	240	G	248	1
1190	KCNJ14	G258A	Gnomad only	NA	NA	NA	253	G	261	1
1191	KCNJ14	G258D	Gnomad only	NA	NA	NA	253	G	261	1
1192	KCNJ14	G261R	Gnomad only	NA	NA	NA	256	S	264	0
1193	KCNJ14	G262S	Gnomad only	NA	NA	NA	257	G	265	1
1194	KCNJ14	G28R	Gnomad only	NA	NA	NA	18	G	18	1
1195	KCNJ14	G30A	Gnomad only	NA	NA	NA	20	K	20	0
1196	KCNJ14	G30R	Gnomad only	NA	NA	NA	20	K	20	0
1197	KCNJ14	G339C	Gnomad only	NA	NA	NA	334	K	342	0
1198	KCNJ14	G339S	Gnomad only	NA	NA	NA	334	K	342	0
1199	KCNJ14	G339V	Gnomad only	NA	NA	NA	334	K	342	0
1200	KCNJ14	G357R	Gnomad only	NA	NA	NA	352	N	360	0
1201	KCNJ14	G383S	Gnomad only	NA	NA	NA	369	S	377	0
1202	KCNJ14	G67S	Gnomad only	NA	NA	NA	62	G	62	1
1203	KCNJ14	G68A	Gnomad only	NA	NA	NA	63	E	63	0
1204	KCNJ14	G70D	Gnomad only	NA	NA	NA	65	G	65	1
1205	KCNJ14	H115Q	Gnomad only	NA	NA	NA	110	H	110	1
1206	KCNJ14	H130P	Gnomad only	NA	NA	NA	125	E	133	0
1207	KCNJ14	H130Y	Gnomad only	NA	NA	NA	125	E	133	0
1208	KCNJ14	H211Y	Gnomad only	NA	NA	NA	206	G	214	0
1209	KCNJ14	H231Q	Gnomad only	NA	NA	NA	226	H	234	1
1210	KCNJ14	H350L	Gnomad only	NA	NA	NA	345	H	353	1
1211	KCNJ14	H350R	Gnomad only	NA	NA	NA	345	H	353	1
1212	KCNJ14	H375R	Gnomad only	NA	NA	NA	366	Y	374	0
1213	KCNJ14	I111F	Gnomad only	NA	NA	NA	106	I	106	1
1214	KCNJ14	I111T	Gnomad only	NA	NA	NA	106	I	106	1
1215	KCNJ14	I111V	Gnomad only	NA	NA	NA	106	I	106	1
1216	KCNJ14	I171M	Gnomad only	NA	NA	NA	166	I	174	1
1217	KCNJ14	I266V	Gnomad only	NA	NA	NA	261	I	269	1
1218	KCNJ14	I272V	Gnomad only	NA	NA	NA	267	I	275	1
1219	KCNJ14	I274T	Gnomad only	NA	NA	NA	269	I	277	1
1220	KCNJ14	I278M	Gnomad only	NA	NA	NA	273	I	281	1
1221	KCNJ14	K190R	Gnomad only	NA	NA	NA	185	K	193	1
1222	KCNJ14	K193R	Gnomad only	NA	NA	NA	188	K	196	1
1223	KCNJ14	K364M	Gnomad only	NA	NA	NA	359	R	367	0
1224	KCNJ14	K364N	Gnomad only	NA	NA	NA	359	R	367	0
1225	KCNJ14	K378E	Gnomad only	NA	NA	NA	NA	-	NA	0
1226	KCNJ14	K378Q	Gnomad only	NA	NA	NA	NA	-	NA	0
1227	KCNJ14	K54T	Gnomad only	NA	NA	NA	49	K	49	1
1228	KCNJ14	K55E	Gnomad only	NA	NA	NA	50	K	50	1
1229	KCNJ14	L102P	Gnomad only	NA	NA	NA	97	L	97	1
1230	KCNJ14	L10F	Gnomad only	NA	NA	NA	NA	-	NA	0
1231	KCNJ14	L10V	Gnomad only	NA	NA	NA	NA	-	NA	0
1232	KCNJ14	L114R	Gnomad only	NA	NA	NA	109	L	109	1
1233	KCNJ14	L114V	Gnomad only	NA	NA	NA	109	L	109	1
1234	KCNJ14	L118V	Gnomad only	NA	NA	NA	113	L	113	1
1235	KCNJ14	L139H	Gnomad only	NA	NA	NA	134	L	142	1
1236	KCNJ14	L198Q	Gnomad only	NA	NA	NA	193	L	201	1
1237	KCNJ14	L198V	Gnomad only	NA	NA	NA	193	L	201	1
1238	KCNJ14	L215V	Gnomad only	NA	NA	NA	210	L	218	1
1239	KCNJ14	L222M	Gnomad only	NA	NA	NA	217	L	225	1
1240	KCNJ14	L222V	Gnomad only	NA	NA	NA	217	L	225	1
1241	KCNJ14	L236V	Gnomad only	NA	NA	NA	231	L	239	1
1242	KCNJ14	L268F	Gnomad only	NA	NA	NA	263	L	271	1
1243	KCNJ14	L268V	Gnomad only	NA	NA	NA	263	L	271	1
1244	KCNJ14	L292R	Gnomad only	NA	NA	NA	287	I	295	0
1245	KCNJ14	L303V	Gnomad only	NA	NA	NA	298	L	306	1
1246	KCNJ14	L31M	Gnomad only	NA	NA	NA	21	L	21	1
1247	KCNJ14	L321F	Gnomad only	NA	NA	NA	316	L	324	1
1248	KCNJ14	L335P	Gnomad only	NA	NA	NA	330	L	338	1
1249	KCNJ14	L74V	Gnomad only	NA	NA	NA	69	L	69	1
1250	KCNJ14	L77P	Gnomad only	NA	NA	NA	72	I	72	0
1251	KCNJ14	L92P	Gnomad only	NA	NA	NA	87	I	87	0
1252	KCNJ14	M216L	Gnomad only	NA	NA	NA	211	M	219	1
1253	KCNJ14	M312I	Gnomad only	NA	NA	NA	307	M	315	1
1254	KCNJ14	M89I	Gnomad only	NA	NA	NA	84	M	84	1
1255	KCNJ14	N195K	Gnomad only	NA	NA	NA	190	N	198	1
1256	KCNJ14	N65I	Gnomad only	NA	NA	NA	60	N	60	1
1257	KCNJ14	P121L	Gnomad only	NA	NA	NA	116	S	124	0
1258	KCNJ14	P121R	Gnomad only	NA	NA	NA	116	S	124	0
1259	KCNJ14	P123S	Gnomad only	NA	NA	NA	118	E	126	0
1260	KCNJ14	P124L	Gnomad only	NA	NA	NA	119	G	127	0
1261	KCNJ14	P239T	Gnomad only	NA	NA	NA	234	S	242	0
1262	KCNJ14	P249L	Gnomad only	NA	NA	NA	244	P	252	1
1263	KCNJ14	P271L	Gnomad only	NA	NA	NA	266	P	274	1
1264	KCNJ14	P271R	Gnomad only	NA	NA	NA	266	P	274	1
1265	KCNJ14	P271S	Gnomad only	NA	NA	NA	266	P	274	1
1266	KCNJ14	P333A	Gnomad only	NA	NA	NA	328	P	336	1
1267	KCNJ14	P356T	Gnomad only	NA	NA	NA	351	P	359	1
1268	KCNJ14	P359L	Gnomad only	NA	NA	NA	354	P	362	1
1269	KCNJ14	P359S	Gnomad only	NA	NA	NA	354	P	362	1
1270	KCNJ14	P428L	Gnomad only	NA	NA	NA	423	R	431	0
1271	KCNJ14	P428T	Gnomad only	NA	NA	NA	423	R	431	0
1272	KCNJ14	P435L	Gnomad only	NA	NA	NA	NA	-	NA	0
1273	KCNJ14	P435S	Gnomad only	NA	NA	NA	NA	-	NA	0
1274	KCNJ14	P436L	Gnomad only	NA	NA	NA	NA	-	NA	0
1275	KCNJ14	P436S	Gnomad only	NA	NA	NA	NA	-	NA	0
1276	KCNJ14	P44S	Gnomad only	NA	NA	NA	34	K	34	0
1277	KCNJ14	Q337L	Gnomad only	NA	NA	NA	332	E	340	0
1278	KCNJ14	Q341K	Gnomad only	NA	NA	NA	336	Y	344	0
1279	KCNJ14	Q372H	Gnomad only	NA	NA	NA	NA	-	NA	0
1280	KCNJ14	R153H	Gnomad only	NA	NA	NA	148	R	156	1
1281	KCNJ14	R153S	Gnomad only	NA	NA	NA	148	R	156	1
1282	KCNJ14	R194H	Gnomad only	NA	NA	NA	189	R	197	1
1283	KCNJ14	R20W	Gnomad only	NA	NA	NA	10	S	10	0
1284	KCNJ14	R212C	Gnomad only	NA	NA	NA	207	K	215	0
1285	KCNJ14	R223S	Gnomad only	NA	NA	NA	218	R	226	1
1286	KCNJ14	R233C	Gnomad only	NA	NA	NA	228	R	236	1
1287	KCNJ14	R240H	Gnomad only	NA	NA	NA	235	R	243	1
1288	KCNJ14	R265C	Gnomad only	NA	NA	NA	260	R	268	1
1289	KCNJ14	R289C	Gnomad only	NA	NA	NA	284	K	292	0
1290	KCNJ14	R289H	Gnomad only	NA	NA	NA	284	K	292	0
1291	KCNJ14	R317H	Gnomad only	NA	NA	NA	312	R	320	1
1292	KCNJ14	R317S	Gnomad only	NA	NA	NA	312	R	320	1
1293	KCNJ14	R330C	Gnomad only	NA	NA	NA	325	R	333	1
1294	KCNJ14	R330H	Gnomad only	NA	NA	NA	325	R	333	1
1295	KCNJ14	R330L	Gnomad only	NA	NA	NA	325	R	333	1
1296	KCNJ14	R330S	Gnomad only	NA	NA	NA	325	R	333	1
1297	KCNJ14	R338C	Gnomad only	NA	NA	NA	333	E	341	0
1298	KCNJ14	R338H	Gnomad only	NA	NA	NA	333	E	341	0
1299	KCNJ14	R33H	Gnomad only	NA	NA	NA	23	T	23	0
1300	KCNJ14	R33S	Gnomad only	NA	NA	NA	23	T	23	0
1301	KCNJ14	R347C	Gnomad only	NA	NA	NA	342	S	350	0
1302	KCNJ14	R347H	Gnomad only	NA	NA	NA	342	S	350	0
1303	KCNJ14	R351C	Gnomad only	NA	NA	NA	346	K	354	0
1304	KCNJ14	R351H	Gnomad only	NA	NA	NA	346	K	354	0
1305	KCNJ14	R369Q	Gnomad only	NA	NA	NA	364	K	372	0
1306	KCNJ14	R369W	Gnomad only	NA	NA	NA	364	K	372	0
1307	KCNJ14	R424G	Gnomad only	NA	NA	NA	419	R	427	1
1308	KCNJ14	R424P	Gnomad only	NA	NA	NA	419	R	427	1
1309	KCNJ14	R424Q	Gnomad only	NA	NA	NA	419	R	427	1
1310	KCNJ14	R47P	Gnomad only	NA	NA	NA	42	Q	42	0
1311	KCNJ14	R47Q	Gnomad only	NA	NA	NA	42	Q	42	0
1312	KCNJ14	R5S	Gnomad only	NA	NA	NA	NA	-	NA	0
1313	KCNJ14	R62C	Gnomad only	NA	NA	NA	57	Q	57	0
1314	KCNJ14	R62H	Gnomad only	NA	NA	NA	57	Q	57	0
1315	KCNJ14	R72C	Gnomad only	NA	NA	NA	67	R	67	1
1316	KCNJ14	R72H	Gnomad only	NA	NA	NA	67	R	67	1
1317	KCNJ14	R87H	Gnomad only	NA	NA	NA	82	R	82	1
1318	KCNJ14	S129L	Gnomad only	NA	NA	NA	124	S	132	1
1319	KCNJ14	S147Y	Gnomad only	NA	NA	NA	142	T	150	0
1320	KCNJ14	S19I	Gnomad only	NA	NA	NA	9	Y	9	0
1321	KCNJ14	S19N	Gnomad only	NA	NA	NA	9	Y	9	0
1322	KCNJ14	S201R	Gnomad only	NA	NA	NA	196	S	204	1
1323	KCNJ14	S270F	Gnomad only	NA	NA	NA	265	S	273	1
1324	KCNJ14	S282G	Gnomad only	NA	NA	NA	277	S	285	1
1325	KCNJ14	S318L	Gnomad only	NA	NA	NA	313	S	321	1
1326	KCNJ14	S318P	Gnomad only	NA	NA	NA	313	S	321	1
1327	KCNJ14	S319P	Gnomad only	NA	NA	NA	314	S	322	1
1328	KCNJ14	S340C	Gnomad only	NA	NA	NA	335	H	343	0
1329	KCNJ14	S340F	Gnomad only	NA	NA	NA	335	H	343	0
1330	KCNJ14	S376N	Gnomad only	NA	NA	NA	367	I	375	0
1331	KCNJ14	S379P	Gnomad only	NA	NA	NA	NA	-	NA	0
1332	KCNJ14	S384F	Gnomad only	NA	NA	NA	370	N	378	0
1333	KCNJ14	S75N	Gnomad only	NA	NA	NA	70	A	70	0
1334	KCNJ14	S75T	Gnomad only	NA	NA	NA	70	A	70	0
1335	KCNJ14	S96A	Gnomad only	NA	NA	NA	91	A	91	0
1336	KCNJ14	S96F	Gnomad only	NA	NA	NA	91	A	91	0
1337	KCNJ14	T144M	Gnomad only	NA	NA	NA	139	T	147	1
1338	KCNJ14	T242N	Gnomad only	NA	NA	NA	237	T	245	1
1339	KCNJ14	T263I	Gnomad only	NA	NA	NA	258	I	266	0
1340	KCNJ14	T263N	Gnomad only	NA	NA	NA	258	I	266	0
1341	KCNJ14	T273S	Gnomad only	NA	NA	NA	268	T	276	1
1342	KCNJ14	T313A	Gnomad only	NA	NA	NA	308	T	316	1
1343	KCNJ14	T313N	Gnomad only	NA	NA	NA	308	T	316	1
1344	KCNJ14	T427I	Gnomad only	NA	NA	NA	422	R	430	0
1345	KCNJ14	T433N	Gnomad only	NA	NA	NA	NA	-	NA	0
1346	KCNJ14	T80A	Gnomad only	NA	NA	NA	75	T	75	1
1347	KCNJ14	V131M	Gnomad only	NA	NA	NA	126	V	134	1
1348	KCNJ14	V155I	Gnomad only	NA	NA	NA	150	V	158	1
1349	KCNJ14	V166A	Gnomad only	NA	NA	NA	161	V	169	1
1350	KCNJ14	V175M	Gnomad only	NA	NA	NA	170	I	178	0
1351	KCNJ14	V180A	Gnomad only	NA	NA	NA	175	I	183	0
1352	KCNJ14	V199I	Gnomad only	NA	NA	NA	194	V	202	1
1353	KCNJ14	V205I	Gnomad only	NA	NA	NA	200	V	208	1
1354	KCNJ14	V228L	Gnomad only	NA	NA	NA	223	V	231	1
1355	KCNJ14	V255M	Gnomad only	NA	NA	NA	250	I	258	0
1356	KCNJ14	V269L	Gnomad only	NA	NA	NA	264	V	272	1
1357	KCNJ14	V269M	Gnomad only	NA	NA	NA	264	V	272	1
1358	KCNJ14	V275I	Gnomad only	NA	NA	NA	270	V	278	1
1359	KCNJ14	V307A	Gnomad only	NA	NA	NA	302	V	310	1
1360	KCNJ14	V334A	Gnomad only	NA	NA	NA	329	V	337	1
1361	KCNJ14	V334I	Gnomad only	NA	NA	NA	329	V	337	1
1362	KCNJ14	V355I	Gnomad only	NA	NA	NA	350	V	358	1
1363	KCNJ14	V41M	Gnomad only	NA	NA	NA	31	G	31	0
1364	KCNJ14	V45M	Gnomad only	NA	NA	NA	35	S	35	0
1365	KCNJ14	V53L	Gnomad only	NA	NA	NA	48	V	48	1
1366	KCNJ14	V64I	Gnomad only	NA	NA	NA	59	I	59	0
1367	KCNJ14	V84L	Gnomad only	NA	NA	NA	79	I	79	0
1368	KCNJ14	V84M	Gnomad only	NA	NA	NA	79	I	79	0
1369	KCNJ14	W101R	Gnomad only	NA	NA	NA	96	W	96	1
1370	KCNJ14	W109R	Gnomad only	NA	NA	NA	104	W	104	1
1371	KCNJ14	W217L	Gnomad only	NA	NA	NA	212	W	220	1
1372	KCNJ14	W88C	Gnomad only	NA	NA	NA	83	W	83	1
1373	KCNJ14	W88C	Gnomad only	NA	NA	NA	83	W	83	1
1374	KCNJ14	Y150H	Gnomad only	NA	NA	NA	145	Y	153	1
1375	KCNJ14	Y247C	Gnomad only	NA	NA	NA	242	Y	250	1
1376	KCNJ14	Y247H	Gnomad only	NA	NA	NA	242	Y	250	1
1377	KCNJ14	Y320C	Gnomad only	NA	NA	NA	315	Y	323	1
1378	KCNJ14	Y390D	Gnomad only	NA	NA	NA	376	Y	384	1
1379	KCNJ15	A117V	Gnomad only	NA	NA	NA	132	A	140	1
1380	KCNJ15	A148S	Gnomad only	NA	NA	NA	163	F	171	0
1381	KCNJ15	A148T	Gnomad only	NA	NA	NA	163	F	171	0
1382	KCNJ15	A148V	Gnomad only	NA	NA	NA	163	F	171	0
1383	KCNJ15	A184T	Gnomad only	NA	NA	NA	199	A	207	1
1384	KCNJ15	A233T	Gnomad only	NA	NA	NA	248	I	256	0
1385	KCNJ15	A24G	Gnomad only	NA	NA	NA	42	Q	42	0
1386	KCNJ15	A285T	Gnomad only	NA	NA	NA	300	G	308	0
1387	KCNJ15	A292T	Gnomad only	NA	NA	NA	307	M	315	0
1388	KCNJ15	A344S	Gnomad only	NA	NA	NA	376	Y	384	0
1389	KCNJ15	A344V	Gnomad only	NA	NA	NA	376	Y	384	0
1390	KCNJ15	A3T	Gnomad only	NA	NA	NA	11	I	11	0
1391	KCNJ15	A71T	Gnomad only	NA	NA	NA	89	C	89	0
1392	KCNJ15	A72S	Gnomad only	NA	NA	NA	90	L	90	0
1393	KCNJ15	A87T	Gnomad only	NA	NA	NA	105	L	105	0
1394	KCNJ15	A87V	Gnomad only	NA	NA	NA	105	L	105	0
1395	KCNJ15	A89T	Gnomad only	NA	NA	NA	107	A	107	1
1396	KCNJ15	A89V	Gnomad only	NA	NA	NA	107	A	107	1
1397	KCNJ15	C339F	Gnomad only	NA	NA	NA	356	C	364	1
1398	KCNJ15	C343R	Gnomad only	NA	NA	NA	375	C	383	1
1399	KCNJ15	C343S	Gnomad only	NA	NA	NA	375	C	383	1
1400	KCNJ15	C343W	Gnomad only	NA	NA	NA	375	C	383	1
1401	KCNJ15	C343Y	Gnomad only	NA	NA	NA	375	C	383	1
1402	KCNJ15	D112Y	Gnomad only	NA	NA	NA	127	N	135	0
1403	KCNJ15	D240E	Gnomad only	NA	NA	NA	255	D	263	1
1404	KCNJ15	D2Y	Gnomad only	NA	NA	NA	10	S	10	0
1405	KCNJ15	D345Y	Gnomad only	NA	NA	NA	377	E	385	0
1406	KCNJ15	D41A	Gnomad only	NA	NA	NA	59	I	59	0
1407	KCNJ15	D41G	Gnomad only	NA	NA	NA	59	I	59	0
1408	KCNJ15	D94N	Gnomad only	NA	NA	NA	112	D	112	1
1409	KCNJ15	E138D	Gnomad only	NA	NA	NA	153	E	161	1
1410	KCNJ15	E157D	Gnomad only	NA	NA	NA	172	D	180	0
1411	KCNJ15	E176A	Gnomad only	NA	NA	NA	191	E	199	1
1412	KCNJ15	E260K	Gnomad only	NA	NA	NA	275	E	283	1
1413	KCNJ15	E274G	Gnomad only	NA	NA	NA	289	N	297	0
1414	KCNJ15	E274K	Gnomad only	NA	NA	NA	289	N	297	0
1415	KCNJ15	E331K	Gnomad only	NA	NA	NA	345	H	353	0
1416	KCNJ15	E352K	Gnomad only	NA	NA	NA	384	S	392	0
1417	KCNJ15	E362G	Gnomad only	NA	NA	NA	408	L	416	0
1418	KCNJ15	E99D	Gnomad only	NA	NA	NA	117	K	125	0
1419	KCNJ15	F237L	Gnomad only	NA	NA	NA	252	V	260	0
1420	KCNJ15	F254L	Gnomad only	NA	NA	NA	269	I	277	0
1421	KCNJ15	F277C	Gnomad only	NA	NA	NA	292	F	300	1
1422	KCNJ15	F90Y	Gnomad only	NA	NA	NA	108	L	108	0
1423	KCNJ15	G129A	Gnomad only	NA	NA	NA	144	G	152	1
1424	KCNJ15	G129D	Gnomad only	NA	NA	NA	144	G	152	1
1425	KCNJ15	G131E	Gnomad only	NA	NA	NA	146	G	154	1
1426	KCNJ15	G162R	Gnomad only	NA	NA	NA	177	G	185	1
1427	KCNJ15	G191R	Gnomad only	NA	NA	NA	206	G	214	1
1428	KCNJ15	G21V	Gnomad only	NA	NA	NA	29	G	29	1
1429	KCNJ15	G21W	Gnomad only	NA	NA	NA	29	G	29	1
1430	KCNJ15	G308A	Gnomad only	NA	NA	NA	323	G	331	1
1431	KCNJ15	G308R	Gnomad only	NA	NA	NA	323	G	331	1
1432	KCNJ15	G7R	Gnomad only	NA	NA	NA	15	E	15	0
1433	KCNJ15	G7S	Gnomad only	NA	NA	NA	15	E	15	0
1434	KCNJ15	G98C	Gnomad only	NA	NA	NA	116	S	124	0
1435	KCNJ15	G98D	Gnomad only	NA	NA	NA	116	S	124	0
1436	KCNJ15	G98S	Gnomad only	NA	NA	NA	116	S	124	0
1437	KCNJ15	H104R	Gnomad only	NA	NA	NA	NA	-	NA	0
1438	KCNJ15	H141R	Gnomad only	NA	NA	NA	156	I	164	0
1439	KCNJ15	H141Y	Gnomad only	NA	NA	NA	156	I	164	0
1440	KCNJ15	H220Q	Gnomad only	NA	NA	NA	235	R	243	0
1441	KCNJ15	I143V	Gnomad only	NA	NA	NA	158	V	166	0
1442	KCNJ15	I160T	Gnomad only	NA	NA	NA	175	I	183	1
1443	KCNJ15	I197M	Gnomad only	NA	NA	NA	212	W	220	0
1444	KCNJ15	I305L	Gnomad only	NA	NA	NA	320	I	328	1
1445	KCNJ15	I305N	Gnomad only	NA	NA	NA	320	I	328	1
1446	KCNJ15	I305V	Gnomad only	NA	NA	NA	320	I	328	1
1447	KCNJ15	I46L	Gnomad only	NA	NA	NA	64	K	64	0
1448	KCNJ15	I4F	Gnomad only	NA	NA	NA	12	V	12	0
1449	KCNJ15	I59M	Gnomad only	NA	NA	NA	77	V	77	0
1450	KCNJ15	I59T	Gnomad only	NA	NA	NA	77	V	77	0
1451	KCNJ15	I59V	Gnomad only	NA	NA	NA	77	V	77	0
1452	KCNJ15	I6V	Clinvar & Gnomad	Benign	770817	not provided	14	S	14	0
1453	KCNJ15	I84T	Gnomad only	NA	NA	NA	102	V	102	0
1454	KCNJ15	I84V	Gnomad only	NA	NA	NA	102	V	102	0
1455	KCNJ15	I88T	Gnomad only	NA	NA	NA	106	I	106	1
1456	KCNJ15	K179E	Gnomad only	NA	NA	NA	194	V	202	0
1457	KCNJ15	K179M	Gnomad only	NA	NA	NA	194	V	202	0
1458	KCNJ15	K223R	Gnomad only	NA	NA	NA	238	S	246	0
1459	KCNJ15	K23R	Gnomad only	NA	NA	NA	41	Q	41	0
1460	KCNJ15	K354R	Gnomad only	NA	NA	NA	386	E	394	0
1461	KCNJ15	L114F	Gnomad only	NA	NA	NA	129	F	137	0
1462	KCNJ15	L13P	Gnomad only	NA	NA	NA	21	L	21	1
1463	KCNJ15	L165R	Gnomad only	NA	NA	NA	180	M	188	0
1464	KCNJ15	L195S	Gnomad only	NA	NA	NA	210	L	218	1
1465	KCNJ15	L206F	Gnomad only	NA	NA	NA	221	H	229	0
1466	KCNJ15	L207V	Gnomad only	NA	NA	NA	222	L	230	1
1467	KCNJ15	L248F	Gnomad only	NA	NA	NA	263	L	271	1
1468	KCNJ15	L264M	Gnomad only	NA	NA	NA	279	L	287	1
1469	KCNJ15	L267V	Gnomad only	NA	NA	NA	282	L	290	1
1470	KCNJ15	L272I	Gnomad only	NA	NA	NA	287	I	295	0
1471	KCNJ15	L279F	Gnomad only	NA	NA	NA	294	I	302	0
1472	KCNJ15	L317V	Gnomad only	NA	NA	NA	332	E	340	0
1473	KCNJ15	L368I	Gnomad only	NA	NA	NA	414	V	422	0
1474	KCNJ15	L369I	Gnomad only	NA	NA	NA	415	P	423	0
1475	KCNJ15	L369S	Gnomad only	NA	NA	NA	415	P	423	0
1476	KCNJ15	L48P	Gnomad only	NA	NA	NA	66	Q	66	0
1477	KCNJ15	L54R	Gnomad only	NA	NA	NA	72	I	72	0
1478	KCNJ15	L95S	Gnomad only	NA	NA	NA	113	L	113	1
1479	KCNJ15	M109I	Gnomad only	NA	NA	NA	124	S	132	0
1480	KCNJ15	M109V	Gnomad only	NA	NA	NA	124	S	132	0
1481	KCNJ15	M202T	Gnomad only	NA	NA	NA	217	L	225	0
1482	KCNJ15	M30L	Gnomad only	NA	NA	NA	48	V	48	0
1483	KCNJ15	M30T	Gnomad only	NA	NA	NA	48	V	48	0
1484	KCNJ15	M61L	Gnomad only	NA	NA	NA	79	I	79	0
1485	KCNJ15	M61V	Gnomad only	NA	NA	NA	79	I	79	0
1486	KCNJ15	N103S	Gnomad only	NA	NA	NA	NA	-	NA	0
1487	KCNJ15	N201D	Gnomad only	NA	NA	NA	216	N	224	1
1488	KCNJ15	N231S	Gnomad only	NA	NA	NA	246	D	254	0
1489	KCNJ15	N25Y	Gnomad only	NA	NA	NA	43	C	43	0
1490	KCNJ15	N320D	Gnomad only	NA	NA	NA	334	K	342	0
1491	KCNJ15	P106L	Gnomad only	NA	NA	NA	121	A	129	0
1492	KCNJ15	P140S	Gnomad only	NA	NA	NA	155	P	163	1
1493	KCNJ15	P269T	Gnomad only	NA	NA	NA	284	K	292	0
1494	KCNJ15	P27L	Gnomad only	NA	NA	NA	45	S	45	0
1495	KCNJ15	P313S	Gnomad only	NA	NA	NA	328	P	336	1
1496	KCNJ15	P337A	Gnomad only	NA	NA	NA	354	P	362	1
1497	KCNJ15	P337Q	Gnomad only	NA	NA	NA	354	P	362	1
1498	KCNJ15	Q349E	Gnomad only	NA	NA	NA	381	A	389	0
1499	KCNJ15	Q350H	Gnomad only	NA	NA	NA	382	L	390	0
1500	KCNJ15	Q52E	Gnomad only	NA	NA	NA	70	A	70	0
1501	KCNJ15	R133C	Gnomad only	NA	NA	NA	148	R	156	1
1502	KCNJ15	R133H	Gnomad only	NA	NA	NA	148	R	156	1
1503	KCNJ15	R174Q	Gnomad only	NA	NA	NA	189	R	197	1
1504	KCNJ15	R174W	Gnomad only	NA	NA	NA	189	R	197	1
1505	KCNJ15	R227Q	Gnomad only	NA	NA	NA	242	Y	250	0
1506	KCNJ15	R227W	Gnomad only	NA	NA	NA	242	Y	250	0
1507	KCNJ15	R26G	Gnomad only	NA	NA	NA	44	R	44	1
1508	KCNJ15	R28C	Gnomad only	NA	NA	NA	46	R	46	1
1509	KCNJ15	R28H	Gnomad only	NA	NA	NA	46	R	46	1
1510	KCNJ15	R297Q	Gnomad only	NA	NA	NA	312	R	320	1
1511	KCNJ15	R334Q	Gnomad only	NA	NA	NA	348	Y	356	0
1512	KCNJ15	R334W	Gnomad only	NA	NA	NA	348	Y	356	0
1513	KCNJ15	R356W	Gnomad only	NA	NA	NA	388	D	396	0
1514	KCNJ15	R366K	Gnomad only	NA	NA	NA	412	A	420	0
1515	KCNJ15	R39K	Gnomad only	NA	NA	NA	57	Q	57	0
1516	KCNJ15	S10R	Gnomad only	NA	NA	NA	18	G	18	0
1517	KCNJ15	S113F	Gnomad only	NA	NA	NA	128	S	136	1
1518	KCNJ15	S113P	Gnomad only	NA	NA	NA	128	S	136	1
1519	KCNJ15	S181N	Gnomad only	NA	NA	NA	196	S	204	1
1520	KCNJ15	S181R	Gnomad only	NA	NA	NA	196	S	204	1
1521	KCNJ15	S241F	Gnomad only	NA	NA	NA	256	S	264	1
1522	KCNJ15	S242F	Gnomad only	NA	NA	NA	257	G	265	0
1523	KCNJ15	S245T	Gnomad only	NA	NA	NA	260	R	268	0
1524	KCNJ15	S289Y	Gnomad only	NA	NA	NA	304	A	312	0
1525	KCNJ15	S296R	Gnomad only	NA	NA	NA	311	C	319	0
1526	KCNJ15	S328R	Gnomad only	NA	NA	NA	342	S	350	1
1527	KCNJ15	S346C	Gnomad only	NA	NA	NA	378	N	386	0
1528	KCNJ15	S36G	Gnomad only	NA	NA	NA	54	C	54	0
1529	KCNJ15	T105N	Gnomad only	NA	NA	NA	NA	-	NA	0
1530	KCNJ15	T11N	Gnomad only	NA	NA	NA	19	M	19	0
1531	KCNJ15	T11P	Gnomad only	NA	NA	NA	19	M	19	0
1532	KCNJ15	T153M	Gnomad only	NA	NA	NA	168	G	176	0
1533	KCNJ15	T163N	Gnomad only	NA	NA	NA	178	A	186	0
1534	KCNJ15	T177A	Gnomad only	NA	NA	NA	192	T	200	1
1535	KCNJ15	T17A	Gnomad only	NA	NA	NA	25	A	25	0
1536	KCNJ15	T222S	Gnomad only	NA	NA	NA	237	T	245	1
1537	KCNJ15	T261M	Gnomad only	NA	NA	NA	276	D	284	0
1538	KCNJ15	T56N	Gnomad only	NA	NA	NA	74	T	74	1
1539	KCNJ15	T68A	Gnomad only	NA	NA	NA	86	V	86	0
1540	KCNJ15	V151F	Gnomad only	NA	NA	NA	166	I	174	0
1541	KCNJ15	V151L	Gnomad only	NA	NA	NA	166	I	174	0
1542	KCNJ15	V196M	Gnomad only	NA	NA	NA	211	M	219	0
1543	KCNJ15	V221I	Gnomad only	NA	NA	NA	236	I	244	0
1544	KCNJ15	V221L	Gnomad only	NA	NA	NA	236	I	244	0
1545	KCNJ15	V257L	Gnomad only	NA	NA	NA	272	E	280	0
1546	KCNJ15	V257M	Gnomad only	NA	NA	NA	272	E	280	0
1547	KCNJ15	V281I	Gnomad only	NA	NA	NA	296	V	304	1
1548	KCNJ15	V287M	Gnomad only	NA	NA	NA	302	V	310	1
1549	KCNJ15	V293I	Gnomad only	NA	NA	NA	308	T	316	0
1550	KCNJ15	V293L	Gnomad only	NA	NA	NA	308	T	316	0
1551	KCNJ15	V29I	Gnomad only	NA	NA	NA	47	F	47	0
1552	KCNJ15	V312L	Gnomad only	NA	NA	NA	327	E	335	0
1553	KCNJ15	V324M	Gnomad only	NA	NA	NA	338	K	346	0
1554	KCNJ15	V38M	Gnomad only	NA	NA	NA	56	V	56	1
1555	KCNJ15	V75L	Gnomad only	NA	NA	NA	93	V	93	1
1556	KCNJ15	V75M	Gnomad only	NA	NA	NA	93	V	93	1
1557	KCNJ15	W55S	Gnomad only	NA	NA	NA	73	F	73	0
1558	KCNJ15	W78G	Gnomad only	NA	NA	NA	96	W	96	1
1559	KCNJ15	Y130C	Gnomad only	NA	NA	NA	145	Y	153	1
1560	KCNJ15	Y306C	Gnomad only	NA	NA	NA	321	L	329	0
1561	KCNJ15	Y323H	Gnomad only	NA	NA	NA	337	Y	345	1
1562	KCNJ15	Y86C	Gnomad only	NA	NA	NA	104	W	104	0
1563	KCNJ16	A13V	Gnomad only	NA	NA	NA	14	S	14	0
1564	KCNJ16	A15T	Gnomad only	NA	NA	NA	16	E	16	0
1565	KCNJ16	A179V	Gnomad only	NA	NA	NA	190	N	198	0
1566	KCNJ16	A218G	Gnomad only	NA	NA	NA	229	A	237	1
1567	KCNJ16	A27V	Gnomad only	NA	NA	NA	28	N	28	0
1568	KCNJ16	A341S	Gnomad only	NA	NA	NA	358	A	366	1
1569	KCNJ16	A356G	Gnomad only	NA	NA	NA	NA	-	NA	0
1570	KCNJ16	A356V	Gnomad only	NA	NA	NA	NA	-	NA	0
1571	KCNJ16	A369V	Gnomad only	NA	NA	NA	381	A	389	1
1572	KCNJ16	A376S	Gnomad only	NA	NA	NA	NA	-	NA	0
1573	KCNJ16	A376V	Gnomad only	NA	NA	NA	NA	-	NA	0
1574	KCNJ16	A378V	Gnomad only	NA	NA	NA	NA	-	NA	0
1575	KCNJ16	A393T	Gnomad only	NA	NA	NA	402	T	410	0
1576	KCNJ16	A96V	Gnomad only	NA	NA	NA	107	A	107	1
1577	KCNJ16	C138G	Gnomad only	NA	NA	NA	149	C	157	1
1578	KCNJ16	C138W	Gnomad only	NA	NA	NA	149	C	157	1
1579	KCNJ16	C143R	Gnomad only	NA	NA	NA	154	C	162	1
1580	KCNJ16	C143Y	Gnomad only	NA	NA	NA	154	C	162	1
1581	KCNJ16	C198R	Gnomad only	NA	NA	NA	209	C	217	1
1582	KCNJ16	C198Y	Gnomad only	NA	NA	NA	209	C	217	1
1583	KCNJ16	C339F	Gnomad only	NA	NA	NA	356	C	364	1
1584	KCNJ16	C339G	Gnomad only	NA	NA	NA	356	C	364	1
1585	KCNJ16	C43R	Gnomad only	NA	NA	NA	54	C	54	1
1586	KCNJ16	C43Y	Gnomad only	NA	NA	NA	54	C	54	1
1587	KCNJ16	C6F	Gnomad only	NA	NA	NA	7	N	7	0
1588	KCNJ16	D101N	Gnomad only	NA	NA	NA	112	D	112	1
1589	KCNJ16	D113V	Gnomad only	NA	NA	NA	124	S	132	0
1590	KCNJ16	D237E	Gnomad only	NA	NA	NA	249	D	257	1
1591	KCNJ16	D243E	Gnomad only	NA	NA	NA	259	D	267	1
1592	KCNJ16	D243E	Gnomad only	NA	NA	NA	259	D	267	1
1593	KCNJ16	D243N	Gnomad only	NA	NA	NA	259	D	267	1
1594	KCNJ16	D267G	Gnomad only	NA	NA	NA	283	S	291	0
1595	KCNJ16	D267Y	Gnomad only	NA	NA	NA	283	S	291	0
1596	KCNJ16	D348G	Gnomad only	NA	NA	NA	365	K	373	0
1597	KCNJ16	D366N	Gnomad only	NA	NA	NA	378	N	386	0
1598	KCNJ16	D40V	Gnomad only	NA	NA	NA	51	D	51	1
1599	KCNJ16	D40Y	Gnomad only	NA	NA	NA	51	D	51	1
1600	KCNJ16	D60E	Gnomad only	NA	NA	NA	71	D	71	1
1601	KCNJ16	E127D	Gnomad only	NA	NA	NA	138	E	146	1
1602	KCNJ16	E127K	Gnomad only	NA	NA	NA	138	E	146	1
1603	KCNJ16	E142D	Gnomad only	NA	NA	NA	153	E	161	1
1604	KCNJ16	E19V	Gnomad only	NA	NA	NA	20	K	20	0
1605	KCNJ16	E225V	Gnomad only	NA	NA	NA	236	I	244	0
1606	KCNJ16	E228D	Gnomad only	NA	NA	NA	239	E	247	1
1607	KCNJ16	E23A	Gnomad only	NA	NA	NA	24	M	24	0
1608	KCNJ16	E23G	Gnomad only	NA	NA	NA	24	M	24	0
1609	KCNJ16	E256D	Gnomad only	NA	NA	NA	272	E	280	1
1610	KCNJ16	E315D	Gnomad only	NA	NA	NA	331	F	339	0
1611	KCNJ16	E354A	Gnomad only	NA	NA	NA	NA	-	NA	0
1612	KCNJ16	E388A	Gnomad only	NA	NA	NA	390	S	398	0
1613	KCNJ16	F118V	Gnomad only	NA	NA	NA	129	F	137	1
1614	KCNJ16	F163C	Gnomad only	NA	NA	NA	174	F	182	1
1615	KCNJ16	F184C	Gnomad only	NA	NA	NA	195	F	203	1
1616	KCNJ16	F235L	Gnomad only	NA	NA	NA	247	Q	255	0
1617	KCNJ16	F276L	Gnomad only	NA	NA	NA	292	F	300	1
1618	KCNJ16	F276V	Gnomad only	NA	NA	NA	292	F	300	1
1619	KCNJ16	F282L	Gnomad only	NA	NA	NA	298	L	306	0
1620	KCNJ16	F282L	Gnomad only	NA	NA	NA	298	L	306	0
1621	KCNJ16	F328C	Gnomad only	NA	NA	NA	344	F	352	1
1622	KCNJ16	F47L	Gnomad only	NA	NA	NA	58	F	58	1
1623	KCNJ16	F74S	Gnomad only	NA	NA	NA	85	L	85	0
1624	KCNJ16	F88V	Gnomad only	NA	NA	NA	99	F	99	1
1625	KCNJ16	F97C	Gnomad only	NA	NA	NA	108	L	108	0
1626	KCNJ16	F97L	Gnomad only	NA	NA	NA	108	L	108	0
1627	KCNJ16	G120A	Gnomad only	NA	NA	NA	131	A	139	0
1628	KCNJ16	G120E	Gnomad only	NA	NA	NA	131	A	139	0
1629	KCNJ16	G135A	Clinvar only	Pathogenic	NA	HYPOKALEMIC TUBULOPATHY AND DEAFNESS	146	G	154	1
1630	KCNJ16	G166A	Gnomad only	NA	NA	NA	177	G	185	1
1631	KCNJ16	G191D	Gnomad only	NA	NA	NA	202	A	210	0
1632	KCNJ16	G195E	Gnomad only	NA	NA	NA	206	G	214	1
1633	KCNJ16	G204C	Gnomad only	NA	NA	NA	215	G	223	1
1634	KCNJ16	G214E	Gnomad only	NA	NA	NA	225	A	233	0
1635	KCNJ16	G307C	Gnomad only	NA	NA	NA	323	G	331	1
1636	KCNJ16	G330E	Gnomad only	NA	NA	NA	346	K	354	0
1637	KCNJ16	G55E	Gnomad only	NA	NA	NA	66	Q	66	0
1638	KCNJ16	G5S	Gnomad only	NA	NA	NA	6	T	6	0
1639	KCNJ16	H210D	Gnomad only	NA	NA	NA	221	H	229	1
1640	KCNJ16	H210R	Gnomad only	NA	NA	NA	221	H	229	1
1641	KCNJ16	H24R	Gnomad only	NA	NA	NA	25	A	25	0
1642	KCNJ16	H255D	Gnomad only	NA	NA	NA	271	H	279	1
1643	KCNJ16	H255R	Gnomad only	NA	NA	NA	271	H	279	1
1644	KCNJ16	H255Y	Gnomad only	NA	NA	NA	271	H	279	1
1645	KCNJ16	H259L	Gnomad only	NA	NA	NA	275	E	283	0
1646	KCNJ16	H395R	Gnomad only	NA	NA	NA	404	P	412	0
1647	KCNJ16	H49Y	Gnomad only	NA	NA	NA	60	N	60	0
1648	KCNJ16	H99R	Gnomad only	NA	NA	NA	110	H	110	1
1649	KCNJ16	H9R	Gnomad only	NA	NA	NA	10	S	10	0
1650	KCNJ16	I10V	Gnomad only	NA	NA	NA	11	I	11	1
1651	KCNJ16	I11V	Clinvar & Gnomad	Benign	1266075	not provided	12	V	12	0
1652	KCNJ16	I132R	Clinvar & Gnomad	Pathogenic	1174518	HYPOKALEMIC TUBULOPATHY AND DEAFNESS	143	I	151	1
1653	KCNJ16	I132V	Gnomad only	NA	NA	NA	143	I	151	1
1654	KCNJ16	I14R	Gnomad only	NA	NA	NA	15	E	15	0
1655	KCNJ16	I14T	Gnomad only	NA	NA	NA	15	E	15	0
1656	KCNJ16	I155F	Gnomad only	NA	NA	NA	166	I	174	1
1657	KCNJ16	I155T	Gnomad only	NA	NA	NA	166	I	174	1
1658	KCNJ16	I164L	Gnomad only	NA	NA	NA	175	I	183	1
1659	KCNJ16	I165T	Gnomad only	NA	NA	NA	176	I	184	1
1660	KCNJ16	I190T	Gnomad only	NA	NA	NA	201	I	209	1
1661	KCNJ16	I203T	Gnomad only	NA	NA	NA	214	V	222	0
1662	KCNJ16	I253T	Gnomad only	NA	NA	NA	269	I	277	1
1663	KCNJ16	I25T	Gnomad only	NA	NA	NA	26	V	26	0
1664	KCNJ16	I25V	Gnomad only	NA	NA	NA	26	V	26	0
1665	KCNJ16	I26M	Gnomad only	NA	NA	NA	27	A	27	0
1666	KCNJ16	I26T	Gnomad only	NA	NA	NA	27	A	27	0
1667	KCNJ16	I26V	Gnomad only	NA	NA	NA	27	A	27	0
1668	KCNJ16	I283F	Gnomad only	NA	NA	NA	299	E	307	0
1669	KCNJ16	I283V	Gnomad only	NA	NA	NA	299	E	307	0
1670	KCNJ16	I353T	Gnomad only	NA	NA	NA	NA	-	NA	0
1671	KCNJ16	I412V	Gnomad only	NA	NA	NA	421	L	429	0
1672	KCNJ16	I61N	Gnomad only	NA	NA	NA	72	I	72	1
1673	KCNJ16	I82V	Gnomad only	NA	NA	NA	93	V	93	0
1674	KCNJ16	I87K	Gnomad only	NA	NA	NA	98	F	98	0
1675	KCNJ16	I95V	Gnomad only	NA	NA	NA	106	I	106	1
1676	KCNJ16	K171E	Gnomad only	NA	NA	NA	182	K	190	1
1677	KCNJ16	K196R	Gnomad only	NA	NA	NA	207	K	215	1
1678	KCNJ16	K239R	Gnomad only	NA	NA	NA	251	N	259	0
1679	KCNJ16	K269R	Gnomad only	NA	NA	NA	285	Q	293	0
1680	KCNJ16	K29E	Gnomad only	NA	NA	NA	30	F	30	0
1681	KCNJ16	K29R	Gnomad only	NA	NA	NA	30	F	30	0
1682	KCNJ16	K322Q	Gnomad only	NA	NA	NA	338	K	346	1
1683	KCNJ16	K355N	Gnomad only	NA	NA	NA	NA	-	NA	0
1684	KCNJ16	K355N	Gnomad only	NA	NA	NA	NA	-	NA	0
1685	KCNJ16	K355R	Gnomad only	NA	NA	NA	NA	-	NA	0
1686	KCNJ16	K404Q	Gnomad only	NA	NA	NA	413	S	421	0
1687	KCNJ16	L148H	Gnomad only	NA	NA	NA	159	F	167	0
1688	KCNJ16	L152P	Gnomad only	NA	NA	NA	163	F	171	0
1689	KCNJ16	L21F	Gnomad only	NA	NA	NA	22	A	22	0
1690	KCNJ16	L21S	Gnomad only	NA	NA	NA	22	A	22	0
1691	KCNJ16	L220F	Gnomad only	NA	NA	NA	231	L	239	1
1692	KCNJ16	L238P	Gnomad only	NA	NA	NA	250	I	258	0
1693	KCNJ16	L23P	Gnomad only	NA	NA	NA	24	M	24	0
1694	KCNJ16	L23V	Gnomad only	NA	NA	NA	24	M	24	0
1695	KCNJ16	L247V	Gnomad only	NA	NA	NA	263	L	271	1
1696	KCNJ16	L266F	Gnomad only	NA	NA	NA	282	L	290	1
1697	KCNJ16	L2P	Gnomad only	NA	NA	NA	3	S	3	0
1698	KCNJ16	L314M	Gnomad only	NA	NA	NA	330	L	338	1
1699	KCNJ16	L351V	Gnomad only	NA	NA	NA	368	L	376	1
1700	KCNJ16	L36F	Gnomad only	NA	NA	NA	47	F	47	0
1701	KCNJ16	L406F	Gnomad only	NA	NA	NA	415	P	423	0
1702	KCNJ16	L6V	Gnomad only	NA	NA	NA	7	N	7	0
1703	KCNJ16	L94V	Gnomad only	NA	NA	NA	105	L	105	1
1704	KCNJ16	M149V	Gnomad only	NA	NA	NA	160	M	168	1
1705	KCNJ16	M172R	Gnomad only	NA	NA	NA	183	M	191	1
1706	KCNJ16	M172V	Gnomad only	NA	NA	NA	183	M	191	1
1707	KCNJ16	M192K	Gnomad only	NA	NA	NA	203	M	211	1
1708	KCNJ16	M192V	Gnomad only	NA	NA	NA	203	M	211	1
1709	KCNJ16	M233V	Gnomad only	NA	NA	NA	245	L	253	0
1710	KCNJ16	M418I	Gnomad only	NA	NA	NA	427	I	435	0
1711	KCNJ16	M4T	Gnomad only	NA	NA	NA	5	R	5	0
1712	KCNJ16	M73I	Gnomad only	NA	NA	NA	84	M	84	1
1713	KCNJ16	M73L	Gnomad only	NA	NA	NA	84	M	84	1
1714	KCNJ16	M73V	Gnomad only	NA	NA	NA	84	M	84	1
1715	KCNJ16	N104H	Gnomad only	NA	NA	NA	115	A	115	0
1716	KCNJ16	N11K	Gnomad only	NA	NA	NA	12	V	12	0
1717	KCNJ16	N11Y	Gnomad only	NA	NA	NA	12	V	12	0
1718	KCNJ16	N12D	Gnomad only	NA	NA	NA	13	S	13	0
1719	KCNJ16	N12H	Gnomad only	NA	NA	NA	13	S	13	0
1720	KCNJ16	N12S	Gnomad only	NA	NA	NA	13	S	13	0
1721	KCNJ16	N275I	Gnomad only	NA	NA	NA	291	D	299	0
1722	KCNJ16	N275T	Gnomad only	NA	NA	NA	291	D	299	0
1723	KCNJ16	N311H	Gnomad only	NA	NA	NA	327	E	335	0
1724	KCNJ16	N385K	Gnomad only	NA	NA	NA	387	E	395	0
1725	KCNJ16	N410I	Gnomad only	NA	NA	NA	419	R	427	0
1726	KCNJ16	N44D	Gnomad only	NA	NA	NA	55	N	55	1
1727	KCNJ16	N44S	Gnomad only	NA	NA	NA	55	N	55	1
1728	KCNJ16	P106L	Gnomad only	NA	NA	NA	117	K	125	0
1729	KCNJ16	P106T	Gnomad only	NA	NA	NA	117	K	125	0
1730	KCNJ16	P110S	Gnomad only	NA	NA	NA	121	A	129	0
1731	KCNJ16	P21L	Gnomad only	NA	NA	NA	22	A	22	0
1732	KCNJ16	P250L	Clinvar & Gnomad	Pathogenic	1174519	HYPOKALEMIC TUBULOPATHY AND DEAFNESS	266	P	274	1
1733	KCNJ16	P262L	Gnomad only	NA	NA	NA	278	P	286	1
1734	KCNJ16	P337R	Gnomad only	NA	NA	NA	354	P	362	1
1735	KCNJ16	P357S	Gnomad only	NA	NA	NA	369	S	377	0
1736	KCNJ16	P386S	Gnomad only	NA	NA	NA	388	D	396	0
1737	KCNJ16	P401A	Gnomad only	NA	NA	NA	410	N	418	0
1738	KCNJ16	P401L	Gnomad only	NA	NA	NA	410	N	418	0
1739	KCNJ16	P401S	Gnomad only	NA	NA	NA	410	N	418	0
1740	KCNJ16	P401T	Gnomad only	NA	NA	NA	410	N	418	0
1741	KCNJ16	Q153K	Gnomad only	NA	NA	NA	164	Q	172	1
1742	KCNJ16	Q34E	Gnomad only	NA	NA	NA	45	S	45	0
1743	KCNJ16	R137C	Clinvar & Gnomad	Pathogenic	1174516	HYPOKALEMIC TUBULOPATHY AND DEAFNESS	148	R	156	1
1744	KCNJ16	R137H	Gnomad only	NA	NA	NA	148	R	156	1
1745	KCNJ16	R176G	Gnomad only	NA	NA	NA	187	K	195	0
1746	KCNJ16	R176Q	Gnomad only	NA	NA	NA	187	K	195	0
1747	KCNJ16	R183C	Gnomad only	NA	NA	NA	194	V	202	0
1748	KCNJ16	R183H	Gnomad only	NA	NA	NA	194	V	202	0
1749	KCNJ16	R183L	Gnomad only	NA	NA	NA	194	V	202	0
1750	KCNJ16	R202C	Gnomad only	NA	NA	NA	213	R	221	1
1751	KCNJ16	R202H	Gnomad only	NA	NA	NA	213	R	221	1
1752	KCNJ16	R202L	Gnomad only	NA	NA	NA	213	R	221	1
1753	KCNJ16	R202P	Gnomad only	NA	NA	NA	213	R	221	1
1754	KCNJ16	R207W	Gnomad only	NA	NA	NA	218	R	226	1
1755	KCNJ16	R222C	Gnomad only	NA	NA	NA	233	K	241	0
1756	KCNJ16	R222H	Gnomad only	NA	NA	NA	233	K	241	0
1757	KCNJ16	R230K	Gnomad only	NA	NA	NA	241	E	249	0
1758	KCNJ16	R268C	Gnomad only	NA	NA	NA	284	K	292	0
1759	KCNJ16	R268G	Gnomad only	NA	NA	NA	284	K	292	0
1760	KCNJ16	R268H	Gnomad only	NA	NA	NA	284	K	292	0
1761	KCNJ16	R268L	Gnomad only	NA	NA	NA	284	K	292	0
1762	KCNJ16	R302G	Gnomad only	NA	NA	NA	318	N	326	0
1763	KCNJ16	R302Q	Gnomad only	NA	NA	NA	318	N	326	0
1764	KCNJ16	R31K	Gnomad only	NA	NA	NA	42	Q	42	0
1765	KCNJ16	R31K	Gnomad only	NA	NA	NA	42	Q	42	0
1766	KCNJ16	R35Q	Gnomad only	NA	NA	NA	46	R	46	1
1767	KCNJ16	R360Q	Gnomad only	NA	NA	NA	372	N	380	0
1768	KCNJ16	R371Q	Gnomad only	NA	NA	NA	383	T	391	0
1769	KCNJ16	R71C	Gnomad only	NA	NA	NA	82	R	82	1
1770	KCNJ16	R71H	Gnomad only	NA	NA	NA	82	R	82	1
1771	KCNJ16	S261C	Gnomad only	NA	NA	NA	277	S	285	1
1772	KCNJ16	S261N	Gnomad only	NA	NA	NA	277	S	285	1
1773	KCNJ16	S26L	Gnomad only	NA	NA	NA	27	A	27	0
1774	KCNJ16	S288Y	Gnomad only	NA	NA	NA	304	A	312	0
1775	KCNJ16	S292C	Gnomad only	NA	NA	NA	308	T	316	0
1776	KCNJ16	S295P	Gnomad only	NA	NA	NA	311	C	319	0
1777	KCNJ16	S297C	Gnomad only	NA	NA	NA	313	S	321	1
1778	KCNJ16	S298C	Gnomad only	NA	NA	NA	314	S	322	1
1779	KCNJ16	S340I	Gnomad only	NA	NA	NA	357	S	365	1
1780	KCNJ16	S340N	Gnomad only	NA	NA	NA	357	S	365	1
1781	KCNJ16	S365L	Gnomad only	NA	NA	NA	377	E	385	0
1782	KCNJ16	S373P	Gnomad only	NA	NA	NA	NA	-	NA	0
1783	KCNJ16	S375N	Gnomad only	NA	NA	NA	NA	-	NA	0
1784	KCNJ16	S375R	Gnomad only	NA	NA	NA	NA	-	NA	0
1785	KCNJ16	S381N	Gnomad only	NA	NA	NA	NA	-	NA	0
1786	KCNJ16	S382T	Gnomad only	NA	NA	NA	384	S	392	1
1787	KCNJ16	S7R	Gnomad only	NA	NA	NA	8	R	8	0
1788	KCNJ16	S84L	Gnomad only	NA	NA	NA	95	S	95	1
1789	KCNJ16	T109A	Gnomad only	NA	NA	NA	120	K	128	0
1790	KCNJ16	T109I	Gnomad only	NA	NA	NA	120	K	128	0
1791	KCNJ16	T128S	Gnomad only	NA	NA	NA	139	T	147	1
1792	KCNJ16	T162I	Gnomad only	NA	NA	NA	173	A	181	0
1793	KCNJ16	T16A	Gnomad only	NA	NA	NA	17	D	17	0
1794	KCNJ16	T16R	Gnomad only	NA	NA	NA	17	D	17	0
1795	KCNJ16	T174A	Gnomad only	NA	NA	NA	185	K	193	0
1796	KCNJ16	T181A	Gnomad only	NA	NA	NA	192	T	200	1
1797	KCNJ16	T215I	Gnomad only	NA	NA	NA	226	H	234	0
1798	KCNJ16	T232M	Gnomad only	NA	NA	NA	244	P	252	0
1799	KCNJ16	T249I	Gnomad only	NA	NA	NA	265	S	273	0
1800	KCNJ16	T285A	Gnomad only	NA	NA	NA	301	M	309	0
1801	KCNJ16	T289I	Gnomad only	NA	NA	NA	305	T	313	1
1802	KCNJ16	T364M	Gnomad only	NA	NA	NA	376	Y	384	0
1803	KCNJ16	T63S	Gnomad only	NA	NA	NA	74	T	74	1
1804	KCNJ16	T64I	Clinvar & Gnomad	Pathogenic	1174521	HYPOKALEMIC TUBULOPATHY AND DEAFNESS	75	T	75	1
1805	KCNJ16	T68I	Gnomad only	NA	NA	NA	79	I	79	0
1806	KCNJ16	V115I	Gnomad only	NA	NA	NA	126	V	134	1
1807	KCNJ16	V147G	Gnomad only	NA	NA	NA	158	V	166	1
1808	KCNJ16	V147L	Gnomad only	NA	NA	NA	158	V	166	1
1809	KCNJ16	V147M	Gnomad only	NA	NA	NA	158	V	166	1
1810	KCNJ16	V150A	Gnomad only	NA	NA	NA	161	V	169	1
1811	KCNJ16	V211L	Gnomad only	NA	NA	NA	222	L	230	0
1812	KCNJ16	V211M	Gnomad only	NA	NA	NA	222	L	230	0
1813	KCNJ16	V212I	Gnomad only	NA	NA	NA	223	V	231	1
1814	KCNJ16	V241L	Gnomad only	NA	NA	NA	253	G	261	0
1815	KCNJ16	V248A	Gnomad only	NA	NA	NA	264	V	272	1
1816	KCNJ16	V251I	Gnomad only	NA	NA	NA	267	I	275	0
1817	KCNJ16	V313I	Gnomad only	NA	NA	NA	329	V	337	1
1818	KCNJ16	V316I	Gnomad only	NA	NA	NA	332	E	340	0
1819	KCNJ16	V334A	Gnomad only	NA	NA	NA	350	V	358	1
1820	KCNJ16	V359G	Gnomad only	NA	NA	NA	371	A	379	0
1821	KCNJ16	V359I	Gnomad only	NA	NA	NA	371	A	379	0
1822	KCNJ16	V377A	Gnomad only	NA	NA	NA	NA	-	NA	0
1823	KCNJ16	V380I	Gnomad only	NA	NA	NA	NA	-	NA	0
1824	KCNJ16	V414L	Gnomad only	NA	NA	NA	423	R	431	0
1825	KCNJ16	V5F	Gnomad only	NA	NA	NA	6	T	6	0
1826	KCNJ16	V5I	Gnomad only	NA	NA	NA	6	T	6	0
1827	KCNJ16	V66M	Gnomad only	NA	NA	NA	77	V	77	1
1828	KCNJ16	V75M	Gnomad only	NA	NA	NA	86	V	86	1
1829	KCNJ16	W201R	Gnomad only	NA	NA	NA	212	W	220	1
1830	KCNJ16	W201S	Gnomad only	NA	NA	NA	212	W	220	1
1831	KCNJ16	W54C	Gnomad only	NA	NA	NA	65	G	65	0
1832	KCNJ16	W85C	Gnomad only	NA	NA	NA	96	W	96	1
1833	KCNJ16	Y134C	Gnomad only	NA	NA	NA	145	Y	153	1
1834	KCNJ16	Y136C	Gnomad only	NA	NA	NA	147	F	155	0
1835	KCNJ16	Y20C	Gnomad only	NA	NA	NA	21	L	21	0
1836	KCNJ16	Y299C	Gnomad only	NA	NA	NA	315	Y	323	1
1837	KCNJ16	Y320C	Gnomad only	NA	NA	NA	336	Y	344	1
1838	KCNJ16	Y321C	Gnomad only	NA	NA	NA	337	Y	345	1
1839	KCNJ16	Y3D	Gnomad only	NA	NA	NA	4	V	4	0
1840	KCNJ16	Y81D	Gnomad only	NA	NA	NA	92	F	92	0
1841	KCNJ18	A200P	Clinvar only	Pathogenic	NA	Thyrotoxic periodic paralysis, susceptibility to, 1	199	A	207	1
1842	KCNJ18	K366R	Clinvar only	Pathogenic	NA	Thyrotoxic periodic paralysis, susceptibility to, 1|Thyrotoxic periodic paralysis 2	366	Y	374	0
1843	KCNJ18	R205H	Clinvar only	Pathogenic	NA	Thyrotoxic periodic paralysis 2	204	R	212	1
1844	KCNJ18	R219C	Clinvar only	Uncertain significance	NA	Thyrotoxic periodic paralysis 2	218	R	226	1
1845	KCNJ18	R43C	Clinvar only	Pathogenic	NA	Thyrotoxic periodic paralysis, susceptibility to, 1	44	R	44	1
1846	KCNJ18	T140M	Clinvar only	Pathogenic	NA	Thyrotoxic periodic paralysis, susceptibility to, 1	139	T	147	1
1847	KCNJ18	T354M	Clinvar only	Pathogenic	NA	Thyrotoxic periodic paralysis, susceptibility to, 1|Thyrotoxic periodic paralysis 2	354	P	362	0
1848	KCNJ18	V168M	Clinvar only	Pathogenic	NA	Thyrotoxic periodic paralysis, susceptibility to, 1	167	V	175	1
1974	KCNJ2	M1T	Clinvar only	Uncertain significance	NA	not provided	1	M	1	1
2092	KCNJ2	V4M	Gnomad only	NA	NA	NA	4	V	4	1
2025	KCNJ2	R5Q	Clinvar & Gnomad	Uncertain significance	1052929	Andersen Tawil syndrome|Short QT syndrome 3	5	R	5	1
2072	KCNJ2	T6I	Gnomad only	NA	NA	NA	6	T	6	1
2032	KCNJ2	R8C	Clinvar & Gnomad	Uncertain significance	890665	Short QT syndrome 3|Andersen Tawil syndrome|Short QT syndrome 3|Atrial fibrillation, familial, 9|Andersen Tawil syndrome	8	R	8	1
2033	KCNJ2	R8H	Clinvar & Gnomad	Uncertain significance	844830	Andersen Tawil syndrome|Short QT syndrome 3	8	R	8	1
2034	KCNJ2	S10N	Gnomad only	NA	NA	NA	10	S	10	1
1898	KCNJ2	E16D	Gnomad only	NA	NA	NA	16	E	16	1
1899	KCNJ2	E16G	Gnomad only	NA	NA	NA	16	E	16	1
1876	KCNJ2	D17G	Gnomad only	NA	NA	NA	17	D	17	1
1877	KCNJ2	D17H	Gnomad only	NA	NA	NA	17	D	17	1
1878	KCNJ2	D17N	Clinvar only	Uncertain significance	NA	Wolff-Parkinson-White pattern	17	D	17	1
1921	KCNJ2	G18S	Clinvar & Gnomad	Uncertain significance	536360	Andersen Tawil syndrome|Short QT syndrome 3	18	G	18	1
1984	KCNJ2	N28S	Clinvar only	Uncertain significance	NA	Brugada syndrome	28	N	28	1
1927	KCNJ2	G33R	Clinvar & Gnomad	Uncertain significance	1163708	not provided	33	G	33	1
1954	KCNJ2	K34N	Clinvar & Gnomad	Uncertain significance	NA	Andersen Tawil syndrome	34	K	34	1
1955	KCNJ2	K34R	Clinvar & Gnomad	Uncertain significance	661299	Andersen Tawil syndrome|Short QT syndrome 3	34	K	34	1
2042	KCNJ2	S35G	Gnomad only	NA	NA	NA	35	S	35	1
2043	KCNJ2	S35T	Gnomad only	NA	NA	NA	35	S	35	1
2066	KCNJ2	T39I	Gnomad only	NA	NA	NA	39	T	39	1
2017	KCNJ2	R40P	Clinvar only	Uncertain significance	NA	Short QT syndrome 3|Andersen Tawil syndrome	40	R	40	1
2018	KCNJ2	R40Q	Clinvar & Gnomad	Uncertain significance	324830	Atrial fibrillation, familial, 9|SUDDEN INFANT DEATH SYNDROME|Short QT syndrome 3|Andersen Tawil syndrome|not provided|Andersen Tawil syndrome|Short QT syndrome 3	40	R	40	1
1870	KCNJ2	C43R	Gnomad only	NA	NA	NA	43	C	43	1
1871	KCNJ2	C43Y	Clinvar & Gnomad	Uncertain significance	1054264	Andersen Tawil syndrome|Short QT syndrome 3	43	C	43	1
2024	KCNJ2	R46H	Gnomad only	NA	NA	NA	46	R	46	1
1928	KCNJ2	G52V	Clinvar only	Uncertain significance	NA	not specified	52	G	52	1
1930	KCNJ2	H53R	Clinvar only	Uncertain significance	NA	Short QT syndrome 3|Andersen Tawil syndrome	53	H	53	1
1872	KCNJ2	C54F	Clinvar only	Pathogenic	NA	Andersen Tawil syndrome|Familial periodic paralysis	54	C	54	1
2093	KCNJ2	V56I	Clinvar only	Uncertain significance	NA	not provided	56	V	56	1
1999	KCNJ2	Q57R	Gnomad only	NA	NA	NA	57	Q	57	1
2026	KCNJ2	R67Q	Clinvar only	Pathogenic	NA	Andersen Tawil syndrome|Short QT syndrome 3|not specified|not provided|Congenital long QT syndrome	67	R	67	1
2027	KCNJ2	R67W	Clinvar only	Pathogenic	NA	Short QT syndrome 3|Andersen Tawil syndrome|Atrial fibrillation, familial, 9|not specified|Congenital long QT syndrome|Short QT syndrome 3|Andersen Tawil syndrome|not provided|Andersen Tawil syndrome	67	R	67	1
2100	KCNJ2	Y68D	Clinvar only	Uncertain significance	NA	Congenital long QT syndrome	68	Y	68	1
1861	KCNJ2	A70S	Clinvar & Gnomad	Uncertain significance	403977	Short QT syndrome 3|Andersen Tawil syndrome|not provided	70	A	70	1
1862	KCNJ2	A70T	Clinvar & Gnomad	Uncertain significance	190807	not specified	70	A	70	1
1890	KCNJ2	D71H	Clinvar only	Conflicting interpretations of pathogenicity	NA	Andersen Tawil syndrome|Andersen Tawil syndrome|Short QT syndrome 3	71	D	71	1
1891	KCNJ2	D71N	Clinvar only	Pathogenic	NA	not provided|Congenital long QT syndrome	71	D	71	1
1892	KCNJ2	D71V	Clinvar only	Pathogenic	NA	Andersen Tawil syndrome|Congenital long QT syndrome	71	D	71	1
1949	KCNJ2	I72M	Gnomad only	NA	NA	NA	72	I	72	1
2073	KCNJ2	T74A	Clinvar only	Uncertain significance	NA	Congenital long QT syndrome	74	T	74	1
2074	KCNJ2	T75A	Clinvar only	Uncertain significance	NA	Congenital long QT syndrome	75	T	75	1
2075	KCNJ2	T75M	Clinvar only	Pathogenic	NA	not provided|Andersen Tawil syndrome|Short QT syndrome 3|Congenital long QT syndrome	75	T	75	1
2076	KCNJ2	T75R	Clinvar only	Pathogenic	NA	Andersen Tawil syndrome|Congenital long QT syndrome	75	T	75	1
1873	KCNJ2	C76G	Clinvar only	Conflicting interpretations of pathogenicity	NA	Andersen Tawil syndrome|Short QT syndrome 3|not provided	76	C	76	1
1893	KCNJ2	D78G	Clinvar only	Pathogenic	NA	Andersen Tawil syndrome|Congenital long QT syndrome	78	D	78	1
1894	KCNJ2	D78H	Clinvar only	Uncertain significance	NA	Short QT syndrome 3|Andersen Tawil syndrome	78	D	78	1
1895	KCNJ2	D78Y	Clinvar only	Pathogenic	NA	Andersen Tawil syndrome|Short QT syndrome 3|Congenital long QT syndrome	78	D	78	1
1950	KCNJ2	I79T	Clinvar only	Conflicting interpretations of pathogenicity	NA	not provided	79	I	79	1
2028	KCNJ2	R80C	Clinvar only	Uncertain significance	NA	Andersen Tawil syndrome|Short QT syndrome 3	80	R	80	1
2029	KCNJ2	R80H	Clinvar only	Uncertain significance	NA	Short QT syndrome 3|Andersen Tawil syndrome	80	R	80	1
2030	KCNJ2	R82Q	Clinvar only	Pathogenic	NA	not provided|Andersen Tawil syndrome|Short QT syndrome 3|Andersen Tawil syndrome|Cardiovascular phenotype|Congenital long QT syndrome	82	R	82	1
2031	KCNJ2	R82W	Clinvar only	Pathogenic	NA	Ventricular tachycardia|not provided|Supraventricular tachycardia|Andersen Tawil syndrome|Short QT syndrome 3|Andersen Tawil syndrome	82	R	82	1
2094	KCNJ2	V86F	Clinvar only	Uncertain significance	NA	not provided	86	V	86	1
1951	KCNJ2	I87V	Clinvar & Gnomad	Uncertain significance	656328	Andersen Tawil syndrome|Short QT syndrome 3	87	I	87	1
1863	KCNJ2	A91V	Gnomad only	NA	NA	NA	91	A	91	1
2095	KCNJ2	V93I	Clinvar & Gnomad	Conflicting interpretations of pathogenicity	30121	Atrial fibrillation|Short QT syndrome 3|Andersen Tawil syndrome|not provided|Atrial fibrillation, familial, 9|Andersen Tawil syndrome|Short QT syndrome 3	93	V	93	1
1910	KCNJ2	F98I	Gnomad only	NA	NA	NA	98	F	98	1
1911	KCNJ2	F98V	Gnomad only	NA	NA	NA	98	F	98	1
1912	KCNJ2	G100V	Clinvar only	Uncertain significance	NA	Andersen Tawil syndrome|Short QT syndrome 3	100	G	100	1
1864	KCNJ2	C101F	Clinvar & Gnomad	Uncertain significance	449152	not provided	101	C	101	1
1865	KCNJ2	C101R	Clinvar only	Uncertain significance	NA	Ventricular tachycardia	101	C	101	1
2077	KCNJ2	V102M	Gnomad only	NA	NA	NA	102	V	102	1
1959	KCNJ2	L105M	Gnomad only	NA	NA	NA	105	L	105	1
1931	KCNJ2	I106T	Gnomad only	NA	NA	NA	106	I	106	1
1960	KCNJ2	L108V	Gnomad only	NA	NA	NA	108	L	108	1
1961	KCNJ2	L109F	Gnomad only	NA	NA	NA	109	L	109	1
1962	KCNJ2	L109P	Clinvar only	Uncertain significance	NA	Short QT syndrome 3|Andersen Tawil syndrome	109	L	109	1
1929	KCNJ2	H110Y	Clinvar only	Uncertain significance	NA	not provided	110	H	110	1
1874	KCNJ2	D114G	Clinvar only	Uncertain significance	NA	Short QT syndrome 3|Andersen Tawil syndrome|Atrial fibrillation, familial, 9	114	D	114	1
1849	KCNJ2	A115V	Clinvar only	Uncertain significance	NA	Atrial fibrillation, familial, 9|Short QT syndrome 3|Andersen Tawil syndrome	115	A	115	1
2035	KCNJ2	S116P	Clinvar only	Uncertain significance	NA	not provided	116	S	124	1
1896	KCNJ2	E118D	Gnomad only	NA	NA	NA	118	E	126	1
1952	KCNJ2	K120T	Clinvar & Gnomad	Uncertain significance	432434	not provided|Andersen Tawil syndrome|Short QT syndrome 3	120	K	128	1
1866	KCNJ2	C122Y	Clinvar only	Uncertain significance	NA	Cardiovascular phenotype	122	C	130	1
2078	KCNJ2	V123G	Clinvar only	Uncertain significance	NA	Congenital long QT syndrome	123	V	131	1
1897	KCNJ2	E125K	Clinvar only	Uncertain significance	NA	Andersen Tawil syndrome|Short QT syndrome 3	125	E	133	1
1906	KCNJ2	F129S	Gnomad only	NA	NA	NA	129	F	137	1
2053	KCNJ2	T130A	Clinvar only	Uncertain significance	NA	Andersen Tawil syndrome	130	T	138	1
2054	KCNJ2	T130M	Clinvar & Gnomad	Uncertain significance	969996	not provided|Short QT syndrome 3|Andersen Tawil syndrome	130	T	138	1
1850	KCNJ2	A132T	Clinvar only	Uncertain significance	NA	Andersen Tawil syndrome|Short QT syndrome 3	132	A	140	1
1963	KCNJ2	L134I	Gnomad only	NA	NA	NA	134	L	142	1
2036	KCNJ2	S136F	Clinvar only	Uncertain significance	NA	Congenital long QT syndrome	136	S	144	1
1932	KCNJ2	I137N	Clinvar only	Uncertain significance	NA	Short QT syndrome 3|Andersen Tawil syndrome	137	I	145	1
1933	KCNJ2	I137T	Gnomad only	NA	NA	NA	137	I	145	1
2055	KCNJ2	T139I	Clinvar only	Uncertain significance	NA	Short QT syndrome 3|Andersen Tawil syndrome|not provided	139	T	147	1
1913	KCNJ2	G144A	Clinvar only	Pathogenic	NA	Andersen Tawil syndrome|Short QT syndrome 3|Congenital long QT syndrome	144	G	152	1
1914	KCNJ2	G144D	Clinvar only	Pathogenic	NA	not provided|Andersen Tawil syndrome|Short QT syndrome 3|Atrial fibrillation, familial, 9|Andersen Tawil syndrome|Short QT syndrome 3|Congenital long QT syndrome|Atrial fibrillation, familial, 1|Andersen Tawil syndrome|Short QT syndrome 1	144	G	152	1
1915	KCNJ2	G144S	Clinvar only	Pathogenic	NA	Andersen Tawil syndrome|Short QT syndrome 3|Congenital long QT syndrome	144	G	152	1
2097	KCNJ2	Y145C	Clinvar only	Pathogenic	NA	Andersen Tawil syndrome|Short QT syndrome 3	145	Y	153	1
1916	KCNJ2	G146A	Clinvar only	Uncertain significance	NA	Congenital long QT syndrome	146	G	154	1
1917	KCNJ2	G146D	Clinvar only	Uncertain significance	NA	Andersen Tawil syndrome|Short QT syndrome 3|Congenital long QT syndrome	146	G	154	1
1918	KCNJ2	G146R	Clinvar only	Uncertain significance	NA	not provided	146	G	154	1
1919	KCNJ2	G146S	Clinvar only	Uncertain significance	NA	Congenital long QT syndrome	146	G	154	1
2056	KCNJ2	T151M	Gnomad only	NA	NA	NA	151	T	159	1
1867	KCNJ2	C154F	Clinvar only	Uncertain significance	NA	Congenital long QT syndrome	154	C	162	1
1868	KCNJ2	C154Y	Clinvar only	Conflicting interpretations of pathogenicity	NA	Andersen Tawil syndrome|Andersen Tawil syndrome|Short QT syndrome 3	154	C	162	1
1934	KCNJ2	I156V	Gnomad only	NA	NA	NA	156	I	164	1
1907	KCNJ2	F159L	Gnomad only	NA	NA	NA	159	F	167	1
1908	KCNJ2	F159S	Gnomad only	NA	NA	NA	159	F	167	1
1973	KCNJ2	M160V	Gnomad only	NA	NA	NA	160	M	168	1
2079	KCNJ2	V161M	Clinvar only	Uncertain significance	NA	Andersen Tawil syndrome|Short QT syndrome 3	161	V	169	1
1935	KCNJ2	I166V	Gnomad only	NA	NA	NA	166	I	174	1
2080	KCNJ2	V167L	Clinvar only	Uncertain significance	NA	Andersen Tawil syndrome|Short QT syndrome 3	167	V	175	1
2081	KCNJ2	V167M	Gnomad only	NA	NA	NA	167	V	175	1
1936	KCNJ2	I170M	Clinvar only	Uncertain significance	NA	Cardiovascular phenotype	170	I	178	1
1937	KCNJ2	I171V	Clinvar & Gnomad	Uncertain significance	964778	Andersen Tawil syndrome|Short QT syndrome 3	171	I	179	1
1875	KCNJ2	D172N	Clinvar only	Pathogenic	NA	short QT syndrome|Short QT syndrome 3|Andersen Tawil syndrome|Short QT syndrome 3	172	D	180	1
1938	KCNJ2	I175L	Clinvar & Gnomad	Uncertain significance	1060569	Andersen Tawil syndrome|Short QT syndrome 3	175	I	183	1
1920	KCNJ2	G177S	Clinvar only	Uncertain significance	NA	not provided	177	G	185	1
1851	KCNJ2	A178S	Gnomad only	NA	NA	NA	178	A	186	1
1852	KCNJ2	A178T	Clinvar only	Uncertain significance	NA	Andersen Tawil syndrome|Short QT syndrome 3	178	A	186	1
2082	KCNJ2	V179I	Gnomad only	NA	NA	NA	179	V	187	1
1989	KCNJ2	P186L	Clinvar only	Pathogenic	NA	Andersen Tawil syndrome|Congenital long QT syndrome	186	P	194	1
1990	KCNJ2	P186Q	Clinvar only	Pathogenic	NA	Short QT syndrome 3|Andersen Tawil syndrome	186	P	194	1
2000	KCNJ2	R189G	Clinvar only	Pathogenic	NA	not provided	189	R	197	1
2001	KCNJ2	R189I	Clinvar only	Pathogenic	NA	not provided|Congenital long QT syndrome	189	R	197	1
2002	KCNJ2	R189K	Clinvar only	Pathogenic	NA	not provided	189	R	197	1
2003	KCNJ2	R189T	Clinvar only	Uncertain significance	NA	Andersen Tawil syndrome|Short QT syndrome 3	189	R	197	1
1980	KCNJ2	N190I	Clinvar only	Uncertain significance	NA	Andersen Tawil syndrome|Short QT syndrome 3	190	N	198	1
2057	KCNJ2	T192A	Clinvar only	Pathogenic	NA	Andersen Tawil syndrome|Congenital long QT syndrome	192	T	200	1
2058	KCNJ2	T192I	Clinvar only	Uncertain significance	NA	Congenital long QT syndrome	192	T	200	1
1964	KCNJ2	L193H	Clinvar only	Uncertain significance	NA	Short QT syndrome 3|Andersen Tawil syndrome|not specified	193	L	201	1
1965	KCNJ2	L193P	Clinvar only	Conflicting interpretations of pathogenicity	NA	Andersen Tawil syndrome|not provided	193	L	201	1
1853	KCNJ2	A202T	Gnomad only	NA	NA	NA	202	A	210	1
1879	KCNJ2	D205E	Gnomad only	NA	NA	NA	205	D	213	1
1922	KCNJ2	G206S	Clinvar & Gnomad	Uncertain significance	281601	Short QT syndrome 3|Andersen Tawil syndrome|not specified|not provided	206	G	214	1
2004	KCNJ2	R213G	Clinvar only	Pathogenic	NA	not provided	213	R	221	1
2005	KCNJ2	R213Q	Gnomad only	NA	NA	NA	213	R	221	1
1923	KCNJ2	G215D	Clinvar only	Pathogenic	NA	Andersen Tawil syndrome|Short QT syndrome 3|Andersen Tawil syndrome|Congenital long QT syndrome	215	G	223	1
1981	KCNJ2	N216H	Clinvar only	Pathogenic	NA	Andersen Tawil syndrome|Congenital long QT syndrome	216	N	224	1
1982	KCNJ2	N216I	Clinvar only	Uncertain significance	NA	Short QT syndrome 3|Andersen Tawil syndrome	216	N	224	1
1966	KCNJ2	L217P	Clinvar only	Uncertain significance	NA	Congenital long QT syndrome	217	L	225	1
2006	KCNJ2	R218L	Clinvar only	Conflicting interpretations of pathogenicity	NA	not provided|Andersen Tawil syndrome|Short QT syndrome 3	218	R	226	1
2007	KCNJ2	R218P	Clinvar only	Pathogenic	NA	not provided	218	R	226	1
2008	KCNJ2	R218Q	Clinvar only	Pathogenic	NA	not provided|Andersen Tawil syndrome|Andersen Tawil syndrome|Short QT syndrome 3|Congenital long QT syndrome	218	R	226	1
2009	KCNJ2	R218W	Clinvar only	Pathogenic	NA	Congenital long QT syndrome|Short QT syndrome 3|Andersen Tawil syndrome|not provided|Andersen Tawil syndrome	218	R	226	1
2037	KCNJ2	S220N	Clinvar only	Uncertain significance	NA	Andersen Tawil syndrome|Short QT syndrome 3	220	S	228	1
1967	KCNJ2	L222S	Clinvar only	Pathogenic	NA	not provided	222	L	230	1
2083	KCNJ2	V223G	Clinvar only	Uncertain significance	NA	Short QT syndrome 3|Andersen Tawil syndrome	223	V	231	1
[truncated: 886 more rows]
