# Supplementary material for: Determinants of trafficking, conduction, and disease within a K+ channel revealed through multiparametric deep mutational scanning
Source: eLife. 2022 May 31;11:e76903. doi: 10.7554/eLife.76903 (PMC9273215; doi:10.7554/eLife.76903)
Supplement: Supplementary file 2. — Residue interaction as identified in the Protein Contact Atlas (Kayikci et al., 2018) for the closed state (PDB 3SPI) and the forced-open state (PDB 6M84) of chicken Kir2.2. Listed for each contact: chains, secondary structure, residue number, amino acid, atom types, chain types, distance (in Angstrom), and contact type. [file elife-76903-supp2.csv]

Supplementary File 2: Protein Contact Atlas / Residue-Residue Interactions
PDB		PDB identifier (3SPI or 6M84)
Chain 1		Chain ID of first residue involved in contact
Chain 2		Chain ID of second residue involved in contact
SS1		Secondary Structure of first residue involved in contact
SS2		Secondary Structure of second residue involved in contact
Res1		First residue involved in contact
ResNum1		Number of first residue involved in contact
Res2		Second residue involved in contact
ResNum2		Number of second residue involved in contact
Atoms		Atoms involved in the interaction
Chain Types		M = Main Chain Atom, S = Side Chain Atom
Distance		in Angstrom
Contact type		type of interaction
PDB	Chain1	Chain2	SS1	SS2	Res1	ResNum1	Res2	ResNum2	Atoms	Chain Types	Distance	Contact type
PDB_3SPI	A	C	LOOP1	SHEET37_37	N	43	E	333	N-OE2	M-S	3.06948	hydrogen,polar,
PDB_3SPI	A	C	LOOP1	SHEET37_37	N	43	E	333	ND2-OE2	S-S	2.64959	hydrogen,polar,
PDB_3SPI	A	C	LOOP1	SHEET38_38	N	43	Y	338	O-OH	M-S	3.40322	polar,
PDB_3SPI	A	C	LOOP1	SHEET38_38	N	43	Y	338	OD1-CE1	S-S	3.25184	weakpolar,
PDB_3SPI	A	C	LOOP1	LOOP11	F	45	V	265	CZ-CG2	S-S	4.12214	hydrophobic,
PDB_3SPI	A	C	LOOP1	LOOP11	F	45	V	265	CZ-CB	S-S	3.8131	hydrophobic,
PDB_3SPI	A	C	LOOP1	LOOP11	F	45	V	265	CZ-CG1	S-S	3.8999	hydrophobic,
PDB_3SPI	A	C	LOOP1	SHEET38_38	F	45	Y	338	CD1-CD1	S-S	3.73828	hydrophobic,pi-pi,
PDB_3SPI	A	C	LOOP1	SHEET38_38	F	45	Y	338	CB-CE1	S-S	4.04898	hydrophobic,
PDB_3SPI	A	A	LOOP1	LOOP1	V	46	R	44	O-CG	M-S	2.88838	weakpolar,
PDB_3SPI	A	A	LOOP1	LOOP1	V	46	R	44	O-CD	M-S	2.83537	weakpolar,
PDB_3SPI	A	A	LOOP1	LOOP1	V	46	R	44	O-NE	M-S	2.71363	polar,
PDB_3SPI	A	A	LOOP1	LOOP1	N	49	K	47	OD1-CB	S-S	3.17015	weakpolar,
PDB_3SPI	A	A	LOOP1	LOOP1	G	50	V	46	O-CG1	M-S	3.48433	weakhydrogen,weakpolar,
PDB_3SPI	A	A	LOOP1	LOOP1	G	50	K	47	N-O	M-M	3.2441	hydrogen,polar,
PDB_3SPI	A	A	LOOP1	LOOP1	G	50	K	48	N-O	M-M	3.15447	hydrogen,polar,
PDB_3SPI	A	A	LOOP1	LOOP1	Q	51	K	47	O-N	M-M	2.70429	hydrogen,polar,
PDB_3SPI	A	A	LOOP1	LOOP1	Q	51	K	47	O-CB	M-S	3.36635	weakpolar,
PDB_3SPI	A	A	LOOP1	LOOP1	Q	51	K	47	CB-CD	S-S	4.20247	hydrophobic,
PDB_3SPI	A	A	LOOP1	LOOP1	Q	51	N	49	CB-OD1	S-S	3.08699	weakpolar,
PDB_3SPI	A	A	LOOP1	LOOP1	Q	51	N	49	N-OD1	M-S	2.9952	hydrogen,polar,
PDB_3SPI	A	A	LOOP1	LOOP1	C	52	V	46	SG-CG2	S-S	4.03675	weakhydrogen,
PDB_3SPI	A	A	LOOP1	LOOP1	C	52	G	50	N-O	M-M	3.24515	polar,
PDB_3SPI	A	C	LOOP1	LOOP8	C	52	H	222	SG-NE2	S-S	3.25942	polar,
PDB_3SPI	A	C	LOOP1	LOOP11	C	52	V	265	CB-CG1	S-S	4.22619	hydrophobic,
PDB_3SPI	A	A	LOOP1	LOOP1	N	53	R	44	CB-O	S-M	3.31729	weakpolar,
PDB_3SPI	A	A	LOOP1	LOOP1	N	53	R	44	ND2-O	S-M	3.4327	hydrogen,polar,
PDB_3SPI	A	A	LOOP1	LOOP1	N	53	F	45	N-O	M-M	2.78392	hydrogen,polar,
PDB_3SPI	A	A	LOOP1	LOOP1	N	53	K	47	OD1-CE	S-S	3.63231	weakhydrogen,
PDB_3SPI	A	C	LOOP1	LOOP18	N	53	N	336	ND2-O	S-M	3.06329	hydrogen,polar,
PDB_3SPI	A	C	LOOP1	SHEET38_38	N	53	Y	338	O-CD1	M-S	3.52369	weakhydrogen,
PDB_3SPI	A	A	LOOP1	LOOP1	V	54	F	45	CB-CE1	S-S	4.11716	hydrophobic,
PDB_3SPI	A	C	LOOP1	LOOP11	V	54	V	265	CG1-CG1	S-S	3.54851	hydrophobic,
PDB_3SPI	A	C	LOOP1	SHEET38_38	V	54	Y	338	CA-O	M-M	3.07562	weakhydrogen,weakpolar,
PDB_3SPI	A	C	LOOP1	SHEET38_38	V	54	Y	338	C-O	M-M	3.32131	carbonyl,
PDB_3SPI	A	C	LOOP1	SHEET38_38	V	54	Y	338	CG2-O	S-M	3.5881	weakhydrogen,
PDB_3SPI	A	C	LOOP1	SHEET38_38	V	54	V	340	CG2-CG2	S-S	3.77656	hydrophobic,
PDB_3SPI	A	C	LOOP1	LOOP8	E	55	K	220	OE2-CD	S-S	3.46651	weakhydrogen,weakpolar,
PDB_3SPI	A	C	LOOP1	LOOP8	E	55	K	220	OE2-NZ	S-S	3.69901	hydrogen,ionic,
PDB_3SPI	A	C	LOOP1	SHEET38_38	E	55	Y	338	N-O	M-M	2.81472	hydrogen,polar,
PDB_3SPI	A	C	LOOP1	SHEET38_38	E	55	K	339	O-CA	M-M	3.26743	weakhydrogen,weakpolar,
PDB_3SPI	A	C	LOOP1	SHEET38_38	E	55	K	339	O-C	M-M	3.45432	carbonyl,
PDB_3SPI	A	C	LOOP1	SHEET38_38	E	55	K	339	O-CG	M-S	3.47974	weakhydrogen,weakpolar,
PDB_3SPI	A	C	LOOP1	SHEET38_38	E	55	K	339	CB-CG	S-S	4.04162	hydrophobic,
PDB_3SPI	A	C	LOOP1	SHEET38_38	E	55	V	340	O-N	M-M	2.73126	hydrogen,polar,
PDB_3SPI	A	C	LOOP1	SHEET29_29	F	56	N	217	CZ-O	S-M	3.33015	weakpolar,
PDB_3SPI	A	C	LOOP1	SHEET29_29	F	56	N	217	CD2-O	S-M	3.47523	weakpolar,
PDB_3SPI	A	C	LOOP1	SHEET29_29	F	56	N	217	CE2-O	S-M	2.84971	weakpolar,
PDB_3SPI	A	C	LOOP1	LOOP8	F	56	R	219	CE2-O	S-M	3.40612	weakhydrogen,weakpolar,
PDB_3SPI	A	C	LOOP1	LOOP11	F	56	V	265	CZ-O	S-M	3.3223	weakhydrogen,weakpolar,
PDB_3SPI	A	C	LOOP1	SHEET38_38	F	56	V	340	CD1-CB	S-S	3.8319	hydrophobic,
PDB_3SPI	A	C	LOOP1	SHEET38_38	F	56	V	340	CD1-CG2	S-S	3.76474	hydrophobic,
PDB_3SPI	A	C	LOOP1	SHEET38_38	F	56	V	340	CE1-CG2	S-S	3.87883	hydrophobic,
PDB_3SPI	A	C	LOOP1	HELIX23	F	56	Y	342	CZ-OH	S-S	3.79226	donorpi
PDB_3SPI	A	C	LOOP1	HELIX23	F	56	Y	342	CE2-OH	S-S	3.92514	donorpi
PDB_3SPI	A	C	LOOP1	HELIX23	F	56	Y	342	CE1-OH	S-S	3.86547	donorpi
PDB_3SPI	A	C	LOOP1	HELIX23	F	56	Y	342	CD1-CE1	S-S	3.61394	hydrophobic,pi-pi,
PDB_3SPI	A	C	LOOP1	HELIX23	F	56	Y	342	CB-CD1	S-S	4.07417	hydrophobic,
PDB_3SPI	A	C	LOOP1	HELIX23	F	56	Y	342	CB-CE1	S-S	3.68937	hydrophobic,
PDB_3SPI	A	C	LOOP1	HELIX23	F	56	Y	342	CG-CE1	S-S	3.5019	hydrophobic,pi-pi,
PDB_3SPI	A	C	LOOP1	SHEET38_38	T	57	K	339	CG2-CG	S-S	3.61988	hydrophobic,
PDB_3SPI	A	C	LOOP1	SHEET38_38	T	57	K	339	CG2-CD	S-S	3.58412	hydrophobic,
PDB_3SPI	A	C	LOOP1	SHEET38_38	T	57	V	340	N-O	M-M	2.83061	hydrogen,polar,
PDB_3SPI	A	C	LOOP1	SHEET38_38	T	57	V	340	OG1-O	S-M	3.19046	hydrogen,polar,
PDB_3SPI	A	C	LOOP1	LOOP19	T	57	D	341	OG1-CA	S-M	3.71113	weakhydrogen,
PDB_3SPI	A	C	LOOP1	HELIX23	T	57	Y	342	O-CB	M-S	3.53287	weakhydrogen,
PDB_3SPI	A	C	LOOP1	HELIX23	T	57	Y	342	O-N	M-M	3.09762	hydrogen,polar,
PDB_3SPI	A	C	LOOP1	LOOP19	N	58	D	341	CB-OD1	S-S	3.13561	weakpolar,
PDB_3SPI	A	C	LOOP1	HELIX23	N	58	Y	342	O-C	M-M	3.58094	carbonyl,
PDB_3SPI	A	C	LOOP1	HELIX23	N	58	Y	342	O-CB	M-S	3.23573	weakpolar,
PDB_3SPI	A	C	LOOP1	HELIX23	N	58	S	343	O-N	M-M	3.3871	polar,
PDB_3SPI	A	A	LOOP1	LOOP1	M	59	F	56	CG-CB	S-S	4.13477	hydrophobic,
PDB_3SPI	A	A	LOOP1	LOOP1	M	59	F	56	SD-CB	S-S	4.02734	hydrophobic,
PDB_3SPI	A	A	LOOP1	LOOP1	M	59	T	57	N-O	M-M	2.87873	polar,
PDB_3SPI	A	C	LOOP1	LOOP8	M	59	L	218	CE-CD1	S-S	4.11814	hydrophobic,
PDB_3SPI	A	C	LOOP1	LOOP8	M	59	L	218	CE-CB	S-S	3.28683	hydrophobic,
PDB_3SPI	A	C	LOOP1	LOOP8	M	59	L	218	CE-CG	S-S	3.81478	hydrophobic,
PDB_3SPI	A	C	LOOP1	LOOP8	M	59	L	218	CE-CD2	S-S	3.56177	hydrophobic,
PDB_3SPI	A	C	LOOP1	LOOP8	M	59	L	218	SD-CB	S-S	4.19383	hydrophobic,
PDB_3SPI	A	C	LOOP1	HELIX23	M	59	Y	342	CG-CG	S-S	3.88367	hydrophobic,
PDB_3SPI	A	C	LOOP1	HELIX23	M	59	Y	342	CG-CD1	S-S	3.53968	hydrophobic,
PDB_3SPI	A	C	LOOP1	HELIX23	M	59	Y	342	CG-CE1	S-S	4.07147	hydrophobic,
PDB_3SPI	A	A	LOOP1	LOOP1	D	60	N	58	N-O	M-M	3.28601	polar,
PDB_3SPI	A	A	HELIX1	LOOP1	D	61	M	59	N-O	M-M	3.01639	hydrogen,polar,
PDB_3SPI	A	A	HELIX1	LOOP1	K	62	M	59	CB-CE	S-S	3.89488	hydrophobic,
PDB_3SPI	A	A	HELIX1	LOOP1	K	62	M	59	CG-CE	S-S	3.67971	hydrophobic,
PDB_3SPI	A	A	HELIX1	LOOP1	K	62	M	59	CD-CE	S-S	4.05525	hydrophobic,
PDB_3SPI	A	A	HELIX1	LOOP1	K	62	M	59	CB-CB	S-S	4.11408	hydrophobic,
PDB_3SPI	A	A	HELIX1	LOOP1	K	62	M	59	CG-SD	S-S	4.13757	hydrophobic,
PDB_3SPI	A	A	HELIX1	LOOP1	K	62	M	59	CD-SD	S-S	3.82395	hydrophobic,
PDB_3SPI	A	A	HELIX1	LOOP1	K	62	D	60	N-O	M-M	2.53017	hydrogen,polar,
PDB_3SPI	A	A	HELIX1	LOOP1	P	63	D	60	CD-O	S-M	3.30352	weakpolar,
PDB_3SPI	A	A	HELIX1	HELIX1	P	63	D	61	CD-O	S-M	3.41724	weakpolar,
PDB_3SPI	A	A	HELIX1	HELIX1	Q	64	D	61	N-O	M-M	2.89569	hydrogen,polar,
PDB_3SPI	A	A	HELIX1	HELIX1	R	65	D	61	CG-CB	S-S	3.89133	hydrophobic,
PDB_3SPI	A	A	HELIX1	HELIX1	R	65	D	61	N-O	M-M	3.10709	hydrogen,polar,
PDB_3SPI	A	C	HELIX1	HELIX20	R	65	Q	192	NH1-O	S-M	2.66649	hydrogen,polar,
PDB_3SPI	A	C	HELIX1	HELIX20	R	65	Q	192	CD-O	S-M	3.50953	weakhydrogen,
PDB_3SPI	A	C	HELIX1	HELIX20	R	65	Q	192	CB-O	S-M	3.61625	weakhydrogen,
PDB_3SPI	A	C	HELIX1	SHEET27_27	R	65	L	194	NH1-O	S-M	3.5148	hydrogen,
PDB_3SPI	A	A	HELIX1	HELIX1	Y	66	K	62	N-O	M-M	2.99691	hydrogen,polar,
PDB_3SPI	A	A	HELIX1	HELIX1	Y	66	K	62	CD2-O	S-M	2.82611	weakpolar,
PDB_3SPI	A	A	HELIX1	HELIX1	Y	66	K	62	CB-O	S-M	3.22052	weakpolar,
PDB_3SPI	A	A	HELIX1	HELIX1	Y	66	K	62	CD2-CG	S-S	3.69854	hydrophobic,
PDB_3SPI	A	A	HELIX1	HELIX1	Y	66	K	62	CE2-CG	S-S	3.39334	hydrophobic,
PDB_3SPI	A	A	HELIX1	HELIX1	Y	66	P	63	N-O	M-M	3.46103	hydrogen,polar,
PDB_3SPI	A	C	HELIX1	LOOP8	Y	66	L	218	OH-O	S-M	2.66212	hydrogen,polar,
PDB_3SPI	A	C	HELIX1	LOOP8	Y	66	R	219	O-NH2	M-S	3.98306	cationpi
PDB_3SPI	A	C	HELIX1	LOOP8	Y	66	R	219	CD1-CZ	S-S	3.90746	cationpi
PDB_3SPI	A	C	HELIX1	LOOP8	Y	66	R	219	CD1-NH2	S-S	3.80135	cationpi
PDB_3SPI	A	C	HELIX1	LOOP8	Y	66	R	219	CE1-CZ	S-S	3.87728	cationpi
PDB_3SPI	A	C	HELIX1	LOOP8	Y	66	R	219	OH-CA	S-M	3.58203	weakhydrogen,
PDB_3SPI	A	A	HELIX1	HELIX1	I	67	P	63	N-O	M-M	3.27125	hydrogen,polar,
PDB_3SPI	A	A	HELIX1	HELIX1	I	67	P	63	CG1-O	S-M	3.16525	weakhydrogen,weakpolar,
PDB_3SPI	A	A	HELIX1	HELIX1	I	67	Q	64	CB-O	S-M	3.78009	weakhydrogen,
PDB_3SPI	A	C	HELIX1	HELIX20	A	68	K	189	O-CB	M-S	3.63686	weakhydrogen,
PDB_3SPI	A	C	HELIX1	HELIX20	A	68	K	189	O-CD	M-S	3.46625	weakhydrogen,weakpolar,
PDB_3SPI	A	A	HELIX1	HELIX1	D	69	R	65	N-O	M-M	3.41481	hydrogen,polar,
PDB_3SPI	A	A	HELIX1	HELIX1	D	69	Y	66	N-O	M-M	3.49521	polar,
PDB_3SPI	A	A	HELIX1	HELIX1	D	69	Y	66	C-O	M-M	3.44607	carbonyl,
PDB_3SPI	A	C	HELIX1	HELIX20	D	69	K	189	OD1-CB	S-S	3.4697	weakpolar,
PDB_3SPI	A	C	HELIX1	HELIX20	D	69	K	189	CB-O	S-M	3.49566	weakpolar,
PDB_3SPI	A	C	HELIX1	HELIX20	D	69	R	190	OD1-N	S-M	3.0107	polar,
PDB_3SPI	A	C	HELIX1	HELIX20	D	69	R	190	OD1-CA	S-M	3.1298	weakpolar,
PDB_3SPI	A	C	HELIX1	HELIX20	D	69	R	190	OD2-CD	S-S	3.24895	weakpolar,
PDB_3SPI	A	C	HELIX1	HELIX20	D	69	R	190	OD2-CA	S-M	3.48421	weakhydrogen,weakpolar,
PDB_3SPI	A	C	HELIX1	LOOP5	D	69	T	193	OD2-OG1	S-S	3.06186	hydrogen,polar,
PDB_3SPI	A	C	HELIX1	LOOP5	D	69	T	193	CB-CG2	S-S	4.0224	hydrophobic,
PDB_3SPI	A	C	HELIX1	LOOP8	D	69	R	219	OD2-NE	S-S	2.68227	ionic,polar,
PDB_3SPI	A	C	HELIX1	LOOP8	D	69	R	219	OD2-CZ	S-S	3.4491	ionic,
PDB_3SPI	A	C	HELIX1	LOOP8	D	69	R	219	OD2-NH2	S-S	3.39791	hydrogen,ionic,polar,
PDB_3SPI	A	C	HELIX1	LOOP8	D	69	R	219	O-NH2	M-S	3.32146	hydrogen,polar,
PDB_3SPI	A	A	HELIX1	HELIX1	M	70	Y	66	N-O	M-M	2.824	polar,
PDB_3SPI	A	A	HELIX1	HELIX1	M	70	Y	66	CA-O	M-M	2.96105	weakpolar,
PDB_3SPI	A	A	HELIX1	HELIX1	M	70	Y	66	CB-O	S-M	3.47009	weakpolar,
PDB_3SPI	A	A	HELIX1	HELIX1	M	70	I	67	CE-O	S-M	3.4344	weakhydrogen,weakpolar,
PDB_3SPI	A	A	HELIX1	HELIX1	M	70	I	67	CE-CG2	S-S	3.7984	hydrophobic,
PDB_3SPI	A	A	HELIX1	HELIX1	M	70	I	67	N-O	M-M	3.36272	hydrogen,polar,
PDB_3SPI	A	A	HELIX1	HELIX1	M	70	I	67	CB-O	S-M	3.03851	weakpolar,
PDB_3SPI	A	A	HELIX1	HELIX1	M	70	I	67	CE-CD1	S-S	3.91317	hydrophobic,
PDB_3SPI	A	A	HELIX1	HELIX1	F	71	D	69	N-O	M-M	2.85359	polar,
PDB_3SPI	A	C	HELIX1	HELIX20	F	71	M	184	CG-O	S-M	3.31517	weakpolar,
PDB_3SPI	A	C	HELIX1	HELIX20	F	71	M	184	CE1-CG	S-S	3.72456	hydrophobic,
PDB_3SPI	A	C	HELIX1	HELIX20	F	71	M	184	CE1-SD	S-S	3.96464	hydrophobic,
PDB_3SPI	A	C	HELIX1	HELIX20	F	71	M	184	CD1-CG	S-S	3.89372	hydrophobic,
PDB_3SPI	A	C	HELIX1	HELIX20	F	71	A	185	CD2-CA	S-M	4.08715	carbonpi
PDB_3SPI	A	C	HELIX1	HELIX20	F	71	A	185	CE2-CA	S-M	3.77265	carbonpi
PDB_3SPI	A	C	HELIX1	HELIX20	F	71	A	185	CZ-CA	S-M	3.92739	carbonpi
PDB_3SPI	A	C	HELIX1	HELIX20	F	71	A	185	CE2-CB	S-S	4.11495	hydrophobic,
PDB_3SPI	A	C	HELIX1	HELIX20	F	71	A	185	CZ-CB	S-S	3.93133	hydrophobic,
PDB_3SPI	A	A	HELIX1	HELIX1	T	72	D	69	OG1-OD1	S-S	2.75103	polar,
PDB_3SPI	A	A	HELIX1	HELIX1	T	72	D	69	OG1-OD2	S-S	3.21576	polar,
PDB_3SPI	A	A	HELIX1	HELIX1	T	72	D	69	OG1-O	S-M	3.2656	polar,
PDB_3SPI	A	A	HELIX1	HELIX1	T	72	D	69	N-O	M-M	2.71342	hydrogen,polar,
PDB_3SPI	A	A	HELIX1	HELIX1	T	72	D	69	CB-O	S-M	3.28233	weakpolar,
PDB_3SPI	A	A	HELIX1	HELIX1	T	72	D	69	CA-O	M-M	3.49968	weakpolar,
PDB_3SPI	A	A	HELIX1	HELIX1	T	72	M	70	N-O	M-M	3.23006	polar,
PDB_3SPI	A	A	HELIX1	HELIX1	T	73	M	70	N-O	M-M	3.19211	hydrogen,polar,
PDB_3SPI	A	A	HELIX1	HELIX1	T	73	F	71	N-O	M-M	3.3164	polar,
PDB_3SPI	A	C	HELIX1	LOOP8	T	73	R	219	OG1-NH2	S-S	2.75117	hydrogen,polar,
PDB_3SPI	A	C	HELIX1	LOOP8	T	73	R	219	OG1-NH1	S-S	2.81112	hydrogen,polar,
PDB_3SPI	A	A	HELIX1	HELIX1	C	74	M	70	N-O	M-M	3.2263	hydrogen,polar,
PDB_3SPI	A	A	HELIX1	HELIX1	C	74	F	71	N-O	M-M	3.27866	hydrogen,polar,
PDB_3SPI	A	A	HELIX1	HELIX1	C	74	F	71	CB-O	S-M	3.55498	weakhydrogen,
PDB_3SPI	A	A	HELIX1	HELIX1	V	75	F	71	CG2-O	S-M	3.57494	weakhydrogen,
PDB_3SPI	A	A	HELIX1	HELIX1	V	75	F	71	N-O	M-M	3.53577	hydrogen,
PDB_3SPI	A	A	HELIX1	HELIX1	V	75	T	72	CG2-O	S-M	3.13942	weakpolar,
PDB_3SPI	A	A	HELIX1	HELIX1	V	75	T	73	N-O	M-M	2.97159	polar,
PDB_3SPI	A	A	LOOP2	HELIX1	D	76	T	73	N-O	M-M	2.88958	hydrogen,polar,
PDB_3SPI	A	A	LOOP2	HELIX1	I	77	T	73	CG2-O	S-M	3.37006	weakhydrogen,weakpolar,
PDB_3SPI	A	A	LOOP2	HELIX1	I	77	T	73	N-O	M-M	3.46158	hydrogen,polar,
PDB_3SPI	A	A	LOOP2	HELIX1	I	77	C	74	CG1-O	S-M	3.27623	weakhydrogen,weakpolar,
PDB_3SPI	A	D	HELIX2	HELIX28	W	79	F	175	CZ3-CZ	S-S	3.91076	hydrophobic,pi-pi,
PDB_3SPI	A	A	HELIX2	HELIX2	R	80	R	78	N-O	M-M	3.34532	polar,
PDB_3SPI	A	A	HELIX2	HELIX2	R	80	R	78	CG-CB	S-S	4.11529	hydrophobic,
PDB_3SPI	A	A	HELIX2	HELIX2	Y	81	R	78	N-O	M-M	3.01836	hydrogen,polar,
PDB_3SPI	A	A	HELIX2	HELIX2	Y	81	R	78	CB-O	S-M	3.3602	weakhydrogen,weakpolar,
PDB_3SPI	A	A	HELIX2	HELIX2	Y	81	R	78	CD2-CB	S-S	3.63988	hydrophobic,
PDB_3SPI	A	A	HELIX2	HELIX2	Y	81	R	78	CE2-CB	S-S	3.90018	hydrophobic,
PDB_3SPI	A	A	HELIX2	HELIX2	Y	81	R	78	CD2-CG	S-S	3.87632	hydrophobic,
PDB_3SPI	A	A	HELIX2	HELIX2	Y	81	R	78	CE2-CG	S-S	3.73319	hydrophobic,
PDB_3SPI	A	A	HELIX2	HELIX2	Y	81	W	79	C-O	M-M	3.50197	carbonyl,
PDB_3SPI	A	A	HELIX2	HELIX2	Y	81	W	79	N-O	M-M	2.83966	polar,
PDB_3SPI	A	A	HELIX2	HELIX2	Y	81	R	80	N-CG	M-S	3.0512	carbonpi
PDB_3SPI	A	A	HELIX2	HELIX2	Y	81	R	80	CA-CG	M-S	4.20803	carbonpi
PDB_3SPI	A	A	HELIX2	HELIX2	Y	81	R	80	CG-CG	S-S	3.94697	carbonpi
PDB_3SPI	A	A	HELIX2	HELIX2	Y	81	R	80	CD1-CG	S-S	3.5332	carbonpi
PDB_3SPI	A	A	HELIX2	HELIX2	Y	81	R	80	CE1-CG	S-S	3.6733	carbonpi
PDB_3SPI	A	A	HELIX2	HELIX2	Y	81	R	80	CE1-CD	S-S	3.82243	carbonpi
PDB_3SPI	A	A	HELIX2	HELIX2	Y	81	R	80	CZ-CD	S-S	4.10677	carbonpi
PDB_3SPI	A	A	HELIX2	HELIX1	M	82	C	74	CG-SG	S-S	3.86844	weakhydrogen,
PDB_3SPI	A	A	HELIX2	LOOP2	M	82	I	77	CB-CG1	S-S	4.05758	hydrophobic,
PDB_3SPI	A	A	HELIX2	LOOP2	M	82	I	77	CB-CD1	S-S	3.94269	hydrophobic,
PDB_3SPI	A	A	HELIX2	HELIX2	M	82	R	78	N-O	M-M	3.17419	hydrogen,polar,
PDB_3SPI	A	A	HELIX2	HELIX2	M	82	W	79	N-O	M-M	2.77095	hydrogen,polar,
PDB_3SPI	A	A	HELIX2	HELIX2	M	82	W	79	CA-O	M-M	3.42846	weakpolar,
PDB_3SPI	A	A	HELIX2	HELIX2	M	82	W	79	C-O	M-M	3.58802	carbonyl,
PDB_3SPI	A	A	HELIX2	HELIX2	M	82	W	79	CE-CE3	S-S	4.05517	hydrophobic,
PDB_3SPI	A	A	HELIX2	HELIX2	M	82	W	79	CE-CZ3	S-S	3.88272	hydrophobic,
PDB_3SPI	A	A	HELIX2	HELIX2	L	83	W	79	N-O	M-M	2.8127	hydrogen,polar,
PDB_3SPI	A	A	HELIX2	HELIX2	L	83	W	79	CG-O	S-M	3.28185	weakhydrogen,weakpolar,
PDB_3SPI	A	A	HELIX2	HELIX2	L	83	Y	81	N-O	M-M	3.34794	polar,
PDB_3SPI	A	A	HELIX2	HELIX2	L	84	R	80	N-O	M-M	2.89626	hydrogen,polar,
PDB_3SPI	A	A	HELIX2	HELIX2	L	84	R	80	CB-O	S-M	3.08307	weakpolar,
PDB_3SPI	A	A	HELIX2	HELIX2	L	85	Y	81	CB-O	S-M	3.04344	weakhydrogen,weakpolar,
PDB_3SPI	A	A	HELIX2	HELIX2	L	85	Y	81	N-O	M-M	2.91386	hydrogen,polar,
PDB_3SPI	A	A	HELIX2	HELIX2	L	85	M	82	CB-O	S-M	3.26795	weakhydrogen,weakpolar,
PDB_3SPI	A	A	HELIX2	HELIX2	L	85	L	83	N-O	M-M	2.9652	polar,
PDB_3SPI	A	A	HELIX2	HELIX2	L	85	L	83	C-O	M-M	3.5123	carbonyl,
PDB_3SPI	A	A	HELIX2	HELIX2	F	86	M	82	CD1-O	S-M	2.96054	weakhydrogen,weakpolar,
PDB_3SPI	A	A	HELIX2	HELIX2	F	86	M	82	CE1-CG	S-S	4.0741	hydrophobic,
PDB_3SPI	A	A	HELIX2	HELIX2	F	86	M	82	N-O	M-M	3.16008	hydrogen,polar,
PDB_3SPI	A	A	HELIX2	HELIX2	F	86	L	83	CB-O	S-M	3.47866	weakpolar,
PDB_3SPI	A	A	HELIX2	HELIX2	F	86	L	83	N-O	M-M	2.71881	hydrogen,polar,
PDB_3SPI	A	A	HELIX2	HELIX2	F	86	L	83	CA-O	M-M	3.3604	weakpolar,
PDB_3SPI	A	A	HELIX2	HELIX2	F	86	L	83	C-O	M-M	3.56632	carbonyl,
PDB_3SPI	A	A	HELIX2	HELIX2	F	86	L	84	N-O	M-M	3.41658	polar,
PDB_3SPI	A	A	HELIX2	HELIX2	S	87	L	83	N-O	M-M	2.82451	hydrogen,polar,
PDB_3SPI	A	A	HELIX2	HELIX2	S	87	L	83	OG-O	S-M	2.65786	polar,
PDB_3SPI	A	A	HELIX2	HELIX2	S	87	L	84	N-O	M-M	3.42859	polar,
PDB_3SPI	A	A	HELIX2	HELIX2	S	87	L	84	OG-O	S-M	3.08145	hydrogen,polar,
PDB_3SPI	A	A	HELIX2	HELIX2	S	87	L	84	OG-CA	S-M	3.10923	weakpolar,
PDB_3SPI	A	A	HELIX2	HELIX2	L	88	L	84	N-O	M-M	2.7686	hydrogen,polar,
PDB_3SPI	A	A	HELIX2	HELIX2	L	88	L	84	CB-O	S-M	3.18948	weakpolar,
PDB_3SPI	A	A	HELIX2	HELIX2	L	88	L	85	N-O	M-M	3.17039	hydrogen,polar,
PDB_3SPI	A	A	HELIX2	HELIX2	L	88	L	85	CA-O	M-M	3.46093	weakpolar,
PDB_3SPI	A	A	HELIX2	HELIX2	L	88	L	85	CB-O	S-M	3.02348	weakhydrogen,weakpolar,
PDB_3SPI	A	A	HELIX2	HELIX2	L	88	F	86	N-O	M-M	3.2343	polar,
PDB_3SPI	A	A	HELIX2	HELIX2	A	89	L	85	N-O	M-M	3.09494	hydrogen,polar,
PDB_3SPI	A	A	HELIX2	HELIX2	A	89	F	86	CA-O	M-M	3.39202	weakpolar,
PDB_3SPI	A	A	HELIX2	HELIX2	A	89	F	86	CB-O	S-M	3.25528	weakhydrogen,weakpolar,
PDB_3SPI	A	A	HELIX2	HELIX2	A	89	F	86	N-O	M-M	2.88709	hydrogen,polar,
PDB_3SPI	A	A	HELIX2	HELIX2	A	89	S	87	N-O	M-M	3.46942	polar,
PDB_3SPI	A	A	HELIX2	HELIX2	F	90	F	86	CD2-O	S-M	3.13829	weakpolar,
PDB_3SPI	A	A	HELIX2	HELIX2	F	90	F	86	N-O	M-M	2.88999	hydrogen,polar,
PDB_3SPI	A	A	HELIX2	HELIX2	F	90	S	87	CB-O	S-M	3.59796	weakhydrogen,
PDB_3SPI	A	A	HELIX2	HELIX2	L	91	S	87	N-O	M-M	2.90152	hydrogen,polar,
PDB_3SPI	A	A	HELIX2	HELIX2	L	91	S	87	CB-O	S-M	3.23068	weakpolar,
PDB_3SPI	A	A	HELIX2	HELIX2	L	91	L	88	CB-O	S-M	3.69743	weakhydrogen,
PDB_3SPI	A	A	HELIX2	HELIX2	L	91	A	89	N-O	M-M	3.45943	polar,
PDB_3SPI	A	A	HELIX2	HELIX2	V	92	L	88	N-O	M-M	2.98605	hydrogen,polar,
PDB_3SPI	A	A	HELIX2	HELIX2	V	92	L	88	CB-O	S-M	3.34882	weakpolar,
PDB_3SPI	A	A	HELIX2	HELIX2	V	92	L	88	CG2-O	S-M	2.99232	weakhydrogen,weakpolar,
PDB_3SPI	A	A	HELIX2	HELIX2	V	92	A	89	N-O	M-M	3.10723	hydrogen,polar,
PDB_3SPI	A	A	HELIX2	HELIX2	V	92	A	89	CB-O	S-M	3.47316	weakhydrogen,weakpolar,
PDB_3SPI	A	A	HELIX2	HELIX2	V	92	F	90	N-O	M-M	2.99605	polar,
PDB_3SPI	A	A	HELIX2	HELIX2	S	93	A	89	OG-O	S-M	3.09851	polar,
PDB_3SPI	A	A	HELIX2	HELIX2	S	93	A	89	N-O	M-M	3.01206	hydrogen,polar,
PDB_3SPI	A	A	HELIX2	HELIX2	S	93	F	90	OG-O	S-M	2.66215	hydrogen,polar,
PDB_3SPI	A	A	HELIX2	HELIX2	S	93	F	90	N-O	M-M	2.90627	hydrogen,polar,
PDB_3SPI	A	A	HELIX2	HELIX2	W	94	F	90	N-O	M-M	2.93059	hydrogen,polar,
PDB_3SPI	A	A	HELIX2	HELIX2	W	94	F	90	CZ2-CB	S-S	3.98092	hydrophobic,
PDB_3SPI	A	A	HELIX2	HELIX2	W	94	F	90	CZ2-CB	S-S	3.98092	carbonpi
PDB_3SPI	A	A	HELIX2	HELIX2	W	94	F	90	CH2-CB	S-S	3.95127	hydrophobic,
PDB_3SPI	A	A	HELIX2	HELIX2	W	94	F	90	CH2-CB	S-S	3.95127	carbonpi
PDB_3SPI	A	A	HELIX2	HELIX2	W	94	L	91	N-O	M-M	3.4937	polar,
PDB_3SPI	A	A	HELIX2	HELIX2	W	94	L	91	CB-O	S-M	3.69085	weakhydrogen,
PDB_3SPI	A	A	HELIX2	HELIX2	W	94	L	91	CE3-N	S-M	3.97578	donorpi
PDB_3SPI	A	D	HELIX2	HELIX28	W	94	V	163	CZ3-CG1	S-S	3.72347	hydrophobic,
PDB_3SPI	A	D	HELIX2	HELIX28	W	94	I	167	CH2-CG1	S-S	4.12732	hydrophobic,
PDB_3SPI	A	A	HELIX2	HELIX2	L	95	L	91	N-O	M-M	3.03482	hydrogen,polar,
PDB_3SPI	A	A	HELIX2	HELIX2	L	95	L	91	CB-O	S-M	3.46134	weakpolar,
PDB_3SPI	A	A	HELIX2	HELIX2	L	95	L	91	CG-O	S-M	3.30481	weakhydrogen,weakpolar,
PDB_3SPI	A	A	HELIX2	HELIX2	L	95	L	91	CD1-CG	S-S	4.2115	hydrophobic,
PDB_3SPI	A	A	HELIX2	HELIX2	L	95	L	91	CD1-CD1	S-S	4.22103	hydrophobic,
PDB_3SPI	A	A	HELIX2	HELIX2	L	96	V	92	N-O	M-M	3.00716	hydrogen,polar,
PDB_3SPI	A	A	HELIX2	HELIX2	L	96	V	92	CB-O	S-M	3.28814	weakpolar,
PDB_3SPI	A	A	HELIX2	HELIX2	L	96	S	93	N-O	M-M	3.44442	polar,
PDB_3SPI	A	A	HELIX2	HELIX2	F	97	S	93	N-O	M-M	3.06075	hydrogen,polar,
PDB_3SPI	A	A	HELIX2	HELIX2	F	97	S	93	CD1-O	S-M	3.02951	weakhydrogen,weakpolar,
PDB_3SPI	A	A	HELIX2	HELIX2	G	98	W	94	N-O	M-M	2.85454	hydrogen,polar,
PDB_3SPI	A	A	HELIX2	HELIX2	G	98	W	94	CA-O	M-M	3.46125	weakpolar,
PDB_3SPI	A	A	HELIX2	HELIX2	G	98	L	95	N-O	M-M	3.38225	polar,
PDB_3SPI	A	A	HELIX2	HELIX2	G	98	L	96	N-O	M-M	3.47546	polar,
PDB_3SPI	A	A	HELIX2	HELIX2	L	99	L	95	N-O	M-M	2.97185	hydrogen,polar,
PDB_3SPI	A	A	HELIX2	HELIX2	L	99	L	95	CG-O	S-M	3.28137	weakhydrogen,weakpolar,
PDB_3SPI	A	A	HELIX2	HELIX2	L	99	L	96	N-O	M-M	3.18438	hydrogen,polar,
PDB_3SPI	A	A	HELIX2	HELIX2	L	99	L	96	CB-O	S-M	3.31812	weakhydrogen,weakpolar,
PDB_3SPI	A	A	HELIX2	HELIX2	L	99	F	97	N-O	M-M	3.09897	polar,
PDB_3SPI	A	A	HELIX2	HELIX2	I	100	L	96	CG1-O	S-M	3.2717	weakhydrogen,weakpolar,
PDB_3SPI	A	A	HELIX2	HELIX2	I	100	L	96	N-O	M-M	3.19042	hydrogen,polar,
PDB_3SPI	A	A	HELIX2	HELIX2	I	100	F	97	C-O	M-M	3.58128	carbonyl,
PDB_3SPI	A	A	HELIX2	HELIX2	I	100	F	97	CB-O	S-M	3.25962	weakhydrogen,weakpolar,
PDB_3SPI	A	A	HELIX2	HELIX2	I	100	F	97	CA-O	M-M	3.40324	weakpolar,
PDB_3SPI	A	A	HELIX2	HELIX2	I	100	F	97	N-O	M-M	2.89723	hydrogen,polar,
PDB_3SPI	A	A	HELIX2	HELIX2	F	101	F	97	CD1-CB	S-S	4.08895	hydrophobic,
PDB_3SPI	A	A	HELIX2	HELIX2	F	101	F	97	CE1-CB	S-S	3.7455	hydrophobic,
PDB_3SPI	A	A	HELIX2	HELIX2	F	101	F	97	N-O	M-M	2.80257	hydrogen,polar,
PDB_3SPI	A	A	HELIX2	HELIX2	F	101	F	97	CD1-O	S-M	2.95426	weakpolar,
PDB_3SPI	A	A	HELIX2	HELIX2	F	101	G	98	N-O	M-M	3.4273	polar,
PDB_3SPI	A	A	HELIX2	HELIX2	F	101	G	98	CB-O	S-M	3.71943	weakhydrogen,
PDB_3SPI	A	A	HELIX2	HELIX2	F	101	L	99	N-O	M-M	3.39822	polar,
PDB_3SPI	A	A	HELIX2	HELIX2	W	102	G	98	N-O	M-M	2.83422	hydrogen,polar,
PDB_3SPI	A	A	HELIX2	HELIX2	W	102	G	98	CB-O	S-M	3.28738	weakpolar,
PDB_3SPI	A	A	HELIX2	HELIX2	W	102	L	99	N-O	M-M	3.13677	hydrogen,polar,
PDB_3SPI	A	A	HELIX2	HELIX2	W	102	L	99	C-O	M-M	3.58268	carbonyl,
PDB_3SPI	A	A	HELIX2	HELIX2	W	102	L	99	CB-O	S-M	3.57713	weakhydrogen,
PDB_3SPI	A	A	HELIX2	HELIX2	W	102	I	100	N-O	M-M	3.30793	polar,
PDB_3SPI	A	A	HELIX2	HELIX2	L	103	L	99	N-O	M-M	2.68863	hydrogen,polar,
PDB_3SPI	A	A	HELIX2	HELIX2	L	103	L	99	CB-O	S-M	3.27432	weakpolar,
PDB_3SPI	A	A	HELIX2	HELIX2	L	103	L	99	CG-O	S-M	3.34405	weakpolar,
PDB_3SPI	A	A	HELIX2	HELIX2	L	103	I	100	N-O	M-M	3.11897	hydrogen,polar,
PDB_3SPI	A	A	HELIX2	HELIX2	L	103	I	100	CB-O	S-M	3.30303	weakhydrogen,weakpolar,
PDB_3SPI	A	A	HELIX2	HELIX2	L	103	F	101	N-O	M-M	3.49712	polar,
PDB_3SPI	A	A	HELIX2	HELIX2	I	104	I	100	CG1-CG2	S-S	4.17456	hydrophobic,
PDB_3SPI	A	A	HELIX2	HELIX2	I	104	I	100	CD1-CG2	S-S	3.69578	hydrophobic,
PDB_3SPI	A	A	HELIX2	HELIX2	I	104	I	100	N-O	M-M	2.79232	hydrogen,polar,
PDB_3SPI	A	A	HELIX2	HELIX2	I	104	I	100	CG1-O	S-M	2.89545	weakhydrogen,weakpolar,
PDB_3SPI	A	A	HELIX2	HELIX2	I	104	I	100	CD1-O	S-M	3.48386	weakpolar,
PDB_3SPI	A	A	HELIX2	HELIX2	I	104	F	101	N-O	M-M	3.22956	hydrogen,polar,
PDB_3SPI	A	A	HELIX2	HELIX2	I	104	F	101	CB-O	S-M	3.48694	weakhydrogen,weakpolar,
PDB_3SPI	A	A	HELIX2	HELIX2	I	104	W	102	N-O	M-M	3.42566	polar,
PDB_3SPI	A	A	HELIX2	HELIX2	A	105	F	101	N-O	M-M	2.77301	hydrogen,polar,
PDB_3SPI	A	A	HELIX2	HELIX2	A	105	F	101	CB-O	S-M	3.37436	weakpolar,
PDB_3SPI	A	A	HELIX2	HELIX2	A	105	W	102	N-O	M-M	3.26187	polar,
PDB_3SPI	A	A	HELIX2	HELIX2	A	105	W	102	CB-O	S-M	3.57606	weakhydrogen,
PDB_3SPI	A	A	HELIX2	HELIX2	A	105	L	103	N-O	M-M	3.49008	polar,
PDB_3SPI	A	A	HELIX2	HELIX2	L	106	W	102	CD2-CZ3	S-S	4.03574	hydrophobic,
PDB_3SPI	A	A	HELIX2	HELIX2	L	106	W	102	N-O	M-M	2.74424	hydrogen,polar,
PDB_3SPI	A	A	HELIX2	HELIX2	L	106	W	102	CB-O	S-M	3.29503	weakpolar,
PDB_3SPI	A	A	HELIX2	HELIX2	L	106	W	102	CB-O	S-M	3.29503	carbonpi
PDB_3SPI	A	A	HELIX2	HELIX2	L	106	W	102	CD1-CH2	S-S	4.09774	hydrophobic,
PDB_3SPI	A	A	HELIX2	HELIX2	L	106	W	102	CD2-CH2	S-S	3.96697	hydrophobic,
PDB_3SPI	A	A	HELIX2	HELIX2	L	106	W	102	CD1-CZ2	S-S	4.08987	hydrophobic,
PDB_3SPI	A	A	HELIX2	HELIX2	L	106	L	103	N-O	M-M	3.32681	polar,
PDB_3SPI	A	A	HELIX2	HELIX2	L	106	L	103	CB-O	S-M	3.49412	weakhydrogen,weakpolar,
PDB_3SPI	A	A	HELIX2	HELIX2	L	106	I	104	N-O	M-M	3.48991	polar,
PDB_3SPI	A	A	HELIX2	HELIX2	I	107	L	103	CD1-O	S-M	2.93705	weakhydrogen,weakpolar,
PDB_3SPI	A	A	HELIX2	HELIX2	I	107	L	103	N-O	M-M	2.99041	hydrogen,polar,
PDB_3SPI	A	A	HELIX2	HELIX2	H	108	I	104	N-O	M-M	2.9776	hydrogen,polar,
PDB_3SPI	A	A	HELIX2	HELIX2	H	108	I	104	CB-O	S-M	3.2095	weakpolar,
PDB_3SPI	A	A	HELIX2	HELIX2	H	108	L	106	N-O	M-M	3.45804	polar,
PDB_3SPI	A	A	HELIX2	HELIX2	G	109	A	105	N-O	M-M	3.0339	hydrogen,polar,
PDB_3SPI	A	A	HELIX2	HELIX2	G	109	L	106	N-O	M-M	3.04604	hydrogen,polar,
PDB_3SPI	A	A	HELIX2	HELIX2	G	109	L	106	CA-O	M-M	3.49003	weakpolar,
PDB_3SPI	A	A	HELIX2	HELIX2	G	109	I	107	N-O	M-M	3.08947	polar,
PDB_3SPI	A	A	LOOP3	HELIX2	D	110	A	105	OD2-CA	S-M	3.73768	weakhydrogen,
PDB_3SPI	A	A	LOOP3	HELIX2	D	110	A	105	N-O	M-M	2.7767	hydrogen,polar,
PDB_3SPI	A	A	LOOP3	HELIX2	D	110	A	105	CB-CB	S-S	4.01338	hydrophobic,
PDB_3SPI	A	A	LOOP3	HELIX2	D	110	H	108	OD2-ND1	S-S	3.68203	ionic,
PDB_3SPI	A	A	LOOP3	HELIX2	D	110	H	108	OD1-ND1	S-S	2.61322	hydrogen,ionic,polar,
PDB_3SPI	A	A	LOOP3	HELIX2	D	110	H	108	OD1-CE1	S-S	3.65083	ionic,
PDB_3SPI	A	A	LOOP3	HELIX2	D	110	H	108	OD1-CB	S-S	3.51965	weakhydrogen,
PDB_3SPI	A	A	LOOP3	HELIX2	D	110	H	108	OD1-CG	S-S	3.45057	ionic,
PDB_3SPI	A	A	LOOP3	HELIX2	L	111	W	102	CD1-CZ2	S-S	4.09723	hydrophobic,
PDB_3SPI	A	A	LOOP3	HELIX2	L	111	A	105	N-O	M-M	3.63901	hydrogen,
PDB_3SPI	A	A	LOOP3	HELIX2	L	111	A	105	CD2-CB	S-S	3.95828	hydrophobic,
PDB_3SPI	A	A	LOOP3	HELIX2	L	111	L	106	CD1-CB	S-S	3.97431	hydrophobic,
PDB_3SPI	A	A	LOOP3	HELIX2	L	111	L	106	CD1-CD1	S-S	3.38374	hydrophobic,
PDB_3SPI	A	A	LOOP3	HELIX2	E	112	G	109	N-O	M-M	3.53824	hydrogen,
PDB_3SPI	A	A	LOOP3	LOOP3	E	112	D	110	N-O	M-M	2.96134	polar,
PDB_3SPI	A	A	LOOP3	LOOP3	N	113	D	110	N-O	M-M	2.75101	hydrogen,polar,
PDB_3SPI	A	A	LOOP3	LOOP3	N	113	D	110	C-O	M-M	3.05189	carbonyl,
PDB_3SPI	A	A	LOOP3	LOOP3	N	113	D	110	CA-O	M-M	3.42142	weakpolar,
PDB_3SPI	A	A	LOOP3	LOOP3	P	114	D	110	CA-O	M-M	3.32984	weakpolar,
PDB_3SPI	A	A	LOOP3	LOOP3	P	114	D	110	CD-O	S-M	3.45457	weakpolar,
PDB_3SPI	A	A	LOOP3	LOOP3	G	115	N	113	N-O	M-M	3.14434	polar,
PDB_3SPI	A	A	LOOP3	LOOP3	G	116	N	113	N-O	M-M	3.23174	hydrogen,polar,
PDB_3SPI	A	A	LOOP3	LOOP3	G	116	N	113	N-OD1	M-S	3.48016	hydrogen,polar,
PDB_3SPI	A	A	LOOP3	LOOP3	D	117	N	113	OD2-ND2	S-S	3.58229	hydrogen,
PDB_3SPI	A	A	LOOP3	LOOP3	T	119	D	117	CA-OD1	M-S	3.3683	weakpolar,
PDB_3SPI	A	A	LOOP3	LOOP3	T	119	D	117	N-OD1	M-S	2.79111	hydrogen,polar,
PDB_3SPI	A	A	LOOP3	LOOP3	T	119	D	117	OG1-OD1	S-S	2.83668	hydrogen,polar,
PDB_3SPI	A	A	LOOP3	LOOP3	T	119	D	117	N-O	M-M	3.12891	polar,
PDB_3SPI	A	A	LOOP3	HELIX2	F	120	H	108	CZ-ND1	S-S	3.62454	pi-pi,
PDB_3SPI	A	A	LOOP3	HELIX2	F	120	H	108	CE1-CE1	S-S	3.87541	pi-pi,
PDB_3SPI	A	A	LOOP3	HELIX2	F	120	H	108	CZ-CE1	S-S	3.75593	pi-pi,
PDB_3SPI	A	A	LOOP3	LOOP3	F	120	D	110	CZ-OD1	S-S	3.54237	weakhydrogen,
PDB_3SPI	A	A	LOOP3	LOOP3	F	120	N	113	CE2-CB	S-S	3.92471	hydrophobic,
PDB_3SPI	A	A	LOOP3	LOOP3	F	120	N	113	CD2-CB	S-S	4.01714	hydrophobic,
PDB_3SPI	A	A	LOOP3	LOOP3	F	120	G	116	O-CA	M-M	3.13951	weakpolar,
PDB_3SPI	A	A	LOOP3	LOOP3	F	120	G	116	O-C	M-M	3.377	carbonyl,
PDB_3SPI	A	A	LOOP3	LOOP3	F	120	D	117	N-OD1	M-S	2.80939	hydrogen,polar,
PDB_3SPI	A	A	LOOP3	LOOP3	F	120	D	117	N-O	M-M	3.13196	hydrogen,polar,
PDB_3SPI	A	A	LOOP3	LOOP3	F	120	D	117	C-O	M-M	3.55555	carbonyl,
PDB_3SPI	A	A	LOOP3	LOOP3	F	120	D	117	O-N	M-M	2.69486	hydrogen,polar,
PDB_3SPI	A	A	LOOP3	LOOP3	P	122	D	110	CA-OD1	M-S	3.49091	weakhydrogen,weakpolar,
PDB_3SPI	A	A	LOOP3	LOOP3	P	122	D	110	CB-CB	S-S	4.22184	hydrophobic,
PDB_3SPI	A	A	LOOP3	LOOP3	P	122	N	113	CG-O	S-M	3.42369	weakhydrogen,weakpolar,
PDB_3SPI	A	A	LOOP3	LOOP3	P	122	P	114	CG-O	S-M	3.33009	weakhydrogen,weakpolar,
PDB_3SPI	A	A	LOOP3	HELIX2	C	123	I	104	CB-CG2	S-S	4.08408	hydrophobic,
PDB_3SPI	A	A	LOOP3	HELIX2	C	123	H	108	SG-CD2	S-S	3.41014	donorpi
PDB_3SPI	A	A	LOOP3	HELIX2	C	123	H	108	SG-NE2	S-S	3.8929	donorpi
PDB_3SPI	A	A	LOOP3	HELIX2	C	123	H	108	SG-ND1	S-S	3.67435	donorpi
PDB_3SPI	A	A	LOOP3	HELIX2	C	123	H	108	SG-CE1	S-S	4.03302	donorpi
PDB_3SPI	A	A	LOOP3	HELIX2	C	123	H	108	SG-CB	S-S	3.56907	donorpi
PDB_3SPI	A	A	LOOP3	HELIX2	C	123	H	108	SG-CG	S-S	3.2549	donorpi
PDB_3SPI	A	A	LOOP3	LOOP3	C	123	D	110	N-OD2	M-S	2.90878	hydrogen,polar,
PDB_3SPI	A	A	LOOP3	LOOP3	C	123	D	110	CB-OD2	S-S	3.37752	weakpolar,
PDB_3SPI	A	A	LOOP3	LOOP3	L	125	P	114	CA-O	M-M	3.61266	weakhydrogen,
PDB_3SPI	A	A	LOOP3	LOOP3	L	125	P	122	CD2-CG	S-S	4.12508	hydrophobic,
PDB_3SPI	A	A	LOOP3	LOOP3	Q	126	P	114	N-O	M-M	2.92508	hydrogen,polar,
PDB_3SPI	A	A	LOOP3	HELIX2	V	127	A	105	CG1-CB	S-S	3.90122	hydrophobic,
PDB_3SPI	A	A	LOOP3	LOOP3	V	127	L	111	O-CD2	M-S	3.60767	weakhydrogen,
PDB_3SPI	A	A	LOOP3	LOOP3	V	127	V	124	CG2-CG1	S-S	3.96101	hydrophobic,
PDB_3SPI	A	A	LOOP3	LOOP3	V	127	L	125	N-O	M-M	3.28863	polar,
PDB_3SPI	A	A	LOOP3	LOOP3	N	128	L	111	O-CD2	M-S	3.68909	weakhydrogen,
PDB_3SPI	A	A	LOOP3	LOOP3	N	128	P	114	CB-CG	S-S	3.98082	hydrophobic,
PDB_3SPI	A	D	LOOP3	LOOP4	N	128	E	153	ND2-OE2	S-S	3.41899	hydrogen,polar,
PDB_3SPI	A	A	HELIX3	HELIX2	F	130	W	102	CD1-NE1	S-S	3.92068	pi-pi,
PDB_3SPI	A	A	HELIX3	HELIX2	F	130	W	102	CG-NE1	S-S	3.9181	pi-pi,
PDB_3SPI	A	A	HELIX3	HELIX2	F	130	W	102	CD1-CE2	S-S	3.88309	pi-pi,
PDB_3SPI	A	A	HELIX3	HELIX2	F	130	W	102	CE1-CE2	S-S	3.67904	pi-pi,
PDB_3SPI	A	A	HELIX3	HELIX2	F	130	W	102	CZ-CE2	S-S	3.95386	pi-pi,
PDB_3SPI	A	A	HELIX3	HELIX2	F	130	W	102	CE1-CH2	S-S	3.95086	hydrophobic,pi-pi,
PDB_3SPI	A	A	HELIX3	HELIX2	F	130	W	102	CE1-CZ2	S-S	3.50718	hydrophobic,pi-pi,
PDB_3SPI	A	A	HELIX3	HELIX2	F	130	W	102	CZ-CZ2	S-S	3.51228	hydrophobic,pi-pi,
PDB_3SPI	A	D	HELIX3	LOOP4	V	131	E	153	CB-CB	S-S	3.98207	hydrophobic,
PDB_3SPI	A	D	HELIX3	LOOP4	V	131	E	153	CG1-CB	S-S	3.68026	hydrophobic,
PDB_3SPI	A	A	HELIX3	LOOP3	A	132	V	127	CB-CG1	S-S	4.19409	hydrophobic,
PDB_3SPI	A	A	HELIX3	LOOP3	A	132	N	128	CB-OD1	S-S	3.29483	weakpolar,
PDB_3SPI	A	A	HELIX3	HELIX3	A	132	F	130	N-O	M-M	3.24609	polar,
PDB_3SPI	A	D	HELIX3	LOOP4	A	132	E	153	CB-CG	S-S	4.1023	hydrophobic,
PDB_3SPI	A	A	HELIX3	HELIX2	A	133	G	98	O-CA	M-M	3.60335	weakhydrogen,
PDB_3SPI	A	A	HELIX3	HELIX2	A	133	G	98	CB-O	S-M	3.35596	weakhydrogen,weakpolar,
PDB_3SPI	A	A	HELIX3	HELIX2	A	133	W	102	CB-CB	S-S	3.42321	hydrophobic,
PDB_3SPI	A	A	HELIX3	LOOP3	A	133	V	127	CB-CG1	S-S	3.84353	hydrophobic,
PDB_3SPI	A	A	HELIX3	HELIX3	A	133	G	129	N-O	M-M	3.0602	hydrogen,polar,
PDB_3SPI	A	A	HELIX3	HELIX3	A	133	G	129	CB-O	S-M	3.38732	weakpolar,
PDB_3SPI	A	A	HELIX3	HELIX3	A	133	F	130	CA-O	M-M	3.44732	weakpolar,
PDB_3SPI	A	A	HELIX3	HELIX3	A	133	F	130	C-O	M-M	3.54059	carbonyl,
PDB_3SPI	A	A	HELIX3	HELIX3	A	133	F	130	N-O	M-M	2.9813	hydrogen,polar,
PDB_3SPI	A	A	HELIX3	HELIX3	A	133	F	130	CB-O	S-M	3.38078	weakhydrogen,weakpolar,
PDB_3SPI	A	A	HELIX3	HELIX2	F	134	W	94	CE1-CB	S-S	3.62921	hydrophobic,
PDB_3SPI	A	A	HELIX3	HELIX2	F	134	L	95	CE1-CG	S-S	4.03646	hydrophobic,
PDB_3SPI	A	A	HELIX3	HELIX2	F	134	L	95	CD1-CD2	S-S	3.75244	hydrophobic,
PDB_3SPI	A	A	HELIX3	HELIX2	F	134	L	95	CE1-CD2	S-S	3.45883	hydrophobic,
PDB_3SPI	A	A	HELIX3	HELIX2	F	134	L	95	CZ-CD2	S-S	4.05241	hydrophobic,
PDB_3SPI	A	A	HELIX3	HELIX3	F	134	F	130	N-O	M-M	2.77225	hydrogen,polar,
PDB_3SPI	A	A	HELIX3	HELIX3	F	134	V	131	CB-O	S-M	3.3315	weakhydrogen,weakpolar,
PDB_3SPI	A	A	HELIX3	HELIX3	F	134	V	131	N-O	M-M	3.20219	hydrogen,polar,
PDB_3SPI	A	A	HELIX3	HELIX3	F	134	A	132	N-O	M-M	3.36794	polar,
PDB_3SPI	A	A	HELIX3	HELIX3	L	135	V	131	N-O	M-M	2.82113	hydrogen,polar,
PDB_3SPI	A	A	HELIX3	HELIX3	L	135	V	131	CG-O	S-M	3.18614	weakhydrogen,weakpolar,
PDB_3SPI	A	A	HELIX3	HELIX3	L	135	V	131	CD1-CG1	S-S	4.10127	hydrophobic,
PDB_3SPI	A	A	HELIX3	HELIX3	L	135	A	132	N-O	M-M	3.38025	polar,
PDB_3SPI	A	A	HELIX3	HELIX3	L	135	A	132	CB-O	S-M	3.70821	weakhydrogen,
PDB_3SPI	A	D	HELIX3	LOOP4	L	135	V	151	CD2-CG1	S-S	4.03633	hydrophobic,
PDB_3SPI	A	D	HELIX3	LOOP4	L	135	E	153	CD1-CB	S-S	4.19988	hydrophobic,
PDB_3SPI	A	D	HELIX3	LOOP4	L	135	E	153	CD1-CG	S-S	4.05869	hydrophobic,
PDB_3SPI	A	D	HELIX3	HELIX28	L	135	V	159	CD2-CG1	S-S	4.2312	hydrophobic,
PDB_3SPI	A	D	HELIX3	HELIX28	L	135	V	159	CD2-CG2	S-S	3.83349	hydrophobic,
PDB_3SPI	A	A	HELIX3	HELIX2	F	136	F	101	CE2-CE2	S-S	3.65242	hydrophobic,pi-pi,
PDB_3SPI	A	A	HELIX3	HELIX2	F	136	F	101	CE2-CZ	S-S	3.85151	hydrophobic,pi-pi,
PDB_3SPI	A	A	HELIX3	HELIX2	F	136	F	101	CE2-CD2	S-S	3.82346	hydrophobic,pi-pi,
PDB_3SPI	A	A	HELIX3	LOOP3	F	136	V	124	CG-CG1	S-S	4.02811	hydrophobic,
PDB_3SPI	A	A	HELIX3	LOOP3	F	136	V	124	CG-CG1	S-S	4.02811	carbonpi
PDB_3SPI	A	A	HELIX3	LOOP3	F	136	V	124	CD1-CG1	S-S	3.86995	hydrophobic,
PDB_3SPI	A	A	HELIX3	LOOP3	F	136	V	124	CD1-CG1	S-S	3.86995	carbonpi
PDB_3SPI	A	A	HELIX3	LOOP3	F	136	V	124	CD2-CG1	S-S	4.02185	hydrophobic,
PDB_3SPI	A	A	HELIX3	LOOP3	F	136	V	124	CD2-CG1	S-S	4.02185	carbonpi
PDB_3SPI	A	A	HELIX3	LOOP3	F	136	V	124	CE1-CG1	S-S	3.70259	hydrophobic,
PDB_3SPI	A	A	HELIX3	LOOP3	F	136	V	124	CE1-CG1	S-S	3.70259	carbonpi
PDB_3SPI	A	A	HELIX3	LOOP3	F	136	V	124	CE2-CG1	S-S	3.86242	hydrophobic,
PDB_3SPI	A	A	HELIX3	LOOP3	F	136	V	124	CE2-CG1	S-S	3.86242	carbonpi
PDB_3SPI	A	A	HELIX3	LOOP3	F	136	V	124	CZ-CG1	S-S	3.69994	hydrophobic,
PDB_3SPI	A	A	HELIX3	LOOP3	F	136	V	124	CZ-CG1	S-S	3.69994	carbonpi
PDB_3SPI	A	A	HELIX3	LOOP3	F	136	V	124	CE2-CG2	S-S	3.99972	hydrophobic,
PDB_3SPI	A	A	HELIX3	HELIX3	F	136	A	132	N-O	M-M	3.08678	hydrogen,polar,
PDB_3SPI	A	A	HELIX3	HELIX3	F	136	F	134	N-O	M-M	3.27379	polar,
PDB_3SPI	A	C	HELIX3	LOOP4	F	136	Y	146	CE1-CZ	S-S	3.79607	pi-pi,
PDB_3SPI	A	C	HELIX3	LOOP4	F	136	Y	146	CE1-OH	S-S	3.46856	weakpolar,
PDB_3SPI	A	C	HELIX3	LOOP4	F	136	Y	146	CE1-CE2	S-S	3.75395	hydrophobic,pi-pi,
PDB_3SPI	A	A	HELIX3	HELIX2	S	137	W	94	OG-CA	S-M	3.41093	weakhydrogen,weakpolar,
PDB_3SPI	A	A	HELIX3	HELIX2	S	137	W	94	CB-O	S-M	3.35807	weakpolar,
PDB_3SPI	A	A	HELIX3	HELIX2	S	137	W	94	OG-O	S-M	2.72872	polar,
PDB_3SPI	A	A	HELIX3	HELIX2	S	137	F	97	OG-CB	S-S	3.40715	weakhydrogen,weakpolar,
PDB_3SPI	A	A	HELIX3	HELIX2	S	137	G	98	OG-N	S-M	3.40602	polar,
PDB_3SPI	A	A	HELIX3	HELIX3	S	137	A	133	N-O	M-M	3.15483	hydrogen,polar,
PDB_3SPI	A	A	HELIX3	HELIX3	S	137	F	134	N-O	M-M	3.00478	hydrogen,polar,
PDB_3SPI	A	A	HELIX3	HELIX3	S	137	F	134	CA-O	M-M	3.488	weakpolar,
PDB_3SPI	A	A	HELIX3	HELIX3	S	137	F	134	CB-O	S-M	3.27002	weakhydrogen,weakpolar,
PDB_3SPI	A	A	HELIX3	HELIX3	S	137	L	135	N-O	M-M	3.35771	polar,
PDB_3SPI	A	A	HELIX3	HELIX2	I	138	W	94	CG1-CB	S-S	4.05888	hydrophobic,
PDB_3SPI	A	A	HELIX3	HELIX2	I	138	W	94	CG1-CB	S-S	4.05888	carbonpi
PDB_3SPI	A	A	HELIX3	HELIX2	I	138	W	94	CA-CD1	M-S	4.02772	carbonpi
PDB_3SPI	A	A	HELIX3	HELIX2	I	138	W	94	CG2-CE2	S-S	4.04267	carbonpi
PDB_3SPI	A	A	HELIX3	HELIX2	I	138	W	94	CG2-CE2	S-S	4.04267	carbonpi
PDB_3SPI	A	A	HELIX3	HELIX2	I	138	W	94	CG1-CG	S-S	3.88861	hydrophobic,
PDB_3SPI	A	A	HELIX3	HELIX2	I	138	W	94	CG1-CG	S-S	3.88861	carbonpi
PDB_3SPI	A	A	HELIX3	HELIX2	I	138	W	94	CG1-CD2	S-S	3.97218	hydrophobic,
PDB_3SPI	A	A	HELIX3	HELIX2	I	138	W	94	CG1-CD2	S-S	3.97218	carbonpi
PDB_3SPI	A	A	HELIX3	HELIX3	I	138	F	134	N-O	M-M	3.04005	hydrogen,polar,
PDB_3SPI	A	A	HELIX3	HELIX3	I	138	F	134	CG1-O	S-M	3.27879	weakhydrogen,weakpolar,
PDB_3SPI	A	A	HELIX3	HELIX3	I	138	F	134	CG1-O	S-M	3.27879	carbonpi
PDB_3SPI	A	A	HELIX3	HELIX3	I	138	F	134	CD1-CD2	S-S	4.00402	hydrophobic,
PDB_3SPI	A	A	HELIX3	HELIX3	I	138	F	134	CD1-CD2	S-S	4.00402	carbonpi
PDB_3SPI	A	A	HELIX3	HELIX3	I	138	F	134	CG1-CE1	S-S	4.09869	hydrophobic,
PDB_3SPI	A	A	HELIX3	HELIX3	I	138	F	134	CG1-CE1	S-S	4.09869	carbonpi
PDB_3SPI	A	A	HELIX3	HELIX3	I	138	F	134	CD1-CE1	S-S	3.96184	hydrophobic,
PDB_3SPI	A	A	HELIX3	HELIX3	I	138	F	134	CD1-CE1	S-S	3.96184	carbonpi
PDB_3SPI	A	A	HELIX3	HELIX3	I	138	F	134	CD1-CE2	S-S	3.54913	hydrophobic,
PDB_3SPI	A	A	HELIX3	HELIX3	I	138	F	134	CD1-CE2	S-S	3.54913	carbonpi
PDB_3SPI	A	A	HELIX3	HELIX3	I	138	F	134	CD1-CZ	S-S	3.5267	hydrophobic,
PDB_3SPI	A	A	HELIX3	HELIX3	I	138	F	134	CD1-CZ	S-S	3.5267	carbonpi
PDB_3SPI	A	A	HELIX3	HELIX3	I	138	L	135	N-O	M-M	3.19958	hydrogen,polar,
PDB_3SPI	A	A	HELIX3	HELIX3	I	138	L	135	CB-O	S-M	3.54133	weakhydrogen,
PDB_3SPI	A	A	HELIX3	HELIX3	I	138	F	136	N-O	M-M	3.44024	polar,
PDB_3SPI	A	D	HELIX3	HELIX28	I	138	V	163	CD1-CG2	S-S	3.92773	hydrophobic,
PDB_3SPI	A	A	HELIX3	HELIX3	E	139	L	135	N-O	M-M	2.85093	hydrogen,polar,
PDB_3SPI	A	A	HELIX3	HELIX3	E	139	L	135	CG-O	S-M	3.06538	weakhydrogen,weakpolar,
PDB_3SPI	A	A	HELIX3	HELIX3	E	139	F	136	N-O	M-M	3.41631	polar,
PDB_3SPI	A	A	HELIX3	HELIX3	T	140	F	136	N-O	M-M	2.98338	hydrogen,polar,
PDB_3SPI	A	A	HELIX3	HELIX3	T	140	F	136	CB-O	S-M	3.37322	weakpolar,
PDB_3SPI	A	A	HELIX3	HELIX3	T	140	F	136	OG1-O	S-M	2.85229	polar,
PDB_3SPI	A	A	HELIX3	HELIX3	T	140	F	136	OG1-O	S-M	2.85229	donorpi
PDB_3SPI	A	A	HELIX3	HELIX3	T	140	F	136	OG1-CD1	S-S	3.93717	donorpi
PDB_3SPI	A	A	HELIX3	HELIX3	T	140	F	136	OG1-CE1	S-S	3.60809	donorpi
PDB_3SPI	A	A	HELIX3	HELIX3	T	140	F	136	OG1-CE2	S-S	3.74876	donorpi
PDB_3SPI	A	A	HELIX3	HELIX3	T	140	F	136	OG1-CZ	S-S	3.50452	donorpi
PDB_3SPI	A	A	HELIX3	HELIX3	T	140	F	136	OG1-C	S-M	3.95622	donorpi
PDB_3SPI	A	A	HELIX3	HELIX3	T	140	S	137	N-O	M-M	3.3941	hydrogen,polar,
PDB_3SPI	A	A	HELIX3	HELIX3	T	140	S	137	CB-O	S-M	3.63934	weakhydrogen,
PDB_3SPI	A	A	HELIX3	HELIX3	T	140	I	138	N-O	M-M	3.03859	polar,
PDB_3SPI	A	C	HELIX3	LOOP4	T	140	I	144	CG2-CD1	S-S	4.15005	hydrophobic,
PDB_3SPI	A	C	HELIX3	LOOP4	T	140	Y	146	OG1-OH	S-S	2.70181	hydrogen,polar,
PDB_3SPI	A	A	HELIX3	HELIX2	Q	141	S	93	NE2-OG	S-S	3.00471	hydrogen,polar,
PDB_3SPI	A	A	HELIX3	HELIX3	Q	141	S	137	N-O	M-M	3.0552	hydrogen,polar,
PDB_3SPI	A	A	HELIX3	HELIX3	Q	141	I	138	N-O	M-M	3.15777	hydrogen,polar,
PDB_3SPI	A	A	HELIX3	HELIX2	T	142	W	94	CG2-CZ2	S-S	3.76825	hydrophobic,
PDB_3SPI	A	A	HELIX3	HELIX3	T	142	I	138	N-O	M-M	2.84616	hydrogen,polar,
PDB_3SPI	A	A	HELIX3	HELIX3	T	142	I	138	CB-O	S-M	3.26885	weakpolar,
PDB_3SPI	A	A	HELIX3	HELIX3	T	142	I	138	OG1-O	S-M	2.59999	hydrogen,polar,
PDB_3SPI	A	A	HELIX3	HELIX3	T	142	I	138	CG2-O	S-M	3.18602	weakpolar,
PDB_3SPI	A	A	HELIX3	HELIX3	T	142	I	138	CG2-CG2	S-S	3.70638	hydrophobic,
PDB_3SPI	A	A	HELIX3	HELIX3	T	142	E	139	OG1-O	S-M	3.34757	polar,
PDB_3SPI	A	A	HELIX3	HELIX3	T	142	T	140	N-O	M-M	3.40855	polar,
PDB_3SPI	A	D	HELIX3	LOOP4	T	142	T	143	O-CB	M-S	3.48919	weakpolar,
PDB_3SPI	A	D	HELIX3	LOOP4	T	142	T	143	O-CG2	M-S	3.30282	weakpolar,
PDB_3SPI	A	A	LOOP4	HELIX3	T	143	E	139	N-O	M-M	3.18305	hydrogen,polar,
PDB_3SPI	A	A	LOOP4	HELIX3	T	143	E	139	CA-O	M-M	3.49595	weakpolar,
PDB_3SPI	A	A	LOOP4	HELIX3	T	143	T	140	N-O	M-M	3.2023	hydrogen,polar,
PDB_3SPI	A	B	LOOP4		T	143	K	503	O-K	M-L	2.54764	metal,
PDB_3SPI	A	B	LOOP4		T	143	K	504	OG1-K	S-L	2.77205	metal,
PDB_3SPI	A	B	LOOP4		T	143	K	504	O-K	M-L	2.71795	metal,
PDB_3SPI	A	C	LOOP4	HELIX19	T	143	T	142	CB-O	S-M	3.48919	weakpolar,
PDB_3SPI	A	C	LOOP4	HELIX19	T	143	T	142	CG2-O	S-M	3.30282	weakpolar,
PDB_3SPI	A	C	LOOP4	LOOP4	T	143	I	144	CG2-CG1	S-S	3.96058	hydrophobic,
PDB_3SPI	A	C	LOOP4	LOOP4	T	143	I	144	O-CA	M-M	3.38384	weakhydrogen,weakpolar,
PDB_3SPI	A	C	LOOP4		T	143	K	503	O-K	M-L	2.54764	metal,
PDB_3SPI	A	C	LOOP4		T	143	K	504	OG1-K	S-L	2.77205	metal,
PDB_3SPI	A	C	LOOP4		T	143	K	504	O-K	M-L	2.71795	metal,
PDB_3SPI	A	D	LOOP4		T	143	K	503	O-K	M-L	2.54764	metal,
PDB_3SPI	A	D	LOOP4		T	143	K	504	OG1-K	S-L	2.77205	metal,
PDB_3SPI	A	D	LOOP4		T	143	K	504	O-K	M-L	2.71795	metal,
PDB_3SPI	A	A	LOOP4	HELIX3	I	144	E	139	N-O	M-M	3.16148	polar,
PDB_3SPI	A	A	LOOP4	HELIX3	I	144	T	142	N-O	M-M	3.33142	polar,
PDB_3SPI	A	A	LOOP4	HELIX3	I	144	T	142	N-OG1	M-S	3.43131	polar,
PDB_3SPI	A	A	LOOP4	HELIX3	I	144	T	142	CG1-OG1	S-S	3.01308	weakhydrogen,weakpolar,
PDB_3SPI	A	A	LOOP4	HELIX3	I	144	T	142	CD1-OG1	S-S	3.42301	weakpolar,
PDB_3SPI	A	B	LOOP4		I	144	K	502	O-K	M-L	2.63167	metal,
PDB_3SPI	A	B	LOOP4		I	144	K	503	O-K	M-L	2.63452	metal,
PDB_3SPI	A	C	LOOP4		I	144	K	502	O-K	M-L	2.63167	metal,
PDB_3SPI	A	C	LOOP4		I	144	K	503	O-K	M-L	2.63452	metal,
PDB_3SPI	A	D	LOOP4	HELIX27	I	144	T	140	CD1-CG2	S-S	4.15005	hydrophobic,
PDB_3SPI	A	D	LOOP4	LOOP4	I	144	T	143	CA-O	M-M	3.38384	weakhydrogen,weakpolar,
PDB_3SPI	A	D	LOOP4	LOOP4	I	144	T	143	CG1-CG2	S-S	3.96058	hydrophobic,
PDB_3SPI	A	D	LOOP4	LOOP4	I	144	G	145	O-CA	M-M	3.44996	weakhydrogen,weakpolar,
PDB_3SPI	A	D	LOOP4		I	144	K	502	O-K	M-L	2.63167	metal,
PDB_3SPI	A	D	LOOP4		I	144	K	503	O-K	M-L	2.63452	metal,
PDB_3SPI	A	A	LOOP4	HELIX3	G	145	E	139	N-O	M-M	3.2844	polar,
PDB_3SPI	A	B	LOOP4		G	145	K	501	O-K	M-L	2.62861	metal,
PDB_3SPI	A	B	LOOP4		G	145	K	502	O-K	M-L	2.65076	metal,
PDB_3SPI	A	C	LOOP4	LOOP4	G	145	I	144	CA-O	M-M	3.44996	weakhydrogen,weakpolar,
PDB_3SPI	A	C	LOOP4	LOOP4	G	145	Y	146	O-CA	M-M	3.24219	weakhydrogen,weakpolar,
PDB_3SPI	A	C	LOOP4		G	145	K	501	O-K	M-L	2.62861	metal,
PDB_3SPI	A	C	LOOP4		G	145	K	502	O-K	M-L	2.65076	metal,
PDB_3SPI	A	D	LOOP4		G	145	K	501	O-K	M-L	2.62861	metal,
PDB_3SPI	A	D	LOOP4		G	145	K	502	O-K	M-L	2.65076	metal,
PDB_3SPI	A	A	LOOP4	HELIX3	Y	146	E	139	CD1-CG	S-S	3.85103	hydrophobic,
PDB_3SPI	A	A	LOOP4	HELIX3	Y	146	E	139	CD1-OE2	S-S	3.4922	weakhydrogen,weakpolar,
PDB_3SPI	A	A	LOOP4	LOOP4	Y	146	I	144	N-O	M-M	3.47057	polar,
PDB_3SPI	A	A	LOOP4	LOOP4	Y	146	I	144	CZ-CG2	S-S	3.56702	carbonpi
PDB_3SPI	A	A	LOOP4	LOOP4	Y	146	I	144	OH-CG2	S-S	3.98442	carbonpi
PDB_3SPI	A	A	LOOP4	LOOP4	Y	146	I	144	CD2-CG2	S-S	3.97338	hydrophobic,
PDB_3SPI	A	A	LOOP4	LOOP4	Y	146	I	144	CD2-CG2	S-S	3.97338	carbonpi
PDB_3SPI	A	A	LOOP4	LOOP4	Y	146	I	144	CE1-CG2	S-S	3.83879	hydrophobic,
PDB_3SPI	A	A	LOOP4	LOOP4	Y	146	I	144	CE1-CG2	S-S	3.83879	carbonpi
PDB_3SPI	A	A	LOOP4	LOOP4	Y	146	I	144	CE2-CG2	S-S	3.64067	hydrophobic,
PDB_3SPI	A	A	LOOP4	LOOP4	Y	146	I	144	CE2-CG2	S-S	3.64067	carbonpi
PDB_3SPI	A	B	LOOP4		Y	146	K	501	O-K	M-L	2.69539	metal,
PDB_3SPI	A	C	LOOP4		Y	146	K	501	O-K	M-L	2.69539	metal,
PDB_3SPI	A	D	LOOP4	HELIX27	Y	146	F	136	CZ-CE1	S-S	3.79607	pi-pi,
PDB_3SPI	A	D	LOOP4	HELIX27	Y	146	F	136	OH-CE1	S-S	3.46856	weakpolar,
PDB_3SPI	A	D	LOOP4	HELIX27	Y	146	F	136	CE2-CE1	S-S	3.75395	hydrophobic,pi-pi,
PDB_3SPI	A	D	LOOP4	HELIX27	Y	146	T	140	OH-OG1	S-S	2.70181	polar,
PDB_3SPI	A	D	LOOP4	LOOP4	Y	146	G	145	CA-O	M-M	3.24219	weakhydrogen,weakpolar,
PDB_3SPI	A	D	LOOP4	LOOP4	Y	146	G	147	O-CA	M-M	3.02795	weakhydrogen,weakpolar,
PDB_3SPI	A	D	LOOP4		Y	146	K	501	O-K	M-L	2.69539	metal,
PDB_3SPI	A	A	LOOP4	LOOP4	G	147	G	145	N-O	M-M	3.00619	polar,
PDB_3SPI	A	C	LOOP4	LOOP4	G	147	Y	146	CA-O	M-M	3.02795	weakhydrogen,weakpolar,
PDB_3SPI	A	A	LOOP4	LOOP3	F	148	Q	126	O-CB	M-S	3.56874	carbonpi
PDB_3SPI	A	A	LOOP4	LOOP3	F	148	Q	126	CE2-CB	S-S	4.11606	hydrophobic,
PDB_3SPI	A	A	LOOP4	LOOP3	F	148	Q	126	CE2-CB	S-S	4.11606	carbonpi
PDB_3SPI	A	A	LOOP4	LOOP3	F	148	Q	126	O-CG	M-S	3.42628	weakpolar,
PDB_3SPI	A	A	LOOP4	LOOP3	F	148	Q	126	O-CG	M-S	3.42628	carbonpi
PDB_3SPI	A	A	LOOP4	LOOP3	F	148	Q	126	CE2-CG	S-S	4.01297	hydrophobic,
PDB_3SPI	A	A	LOOP4	LOOP3	F	148	Q	126	CE2-CG	S-S	4.01297	carbonpi
PDB_3SPI	A	A	LOOP4	LOOP3	F	148	Q	126	CE1-CG	S-S	3.91283	hydrophobic,
PDB_3SPI	A	A	LOOP4	LOOP3	F	148	Q	126	CE1-CG	S-S	3.91283	carbonpi
PDB_3SPI	A	A	LOOP4	LOOP3	F	148	Q	126	CZ-CG	S-S	3.73614	hydrophobic,
PDB_3SPI	A	A	LOOP4	LOOP3	F	148	Q	126	CZ-CG	S-S	3.73614	carbonpi
PDB_3SPI	A	A	LOOP4	LOOP3	R	149	L	125	CA-O	M-M	3.40645	weakhydrogen,weakpolar,
PDB_3SPI	A	A	LOOP4	LOOP3	R	149	Q	126	CG-CB	S-S	3.90539	hydrophobic,
PDB_3SPI	A	A	LOOP4	LOOP3	R	149	Q	126	CG-O	S-M	3.48893	weakhydrogen,weakpolar,
PDB_3SPI	A	A	LOOP4	HELIX3	R	149	F	136	CB-CD1	S-S	3.79659	hydrophobic,
PDB_3SPI	A	A	LOOP4	HELIX3	R	149	F	136	CB-CB	S-S	4.08144	hydrophobic,
PDB_3SPI	A	A	LOOP4	HELIX3	R	149	E	139	NE-OE1	S-S	3.94136	ionic,
PDB_3SPI	A	A	LOOP4	HELIX3	R	149	E	139	NE-OE2	S-S	2.93643	ionic,polar,
PDB_3SPI	A	A	LOOP4	HELIX3	R	149	E	139	CZ-OE2	S-S	3.23938	ionic,
PDB_3SPI	A	A	LOOP4	HELIX3	R	149	E	139	NH2-OE2	S-S	2.71501	hydrogen,ionic,polar,
PDB_3SPI	A	D	LOOP4	LOOP4	R	149	C	150	NH2-SG	S-S	3.25943	hydrogen,polar,
PDB_3SPI	A	D	LOOP4	LOOP4	R	149	V	151	NH2-O	S-M	2.84755	hydrogen,polar,
PDB_3SPI	A	A	LOOP4	LOOP3	C	150	V	124	O-CG1	M-S	3.42732	weakpolar,
PDB_3SPI	A	A	LOOP4	LOOP3	C	150	V	124	O-CA	M-M	3.42258	weakpolar,
PDB_3SPI	A	A	LOOP4	LOOP3	C	150	V	124	O-C	M-M	3.5127	carbonyl,
PDB_3SPI	A	A	LOOP4	LOOP3	C	150	L	125	O-N	M-M	2.75364	hydrogen,polar,
PDB_3SPI	A	A	LOOP4	LOOP3	C	150	L	125	N-O	M-M	3.57	hydrogen,
PDB_3SPI	A	A	LOOP4	LOOP4	C	150	G	147	CB-O	S-M	3.5978	weakhydrogen,
PDB_3SPI	A	C	LOOP4	LOOP4	C	150	R	149	SG-NH2	S-S	3.25943	hydrogen,polar,
PDB_3SPI	A	A	LOOP4	LOOP3	V	151	V	124	CG2-CG2	S-S	4.16937	hydrophobic,
PDB_3SPI	A	A	LOOP4	HELIX3	V	151	F	136	CG2-CE1	S-S	3.94913	hydrophobic,
PDB_3SPI	A	A	LOOP4	HELIX3	V	151	F	136	CG2-CE2	S-S	4.08766	hydrophobic,
PDB_3SPI	A	A	LOOP4	HELIX3	V	151	F	136	CG2-CZ	S-S	3.17515	hydrophobic,
PDB_3SPI	A	C	LOOP4	HELIX19	V	151	L	135	CG1-CD2	S-S	4.03633	hydrophobic,
PDB_3SPI	A	C	LOOP4	LOOP4	V	151	R	149	O-NH2	M-S	2.84755	hydrogen,polar,
PDB_3SPI	A	A	LOOP4	LOOP3	T	152	P	122	OG1-O	S-M	2.58439	polar,
PDB_3SPI	A	A	LOOP4	LOOP3	T	152	C	123	N-O	M-M	3.10712	hydrogen,polar,
PDB_3SPI	A	A	LOOP4	LOOP3	T	152	C	123	OG1-O	S-M	2.98638	hydrogen,polar,
PDB_3SPI	A	A	LOOP4	LOOP3	T	152	L	125	CG2-CG	S-S	3.64803	hydrophobic,
PDB_3SPI	A	A	LOOP4	LOOP3	T	152	L	125	CG2-CD1	S-S	3.94035	hydrophobic,
PDB_3SPI	A	A	LOOP4	LOOP3	E	153	K	121	OE2-NZ	S-S	2.84356	hydrogen,ionic,polar,
PDB_3SPI	A	C	LOOP4	LOOP3	E	153	N	128	OE2-ND2	S-S	3.41899	hydrogen,polar,
PDB_3SPI	A	C	LOOP4	HELIX19	E	153	V	131	CB-CB	S-S	3.98207	hydrophobic,
PDB_3SPI	A	C	LOOP4	HELIX19	E	153	V	131	CB-CG1	S-S	3.68026	hydrophobic,
PDB_3SPI	A	C	LOOP4	HELIX19	E	153	A	132	CG-CB	S-S	4.1023	hydrophobic,
PDB_3SPI	A	C	LOOP4	HELIX19	E	153	L	135	CB-CD1	S-S	4.19988	hydrophobic,
PDB_3SPI	A	C	LOOP4	HELIX19	E	153	L	135	CG-CD1	S-S	4.05869	hydrophobic,
PDB_3SPI	A	A	LOOP4	LOOP3	E	154	K	121	OE1-NZ	S-S	3.5066	hydrogen,ionic,
PDB_3SPI	A	A	LOOP4	LOOP3	E	154	K	121	CB-CD	S-S	4.1048	hydrophobic,
PDB_3SPI	A	A	LOOP4	LOOP3	E	154	K	121	OE1-CD	S-S	3.43247	weakhydrogen,weakpolar,
PDB_3SPI	A	A	LOOP4	LOOP3	E	154	K	121	CG-O	S-M	3.56165	weakhydrogen,
PDB_3SPI	A	A	LOOP4	LOOP4	E	154	T	152	N-O	M-M	3.24719	hydrogen,polar,
PDB_3SPI	A	A	LOOP4	LOOP4	E	154	T	152	N-OG1	M-S	3.43782	hydrogen,polar,
PDB_3SPI	A	A	HELIX4	HELIX2	C	155	H	108	SG-CD2	S-S	3.858	donorpi
PDB_3SPI	A	A	HELIX4	LOOP3	C	155	C	123	CB-CB	S-S	3.86783	hydrophobic,
PDB_3SPI	A	A	HELIX4	LOOP3	C	155	C	123	CB-SG	S-S	3.44948	weakpolar,
PDB_3SPI	A	A	HELIX4	LOOP3	C	155	C	123	SG-CB	S-S	3.05041	weakpolar,
PDB_3SPI	A	A	HELIX4	LOOP3	C	155	C	123	SG-SG	S-S	2.02941	polar,
PDB_3SPI	A	A	HELIX4	LOOP4	P	156	E	154	CD-O	S-M	3.17105	weakhydrogen,weakpolar,
PDB_3SPI	A	A	HELIX4	HELIX4	L	157	C	155	N-O	M-M	3.42745	polar,
PDB_3SPI	A	A	HELIX4	LOOP3	A	158	V	124	CB-CG2	S-S	4.19155	hydrophobic,
PDB_3SPI	A	A	HELIX4	HELIX4	A	158	C	155	N-O	M-M	3.48826	polar,
PDB_3SPI	A	A	HELIX4	HELIX4	A	158	C	155	CB-CB	S-S	3.67538	hydrophobic,
PDB_3SPI	A	A	HELIX4	LOOP4	V	159	V	151	CG2-CG1	S-S	4.07926	hydrophobic,
PDB_3SPI	A	A	HELIX4	HELIX4	V	159	C	155	CB-O	S-M	3.48822	weakpolar,
PDB_3SPI	A	A	HELIX4	HELIX4	V	159	C	155	N-O	M-M	3.05742	hydrogen,polar,
PDB_3SPI	A	A	HELIX4	HELIX4	V	159	C	155	CG2-O	S-M	3.08495	weakhydrogen,weakpolar,
PDB_3SPI	A	A	HELIX4	HELIX4	V	159	P	156	CB-O	S-M	3.59979	weakhydrogen,
PDB_3SPI	A	C	HELIX4	HELIX19	V	159	L	135	CG1-CD2	S-S	4.2312	hydrophobic,
PDB_3SPI	A	C	HELIX4	HELIX19	V	159	L	135	CG2-CD2	S-S	3.83349	hydrophobic,
PDB_3SPI	A	A	HELIX4	HELIX4	F	160	P	156	N-O	M-M	2.73556	hydrogen,polar,
PDB_3SPI	A	A	HELIX4	HELIX4	F	160	P	156	CA-O	M-M	3.46598	weakpolar,
PDB_3SPI	A	A	HELIX4	HELIX4	F	160	P	156	CB-O	S-M	3.08618	weakpolar,
PDB_3SPI	A	A	HELIX4	HELIX4	F	160	L	157	CD2-CD1	S-S	4.04353	hydrophobic,
PDB_3SPI	A	A	HELIX4	HELIX4	F	160	L	157	N-O	M-M	3.42319	polar,
PDB_3SPI	A	A	HELIX4	HELIX4	F	160	L	157	CB-O	S-M	3.55065	weakhydrogen,
PDB_3SPI	A	A	HELIX4	HELIX4	F	160	A	158	N-O	M-M	3.45373	polar,
PDB_3SPI	A	A	HELIX4	HELIX2	M	161	F	97	CG-CD2	S-S	3.95093	hydrophobic,
PDB_3SPI	A	A	HELIX4	HELIX2	M	161	I	100	CG-CB	S-S	4.13698	hydrophobic,
PDB_3SPI	A	A	HELIX4	HELIX2	M	161	I	100	CG-CG2	S-S	3.47618	hydrophobic,
PDB_3SPI	A	A	HELIX4	HELIX2	M	161	I	100	SD-CG2	S-S	3.60521	weakhydrogen,hydrophobic,
PDB_3SPI	A	A	HELIX4	HELIX2	M	161	I	100	CE-CG2	S-S	3.54791	hydrophobic,
PDB_3SPI	A	A	HELIX4	HELIX2	M	161	F	101	CB-CE2	S-S	3.85737	hydrophobic,
PDB_3SPI	A	A	HELIX4	HELIX2	M	161	F	101	CB-CZ	S-S	4.01552	hydrophobic,
PDB_3SPI	A	A	HELIX4	HELIX4	M	161	L	157	CE-CG	S-S	3.83795	hydrophobic,
PDB_3SPI	A	A	HELIX4	HELIX4	M	161	L	157	CE-CD1	S-S	3.56705	hydrophobic,
PDB_3SPI	A	A	HELIX4	HELIX4	M	161	L	157	N-O	M-M	2.76116	hydrogen,polar,
PDB_3SPI	A	A	HELIX4	HELIX4	M	161	L	157	CB-O	S-M	3.21239	weakhydrogen,weakpolar,
PDB_3SPI	A	A	HELIX4	HELIX4	M	161	L	157	CE-O	S-M	3.58597	weakhydrogen,
PDB_3SPI	A	A	HELIX4	HELIX4	M	161	A	158	N-O	M-M	3.19494	hydrogen,polar,
PDB_3SPI	A	A	HELIX4	HELIX4	M	161	A	158	CB-O	S-M	3.45062	weakpolar,
PDB_3SPI	A	A	HELIX4	HELIX4	M	161	V	159	N-O	M-M	3.30089	polar,
PDB_3SPI	A	A	HELIX4	HELIX2	V	162	F	101	CG2-CE2	S-S	4.02299	hydrophobic,
PDB_3SPI	A	A	HELIX4	HELIX2	V	162	F	101	CG2-CZ	S-S	4.01491	hydrophobic,
PDB_3SPI	A	A	HELIX4	HELIX3	V	162	F	136	CG2-CZ	S-S	4.12937	hydrophobic,
PDB_3SPI	A	A	HELIX4	LOOP4	V	162	V	151	CG2-CG2	S-S	3.38473	hydrophobic,
PDB_3SPI	A	A	HELIX4	HELIX4	V	162	A	158	N-O	M-M	2.89708	hydrogen,polar,
PDB_3SPI	A	A	HELIX4	HELIX4	V	162	A	158	CG2-O	S-M	3.46158	weakhydrogen,weakpolar,
PDB_3SPI	A	A	HELIX4	HELIX4	V	162	V	159	CB-O	S-M	3.29626	weakhydrogen,weakpolar,
PDB_3SPI	A	A	HELIX4	HELIX4	V	162	V	159	N-O	M-M	3.12759	hydrogen,polar,
PDB_3SPI	A	A	HELIX4	HELIX4	V	162	F	160	N-O	M-M	3.32254	polar,
PDB_3SPI	A	A	HELIX4	HELIX4	V	163	V	159	CG2-O	S-M	3.31273	weakhydrogen,weakpolar,
PDB_3SPI	A	A	HELIX4	HELIX4	V	163	V	159	N-O	M-M	2.89002	hydrogen,polar,
PDB_3SPI	A	A	HELIX4	HELIX4	V	163	F	160	CB-O	S-M	3.08009	weakhydrogen,weakpolar,
PDB_3SPI	A	A	HELIX4	HELIX4	V	163	F	160	N-O	M-M	2.96315	hydrogen,polar,
PDB_3SPI	A	A	HELIX4	HELIX4	V	163	F	160	CA-O	M-M	3.33563	weakpolar,
PDB_3SPI	A	A	HELIX4	HELIX4	V	163	F	160	C-O	M-M	3.54261	carbonyl,
PDB_3SPI	A	A	HELIX4	HELIX4	V	163	M	161	N-O	M-M	3.40507	polar,
PDB_3SPI	A	C	HELIX4	HELIX18	V	163	W	94	CG1-CZ3	S-S	3.72347	hydrophobic,
PDB_3SPI	A	C	HELIX4	HELIX19	V	163	I	138	CG2-CD1	S-S	3.92773	hydrophobic,
PDB_3SPI	A	A	HELIX4	HELIX2	V	164	F	97	CG1-CE2	S-S	4.1198	hydrophobic,
PDB_3SPI	A	A	HELIX4	HELIX2	V	164	F	97	CG1-CZ	S-S	3.98885	hydrophobic,
PDB_3SPI	A	A	HELIX4	HELIX4	V	164	F	160	CG2-CD1	S-S	4.02012	hydrophobic,
PDB_3SPI	A	A	HELIX4	HELIX4	V	164	F	160	CG2-CD1	S-S	4.02012	carbonpi
PDB_3SPI	A	A	HELIX4	HELIX4	V	164	F	160	CG2-CD2	S-S	4.02462	hydrophobic,
PDB_3SPI	A	A	HELIX4	HELIX4	V	164	F	160	CG2-CD2	S-S	4.02462	carbonpi
PDB_3SPI	A	A	HELIX4	HELIX4	V	164	F	160	CG2-CE1	S-S	3.56573	hydrophobic,
PDB_3SPI	A	A	HELIX4	HELIX4	V	164	F	160	CG2-CE1	S-S	3.56573	carbonpi
PDB_3SPI	A	A	HELIX4	HELIX4	V	164	F	160	CG2-CE2	S-S	3.5733	hydrophobic,
PDB_3SPI	A	A	HELIX4	HELIX4	V	164	F	160	CG2-CE2	S-S	3.5733	carbonpi
PDB_3SPI	A	A	HELIX4	HELIX4	V	164	F	160	CG2-CZ	S-S	3.32135	hydrophobic,
PDB_3SPI	A	A	HELIX4	HELIX4	V	164	F	160	CG2-CZ	S-S	3.32135	carbonpi
PDB_3SPI	A	A	HELIX4	HELIX4	V	164	F	160	N-O	M-M	2.7987	hydrogen,polar,
PDB_3SPI	A	A	HELIX4	HELIX4	V	164	F	160	CG2-O	S-M	3.29312	weakhydrogen,weakpolar,
PDB_3SPI	A	A	HELIX4	HELIX4	V	164	F	160	CG2-O	S-M	3.29312	carbonpi
PDB_3SPI	A	A	HELIX4	HELIX4	V	164	M	161	N-O	M-M	3.1772	polar,
PDB_3SPI	A	A	HELIX4	HELIX4	V	164	M	161	CB-O	S-M	3.50705	weakhydrogen,
PDB_3SPI	A	A	HELIX4	HELIX4	V	164	V	162	N-O	M-M	3.41067	polar,
PDB_3SPI	A	A	HELIX4	HELIX2	Q	165	F	97	CB-CG	S-S	4.00736	hydrophobic,
PDB_3SPI	A	A	HELIX4	HELIX2	Q	165	F	97	CB-CG	S-S	4.00736	carbonpi
PDB_3SPI	A	A	HELIX4	HELIX2	Q	165	F	97	CG-CG	S-S	3.99565	hydrophobic,
PDB_3SPI	A	A	HELIX4	HELIX2	Q	165	F	97	CG-CG	S-S	3.99565	carbonpi
PDB_3SPI	A	A	HELIX4	HELIX2	Q	165	F	97	CG-CD1	S-S	3.93542	hydrophobic,
PDB_3SPI	A	A	HELIX4	HELIX2	Q	165	F	97	CG-CD1	S-S	3.93542	carbonpi
PDB_3SPI	A	A	HELIX4	HELIX2	Q	165	F	97	CB-CD2	S-S	3.67224	hydrophobic,
PDB_3SPI	A	A	HELIX4	HELIX2	Q	165	F	97	CB-CD2	S-S	3.67224	carbonpi
PDB_3SPI	A	A	HELIX4	HELIX2	Q	165	F	97	CB-CE1	S-S	4.01836	hydrophobic,
PDB_3SPI	A	A	HELIX4	HELIX2	Q	165	F	97	CB-CE1	S-S	4.01836	carbonpi
PDB_3SPI	A	A	HELIX4	HELIX2	Q	165	F	97	CG-CE1	S-S	4.07524	hydrophobic,
PDB_3SPI	A	A	HELIX4	HELIX2	Q	165	F	97	CG-CE1	S-S	4.07524	carbonpi
PDB_3SPI	A	A	HELIX4	HELIX2	Q	165	F	97	CB-CE2	S-S	3.50779	hydrophobic,
PDB_3SPI	A	A	HELIX4	HELIX2	Q	165	F	97	CB-CE2	S-S	3.50779	carbonpi
PDB_3SPI	A	A	HELIX4	HELIX2	Q	165	F	97	CB-CZ	S-S	3.69388	hydrophobic,
PDB_3SPI	A	A	HELIX4	HELIX2	Q	165	F	97	CB-CZ	S-S	3.69388	carbonpi
PDB_3SPI	A	A	HELIX4	HELIX3	Q	165	S	137	NE2-O	S-M	2.85731	hydrogen,polar,
PDB_3SPI	A	A	HELIX4	HELIX3	Q	165	S	137	NE2-OG	S-S	2.91783	hydrogen,polar,
PDB_3SPI	A	A	HELIX4	HELIX3	Q	165	Q	141	CG-CB	S-S	3.88844	hydrophobic,
PDB_3SPI	A	A	HELIX4	HELIX3	Q	165	Q	141	CG-CG	S-S	3.87442	hydrophobic,
PDB_3SPI	A	A	HELIX4	HELIX4	Q	165	M	161	N-O	M-M	2.76053	hydrogen,polar,
PDB_3SPI	A	A	HELIX4	HELIX4	Q	165	M	161	CB-O	S-M	3.34142	weakpolar,
PDB_3SPI	A	A	HELIX4	HELIX4	Q	165	V	162	N-O	M-M	3.23809	polar,
PDB_3SPI	A	A	HELIX4	HELIX4	Q	165	V	162	CB-O	S-M	3.68398	weakhydrogen,
PDB_3SPI	A	A	HELIX4	HELIX4	Q	165	V	163	N-O	M-M	3.31418	polar,
PDB_3SPI	A	A	HELIX4	HELIX4	S	166	V	162	CB-O	S-M	3.41804	weakpolar,
PDB_3SPI	A	A	HELIX4	HELIX4	S	166	V	162	OG-O	S-M	2.9648	polar,
PDB_3SPI	A	A	HELIX4	HELIX4	S	166	V	162	N-O	M-M	2.84424	hydrogen,polar,
PDB_3SPI	A	A	HELIX4	HELIX4	S	166	V	163	CB-O	S-M	3.42294	weakhydrogen,weakpolar,
PDB_3SPI	A	A	HELIX4	HELIX4	S	166	V	163	N-O	M-M	3.16795	hydrogen,polar,
PDB_3SPI	A	A	HELIX4	HELIX4	S	166	V	164	N-O	M-M	3.31284	polar,
PDB_3SPI	A	A	HELIX4	HELIX4	I	167	V	163	CD1-CG1	S-S	4.06455	hydrophobic,
PDB_3SPI	A	A	HELIX4	HELIX4	I	167	V	163	N-O	M-M	3.12686	hydrogen,polar,
PDB_3SPI	A	A	HELIX4	HELIX4	I	167	V	164	N-O	M-M	3.26796	polar,
PDB_3SPI	A	A	HELIX4	HELIX4	I	167	V	164	CB-O	S-M	3.52874	weakhydrogen,
PDB_3SPI	A	C	HELIX4	HELIX18	I	167	W	94	CG1-CH2	S-S	4.12732	hydrophobic,
PDB_3SPI	A	A	HELIX4	HELIX2	V	168	F	97	CG2-CZ	S-S	4.0281	hydrophobic,
PDB_3SPI	A	A	HELIX4	HELIX4	V	168	V	164	CG2-CG1	S-S	4.03712	hydrophobic,
PDB_3SPI	A	A	HELIX4	HELIX4	V	168	V	164	N-O	M-M	2.85368	hydrogen,polar,
PDB_3SPI	A	A	HELIX4	HELIX4	V	168	V	164	CB-O	S-M	3.42772	weakpolar,
PDB_3SPI	A	A	HELIX4	HELIX4	V	168	V	164	CG2-O	S-M	3.13708	weakhydrogen,weakpolar,
PDB_3SPI	A	A	HELIX4	HELIX4	V	168	Q	165	N-O	M-M	3.40928	polar,
PDB_3SPI	A	A	HELIX4	HELIX4	V	168	Q	165	CB-O	S-M	3.39815	weakhydrogen,weakpolar,
PDB_3SPI	A	A	HELIX4	HELIX4	V	168	S	166	N-O	M-M	3.33873	polar,
PDB_3SPI	A	A	HELIX4	HELIX4	G	169	Q	165	N-O	M-M	2.76133	hydrogen,polar,
PDB_3SPI	A	A	HELIX4	HELIX4	G	169	S	166	N-O	M-M	2.90525	hydrogen,polar,
PDB_3SPI	A	A	HELIX4	HELIX4	G	169	S	166	CA-O	M-M	3.33276	weakpolar,
PDB_3SPI	A	A	HELIX4	HELIX4	G	169	I	167	N-O	M-M	3.21665	polar,
PDB_3SPI	A	A	HELIX4	HELIX4	C	170	S	166	N-O	M-M	3.11129	hydrogen,polar,
PDB_3SPI	A	A	HELIX4	HELIX4	C	170	S	166	SG-O	S-M	3.32032	polar,
PDB_3SPI	A	A	HELIX4	HELIX4	C	170	I	167	N-O	M-M	3.07736	hydrogen,polar,
PDB_3SPI	A	A	HELIX4	HELIX4	C	170	I	167	CB-O	S-M	3.43689	weakhydrogen,weakpolar,
PDB_3SPI	A	A	HELIX4	HELIX4	C	170	V	168	N-O	M-M	3.26665	polar,
PDB_3SPI	A	C	HELIX4	HELIX20	C	170	M	176	CB-SD	S-S	3.6754	hydrophobic,
PDB_3SPI	A	A	HELIX4	HELIX4	I	171	I	167	CG1-O	S-M	3.23575	weakhydrogen,weakpolar,
PDB_3SPI	A	A	HELIX4	HELIX4	I	171	I	167	CD1-CG2	S-S	3.88393	hydrophobic,
PDB_3SPI	A	A	HELIX4	HELIX4	I	171	I	167	N-O	M-M	3.15719	hydrogen,polar,
PDB_3SPI	A	A	HELIX4	HELIX4	I	171	V	168	CB-O	S-M	3.20245	weakhydrogen,weakpolar,
PDB_3SPI	A	A	HELIX4	HELIX4	I	171	V	168	N-O	M-M	2.96593	hydrogen,polar,
PDB_3SPI	A	A	HELIX4	HELIX4	I	171	V	168	CA-O	M-M	3.4537	weakpolar,
PDB_3SPI	A	A	HELIX4	HELIX4	I	171	G	169	N-O	M-M	3.30808	polar,
PDB_3SPI	A	C	HELIX4	HELIX20	I	171	M	176	CG1-CE	S-S	3.64861	hydrophobic,
PDB_3SPI	A	A	HELIX4	HELIX2	I	172	F	90	CG2-CD1	S-S	4.04334	hydrophobic,
PDB_3SPI	A	A	HELIX4	HELIX2	I	172	F	90	CG2-CD1	S-S	4.04334	carbonpi
PDB_3SPI	A	A	HELIX4	HELIX2	I	172	F	90	CG2-CE1	S-S	3.60872	hydrophobic,
PDB_3SPI	A	A	HELIX4	HELIX2	I	172	F	90	CG2-CE1	S-S	3.60872	carbonpi
PDB_3SPI	A	A	HELIX4	HELIX2	I	172	F	90	CG2-CZ	S-S	3.83832	hydrophobic,
PDB_3SPI	A	A	HELIX4	HELIX2	I	172	F	90	CG2-CZ	S-S	3.83832	carbonpi
PDB_3SPI	A	A	HELIX4	HELIX4	I	172	V	168	CD1-CG1	S-S	4.1609	hydrophobic,
PDB_3SPI	A	A	HELIX4	HELIX4	I	172	V	168	N-O	M-M	3.14183	hydrogen,polar,
PDB_3SPI	A	A	HELIX4	HELIX4	I	172	G	169	N-O	M-M	3.40548	polar,
PDB_3SPI	A	A	HELIX4	HELIX4	I	172	C	170	N-O	M-M	3.42051	polar,
PDB_3SPI	A	A	HELIX4	HELIX4	D	173	G	169	N-O	M-M	3.20945	hydrogen,polar,
PDB_3SPI	A	A	HELIX4	HELIX4	D	173	C	170	N-O	M-M	3.28956	polar,
PDB_3SPI	A	A	HELIX4	HELIX4	D	173	C	170	CB-O	S-M	3.46584	weakhydrogen,weakpolar,
PDB_3SPI	A	A	HELIX4	HELIX4	D	173	I	171	N-O	M-M	3.47508	polar,
PDB_3SPI	A	A	HELIX4	HELIX4	S	174	C	170	OG-O	S-M	2.8988	polar,
PDB_3SPI	A	A	HELIX4	HELIX4	S	174	C	170	N-O	M-M	2.93895	hydrogen,polar,
PDB_3SPI	A	A	HELIX4	HELIX4	S	174	I	171	CB-O	S-M	3.42131	weakhydrogen,weakpolar,
PDB_3SPI	A	A	HELIX4	HELIX4	S	174	I	171	N-O	M-M	3.28442	polar,
PDB_3SPI	A	A	HELIX4	HELIX4	S	174	I	172	N-O	M-M	3.38072	polar,
PDB_3SPI	A	C	HELIX4	HELIX20	S	174	I	177	OG-CD1	S-S	3.10137	weakhydrogen,weakpolar,
PDB_3SPI	A	C	HELIX4	HELIX20	S	174	I	180	OG-CD1	S-S	3.69617	weakhydrogen,
PDB_3SPI	A	A	HELIX4	HELIX2	F	175	F	86	CB-CE2	S-S	3.971	hydrophobic,
PDB_3SPI	A	A	HELIX4	HELIX4	F	175	I	171	CD2-CG2	S-S	3.83526	hydrophobic,
PDB_3SPI	A	A	HELIX4	HELIX4	F	175	I	171	CE2-CG2	S-S	3.52556	hydrophobic,
PDB_3SPI	A	A	HELIX4	HELIX4	F	175	I	171	N-O	M-M	3.1597	hydrogen,polar,
PDB_3SPI	A	A	HELIX4	HELIX4	F	175	I	171	CD2-O	S-M	2.93984	weakhydrogen,weakpolar,
PDB_3SPI	A	A	HELIX4	HELIX4	F	175	I	172	N-O	M-M	3.20311	hydrogen,polar,
PDB_3SPI	A	A	HELIX4	HELIX4	F	175	I	172	CB-O	S-M	3.51891	weakhydrogen,
PDB_3SPI	A	A	HELIX4	HELIX4	F	175	D	173	N-O	M-M	3.16785	polar,
PDB_3SPI	A	C	HELIX4	HELIX18	F	175	W	79	CZ-CZ3	S-S	3.91076	hydrophobic,pi-pi,
PDB_3SPI	A	C	HELIX4	HELIX20	F	175	I	180	CD2-CG2	S-S	3.997	hydrophobic,
PDB_3SPI	A	C	HELIX4	HELIX20	F	175	I	180	CD2-CG2	S-S	3.997	carbonpi
PDB_3SPI	A	C	HELIX4	HELIX20	F	175	I	180	CE2-CG2	S-S	3.97897	hydrophobic,
PDB_3SPI	A	C	HELIX4	HELIX20	F	175	I	180	CE2-CG2	S-S	3.97897	carbonpi
PDB_3SPI	A	C	HELIX4	HELIX20	F	175	M	184	CD1-CE	S-S	4.10036	hydrophobic,
PDB_3SPI	A	C	HELIX4		F	175	PIO	400	CE2-C4A	S-L	3.87459	hydrophobic,
PDB_3SPI	A	C	HELIX4		F	175	PIO	400	CZ-C4A	S-L	3.81128	hydrophobic,
PDB_3SPI	A	A	HELIX4	HELIX2	M	176	F	86	CB-CE2	S-S	3.74368	hydrophobic,
PDB_3SPI	A	A	HELIX4	HELIX2	M	176	F	86	CB-CE2	S-S	3.74368	carbonpi
PDB_3SPI	A	A	HELIX4	HELIX2	M	176	F	86	CG-CG	S-S	3.95817	hydrophobic,
PDB_3SPI	A	A	HELIX4	HELIX2	M	176	F	86	CG-CG	S-S	3.95817	carbonpi
PDB_3SPI	A	A	HELIX4	HELIX2	M	176	F	86	CB-CD2	S-S	3.81112	hydrophobic,
PDB_3SPI	A	A	HELIX4	HELIX2	M	176	F	86	CB-CD2	S-S	3.81112	carbonpi
PDB_3SPI	A	A	HELIX4	HELIX2	M	176	F	86	CE-CB	S-S	4.13865	hydrophobic,
PDB_3SPI	A	A	HELIX4	HELIX2	M	176	F	86	CG-CD2	S-S	3.85806	hydrophobic,
PDB_3SPI	A	A	HELIX4	HELIX2	M	176	F	86	CG-CD2	S-S	3.85806	carbonpi
PDB_3SPI	A	A	HELIX4	HELIX2	M	176	F	90	SD-CE2	S-S	3.89504	weakhydrogen,hydrophobic,
PDB_3SPI	A	A	HELIX4	HELIX2	M	176	F	90	CE-CE2	S-S	3.99744	hydrophobic,
PDB_3SPI	A	A	HELIX4	HELIX2	M	176	F	90	SD-CZ	S-S	4.03704	hydrophobic,
PDB_3SPI	A	A	HELIX4	HELIX4	M	176	I	172	N-O	M-M	2.99901	hydrogen,polar,
PDB_3SPI	A	A	HELIX4	HELIX4	M	176	D	173	N-O	M-M	2.83257	hydrogen,polar,
PDB_3SPI	A	A	HELIX4	HELIX4	M	176	D	173	CA-O	M-M	3.37074	weakpolar,
PDB_3SPI	A	A	HELIX4	HELIX4	M	176	D	173	C-O	M-M	3.59176	carbonyl,
PDB_3SPI	A	A	HELIX4	HELIX4	M	176	D	173	CB-O	S-M	3.27155	weakpolar,
PDB_3SPI	A	A	HELIX4	HELIX4	M	176	S	174	N-O	M-M	3.44489	polar,
PDB_3SPI	A	D	HELIX4	HELIX28	M	176	C	170	SD-CB	S-S	3.6754	hydrophobic,
PDB_3SPI	A	D	HELIX4	HELIX28	M	176	I	171	CE-CG1	S-S	3.64861	hydrophobic,
PDB_3SPI	A	A	HELIX4	HELIX4	I	177	D	173	CG1-O	S-M	3.08853	weakhydrogen,weakpolar,
PDB_3SPI	A	A	HELIX4	HELIX4	I	177	D	173	N-O	M-M	2.85459	hydrogen,polar,
PDB_3SPI	A	A	HELIX4	HELIX4	I	177	S	174	CB-O	S-M	3.57679	weakhydrogen,
PDB_3SPI	A	A	HELIX4	HELIX4	I	177	S	174	N-O	M-M	3.39252	polar,
PDB_3SPI	A	A	HELIX4	HELIX4	I	177	F	175	N-O	M-M	3.44294	polar,
PDB_3SPI	A	D	HELIX4	HELIX28	I	177	S	174	CD1-OG	S-S	3.10137	weakhydrogen,weakpolar,
PDB_3SPI	A	A	HELIX4	HELIX4	G	178	S	174	N-O	M-M	3.05174	hydrogen,polar,
PDB_3SPI	A	A	HELIX4	HELIX4	G	178	F	175	N-O	M-M	3.38692	polar,
PDB_3SPI	A	A	HELIX4	HELIX4	G	178	M	176	N-O	M-M	3.46216	polar,
PDB_3SPI	A	C	HELIX4	HELIX20	G	178	M	181	CA-SD	M-S	3.37474	weakpolar,
PDB_3SPI	A	C	HELIX4	HELIX20	G	178	M	184	CA-SD	M-S	3.98837	weakhydrogen,
PDB_3SPI	A	A	HELIX4	HELIX2	A	179	M	82	CB-SD	S-S	3.9367	weakhydrogen,hydrophobic,
PDB_3SPI	A	A	HELIX4	HELIX2	A	179	F	86	CB-CE1	S-S	3.73879	hydrophobic,
PDB_3SPI	A	A	HELIX4	HELIX2	A	179	F	86	CB-CZ	S-S	3.7238	hydrophobic,
PDB_3SPI	A	A	HELIX4	HELIX4	A	179	F	175	N-O	M-M	2.89428	hydrogen,polar,
PDB_3SPI	A	A	HELIX4	HELIX4	A	179	F	175	CB-O	S-M	3.32643	weakpolar,
PDB_3SPI	A	A	HELIX4	HELIX4	A	179	M	176	N-O	M-M	3.35382	polar,
PDB_3SPI	A	A	HELIX4	HELIX4	A	179	M	176	CB-O	S-M	3.61042	weakhydrogen,
PDB_3SPI	A	A	HELIX4	HELIX4	A	179	I	177	N-O	M-M	3.31849	polar,
PDB_3SPI	A	A	HELIX4	HELIX2	I	180	M	82	CG1-CE	S-S	3.89328	hydrophobic,
PDB_3SPI	A	A	HELIX4	HELIX4	I	180	M	176	N-O	M-M	2.82135	hydrogen,polar,
PDB_3SPI	A	A	HELIX4	HELIX4	I	180	M	176	CB-O	S-M	3.32851	weakpolar,
PDB_3SPI	A	A	HELIX4	HELIX4	I	180	M	176	CG1-O	S-M	3.21809	weakhydrogen,weakpolar,
PDB_3SPI	A	A	HELIX4	HELIX4	I	180	M	176	CD1-CG	S-S	4.03791	hydrophobic,
PDB_3SPI	A	A	HELIX4	HELIX4	I	180	I	177	N-O	M-M	3.13842	hydrogen,polar,
PDB_3SPI	A	A	HELIX4	HELIX4	I	180	I	177	C-O	M-M	3.57577	carbonyl,
PDB_3SPI	A	A	HELIX4	HELIX4	I	180	G	178	N-O	M-M	3.38247	polar,
PDB_3SPI	A	D	HELIX4	HELIX28	I	180	S	174	CD1-OG	S-S	3.69617	weakhydrogen,
PDB_3SPI	A	D	HELIX4	HELIX28	I	180	F	175	CG2-CD2	S-S	3.997	hydrophobic,
PDB_3SPI	A	D	HELIX4	HELIX28	I	180	F	175	CG2-CD2	S-S	3.997	carbonpi
PDB_3SPI	A	D	HELIX4	HELIX28	I	180	F	175	CG2-CE2	S-S	3.97897	hydrophobic,
PDB_3SPI	A	D	HELIX4	HELIX28	I	180	F	175	CG2-CE2	S-S	3.97897	carbonpi
PDB_3SPI	A	A	HELIX4	HELIX4	M	181	I	177	CB-O	S-M	3.14089	weakpolar,
PDB_3SPI	A	A	HELIX4	HELIX4	M	181	I	177	N-O	M-M	2.63723	hydrogen,polar,
PDB_3SPI	A	A	HELIX4	HELIX4	M	181	I	177	CA-O	M-M	3.45509	weakpolar,
PDB_3SPI	A	A	HELIX4	HELIX4	M	181	G	178	CB-O	S-M	3.42013	weakhydrogen,weakpolar,
PDB_3SPI	A	A	HELIX4	HELIX4	M	181	G	178	N-O	M-M	3.30566	polar,
PDB_3SPI	A	C	HELIX4	HELIX20	M	181	M	181	CG-CE	S-S	3.85604	hydrophobic,
PDB_3SPI	A	D	HELIX4	HELIX28	M	181	G	178	SD-CA	S-M	3.37474	weakpolar,
PDB_3SPI	A	D	HELIX4	HELIX28	M	181	M	181	CE-CG	S-S	3.85604	hydrophobic,
PDB_3SPI	A	A	HELIX4	HELIX1	A	182	V	75	CB-CG1	S-S	3.98482	hydrophobic,
PDB_3SPI	A	A	HELIX4	HELIX4	A	182	G	178	CB-O	S-M	3.27023	weakpolar,
PDB_3SPI	A	A	HELIX4	HELIX4	A	182	G	178	N-O	M-M	2.72543	hydrogen,polar,
PDB_3SPI	A	A	HELIX4	HELIX4	A	182	A	179	CB-O	S-M	3.59449	weakhydrogen,
PDB_3SPI	A	A	HELIX4	HELIX4	A	182	A	179	N-O	M-M	3.40941	polar,
PDB_3SPI	A	A	HELIX4	HELIX4	A	182	I	180	N-O	M-M	3.43894	polar,
PDB_3SPI	A	A	HELIX4	HELIX1	K	183	V	75	CG-O	S-M	3.37601	weakhydrogen,weakpolar,
PDB_3SPI	A	A	HELIX4	HELIX1	K	183	V	75	NZ-O	S-M	2.65334	hydrogen,polar,
PDB_3SPI	A	A	HELIX4	LOOP2	K	183	I	77	NZ-O	S-M	2.61626	hydrogen,polar,
PDB_3SPI	A	A	HELIX4	LOOP2	K	183	I	77	CE-O	S-M	3.07264	weakpolar,
PDB_3SPI	A	A	HELIX4	HELIX2	K	183	W	79	CD-CD2	S-S	3.79557	hydrophobic,
PDB_3SPI	A	A	HELIX4	HELIX2	K	183	W	79	CD-CD2	S-S	3.79557	carbonpi
PDB_3SPI	A	A	HELIX4	HELIX2	K	183	W	79	CG-CE2	S-S	4.11198	carbonpi
PDB_3SPI	A	A	HELIX4	HELIX2	K	183	W	79	CD-CE2	S-S	3.81698	carbonpi
PDB_3SPI	A	A	HELIX4	HELIX2	K	183	W	79	CD-CE3	S-S	3.74229	hydrophobic,
PDB_3SPI	A	A	HELIX4	HELIX2	K	183	W	79	CD-CE3	S-S	3.74229	carbonpi
PDB_3SPI	A	A	HELIX4	HELIX2	K	183	W	79	CG-CZ2	S-S	3.66151	hydrophobic,
PDB_3SPI	A	A	HELIX4	HELIX2	K	183	W	79	CG-CZ2	S-S	3.66151	carbonpi
PDB_3SPI	A	A	HELIX4	HELIX2	K	183	W	79	CD-CZ2	S-S	3.81323	hydrophobic,
PDB_3SPI	A	A	HELIX4	HELIX2	K	183	W	79	CD-CZ2	S-S	3.81323	carbonpi
PDB_3SPI	A	A	HELIX4	HELIX2	K	183	W	79	CG-CZ3	S-S	4.12133	hydrophobic,
PDB_3SPI	A	A	HELIX4	HELIX2	K	183	W	79	CG-CZ3	S-S	4.12133	carbonpi
PDB_3SPI	A	A	HELIX4	HELIX2	K	183	W	79	CD-CZ3	S-S	3.70691	hydrophobic,
PDB_3SPI	A	A	HELIX4	HELIX2	K	183	W	79	CD-CZ3	S-S	3.70691	carbonpi
PDB_3SPI	A	A	HELIX4	HELIX2	K	183	W	79	CB-CH2	S-S	3.83984	hydrophobic,
PDB_3SPI	A	A	HELIX4	HELIX2	K	183	W	79	CG-CH2	S-S	3.65968	hydrophobic,
PDB_3SPI	A	A	HELIX4	HELIX2	K	183	W	79	CG-CH2	S-S	3.65968	carbonpi
PDB_3SPI	A	A	HELIX4	HELIX2	K	183	W	79	CD-CH2	S-S	3.74337	hydrophobic,
PDB_3SPI	A	A	HELIX4	HELIX2	K	183	W	79	CD-CH2	S-S	3.74337	carbonpi
PDB_3SPI	A	A	HELIX4	HELIX2	K	183	W	79	CE-CD2	S-S	3.66115	carbonpi
PDB_3SPI	A	A	HELIX4	HELIX2	K	183	W	79	CE-CD2	S-S	3.66115	carbonpi
PDB_3SPI	A	A	HELIX4	HELIX2	K	183	W	79	CE-NE1	S-S	3.91897	carbonpi
PDB_3SPI	A	A	HELIX4	HELIX2	K	183	W	79	CE-NE1	S-S	3.91897	carbonpi
PDB_3SPI	A	A	HELIX4	HELIX2	K	183	W	79	CE-CE2	S-S	3.66312	carbonpi
PDB_3SPI	A	A	HELIX4	HELIX2	K	183	W	79	CE-CE2	S-S	3.66312	carbonpi
PDB_3SPI	A	A	HELIX4	HELIX2	K	183	W	79	CE-CE3	S-S	4.09666	carbonpi
PDB_3SPI	A	A	HELIX4	HELIX2	K	183	W	79	CE-CE3	S-S	4.09666	carbonpi
PDB_3SPI	A	A	HELIX4	HELIX2	K	183	W	79	CE-CZ2	S-S	4.10779	carbonpi
PDB_3SPI	A	A	HELIX4	HELIX2	K	183	W	79	CE-CZ2	S-S	4.10779	carbonpi
PDB_3SPI	A	A	HELIX4	HELIX2	K	183	W	79	CE-N	S-M	3.97288	carbonpi
PDB_3SPI	A	A	HELIX4	HELIX2	K	183	W	79	CE-N	S-M	3.97288	carbonpi
PDB_3SPI	A	A	HELIX4	HELIX2	K	183	W	79	CE-CA	S-M	4.22548	carbonpi
PDB_3SPI	A	A	HELIX4	HELIX2	K	183	W	79	CE-CA	S-M	4.22548	carbonpi
PDB_3SPI	A	A	HELIX4	HELIX2	K	183	W	79	CE-CG	S-S	3.93707	carbonpi
PDB_3SPI	A	A	HELIX4	HELIX2	K	183	W	79	CE-CG	S-S	3.93707	carbonpi
PDB_3SPI	A	A	HELIX4	HELIX2	K	183	W	79	CE-CD1	S-S	4.0723	carbonpi
PDB_3SPI	A	A	HELIX4	HELIX2	K	183	W	79	CE-CD1	S-S	4.0723	carbonpi
PDB_3SPI	A	A	HELIX4	HELIX2	K	183	M	82	CD-SD	S-S	3.95358	hydrophobic,
PDB_3SPI	A	A	HELIX4	HELIX4	K	183	A	179	N-O	M-M	2.88075	hydrogen,polar,
PDB_3SPI	A	A	HELIX4	HELIX4	K	183	A	179	CB-O	S-M	3.45641	weakpolar,
PDB_3SPI	A	A	HELIX4	HELIX4	M	184	I	180	N-O	M-M	2.88313	hydrogen,polar,
PDB_3SPI	A	A	HELIX4	HELIX4	M	184	I	180	CB-O	S-M	3.12627	weakhydrogen,weakpolar,
PDB_3SPI	A	A	HELIX4	HELIX4	M	184	I	180	CE-O	S-M	3.2806	weakpolar,
PDB_3SPI	A	A	HELIX4	HELIX4	M	184	I	180	CE-CG2	S-S	3.42173	hydrophobic,
PDB_3SPI	A	A	HELIX4	HELIX4	M	184	M	181	N-O	M-M	3.49701	polar,
PDB_3SPI	A	A	HELIX4	HELIX4	M	184	M	181	CG-O	S-M	3.14358	weakhydrogen,weakpolar,
PDB_3SPI	A	A	HELIX4	HELIX4	M	184	A	182	N-O	M-M	3.21367	polar,
PDB_3SPI	A	D	HELIX4	HELIX25	M	184	F	71	O-CG	M-S	3.31517	weakpolar,
PDB_3SPI	A	D	HELIX4	HELIX25	M	184	F	71	CG-CE1	S-S	3.72456	hydrophobic,
PDB_3SPI	A	D	HELIX4	HELIX25	M	184	F	71	SD-CE1	S-S	3.96464	hydrophobic,
PDB_3SPI	A	D	HELIX4	HELIX25	M	184	F	71	CG-CD1	S-S	3.89372	hydrophobic,
PDB_3SPI	A	D	HELIX4	HELIX28	M	184	F	175	CE-CD1	S-S	4.10036	hydrophobic,
PDB_3SPI	A	D	HELIX4	HELIX28	M	184	G	178	SD-CA	S-M	3.98837	weakhydrogen,
PDB_3SPI	A	A	HELIX4	HELIX4	A	185	M	181	N-O	M-M	3.18801	hydrogen,polar,
PDB_3SPI	A	A	HELIX4	HELIX4	A	185	M	181	CB-O	S-M	3.37628	weakpolar,
PDB_3SPI	A	A	HELIX4	HELIX4	A	185	A	182	N-O	M-M	2.82288	hydrogen,polar,
PDB_3SPI	A	A	HELIX4	HELIX4	A	185	A	182	CA-O	M-M	3.43869	weakpolar,
PDB_3SPI	A	A	HELIX4	HELIX4	A	185	K	183	N-O	M-M	3.15898	polar,
PDB_3SPI	A	D	HELIX4	HELIX25	A	185	F	71	CA-CE2	M-S	3.77265	carbonpi
PDB_3SPI	A	D	HELIX4	HELIX25	A	185	F	71	CA-CZ	M-S	3.92739	carbonpi
PDB_3SPI	A	D	HELIX4	HELIX25	A	185	F	71	CB-CE2	S-S	4.11495	hydrophobic,
PDB_3SPI	A	D	HELIX4	HELIX25	A	185	F	71	CB-CZ	S-S	3.93133	hydrophobic,
PDB_3SPI	A	D	HELIX4	HELIX25	A	185	F	71	CA-CD2	M-S	4.08715	carbonpi
PDB_3SPI	A	A	HELIX4	HELIX1	R	186	V	75	NE-O	S-M	3.42146	polar,
PDB_3SPI	A	A	HELIX4	LOOP2	R	186	D	76	NE-OD1	S-S	3.62118	ionic,
PDB_3SPI	A	A	HELIX4	LOOP2	R	186	D	76	NH2-OD1	S-S	3.97083	ionic,
PDB_3SPI	A	A	HELIX4	HELIX4	R	186	A	182	N-O	M-M	3.39496	polar,
PDB_3SPI	A	A	HELIX4	HELIX4	R	186	K	183	CD-O	S-M	3.20085	weakhydrogen,weakpolar,
PDB_3SPI	A	A	HELIX4	HELIX4	R	186	K	183	N-O	M-M	3.40771	hydrogen,polar,
PDB_3SPI	A	A	HELIX4	HELIX4	R	186	K	183	NH1-O	S-M	2.90831	hydrogen,polar,
PDB_3SPI	A	C	HELIX4	LOOP14	R	186	A	305	CG-CB	S-S	3.95553	hydrophobic,
PDB_3SPI	A	C	HELIX4	LOOP14	P	187	A	305	CD-O	S-M	2.938	weakpolar,
PDB_3SPI	A	A	HELIX4	HELIX4	K	188	R	186	N-O	M-M	3.39529	polar,
PDB_3SPI	A	A	HELIX4	HELIX4	K	189	R	186	N-O	M-M	3.43853	hydrogen,polar,
PDB_3SPI	A	A	HELIX4	HELIX4	K	189	R	186	CB-O	S-M	3.52156	weakhydrogen,
PDB_3SPI	A	A	HELIX4	HELIX4	K	189	P	187	N-O	M-M	3.14847	polar,
PDB_3SPI	A	D	HELIX4	HELIX25	K	189	A	68	CB-O	S-M	3.63686	weakhydrogen,
PDB_3SPI	A	D	HELIX4	HELIX25	K	189	A	68	CD-O	S-M	3.46625	weakhydrogen,weakpolar,
PDB_3SPI	A	D	HELIX4	HELIX25	K	189	D	69	CB-OD1	S-S	3.4697	weakpolar,
PDB_3SPI	A	D	HELIX4	HELIX25	K	189	D	69	O-CB	M-S	3.49566	weakpolar,
PDB_3SPI	A	A	HELIX4	HELIX4	R	190	P	187	CB-O	S-M	3.34783	weakpolar,
PDB_3SPI	A	A	HELIX4	HELIX4	R	190	P	187	N-O	M-M	3.0752	hydrogen,polar,
PDB_3SPI	A	A	HELIX4	HELIX4	R	190	K	188	N-O	M-M	3.43377	polar,
PDB_3SPI	A	D	HELIX4	HELIX25	R	190	D	69	CD-OD2	S-S	3.24895	weakpolar,
PDB_3SPI	A	D	HELIX4	HELIX25	R	190	D	69	N-OD1	M-S	3.0107	polar,
PDB_3SPI	A	D	HELIX4	HELIX25	R	190	D	69	CA-OD1	M-S	3.1298	weakpolar,
PDB_3SPI	A	D	HELIX4	HELIX25	R	190	D	69	CA-OD2	M-S	3.48421	weakhydrogen,weakpolar,
PDB_3SPI	A	A	HELIX4	HELIX4	A	191	K	188	N-O	M-M	3.34594	hydrogen,polar,
PDB_3SPI	A	A	HELIX4	HELIX4	A	191	K	188	CB-O	S-M	3.43571	weakpolar,
PDB_3SPI	A	A	HELIX4	HELIX4	A	191	K	189	N-O	M-M	3.25049	polar,
PDB_3SPI	A	A	HELIX4	HELIX4	Q	192	K	189	N-O	M-M	3.2436	hydrogen,polar,
PDB_3SPI	A	A	HELIX4	HELIX4	Q	192	K	189	CG-O	S-M	3.29175	weakhydrogen,weakpolar,
PDB_3SPI	A	A	HELIX4	HELIX4	Q	192	K	189	CB-O	S-M	3.49592	weakpolar,
PDB_3SPI	A	A	HELIX4	HELIX4	Q	192	R	190	N-O	M-M	2.93589	hydrogen,polar,
PDB_3SPI	A	D	HELIX4	HELIX25	Q	192	R	65	O-NH1	M-S	2.66649	hydrogen,polar,
PDB_3SPI	A	D	HELIX4	HELIX25	Q	192	R	65	O-CD	M-S	3.50953	weakhydrogen,
PDB_3SPI	A	D	HELIX4	HELIX25	Q	192	R	65	O-CB	M-S	3.61625	weakhydrogen,
PDB_3SPI	A	A	LOOP5	HELIX4	T	193	R	190	OG1-O	S-M	2.81645	hydrogen,polar,
PDB_3SPI	A	A	LOOP5	HELIX4	T	193	R	190	OG1-CD	S-S	3.16586	weakhydrogen,weakpolar,
PDB_3SPI	A	A	LOOP5	HELIX4	T	193	R	190	N-O	M-M	2.97713	hydrogen,polar,
PDB_3SPI	A	A	LOOP5	HELIX4	T	193	R	190	O-NH1	M-S	3.53256	hydrogen,
PDB_3SPI	A	A	LOOP5	HELIX4	T	193	R	190	OG1-NH1	S-S	2.53316	hydrogen,polar,
PDB_3SPI	A	D	LOOP5	HELIX25	T	193	D	69	OG1-OD2	S-S	3.06186	hydrogen,polar,
PDB_3SPI	A	D	LOOP5	HELIX25	T	193	D	69	CG2-CB	S-S	4.0224	hydrophobic,
PDB_3SPI	A	A	SHEET1_1	HELIX4	L	194	R	190	CG-O	S-M	3.74233	weakhydrogen,
PDB_3SPI	A	A	SHEET1_1	HELIX4	L	194	A	191	N-O	M-M	3.53414	hydrogen,
PDB_3SPI	A	D	SHEET1_1	HELIX25	L	194	R	65	O-NH1	M-S	3.5148	hydrogen,
PDB_3SPI	A	A	LOOP6	LOOP1	H	198	K	48	O-NZ	M-S	2.77966	hydrogen,polar,
PDB_3SPI	A	A	LOOP6	LOOP6	N	199	S	197	O-CB	M-S	3.27774	weakpolar,
PDB_3SPI	A	A	LOOP6	LOOP6	N	199	S	197	O-OG	M-S	2.66646	hydrogen,polar,
PDB_3SPI	A	A	LOOP6	LOOP6	N	199	S	197	N-O	M-M	3.17699	polar,
PDB_3SPI	A	D	SHEET2_2	LOOP9	M	204	E	240	CB-OE2	S-S	3.62788	weakhydrogen,
PDB_3SPI	A	D	SHEET2_2	LOOP9	M	204	E	240	CB-CG	S-S	3.91065	hydrophobic,
PDB_3SPI	A	D	SHEET2_2	LOOP9	R	205	T	238	CG-CG2	S-S	4.08685	hydrophobic,
PDB_3SPI	A	D	SHEET2_2	LOOP9	R	205	E	242	NE-OE1	S-S	3.80269	ionic,
PDB_3SPI	A	D	SHEET2_2	LOOP9	R	205	E	242	NH2-OE1	S-S	3.85665	ionic,
PDB_3SPI	A	D	SHEET2_2	LOOP9	R	205	E	242	NH2-OE2	S-S	3.0245	hydrogen,ionic,polar,
PDB_3SPI	A	D	LOOP7	SHEET43_43	D	206	R	236	OD1-CZ	S-S	3.91113	ionic,
PDB_3SPI	A	D	LOOP7	SHEET43_43	D	206	R	236	OD1-NH2	S-S	3.86641	ionic,
PDB_3SPI	A	D	LOOP7	SHEET43_43	D	206	R	236	OD1-NH1	S-S	3.0531	hydrogen,ionic,polar,
PDB_3SPI	A	D	LOOP7	SHEET43_43	D	206	R	236	OD2-CZ	S-S	3.46726	ionic,
PDB_3SPI	A	D	LOOP7	SHEET43_43	D	206	R	236	OD2-NH2	S-S	2.74837	hydrogen,ionic,polar,
PDB_3SPI	A	D	LOOP7	SHEET43_43	D	206	R	236	OD2-NH1	S-S	3.37613	hydrogen,ionic,polar,
PDB_3SPI	A	D	LOOP7	LOOP9	D	206	T	238	OD1-CB	S-S	3.23814	weakhydrogen,weakpolar,
PDB_3SPI	A	D	LOOP7	LOOP9	D	206	E	239	CA-OE2	M-S	3.46774	weakpolar,
PDB_3SPI	A	D	LOOP7	LOOP9	D	206	E	240	N-OE1	M-S	2.87463	hydrogen,polar,
PDB_3SPI	A	D	LOOP7	LOOP9	D	206	E	240	N-OE2	M-S	3.30907	polar,
PDB_3SPI	A	A	LOOP7	SHEET2_2	G	207	M	204	O-CE	M-S	3.54219	weakhydrogen,
PDB_3SPI	A	A	LOOP7	SHEET2_2	G	207	R	205	N-O	M-M	3.30091	polar,
PDB_3SPI	A	D	LOOP7	LOOP9	G	207	E	240	N-OE2	M-S	2.79766	hydrogen,polar,
PDB_3SPI	A	A	SHEET3_3	SHEET2_2	K	208	M	204	O-CA	M-M	3.2112	weakhydrogen,weakpolar,
PDB_3SPI	A	A	SHEET3_3	SHEET2_2	K	208	M	204	O-C	M-M	3.4898	carbonyl,
PDB_3SPI	A	A	SHEET3_3	SHEET2_2	K	208	R	205	N-O	M-M	3.16507	hydrogen,polar,
PDB_3SPI	A	A	SHEET3_3	SHEET2_2	K	208	R	205	O-N	M-M	2.80857	hydrogen,polar,
PDB_3SPI	A	A	SHEET3_3	LOOP7	K	208	D	206	N-O	M-M	3.37283	polar,
PDB_3SPI	A	A	SHEET3_3	SHEET2_2	L	209	V	202	CD1-CG2	S-S	4.03354	hydrophobic,
PDB_3SPI	A	A	SHEET3_3	SHEET2_2	L	209	M	204	CB-SD	S-S	3.86303	weakhydrogen,hydrophobic,
PDB_3SPI	A	A	SHEET3_3	SHEET2_2	L	209	M	204	CD1-SD	S-S	3.9391	hydrophobic,
PDB_3SPI	A	A	SHEET3_3	SHEET2_2	C	210	V	202	O-CA	M-M	3.23067	weakhydrogen,weakpolar,
PDB_3SPI	A	A	SHEET3_3	SHEET2_2	C	210	A	203	N-O	M-M	2.89604	hydrogen,polar,
PDB_3SPI	A	A	SHEET3_3	SHEET2_2	C	210	A	203	O-N	M-M	3.10823	hydrogen,polar,
PDB_3SPI	A	A	SHEET3_3	SHEET3_3	C	210	K	208	SG-O	S-M	3.68624	hydrogen,
PDB_3SPI	A	A	SHEET3_3	SHEET2_2	L	211	A	200	CD1-CB	S-S	4.15408	hydrophobic,
PDB_3SPI	A	A	SHEET3_3	SHEET2_2	L	211	V	201	C-O	M-M	3.52155	carbonyl,
PDB_3SPI	A	A	SHEET3_3	SHEET2_2	L	211	V	201	CA-O	M-M	3.46173	weakhydrogen,weakpolar,
PDB_3SPI	A	A	SHEET3_3	SHEET2_2	L	211	V	201	CD1-O	S-M	3.5178	weakhydrogen,
PDB_3SPI	A	A	SHEET3_3	SHEET2_2	M	212	A	200	O-CB	M-S	3.43617	weakpolar,
PDB_3SPI	A	A	SHEET3_3	SHEET2_2	M	212	A	200	O-C	M-M	3.48915	carbonyl,
PDB_3SPI	A	A	SHEET3_3	SHEET2_2	M	212	A	200	O-CA	M-M	3.31933	weakpolar,
PDB_3SPI	A	A	SHEET3_3	SHEET2_2	M	212	V	201	N-O	M-M	2.6766	hydrogen,polar,
PDB_3SPI	A	A	SHEET3_3	SHEET2_2	M	212	V	201	CB-CG2	S-S	4.08295	hydrophobic,
PDB_3SPI	A	A	SHEET3_3	SHEET2_2	M	212	V	201	O-N	M-M	2.75344	hydrogen,polar,
PDB_3SPI	A	A	SHEET3_3	SHEET2_2	M	212	R	205	CE-CB	S-S	4.06735	hydrophobic,
PDB_3SPI	A	A	SHEET3_3	SHEET3_3	M	212	C	210	CE-CB	S-S	3.77184	hydrophobic,
PDB_3SPI	A	A	SHEET3_3	SHEET3_3	M	212	C	210	CG-CB	S-S	4.18262	hydrophobic,
PDB_3SPI	A	A	SHEET3_3	SHEET3_3	M	212	C	210	CG-O	S-M	3.76204	weakhydrogen,
PDB_3SPI	A	A	SHEET3_3	SHEET2_2	W	213	A	200	CB-CB	S-S	4.03579	hydrophobic,
PDB_3SPI	A	A	SHEET3_3	SHEET1_1	R	214	F	196	O-CA	M-M	3.38174	weakhydrogen,weakpolar,
PDB_3SPI	A	A	SHEET3_3	LOOP6	R	214	S	197	O-N	M-M	3.04357	hydrogen,polar,
PDB_3SPI	A	A	SHEET3_3	LOOP6	R	214	S	197	N-OG	M-S	3.03185	hydrogen,polar,
PDB_3SPI	A	A	SHEET3_3	SHEET1_1	V	215	L	195	C-O	M-M	3.54937	carbonyl,
PDB_3SPI	A	A	SHEET3_3	SHEET1_1	V	215	L	195	CA-O	M-M	3.14398	weakhydrogen,weakpolar,
PDB_3SPI	A	A	SHEET3_3	SHEET1_1	V	215	F	196	CG1-CE1	S-S	3.75198	hydrophobic,
PDB_3SPI	A	A	SHEET3_3	SHEET1_1	V	215	F	196	CG1-CD1	S-S	3.84892	hydrophobic,
PDB_3SPI	A	A	SHEET3_3	SHEET1_1	G	216	L	195	N-O	M-M	3.02078	hydrogen,polar,
PDB_3SPI	A	A	SHEET3_3	SHEET1_1	G	216	L	195	O-N	M-M	3.05201	hydrogen,polar,
PDB_3SPI	A	A	SHEET3_3	HELIX4	N	217	R	190	OD1-NH2	S-S	2.6948	hydrogen,polar,
PDB_3SPI	A	A	SHEET3_3	HELIX4	N	217	R	190	OD1-NH1	S-S	3.39888	hydrogen,polar,
PDB_3SPI	A	D	SHEET3_3	LOOP1	N	217	F	56	O-CZ	M-S	3.33015	weakpolar,
PDB_3SPI	A	D	SHEET3_3	LOOP1	N	217	F	56	O-CD2	M-S	3.47523	weakpolar,
PDB_3SPI	A	D	SHEET3_3	LOOP1	N	217	F	56	O-CE2	M-S	2.84971	weakpolar,
PDB_3SPI	A	A	LOOP8	LOOP5	L	218	T	193	N-O	M-M	2.80799	hydrogen,polar,
PDB_3SPI	A	A	LOOP8	LOOP5	L	218	T	193	CA-O	M-M	3.37036	weakpolar,
PDB_3SPI	A	A	LOOP8	LOOP5	L	218	T	193	CB-O	S-M	2.95631	weakpolar,
PDB_3SPI	A	A	LOOP8	LOOP5	L	218	T	193	CG-O	S-M	3.12541	weakpolar,
PDB_3SPI	A	A	LOOP8	SHEET1_1	L	218	L	195	CD2-CD2	S-S	4.04854	hydrophobic,
PDB_3SPI	A	D	LOOP8	LOOP1	L	218	M	59	CB-CE	S-S	3.28683	hydrophobic,
PDB_3SPI	A	D	LOOP8	LOOP1	L	218	M	59	CD2-CE	S-S	3.56177	hydrophobic,
PDB_3SPI	A	D	LOOP8	LOOP1	L	218	M	59	CB-SD	S-S	4.19383	hydrophobic,
PDB_3SPI	A	D	LOOP8	LOOP1	L	218	M	59	CG-CE	S-S	3.81478	hydrophobic,
PDB_3SPI	A	D	LOOP8	LOOP1	L	218	M	59	CD1-CE	S-S	4.11814	hydrophobic,
PDB_3SPI	A	D	LOOP8	HELIX25	L	218	Y	66	O-OH	M-S	2.66212	hydrogen,polar,
PDB_3SPI	A	A	LOOP8	LOOP5	R	219	T	193	CG-CG2	S-S	3.71671	hydrophobic,
PDB_3SPI	A	A	LOOP8	SHEET3_3	R	219	N	217	O-ND2	M-S	2.96727	polar,
PDB_3SPI	A	A	LOOP8	SHEET3_3	R	219	N	217	N-OD1	M-S	3.20671	hydrogen,polar,
PDB_3SPI	A	D	LOOP8	LOOP1	R	219	F	56	O-CE2	M-S	3.40612	weakhydrogen,weakpolar,
PDB_3SPI	A	D	LOOP8	HELIX25	R	219	Y	66	NH2-O	S-M	3.98306	cationpi
PDB_3SPI	A	D	LOOP8	HELIX25	R	219	Y	66	CZ-CD1	S-S	3.90746	cationpi
PDB_3SPI	A	D	LOOP8	HELIX25	R	219	Y	66	CZ-CE1	S-S	3.87728	cationpi
PDB_3SPI	A	D	LOOP8	HELIX25	R	219	Y	66	NH2-CD1	S-S	3.80135	cationpi
PDB_3SPI	A	D	LOOP8	HELIX25	R	219	Y	66	CA-OH	M-S	3.58203	weakhydrogen,
PDB_3SPI	A	D	LOOP8	HELIX25	R	219	D	69	NE-OD2	S-S	2.68227	ionic,polar,
PDB_3SPI	A	D	LOOP8	HELIX25	R	219	D	69	CZ-OD2	S-S	3.4491	ionic,
PDB_3SPI	A	D	LOOP8	HELIX25	R	219	D	69	NH2-OD2	S-S	3.39791	hydrogen,ionic,polar,
PDB_3SPI	A	D	LOOP8	HELIX25	R	219	D	69	NH2-O	S-M	3.32146	hydrogen,polar,
PDB_3SPI	A	D	LOOP8	HELIX25	R	219	T	73	NH1-OG1	S-S	2.81112	hydrogen,polar,
PDB_3SPI	A	D	LOOP8	HELIX25	R	219	T	73	NH2-OG1	S-S	2.75117	hydrogen,polar,
PDB_3SPI	A	D	LOOP8	LOOP1	K	220	E	55	CD-OE2	S-S	3.46651	weakhydrogen,weakpolar,
PDB_3SPI	A	D	LOOP8	LOOP1	K	220	E	55	NZ-OE2	S-S	3.69901	hydrogen,ionic,
PDB_3SPI	A	A	LOOP8	HELIX4	S	221	R	190	O-NH2	M-S	3.22427	hydrogen,polar,
PDB_3SPI	A	A	LOOP8	HELIX4	S	221	R	190	OG-NH2	S-S	3.44324	hydrogen,polar,
PDB_3SPI	A	A	LOOP8	SHEET3_3	S	221	N	217	O-ND2	M-S	2.7421	hydrogen,polar,
PDB_3SPI	A	A	LOOP8	LOOP8	S	221	R	219	OG-CB	S-S	3.44342	weakpolar,
PDB_3SPI	A	A	LOOP8	LOOP8	S	221	R	219	N-O	M-M	3.42123	polar,
PDB_3SPI	A	D	LOOP8	LOOP1	H	222	C	52	NE2-SG	S-S	3.25942	polar,
PDB_3SPI	A	D	LOOP8	SHEET47_47	H	222	R	313	CG-NH1	S-S	3.97072	cationpi
PDB_3SPI	A	D	LOOP8	SHEET47_47	H	222	R	313	CE1-NH1	S-S	3.65682	cationpi
PDB_3SPI	A	D	LOOP8	SHEET47_47	H	222	R	313	ND1-NH1	S-S	3.55337	cationpi
PDB_3SPI	A	A	SHEET4_4	HELIX4	I	223	R	190	CD1-CG	S-S	4.1055	hydrophobic,
PDB_3SPI	A	A	SHEET4_4	SHEET1_1	I	223	L	194	CG1-CD2	S-S	3.77875	hydrophobic,
PDB_3SPI	A	A	SHEET4_4	SHEET1_1	I	223	L	194	CD1-CD2	S-S	4.05098	hydrophobic,
PDB_3SPI	A	D	SHEET4_4	SHEET47_47	V	224	T	309	CG1-CG2	S-S	3.49531	hydrophobic,
PDB_3SPI	A	D	SHEET4_4	SHEET47_47	V	224	Q	311	CG1-CB	S-S	4.05526	hydrophobic,
PDB_3SPI	A	D	SHEET4_4	SHEET47_47	V	224	Q	311	CG2-CB	S-S	4.07677	hydrophobic,
PDB_3SPI	A	D	SHEET4_4	SHEET43_43	E	225	H	227	OE1-CE1	S-S	3.25765	ionic,
PDB_3SPI	A	D	SHEET4_4	SHEET46_46	E	225	E	300	CG-CB	S-S	4.19378	hydrophobic,
PDB_3SPI	A	D	SHEET4_4	SHEET46_46	E	225	E	300	CG-CG	S-S	4.13005	hydrophobic,
PDB_3SPI	A	D	SHEET4_4	SHEET46_46	E	225	E	300	N-OE2	M-S	3.56683	hydrogen,
PDB_3SPI	A	D	SHEET4_4	SHEET47_47	E	225	T	309	OE1-CG2	S-S	3.48807	weakpolar,
PDB_3SPI	A	A	SHEET4_4	SHEET4_4	A	226	I	223	CB-CG2	S-S	3.59721	hydrophobic,
PDB_3SPI	A	A	SHEET4_4	SHEET4_4	A	226	V	224	N-O	M-M	3.09161	polar,
PDB_3SPI	A	C	SHEET4_4	SHEET30_30	H	227	E	225	CE1-OE1	S-S	3.25765	ionic,
PDB_3SPI	A	C	SHEET4_4	LOOP11	R	229	I	262	NH2-O	S-M	3.44834	hydrogen,polar,
PDB_3SPI	A	C	SHEET4_4	LOOP11	R	229	I	262	NH1-O	S-M	3.55719	hydrogen,
PDB_3SPI	A	A	SHEET4_4	SHEET3_3	A	230	W	213	CB-CH2	S-S	3.83064	hydrophobic,
PDB_3SPI	A	A	SHEET4_4	SHEET3_3	A	230	W	213	CB-CZ2	S-S	3.96548	hydrophobic,
PDB_3SPI	A	A	SHEET4_4	SHEET4_4	K	234	L	232	CB-CD2	S-S	4.12279	hydrophobic,
PDB_3SPI	A	A	SHEET4_4	SHEET4_4	K	234	L	232	CG-CD2	S-S	3.95819	hydrophobic,
PDB_3SPI	A	C	SHEET4_4	LOOP7	R	236	D	206	CZ-OD1	S-S	3.91113	ionic,
PDB_3SPI	A	C	SHEET4_4	LOOP7	R	236	D	206	NH2-OD1	S-S	3.86641	ionic,
PDB_3SPI	A	C	SHEET4_4	LOOP7	R	236	D	206	CZ-OD2	S-S	3.46726	ionic,
PDB_3SPI	A	C	SHEET4_4	LOOP7	R	236	D	206	NH2-OD2	S-S	2.74837	hydrogen,ionic,polar,
PDB_3SPI	A	C	SHEET4_4	LOOP7	R	236	D	206	NH1-OD1	S-S	3.0531	hydrogen,ionic,polar,
PDB_3SPI	A	C	SHEET4_4	LOOP7	R	236	D	206	NH1-OD2	S-S	3.37613	hydrogen,ionic,polar,
PDB_3SPI	A	C	LOOP9	SHEET28_28	T	238	R	205	CG2-CG	S-S	4.08685	hydrophobic,
PDB_3SPI	A	C	LOOP9	LOOP7	T	238	D	206	CB-OD1	S-S	3.23814	weakhydrogen,weakpolar,
PDB_3SPI	A	C	LOOP9	LOOP7	E	239	D	206	OE2-CA	S-M	3.46774	weakpolar,
PDB_3SPI	A	A	LOOP9	LOOP9	E	240	T	238	N-OG1	M-S	3.20155	hydrogen,polar,
PDB_3SPI	A	A	LOOP9	LOOP9	E	240	T	238	CB-OG1	S-S	3.51803	weakhydrogen,
PDB_3SPI	A	A	LOOP9	LOOP9	E	240	T	238	OE1-OG1	S-S	3.05369	polar,
PDB_3SPI	A	A	LOOP9	LOOP9	E	240	T	238	N-O	M-M	2.85093	polar,
PDB_3SPI	A	C	LOOP9	SHEET28_28	E	240	M	204	CG-CB	S-S	3.91065	hydrophobic,
PDB_3SPI	A	C	LOOP9	SHEET28_28	E	240	M	204	OE2-CB	S-S	3.62788	weakhydrogen,
PDB_3SPI	A	C	LOOP9	LOOP7	E	240	D	206	OE1-N	S-M	2.87463	hydrogen,polar,
PDB_3SPI	A	C	LOOP9	LOOP7	E	240	D	206	OE2-N	S-M	3.30907	polar,
PDB_3SPI	A	C	LOOP9	LOOP7	E	240	G	207	OE2-N	S-M	2.79766	hydrogen,polar,
PDB_3SPI	A	A	LOOP9	LOOP9	G	241	T	238	N-O	M-M	2.61556	hydrogen,polar,
PDB_3SPI	A	A	LOOP9	LOOP9	G	241	T	238	CA-O	M-M	3.33765	weakpolar,
PDB_3SPI	A	A	LOOP9	SHEET4_4	E	242	I	237	O-CA	M-M	3.26712	weakhydrogen,weakpolar,
PDB_3SPI	A	A	LOOP9	LOOP9	E	242	T	238	CB-OG1	S-S	3.5218	weakhydrogen,
PDB_3SPI	A	A	LOOP9	LOOP9	E	242	T	238	O-CG2	M-S	3.54847	weakhydrogen,
PDB_3SPI	A	A	LOOP9	LOOP9	E	242	T	238	CB-CG2	S-S	3.99392	hydrophobic,
PDB_3SPI	A	A	LOOP9	LOOP9	E	242	T	238	N-OG1	M-S	3.42579	hydrogen,polar,
PDB_3SPI	A	A	LOOP9	LOOP9	E	242	T	238	O-N	M-M	3.00477	hydrogen,polar,
PDB_3SPI	A	C	LOOP9	SHEET28_28	E	242	R	205	OE1-NE	S-S	3.80269	ionic,
PDB_3SPI	A	C	LOOP9	SHEET28_28	E	242	R	205	OE1-NH2	S-S	3.85665	ionic,
PDB_3SPI	A	C	LOOP9	SHEET28_28	E	242	R	205	OE2-NH2	S-S	3.0245	hydrogen,ionic,polar,
PDB_3SPI	A	C	LOOP9	SHEET36_36	E	242	R	326	OE1-CD	S-S	3.50023	weakhydrogen,
PDB_3SPI	A	C	LOOP9	SHEET36_36	E	242	R	326	OE1-NE	S-S	3.7281	ionic,
PDB_3SPI	A	C	LOOP9	SHEET36_36	E	242	R	326	OE2-CG	S-S	3.50438	weakhydrogen,
PDB_3SPI	A	A	SHEET5_5	SHEET4_4	Y	243	P	235	CE1-CB	S-S	4.0151	hydrophobic,
PDB_3SPI	A	A	SHEET5_5	SHEET4_4	Y	243	P	235	OH-CB	S-S	3.40266	weakpolar,
PDB_3SPI	A	A	SHEET5_5	SHEET4_4	Y	243	R	236	CA-O	M-M	3.71553	weakhydrogen,
PDB_3SPI	A	A	SHEET5_5	SHEET4_4	Y	243	I	237	CD1-CG1	S-S	3.8056	hydrophobic,
PDB_3SPI	A	A	SHEET5_5	SHEET4_4	I	244	P	235	O-CA	M-M	3.33517	weakhydrogen,weakpolar,
PDB_3SPI	A	A	SHEET5_5	SHEET4_4	I	244	R	236	N-O	M-M	2.88772	hydrogen,polar,
PDB_3SPI	A	A	SHEET5_5	SHEET4_4	I	244	R	236	O-N	M-M	3.24994	hydrogen,polar,
PDB_3SPI	A	A	SHEET5_5	LOOP9	I	244	T	238	CD1-CG2	S-S	4.01409	hydrophobic,
PDB_3SPI	A	A	SHEET5_5	SHEET4_4	P	245	P	235	O-CA	M-M	3.28305	weakpolar,
PDB_3SPI	A	A	SHEET5_5	SHEET4_4	P	245	P	235	O-CB	M-S	2.93686	weakhydrogen,weakpolar,
PDB_3SPI	A	A	SHEET5_5	SHEET5_5	P	245	Y	243	CD-O	S-M	3.58751	weakhydrogen,
PDB_3SPI	A	C	SHEET5_5	LOOP17	P	245	P	329	CG-CB	S-S	3.85406	hydrophobic,
PDB_3SPI	A	C	SHEET5_5	SHEET37_37	P	245	L	331	CB-CB	S-S	4.10055	hydrophobic,
PDB_3SPI	A	C	SHEET5_5	SHEET37_37	P	245	L	331	CB-CG	S-S	4.10415	hydrophobic,
PDB_3SPI	A	C	SHEET5_5	SHEET37_37	P	245	L	331	CB-CD2	S-S	4.12354	hydrophobic,
PDB_3SPI	A	C	SHEET5_5	SHEET37_37	P	245	L	331	CB-O	S-M	3.41471	weakpolar,
PDB_3SPI	A	C	SHEET5_5	SHEET37_37	P	245	L	331	CG-O	S-M	3.44076	weakpolar,
PDB_3SPI	A	A	SHEET5_5	LOOP1	L	246	F	45	CD1-CD2	S-S	4.08628	hydrophobic,
PDB_3SPI	A	A	SHEET5_5	LOOP1	L	246	F	45	CD1-CD2	S-S	4.08628	carbonpi
PDB_3SPI	A	A	SHEET5_5	LOOP1	L	246	F	45	CD1-CD1	S-S	3.9055	hydrophobic,
PDB_3SPI	A	A	SHEET5_5	LOOP1	L	246	F	45	CD1-CD1	S-S	3.9055	carbonpi
PDB_3SPI	A	A	SHEET5_5	LOOP1	L	246	F	45	CD1-CB	S-S	4.13231	hydrophobic,
PDB_3SPI	A	A	SHEET5_5	LOOP1	L	246	F	45	CD1-CB	S-S	4.13231	carbonpi
PDB_3SPI	A	A	SHEET5_5	LOOP1	L	246	F	45	CD1-CG	S-S	3.785	hydrophobic,
PDB_3SPI	A	A	SHEET5_5	LOOP1	L	246	F	45	CD1-CG	S-S	3.785	carbonpi
PDB_3SPI	A	A	SHEET5_5	SHEET4_4	L	246	I	233	CB-CG2	S-S	4.14183	hydrophobic,
PDB_3SPI	A	A	SHEET5_5	SHEET4_4	L	246	I	233	CG-CG2	S-S	3.97883	hydrophobic,
PDB_3SPI	A	A	SHEET5_5	SHEET4_4	L	246	I	233	CD1-CG2	S-S	3.64231	hydrophobic,
PDB_3SPI	A	A	SHEET5_5	SHEET4_4	L	246	I	233	CD2-CG2	S-S	3.58855	hydrophobic,
PDB_3SPI	A	A	SHEET5_5	SHEET5_5	L	246	I	244	N-O	M-M	3.14845	polar,
PDB_3SPI	A	C	SHEET5_5	SHEET37_37	L	246	L	331	CB-CD2	S-S	4.00769	hydrophobic,
PDB_3SPI	A	C	SHEET5_5	SHEET37_37	L	246	L	331	CG-CD2	S-S	4.19273	hydrophobic,
PDB_3SPI	A	C	SHEET5_5	SHEET37_37	L	246	L	331	CD1-CD2	S-S	4.23282	hydrophobic,
PDB_3SPI	A	A	SHEET5_5	SHEET4_4	D	247	I	233	O-CA	M-M	3.56987	weakhydrogen,
PDB_3SPI	A	A	SHEET5_5	SHEET4_4	D	247	K	234	N-O	M-M	3.0584	hydrogen,polar,
PDB_3SPI	A	A	SHEET5_5	SHEET4_4	D	247	K	234	O-N	M-M	3.41048	hydrogen,polar,
PDB_3SPI	A	A	SHEET5_5	SHEET4_4	D	247	R	236	OD2-NE	S-S	2.9867	ionic,polar,
PDB_3SPI	A	A	SHEET5_5	SHEET4_4	D	247	R	236	OD2-CZ	S-S	3.75219	ionic,
PDB_3SPI	A	A	SHEET5_5	SHEET4_4	D	247	R	236	OD2-NH2	S-S	3.62714	ionic,
PDB_3SPI	A	A	SHEET5_5	SHEET5_5	D	247	I	244	CB-CG2	S-S	3.9053	hydrophobic,
PDB_3SPI	A	A	SHEET5_5	SHEET4_4	Q	248	I	233	CB-CD1	S-S	3.85204	hydrophobic,
PDB_3SPI	A	A	SHEET5_5	SHEET4_4	Q	248	I	233	CG-CD1	S-S	3.46422	hydrophobic,
PDB_3SPI	A	A	SHEET5_5	SHEET4_4	I	249	Q	231	O-CA	M-M	3.08084	weakhydrogen,weakpolar,
PDB_3SPI	A	A	SHEET5_5	SHEET4_4	I	249	Q	231	O-C	M-M	3.35748	carbonyl,
PDB_3SPI	A	A	SHEET5_5	SHEET4_4	I	249	L	232	O-N	M-M	2.69518	hydrogen,polar,
PDB_3SPI	A	A	SHEET5_5	SHEET4_4	I	249	L	232	N-O	M-M	3.00616	hydrogen,polar,
PDB_3SPI	A	A	SHEET5_5	SHEET4_4	D	250	A	230	CA-O	M-M	3.7013	weakhydrogen,
PDB_3SPI	A	C	SHEET5_5	LOOP11	D	250	L	259	CB-CD2	S-S	3.92297	hydrophobic,
PDB_3SPI	A	A	SHEET5_5	SHEET4_4	I	251	A	230	N-O	M-M	2.83062	hydrogen,polar,
PDB_3SPI	A	A	SHEET5_5	SHEET4_4	I	251	A	230	CB-O	S-M	3.61557	weakhydrogen,
PDB_3SPI	A	A	SHEET5_5	SHEET4_4	I	251	A	230	CB-CB	S-S	3.49968	hydrophobic,
PDB_3SPI	A	A	SHEET5_5	SHEET4_4	I	251	A	230	CG2-CB	S-S	3.7976	hydrophobic,
PDB_3SPI	A	A	SHEET5_5	SHEET4_4	I	251	A	230	CD1-CB	S-S	4.21643	hydrophobic,
PDB_3SPI	A	A	SHEET5_5	SHEET5_5	I	251	I	249	N-O	M-M	3.35637	polar,
PDB_3SPI	A	A	LOOP10	SHEET3_3	V	253	W	213	CG1-CH2	S-S	3.65052	hydrophobic,
PDB_3SPI	A	A	LOOP10	SHEET3_3	V	253	W	213	CG1-CZ2	S-S	3.90165	hydrophobic,
PDB_3SPI	A	A	LOOP10	SHEET4_4	V	253	V	228	CG2-CG2	S-S	3.62829	hydrophobic,
PDB_3SPI	A	A	LOOP10	SHEET4_4	V	253	V	228	CB-CG2	S-S	4.10709	hydrophobic,
PDB_3SPI	A	A	LOOP10	SHEET5_5	V	253	I	251	N-O	M-M	3.24648	polar,
PDB_3SPI	A	A	HELIX5	LOOP10	G	254	D	252	N-OD1	M-S	2.81254	hydrogen,polar,
PDB_3SPI	A	A	HELIX5	LOOP10	G	254	D	252	CA-OD1	M-S	3.48625	weakpolar,
PDB_3SPI	A	A	HELIX5	LOOP10	F	255	D	252	N-OD1	M-S	3.34795	hydrogen,polar,
PDB_3SPI	A	A	HELIX5	HELIX5	D	256	G	254	N-O	M-M	3.06185	polar,
PDB_3SPI	A	A	HELIX5	HELIX5	K	257	G	254	N-O	M-M	3.01233	hydrogen,polar,
PDB_3SPI	A	A	HELIX5	HELIX5	K	257	F	255	N-O	M-M	3.27355	polar,
PDB_3SPI	A	A	HELIX5	HELIX5	G	258	G	254	N-O	M-M	3.10712	hydrogen,polar,
PDB_3SPI	A	A	HELIX5	HELIX5	G	258	F	255	N-O	M-M	3.02988	hydrogen,polar,
PDB_3SPI	A	A	LOOP11	HELIX5	L	259	G	254	N-O	M-M	2.82691	hydrogen,polar,
PDB_3SPI	A	A	LOOP11	HELIX5	L	259	G	254	CB-O	S-M	3.49295	weakhydrogen,weakpolar,
PDB_3SPI	A	A	LOOP11	HELIX5	L	259	K	257	CG-CB	S-S	3.89064	hydrophobic,
PDB_3SPI	A	D	LOOP11	SHEET44_44	L	259	D	250	CD2-CB	S-S	3.92297	hydrophobic,
PDB_3SPI	A	A	LOOP11	SHEET4_4	D	260	H	227	O-CA	M-M	3.11045	weakpolar,
PDB_3SPI	A	A	LOOP11	SHEET4_4	D	260	H	227	O-CB	M-S	3.34706	weakpolar,
PDB_3SPI	A	A	LOOP11	SHEET4_4	D	260	H	227	OD2-CD2	S-S	3.94991	ionic,
PDB_3SPI	A	A	LOOP11	SHEET4_4	D	260	H	227	O-C	M-M	3.50367	carbonyl,
PDB_3SPI	A	A	LOOP11	SHEET4_4	D	260	V	228	CB-O	S-M	3.62566	weakhydrogen,
PDB_3SPI	A	A	LOOP11	SHEET4_4	D	260	V	228	O-N	M-M	2.95533	hydrogen,polar,
PDB_3SPI	A	A	LOOP11	SHEET4_4	D	260	V	228	O-CG2	M-S	3.5324	weakhydrogen,
PDB_3SPI	A	A	LOOP11	LOOP10	D	260	V	253	CB-CG2	S-S	3.63592	hydrophobic,
PDB_3SPI	A	A	LOOP11	HELIX5	D	260	F	255	OD2-CD1	S-S	3.67144	weakhydrogen,
PDB_3SPI	A	A	LOOP11	HELIX5	D	260	F	255	OD1-CA	S-M	3.36875	weakhydrogen,weakpolar,
PDB_3SPI	A	C	LOOP11	LOOP11	D	260	R	261	OD2-NH2	S-S	3.40201	ionic,polar,
PDB_3SPI	A	A	LOOP11	SHEET4_4	R	261	A	226	CA-O	M-M	3.55848	weakhydrogen,
PDB_3SPI	A	A	LOOP11	HELIX5	R	261	G	258	CD-O	S-M	2.92188	weakpolar,
PDB_3SPI	A	A	LOOP11	HELIX5	R	261	G	258	CG-O	S-M	3.48251	weakpolar,
PDB_3SPI	A	A	LOOP11	HELIX5	R	261	G	258	N-O	M-M	3.5958	hydrogen,
PDB_3SPI	A	A	LOOP11	LOOP11	R	261	L	259	N-O	M-M	3.3096	polar,
PDB_3SPI	A	D	LOOP11	LOOP11	R	261	D	260	NH2-OD2	S-S	3.40201	ionic,polar,
PDB_3SPI	A	A	LOOP11	SHEET4_4	I	262	A	226	N-O	M-M	3.14984	hydrogen,polar,
PDB_3SPI	A	A	LOOP11	SHEET4_4	I	262	A	226	CG1-CB	S-S	4.19386	hydrophobic,
PDB_3SPI	A	A	LOOP11	SHEET4_4	I	262	V	228	CD1-CG1	S-S	3.70414	hydrophobic,
PDB_3SPI	A	A	LOOP11	LOOP11	I	262	D	260	CG2-O	S-M	3.74819	weakhydrogen,
PDB_3SPI	A	D	LOOP11	SHEET43_43	I	262	R	229	O-NH2	M-S	3.44834	hydrogen,polar,
PDB_3SPI	A	D	LOOP11	SHEET43_43	I	262	R	229	O-NH1	M-S	3.55719	hydrogen,
PDB_3SPI	A	A	LOOP11	LOOP8	F	263	H	222	CE1-CD2	S-S	3.94486	pi-pi,
PDB_3SPI	A	D	LOOP11	SHEET46_46	F	263	I	298	CG-CD1	S-S	4.01353	hydrophobic,
PDB_3SPI	A	D	LOOP11	SHEET46_46	F	263	I	298	CG-CD1	S-S	4.01353	carbonpi
PDB_3SPI	A	A	LOOP11	SHEET3_3	L	264	V	215	CD1-CG2	S-S	4.18666	hydrophobic,
PDB_3SPI	A	A	LOOP11	SHEET3_3	L	264	N	217	CG-CB	S-S	4.12278	hydrophobic,
PDB_3SPI	A	A	LOOP11	SHEET3_3	L	264	N	217	CD2-CB	S-S	4.13808	hydrophobic,
PDB_3SPI	A	A	LOOP11	LOOP11	V	265	F	263	CG2-CD2	S-S	4.08669	hydrophobic,
PDB_3SPI	A	A	LOOP11	LOOP11	V	265	F	263	CG2-CD2	S-S	4.08669	carbonpi
PDB_3SPI	A	A	LOOP11	LOOP11	V	265	F	263	CG2-CE2	S-S	3.66927	hydrophobic,
PDB_3SPI	A	A	LOOP11	LOOP11	V	265	F	263	CG2-CE2	S-S	3.66927	carbonpi
PDB_3SPI	A	A	LOOP11	LOOP11	V	265	F	263	CG2-CZ	S-S	3.72746	hydrophobic,
PDB_3SPI	A	A	LOOP11	LOOP11	V	265	F	263	CG2-CZ	S-S	3.72746	carbonpi
PDB_3SPI	A	D	LOOP11	LOOP1	V	265	F	45	CG2-CZ	S-S	4.12214	hydrophobic,
PDB_3SPI	A	D	LOOP11	LOOP1	V	265	F	45	CB-CZ	S-S	3.8131	hydrophobic,
PDB_3SPI	A	D	LOOP11	LOOP1	V	265	F	45	CG1-CZ	S-S	3.8999	hydrophobic,
PDB_3SPI	A	D	LOOP11	LOOP1	V	265	C	52	CG1-CB	S-S	4.22619	hydrophobic,
PDB_3SPI	A	D	LOOP11	LOOP1	V	265	V	54	CG1-CG1	S-S	3.54851	hydrophobic,
PDB_3SPI	A	D	LOOP11	LOOP1	V	265	F	56	O-CZ	M-S	3.3223	weakhydrogen,weakpolar,
PDB_3SPI	A	A	LOOP11	LOOP11	S	266	L	264	O-CD1	M-S	3.23145	weakhydrogen,weakpolar,
PDB_3SPI	A	A	LOOP11	SHEET3_3	P	267	V	215	CA-O	M-M	2.98096	weakhydrogen,weakpolar,
PDB_3SPI	A	A	LOOP11	SHEET3_3	P	267	V	215	C-O	M-M	3.33094	carbonyl,
PDB_3SPI	A	A	LOOP11	SHEET3_3	P	267	V	215	CB-O	S-M	3.45022	weakpolar,
PDB_3SPI	A	A	SHEET6_6	SHEET3_3	I	268	R	214	O-C	M-M	3.58641	carbonyl,
PDB_3SPI	A	A	SHEET6_6	SHEET3_3	I	268	R	214	O-CA	M-M	3.37338	weakhydrogen,weakpolar,
PDB_3SPI	A	A	SHEET6_6	SHEET3_3	I	268	R	214	O-CG	M-S	3.38057	weakpolar,
PDB_3SPI	A	A	SHEET6_6	SHEET3_3	I	268	V	215	CB-CG2	S-S	4.13384	hydrophobic,
PDB_3SPI	A	A	SHEET6_6	SHEET3_3	I	268	V	215	O-CG2	M-S	3.63565	weakhydrogen,
PDB_3SPI	A	A	SHEET6_6	SHEET3_3	I	268	V	215	O-N	M-M	2.86067	hydrogen,polar,
PDB_3SPI	A	A	SHEET6_6	SHEET3_3	I	268	V	215	N-O	M-M	2.80596	hydrogen,polar,
PDB_3SPI	A	A	SHEET6_6	LOOP11	I	268	L	264	CG1-CD1	S-S	3.43848	hydrophobic,
PDB_3SPI	A	A	SHEET6_6	LOOP11	I	268	S	266	CG1-O	S-M	3.56939	weakhydrogen,
PDB_3SPI	A	A	SHEET6_6	LOOP11	I	268	S	266	CD1-O	S-M	3.42323	weakpolar,
PDB_3SPI	A	A	SHEET6_6	LOOP11	I	268	S	266	N-O	M-M	3.29837	polar,
PDB_3SPI	A	A	SHEET6_6	SHEET3_3	T	269	M	212	CG2-CB	S-S	3.75318	hydrophobic,
PDB_3SPI	A	A	SHEET6_6	SHEET3_3	T	269	M	212	CG2-SD	S-S	4.21058	hydrophobic,
PDB_3SPI	A	A	SHEET6_6	SHEET3_3	T	269	W	213	C-O	M-M	3.55182	carbonyl,
PDB_3SPI	A	A	SHEET6_6	SHEET3_3	I	270	M	212	O-CA	M-M	3.00051	weakhydrogen,weakpolar,
PDB_3SPI	A	A	SHEET6_6	SHEET3_3	I	270	M	212	O-C	M-M	3.59765	carbonyl,
PDB_3SPI	A	A	SHEET6_6	SHEET3_3	I	270	M	212	O-CB	M-S	3.31415	weakpolar,
PDB_3SPI	A	A	SHEET6_6	SHEET3_3	I	270	W	213	CG2-CH2	S-S	3.70349	hydrophobic,
PDB_3SPI	A	A	SHEET6_6	SHEET3_3	I	270	W	213	CG2-CZ2	S-S	3.26111	hydrophobic,
PDB_3SPI	A	A	SHEET6_6	SHEET3_3	I	270	W	213	CB-CE2	S-S	3.56583	carbonpi
PDB_3SPI	A	A	SHEET6_6	SHEET3_3	I	270	W	213	CB-CE2	S-S	3.56583	carbonpi
PDB_3SPI	A	A	SHEET6_6	SHEET3_3	I	270	W	213	CB-CZ2	S-S	3.78147	hydrophobic,
PDB_3SPI	A	A	SHEET6_6	SHEET3_3	I	270	W	213	CB-CZ2	S-S	3.78147	carbonpi
PDB_3SPI	A	A	SHEET6_6	SHEET3_3	I	270	W	213	CB-CZ2	S-S	3.78147	carbonpi
PDB_3SPI	A	A	SHEET6_6	SHEET3_3	I	270	W	213	N-O	M-M	2.61446	hydrogen,polar,
PDB_3SPI	A	A	SHEET6_6	SHEET3_3	I	270	W	213	CA-O	M-M	3.43781	weakpolar,
PDB_3SPI	A	A	SHEET6_6	SHEET3_3	I	270	W	213	CG1-O	S-M	3.67039	carbonpi
PDB_3SPI	A	A	SHEET6_6	SHEET3_3	I	270	W	213	CG1-NE1	S-S	3.79689	carbonpi
PDB_3SPI	A	A	SHEET6_6	SHEET3_3	I	270	W	213	O-N	M-M	3.15254	hydrogen,polar,
PDB_3SPI	A	A	SHEET6_6	SHEET3_3	I	270	W	213	CB-O	S-M	3.43945	weakpolar,
PDB_3SPI	A	A	SHEET6_6	SHEET3_3	I	270	W	213	CB-O	S-M	3.43945	carbonpi
PDB_3SPI	A	A	SHEET6_6	SHEET3_3	I	270	W	213	CB-O	S-M	3.43945	carbonpi
PDB_3SPI	A	A	SHEET6_6	SHEET3_3	I	270	W	213	CB-CD2	S-S	3.98261	hydrophobic,
PDB_3SPI	A	A	SHEET6_6	SHEET3_3	I	270	W	213	CB-CD2	S-S	3.98261	carbonpi
PDB_3SPI	A	A	SHEET6_6	SHEET3_3	I	270	W	213	CB-CD2	S-S	3.98261	carbonpi
PDB_3SPI	A	A	SHEET6_6	SHEET3_3	I	270	W	213	CB-NE1	S-S	3.73858	carbonpi
PDB_3SPI	A	A	SHEET6_6	SHEET3_3	I	270	W	213	CB-NE1	S-S	3.73858	carbonpi
PDB_3SPI	A	A	SHEET6_6	SHEET3_3	I	270	V	215	CD1-CG2	S-S	4.13149	hydrophobic,
PDB_3SPI	A	A	SHEET6_6	SHEET3_3	I	270	V	215	CG1-CG1	S-S	4.0726	hydrophobic,
PDB_3SPI	A	A	SHEET6_6	LOOP10	I	270	V	253	CG2-CG1	S-S	3.95341	hydrophobic,
PDB_3SPI	A	A	SHEET6_6	SHEET6_6	I	270	I	268	CD1-CG2	S-S	4.0914	hydrophobic,
PDB_3SPI	A	A	SHEET6_6	SHEET3_3	L	271	L	211	CA-O	M-M	3.57895	weakhydrogen,
PDB_3SPI	A	A	SHEET6_6	SHEET3_3	L	271	L	211	C-O	M-M	3.58237	carbonyl,
PDB_3SPI	A	A	SHEET6_6	SHEET3_3	L	271	M	212	CG-CG	S-S	4.04821	hydrophobic,
PDB_3SPI	A	A	SHEET6_6	SHEET3_3	L	271	M	212	CG-SD	S-S	4.17948	hydrophobic,
PDB_3SPI	A	A	SHEET6_6	SHEET6_6	L	271	T	269	CD1-O	S-M	3.10426	weakpolar,
PDB_3SPI	A	A	SHEET6_6	SHEET6_6	L	271	T	269	CD1-CG2	S-S	4.03949	hydrophobic,
PDB_3SPI	A	A	SHEET6_6	SHEET3_3	H	272	C	210	O-CA	M-M	3.09843	weakpolar,
PDB_3SPI	A	A	SHEET6_6	SHEET3_3	H	272	C	210	O-C	M-M	3.39511	carbonyl,
PDB_3SPI	A	A	SHEET6_6	SHEET3_3	H	272	C	210	O-CB	M-S	3.3908	weakpolar,
PDB_3SPI	A	A	SHEET6_6	SHEET3_3	H	272	L	211	O-N	M-M	2.7711	hydrogen,polar,
PDB_3SPI	A	A	SHEET6_6	SHEET3_3	H	272	L	211	N-O	M-M	2.68859	hydrogen,polar,
PDB_3SPI	A	A	SHEET6_6	SHEET3_3	H	272	L	211	CB-CB	S-S	4.05859	hydrophobic,
PDB_3SPI	A	A	SHEET6_6	SHEET5_5	H	272	I	251	CG-CG2	S-S	3.27049	carbonpi
PDB_3SPI	A	A	SHEET6_6	SHEET5_5	H	272	I	251	ND1-CG2	S-S	3.13924	weakpolar,
PDB_3SPI	A	A	SHEET6_6	SHEET5_5	H	272	I	251	ND1-CG2	S-S	3.13924	carbonpi
PDB_3SPI	A	A	SHEET6_6	SHEET5_5	H	272	I	251	CE1-CG2	S-S	3.61972	carbonpi
PDB_3SPI	A	A	SHEET6_6	SHEET5_5	H	272	I	251	CB-CG2	S-S	3.66147	hydrophobic,
PDB_3SPI	A	A	SHEET6_6	SHEET5_5	H	272	I	251	CB-CG2	S-S	3.66147	carbonpi
PDB_3SPI	A	A	SHEET6_6	SHEET5_5	H	272	I	251	CD2-CG2	S-S	3.81034	carbonpi
PDB_3SPI	A	A	SHEET6_6	SHEET5_5	H	272	I	251	NE2-CG2	S-S	3.98776	carbonpi
PDB_3SPI	A	A	SHEET6_6	LOOP10	H	272	D	252	ND1-O	S-M	2.99242	hydrogen,polar,
PDB_3SPI	A	A	SHEET6_6	SHEET3_3	E	273	C	210	CA-SG	M-S	3.9458	weakhydrogen,
PDB_3SPI	A	A	LOOP12	SHEET3_3	I	274	L	209	N-O	M-M	2.95231	hydrogen,polar,
PDB_3SPI	A	A	LOOP12	SHEET3_3	I	274	L	209	CB-O	S-M	3.46592	weakpolar,
PDB_3SPI	A	A	LOOP12	SHEET6_6	I	274	H	272	N-O	M-M	3.43588	polar,
PDB_3SPI	A	A	LOOP12	SHEET6_6	N	275	E	273	ND2-OE2	S-S	3.5417	hydrogen,
PDB_3SPI	A	A	LOOP12	SHEET6_6	N	275	E	273	N-O	M-M	3.39194	polar,
PDB_3SPI	A	A	LOOP12	LOOP12	D	277	N	275	N-OD1	M-S	3.05453	hydrogen,polar,
PDB_3SPI	A	A	LOOP12	LOOP12	D	277	N	275	N-O	M-M	2.9801	polar,
PDB_3SPI	A	A	LOOP12	SHEET6_6	S	278	H	272	CB-NE2	S-S	3.46576	weakpolar,
PDB_3SPI	A	A	LOOP12	SHEET6_6	S	278	H	272	OG-NE2	S-S	2.67139	polar,
PDB_3SPI	A	A	LOOP12	LOOP12	S	278	I	274	OG-CG2	S-S	3.68901	weakhydrogen,
PDB_3SPI	A	A	LOOP12	LOOP12	S	278	N	275	N-OD1	M-S	3.22372	hydrogen,polar,
PDB_3SPI	A	A	LOOP12	LOOP12	S	278	N	275	N-O	M-M	2.77228	hydrogen,polar,
PDB_3SPI	A	A	LOOP12	LOOP12	S	278	N	275	CA-O	M-M	3.46623	weakpolar,
PDB_3SPI	A	A	LOOP12	LOOP12	S	278	N	275	CB-O	S-M	3.21162	weakhydrogen,weakpolar,
PDB_3SPI	A	A	LOOP12	LOOP12	S	278	E	276	N-O	M-M	3.47814	polar,
PDB_3SPI	A	A	LOOP12	SHEET4_4	P	279	L	232	CB-CD1	S-S	3.6503	hydrophobic,
PDB_3SPI	A	A	LOOP12	SHEET4_4	P	279	L	232	CG-CD1	S-S	4.09163	hydrophobic,
PDB_3SPI	A	A	LOOP12	SHEET5_5	P	279	I	249	CB-CG2	S-S	3.9064	hydrophobic,
PDB_3SPI	A	A	LOOP12	SHEET5_5	P	279	I	249	CG-CG2	S-S	3.98692	hydrophobic,
PDB_3SPI	A	A	LOOP12	SHEET3_3	L	280	L	211	CD1-CD2	S-S	3.70359	hydrophobic,
PDB_3SPI	A	A	LOOP12	SHEET4_4	L	280	L	232	CD2-CD1	S-S	3.48477	hydrophobic,
PDB_3SPI	A	A	LOOP12	LOOP12	L	280	I	274	CB-CG2	S-S	4.13021	hydrophobic,
PDB_3SPI	A	A	LOOP12	LOOP12	L	280	S	278	N-O	M-M	3.27092	polar,
PDB_3SPI	A	A	LOOP12	LOOP12	L	280	S	278	N-OG	M-S	3.15587	hydrogen,polar,
PDB_3SPI	A	A	LOOP12	LOOP12	F	281	N	275	CB-O	S-M	3.22257	weakpolar,
PDB_3SPI	A	A	LOOP12	LOOP12	F	281	N	275	CG-O	S-M	3.11654	weakpolar,
PDB_3SPI	A	A	LOOP12	LOOP12	F	281	N	275	CD1-O	S-M	2.91543	weakpolar,
PDB_3SPI	A	A	LOOP12	LOOP12	F	281	E	276	CE1-N	S-M	3.60694	donorpi
PDB_3SPI	A	A	LOOP12	LOOP12	F	281	E	276	CD2-CA	S-M	4.03186	carbonpi
PDB_3SPI	A	A	LOOP12	LOOP12	F	281	E	276	CE1-CA	S-M	4.00821	carbonpi
PDB_3SPI	A	A	LOOP12	LOOP12	F	281	E	276	CE2-CA	S-M	4.01505	carbonpi
PDB_3SPI	A	A	LOOP12	LOOP12	F	281	E	276	CZ-CA	S-M	4.00299	carbonpi
PDB_3SPI	A	A	LOOP12	LOOP12	F	281	E	276	CD1-N	S-M	3.65506	donorpi
PDB_3SPI	A	A	LOOP12	LOOP12	F	281	E	276	CG-CA	S-M	4.04759	carbonpi
PDB_3SPI	A	A	LOOP12	LOOP12	F	281	E	276	CD1-CA	S-M	4.02433	carbonpi
PDB_3SPI	A	A	LOOP12	LOOP12	F	281	S	278	N-O	M-M	3.13163	hydrogen,polar,
PDB_3SPI	A	A	LOOP12	LOOP12	F	281	S	278	CB-O	S-M	3.13459	weakpolar,
PDB_3SPI	A	A	LOOP12	LOOP12	G	282	L	280	N-O	M-M	3.15071	polar,
PDB_3SPI	A	A	LOOP12	LOOP12	I	283	L	280	N-O	M-M	2.97951	hydrogen,polar,
PDB_3SPI	A	A	LOOP12	LOOP12	I	283	L	280	CB-O	S-M	3.45018	weakhydrogen,weakpolar,
PDB_3SPI	A	A	LOOP12	LOOP12	I	283	L	280	CD1-CD2	S-S	3.9695	hydrophobic,
PDB_3SPI	A	A	LOOP12	LOOP12	I	283	F	281	N-O	M-M	3.43208	polar,
PDB_3SPI	A	A	HELIX6	HELIX6	Q	286	S	284	N-O	M-M	3.20004	polar,
PDB_3SPI	A	A	HELIX6	LOOP12	D	287	I	283	CB-CG2	S-S	3.71528	hydrophobic,
PDB_3SPI	A	A	HELIX6	HELIX6	D	287	S	284	OD2-N	S-M	2.97078	hydrogen,polar,
PDB_3SPI	A	A	HELIX6	HELIX6	D	287	S	284	N-O	M-M	3.04221	hydrogen,polar,
PDB_3SPI	A	A	HELIX6	HELIX6	D	287	S	284	CB-O	S-M	3.42314	weakhydrogen,weakpolar,
PDB_3SPI	A	A	HELIX6	HELIX6	D	287	S	284	OD2-CB	S-S	3.44883	weakpolar,
PDB_3SPI	A	A	HELIX6	HELIX6	D	287	S	284	OD2-OG	S-S	2.56071	polar,
PDB_3SPI	A	A	HELIX6	HELIX6	L	288	S	284	N-O	M-M	3.35243	hydrogen,polar,
PDB_3SPI	A	A	HELIX6	HELIX6	L	288	R	285	N-O	M-M	3.34392	hydrogen,polar,
PDB_3SPI	A	A	HELIX6	HELIX6	L	288	R	285	CB-O	S-M	3.29753	weakpolar,
PDB_3SPI	A	A	HELIX6	HELIX6	L	288	Q	286	N-O	M-M	3.17948	polar,
PDB_3SPI	A	A	HELIX6	HELIX6	E	289	Q	286	N-O	M-M	3.43735	hydrogen,polar,
PDB_3SPI	A	A	HELIX6	HELIX6	E	289	Q	286	CG-O	S-M	3.14848	weakhydrogen,weakpolar,
PDB_3SPI	A	A	LOOP13	HELIX6	T	290	Q	286	OG1-O	S-M	3.48023	polar,
PDB_3SPI	A	A	LOOP13	HELIX6	T	290	D	287	N-O	M-M	3.59342	hydrogen,
PDB_3SPI	A	A	LOOP13	HELIX6	D	291	D	287	OD2-CB	S-S	3.69928	weakhydrogen,
PDB_3SPI	A	A	LOOP13	HELIX6	D	291	D	287	CB-O	S-M	3.04695	weakhydrogen,weakpolar,
PDB_3SPI	A	A	LOOP13	HELIX6	D	291	D	287	N-O	M-M	2.91297	hydrogen,polar,
PDB_3SPI	A	A	LOOP13	SHEET4_4	F	293	L	232	CB-CD2	S-S	4.14661	hydrophobic,
PDB_3SPI	A	A	LOOP13	SHEET4_4	F	293	K	234	CB-CB	S-S	3.8475	hydrophobic,
PDB_3SPI	A	A	LOOP13	SHEET4_4	F	293	K	234	CB-CD	S-S	4.08921	hydrophobic,
PDB_3SPI	A	A	LOOP13	LOOP12	F	293	I	283	CE2-CD1	S-S	3.96584	hydrophobic,
PDB_3SPI	A	A	LOOP13	HELIX6	F	293	L	288	CZ-CD1	S-S	3.94309	hydrophobic,
PDB_3SPI	A	A	LOOP13	LOOP13	F	293	D	291	CD2-CB	S-S	3.97715	hydrophobic,
PDB_3SPI	A	A	LOOP13	LOOP13	F	293	D	291	CE2-CB	S-S	4.08707	hydrophobic,
PDB_3SPI	A	A	SHEET7_7	LOOP1	E	294	R	44	OE2-NE	S-S	3.87028	ionic,
PDB_3SPI	A	A	SHEET7_7	LOOP1	E	294	F	45	OE1-N	S-M	2.95737	hydrogen,polar,
PDB_3SPI	A	A	SHEET7_7	LOOP1	E	294	F	45	OE1-CB	S-S	3.415	weakpolar,
PDB_3SPI	A	A	SHEET7_7	LOOP1	E	294	V	46	OE2-N	S-M	3.11851	hydrogen,polar,
PDB_3SPI	A	A	SHEET7_7	SHEET4_4	E	294	L	232	O-CA	M-M	3.44757	weakhydrogen,weakpolar,
PDB_3SPI	A	A	SHEET7_7	SHEET4_4	E	294	L	232	O-C	M-M	3.48954	carbonyl,
PDB_3SPI	A	A	SHEET7_7	SHEET4_4	E	294	I	233	O-N	M-M	2.63712	hydrogen,polar,
PDB_3SPI	A	A	SHEET7_7	SHEET4_4	E	294	I	233	N-O	M-M	2.96943	hydrogen,polar,
PDB_3SPI	A	A	SHEET7_7	SHEET4_4	I	295	Q	231	CA-O	M-M	3.37649	weakhydrogen,weakpolar,
PDB_3SPI	A	A	SHEET7_7	SHEET4_4	I	295	Q	231	C-O	M-M	3.53142	carbonyl,
PDB_3SPI	A	A	SHEET7_7	SHEET4_4	I	295	L	232	CD1-CB	S-S	3.8163	hydrophobic,
PDB_3SPI	A	A	SHEET7_7	SHEET4_4	I	295	L	232	CD1-CG	S-S	3.65912	hydrophobic,
PDB_3SPI	A	A	SHEET7_7	SHEET5_5	I	295	I	251	CG2-CD1	S-S	3.49747	hydrophobic,
PDB_3SPI	A	A	SHEET7_7	SHEET5_5	I	295	I	251	CD1-CD1	S-S	3.5357	hydrophobic,
PDB_3SPI	A	A	SHEET7_7	LOOP13	I	295	F	293	CD1-CD1	S-S	4.04312	hydrophobic,
PDB_3SPI	A	A	SHEET7_7	LOOP13	I	295	F	293	CG1-CE1	S-S	3.89783	hydrophobic,
PDB_3SPI	A	A	SHEET7_7	LOOP13	I	295	F	293	CD1-CE1	S-S	3.8454	hydrophobic,
PDB_3SPI	A	A	SHEET7_7	SHEET4_4	V	296	A	230	O-CA	M-M	3.28971	weakhydrogen,weakpolar,
PDB_3SPI	A	A	SHEET7_7	SHEET4_4	V	296	A	230	O-C	M-M	3.56468	carbonyl,
PDB_3SPI	A	A	SHEET7_7	SHEET4_4	V	296	Q	231	O-N	M-M	2.93407	hydrogen,polar,
PDB_3SPI	A	A	SHEET7_7	SHEET4_4	V	296	Q	231	N-O	M-M	2.74758	hydrogen,polar,
PDB_3SPI	A	A	SHEET7_7	SHEET4_4	V	296	I	233	CG2-CG1	S-S	3.67451	hydrophobic,
PDB_3SPI	A	A	SHEET7_7	SHEET1_1	V	297	F	196	CB-CE1	S-S	3.78943	hydrophobic,
PDB_3SPI	A	A	SHEET7_7	SHEET1_1	V	297	F	196	CG2-CE1	S-S	3.35116	hydrophobic,
PDB_3SPI	A	A	SHEET7_7	SHEET1_1	V	297	F	196	CG2-CZ	S-S	4.02774	hydrophobic,
PDB_3SPI	A	A	SHEET7_7	SHEET1_1	V	297	F	196	CG2-CD1	S-S	3.48945	hydrophobic,
PDB_3SPI	A	A	SHEET7_7	SHEET3_3	V	297	W	213	CG1-CE2	S-S	3.51425	carbonpi
PDB_3SPI	A	A	SHEET7_7	SHEET3_3	V	297	W	213	CG1-CZ2	S-S	3.92344	hydrophobic,
PDB_3SPI	A	A	SHEET7_7	SHEET3_3	V	297	W	213	CG1-CZ2	S-S	3.92344	carbonpi
PDB_3SPI	A	A	SHEET7_7	SHEET3_3	V	297	W	213	CG1-CG	S-S	4.09844	hydrophobic,
PDB_3SPI	A	A	SHEET7_7	SHEET3_3	V	297	W	213	CG1-CG	S-S	4.09844	carbonpi
PDB_3SPI	A	A	SHEET7_7	SHEET3_3	V	297	W	213	CG1-CD1	S-S	3.86967	carbonpi
PDB_3SPI	A	A	SHEET7_7	SHEET3_3	V	297	W	213	CG1-CD2	S-S	3.8856	hydrophobic,
PDB_3SPI	A	A	SHEET7_7	SHEET3_3	V	297	W	213	CG1-CD2	S-S	3.8856	carbonpi
PDB_3SPI	A	A	SHEET7_7	SHEET3_3	V	297	W	213	CG1-NE1	S-S	3.51021	carbonpi
PDB_3SPI	A	A	SHEET7_7	SHEET4_4	V	297	R	229	CA-O	M-M	3.70114	weakhydrogen,
PDB_3SPI	A	A	SHEET7_7	SHEET4_4	I	298	V	228	O-CA	M-M	3.39075	weakpolar,
PDB_3SPI	A	A	SHEET7_7	SHEET4_4	I	298	R	229	O-N	M-M	3.16763	hydrogen,polar,
PDB_3SPI	A	A	SHEET7_7	SHEET4_4	I	298	R	229	N-O	M-M	2.89296	hydrogen,polar,
PDB_3SPI	A	C	SHEET7_7	LOOP11	I	298	F	263	CD1-CG	S-S	4.01353	hydrophobic,
PDB_3SPI	A	C	SHEET7_7	LOOP11	I	298	F	263	CD1-CG	S-S	4.01353	carbonpi
PDB_3SPI	A	A	SHEET7_7	SHEET1_1	L	299	F	196	CB-CZ	S-S	3.97011	hydrophobic,
PDB_3SPI	A	A	SHEET7_7	SHEET4_4	L	299	H	227	CA-O	M-M	3.7016	weakhydrogen,
PDB_3SPI	A	A	SHEET7_7	SHEET4_4	L	299	H	227	CD1-O	S-M	3.24331	weakhydrogen,weakpolar,
PDB_3SPI	A	A	SHEET7_7	SHEET4_4	L	299	V	228	CD1-CG1	S-S	3.68598	hydrophobic,
PDB_3SPI	A	A	SHEET7_7	LOOP11	L	299	I	262	CD1-CD1	S-S	3.97184	hydrophobic,
PDB_3SPI	A	A	SHEET7_7	LOOP11	L	299	L	264	CD2-CD2	S-S	4.20094	hydrophobic,
PDB_3SPI	A	A	SHEET7_7	SHEET4_4	E	300	A	226	O-CA	M-M	3.09098	weakhydrogen,weakpolar,
PDB_3SPI	A	A	SHEET7_7	SHEET4_4	E	300	A	226	O-C	M-M	3.41295	carbonyl,
PDB_3SPI	A	A	SHEET7_7	SHEET4_4	E	300	H	227	O-N	M-M	2.79118	hydrogen,polar,
PDB_3SPI	A	A	SHEET7_7	SHEET4_4	E	300	H	227	N-O	M-M	2.93104	hydrogen,polar,
PDB_3SPI	A	A	SHEET7_7	SHEET4_4	E	300	H	227	OE1-CD2	S-S	3.56825	ionic,
PDB_3SPI	A	A	SHEET7_7	SHEET4_4	E	300	H	227	OE1-CE1	S-S	3.38466	ionic,
PDB_3SPI	A	A	SHEET7_7	SHEET4_4	E	300	H	227	OE1-NE2	S-S	2.73009	ionic,polar,
PDB_3SPI	A	A	SHEET7_7	SHEET4_4	E	300	R	229	OE2-NH1	S-S	3.45266	hydrogen,ionic,polar,
PDB_3SPI	A	A	SHEET7_7	SHEET4_4	E	300	R	229	OE1-CD	S-S	3.18947	weakpolar,
PDB_3SPI	A	A	SHEET7_7	SHEET7_7	E	300	I	298	CG-CG2	S-S	3.82563	hydrophobic,
PDB_3SPI	A	C	SHEET7_7	SHEET30_30	E	300	E	225	OE2-N	S-M	3.56683	hydrogen,
PDB_3SPI	A	C	SHEET7_7	SHEET30_30	E	300	E	225	CB-CG	S-S	4.19378	hydrophobic,
PDB_3SPI	A	C	SHEET7_7	SHEET30_30	E	300	E	225	CG-CG	S-S	4.13005	hydrophobic,
PDB_3SPI	A	A	SHEET7_7	SHEET4_4	M	302	I	223	O-CA	M-M	3.53762	weakhydrogen,
PDB_3SPI	A	A	SHEET7_7	SHEET4_4	M	302	V	224	N-O	M-M	2.85661	hydrogen,polar,
PDB_3SPI	A	A	SHEET7_7	SHEET4_4	M	302	V	224	CB-CB	S-S	4.0313	hydrophobic,
PDB_3SPI	A	A	SHEET7_7	SHEET4_4	M	302	V	224	O-N	M-M	2.9094	hydrogen,polar,
PDB_3SPI	A	D	SHEET7_7	SHEET47_47	M	302	T	309	SD-OG1	S-S	3.32667	polar,
PDB_3SPI	A	A	SHEET7_7	HELIX4	V	303	R	190	CG2-CB	S-S	3.50485	hydrophobic,
PDB_3SPI	A	A	SHEET7_7	HELIX4	V	303	R	190	CG2-CG	S-S	3.65486	hydrophobic,
PDB_3SPI	A	A	LOOP14	LOOP8	E	304	S	221	OE1-CA	S-M	3.47411	weakpolar,
PDB_3SPI	A	A	LOOP14	LOOP8	E	304	H	222	CB-O	S-M	3.1637	weakhydrogen,weakpolar,
PDB_3SPI	A	A	LOOP14	LOOP8	E	304	H	222	N-O	M-M	3.43927	hydrogen,polar,
PDB_3SPI	A	A	LOOP14	LOOP8	E	304	H	222	OE1-N	S-M	3.18726	hydrogen,polar,
PDB_3SPI	A	A	LOOP14	LOOP8	E	304	H	222	OE2-ND1	S-S	3.8461	ionic,
PDB_3SPI	A	A	LOOP14	SHEET4_4	E	304	V	224	CG-CG2	S-S	4.22714	hydrophobic,
PDB_3SPI	A	A	LOOP14	SHEET7_7	E	304	M	302	N-O	M-M	3.13592	polar,
PDB_3SPI	A	A	LOOP14	SHEET7_7	A	305	V	303	N-O	M-M	3.17075	polar,
PDB_3SPI	A	D	LOOP14	HELIX28	A	305	R	186	CB-CG	S-S	3.95553	hydrophobic,
PDB_3SPI	A	D	LOOP14	HELIX28	A	305	P	187	O-CD	M-S	2.938	weakpolar,
PDB_3SPI	A	A	LOOP14	SHEET7_7	T	306	V	303	N-O	M-M	3.34089	polar,
PDB_3SPI	A	A	LOOP14	SHEET7_7	T	306	V	303	OG1-CB	S-S	3.63921	weakhydrogen,
PDB_3SPI	A	D	LOOP14	LOOP14	T	306	M	308	O-CE	M-S	3.17275	weakpolar,
PDB_3SPI	A	A	LOOP14	SHEET7_7	A	307	V	303	CA-O	M-M	3.10215	weakpolar,
PDB_3SPI	A	A	LOOP14	SHEET7_7	A	307	V	303	N-O	M-M	2.58955	hydrogen,polar,
PDB_3SPI	A	D	LOOP14	LOOP14	A	307	M	308	CB-CB	S-S	3.73394	hydrophobic,
PDB_3SPI	A	A	LOOP14	HELIX4	M	308	P	187	CB-CB	S-S	3.72687	hydrophobic,
PDB_3SPI	A	A	LOOP14	HELIX4	M	308	P	187	CB-CG	S-S	4.03838	hydrophobic,
PDB_3SPI	A	A	LOOP14	HELIX4	M	308	P	187	CE-CG	S-S	4.18938	hydrophobic,
PDB_3SPI	A	A	LOOP14	SHEET7_7	M	308	M	302	O-CA	M-M	3.69698	weakhydrogen,
PDB_3SPI	A	A	LOOP14	SHEET7_7	M	308	V	303	O-N	M-M	3.10412	hydrogen,polar,
PDB_3SPI	A	A	LOOP14	SHEET7_7	M	308	V	303	O-CG2	M-S	3.64121	weakhydrogen,
PDB_3SPI	A	A	LOOP14	LOOP14	M	308	T	306	CG-O	S-M	3.34993	weakhydrogen,weakpolar,
PDB_3SPI	A	A	LOOP14	LOOP14	M	308	T	306	N-O	M-M	3.13469	polar,
PDB_3SPI	A	A	LOOP14	LOOP14	M	308	T	306	CG-OG1	S-S	3.312	weakpolar,
PDB_3SPI	A	A	LOOP14	LOOP14	M	308	T	306	SD-OG1	S-S	3.40719	polar,
PDB_3SPI	A	A	LOOP14	LOOP14	M	308	T	306	SD-CG2	S-S	4.20652	hydrophobic,
PDB_3SPI	A	C	LOOP14	LOOP14	M	308	T	306	CE-O	S-M	3.17275	weakpolar,
PDB_3SPI	A	C	LOOP14	LOOP14	M	308	A	307	CB-CB	S-S	3.73394	hydrophobic,
PDB_3SPI	A	A	SHEET8_8	SHEET7_7	T	309	G	301	CG2-O	S-M	3.35131	weakpolar,
PDB_3SPI	A	A	SHEET8_8	SHEET7_7	T	309	G	301	CA-O	M-M	2.98775	weakhydrogen,weakpolar,
PDB_3SPI	A	A	SHEET8_8	SHEET7_7	T	309	G	301	C-O	M-M	3.32911	carbonyl,
PDB_3SPI	A	C	SHEET8_8	SHEET30_30	T	309	V	224	CG2-CG1	S-S	3.49531	hydrophobic,
PDB_3SPI	A	C	SHEET8_8	SHEET30_30	T	309	E	225	CG2-OE1	S-S	3.48807	weakpolar,
PDB_3SPI	A	C	SHEET8_8	SHEET33_33	T	309	M	302	OG1-SD	S-S	3.32667	polar,
PDB_3SPI	A	A	SHEET8_8	HELIX4	T	310	P	187	CB-O	S-M	3.20394	weakpolar,
PDB_3SPI	A	A	SHEET8_8	HELIX4	T	310	P	187	OG1-O	S-M	2.85876	polar,
PDB_3SPI	A	A	SHEET8_8	HELIX4	T	310	K	188	OG1-CA	S-M	3.62708	weakhydrogen,
PDB_3SPI	A	A	SHEET8_8	HELIX4	T	310	A	191	OG1-CB	S-S	3.8156	weakhydrogen,
PDB_3SPI	A	A	SHEET8_8	SHEET7_7	T	310	E	300	O-CA	M-M	3.51048	weakhydrogen,
PDB_3SPI	A	A	SHEET8_8	SHEET7_7	T	310	G	301	O-N	M-M	3.21673	hydrogen,polar,
PDB_3SPI	A	A	SHEET8_8	SHEET7_7	T	310	G	301	N-O	M-M	2.72614	hydrogen,polar,
PDB_3SPI	A	A	SHEET8_8	LOOP14	T	310	M	308	N-O	M-M	3.25299	polar,
PDB_3SPI	A	A	SHEET8_8	SHEET7_7	Q	311	I	298	CG-CG2	S-S	3.71128	hydrophobic,
PDB_3SPI	A	A	SHEET8_8	SHEET7_7	Q	311	L	299	CA-O	M-M	3.54998	weakhydrogen,
PDB_3SPI	A	A	SHEET8_8	SHEET7_7	Q	311	E	300	NE2-OE2	S-S	3.00789	hydrogen,polar,
PDB_3SPI	A	A	SHEET8_8	SHEET7_7	Q	311	E	300	CB-CG	S-S	4.02852	hydrophobic,
PDB_3SPI	A	A	SHEET8_8	SHEET7_7	Q	311	E	300	CG-CG	S-S	3.66805	hydrophobic,
PDB_3SPI	A	C	SHEET8_8	SHEET30_30	Q	311	V	224	CB-CG1	S-S	4.05526	hydrophobic,
PDB_3SPI	A	C	SHEET8_8	SHEET30_30	Q	311	V	224	CB-CG2	S-S	4.07677	hydrophobic,
PDB_3SPI	A	A	SHEET8_8	HELIX4	A	312	A	191	CB-CB	S-S	4.03853	hydrophobic,
PDB_3SPI	A	A	SHEET8_8	SHEET1_1	A	312	L	194	CB-CD1	S-S	4.12417	hydrophobic,
PDB_3SPI	A	A	SHEET8_8	SHEET1_1	A	312	F	196	CB-CE2	S-S	4.10624	hydrophobic,
PDB_3SPI	A	A	SHEET8_8	SHEET7_7	A	312	I	298	O-CA	M-M	3.38448	weakhydrogen,weakpolar,
PDB_3SPI	A	A	SHEET8_8	SHEET7_7	A	312	I	298	O-C	M-M	3.59369	carbonyl,
PDB_3SPI	A	A	SHEET8_8	SHEET7_7	A	312	L	299	N-O	M-M	2.85818	hydrogen,polar,
PDB_3SPI	A	A	SHEET8_8	SHEET7_7	A	312	L	299	O-N	M-M	2.87221	hydrogen,polar,
PDB_3SPI	A	A	SHEET8_8	LOOP1	R	313	G	50	NE-O	S-M	3.15429	polar,
PDB_3SPI	A	A	SHEET8_8	LOOP1	R	313	G	50	NH2-O	S-M	3.45684	hydrogen,polar,
PDB_3SPI	A	A	SHEET8_8	LOOP1	R	313	G	50	O-CA	M-M	3.31927	weakpolar,
PDB_3SPI	A	A	SHEET8_8	SHEET7_7	R	313	V	297	CA-O	M-M	3.34732	weakhydrogen,weakpolar,
PDB_3SPI	A	A	SHEET8_8	SHEET7_7	R	313	I	298	CG-CG1	S-S	3.9268	hydrophobic,
PDB_3SPI	A	C	SHEET8_8	LOOP8	R	313	H	222	NH1-CG	S-S	3.97072	cationpi
PDB_3SPI	A	C	SHEET8_8	LOOP8	R	313	H	222	NH1-CE1	S-S	3.65682	cationpi
PDB_3SPI	A	C	SHEET8_8	LOOP8	R	313	H	222	NH1-ND1	S-S	3.55337	cationpi
PDB_3SPI	A	A	SHEET8_8	LOOP1	S	314	K	48	OG-O	S-M	3.19213	hydrogen,polar,
PDB_3SPI	A	A	SHEET8_8	SHEET1_1	S	314	F	196	CB-CG	S-S	3.74015	carbonpi
PDB_3SPI	A	A	SHEET8_8	SHEET1_1	S	314	F	196	CB-CD2	S-S	3.72149	carbonpi
PDB_3SPI	A	A	SHEET8_8	SHEET1_1	S	314	F	196	CB-CB	S-S	3.9046	carbonpi
PDB_3SPI	A	A	SHEET8_8	SHEET7_7	S	314	V	297	O-N	M-M	3.07163	hydrogen,polar,
PDB_3SPI	A	A	SHEET8_8	SHEET7_7	S	314	V	297	N-O	M-M	3.13941	hydrogen,polar,
PDB_3SPI	A	A	SHEET8_8	SHEET7_7	S	314	V	297	O-CG2	M-S	3.43022	weakhydrogen,weakpolar,
PDB_3SPI	A	A	SHEET8_8	LOOP1	S	315	R	44	OG-NH2	S-S	2.67807	hydrogen,polar,
PDB_3SPI	A	A	SHEET8_8	LOOP1	S	315	R	44	O-NH2	M-S	2.87718	hydrogen,polar,
PDB_3SPI	A	A	SHEET8_8	LOOP1	S	315	R	44	OG-NE	S-S	3.11404	polar,
PDB_3SPI	A	A	SHEET8_8	LOOP1	S	315	V	46	CB-O	S-M	3.08653	weakpolar,
PDB_3SPI	A	A	SHEET8_8	LOOP1	S	315	V	46	OG-O	S-M	3.49019	polar,
PDB_3SPI	A	A	SHEET8_8	LOOP1	S	315	K	48	O-CD	M-S	3.15209	weakpolar,
PDB_3SPI	A	A	SHEET8_8	LOOP1	S	315	K	48	O-NZ	M-S	2.88204	hydrogen,polar,
PDB_3SPI	A	A	SHEET8_8	SHEET7_7	S	315	E	294	CB-OE2	S-S	3.354	weakpolar,
PDB_3SPI	A	A	SHEET8_8	SHEET7_7	S	315	E	294	OG-OE2	S-S	2.52042	polar,
PDB_3SPI	A	A	SHEET8_8	SHEET7_7	S	315	E	294	OG-CG	S-S	3.00101	weakpolar,
PDB_3SPI	A	A	SHEET8_8	SHEET7_7	S	315	I	295	CA-O	M-M	3.31085	weakhydrogen,weakpolar,
PDB_3SPI	A	A	SHEET8_8	SHEET7_7	S	315	I	295	C-O	M-M	3.52974	carbonyl,
PDB_3SPI	A	A	SHEET8_8	SHEET7_7	S	315	I	295	OG-O	S-M	3.39993	hydrogen,polar,
PDB_3SPI	A	A	SHEET8_8	SHEET1_1	Y	316	F	196	OH-CB	S-S	3.85367	weakhydrogen,
PDB_3SPI	A	A	SHEET8_8	LOOP6	Y	316	S	197	CE1-O	S-M	2.99748	weakpolar,
PDB_3SPI	A	A	SHEET8_8	LOOP6	Y	316	S	197	OH-N	S-M	3.40631	polar,
PDB_3SPI	A	A	SHEET8_8	LOOP6	Y	316	S	197	OH-O	S-M	2.61319	polar,
PDB_3SPI	A	A	SHEET8_8	LOOP6	Y	316	S	197	OH-OG	S-S	2.94116	hydrogen,polar,
PDB_3SPI	A	A	SHEET8_8	LOOP6	Y	316	N	199	CE1-O	S-M	3.48708	weakpolar,
PDB_3SPI	A	A	SHEET8_8	SHEET2_2	Y	316	A	200	CD2-CB	S-S	3.86202	hydrophobic,
PDB_3SPI	A	A	SHEET8_8	SHEET2_2	Y	316	A	200	CD2-CB	S-S	3.86202	carbonpi
PDB_3SPI	A	A	SHEET8_8	SHEET2_2	Y	316	A	200	CE2-CB	S-S	4.11444	hydrophobic,
PDB_3SPI	A	A	SHEET8_8	SHEET2_2	Y	316	A	200	CE2-CB	S-S	4.11444	carbonpi
PDB_3SPI	A	A	SHEET8_8	SHEET2_2	Y	316	A	200	CG-CB	S-S	3.7486	hydrophobic,
PDB_3SPI	A	A	SHEET8_8	SHEET2_2	Y	316	A	200	CG-CB	S-S	3.7486	carbonpi
PDB_3SPI	A	A	SHEET8_8	SHEET2_2	Y	316	A	200	CD1-CB	S-S	3.88254	hydrophobic,
PDB_3SPI	A	A	SHEET8_8	SHEET2_2	Y	316	A	200	CD1-CB	S-S	3.88254	carbonpi
PDB_3SPI	A	A	SHEET8_8	SHEET3_3	Y	316	W	213	CE2-CG	S-S	3.99445	hydrophobic,pi-pi,
PDB_3SPI	A	A	SHEET8_8	SHEET3_3	Y	316	W	213	CE2-CB	S-S	3.66917	hydrophobic,
PDB_3SPI	A	A	SHEET8_8	SHEET3_3	Y	316	W	213	OH-CB	S-S	3.54995	weakhydrogen,
PDB_3SPI	A	A	SHEET8_8	SHEET7_7	Y	316	I	295	O-N	M-M	2.77431	hydrogen,polar,
PDB_3SPI	A	A	SHEET8_8	SHEET7_7	Y	316	I	295	N-O	M-M	2.80216	hydrogen,polar,
PDB_3SPI	A	A	SHEET8_8	SHEET7_7	Y	316	V	297	CD2-CG1	S-S	4.12076	hydrophobic,
PDB_3SPI	A	A	SHEET8_8	SHEET7_7	Y	316	V	297	CE2-CG1	S-S	3.89147	hydrophobic,
PDB_3SPI	A	A	SHEET8_8	SHEET7_7	Y	316	V	297	CE2-CG2	S-S	3.81621	hydrophobic,
PDB_3SPI	A	A	SHEET8_8	LOOP1	L	317	R	44	CD2-CB	S-S	4.23973	hydrophobic,
PDB_3SPI	A	A	SHEET8_8	SHEET7_7	L	317	E	294	CD2-CG	S-S	3.95709	hydrophobic,
PDB_3SPI	A	A	SHEET8_8	SHEET7_7	L	317	E	294	CD2-CB	S-S	4.17037	hydrophobic,
PDB_3SPI	A	A	LOOP15	HELIX6	A	318	L	288	O-CG	M-S	3.32553	weakhydrogen,weakpolar,
PDB_3SPI	A	A	LOOP15	HELIX6	A	318	L	288	CB-CD1	S-S	3.91855	hydrophobic,
PDB_3SPI	A	A	LOOP15	LOOP13	A	318	F	293	CB-CE1	S-S	4.06523	hydrophobic,
PDB_3SPI	A	A	LOOP15	LOOP13	A	318	F	293	CB-CE1	S-S	4.06523	carbonpi
PDB_3SPI	A	A	LOOP15	LOOP13	A	318	F	293	CA-CZ	M-S	4.06894	carbonpi
PDB_3SPI	A	A	LOOP15	LOOP13	A	318	F	293	CB-CZ	S-S	3.60486	hydrophobic,
PDB_3SPI	A	A	LOOP15	LOOP13	A	318	F	293	CB-CZ	S-S	3.60486	carbonpi
PDB_3SPI	A	A	LOOP15	LOOP13	A	318	F	293	CB-CD2	S-S	3.94321	hydrophobic,
PDB_3SPI	A	A	LOOP15	LOOP13	A	318	F	293	CB-CD2	S-S	3.94321	carbonpi
PDB_3SPI	A	A	LOOP15	LOOP13	A	318	F	293	CB-CE2	S-S	3.53559	hydrophobic,
PDB_3SPI	A	A	LOOP15	LOOP13	A	318	F	293	CB-CE2	S-S	3.53559	carbonpi
PDB_3SPI	A	A	LOOP15	LOOP13	A	318	F	293	N-O	M-M	3.3982	hydrogen,polar,
PDB_3SPI	A	A	LOOP15	SHEET8_8	S	319	L	317	N-O	M-M	2.87851	polar,
PDB_3SPI	A	A	LOOP15	LOOP1	E	320	R	44	OE1-NH2	S-S	2.74662	hydrogen,ionic,polar,
PDB_3SPI	A	A	LOOP15	LOOP1	E	320	R	44	OE2-NH2	S-S	3.77045	ionic,
PDB_3SPI	A	A	LOOP15	LOOP1	E	320	R	44	OE1-CZ	S-S	3.4251	ionic,
PDB_3SPI	A	A	LOOP15	LOOP1	E	320	R	44	OE2-CZ	S-S	3.64351	ionic,
PDB_3SPI	A	A	LOOP15	LOOP1	E	320	R	44	OE1-NH1	S-S	3.28472	hydrogen,ionic,polar,
PDB_3SPI	A	A	LOOP15	LOOP1	E	320	R	44	OE2-NH1	S-S	2.73736	hydrogen,ionic,polar,
PDB_3SPI	A	A	LOOP15	LOOP1	E	320	K	48	OE1-NZ	S-S	3.34143	hydrogen,ionic,polar,
PDB_3SPI	A	A	LOOP15	LOOP1	E	320	K	48	OE2-CD	S-S	3.79803	weakhydrogen,
PDB_3SPI	A	A	LOOP15	LOOP6	E	320	N	199	O-CB	M-S	3.3908	weakhydrogen,weakpolar,
PDB_3SPI	A	A	LOOP15	LOOP6	E	320	N	199	O-ND2	M-S	3.19436	hydrogen,polar,
PDB_3SPI	A	A	LOOP15	SHEET2_2	E	320	A	200	O-N	M-M	3.56526	hydrogen,
PDB_3SPI	A	A	LOOP15	SHEET8_8	E	320	Y	316	OE1-CA	S-M	3.14651	weakhydrogen,weakpolar,
PDB_3SPI	A	A	LOOP15	SHEET8_8	E	320	L	317	OE1-N	S-M	2.80518	hydrogen,polar,
PDB_3SPI	A	A	LOOP15	SHEET8_8	E	320	L	317	CB-O	S-M	3.45273	weakhydrogen,weakpolar,
PDB_3SPI	A	A	LOOP15	SHEET8_8	E	320	L	317	N-O	M-M	2.6265	hydrogen,polar,
PDB_3SPI	A	A	LOOP15	SHEET8_8	E	320	L	317	CA-O	M-M	3.32589	weakpolar,
PDB_3SPI	A	A	LOOP15	SHEET8_8	E	320	L	317	CG-CB	S-S	4.20476	hydrophobic,
PDB_3SPI	A	A	LOOP15	SHEET8_8	E	320	L	317	C-O	M-M	3.59982	carbonyl,
PDB_3SPI	A	A	SHEET9_9	SHEET2_2	I	321	A	200	CG2-O	S-M	3.38894	weakpolar,
PDB_3SPI	A	A	SHEET9_9	SHEET2_2	I	321	A	200	CA-O	M-M	3.11182	weakhydrogen,weakpolar,
PDB_3SPI	A	A	SHEET9_9	SHEET2_2	I	321	A	200	C-O	M-M	3.34961	carbonyl,
PDB_3SPI	A	A	SHEET9_9	SHEET2_2	I	321	V	202	CG2-CG1	S-S	3.55925	hydrophobic,
PDB_3SPI	A	A	SHEET9_9	SHEET3_3	I	321	L	211	CG2-CD1	S-S	3.90817	hydrophobic,
PDB_3SPI	A	A	SHEET9_9	HELIX6	I	321	L	288	CB-CD2	S-S	4.10779	hydrophobic,
PDB_3SPI	A	A	SHEET9_9	HELIX6	I	321	L	288	CG2-CD2	S-S	4.05519	hydrophobic,
PDB_3SPI	A	A	SHEET9_9	LOOP13	I	321	F	293	CD1-CE1	S-S	4.0944	hydrophobic,
PDB_3SPI	A	A	SHEET9_9	SHEET8_8	I	321	L	317	CG1-O	S-M	3.38409	weakhydrogen,weakpolar,
PDB_3SPI	A	A	SHEET9_9	SHEET8_8	I	321	L	317	N-O	M-M	3.22495	hydrogen,polar,
PDB_3SPI	A	A	SHEET9_9	LOOP15	I	321	A	318	N-O	M-M	3.60161	hydrogen,
PDB_3SPI	A	A	SHEET9_9	LOOP6	L	322	N	199	CG-CB	S-S	4.15937	hydrophobic,
PDB_3SPI	A	A	SHEET9_9	LOOP6	L	322	N	199	CD1-CB	S-S	4.06718	hydrophobic,
PDB_3SPI	A	A	SHEET9_9	SHEET2_2	L	322	A	200	N-O	M-M	2.66655	hydrogen,polar,
PDB_3SPI	A	A	SHEET9_9	SHEET2_2	L	322	V	201	O-CA	M-M	3.19103	weakhydrogen,weakpolar,
PDB_3SPI	A	A	SHEET9_9	SHEET2_2	L	322	V	201	O-CB	M-S	3.4781	weakpolar,
PDB_3SPI	A	A	SHEET9_9	SHEET2_2	L	322	V	201	CB-CG1	S-S	4.01986	hydrophobic,
PDB_3SPI	A	A	SHEET9_9	SHEET2_2	L	322	V	202	O-N	M-M	3.14917	hydrogen,polar,
PDB_3SPI	A	A	SHEET9_9	SHEET2_2	W	323	V	202	CZ3-CG2	S-S	3.979	hydrophobic,
PDB_3SPI	A	A	SHEET9_9	SHEET2_2	W	323	V	202	CZ3-CG2	S-S	3.979	carbonpi
PDB_3SPI	A	A	SHEET9_9	SHEET2_2	W	323	V	202	CZ3-CG2	S-S	3.979	carbonpi
PDB_3SPI	A	A	SHEET9_9	SHEET2_2	W	323	V	202	CZ3-CG2	S-S	3.979	carbonpi
PDB_3SPI	A	A	SHEET9_9	SHEET2_2	W	323	V	202	CE2-CG2	S-S	3.75557	carbonpi
PDB_3SPI	A	A	SHEET9_9	SHEET2_2	W	323	V	202	CE2-CG2	S-S	3.75557	carbonpi
PDB_3SPI	A	A	SHEET9_9	SHEET2_2	W	323	V	202	CE2-CG2	S-S	3.75557	carbonpi
PDB_3SPI	A	A	SHEET9_9	SHEET2_2	W	323	V	202	CZ2-CG2	S-S	4.06271	hydrophobic,
PDB_3SPI	A	A	SHEET9_9	SHEET2_2	W	323	V	202	CZ2-CG2	S-S	4.06271	carbonpi
PDB_3SPI	A	A	SHEET9_9	SHEET2_2	W	323	V	202	CZ2-CG2	S-S	4.06271	carbonpi
PDB_3SPI	A	A	SHEET9_9	SHEET2_2	W	323	V	202	CZ2-CG2	S-S	4.06271	carbonpi
PDB_3SPI	A	A	SHEET9_9	SHEET2_2	W	323	V	202	CE3-CG1	S-S	3.97449	hydrophobic,
PDB_3SPI	A	A	SHEET9_9	SHEET2_2	W	323	V	202	CG-CG2	S-S	4.06323	hydrophobic,
PDB_3SPI	A	A	SHEET9_9	SHEET2_2	W	323	V	202	CG-CG2	S-S	4.06323	carbonpi
PDB_3SPI	A	A	SHEET9_9	SHEET2_2	W	323	V	202	CG-CG2	S-S	4.06323	carbonpi
PDB_3SPI	A	A	SHEET9_9	SHEET2_2	W	323	V	202	CG-CG2	S-S	4.06323	carbonpi
PDB_3SPI	A	A	SHEET9_9	SHEET2_2	W	323	V	202	CD2-CG2	S-S	3.57376	hydrophobic,
PDB_3SPI	A	A	SHEET9_9	SHEET2_2	W	323	V	202	CD2-CG2	S-S	3.57376	carbonpi
PDB_3SPI	A	A	SHEET9_9	SHEET2_2	W	323	V	202	CD2-CG2	S-S	3.57376	carbonpi
PDB_3SPI	A	A	SHEET9_9	SHEET2_2	W	323	V	202	CD2-CG2	S-S	3.57376	carbonpi
PDB_3SPI	A	A	SHEET9_9	SHEET2_2	W	323	V	202	CE3-CG2	S-S	3.70067	hydrophobic,
PDB_3SPI	A	A	SHEET9_9	SHEET2_2	W	323	V	202	CE3-CG2	S-S	3.70067	carbonpi
PDB_3SPI	A	A	SHEET9_9	SHEET2_2	W	323	V	202	CE3-CG2	S-S	3.70067	carbonpi
PDB_3SPI	A	A	SHEET9_9	SHEET2_2	W	323	V	202	CE3-CG2	S-S	3.70067	carbonpi
PDB_3SPI	A	A	SHEET9_9	LOOP12	W	323	I	283	CH2-O	S-M	3.49386	weakhydrogen,weakpolar,
PDB_3SPI	A	A	SHEET9_9	HELIX6	W	323	R	285	CH2-N	S-M	3.54122	donorpi
PDB_3SPI	A	A	SHEET9_9	HELIX6	W	323	R	285	CH2-N	S-M	3.54122	donorpi
PDB_3SPI	A	A	SHEET9_9	HELIX6	W	323	R	285	CZ3-N	S-M	3.52784	donorpi
PDB_3SPI	A	A	SHEET9_9	HELIX6	W	323	R	285	CZ3-N	S-M	3.52784	donorpi
PDB_3SPI	A	A	SHEET9_9	HELIX6	W	323	R	285	CE2-N	S-M	3.85479	donorpi
PDB_3SPI	A	A	SHEET9_9	HELIX6	W	323	R	285	CE2-N	S-M	3.85479	donorpi
PDB_3SPI	A	A	SHEET9_9	HELIX6	W	323	R	285	CZ2-N	S-M	3.72222	donorpi
PDB_3SPI	A	A	SHEET9_9	HELIX6	W	323	R	285	CZ2-N	S-M	3.72222	donorpi
PDB_3SPI	A	A	SHEET9_9	HELIX6	W	323	R	285	NE1-CB	S-S	3.75489	carbonpi
PDB_3SPI	A	A	SHEET9_9	HELIX6	W	323	R	285	NE1-CB	S-S	3.75489	carbonpi
PDB_3SPI	A	A	SHEET9_9	HELIX6	W	323	R	285	NE1-CB	S-S	3.75489	carbonpi
PDB_3SPI	A	A	SHEET9_9	HELIX6	W	323	R	285	CE2-CB	S-S	3.64918	carbonpi
PDB_3SPI	A	A	SHEET9_9	HELIX6	W	323	R	285	CE2-CB	S-S	3.64918	carbonpi
PDB_3SPI	A	A	SHEET9_9	HELIX6	W	323	R	285	CE2-CB	S-S	3.64918	carbonpi
PDB_3SPI	A	A	SHEET9_9	HELIX6	W	323	R	285	CD2-N	S-M	3.86065	donorpi
PDB_3SPI	A	A	SHEET9_9	HELIX6	W	323	R	285	CD2-N	S-M	3.86065	donorpi
PDB_3SPI	A	A	SHEET9_9	HELIX6	W	323	R	285	CE3-N	S-M	3.69965	donorpi
PDB_3SPI	A	A	SHEET9_9	HELIX6	W	323	R	285	CE3-N	S-M	3.69965	donorpi
PDB_3SPI	A	A	SHEET9_9	HELIX6	W	323	R	285	CB-CB	S-S	4.2204	hydrophobic,
PDB_3SPI	A	A	SHEET9_9	HELIX6	W	323	R	285	CB-CB	S-S	4.2204	carbonpi
PDB_3SPI	A	A	SHEET9_9	HELIX6	W	323	R	285	CB-CB	S-S	4.2204	carbonpi
PDB_3SPI	A	A	SHEET9_9	HELIX6	W	323	R	285	CB-CB	S-S	4.2204	carbonpi
PDB_3SPI	A	A	SHEET9_9	HELIX6	W	323	R	285	CG-CB	S-S	3.56897	hydrophobic,
PDB_3SPI	A	A	SHEET9_9	HELIX6	W	323	R	285	CG-CB	S-S	3.56897	carbonpi
PDB_3SPI	A	A	SHEET9_9	HELIX6	W	323	R	285	CG-CB	S-S	3.56897	carbonpi
PDB_3SPI	A	A	SHEET9_9	HELIX6	W	323	R	285	CG-CB	S-S	3.56897	carbonpi
PDB_3SPI	A	A	SHEET9_9	HELIX6	W	323	R	285	CD1-CB	S-S	3.70007	carbonpi
PDB_3SPI	A	A	SHEET9_9	HELIX6	W	323	R	285	CD1-CB	S-S	3.70007	carbonpi
PDB_3SPI	A	A	SHEET9_9	HELIX6	W	323	R	285	CD1-CB	S-S	3.70007	carbonpi
PDB_3SPI	A	A	SHEET9_9	HELIX6	W	323	R	285	CD2-CB	S-S	3.51937	hydrophobic,
PDB_3SPI	A	A	SHEET9_9	HELIX6	W	323	R	285	CD2-CB	S-S	3.51937	carbonpi
PDB_3SPI	A	A	SHEET9_9	HELIX6	W	323	R	285	CD2-CB	S-S	3.51937	carbonpi
PDB_3SPI	A	A	SHEET9_9	HELIX6	W	323	R	285	CD2-CB	S-S	3.51937	carbonpi
PDB_3SPI	A	A	SHEET9_9	HELIX6	W	323	R	285	CE3-CB	S-S	4.08212	hydrophobic,
PDB_3SPI	A	A	SHEET9_9	HELIX6	W	323	R	285	CE3-CB	S-S	4.08212	carbonpi
PDB_3SPI	A	A	SHEET9_9	HELIX6	W	323	R	285	CE3-CB	S-S	4.08212	carbonpi
PDB_3SPI	A	A	SHEET9_9	HELIX6	W	323	R	285	CE3-CB	S-S	4.08212	carbonpi
PDB_3SPI	A	A	SHEET9_9	HELIX6	W	323	R	285	CZ3-CA	S-M	3.91605	carbonpi
PDB_3SPI	A	A	SHEET9_9	HELIX6	W	323	R	285	CZ3-CA	S-M	3.91605	carbonpi
PDB_3SPI	A	A	SHEET9_9	HELIX6	W	323	R	285	CZ3-CA	S-M	3.91605	carbonpi
PDB_3SPI	A	A	SHEET9_9	HELIX6	W	323	R	285	CE2-CA	S-M	3.92512	carbonpi
PDB_3SPI	A	A	SHEET9_9	HELIX6	W	323	R	285	CE2-CA	S-M	3.92512	carbonpi
PDB_3SPI	A	A	SHEET9_9	HELIX6	W	323	R	285	CE2-CA	S-M	3.92512	carbonpi
PDB_3SPI	A	A	SHEET9_9	HELIX6	W	323	R	285	CG-CA	S-M	4.02228	carbonpi
PDB_3SPI	A	A	SHEET9_9	HELIX6	W	323	R	285	CG-CA	S-M	4.02228	carbonpi
PDB_3SPI	A	A	SHEET9_9	HELIX6	W	323	R	285	CG-CA	S-M	4.02228	carbonpi
PDB_3SPI	A	A	SHEET9_9	HELIX6	W	323	R	285	CD2-CA	S-M	3.55174	carbonpi
PDB_3SPI	A	A	SHEET9_9	HELIX6	W	323	R	285	CD2-CA	S-M	3.55174	carbonpi
PDB_3SPI	A	A	SHEET9_9	HELIX6	W	323	R	285	CD2-CA	S-M	3.55174	carbonpi
PDB_3SPI	A	A	SHEET9_9	HELIX6	W	323	R	285	CE3-CA	S-M	3.55288	carbonpi
PDB_3SPI	A	A	SHEET9_9	HELIX6	W	323	R	285	CE3-CA	S-M	3.55288	carbonpi
PDB_3SPI	A	A	SHEET9_9	HELIX6	W	323	R	285	CE3-CA	S-M	3.55288	carbonpi
PDB_3SPI	A	A	SHEET9_9	HELIX6	W	323	R	285	CB-CG	S-S	3.79245	hydrophobic,
PDB_3SPI	A	A	SHEET9_9	HELIX6	W	323	R	285	CB-CG	S-S	3.79245	carbonpi
PDB_3SPI	A	A	SHEET9_9	HELIX6	W	323	R	285	CG-CG	S-S	3.63313	hydrophobic,
PDB_3SPI	A	A	SHEET9_9	HELIX6	W	323	R	285	CG-CG	S-S	3.63313	carbonpi
PDB_3SPI	A	A	SHEET9_9	HELIX6	W	323	R	285	CD1-CG	S-S	3.82356	carbonpi
PDB_3SPI	A	A	SHEET9_9	HELIX6	W	323	R	285	CD2-CG	S-S	4.10398	hydrophobic,
PDB_3SPI	A	A	SHEET9_9	HELIX6	W	323	R	285	CD2-CG	S-S	4.10398	carbonpi
PDB_3SPI	A	A	SHEET9_9	HELIX6	W	323	L	288	CB-CD2	S-S	4.09773	hydrophobic,
PDB_3SPI	A	A	SHEET9_9	HELIX6	W	323	L	288	CE3-CD2	S-S	3.58699	hydrophobic,
PDB_3SPI	A	A	LOOP16	SHEET2_2	G	324	V	202	N-O	M-M	2.94053	hydrogen,polar,
PDB_3SPI	A	A	SHEET10_10	SHEET2_2	H	325	V	201	CB-CB	S-S	4.22666	hydrophobic,
PDB_3SPI	A	A	SHEET10_10	SHEET2_2	H	325	V	201	CB-CG1	S-S	3.71032	hydrophobic,
PDB_3SPI	A	A	SHEET10_10	SHEET2_2	H	325	A	203	O-CB	M-S	3.24827	weakhydrogen,weakpolar,
PDB_3SPI	A	A	SHEET10_10	SHEET9_9	H	325	L	322	CB-CB	S-S	4.05717	hydrophobic,
PDB_3SPI	A	A	SHEET10_10	SHEET9_9	H	325	L	322	CB-CB	S-S	4.05717	carbonpi
PDB_3SPI	A	A	SHEET10_10	SHEET9_9	H	325	L	322	CG-CB	S-S	3.7674	carbonpi
PDB_3SPI	A	A	SHEET10_10	SHEET9_9	H	325	L	322	ND1-CB	S-S	3.77814	weakhydrogen,
PDB_3SPI	A	A	SHEET10_10	SHEET9_9	H	325	L	322	ND1-CB	S-S	3.77814	carbonpi
PDB_3SPI	A	A	SHEET10_10	SHEET9_9	H	325	L	322	CD2-CD1	S-S	3.93272	carbonpi
PDB_3SPI	A	A	SHEET10_10	SHEET9_9	H	325	W	323	ND1-O	S-M	3.07698	hydrogen,polar,
PDB_3SPI	A	D	SHEET10_10	LOOP9	R	326	E	242	CD-OE1	S-S	3.50023	weakhydrogen,
PDB_3SPI	A	D	SHEET10_10	LOOP9	R	326	E	242	NE-OE1	S-S	3.7281	ionic,
PDB_3SPI	A	D	SHEET10_10	LOOP9	R	326	E	242	CG-OE2	S-S	3.50438	weakhydrogen,
PDB_3SPI	A	A	SHEET10_10	LOOP6	F	327	S	197	CZ-OG	S-S	3.46635	weakpolar,
PDB_3SPI	A	A	SHEET10_10	LOOP6	F	327	N	199	CZ-O	S-M	3.41602	weakhydrogen,weakpolar,
PDB_3SPI	A	A	SHEET10_10	SHEET2_2	F	327	V	201	CD2-CG2	S-S	4.0853	hydrophobic,
PDB_3SPI	A	A	SHEET10_10	SHEET2_2	F	327	V	201	CE2-CG2	S-S	3.78143	hydrophobic,
PDB_3SPI	A	A	SHEET10_10	SHEET6_6	F	327	T	269	CD2-CG2	S-S	4.03323	hydrophobic,
PDB_3SPI	A	A	LOOP17	SHEET3_3	E	328	R	214	O-NH2	M-S	2.75795	hydrogen,polar,
PDB_3SPI	A	A	LOOP17	SHEET3_3	E	328	R	214	O-NH1	M-S	2.85133	hydrogen,polar,
PDB_3SPI	A	D	LOOP17	SHEET44_44	P	329	P	245	CB-CG	S-S	3.85406	hydrophobic,
PDB_3SPI	A	A	LOOP17	LOOP11	V	330	P	267	CG2-CB	S-S	3.87314	hydrophobic,
PDB_3SPI	A	A	LOOP17	LOOP11	V	330	P	267	CG2-CG	S-S	3.4386	hydrophobic,
PDB_3SPI	A	A	LOOP17	LOOP17	V	330	E	328	N-O	M-M	3.36158	polar,
PDB_3SPI	A	D	SHEET11_11	SHEET44_44	L	331	P	245	CB-CB	S-S	4.10055	hydrophobic,
PDB_3SPI	A	D	SHEET11_11	SHEET44_44	L	331	P	245	CG-CB	S-S	4.10415	hydrophobic,
PDB_3SPI	A	D	SHEET11_11	SHEET44_44	L	331	P	245	CD2-CB	S-S	4.12354	hydrophobic,
PDB_3SPI	A	D	SHEET11_11	SHEET44_44	L	331	P	245	O-CB	M-S	3.41471	weakpolar,
PDB_3SPI	A	D	SHEET11_11	SHEET44_44	L	331	P	245	O-CG	M-S	3.44076	weakpolar,
PDB_3SPI	A	D	SHEET11_11	SHEET44_44	L	331	L	246	CD2-CB	S-S	4.00769	hydrophobic,
PDB_3SPI	A	D	SHEET11_11	SHEET44_44	L	331	L	246	CD2-CG	S-S	4.19273	hydrophobic,
PDB_3SPI	A	D	SHEET11_11	SHEET44_44	L	331	L	246	CD2-CD1	S-S	4.23282	hydrophobic,
PDB_3SPI	A	D	SHEET11_11	LOOP1	E	333	N	43	OE2-N	S-M	3.06948	hydrogen,polar,
PDB_3SPI	A	D	SHEET11_11	LOOP1	E	333	N	43	OE2-ND2	S-S	2.64959	hydrogen,polar,
PDB_3SPI	A	A	LOOP18	SHEET11_11	K	335	E	333	NZ-O	S-M	3.48947	hydrogen,polar,
PDB_3SPI	A	D	LOOP18	LOOP1	N	336	N	53	O-ND2	M-S	3.06329	hydrogen,polar,
PDB_3SPI	A	A	LOOP18	LOOP18	Q	337	E	334	O-N	M-M	3.06598	hydrogen,polar,
PDB_3SPI	A	A	LOOP18	LOOP18	Q	337	E	334	O-CG	M-S	3.27091	weakpolar,
PDB_3SPI	A	A	LOOP18	LOOP18	Q	337	E	334	CG-CG	S-S	3.91192	hydrophobic,
PDB_3SPI	A	A	LOOP18	LOOP18	Q	337	E	334	CG-OE2	S-S	3.28253	weakpolar,
PDB_3SPI	A	A	LOOP18	LOOP18	Q	337	E	334	NE2-OE2	S-S	2.90195	hydrogen,polar,
PDB_3SPI	A	A	SHEET12_12	SHEET11_11	Y	338	L	331	CD2-CD1	S-S	4.05905	hydrophobic,
PDB_3SPI	A	A	SHEET12_12	SHEET11_11	Y	338	F	332	CA-O	M-M	3.59771	weakhydrogen,
PDB_3SPI	A	A	SHEET12_12	SHEET11_11	Y	338	E	333	CD2-CB	S-S	3.9428	hydrophobic,
PDB_3SPI	A	A	SHEET12_12	SHEET11_11	Y	338	E	333	CE2-CB	S-S	3.73322	hydrophobic,
PDB_3SPI	A	A	SHEET12_12	SHEET11_11	Y	338	E	333	CE2-CG	S-S	3.91668	hydrophobic,
PDB_3SPI	A	D	SHEET12_12	LOOP1	Y	338	N	43	CE1-OD1	S-S	3.25184	weakpolar,
PDB_3SPI	A	D	SHEET12_12	LOOP1	Y	338	N	43	OH-O	S-M	3.40322	polar,
PDB_3SPI	A	D	SHEET12_12	LOOP1	Y	338	F	45	CE1-CB	S-S	4.04898	hydrophobic,
PDB_3SPI	A	D	SHEET12_12	LOOP1	Y	338	F	45	CD1-CD1	S-S	3.73828	hydrophobic,pi-pi,
PDB_3SPI	A	D	SHEET12_12	LOOP1	Y	338	N	53	CD1-O	S-M	3.52369	weakhydrogen,
PDB_3SPI	A	D	SHEET12_12	LOOP1	Y	338	V	54	O-CA	M-M	3.07562	weakhydrogen,weakpolar,
PDB_3SPI	A	D	SHEET12_12	LOOP1	Y	338	V	54	O-C	M-M	3.32131	carbonyl,
PDB_3SPI	A	D	SHEET12_12	LOOP1	Y	338	V	54	O-CG2	M-S	3.5881	weakhydrogen,
PDB_3SPI	A	D	SHEET12_12	LOOP1	Y	338	E	55	O-N	M-M	2.81472	hydrogen,polar,
PDB_3SPI	A	A	SHEET12_12	SHEET11_11	K	339	L	331	O-CD1	M-S	3.30298	weakhydrogen,weakpolar,
PDB_3SPI	A	A	SHEET12_12	SHEET11_11	K	339	L	331	O-CA	M-M	3.39858	weakhydrogen,weakpolar,
PDB_3SPI	A	A	SHEET12_12	SHEET11_11	K	339	F	332	O-N	M-M	3.14016	hydrogen,polar,
PDB_3SPI	A	A	SHEET12_12	SHEET11_11	K	339	F	332	N-O	M-M	3.04917	hydrogen,polar,
PDB_3SPI	A	A	SHEET12_12	SHEET11_11	K	339	F	332	CB-CE1	S-S	3.77488	hydrophobic,
PDB_3SPI	A	A	SHEET12_12	SHEET11_11	K	339	F	332	CB-CZ	S-S	3.69986	hydrophobic,
PDB_3SPI	A	A	SHEET12_12	LOOP18	K	339	E	334	CD-OE1	S-S	2.93351	weakhydrogen,weakpolar,
PDB_3SPI	A	A	SHEET12_12	LOOP18	K	339	E	334	CD-OE2	S-S	3.45047	weakpolar,
PDB_3SPI	A	A	SHEET12_12	LOOP18	K	339	E	334	NZ-OE1	S-S	3.81894	ionic,
PDB_3SPI	A	D	SHEET12_12	LOOP1	K	339	E	55	CA-O	M-M	3.26743	weakhydrogen,weakpolar,
PDB_3SPI	A	D	SHEET12_12	LOOP1	K	339	E	55	C-O	M-M	3.45432	carbonyl,
PDB_3SPI	A	D	SHEET12_12	LOOP1	K	339	E	55	CG-O	S-M	3.47974	weakhydrogen,weakpolar,
PDB_3SPI	A	D	SHEET12_12	LOOP1	K	339	E	55	CG-CB	S-S	4.04162	hydrophobic,
PDB_3SPI	A	D	SHEET12_12	LOOP1	K	339	T	57	CG-CG2	S-S	3.61988	hydrophobic,
PDB_3SPI	A	D	SHEET12_12	LOOP1	K	339	T	57	CD-CG2	S-S	3.58412	hydrophobic,
PDB_3SPI	A	A	SHEET12_12	LOOP11	V	340	P	267	CG1-CG	S-S	4.07237	hydrophobic,
PDB_3SPI	A	A	SHEET12_12	LOOP17	V	340	V	330	CG1-CB	S-S	3.85501	hydrophobic,
PDB_3SPI	A	A	SHEET12_12	LOOP17	V	340	V	330	CG1-CG2	S-S	3.75808	hydrophobic,
PDB_3SPI	A	A	SHEET12_12	LOOP17	V	340	V	330	CA-O	M-M	3.03066	weakhydrogen,weakpolar,
PDB_3SPI	A	A	SHEET12_12	LOOP17	V	340	V	330	C-O	M-M	3.36208	carbonyl,
PDB_3SPI	A	D	SHEET12_12	LOOP1	V	340	V	54	CG2-CG2	S-S	3.77656	hydrophobic,
PDB_3SPI	A	D	SHEET12_12	LOOP1	V	340	E	55	N-O	M-M	2.73126	hydrogen,polar,
PDB_3SPI	A	D	SHEET12_12	LOOP1	V	340	F	56	CB-CD1	S-S	3.8319	hydrophobic,
PDB_3SPI	A	D	SHEET12_12	LOOP1	V	340	F	56	CG2-CD1	S-S	3.76474	hydrophobic,
PDB_3SPI	A	D	SHEET12_12	LOOP1	V	340	F	56	CG2-CE1	S-S	3.87883	hydrophobic,
PDB_3SPI	A	D	SHEET12_12	LOOP1	V	340	T	57	O-N	M-M	2.83061	hydrogen,polar,
PDB_3SPI	A	D	SHEET12_12	LOOP1	V	340	T	57	O-OG1	M-S	3.19046	hydrogen,polar,
PDB_3SPI	A	A	LOOP19	LOOP17	D	341	V	330	O-CB	M-S	3.19503	weakpolar,
PDB_3SPI	A	A	LOOP19	LOOP17	D	341	V	330	O-CG1	M-S	3.13074	weakpolar,
PDB_3SPI	A	A	LOOP19	LOOP17	D	341	V	330	N-O	M-M	2.76129	hydrogen,polar,
PDB_3SPI	A	A	LOOP19	SHEET11_11	D	341	F	332	CB-CE2	S-S	3.94743	hydrophobic,
PDB_3SPI	A	D	LOOP19	LOOP1	D	341	T	57	CA-OG1	M-S	3.71113	weakhydrogen,
PDB_3SPI	A	D	LOOP19	LOOP1	D	341	N	58	OD1-CB	S-S	3.13561	weakpolar,
PDB_3SPI	A	A	HELIX7	SHEET3_3	Y	342	N	217	OH-O	S-M	2.577	polar,
PDB_3SPI	A	A	HELIX7	LOOP8	Y	342	L	218	CD2-CD2	S-S	3.88824	hydrophobic,
PDB_3SPI	A	A	HELIX7	LOOP8	Y	342	L	218	CE2-CD2	S-S	3.52358	hydrophobic,
PDB_3SPI	A	A	HELIX7	LOOP11	Y	342	P	267	CE2-CG	S-S	4.04789	hydrophobic,
PDB_3SPI	A	A	HELIX7	SHEET12_12	Y	342	V	340	CE1-CB	S-S	3.94301	hydrophobic,
PDB_3SPI	A	A	HELIX7	SHEET12_12	Y	342	V	340	CD1-CG1	S-S	3.63949	hydrophobic,
PDB_3SPI	A	A	HELIX7	SHEET12_12	Y	342	V	340	CD1-CG1	S-S	3.63949	carbonpi
PDB_3SPI	A	A	HELIX7	SHEET12_12	Y	342	V	340	CE1-CG1	S-S	3.4451	hydrophobic,
PDB_3SPI	A	A	HELIX7	SHEET12_12	Y	342	V	340	CE1-CG1	S-S	3.4451	carbonpi
PDB_3SPI	A	A	HELIX7	SHEET12_12	Y	342	V	340	CZ-CG1	S-S	3.93413	carbonpi
PDB_3SPI	A	D	HELIX7	LOOP1	Y	342	F	56	OH-CZ	S-S	3.79226	donorpi
PDB_3SPI	A	D	HELIX7	LOOP1	Y	342	F	56	OH-CE2	S-S	3.92514	donorpi
PDB_3SPI	A	D	HELIX7	LOOP1	Y	342	F	56	OH-CE1	S-S	3.86547	donorpi
PDB_3SPI	A	D	HELIX7	LOOP1	Y	342	F	56	CE1-CD1	S-S	3.61394	hydrophobic,pi-pi,
PDB_3SPI	A	D	HELIX7	LOOP1	Y	342	F	56	CD1-CB	S-S	4.07417	hydrophobic,
PDB_3SPI	A	D	HELIX7	LOOP1	Y	342	F	56	CE1-CB	S-S	3.68937	hydrophobic,
PDB_3SPI	A	D	HELIX7	LOOP1	Y	342	F	56	CE1-CG	S-S	3.5019	hydrophobic,pi-pi,
PDB_3SPI	A	D	HELIX7	LOOP1	Y	342	T	57	CB-O	S-M	3.53287	weakhydrogen,
PDB_3SPI	A	D	HELIX7	LOOP1	Y	342	T	57	N-O	M-M	3.09762	hydrogen,polar,
PDB_3SPI	A	D	HELIX7	LOOP1	Y	342	N	58	C-O	M-M	3.58094	carbonyl,
PDB_3SPI	A	D	HELIX7	LOOP1	Y	342	N	58	CB-O	S-M	3.23573	weakpolar,
PDB_3SPI	A	D	HELIX7	LOOP1	Y	342	M	59	CG-CG	S-S	3.88367	hydrophobic,
PDB_3SPI	A	D	HELIX7	LOOP1	Y	342	M	59	CD1-CG	S-S	3.53968	hydrophobic,
PDB_3SPI	A	D	HELIX7	LOOP1	Y	342	M	59	CE1-CG	S-S	4.07147	hydrophobic,
PDB_3SPI	A	A	HELIX7	LOOP19	S	343	D	341	N-O	M-M	3.42207	polar,
PDB_3SPI	A	A	HELIX7	LOOP19	S	343	D	341	N-OD1	M-S	3.2617	hydrogen,polar,
PDB_3SPI	A	A	HELIX7	LOOP19	S	343	D	341	OG-OD1	S-S	2.71731	hydrogen,polar,
PDB_3SPI	A	D	HELIX7	LOOP1	S	343	N	58	N-O	M-M	3.3871	polar,
PDB_3SPI	A	A	HELIX7	LOOP17	H	344	E	328	O-CB	M-S	3.74011	weakhydrogen,
PDB_3SPI	A	A	HELIX7	LOOP17	H	344	V	330	CB-CG1	S-S	3.7848	hydrophobic,
PDB_3SPI	A	A	HELIX7	LOOP19	H	344	D	341	N-O	M-M	3.51239	hydrogen,
PDB_3SPI	A	A	HELIX7	HELIX7	H	344	Y	342	N-O	M-M	3.31958	polar,
PDB_3SPI	A	A	HELIX7	SHEET1_1	F	345	L	195	CE2-CG	S-S	3.86243	hydrophobic,
PDB_3SPI	A	A	HELIX7	SHEET1_1	F	345	L	195	CD2-CD2	S-S	3.9932	hydrophobic,
PDB_3SPI	A	A	HELIX7	SHEET1_1	F	345	L	195	CD2-CD2	S-S	3.9932	carbonpi
PDB_3SPI	A	A	HELIX7	SHEET1_1	F	345	L	195	CE2-CD2	S-S	4.00406	hydrophobic,
PDB_3SPI	A	A	HELIX7	SHEET1_1	F	345	L	195	CE2-CD2	S-S	4.00406	carbonpi
PDB_3SPI	A	A	HELIX7	SHEET1_1	F	345	F	196	CE2-O	S-M	3.57793	weakhydrogen,
PDB_3SPI	A	A	HELIX7	SHEET3_3	F	345	R	214	CZ-CB	S-S	4.12694	hydrophobic,
PDB_3SPI	A	A	HELIX7	SHEET3_3	F	345	R	214	CE1-CG	S-S	3.96588	hydrophobic,
PDB_3SPI	A	A	HELIX7	SHEET3_3	F	345	R	214	CZ-CG	S-S	4.01909	hydrophobic,
PDB_3SPI	A	A	HELIX7	SHEET3_3	F	345	R	214	CD1-CD	S-S	3.81381	carbonpi
PDB_3SPI	A	A	HELIX7	SHEET3_3	F	345	R	214	CE1-CD	S-S	3.63906	carbonpi
PDB_3SPI	A	A	HELIX7	SHEET3_3	F	345	R	214	CZ-CD	S-S	3.95923	carbonpi
PDB_3SPI	A	A	HELIX7	SHEET3_3	F	345	R	214	O-CD	M-S	3.70519	carbonpi
PDB_3SPI	A	A	HELIX7	SHEET3_3	F	345	R	214	O-NH1	M-S	2.89713	hydrogen,polar,
PDB_3SPI	A	A	HELIX7	LOOP11	F	345	P	267	CD1-CB	S-S	3.91328	hydrophobic,
PDB_3SPI	A	A	HELIX7	LOOP11	F	345	P	267	CE1-CB	S-S	3.53358	hydrophobic,
PDB_3SPI	A	A	HELIX7	LOOP11	F	345	P	267	CD1-CG	S-S	3.79327	hydrophobic,
PDB_3SPI	A	A	HELIX7	LOOP11	F	345	P	267	CE1-CG	S-S	3.75158	hydrophobic,
PDB_3SPI	A	A	HELIX7	HELIX7	F	345	Y	342	N-O	M-M	3.22127	hydrogen,polar,
PDB_3SPI	A	A	HELIX7	HELIX7	F	345	Y	342	CB-O	S-M	3.15966	weakpolar,
PDB_3SPI	A	A	LOOP20	LOOP6	H	346	H	198	ND1-N	S-M	2.88041	hydrogen,polar,
PDB_3SPI	A	A	LOOP20	LOOP6	H	346	H	198	ND1-CB	S-S	3.31098	weakpolar,
PDB_3SPI	A	A	LOOP20	HELIX7	H	346	H	344	N-O	M-M	3.33614	polar,
PDB_3SPI	A	A	LOOP20	SHEET10_10	K	347	F	327	O-CA	M-M	3.6824	weakhydrogen,
PDB_3SPI	A	A	LOOP20	LOOP17	K	347	E	328	O-N	M-M	2.93329	hydrogen,polar,
PDB_3SPI	A	A	LOOP20	LOOP17	K	347	E	328	CB-CB	S-S	4.11666	hydrophobic,
PDB_3SPI	A	A	LOOP20	LOOP17	K	347	E	328	CB-CG	S-S	3.81927	hydrophobic,
PDB_3SPI	A	A	LOOP20	HELIX7	K	347	S	343	CE-O	S-M	3.53635	weakhydrogen,
PDB_3SPI	A	A	LOOP20	HELIX7	K	347	H	344	N-O	M-M	3.23045	hydrogen,polar,
PDB_3SPI	A	A	LOOP20	HELIX7	K	347	H	344	CD-ND1	S-S	3.86078	weakhydrogen,
PDB_3SPI	A	A	SHEET13_13	SHEET2_2	T	348	V	201	CG2-CG1	S-S	3.71228	hydrophobic,
PDB_3SPI	A	A	SHEET13_13	SHEET9_9	T	348	L	322	OG1-CD1	S-S	3.34499	weakpolar,
PDB_3SPI	A	A	SHEET13_13	SHEET10_10	T	348	R	326	CA-O	M-M	3.11289	weakpolar,
PDB_3SPI	A	A	SHEET13_13	SHEET10_10	T	348	R	326	CB-O	S-M	3.42945	weakpolar,
PDB_3SPI	A	A	SHEET13_13	SHEET10_10	T	348	R	326	C-O	M-M	3.48263	carbonyl,
PDB_3SPI	A	A	SHEET13_13	SHEET10_10	T	348	F	327	CG2-CE1	S-S	3.72829	hydrophobic,
PDB_3SPI	A	A	SHEET13_13	SHEET10_10	T	348	F	327	CG2-CD1	S-S	3.56993	hydrophobic,
PDB_3SPI	A	A	SHEET13_13	SHEET10_10	Y	349	H	325	O-CA	M-M	3.248	weakhydrogen,weakpolar,
PDB_3SPI	A	A	SHEET13_13	SHEET10_10	Y	349	H	325	O-C	M-M	3.52622	carbonyl,
PDB_3SPI	A	A	SHEET13_13	SHEET10_10	Y	349	R	326	OH-NE	S-S	2.79635	polar,
PDB_3SPI	A	A	SHEET13_13	SHEET10_10	Y	349	R	326	CE1-CB	S-S	3.92029	hydrophobic,
PDB_3SPI	A	A	SHEET13_13	SHEET10_10	Y	349	R	326	CE1-CB	S-S	3.92029	carbonpi
PDB_3SPI	A	A	SHEET13_13	SHEET10_10	Y	349	R	326	CE2-CB	S-S	3.75452	hydrophobic,
PDB_3SPI	A	A	SHEET13_13	SHEET10_10	Y	349	R	326	CE2-CB	S-S	3.75452	carbonpi
PDB_3SPI	A	A	SHEET13_13	SHEET10_10	Y	349	R	326	CZ-CB	S-S	3.52947	carbonpi
PDB_3SPI	A	A	SHEET13_13	SHEET10_10	Y	349	R	326	OH-CB	S-S	3.68629	carbonpi
PDB_3SPI	A	A	SHEET13_13	SHEET10_10	Y	349	R	326	CD2-O	S-M	3.32618	weakpolar,
PDB_3SPI	A	A	SHEET13_13	SHEET10_10	Y	349	R	326	O-N	M-M	3.02512	hydrogen,polar,
PDB_3SPI	A	A	SHEET13_13	SHEET10_10	Y	349	R	326	N-O	M-M	2.89549	hydrogen,polar,
PDB_3SPI	A	A	SHEET13_13	SHEET10_10	Y	349	R	326	OH-NH2	S-S	3.165	hydrogen,polar,
PDB_3SPI	A	A	SHEET13_13	SHEET10_10	Y	349	F	327	CE2-O	S-M	3.57765	weakhydrogen,
PDB_3SPI	A	A	SHEET13_13	SHEET10_10	E	350	H	325	CG-CE1	S-S	3.93072	carbonpi
PDB_3SPI	A	A	SHEET13_13	SHEET10_10	E	350	H	325	CG-NE2	S-S	3.68602	carbonpi
PDB_3SPI	A	A	LOOP21	LOOP16	V	351	G	324	N-O	M-M	2.79719	hydrogen,polar,
PDB_3SPI	A	A	LOOP21	SHEET10_10	V	351	R	326	CG2-CB	S-S	4.02126	hydrophobic,
PDB_3SPI	A	A	LOOP21	SHEET13_13	V	351	Y	349	CG2-CE1	S-S	3.84426	hydrophobic,
PDB_3SPI	A	A	LOOP21	SHEET13_13	P	352	E	350	CD-O	S-M	3.38113	weakhydrogen,weakpolar,
PDB_3SPI	A	A	LOOP21	LOOP21	S	353	V	351	N-O	M-M	2.94894	hydrogen,polar,
PDB_3SPI	A	A	LOOP21	LOOP21	S	353	V	351	OG-CG1	S-S	2.94939	weakpolar,
PDB_3SPI	A	A	LOOP21	LOOP21	T	354	V	351	N-O	M-M	2.96004	hydrogen,polar,
PDB_3SPI	A	A	LOOP21	LOOP21	T	354	V	351	CB-O	S-M	3.28256	weakpolar,
PDB_3SPI	A	A	LOOP21	LOOP21	T	354	V	351	OG1-O	S-M	2.8064	polar,
PDB_3SPI	A	A	LOOP21	LOOP21	T	354	V	351	OG1-CB	S-S	3.53212	weakhydrogen,
PDB_3SPI	A	A	LOOP21	LOOP21	T	354	V	351	OG1-CG1	S-S	3.48974	weakpolar,
PDB_3SPI	A	A	LOOP21	LOOP21	T	354	P	352	N-O	M-M	3.10199	hydrogen,polar,
PDB_3SPI	A	A	LOOP21	SHEET9_9	P	355	W	323	O-NE1	M-S	2.78704	hydrogen,polar,
PDB_3SPI	A	A	LOOP21	LOOP21	P	355	S	353	CD-O	S-M	3.4203	weakhydrogen,weakpolar,
PDB_3SPI	A	A	LOOP21	HELIX6	R	356	S	284	O-CB	M-S	3.20088	weakhydrogen,weakpolar,
PDB_3SPI	A	A	LOOP21	HELIX6	R	356	R	285	O-N	M-M	2.90813	hydrogen,polar,
PDB_3SPI	A	A	LOOP21	HELIX6	R	356	R	285	O-CB	M-S	3.44143	weakpolar,
PDB_3SPI	A	A	LOOP21	HELIX6	R	356	R	285	CB-CB	S-S	4.02234	hydrophobic,
PDB_3SPI	A	A	LOOP21	SHEET9_9	C	357	W	323	O-CZ2	M-S	3.30516	weakpolar,
PDB_3SPI	A	A	HELIX8	LOOP12	S	358	F	281	CB-O	S-M	3.42058	weakhydrogen,weakpolar,
PDB_3SPI	A	A	HELIX8	LOOP12	S	358	I	283	CA-O	M-M	3.17184	weakhydrogen,weakpolar,
PDB_3SPI	A	A	HELIX8	LOOP12	S	358	I	283	CB-O	S-M	3.19476	weakpolar,
PDB_3SPI	A	A	HELIX8	LOOP12	A	359	I	274	CB-CG2	S-S	3.72382	hydrophobic,
PDB_3SPI	A	A	HELIX8	LOOP12	A	359	F	281	CB-CE1	S-S	3.62359	hydrophobic,
PDB_3SPI	A	A	HELIX8	LOOP12	A	359	F	281	CB-CD1	S-S	3.52062	hydrophobic,
PDB_3SPI	A	A	HELIX8	LOOP12	A	359	F	281	N-O	M-M	3.29695	polar,
PDB_3SPI	A	A	HELIX8	LOOP12	A	359	F	281	CB-O	S-M	3.61731	weakhydrogen,
PDB_3SPI	A	A	HELIX8	LOOP12	K	360	F	281	N-CE1	M-S	3.64521	donorpi
PDB_3SPI	A	A	HELIX8	LOOP12	K	360	F	281	CA-CE1	M-S	3.86023	carbonpi
PDB_3SPI	A	A	HELIX8	LOOP12	K	360	F	281	CA-CE2	M-S	3.77066	carbonpi
PDB_3SPI	A	A	HELIX8	LOOP12	K	360	F	281	N-CZ	M-S	3.87976	donorpi
PDB_3SPI	A	A	HELIX8	LOOP12	K	360	F	281	CA-CZ	M-S	3.55749	carbonpi
PDB_3SPI	A	A	HELIX8	LOOP12	K	360	F	281	CB-CD2	S-S	3.96815	hydrophobic,
PDB_3SPI	A	A	HELIX8	LOOP12	K	360	F	281	CB-CD2	S-S	3.96815	carbonpi
PDB_3SPI	A	A	HELIX8	LOOP12	K	360	F	281	CB-CE2	S-S	3.82372	hydrophobic,
PDB_3SPI	A	A	HELIX8	LOOP12	K	360	F	281	CB-CE2	S-S	3.82372	carbonpi
PDB_3SPI	A	A	HELIX8	LOOP12	K	360	F	281	CG-CE2	S-S	3.9715	hydrophobic,
PDB_3SPI	A	A	HELIX8	LOOP12	K	360	F	281	N-CD1	M-S	3.8943	donorpi
PDB_3SPI	A	A	HELIX8	LOOP12	K	360	F	281	N-O	M-M	2.99555	hydrogen,polar,
PDB_3SPI	A	A	HELIX8	LOOP12	K	360	F	281	N-O	M-M	2.99555	donorpi
PDB_3SPI	A	A	HELIX8	LOOP12	K	360	F	281	CA-O	M-M	3.82134	carbonpi
PDB_3SPI	A	A	HELIX8	LOOP12	K	360	F	281	CB-O	S-M	3.52803	carbonpi
PDB_3SPI	A	A	HELIX8	HELIX8	K	360	S	358	N-O	M-M	3.1596	polar,
PDB_3SPI	A	A	HELIX8	HELIX8	K	360	S	358	CB-OG	S-S	3.55962	weakhydrogen,
PDB_3SPI	A	A	HELIX8	LOOP21	D	361	C	357	CB-CB	S-S	3.85015	hydrophobic,
PDB_3SPI	A	A	HELIX8	LOOP21	D	361	C	357	OD2-CB	S-S	3.59819	weakhydrogen,
PDB_3SPI	A	A	HELIX8	HELIX8	D	361	S	358	OD2-N	S-M	3.37546	hydrogen,polar,
PDB_3SPI	A	A	HELIX8	HELIX8	D	361	S	358	N-O	M-M	3.19921	hydrogen,polar,
PDB_3SPI	A	A	HELIX8	HELIX8	D	361	S	358	CB-O	S-M	3.63726	weakhydrogen,
PDB_3SPI	A	A	HELIX8	HELIX8	D	361	S	358	N-OG	M-S	3.22103	hydrogen,polar,
PDB_3SPI	A	A	HELIX8	HELIX8	D	361	S	358	OD2-OG	S-S	2.80003	polar,
PDB_3SPI	A	A	HELIX8	HELIX8	D	361	A	359	N-O	M-M	3.49853	polar,
PDB_3SPI	A	A	HELIX8	HELIX8	L	362	S	358	N-O	M-M	2.82837	hydrogen,polar,
PDB_3SPI	A	A	HELIX8	HELIX8	L	362	S	358	CB-O	S-M	3.28694	weakpolar,
PDB_3SPI	A	A	HELIX8	HELIX8	L	362	A	359	C-O	M-M	3.57579	carbonyl,
PDB_3SPI	A	A	HELIX8	HELIX8	L	362	A	359	N-O	M-M	3.20013	polar,
PDB_3SPI	A	A	HELIX8	HELIX8	L	362	A	359	CB-O	S-M	3.29117	weakhydrogen,weakpolar,
PDB_3SPI	A	A	HELIX8	HELIX8	L	362	K	360	N-O	M-M	3.44071	polar,
PDB_3SPI	A	A	HELIX8	HELIX8	V	363	A	359	CB-O	S-M	3.40869	weakpolar,
PDB_3SPI	A	A	HELIX8	HELIX8	V	363	A	359	CG2-O	S-M	3.17303	weakhydrogen,weakpolar,
PDB_3SPI	A	A	HELIX8	HELIX8	V	363	A	359	N-O	M-M	2.71622	hydrogen,polar,
PDB_3SPI	A	A	HELIX8	HELIX8	V	363	K	360	CB-O	S-M	3.59306	weakhydrogen,
PDB_3SPI	A	A	HELIX8	HELIX8	V	363	K	360	N-O	M-M	3.31595	polar,
PDB_3SPI	A	A	HELIX8	HELIX8	V	363	D	361	N-O	M-M	3.11262	polar,
PDB_3SPI	A	A	HELIX8	HELIX8	V	363	D	361	C-O	M-M	3.51973	carbonyl,
PDB_3SPI	A	A	HELIX8	HELIX8	E	364	K	360	CB-O	S-M	3.35235	weakpolar,
PDB_3SPI	A	A	HELIX8	HELIX8	E	364	K	360	CG-O	S-M	3.00963	weakhydrogen,weakpolar,
PDB_3SPI	A	A	HELIX8	HELIX8	E	364	K	360	N-O	M-M	2.85028	hydrogen,polar,
PDB_3SPI	A	A	HELIX8	HELIX8	E	364	K	360	OE2-CE	S-S	3.46591	weakpolar,
PDB_3SPI	A	A	HELIX8	HELIX8	E	364	D	361	CB-O	S-M	3.56006	weakhydrogen,
PDB_3SPI	A	A	HELIX8	HELIX8	E	364	D	361	N-O	M-M	2.94462	hydrogen,polar,
PDB_3SPI	A	A	HELIX8	HELIX8	E	364	D	361	CA-O	M-M	3.46889	weakpolar,
PDB_3SPI	A	A	HELIX8	HELIX8	E	364	D	361	C-O	M-M	3.51235	carbonyl,
PDB_3SPI	A	A	HELIX8	HELIX8	N	365	D	361	N-O	M-M	2.6519	hydrogen,polar,
PDB_3SPI	A	A	HELIX8	HELIX8	N	365	D	361	CB-O	S-M	3.34791	weakpolar,
PDB_3SPI	A	A	HELIX8	HELIX8	N	365	D	361	ND2-O	S-M	3.20781	polar,
PDB_3SPI	A	A	HELIX8	HELIX8	N	365	V	363	N-O	M-M	3.1435	polar,
PDB_3SPI	A	A	HELIX8	HELIX8	K	366	L	362	N-O	M-M	3.21574	hydrogen,polar,
PDB_3SPI	A	A	HELIX8	HELIX8	K	366	V	363	CB-O	S-M	3.15877	weakhydrogen,weakpolar,
PDB_3SPI	A	A	HELIX8	HELIX8	K	366	V	363	N-O	M-M	2.96426	hydrogen,polar,
PDB_3SPI	A	A	HELIX8	HELIX8	K	366	V	363	CA-O	M-M	3.46834	weakpolar,
PDB_3SPI	A	A	HELIX8	HELIX8	K	366	E	364	N-O	M-M	3.49792	polar,
PDB_3SPI	A	A	HELIX8	HELIX8	F	367	V	363	CD2-CG1	S-S	3.91627	hydrophobic,
PDB_3SPI	A	A	HELIX8	HELIX8	F	367	V	363	CE2-CG1	S-S	3.73722	hydrophobic,
PDB_3SPI	A	A	HELIX8	HELIX8	F	367	V	363	CD2-O	S-M	3.34173	weakpolar,
PDB_3SPI	A	A	HELIX8	HELIX8	F	367	V	363	N-O	M-M	3.32324	hydrogen,polar,
PDB_3SPI	A	A	HELIX8	HELIX8	F	367	E	364	N-O	M-M	3.11897	hydrogen,polar,
PDB_3SPI	A	A	HELIX8	HELIX8	F	367	N	365	N-O	M-M	3.01569	polar,
PDB_3SPI	A	A	HELIX8	HELIX8	L	368	E	364	N-O	M-M	3.38907	polar,
PDB_3SPI	A	A	HELIX8	HELIX8	L	368	N	365	N-O	M-M	2.88499	hydrogen,polar,
PDB_3SPI	A	A	HELIX8	HELIX8	L	368	N	365	CB-O	S-M	3.49501	weakhydrogen,weakpolar,
PDB_3SPI	A	A	HELIX8	HELIX8	L	369	N	365	N-O	M-M	3.24271	hydrogen,polar,
PDB_3SPI	A	A	HELIX8	HELIX8	S	370	K	366	CB-O	S-M	3.1578	weakpolar,
PDB_3SPI	A	A	HELIX8	HELIX8	S	370	K	366	N-O	M-M	2.95565	hydrogen,polar,
PDB_3SPI	A	A	HELIX8	HELIX8	S	370	L	368	N-O	M-M	3.25973	polar,
PDB_3SPI	A	A		HELIX8	N	371	F	367	CB-O	S-M	2.69444	weakpolar,
PDB_3SPI	A	A		HELIX8	N	371	L	368	N-O	M-M	2.77312	hydrogen,polar,
PDB_3SPI	A	A		HELIX8	N	371	L	368	CA-O	M-M	3.24018	weakpolar,
PDB_3SPI	A	A		HELIX8	N	371	L	368	C-O	M-M	3.23186	carbonyl,
PDB_3SPI	A	A		HELIX8	N	371	L	368	CB-O	S-M	3.39873	weakpolar,
PDB_3SPI	A	A		HELIX8	N	371	L	369	N-O	M-M	3.23702	polar,
PDB_3SPI	A	A		HELIX8	S	372	L	368	N-O	M-M	2.76086	hydrogen,polar,
PDB_3SPI	A	A		HELIX8	S	372	L	369	N-O	M-M	3.14368	hydrogen,polar,
PDB_3SPI	A	A		HELIX8	S	372	L	369	C-O	M-M	3.23582	carbonyl,
PDB_3SPI	A	A		HELIX2	PIO	400	R	78	O6-CA	L-M	3.71826	weakhydrogen,
[truncated: 13,159 more rows]
