# Supplementary material for: Determinants of trafficking, conduction, and disease within a K+ channel revealed through multiparametric deep mutational scanning
Source: eLife. 2022 May 31;11:e76903. doi: 10.7554/eLife.76903 (PMC9273215; doi:10.7554/eLife.76903)
Supplement: Supplementary file 3. — For KCNJ2 variants listed in ClinVar (as of March 25, 2022) with unknown significance or conflicting interpretation, we predicted mechanism underlying the variants disease phenotype: 'lof_s': loss of surface expression; 'gof_s': gain of surface expression; 'lof_f': loss of function (conduction); 'gof_f': gain of function (conduction). [file elife-76903-supp3.csv]

Supplementary File 3: Predicted Phenotype of KCNJ2 Variants of Unknown Significance
predicted phenotype
lof_s	loss of surface expression
gof_s	gain of surface expression
lof_f	loss of function (conduction)
gof_f	gain of function (conduction)
kir21_resno	Corresponding Residue Number in KCNJ2 (Kir2.1)
kir21_resid	Corresponding Amino Acid in KCNJ2 (Kir2.1)
kir21_FLAG_resno	Corresponding Residue Number in KCNJ2 (Kir2.1) with FLAG tag inserted at T115
Variant_ID	Gene	Mutation	Source	Clinical_Significance	ClinVar_ID	Condition	kir21_resno	kir21_resid	kir21_FLAG_resno	predicted_phenotype
41	KCNJ2	A132T	Clinvar only	Uncertain significance	NA	Andersen Tawil syndrome|Short QT syndrome 3	132	A	140	lof_s
68	KCNJ2	A132T	Clinvar only	Uncertain significance	NA	Andersen Tawil syndrome|Short QT syndrome 3	132	A	140	lof_f
40	KCNJ2	A70S	Clinvar & Gnomad	Uncertain significance	403977	Short QT syndrome 3|Andersen Tawil syndrome|not provided	70	A	70	lof_s
67	KCNJ2	A70S	Clinvar & Gnomad	Uncertain significance	403977	Short QT syndrome 3|Andersen Tawil syndrome|not provided	70	A	70	lof_f
45	KCNJ2	C122Y	Clinvar only	Uncertain significance	NA	Cardiovascular phenotype	122	C	130	lof_s
75	KCNJ2	C122Y	Clinvar only	Uncertain significance	NA	Cardiovascular phenotype	122	C	130	lof_f
18	KCNJ2	C154F	Clinvar only	Uncertain significance	NA	Congenital long QT syndrome	154	C	162	lof_s
52	KCNJ2	C154F	Clinvar only	Uncertain significance	NA	Congenital long QT syndrome	154	C	162	lof_f
46	KCNJ2	C154Y	Clinvar only	Conflicting interpretations of pathogenicity	NA	Andersen Tawil syndrome|Andersen Tawil syndrome|Short QT syndrome 3	154	C	162	lof_s
3	KCNJ2	C356F	Clinvar & Gnomad	Uncertain significance	658326	Short QT syndrome 3|Andersen Tawil syndrome	356	C	364	gof_s
4	KCNJ2	C76G	Clinvar only	Conflicting interpretations of pathogenicity	NA	Andersen Tawil syndrome|Short QT syndrome 3|not provided	76	C	76	gof_s
55	KCNJ2	C76G	Clinvar only	Conflicting interpretations of pathogenicity	NA	Andersen Tawil syndrome|Short QT syndrome 3|not provided	76	C	76	lof_f
10	KCNJ2	D274V	Clinvar only	Uncertain significance	NA	not provided	274	D	282	gof_s
27	KCNJ2	E125K	Clinvar only	Uncertain significance	NA	Andersen Tawil syndrome|Short QT syndrome 3	125	E	133	lof_s
28	KCNJ2	E303K	Clinvar only	Uncertain significance	NA	Congenital long QT syndrome	303	E	311	lof_s
29	KCNJ2	E349K	Clinvar & Gnomad	Uncertain significance	190818	not provided|Short QT syndrome 3|Andersen Tawil syndrome	349	E	357	lof_s
15	KCNJ2	G146D	Clinvar only	Uncertain significance	NA	Andersen Tawil syndrome|Short QT syndrome 3|Congenital long QT syndrome	146	G	154	lof_s
38	KCNJ2	G146R	Clinvar only	Uncertain significance	NA	not provided	146	G	154	lof_s
66	KCNJ2	G146R	Clinvar only	Uncertain significance	NA	not provided	146	G	154	lof_f
39	KCNJ2	G18S	Clinvar & Gnomad	Uncertain significance	536360	Andersen Tawil syndrome|Short QT syndrome 3	18	G	18	lof_s
7	KCNJ2	G206S	Clinvar & Gnomad	Uncertain significance	281601	Short QT syndrome 3|Andersen Tawil syndrome|not specified|not provided	206	G	214	gof_s
43	KCNJ2	G52V	Clinvar only	Uncertain significance	NA	not specified	52	G	52	lof_s
73	KCNJ2	G52V	Clinvar only	Uncertain significance	NA	not specified	52	G	52	lof_f
44	KCNJ2	H110Y	Clinvar only	Uncertain significance	NA	not provided	110	H	110	lof_s
74	KCNJ2	H110Y	Clinvar only	Uncertain significance	NA	not provided	110	H	110	lof_f
31	KCNJ2	I137N	Clinvar only	Uncertain significance	NA	Short QT syndrome 3|Andersen Tawil syndrome	137	I	145	lof_s
70	KCNJ2	I261V	Clinvar & Gnomad	Uncertain significance	691668	Hypertrophic cardiomyopathy|Andersen Tawil syndrome|Short QT syndrome 3|not provided	261	I	269	lof_f
42	KCNJ2	I267V	Clinvar & Gnomad	Uncertain significance	1012428	not provided	267	I	275	lof_s
9	KCNJ2	K120T	Clinvar & Gnomad	Uncertain significance	432434	not provided|Andersen Tawil syndrome|Short QT syndrome 3	120	K	128	gof_s
33	KCNJ2	K34N	Clinvar & Gnomad	Uncertain significance	NA	Andersen Tawil syndrome	34	K	34	lof_s
34	KCNJ2	L109P	Clinvar only	Uncertain significance	NA	Short QT syndrome 3|Andersen Tawil syndrome	109	L	109	lof_s
64	KCNJ2	L109P	Clinvar only	Uncertain significance	NA	Short QT syndrome 3|Andersen Tawil syndrome	109	L	109	lof_f
6	KCNJ2	L217P	Clinvar only	Uncertain significance	NA	Congenital long QT syndrome	217	L	225	gof_s
65	KCNJ2	L217P	Clinvar only	Uncertain significance	NA	Congenital long QT syndrome	217	L	225	lof_f
11	KCNJ2	L282W	Clinvar & Gnomad	Uncertain significance	468468	Short QT syndrome 3|Andersen Tawil syndrome|Atrial fibrillation, familial, 9|Andersen Tawil syndrome|Short QT syndrome 3	282	L	290	gof_f
62	KCNJ2	M301L	Clinvar only	Conflicting interpretations of pathogenicity	NA	not provided|Short QT syndrome 3|Andersen Tawil syndrome	301	M	309	lof_f
71	KCNJ2	M301V	Clinvar & Gnomad	Conflicting interpretations of pathogenicity	190816	not provided|Andersen Tawil syndrome|Short QT syndrome 3	301	M	309	lof_f
25	KCNJ2	M307I	Clinvar only	Uncertain significance	NA	Congenital long QT syndrome	307	M	315	lof_s
61	KCNJ2	M307I	Clinvar only	Uncertain significance	NA	Congenital long QT syndrome	307	M	315	lof_f
72	KCNJ2	M307V	Clinvar only	Conflicting interpretations of pathogenicity	NA	Cardiovascular phenotype|Short QT syndrome 3|Andersen Tawil syndrome	307	M	315	lof_f
58	KCNJ2	N190I	Clinvar only	Uncertain significance	NA	Andersen Tawil syndrome|Short QT syndrome 3	190	N	198	lof_f
60	KCNJ2	N216I	Clinvar only	Uncertain significance	NA	Short QT syndrome 3|Andersen Tawil syndrome	216	N	224	lof_f
8	KCNJ2	N28S	Clinvar only	Uncertain significance	NA	Brugada syndrome	28	N	28	gof_s
69	KCNJ2	R189T	Clinvar only	Uncertain significance	NA	Andersen Tawil syndrome|Short QT syndrome 3	189	R	197	lof_f
48	KCNJ2	R260C	Clinvar only	Uncertain significance	NA	not provided	260	R	268	lof_f
56	KCNJ2	R312H	Clinvar only	Conflicting interpretations of pathogenicity	NA	Andersen Tawil syndrome|Short QT syndrome 3|not provided	312	R	320	lof_f
2	KCNJ2	R325C	Clinvar & Gnomad	Uncertain significance	190821	Ventricular fibrillation|Andersen Tawil syndrome|Short QT syndrome 3|Andersen Tawil syndrome|not provided	325	R	333	gof_s
5	KCNJ2	R325H	Clinvar only	Uncertain significance	NA	not provided	325	R	333	gof_s
36	KCNJ2	R40P	Clinvar only	Uncertain significance	NA	Short QT syndrome 3|Andersen Tawil syndrome	40	R	40	lof_s
37	KCNJ2	R5Q	Clinvar & Gnomad	Uncertain significance	1052929	Andersen Tawil syndrome|Short QT syndrome 3	5	R	5	lof_s
14	KCNJ2	R80C	Clinvar only	Uncertain significance	NA	Andersen Tawil syndrome|Short QT syndrome 3	80	R	80	lof_s
50	KCNJ2	R80C	Clinvar only	Uncertain significance	NA	Andersen Tawil syndrome|Short QT syndrome 3	80	R	80	lof_f
49	KCNJ2	R8C	Clinvar & Gnomad	Uncertain significance	890665	Short QT syndrome 3|Andersen Tawil syndrome|Short QT syndrome 3|Atrial fibrillation, familial, 9|Andersen Tawil syndrome	8	R	8	lof_f
22	KCNJ2	R8H	Clinvar & Gnomad	Uncertain significance	844830	Andersen Tawil syndrome|Short QT syndrome 3	8	R	8	lof_s
35	KCNJ2	S116P	Clinvar only	Uncertain significance	NA	not provided	116	S	124	lof_s
17	KCNJ2	S136F	Clinvar only	Uncertain significance	NA	Congenital long QT syndrome	136	S	144	lof_s
51	KCNJ2	S136F	Clinvar only	Uncertain significance	NA	Congenital long QT syndrome	136	S	144	lof_f
63	KCNJ2	S220N	Clinvar only	Uncertain significance	NA	Andersen Tawil syndrome|Short QT syndrome 3	220	S	228	lof_f
19	KCNJ2	S314F	Clinvar only	Uncertain significance	NA	not provided	314	S	322	lof_s
12	KCNJ2	T130A	Clinvar only	Uncertain significance	NA	Andersen Tawil syndrome	130	T	138	lof_s
30	KCNJ2	T130M	Clinvar & Gnomad	Uncertain significance	969996	not provided|Short QT syndrome 3|Andersen Tawil syndrome	130	T	138	lof_s
23	KCNJ2	T139I	Clinvar only	Uncertain significance	NA	Short QT syndrome 3|Andersen Tawil syndrome|not provided	139	T	147	lof_s
57	KCNJ2	T139I	Clinvar only	Uncertain significance	NA	Short QT syndrome 3|Andersen Tawil syndrome|not provided	139	T	147	lof_f
24	KCNJ2	T192I	Clinvar only	Uncertain significance	NA	Congenital long QT syndrome	192	T	200	lof_s
59	KCNJ2	T192I	Clinvar only	Uncertain significance	NA	Congenital long QT syndrome	192	T	200	lof_f
47	KCNJ2	T74A	Clinvar only	Uncertain significance	NA	Congenital long QT syndrome	74	T	74	lof_f
13	KCNJ2	T75A	Clinvar only	Uncertain significance	NA	Congenital long QT syndrome	75	T	75	lof_s
21	KCNJ2	V123G	Clinvar only	Uncertain significance	NA	Congenital long QT syndrome	123	V	131	lof_s
53	KCNJ2	V123G	Clinvar only	Uncertain significance	NA	Congenital long QT syndrome	123	V	131	lof_f
54	KCNJ2	V223G	Clinvar only	Uncertain significance	NA	Short QT syndrome 3|Andersen Tawil syndrome	223	V	231	lof_f
1	KCNJ2	V295A	Clinvar only	Uncertain significance	NA	not provided	295	V	303	gof_s
20	KCNJ2	V86F	Clinvar only	Uncertain significance	NA	not provided	86	V	86	lof_s
26	KCNJ2	V93I	Clinvar & Gnomad	Conflicting interpretations of pathogenicity	30121	Atrial fibrillation|Short QT syndrome 3|Andersen Tawil syndrome|not provided|Atrial fibrillation, familial, 9|Andersen Tawil syndrome|Short QT syndrome 3	93	V	93	lof_s
32	KCNJ2	Y326N	Clinvar only	Uncertain significance	NA	not provided	326	Y	334	lof_s
16	KCNJ2	Y68D	Clinvar only	Uncertain significance	NA	Congenital long QT syndrome	68	Y	68	lof_s
