# Supplementary material for: Determinants of trafficking, conduction, and disease within a K+ channel revealed through multiparametric deep mutational scanning
Source: eLife. 2022 May 31;11:e76903. doi: 10.7554/eLife.76903 (PMC9273215; doi:10.7554/eLife.76903)
Supplement: Supplementary file 4. — For all inward rectifier variants listed in ClinVar (as of March 25, 2022) with pathogenic or conflicting interpretation, we predicted mechanism underlying the variants disease phenotype (‘predicted_phenotype’): 'lof_s': loss of surface expression; 'gof_s': gain of surface expression; 'lof_f': loss of function (conduction); 'gof_f': gain of function (conduction). [file elife-76903-supp4.csv]

Supplemental File 4: Predicted Mechanism of Pathogenic / Conflicting Interpretation Inward Rectifier Variants
predicted phenotype
lof_s	loss of surface expression
gof_s	gain of surface expression
lof_f	loss of function (conduction)
gof_f	gain of function (conduction)
kir21_resno	Corresponding Residue Number in KCNJ2 (Kir2.1)
kir21_resid	Corresponding Amino Acid in KCNJ2 (Kir2.1)
kir21_FLAG_resno	Corresponding Residue Number in KCNJ2 (Kir2.1) with FLAG tag inserted at T115
Variant_ID	Gene	Mutation	Source	Clinical_Significance	ClinVar_ID	Condition	kir21_resno	kir21_resid	kir21_FLAG_resno	predicted_phenotype
1	KCNJ11	E227K	Clinvar & Gnomad	Pathogenic	158682	Maturity-onset diabetes of the young, type 13|not provided|Diabetes mellitus|Transient neonatal diabetes mellitus 3	239	E	247	p_gof_s
2	KCNJ5	E246K	Clinvar & Gnomad	Pathogenic	135681	Familial hyperaldosteronism type 3	239	E	247	p_gof_s
3	KCNJ11	E229K	Clinvar only	Pathogenic	NA	Diabetes mellitus	241	E	249	p_gof_s
4	KCNJ18	A200P	Clinvar only	Pathogenic	NA	Thyrotoxic periodic paralysis, susceptibility to, 1	199	A	207	p_gof_s
5	KCNJ10	R65P	Clinvar only	Pathogenic	NA	Renal tubular dysfunction|Bilateral sensorineural hearing impairment|Cerebellar ataxia|Spastic diplegia|Microcephaly|EAST syndrome	82	R	82	p_gof_s
6	KCNJ16	I132R	Clinvar & Gnomad	Pathogenic	1174518	HYPOKALEMIC TUBULOPATHY AND DEAFNESS	143	I	151	p_gof_s
7	KCNJ5	I144V	Clinvar & Gnomad	Conflicting interpretations of pathogenicity	303628	Congenital long QT syndrome|Long QT syndrome|Familial hyperaldosteronism type 3	137	I	145	p_gof_s
8	KCNJ5	T158A	Clinvar only	Pathogenic	NA	Aldosterone-producing adrenal adenoma, somatic|Familial hyperaldosteronism type 3|Andersen Tawil syndrome	151	T	159	p_lof_s
9	KCNJ11	E179A	Clinvar only	Pathogenic	NA	Neonatal insulin-dependent diabetes mellitus	191	E	199	p_lof_s
10	KCNJ1	R188C	Clinvar & Gnomad	Conflicting interpretations of pathogenicity	225398	not specified|Bartter syndrome, type 2, antenatal	189	R	197	p_lof_s
11	KCNJ11	R201C	Clinvar only	Pathogenic	NA	Diabetes mellitus|Permanent neonatal diabetes mellitus|Permanent neonatal diabetes mellitus 2|Transient neonatal diabetes mellitus 3	213	R	221	p_lof_s
12	KCNJ11	R34C	Clinvar & Gnomad	Pathogenic	557416	Permanent neonatal diabetes mellitus|Transient neonatal diabetes mellitus 3|Hyperinsulinemic hypoglycemia, familial, 2	46	R	46	p_lof_s
13	KCNJ11	R54C	Clinvar & Gnomad	Pathogenic	447634	not provided	67	R	67	p_lof_s
14	KCNJ11	G53D	Clinvar only	Pathogenic	NA	Permanent neonatal diabetes mellitus|Permanent neonatal diabetes mellitus 2	65	G	65	p_lof_s
15	KCNJ5	G151E	Clinvar only	Pathogenic	NA	Long QT syndrome|Familial hyperaldosteronism type 3	144	G	152	p_lof_s
16	KCNJ10	D245E	Clinvar & Gnomad	Conflicting interpretations of pathogenicity	205815	EAST syndrome|Deafness, autosomal recessive 4, with enlarged vestibular aqueduct|not specified|not provided	259	D	267	p_lof_s
42	KCNJ2	C154Y	Clinvar only	Conflicting interpretations of pathogenicity	NA	Andersen Tawil syndrome|Andersen Tawil syndrome|Short QT syndrome 3	154	C	162	p_lof_s
17	KCNJ2	C54F	Clinvar only	Pathogenic	NA	Andersen Tawil syndrome|Familial periodic paralysis	54	C	54	p_lof_s
19	KCNJ11	R201H	Clinvar only	Pathogenic	NA	Permanent neonatal diabetes mellitus|Permanent neonatal diabetes mellitus 2|not provided|Neonatal insulin-dependent diabetes mellitus|Transient neonatal diabetes mellitus 3	213	R	221	p_lof_s
20	KCNJ13	S105I	Clinvar only	Pathogenic	NA	Leber congenital amaurosis 16	128	S	136	p_lof_s
21	KCNJ16	T64I	Clinvar & Gnomad	Pathogenic	1174521	HYPOKALEMIC TUBULOPATHY AND DEAFNESS	75	T	75	p_lof_s
55	KCNJ2	C54F	Clinvar only	Pathogenic	NA	Andersen Tawil syndrome|Familial periodic paralysis	54	C	54	p_lof_f
40	KCNJ2	D71V	Clinvar only	Pathogenic	NA	Andersen Tawil syndrome|Congenital long QT syndrome	71	D	71	p_lof_s
24	KCNJ11	E282K	Clinvar & Gnomad	Pathogenic	8686	Hyperinsulinemic hypoglycemia, familial, 2|Maturity-onset diabetes of the young, type 13|Hyperinsulinemic hypoglycemia, familial, 2|Transient neonatal diabetes mellitus 3|Type 2 diabetes mellitus|Permanent neonatal diabetes mellitus	293	E	301	p_lof_s
44	KCNJ2	D78Y	Clinvar only	Pathogenic	NA	Andersen Tawil syndrome|Short QT syndrome 3|Congenital long QT syndrome	78	D	78	p_lof_s
26	KCNJ11	R201L	Clinvar only	Pathogenic	NA	Permanent neonatal diabetes mellitus	213	R	221	p_lof_s
27	KCNJ11	K170N	Clinvar only	Pathogenic	NA	Permanent neonatal diabetes mellitus|Permanent neonatal diabetes mellitus 2	182	K	190	p_lof_s
28	KCNJ11	L122P	Clinvar only	Pathogenic	NA	Hyperinsulinemic hypoglycemia, familial, 2	134	L	142	p_lof_s
83	KCNJ2	D78Y	Clinvar only	Pathogenic	NA	Andersen Tawil syndrome|Short QT syndrome 3|Congenital long QT syndrome	78	D	78	p_lof_f
34	KCNJ2	G144S	Clinvar only	Pathogenic	NA	Andersen Tawil syndrome|Short QT syndrome 3|Congenital long QT syndrome	144	G	152	p_lof_s
31	KCNJ5	G151R	Clinvar only	Pathogenic	NA	not provided	144	G	152	p_lof_s
32	KCNJ5	G151R	Clinvar only	Pathogenic	NA	Familial hyperaldosteronism type 3|Aldosterone-producing adrenal adenoma, somatic|not provided	144	G	152	p_lof_s
33	KCNJ10	C140R	Clinvar only	Pathogenic	NA	EAST syndrome	154	C	162	p_lof_s
76	KCNJ2	G144S	Clinvar only	Pathogenic	NA	Andersen Tawil syndrome|Short QT syndrome 3|Congenital long QT syndrome	144	G	152	p_lof_f
35	KCNJ6	G154S	Clinvar only	Pathogenic	NA	Keppen-Lubinsky syndrome	144	G	152	p_lof_s
36	KCNJ2	L222S	Clinvar only	Pathogenic	NA	not provided	222	L	230	p_lof_s
37	KCNJ1	A198T	Clinvar only	Pathogenic	NA	Bartter syndrome, type 2, antenatal	199	A	207	p_lof_s
38	KCNJ11	A172V	Clinvar only	Pathogenic	NA	not provided	184	A	192	p_lof_s
39	KCNJ11	F35V	Clinvar only	Pathogenic	NA	Permanent neonatal diabetes mellitus	47	F	47	p_lof_s
66	KCNJ2	M301L	Clinvar only	Conflicting interpretations of pathogenicity	NA	not provided|Short QT syndrome 3|Andersen Tawil syndrome	301	M	309	p_lof_f
80	KCNJ2	M301V	Clinvar & Gnomad	Conflicting interpretations of pathogenicity	190816	not provided|Andersen Tawil syndrome|Short QT syndrome 3	301	M	309	p_lof_f
81	KCNJ2	M307V	Clinvar only	Conflicting interpretations of pathogenicity	NA	Cardiovascular phenotype|Short QT syndrome 3|Andersen Tawil syndrome	307	M	315	p_lof_f
43	KCNJ11	F60Y	Clinvar only	Pathogenic	NA	Permanent neonatal diabetes mellitus 2	73	F	73	p_lof_s
58	KCNJ2	N216H	Clinvar only	Pathogenic	NA	Andersen Tawil syndrome|Congenital long QT syndrome	216	N	224	p_lof_f
45	KCNJ5	T158A	Clinvar only	Pathogenic	NA	Aldosterone-producing adrenal adenoma, somatic|Familial hyperaldosteronism type 3|Andersen Tawil syndrome	151	T	159	p_lof_f
25	KCNJ2	P186L	Clinvar only	Pathogenic	NA	Andersen Tawil syndrome|Congenital long QT syndrome	186	P	194	p_lof_s
56	KCNJ2	R189G	Clinvar only	Pathogenic	NA	not provided	189	R	197	p_lof_f
63	KCNJ2	R189I	Clinvar only	Pathogenic	NA	not provided|Congenital long QT syndrome	189	R	197	p_lof_f
49	KCNJ11	R136C	Clinvar & Gnomad	Pathogenic	435558	Hyperinsulinemic hypoglycemia, familial, 2	148	R	156	p_lof_f
50	KCNJ16	R137C	Clinvar & Gnomad	Pathogenic	1174516	HYPOKALEMIC TUBULOPATHY AND DEAFNESS	148	R	156	p_lof_f
51	KCNJ11	R201C	Clinvar only	Pathogenic	NA	Diabetes mellitus|Permanent neonatal diabetes mellitus|Permanent neonatal diabetes mellitus 2|Transient neonatal diabetes mellitus 3	213	R	221	p_lof_f
52	KCNJ11	R34C	Clinvar & Gnomad	Pathogenic	557416	Permanent neonatal diabetes mellitus|Transient neonatal diabetes mellitus 3|Hyperinsulinemic hypoglycemia, familial, 2	46	R	46	p_lof_f
53	KCNJ11	G53D	Clinvar only	Pathogenic	NA	Permanent neonatal diabetes mellitus|Permanent neonatal diabetes mellitus 2	65	G	65	p_lof_f
54	KCNJ1	G167E	Clinvar & Gnomad	Pathogenic	9160	Bartter syndrome, type 2, antenatal	168	G	176	p_lof_f
23	KCNJ2	R189K	Clinvar only	Pathogenic	NA	not provided	189	R	197	p_lof_s
64	KCNJ2	R189K	Clinvar only	Pathogenic	NA	not provided	189	R	197	p_lof_f
57	KCNJ1	D108H	Clinvar only	Pathogenic	NA	Bartter syndrome, type 2, antenatal	112	D	112	p_lof_f
18	KCNJ2	R213G	Clinvar only	Pathogenic	NA	not provided	213	R	221	p_lof_s
59	KCNJ11	R206H	Clinvar only	Pathogenic	NA	Hyperinsulinemic hypoglycemia, familial, 2	218	R	226	p_lof_f
60	KCNJ11	R301H	Clinvar & Gnomad	Conflicting interpretations of pathogenicity	8683	Maturity-onset diabetes of the young, type 13|Hyperinsulinemic hypoglycemia, familial, 2|Transient neonatal diabetes mellitus 3|Permanent neonatal diabetes mellitus|not provided|Transient neonatal diabetes mellitus 3|Hyperinsulinemic hypoglycemia, familial, 2	312	R	320	p_lof_f
29	KCNJ2	R218P	Clinvar only	Pathogenic	NA	not provided	218	R	226	p_lof_s
62	KCNJ13	S105I	Clinvar only	Pathogenic	NA	Leber congenital amaurosis 16	128	S	136	p_lof_f
73	KCNJ2	R218Q	Clinvar only	Pathogenic	NA	not provided|Andersen Tawil syndrome|Andersen Tawil syndrome|Short QT syndrome 3|Congenital long QT syndrome	218	R	226	p_lof_f
61	KCNJ2	R312H	Clinvar only	Conflicting interpretations of pathogenicity	NA	Andersen Tawil syndrome|Short QT syndrome 3|not provided	312	R	320	p_lof_f
65	KCNJ11	R201L	Clinvar only	Pathogenic	NA	Permanent neonatal diabetes mellitus	213	R	221	p_lof_f
41	KCNJ2	R67W	Clinvar only	Pathogenic	NA	Short QT syndrome 3|Andersen Tawil syndrome|Atrial fibrillation, familial, 9|not specified|Congenital long QT syndrome|Short QT syndrome 3|Andersen Tawil syndrome|not provided|Andersen Tawil syndrome	67	R	67	p_lof_s
67	KCNJ18	T140M	Clinvar only	Pathogenic	NA	Thyrotoxic periodic paralysis, susceptibility to, 1	139	T	147	p_lof_f
82	KCNJ2	R67W	Clinvar only	Pathogenic	NA	Short QT syndrome 3|Andersen Tawil syndrome|Atrial fibrillation, familial, 9|not specified|Congenital long QT syndrome|Short QT syndrome 3|Andersen Tawil syndrome|not provided|Andersen Tawil syndrome	67	R	67	p_lof_f
69	KCNJ11	T294M	Clinvar & Gnomad	Pathogenic	211230	Transient neonatal diabetes mellitus 3|Type 2 diabetes mellitus|Hyperinsulinemic hypoglycemia, familial, 2|Permanent neonatal diabetes mellitus 2|Maturity-onset diabetes of the young, type 13|Hyperinsulinemic hypoglycemia, familial, 2|Transient neonatal diabetes mellitus 3|not provided	305	T	313	p_lof_f
70	KCNJ11	T62M	Clinvar & Gnomad	Pathogenic	435559	not specified	75	T	75	p_lof_f
46	KCNJ2	T192A	Clinvar only	Pathogenic	NA	Andersen Tawil syndrome|Congenital long QT syndrome	192	T	200	p_lof_f
47	KCNJ2	T305A	Clinvar only	Pathogenic	NA	Andersen Tawil syndrome|Andersen Tawil syndrome|Short QT syndrome 3|Cardiac arrhythmia	305	T	313	p_lof_f
30	KCNJ2	T305P	Clinvar only	Pathogenic	NA	Andersen Tawil syndrome|Congenital long QT syndrome	305	T	313	p_lof_s
74	KCNJ16	I132R	Clinvar & Gnomad	Pathogenic	1174518	HYPOKALEMIC TUBULOPATHY AND DEAFNESS	143	I	151	p_lof_f
75	KCNJ11	H259R	Clinvar & Gnomad	Pathogenic	8677	Hyperinsulinemic hypoglycemia, familial, 2|not provided	271	H	279	p_lof_f
72	KCNJ2	T305P	Clinvar only	Pathogenic	NA	Andersen Tawil syndrome|Congenital long QT syndrome	305	T	313	p_lof_f
77	KCNJ6	G154S	Clinvar only	Pathogenic	NA	Keppen-Lubinsky syndrome	144	G	152	p_lof_f
78	KCNJ13	I120T	Clinvar & Gnomad	Pathogenic	191155	Leber congenital amaurosis 16|not provided	143	I	151	p_lof_f
79	KCNJ11	A187V	Clinvar only	Pathogenic	NA	Transient neonatal diabetes mellitus 3|Hyperinsulinemic hypoglycemia, familial, 2|Permanent neonatal diabetes mellitus	199	A	207	p_lof_f
71	KCNJ2	T75M	Clinvar only	Pathogenic	NA	not provided|Andersen Tawil syndrome|Short QT syndrome 3|Congenital long QT syndrome	75	T	75	p_lof_f
68	KCNJ2	V302M	Clinvar only	Pathogenic	NA	Andersen Tawil syndrome|Congenital long QT syndrome	302	V	310	p_lof_f
22	KCNJ2	V93I	Clinvar & Gnomad	Conflicting interpretations of pathogenicity	30121	Atrial fibrillation|Short QT syndrome 3|Andersen Tawil syndrome|not provided|Atrial fibrillation, familial, 9|Andersen Tawil syndrome|Short QT syndrome 3	93	V	93	p_lof_s
48	KCNJ2	Y145C	Clinvar only	Pathogenic	NA	Andersen Tawil syndrome|Short QT syndrome 3	145	Y	153	p_lof_f
