# Supplementary material for: Determinants of trafficking, conduction, and disease within a K+ channel revealed through multiparametric deep mutational scanning
Source: eLife. 2022 May 31;11:e76903. doi: 10.7554/eLife.76903 (PMC9273215; doi:10.7554/eLife.76903)
Supplement: Supplementary file 5. — Read statistics for each sequenced variant pool (‘sample’). ‘Unexpected/expected mutations’ is the fraction of mutations that was not encoded in the OLS pool; only expected mutations were used in the analysis. [file elife-76903-supp5.csv]

Supplementary File 5: NGS read and alignment statistics
Sample	Barcode sequence	PF Clusters	% of the lane	% Perfect barcode	% One mismatch barcode	Yield (Mbases)	% PF Clusters	% >= Q30 bases	Mean Quality Score	Unexpected/Expected Mutations
dms_baseline	CGTACTAG+AGAGGATA	17,942,041	1.78	95.35	4.65	5,418	100	90.5	35.34	0.33
dms_function_high1	GTAGAGGA+ATAGAGAG	14,044,823	1.39	95.15	4.85	4,242	100	87.22	34.64	0.34
dms_function_high2	TAAGGCGA+AGAGGATA	18,810,378	1.86	96.5	3.5	5,681	100	89.08	35.01	0.3
dms_function_low1	CGAGGCTG+ATAGAGAG	14,199,546	1.41	97.46	2.54	4,288	100	88.63	34.99	0.31
dms_function_low2	GGAGCTAC+ATAGAGAG	14,903,201	1.48	95.74	4.26	4,501	100	89.28	35.1	0.29
dms_function_neg1	TAGGCATG+ATAGAGAG	15,073,953	1.49	97.14	2.86	4,552	100	91.1	35.45	0.26
dms_function_neg2	ACTCGCTA+ATAGAGAG	16,560,022	1.64	95.44	4.56	5,001	100	89.56	35.14	0.28
dms_surface_high1	TCCTGAGC+ATAGAGAG	15,200,690	1.51	96.22	3.78	4,591	100	90.8	35.37	0.26
dms_surface_high2	TAGGCATG+AGAGGATA	14,882,582	0.147	97.33	2.67	4,495	100	90.87	35.4	0.24
dms_surface_low1	CGTACTAG+ATAGAGAG	16,320,952	1.62	93.92	6.08	4,929	100	88.75	34.98	0.31
dms_surface_low2	TCCTGAGC+AGAGGATA	17,274,356	1.71	97.2	2.8	5,217	100	90.98	35.42	0.25
dms_surface_neg1	TAAGGCGA+ATAGAGAG	18,343,213	1.82	94.16	5.84	5,540	100	87.59	34.73	0.37
dms_surface_neg2	AGGCAGAA+AGAGGATA	20,844,383	2.07	96.24	3.76	6,295	100	90.49	35.31	0.29
dms_surface_up1	AGGCAGAA+ATAGAGAG	16,105,434	1.6	94.92	5.08	4,864	100	89.01	35.01	0.3
dms_surface_up2	GGACTCCT+AGAGGATA	16,752,187	1.66	97.54	2.46	5,059	100	90.65	35.36	0.25
