# Supplementary figures and images for: Determinants of trafficking, conduction, and disease within a K+ channel revealed through multiparametric deep mutational scanning
Source: eLife journal article supplement (doi:10.7554/elife.76903), 2022-05-31

Fig4c

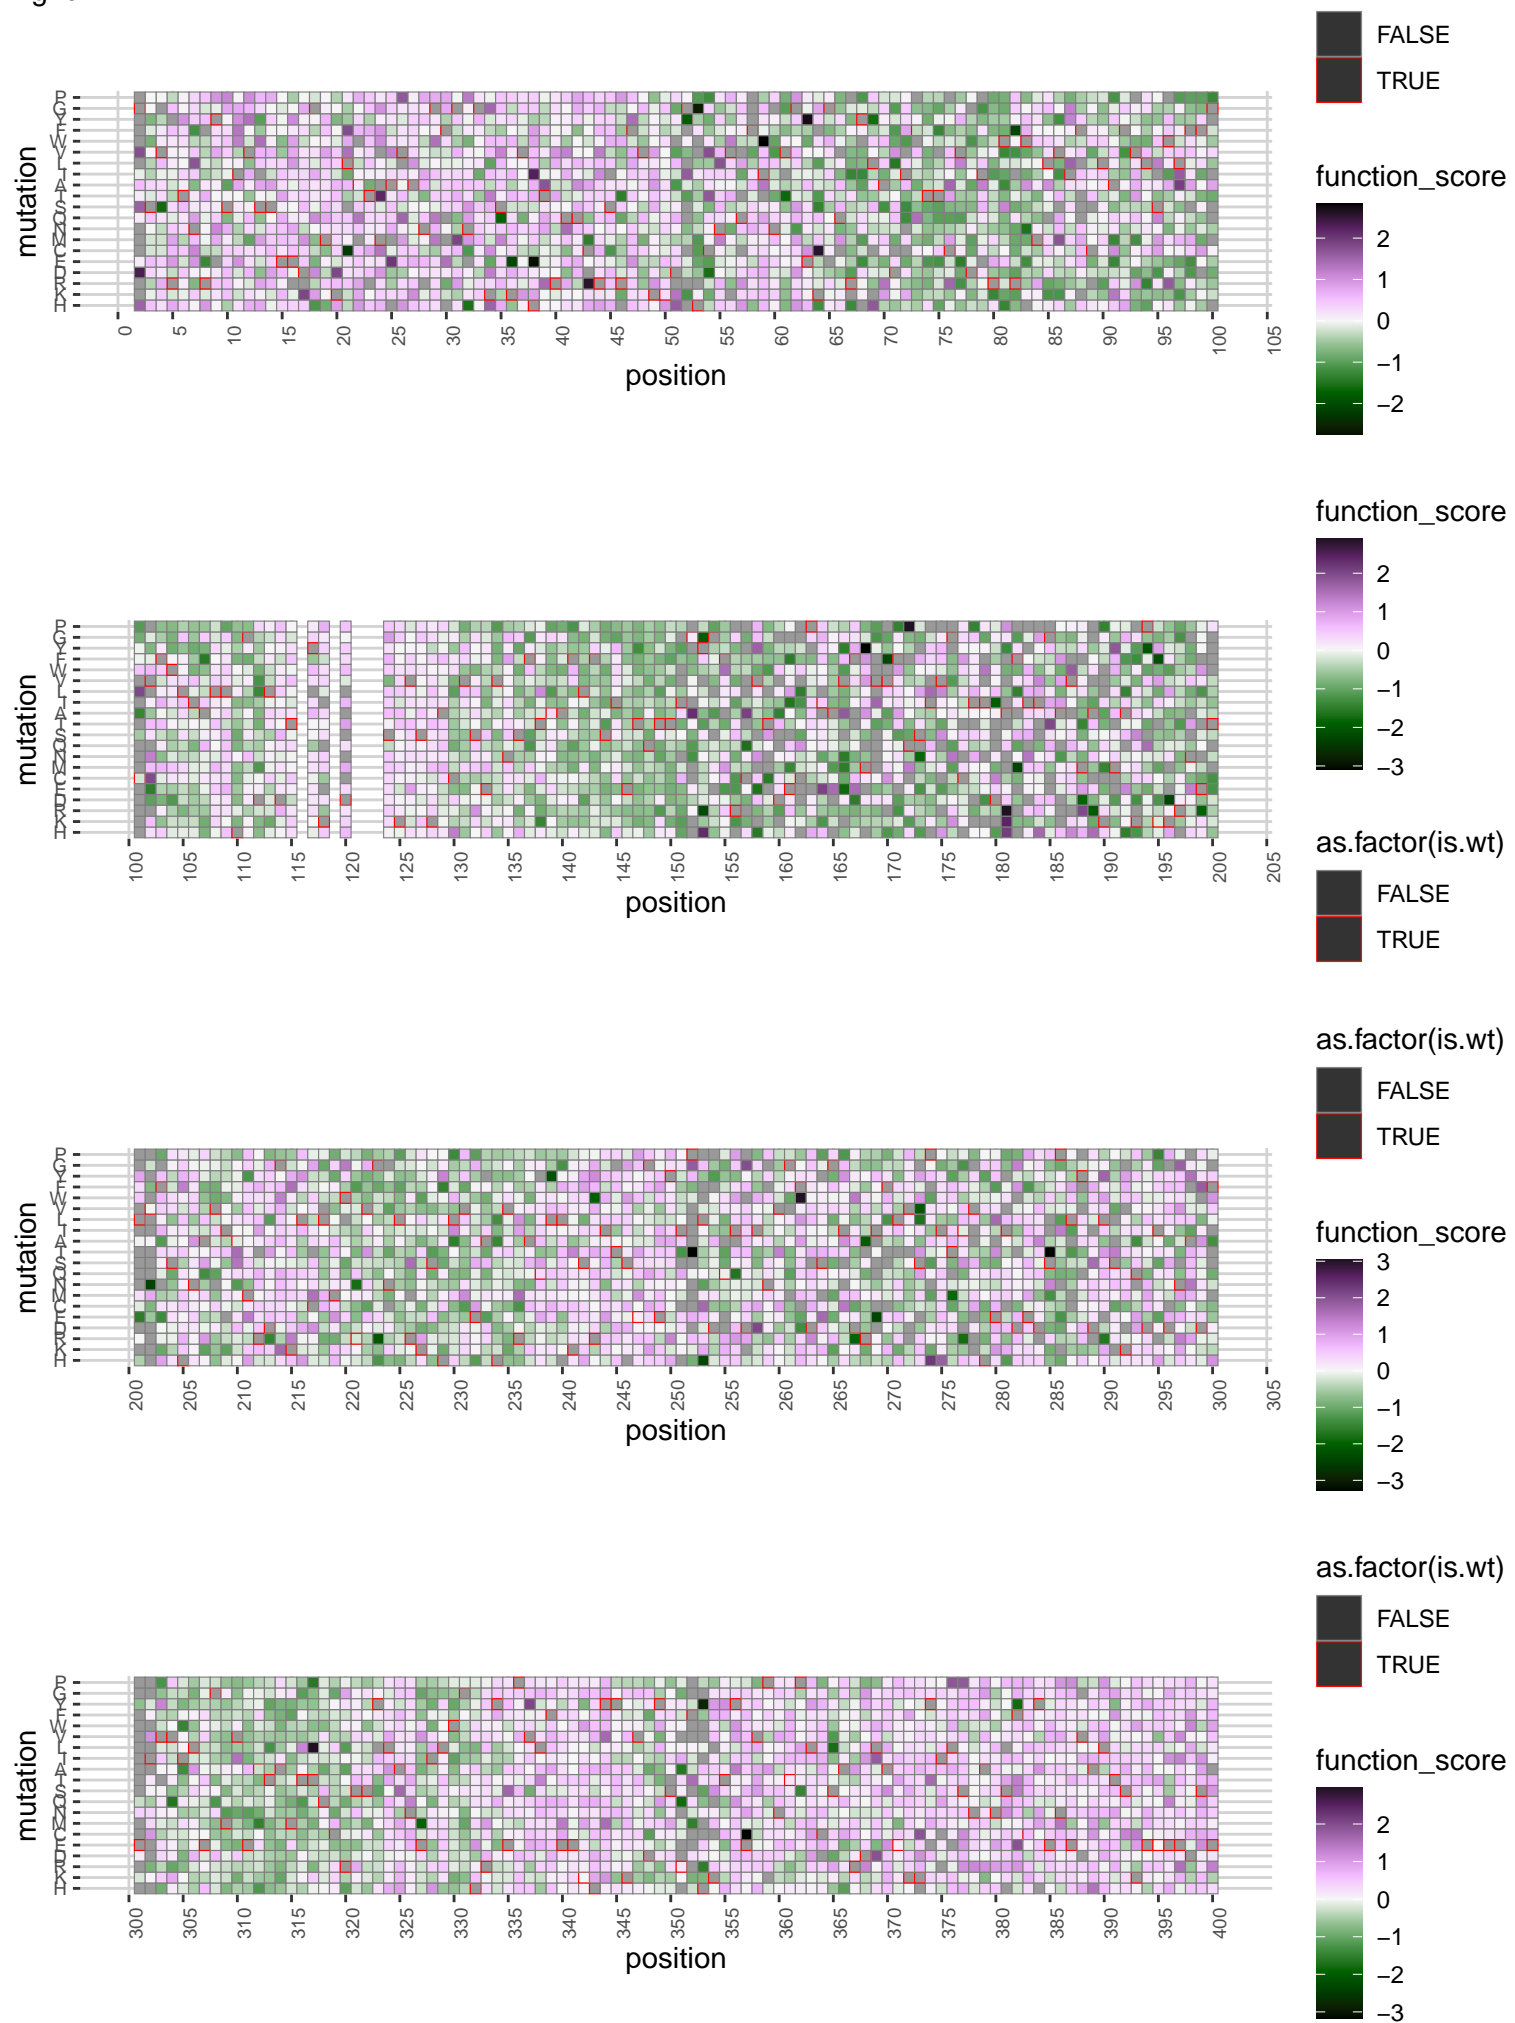

Supplement: data1 [file elife-76903-data1-v2.zip]

Fig5c

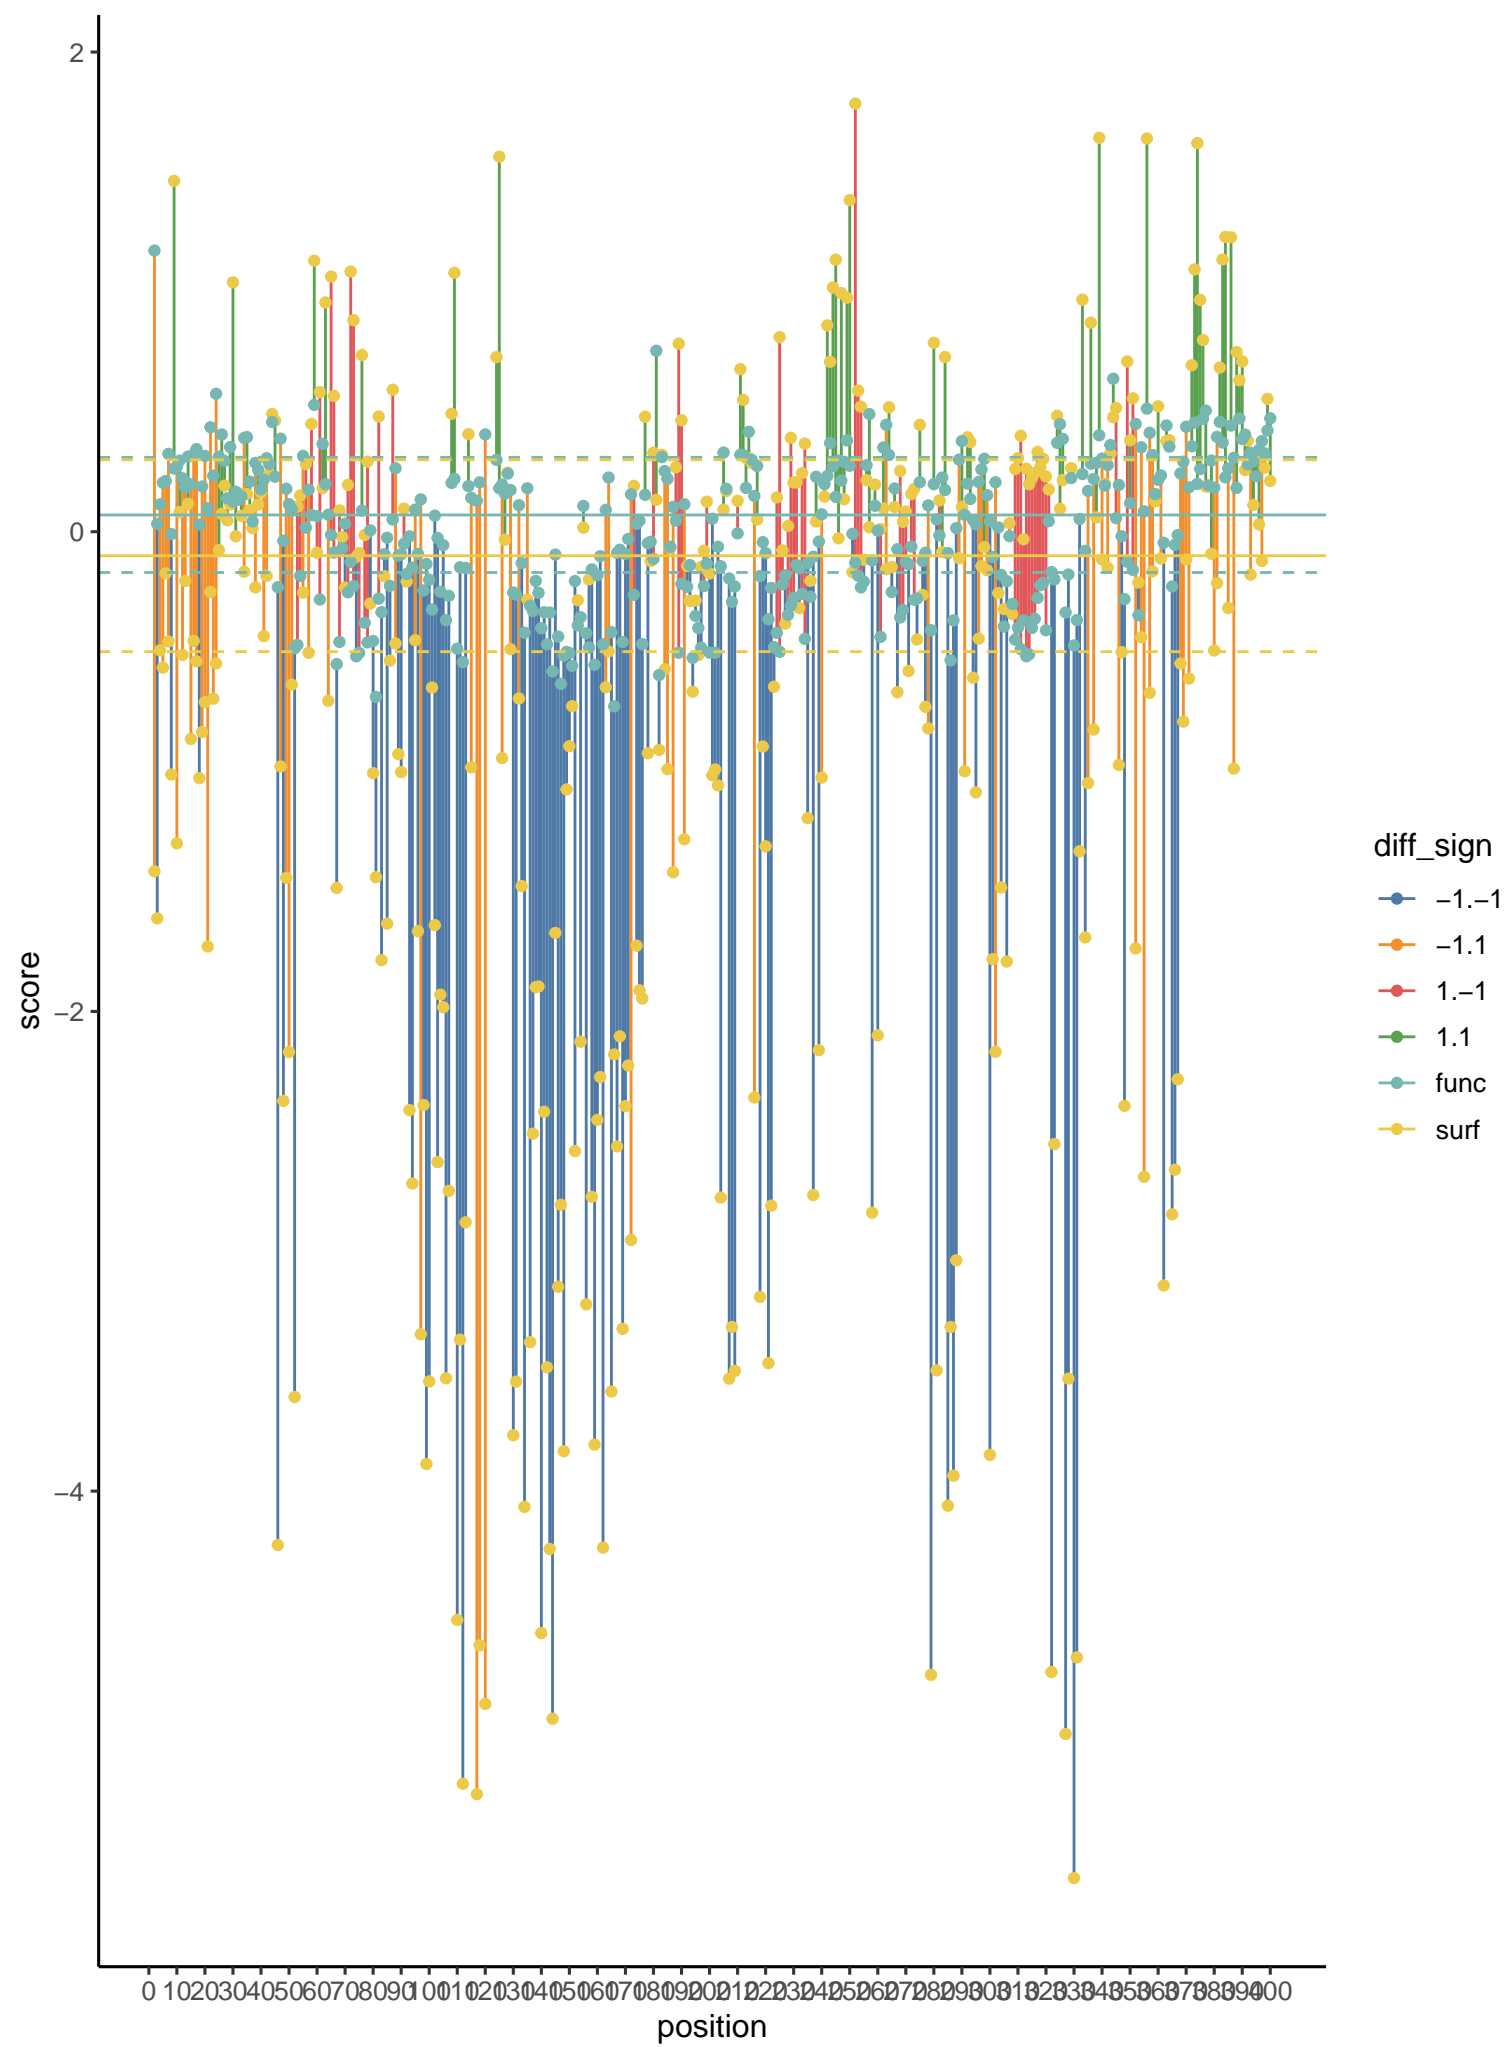

Supplement: data1 [file elife-76903-data1-v2.zip]

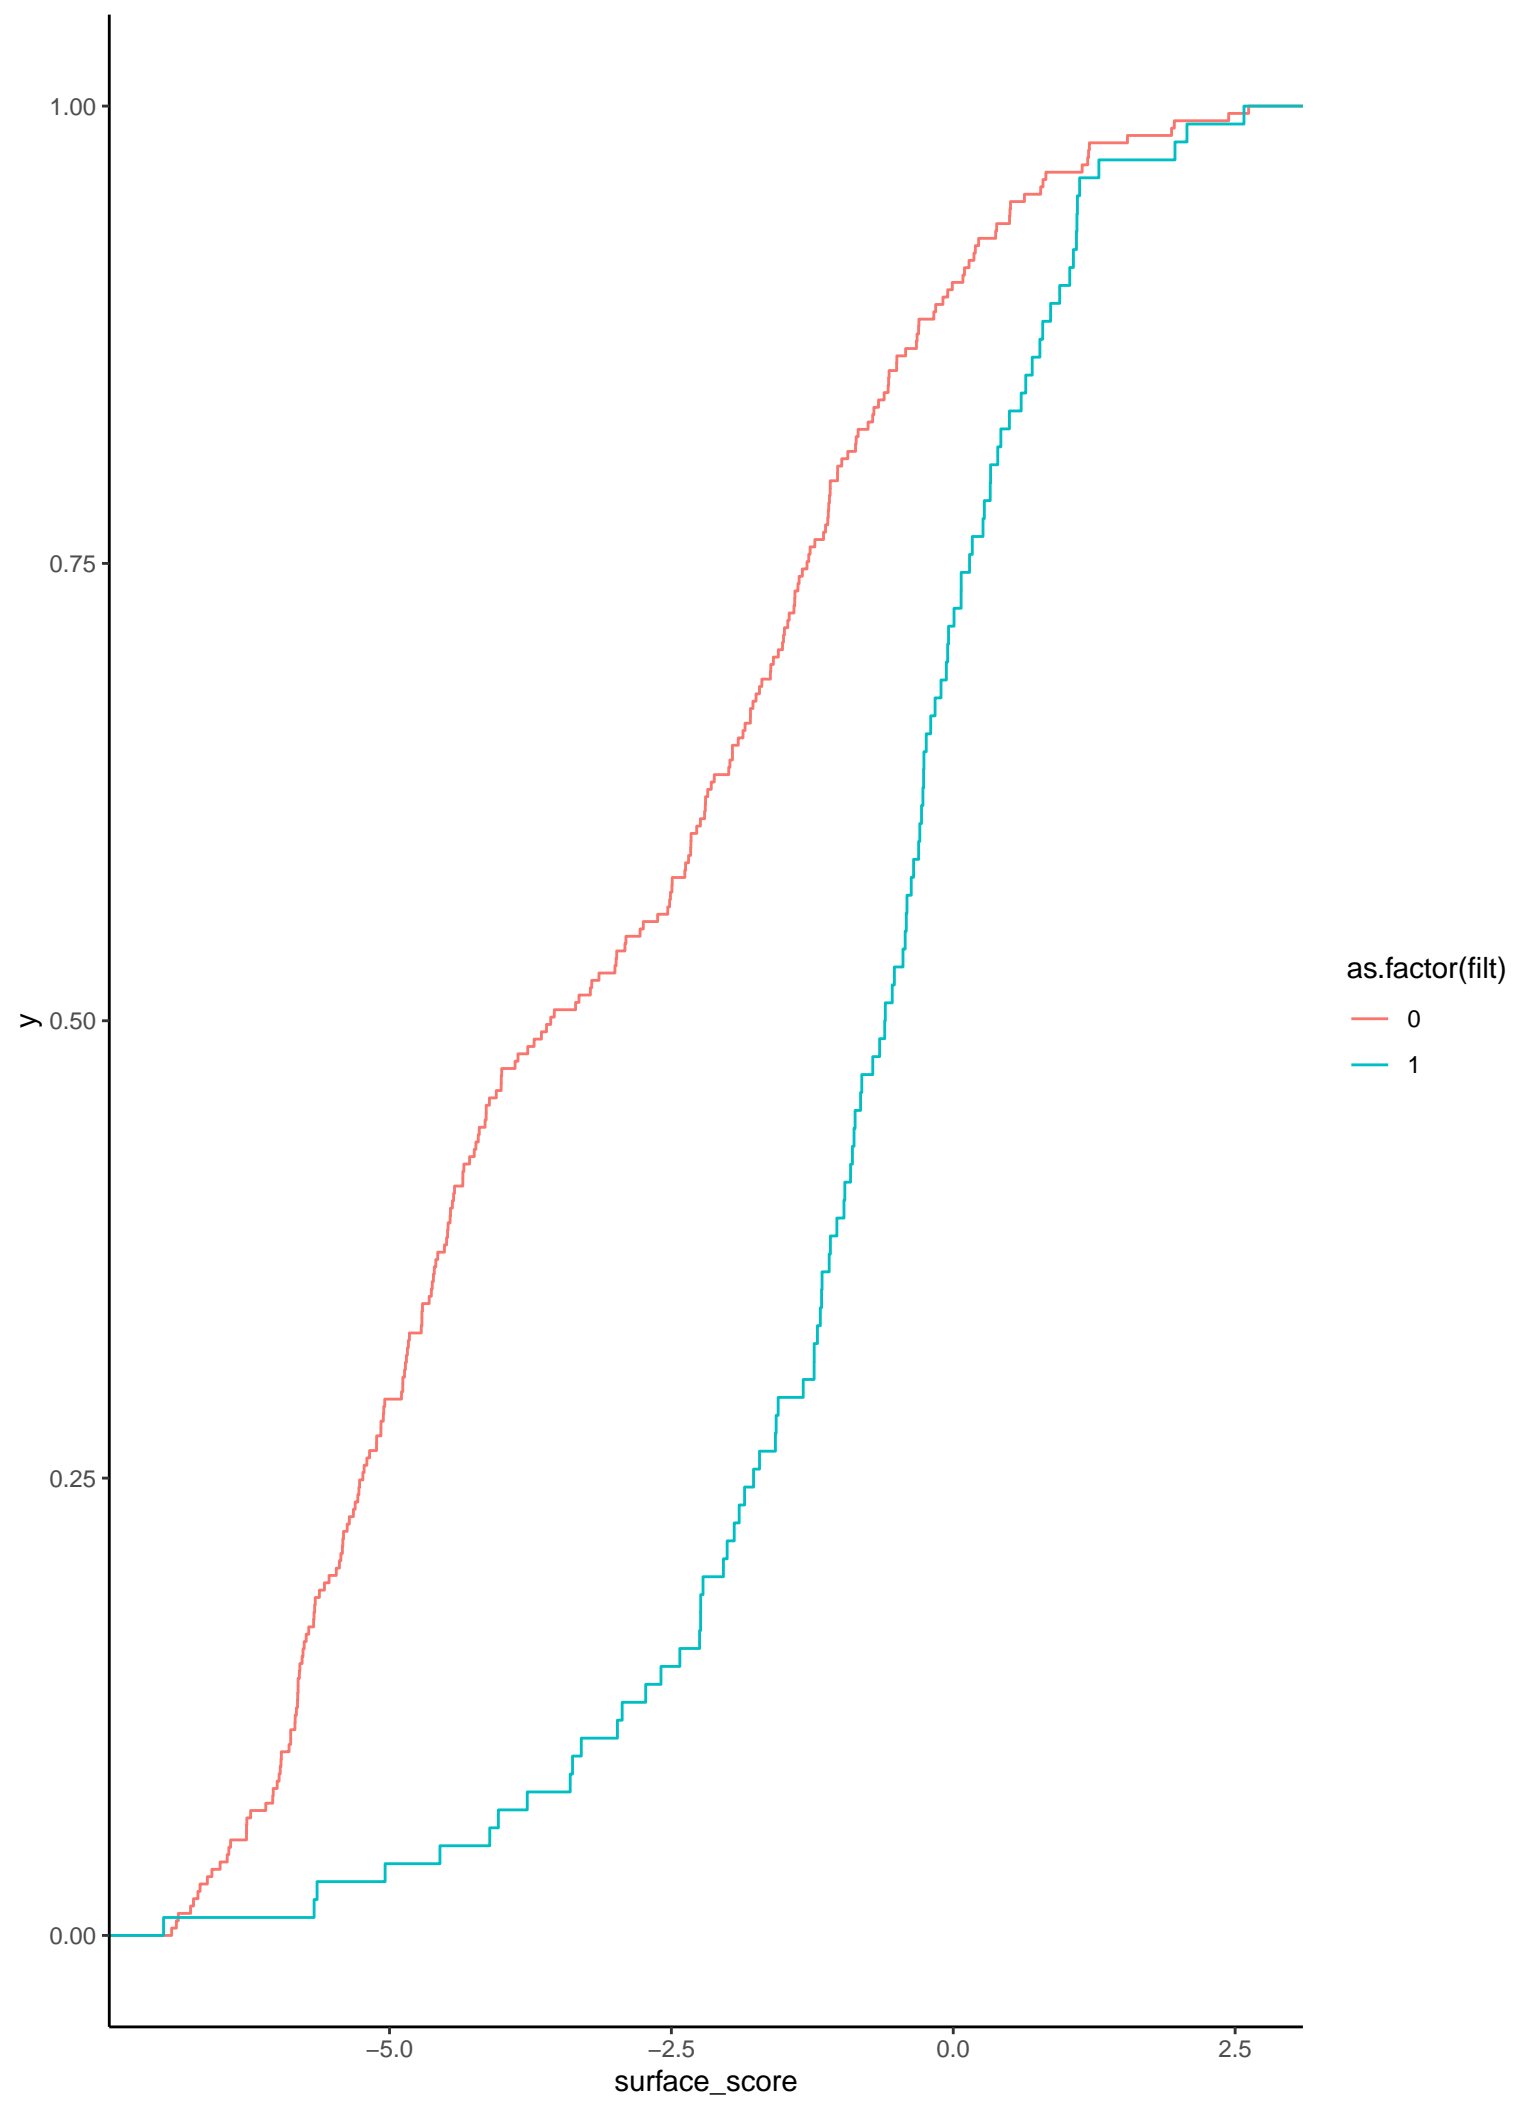

Supplement: data1 [file elife-76903-data1-v2.zip]

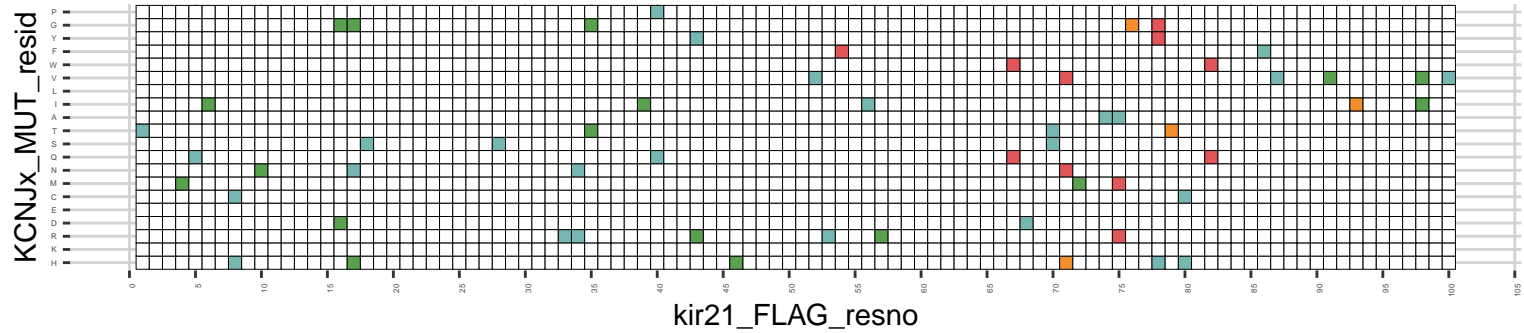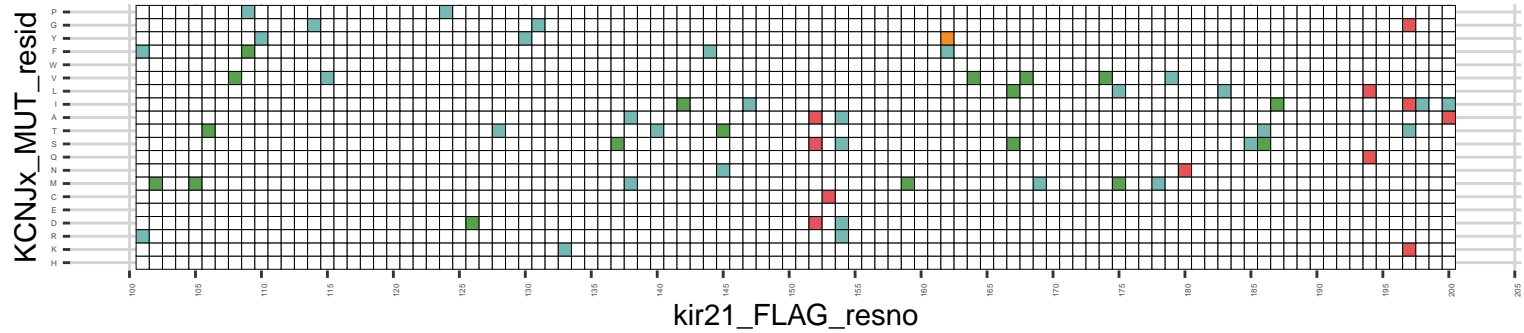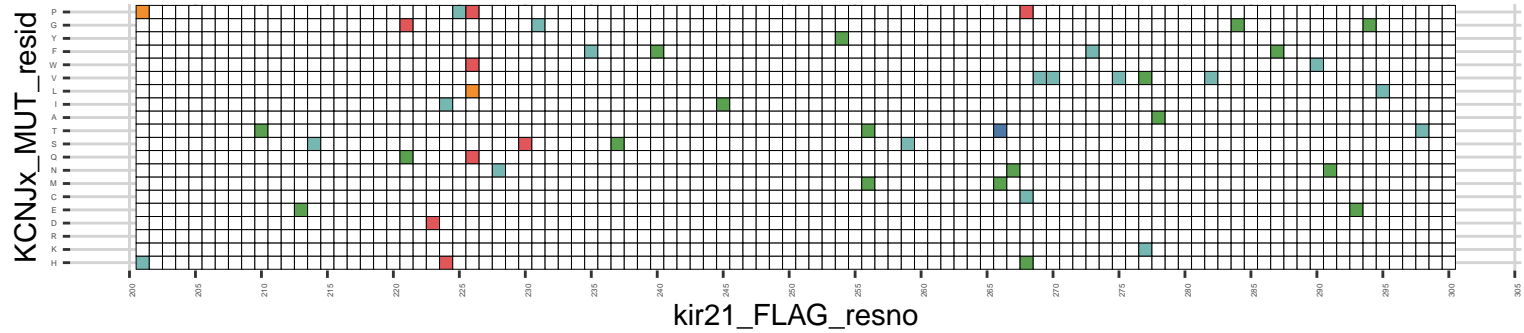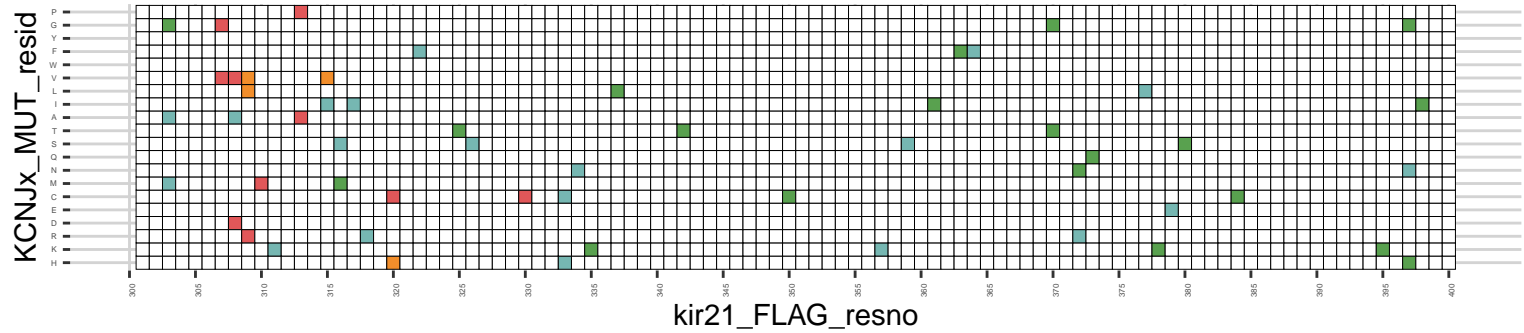

Supplement: data1 [file elife-76903-data1-v2.zip]

Figure 2—figure supplement 1a

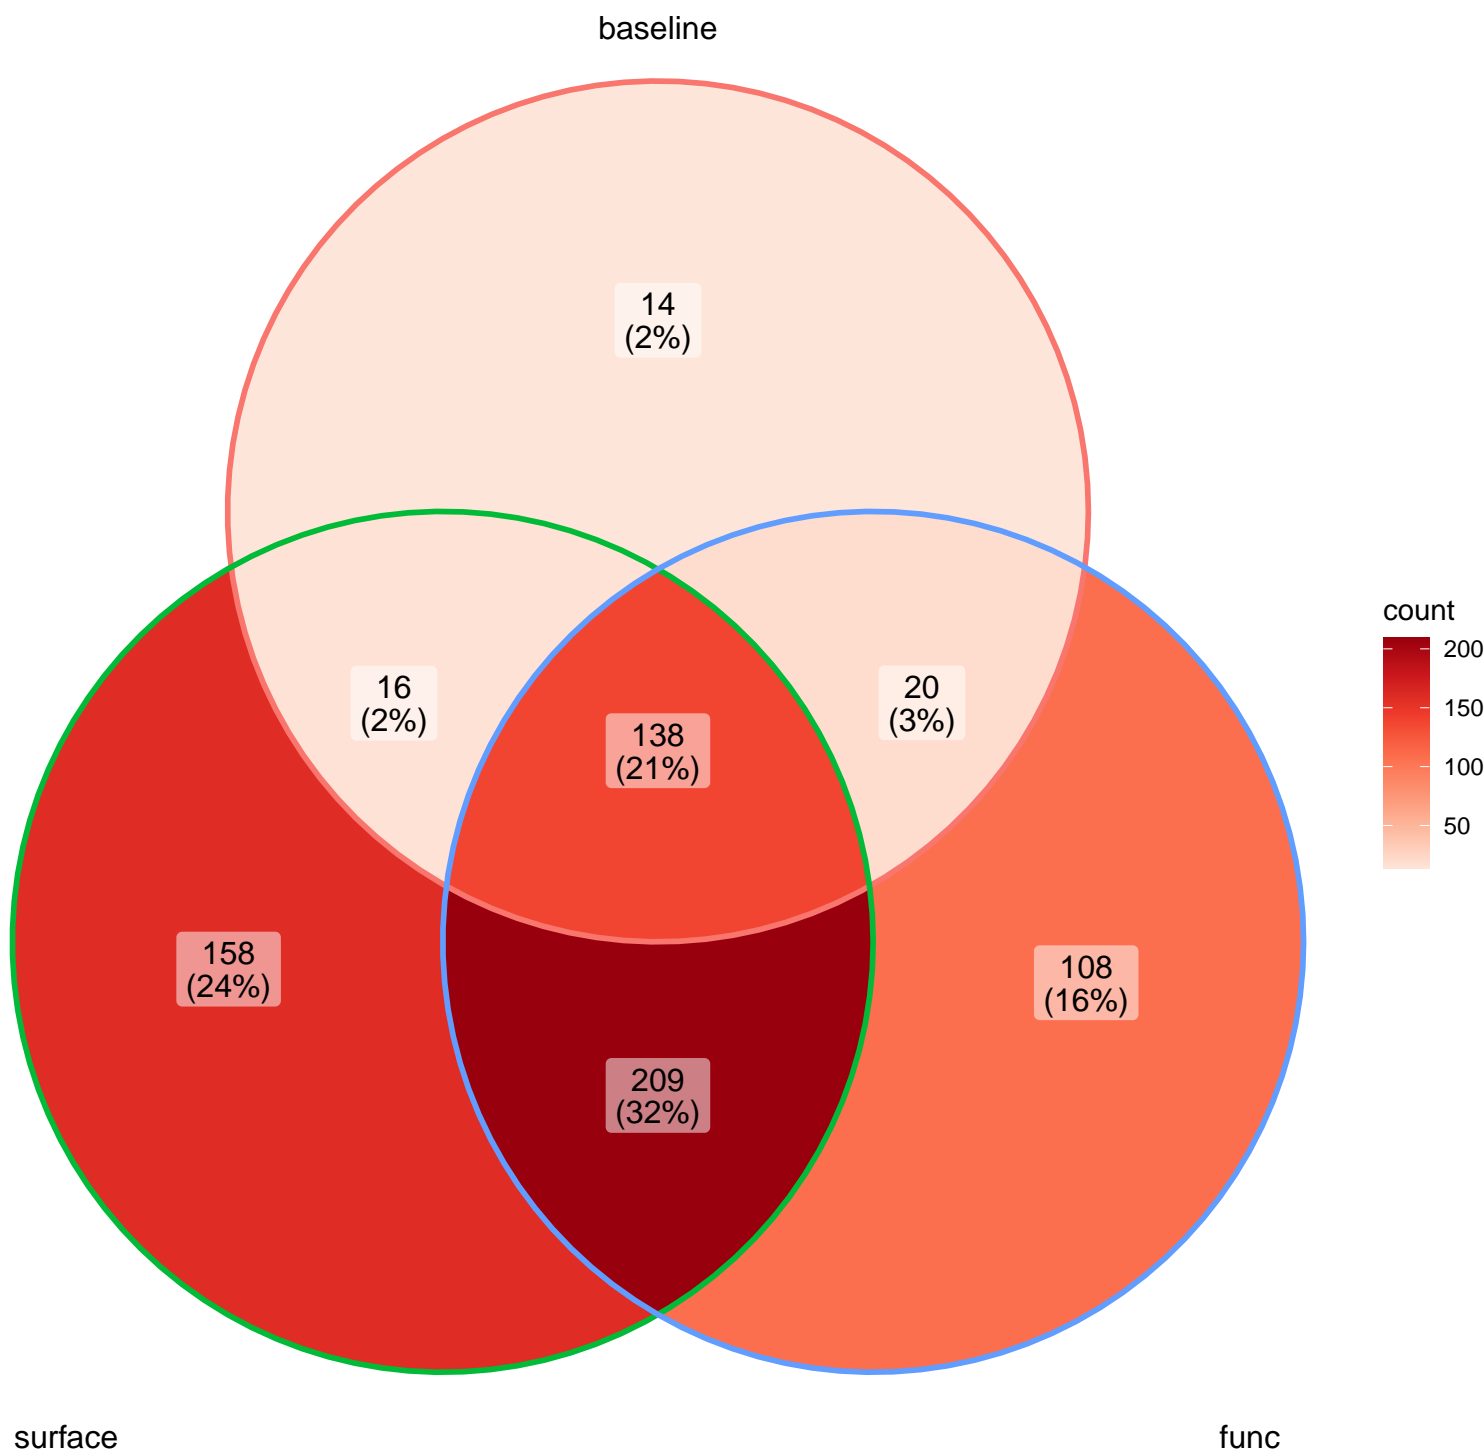

Supplement: data1 [file elife-76903-data1-v2.zip]

Figure 1—figure supplement 2a

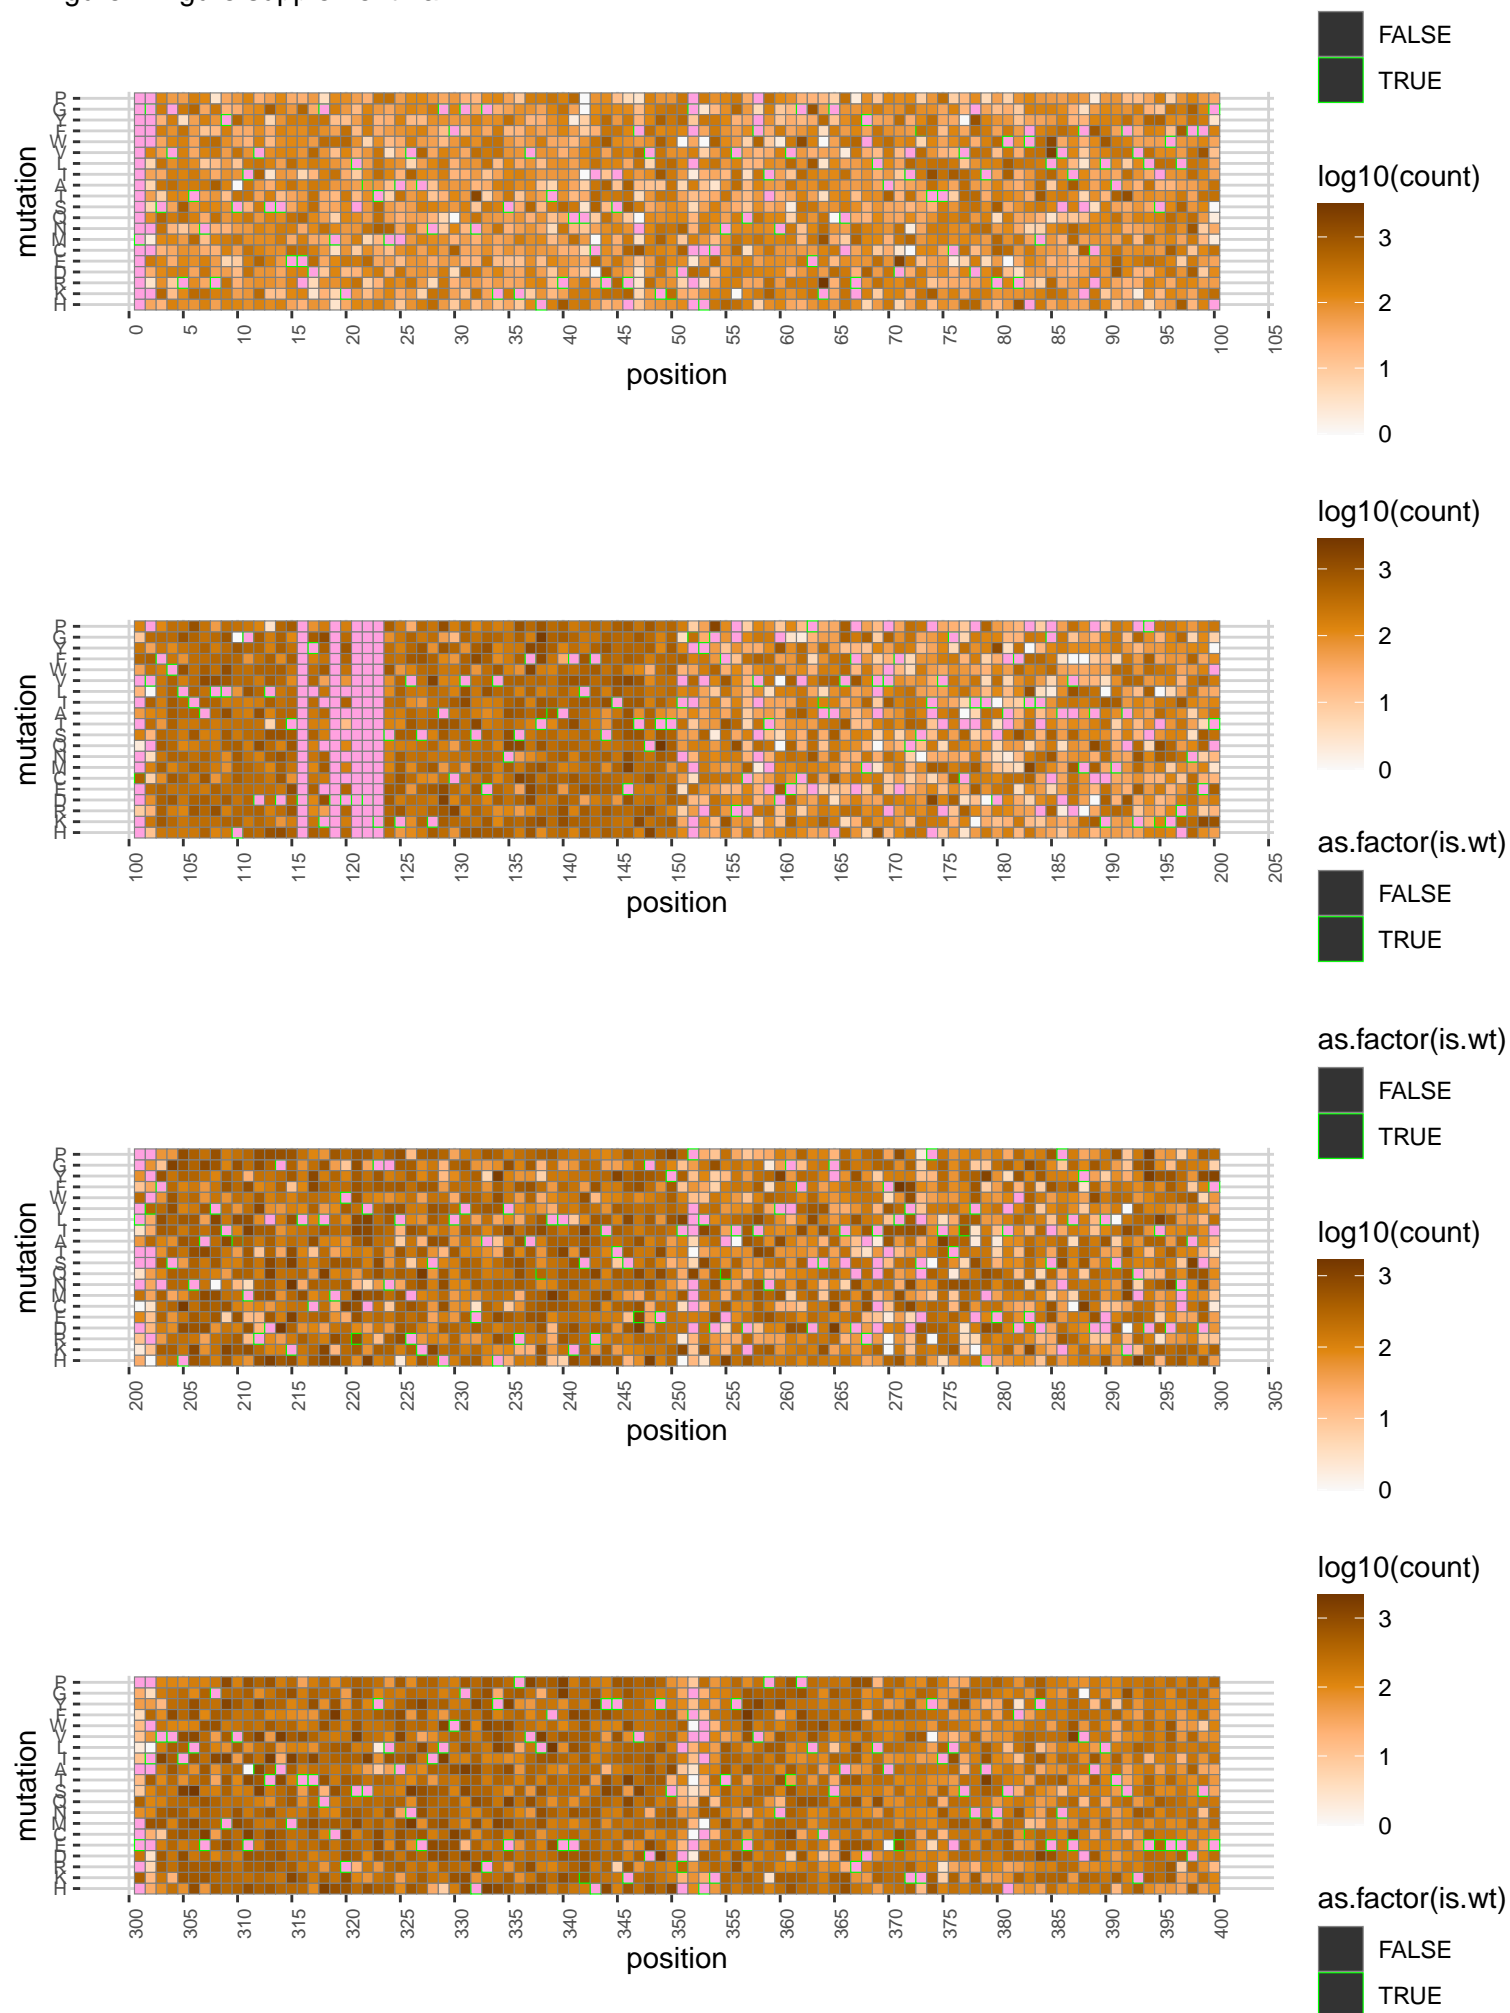

Supplement: data1 [file elife-76903-data1-v2.zip]

Figure 1—figure supplement 2b

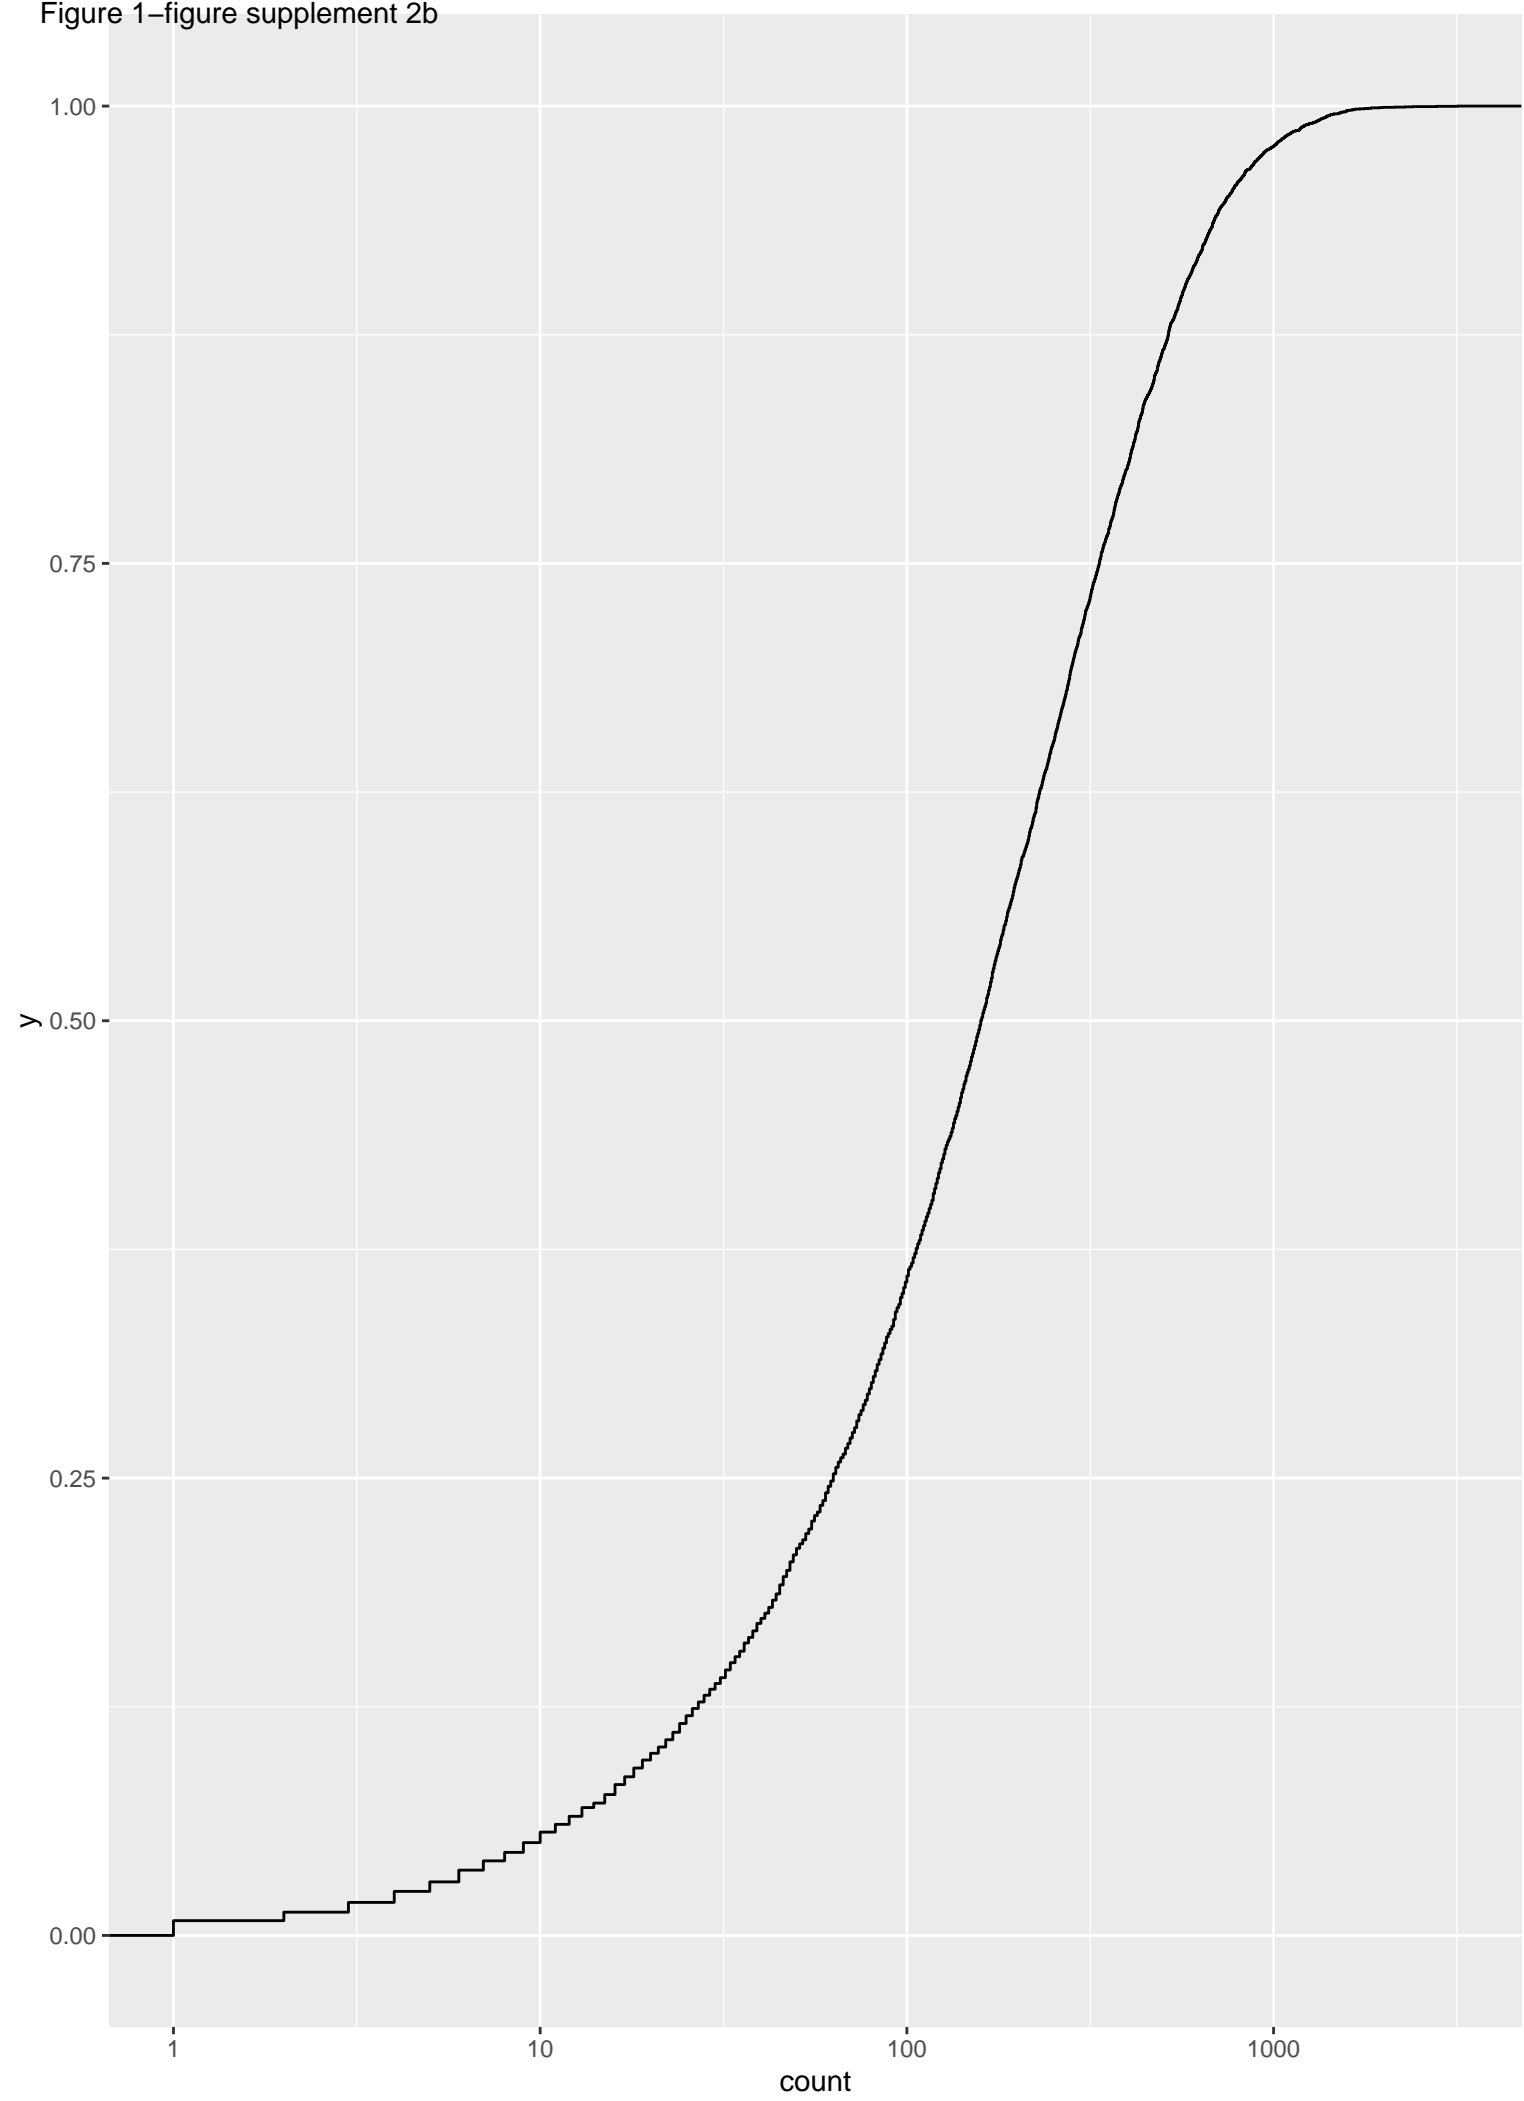

Supplement: data1 [file elife-76903-data1-v2.zip]

Figure 2—figure supplement 5a

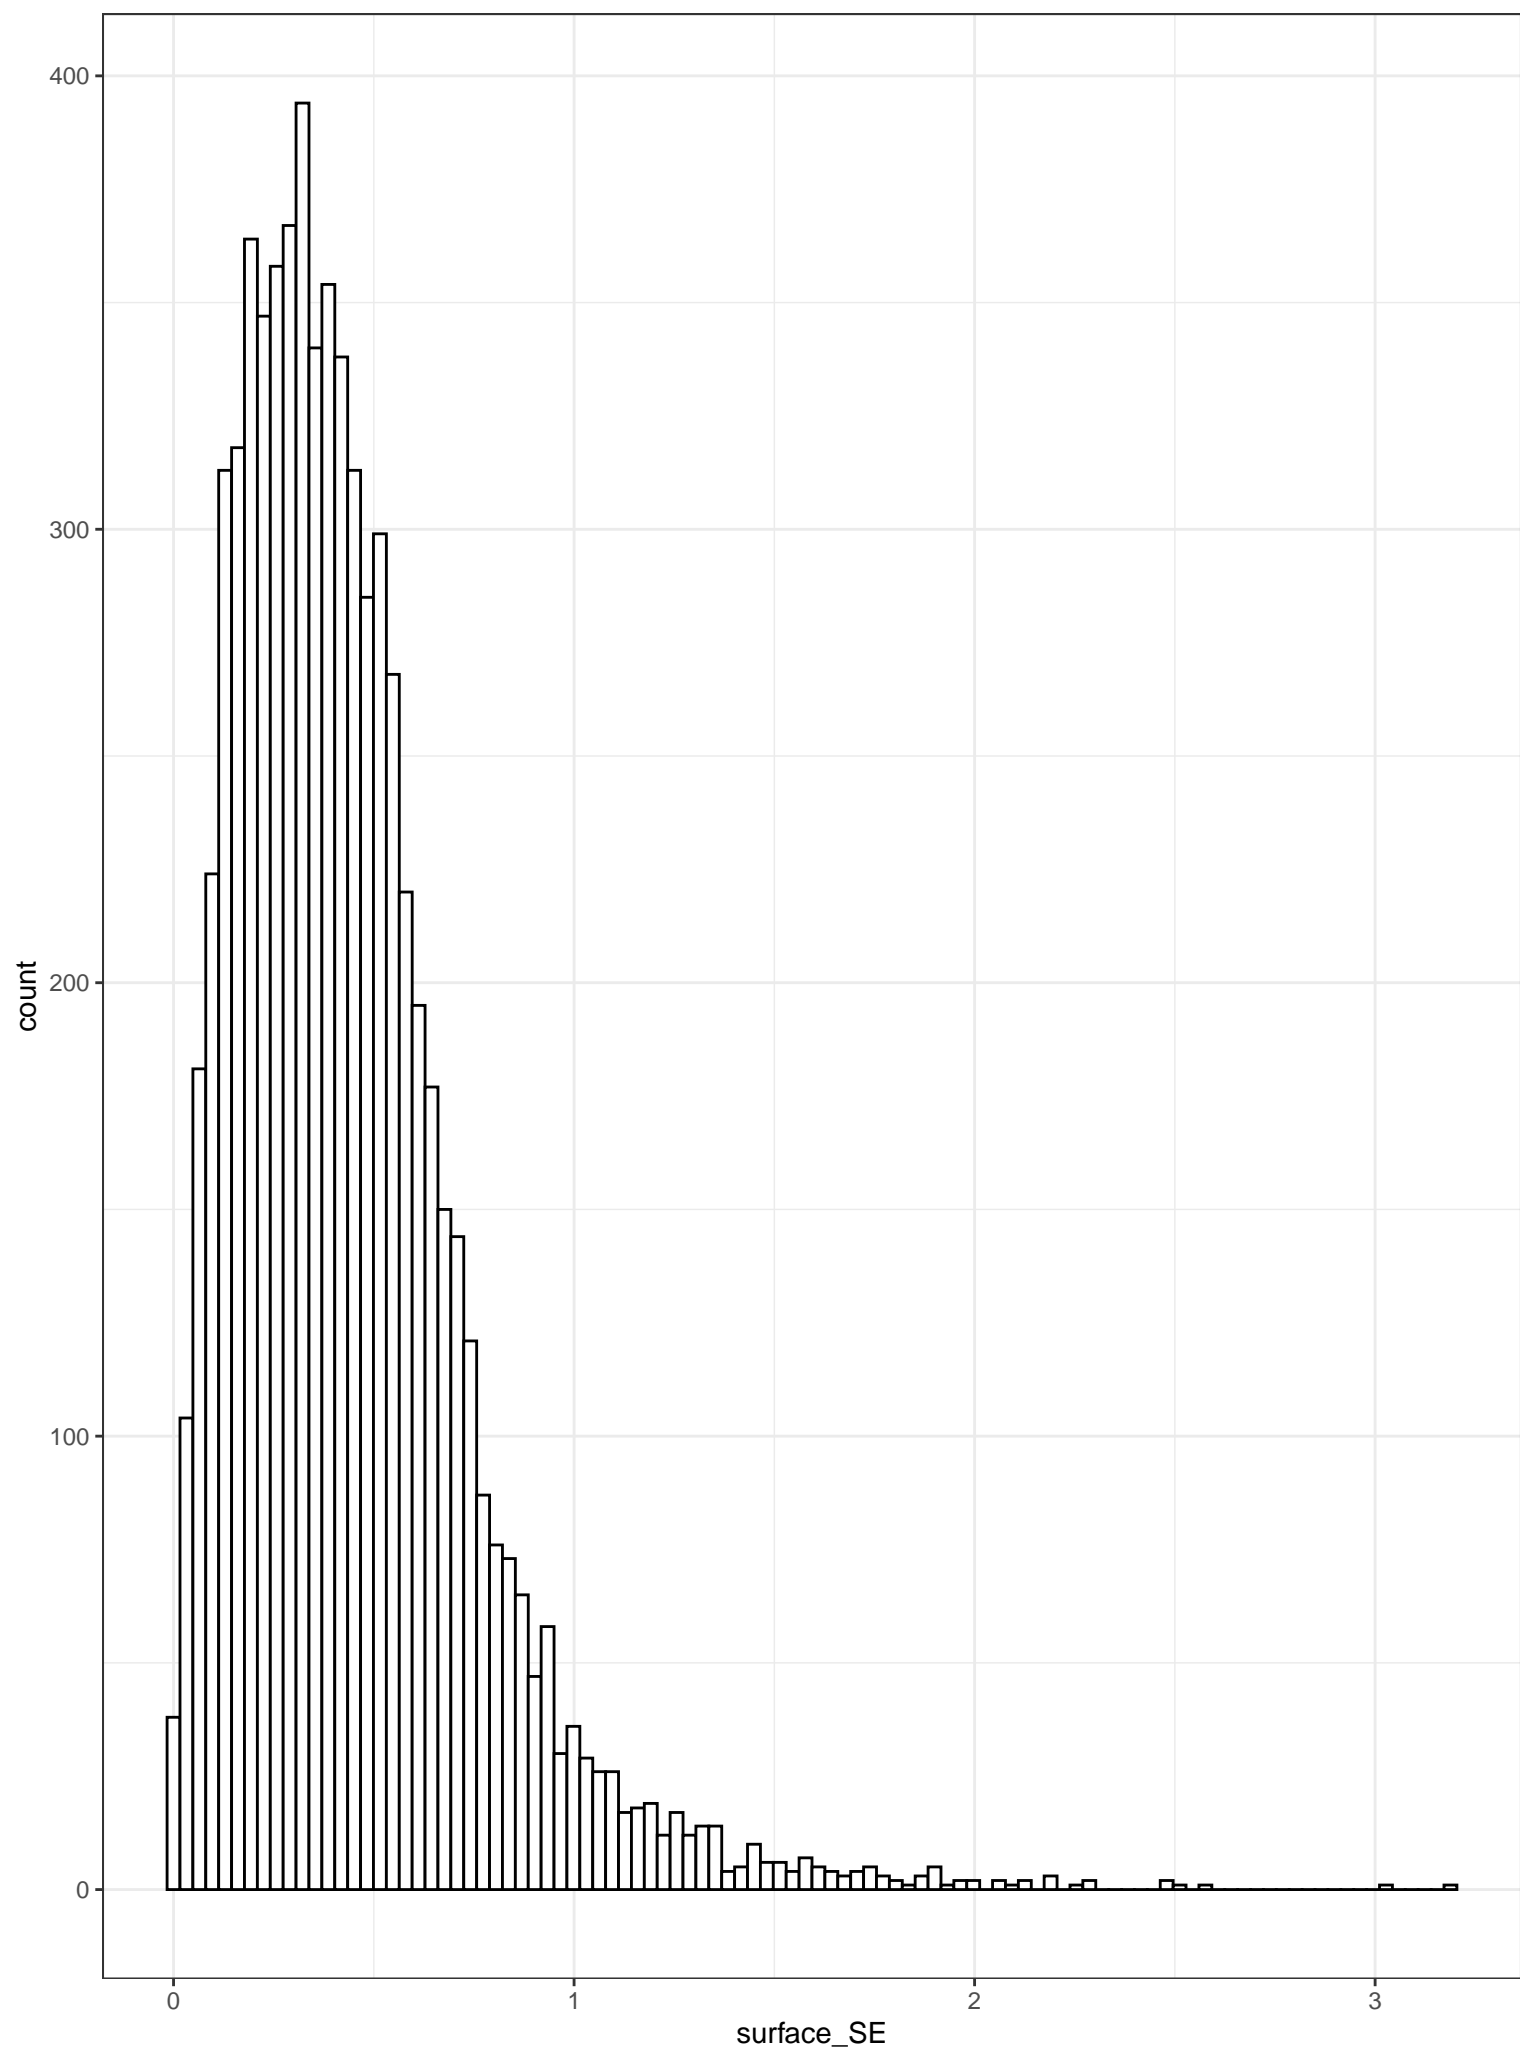

Supplement: data1 [file elife-76903-data1-v2.zip]

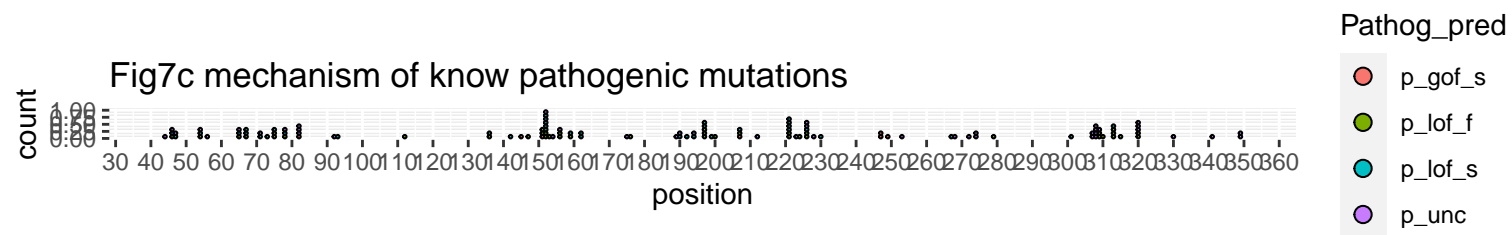

Supplement: data1 [file elife-76903-data1-v2.zip]

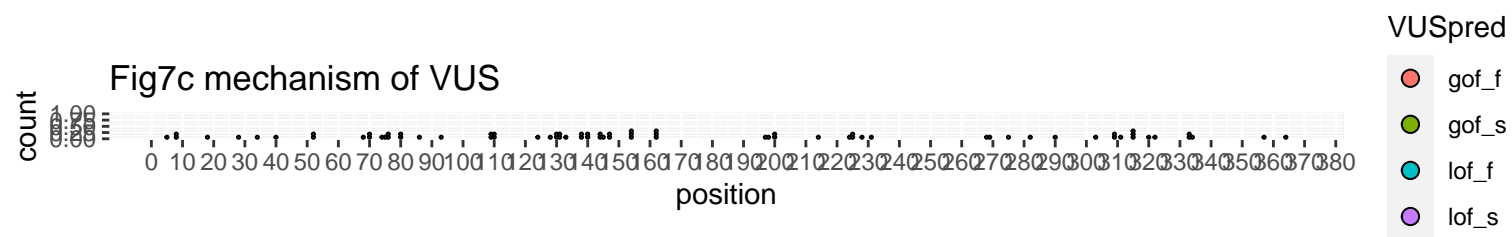

Supplement: data1 [file elife-76903-data1-v2.zip]

Fig2g

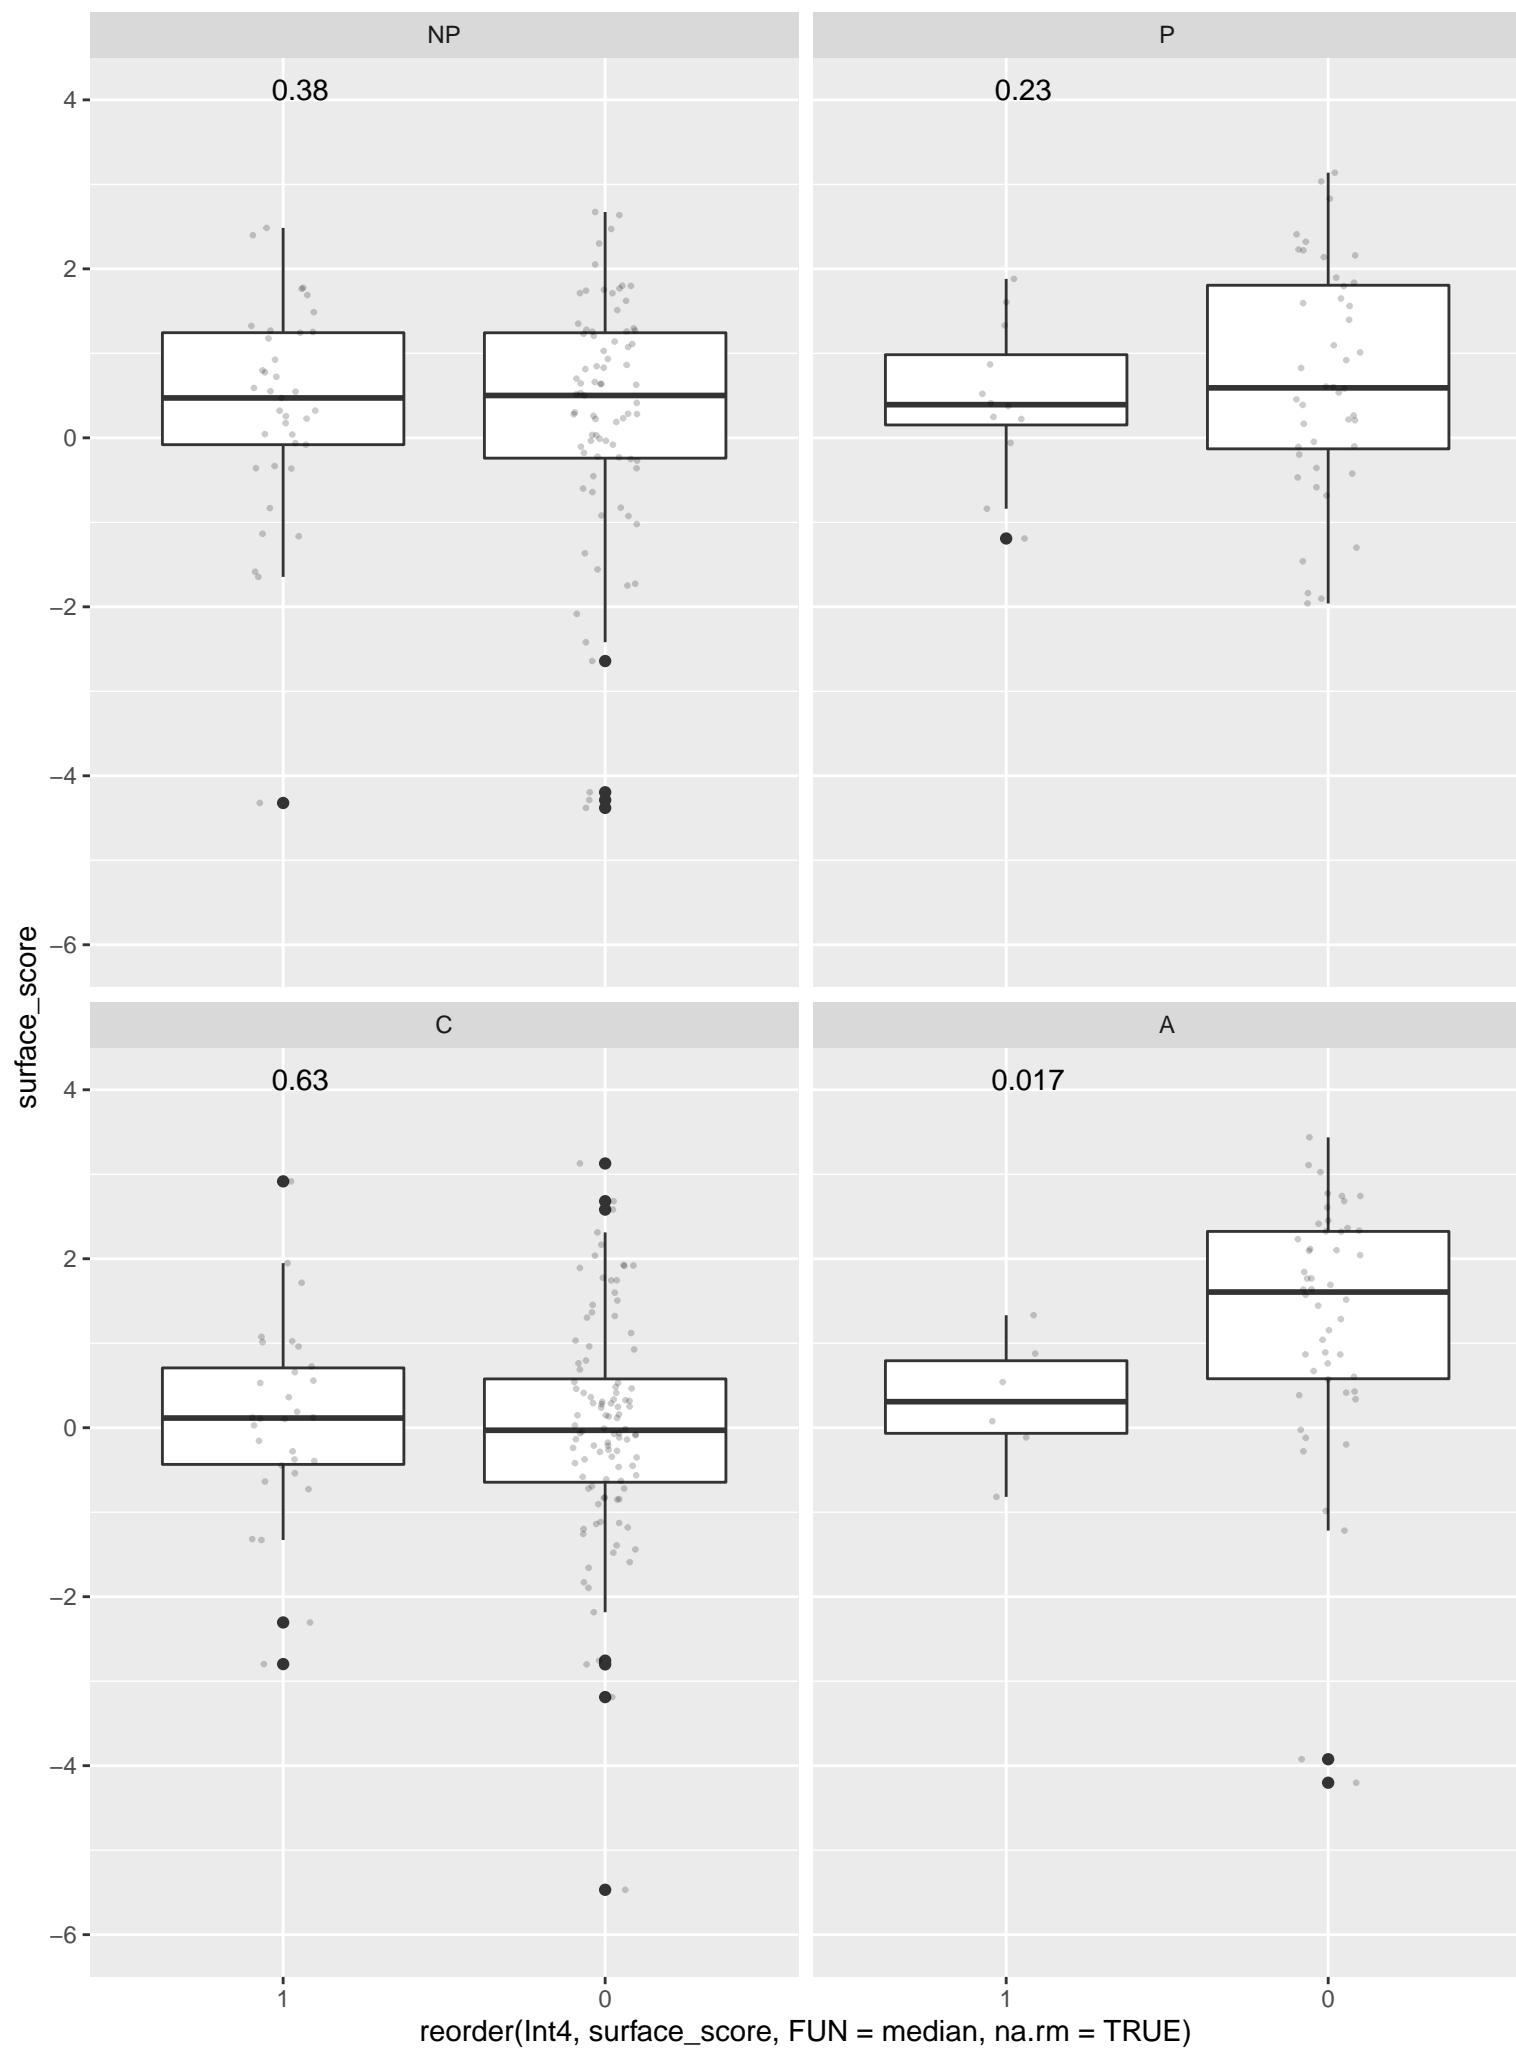

Supplement: data1 [file elife-76903-data1-v2.zip]

Figure 4—figure supplement 4a

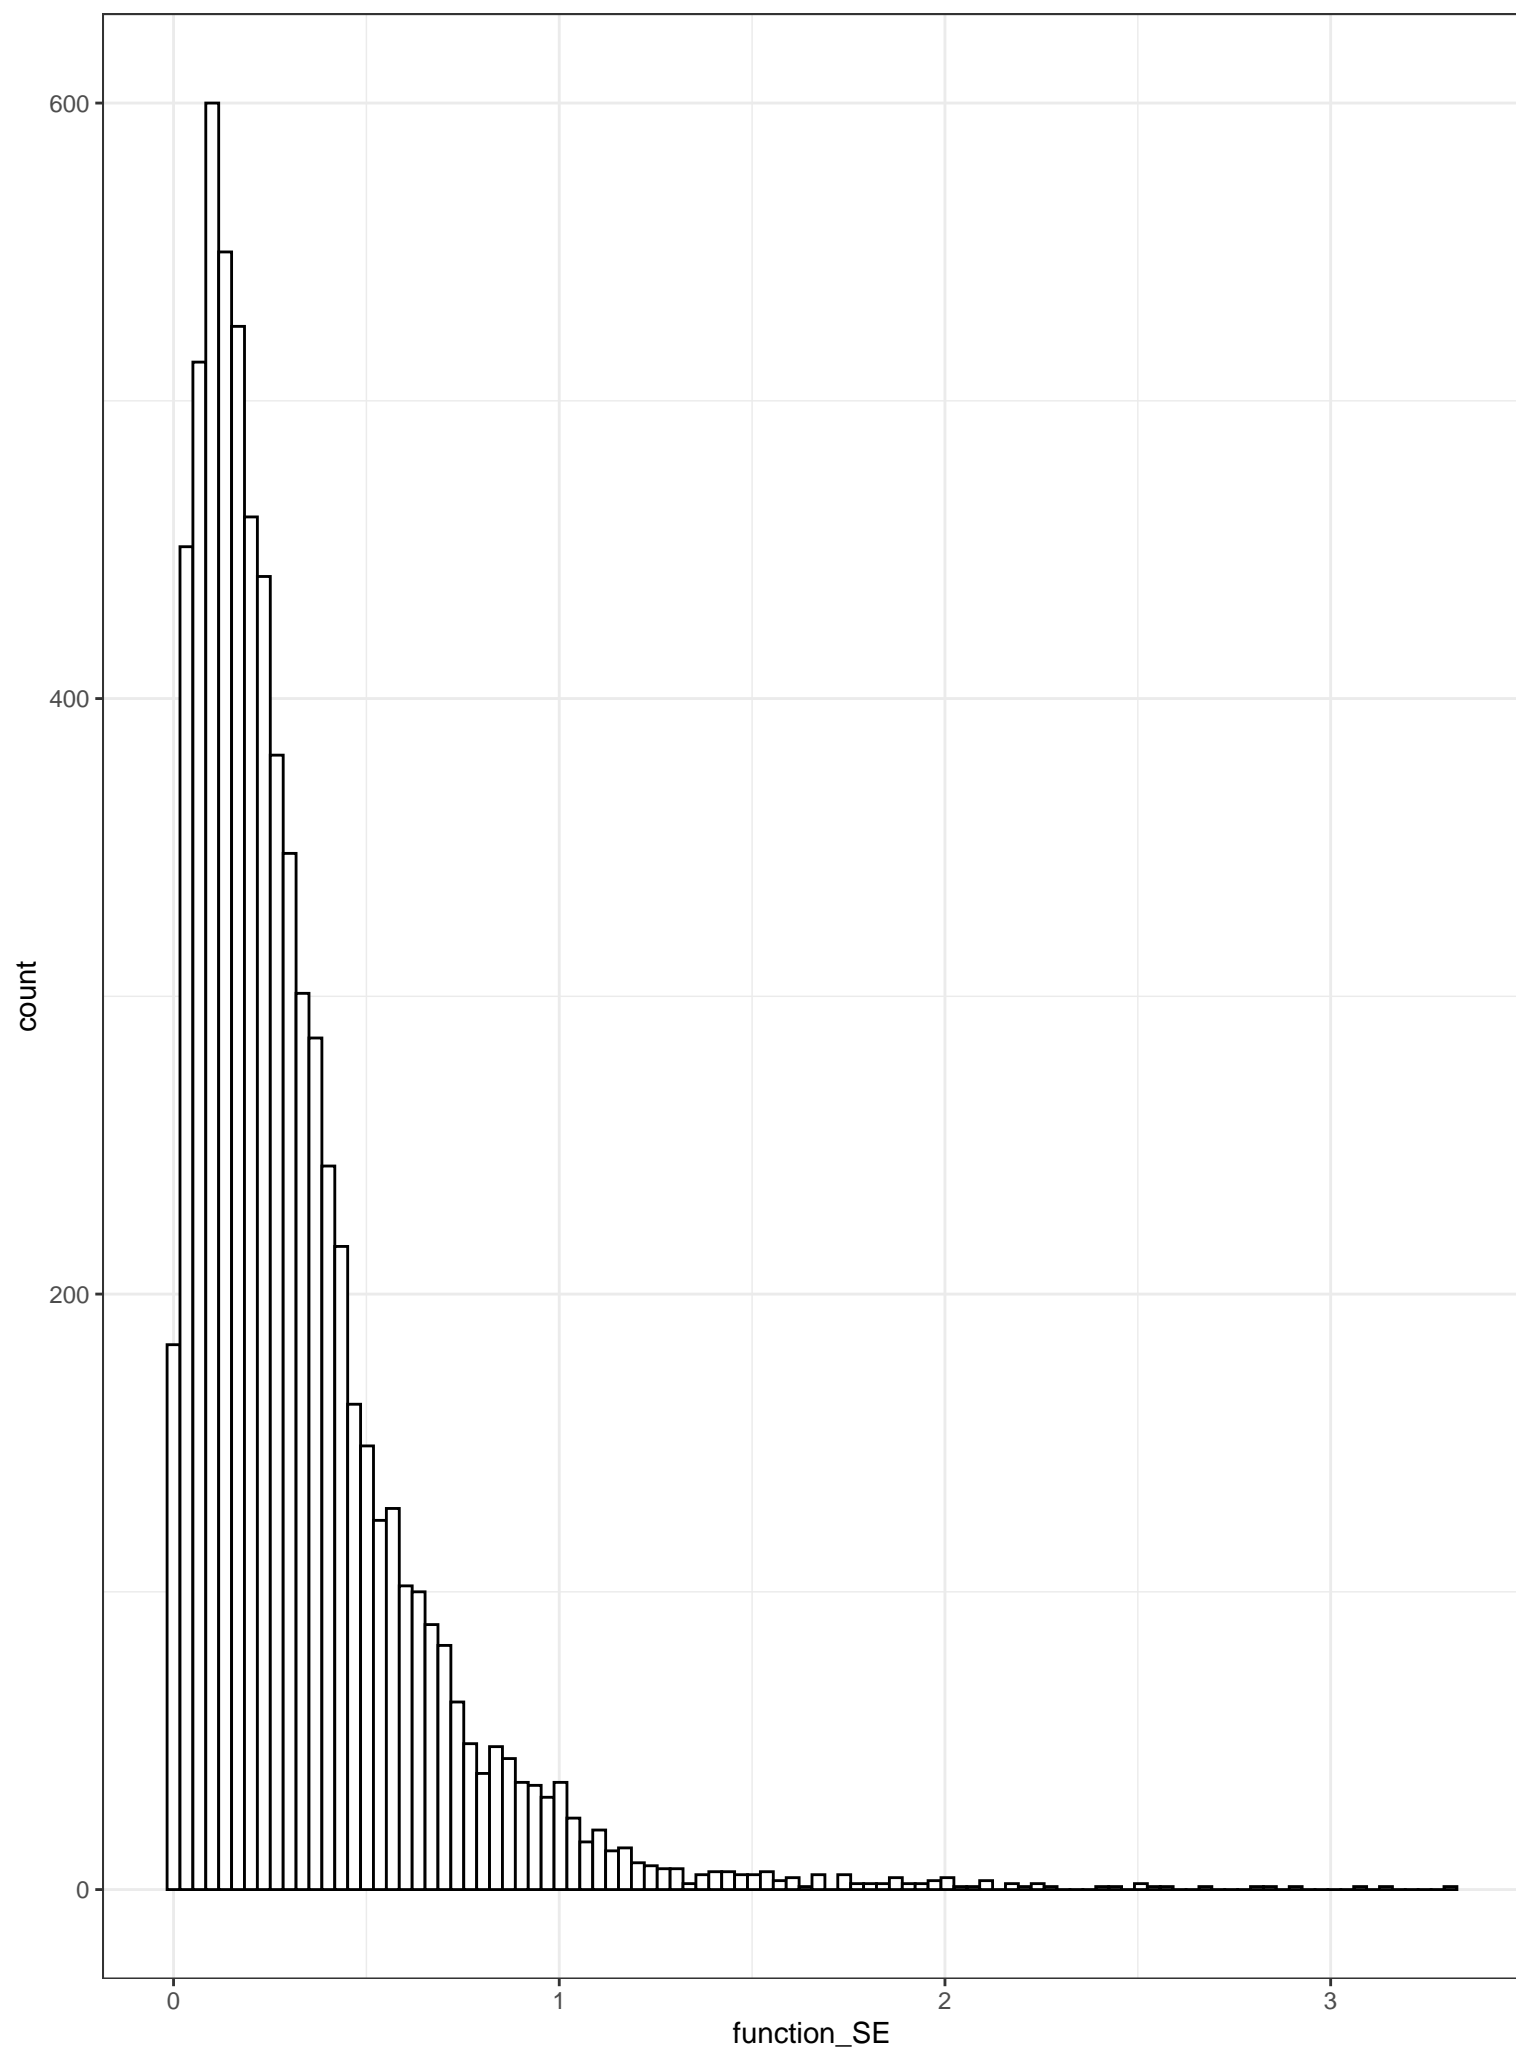

Supplement: data1 [file elife-76903-data1-v2.zip]

Fig2a Figure 2a

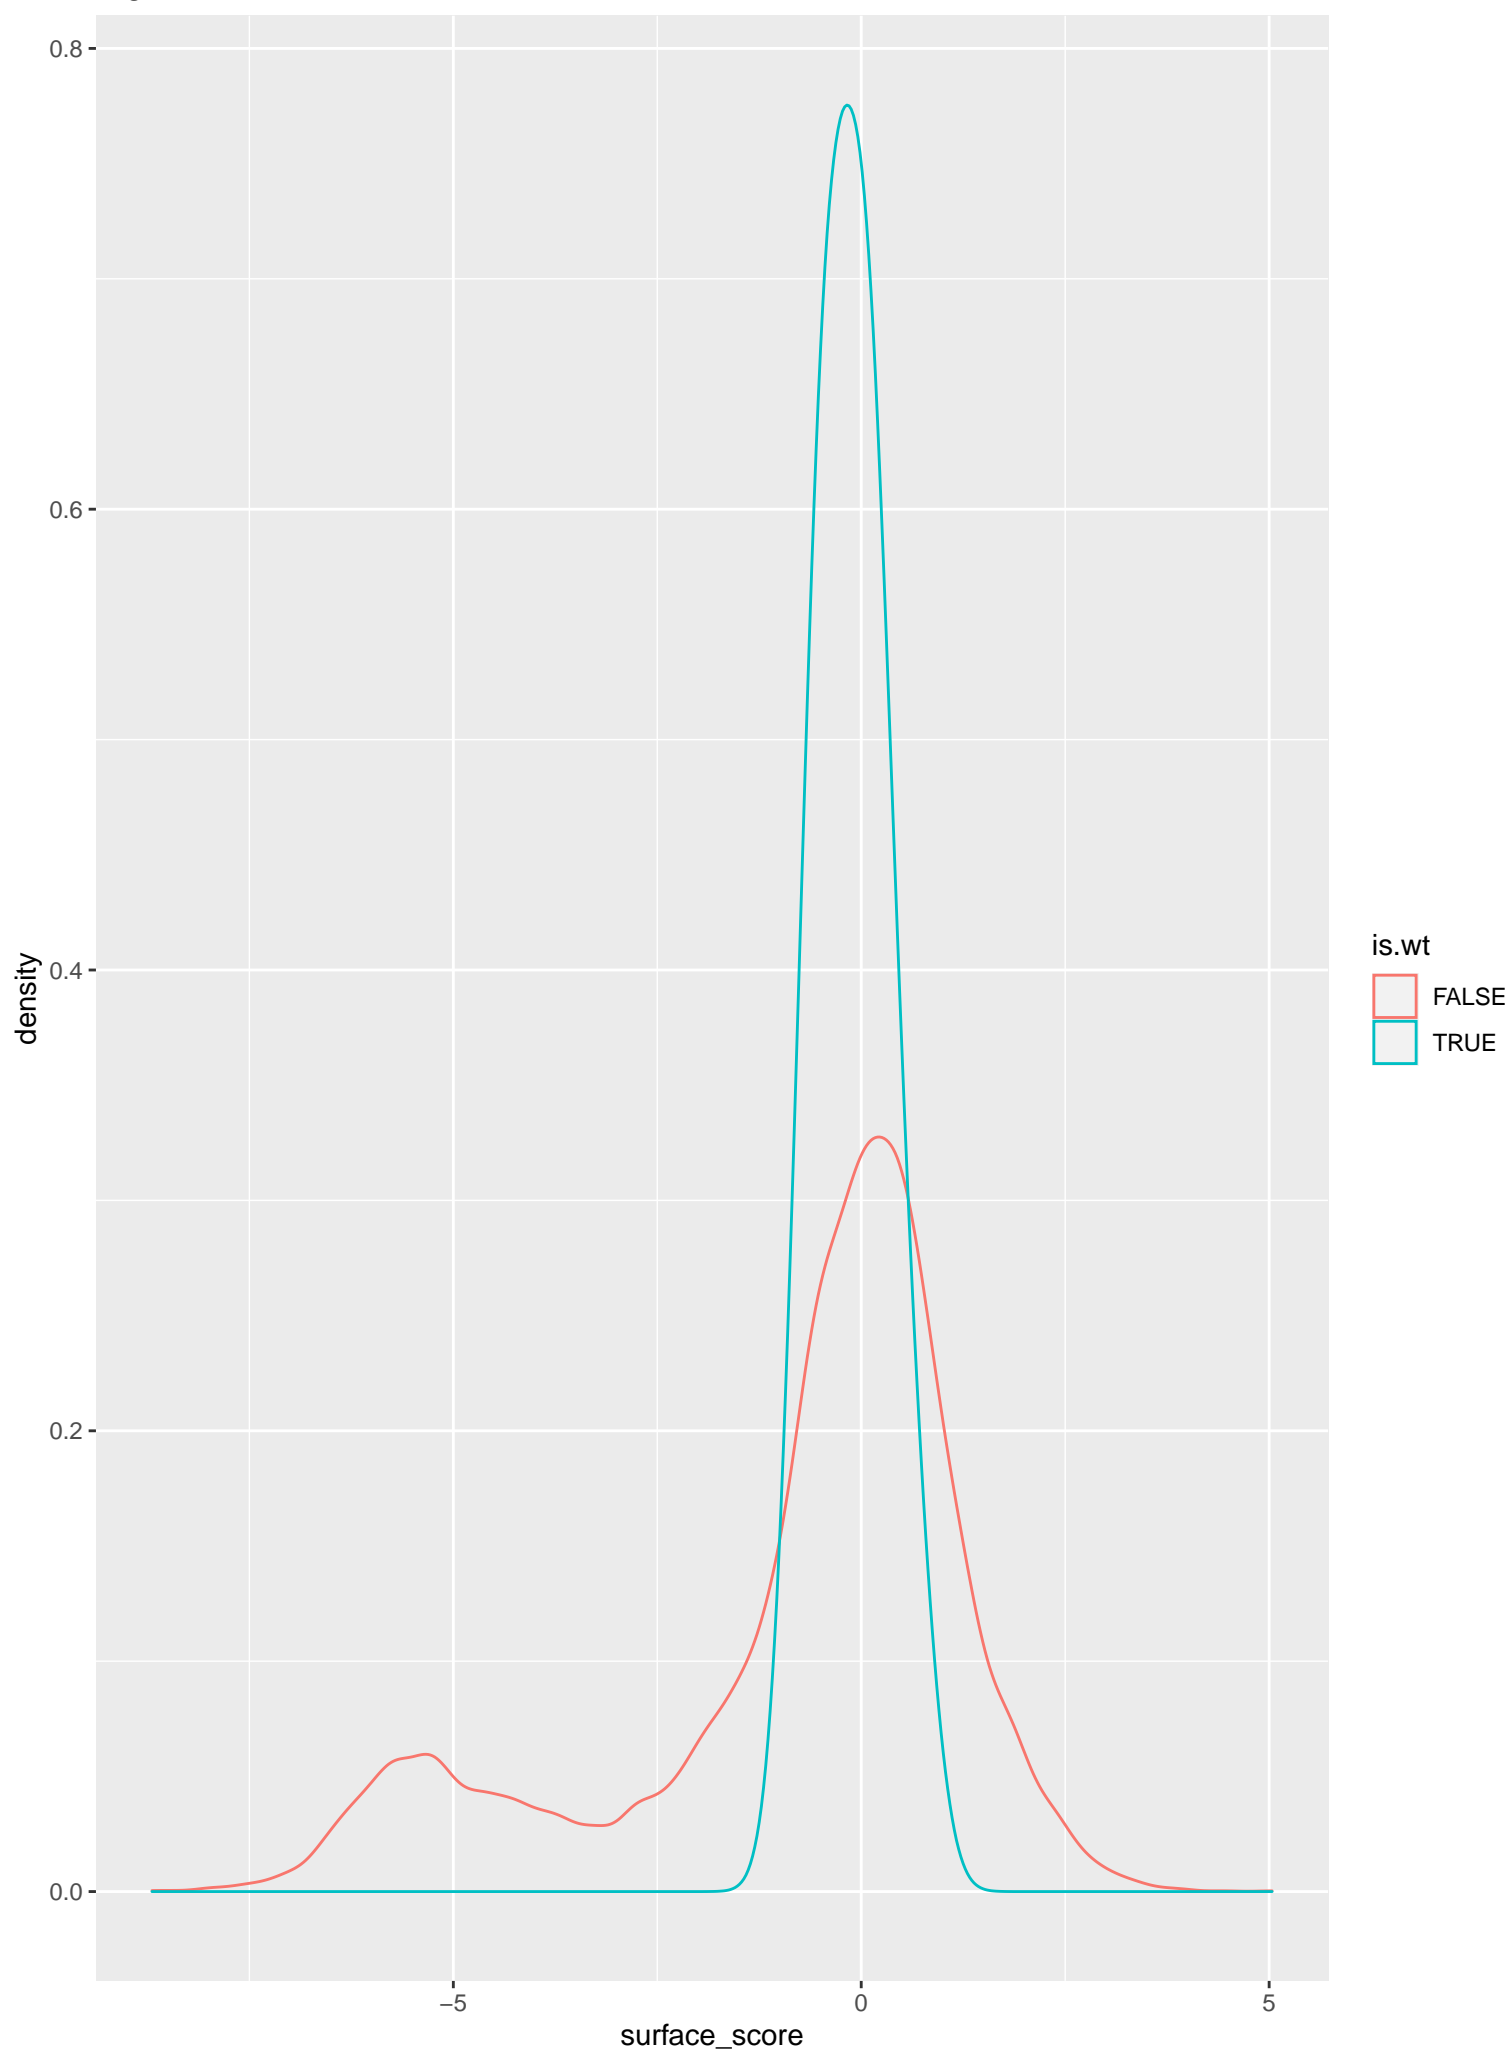

Supplement: data1 [file elife-76903-data1-v2.zip]

Figure 4—figure supplement 1

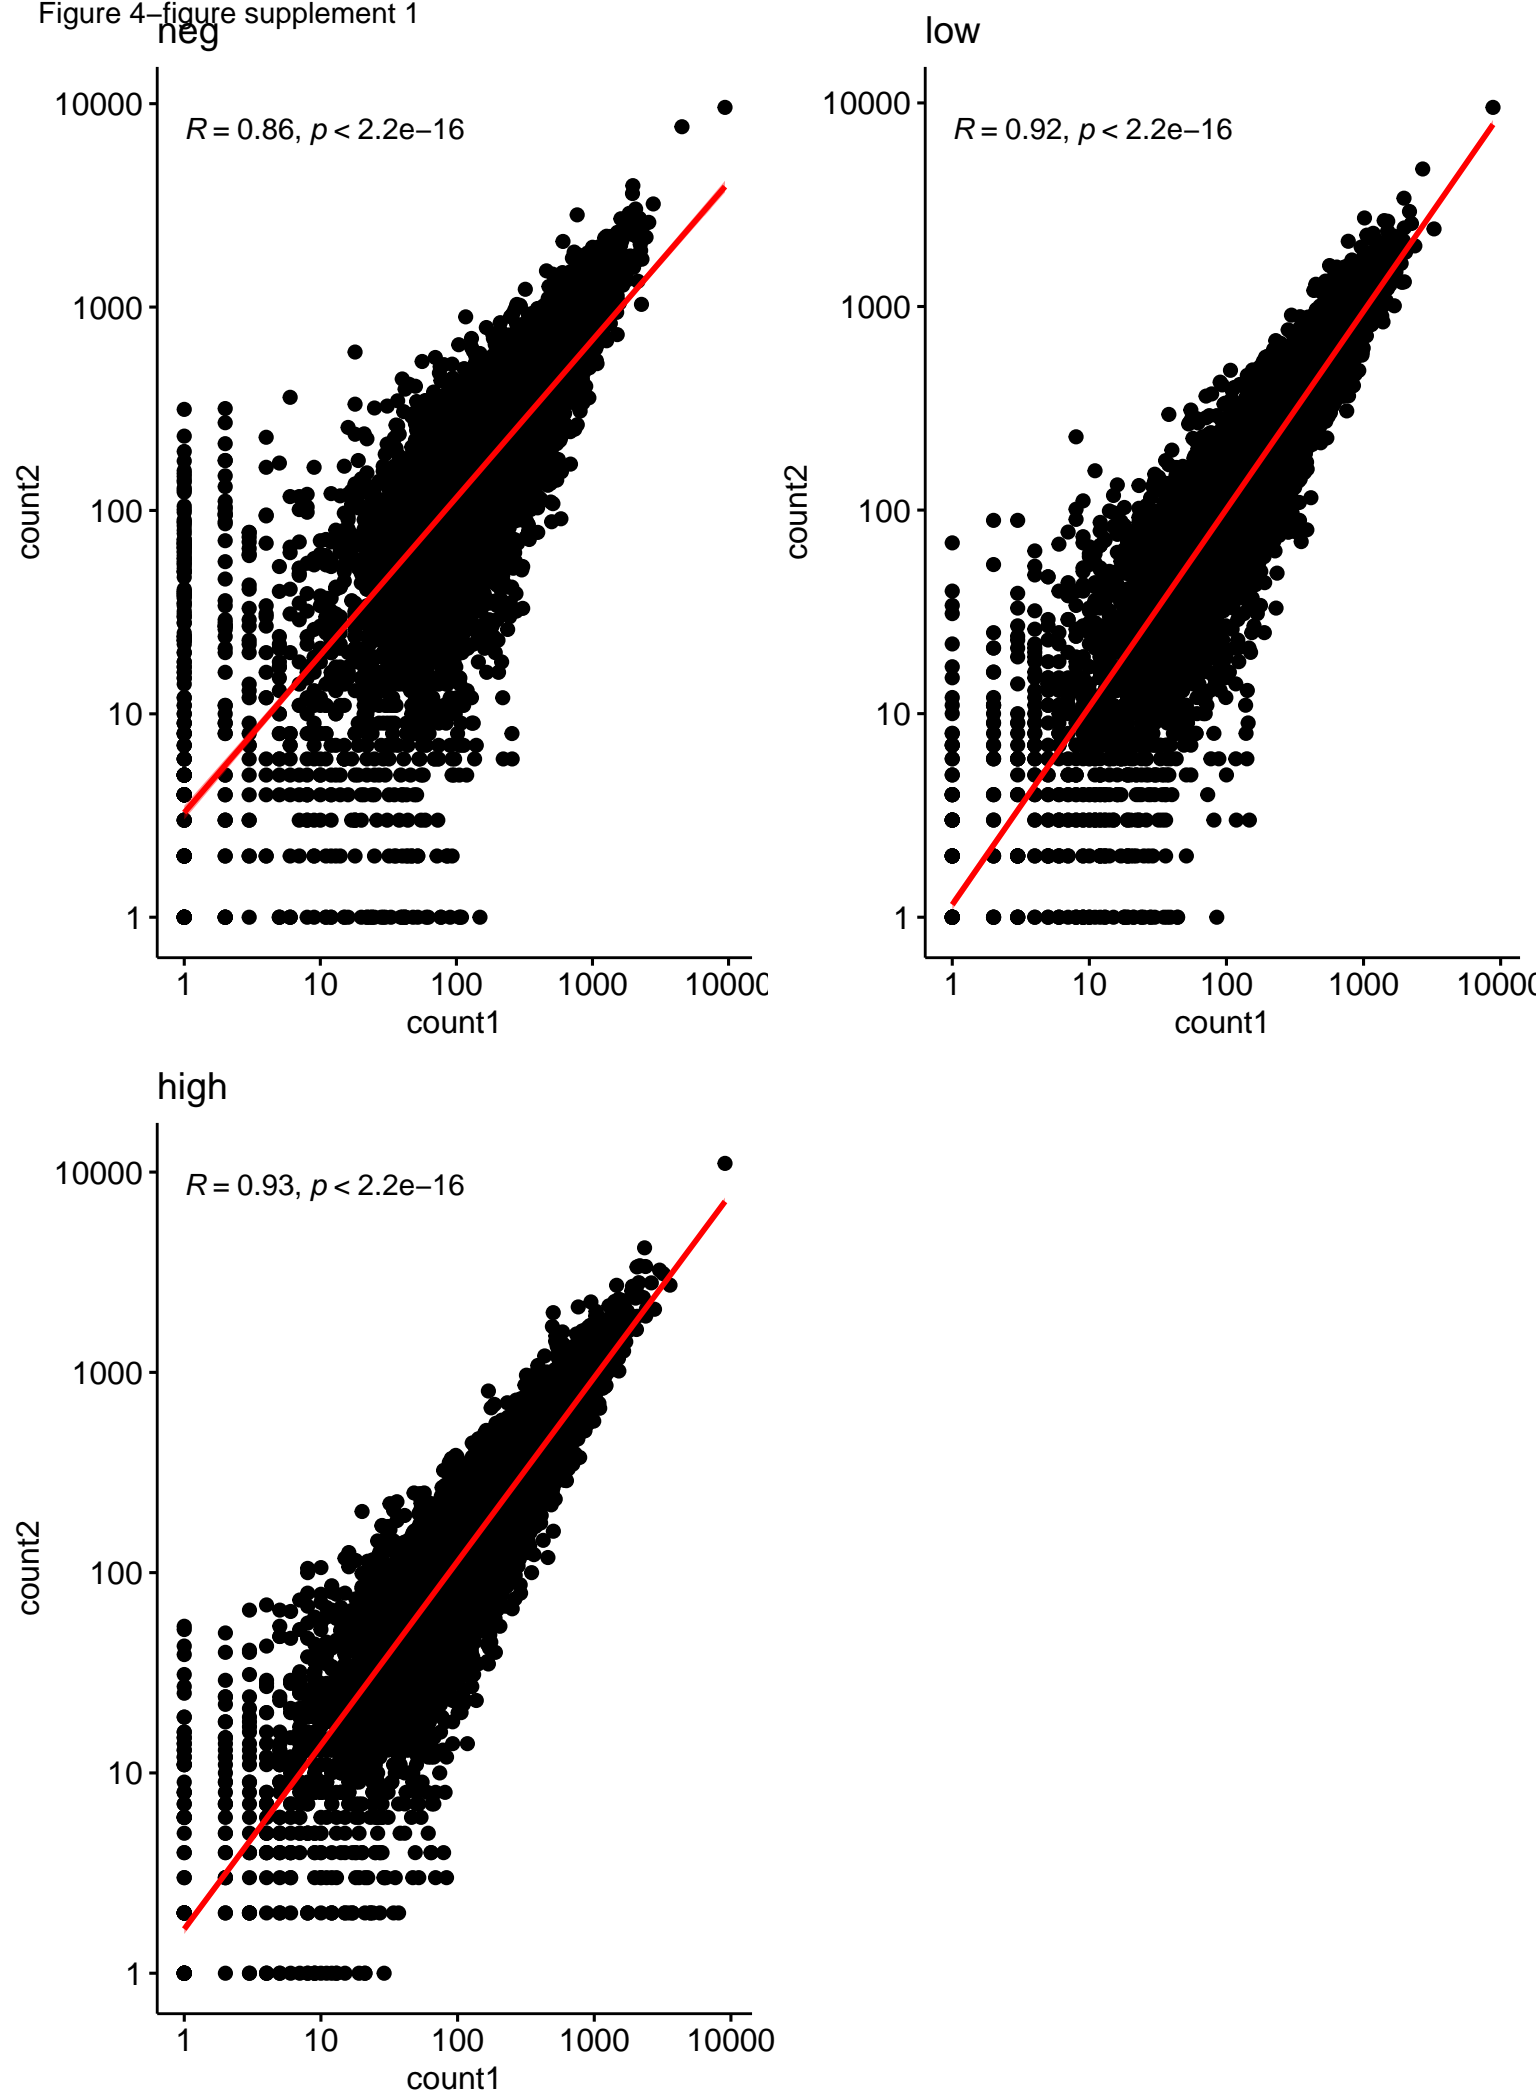

Supplement: data1 [file elife-76903-data1-v2.zip]

Fig2b

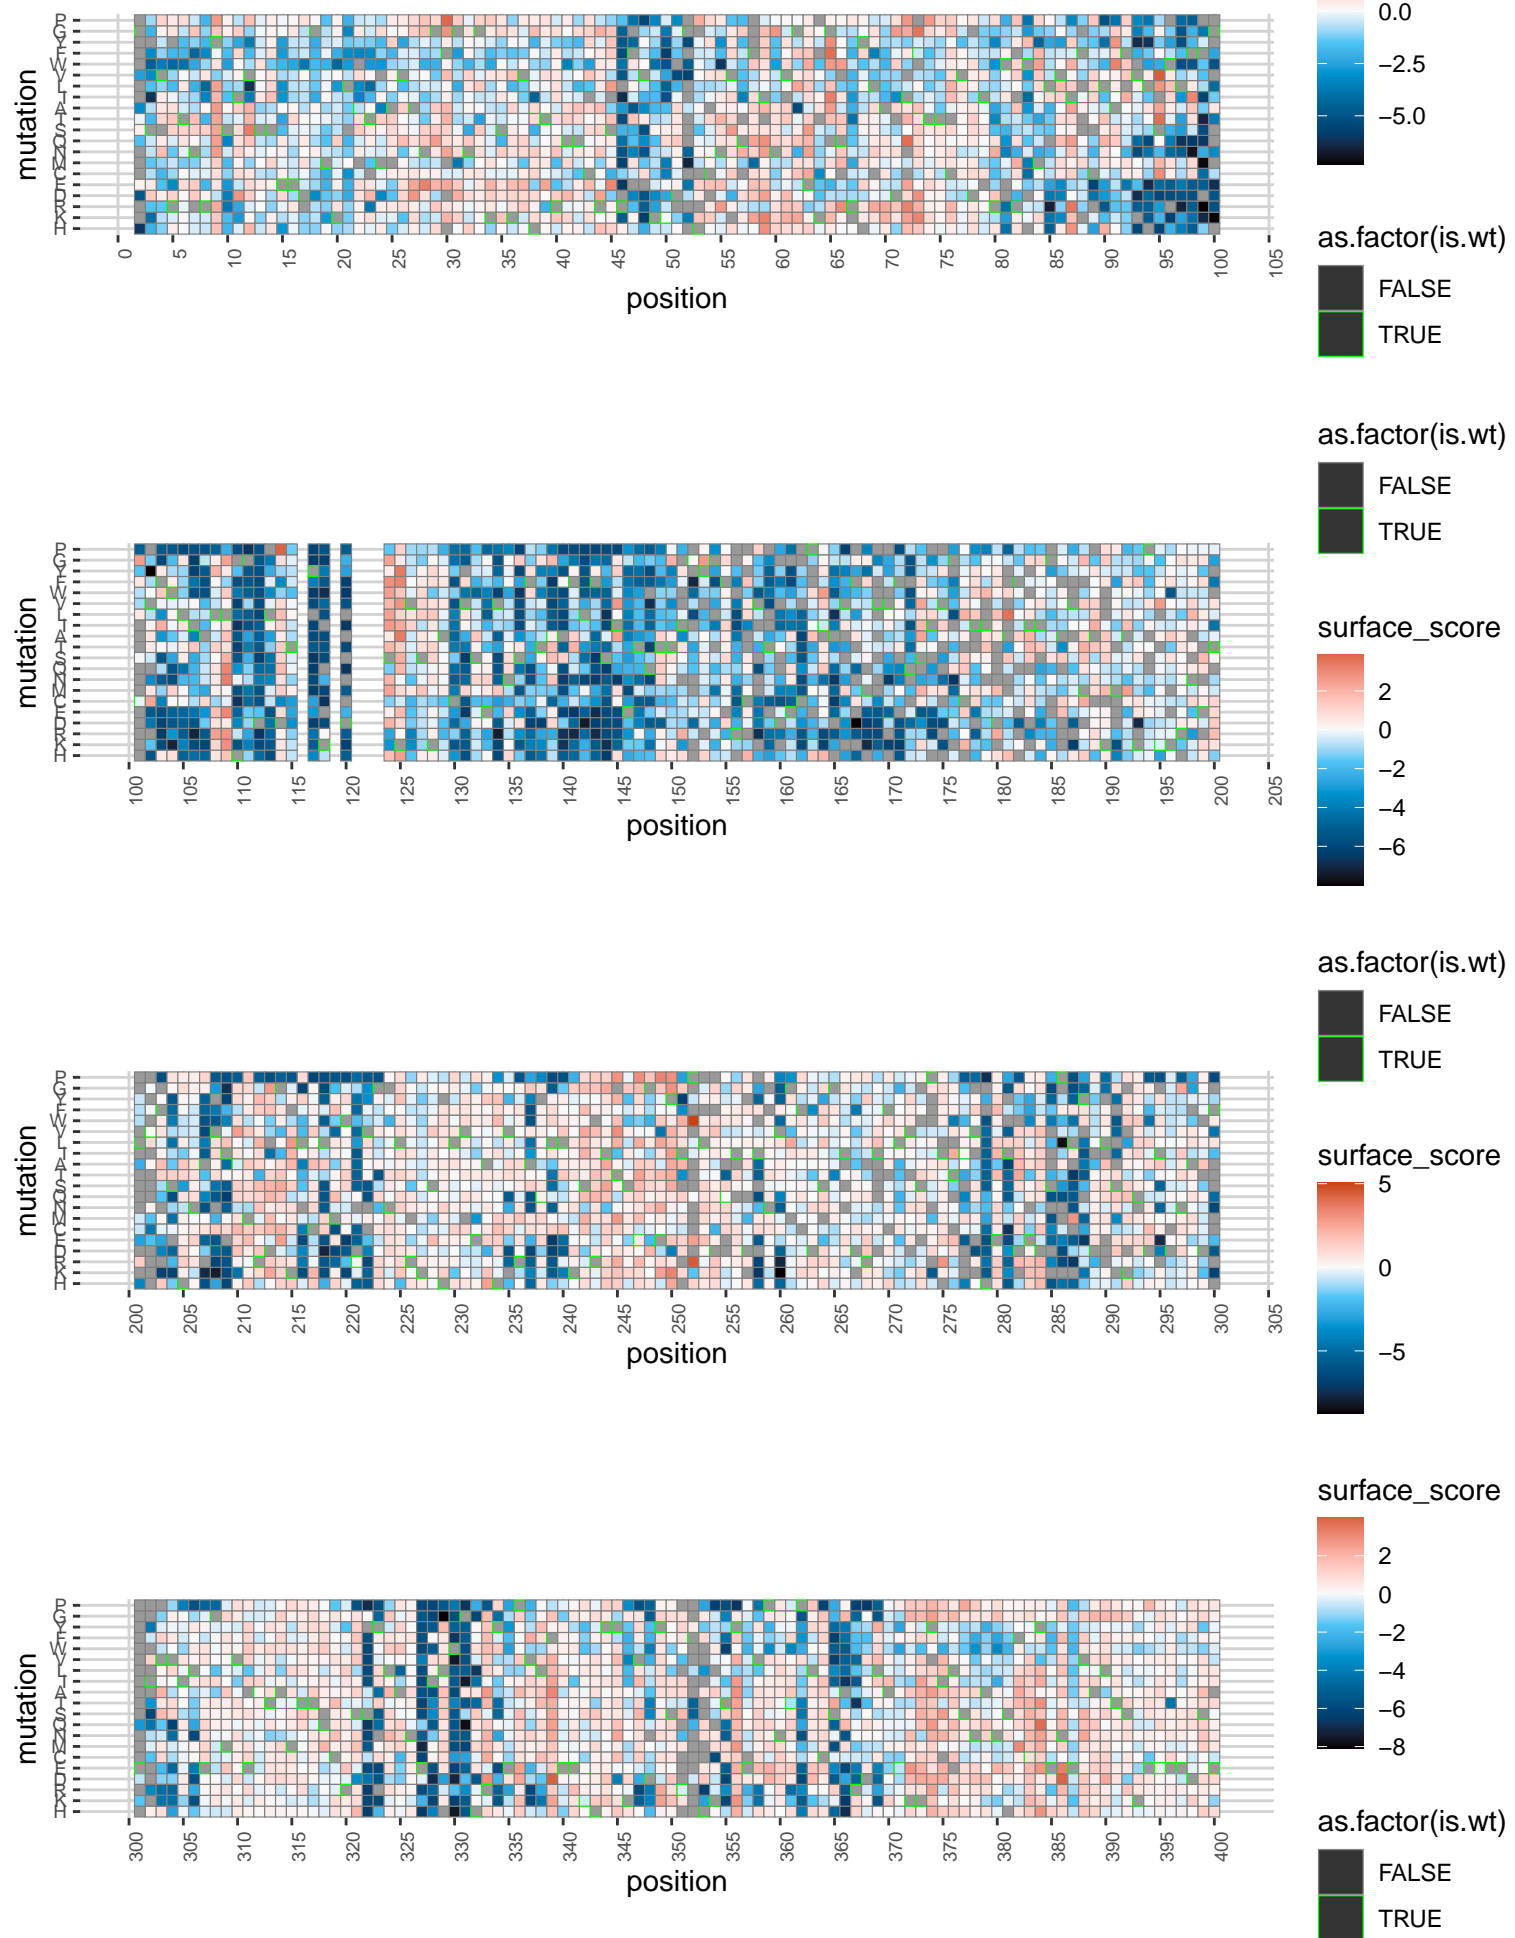

Supplement: data1 [file elife-76903-data1-v2.zip]

Figure 4—figure supplement 2

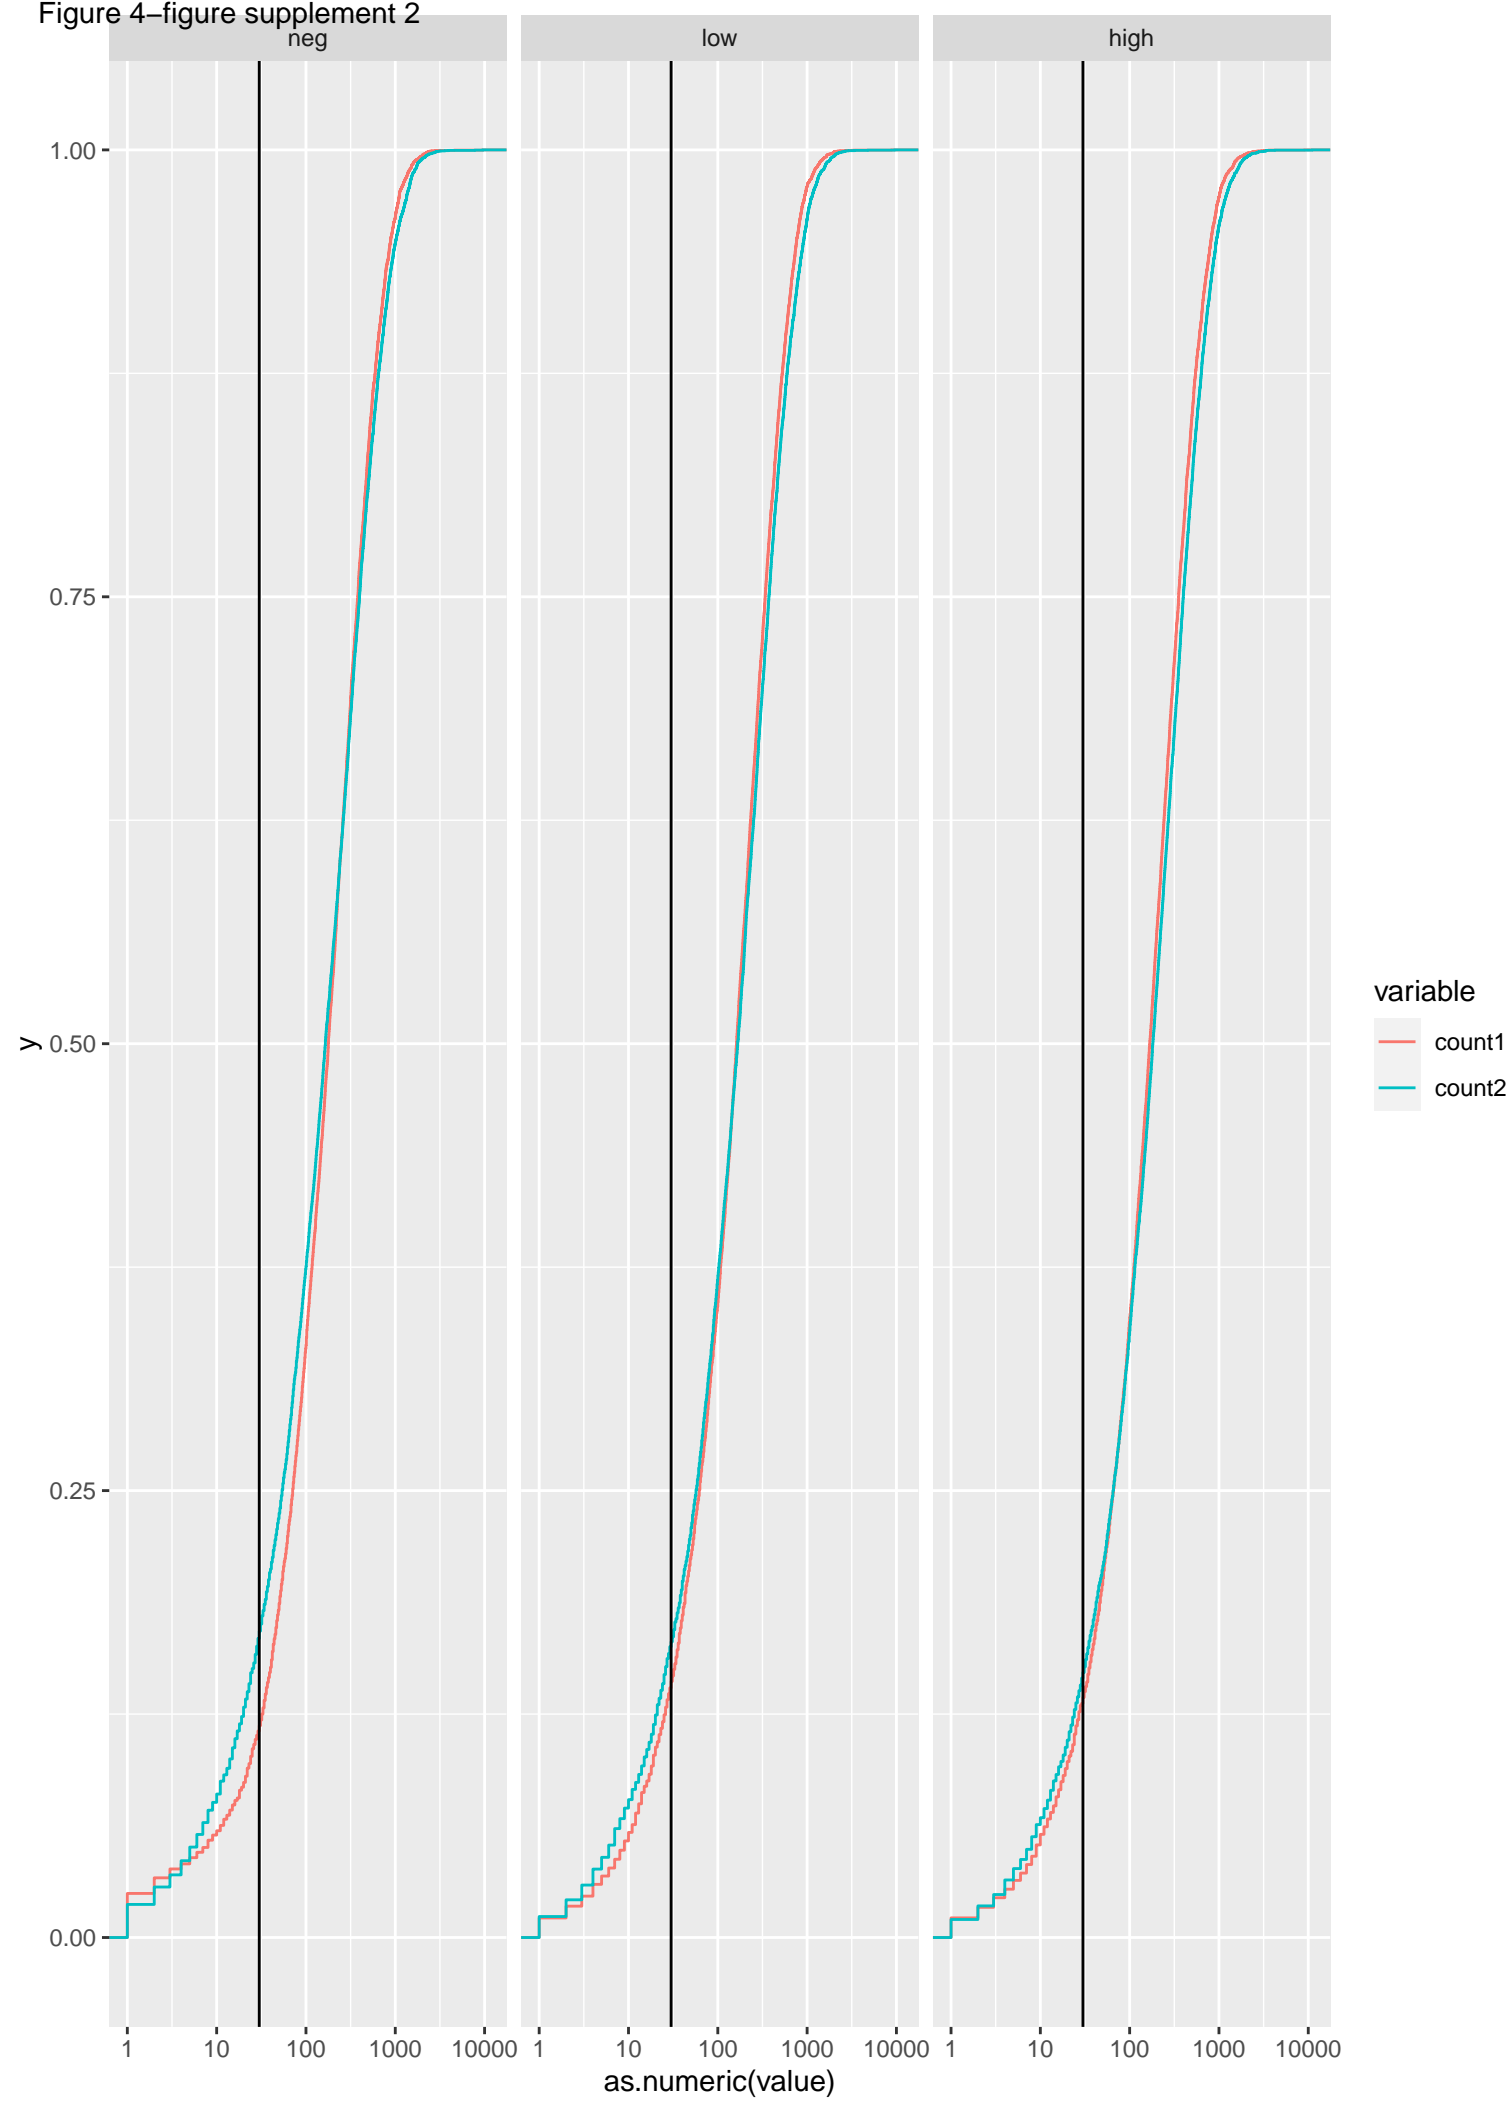

Supplement: data1 [file elife-76903-data1-v2.zip]

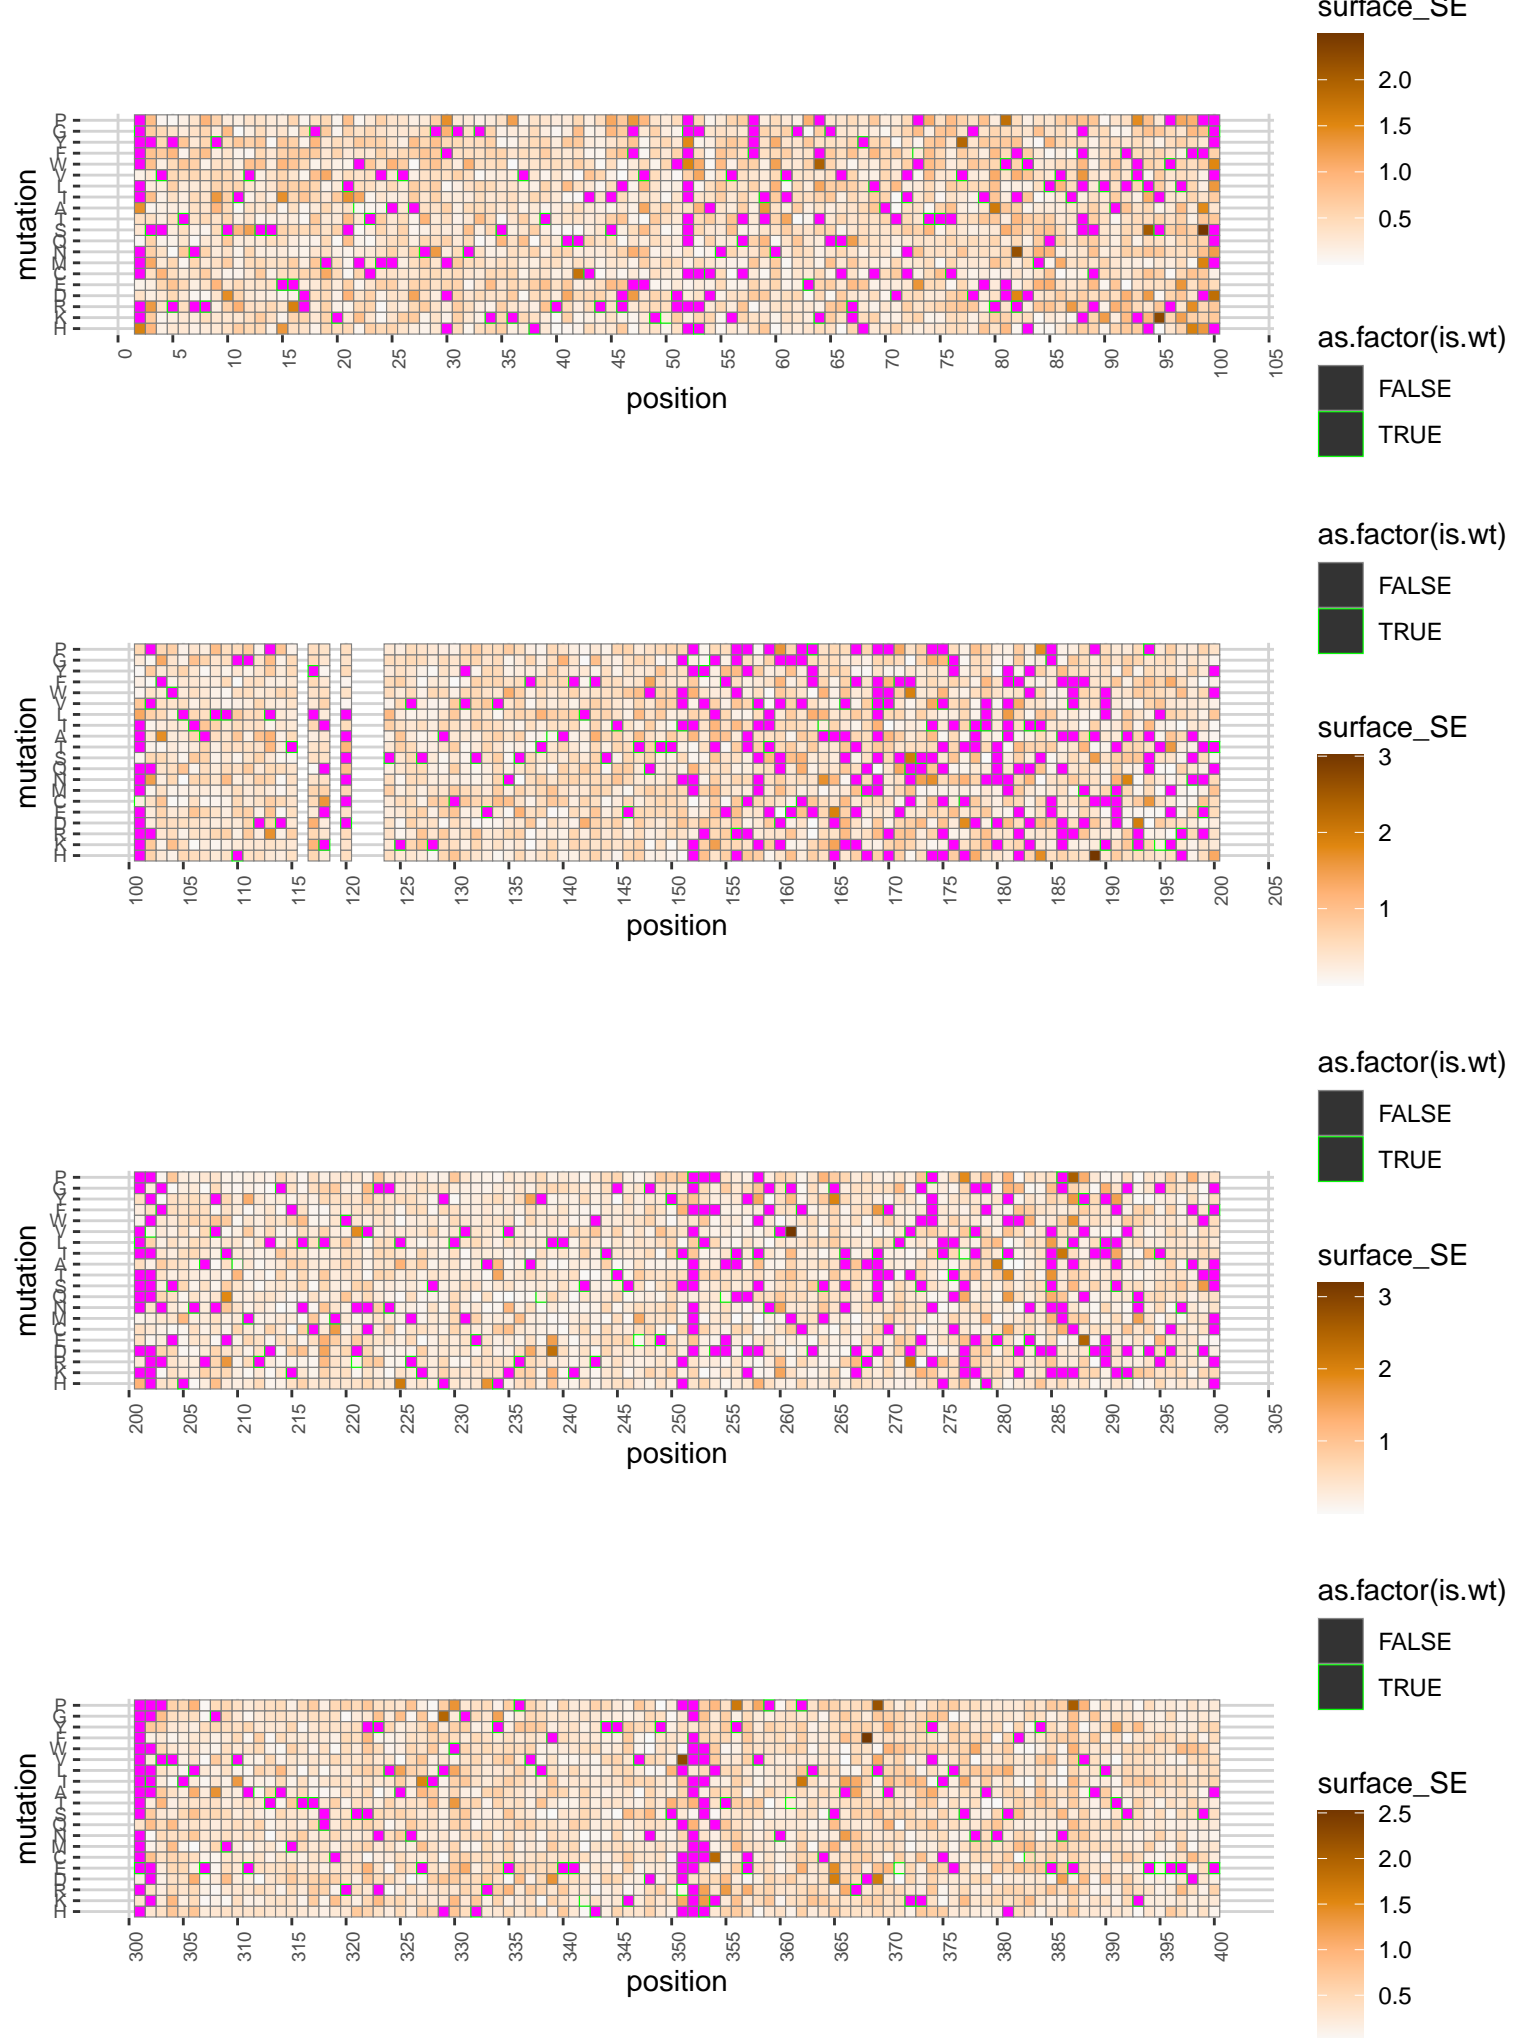

Supplement: data1 [file elife-76903-data1-v2.zip]

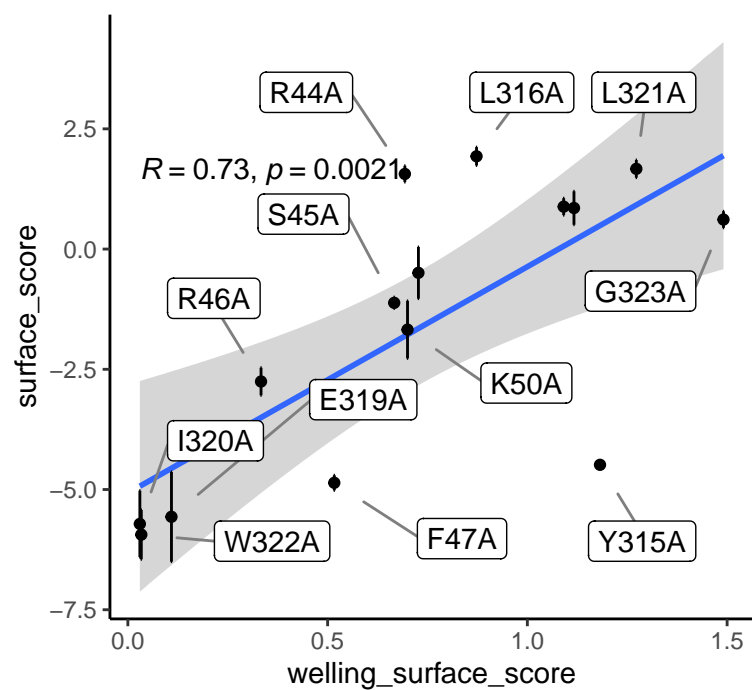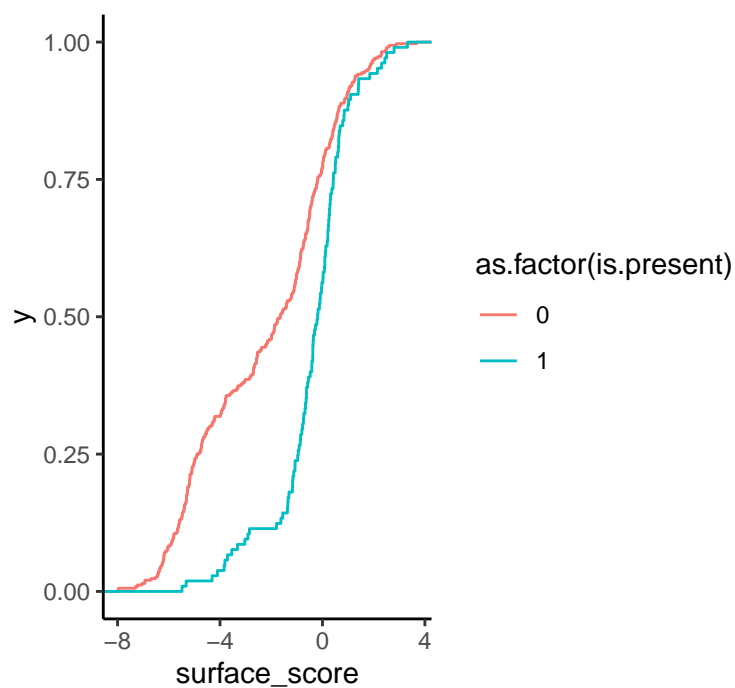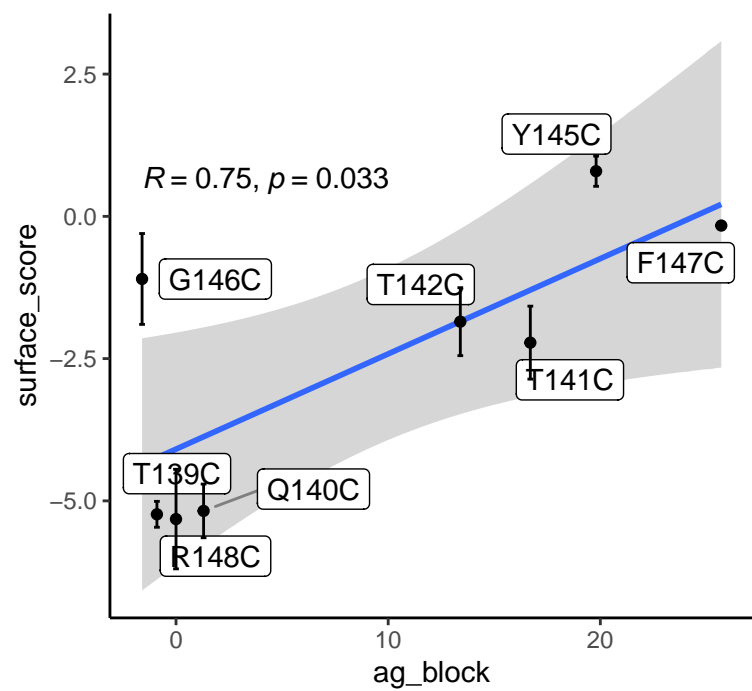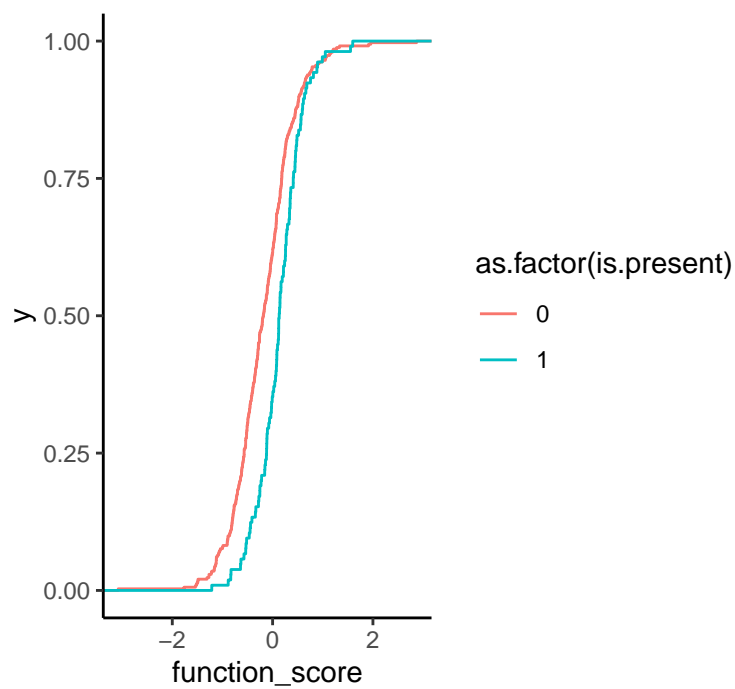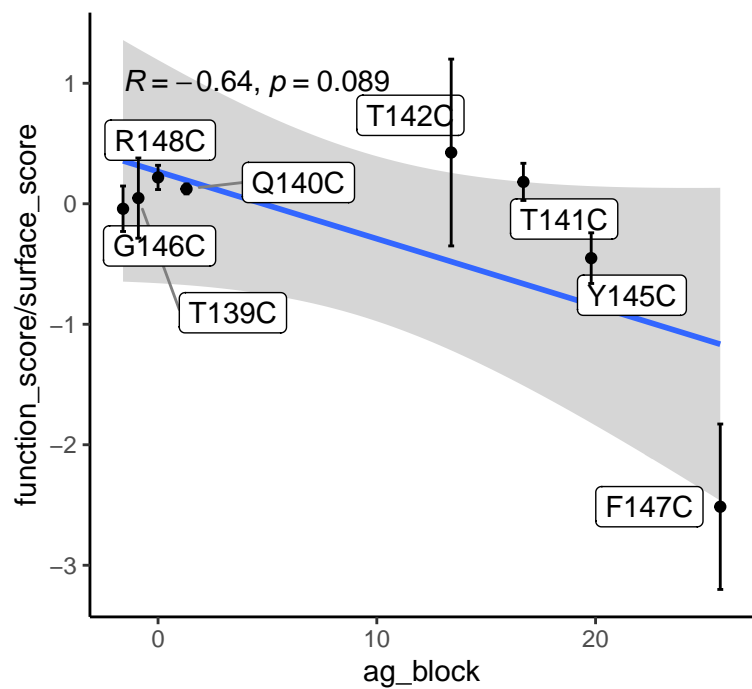

Supplement: data1 [file elife-76903-data1-v2.zip]

Figure 2—figure supplement 3

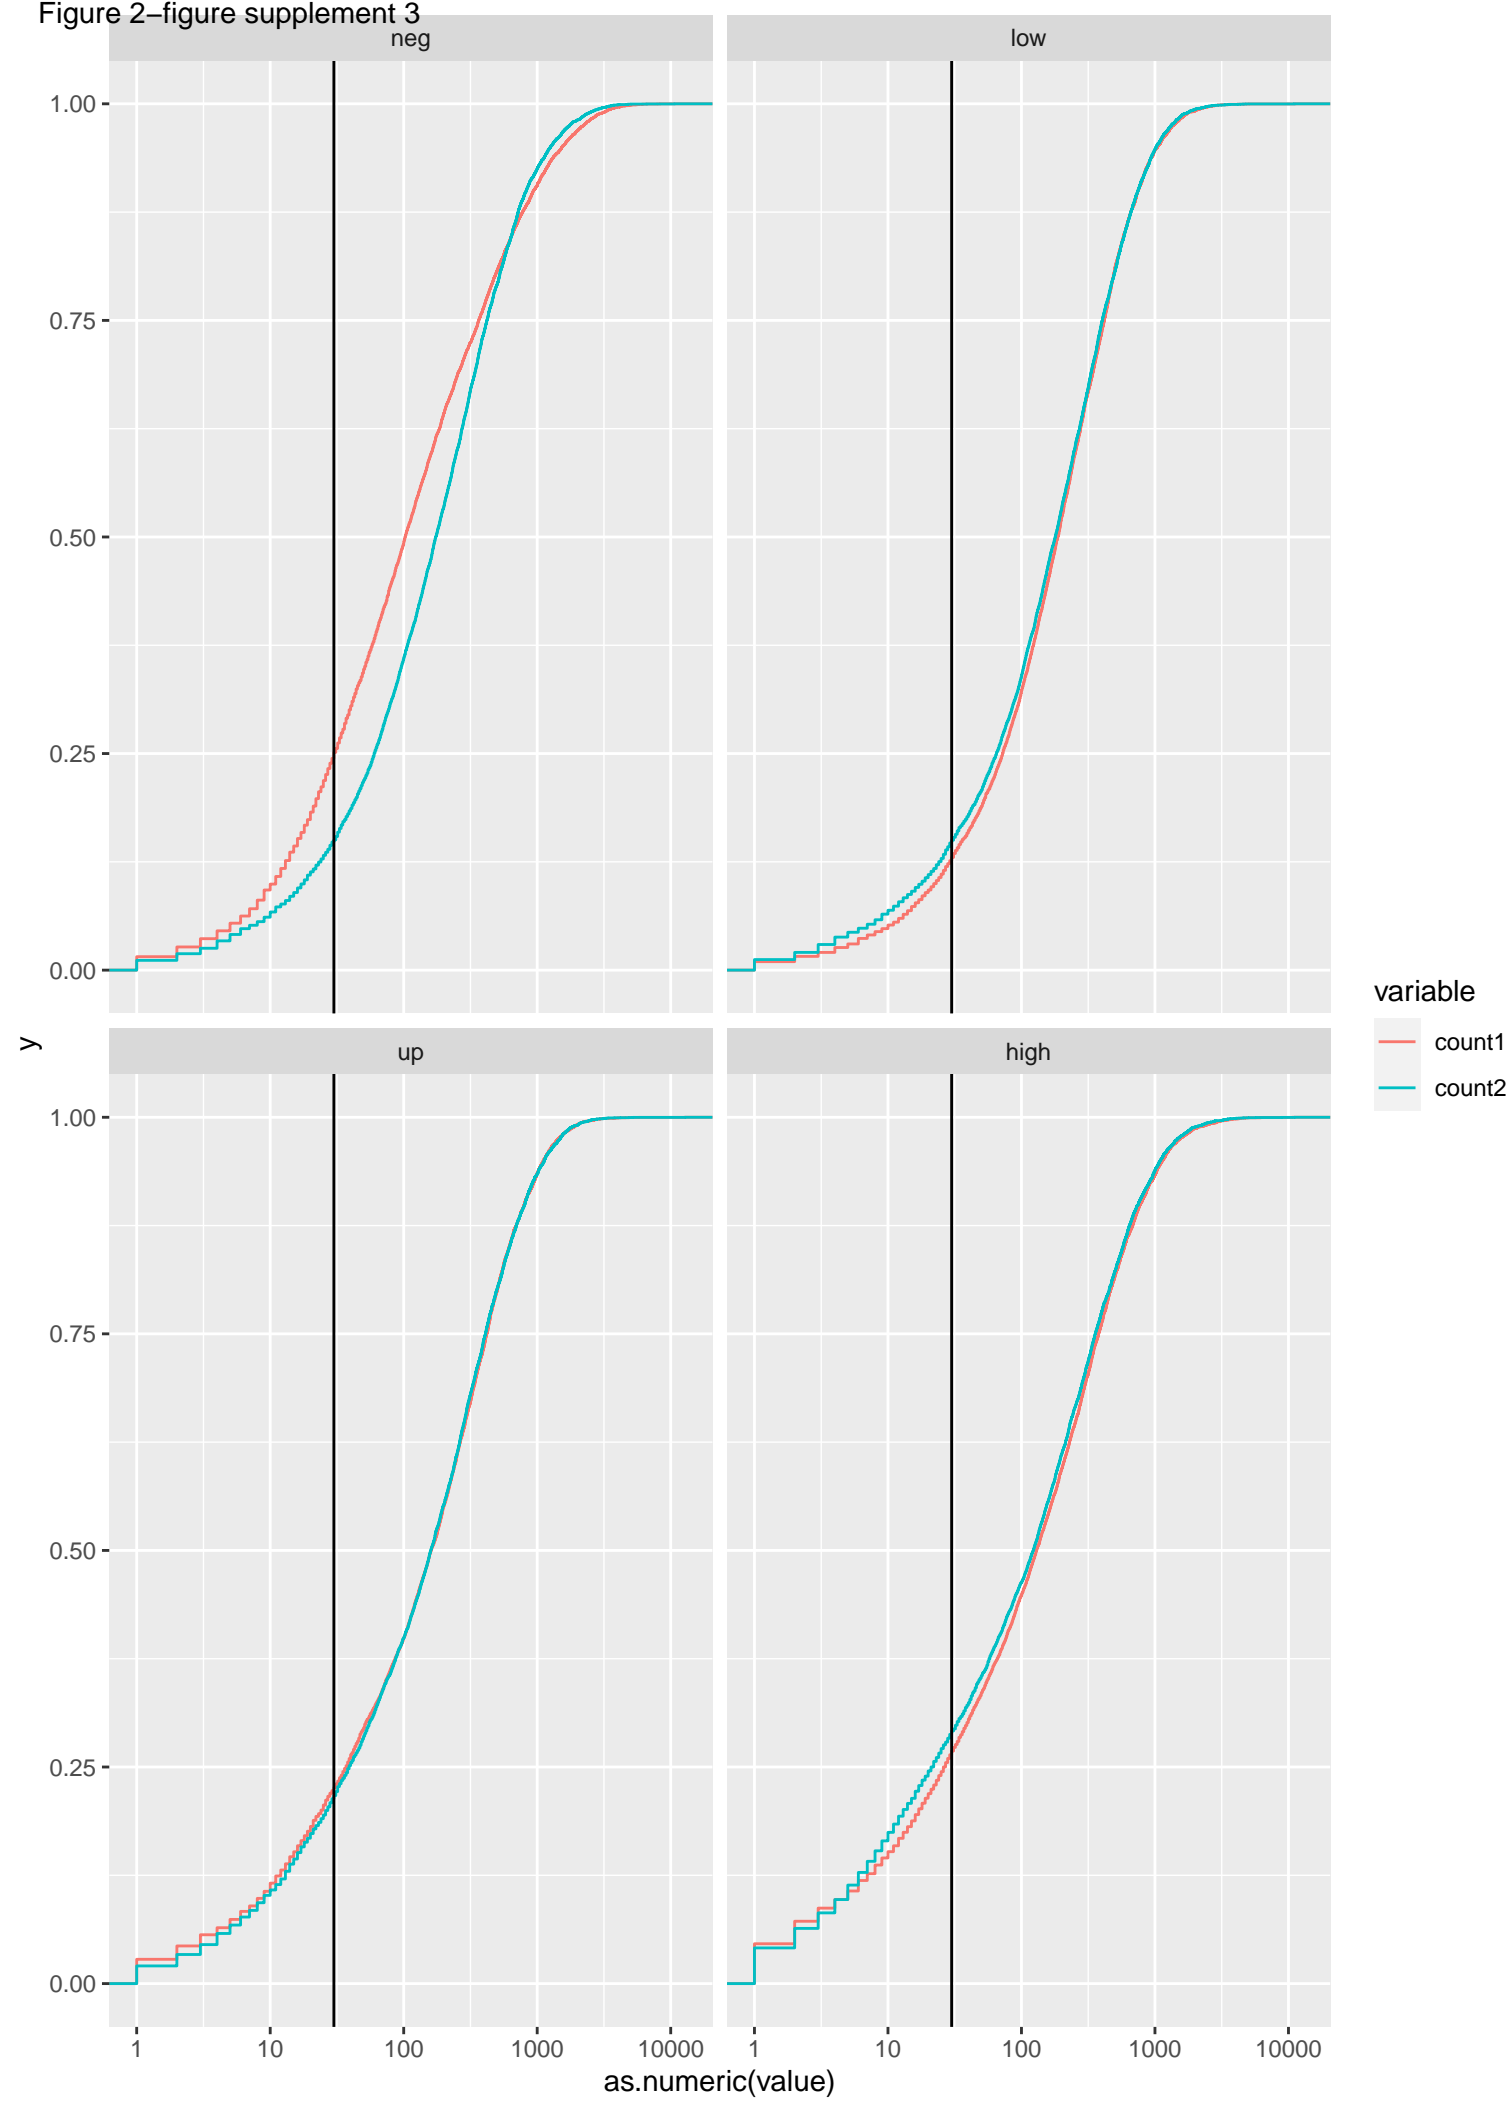

Supplement: data1 [file elife-76903-data1-v2.zip]

Figure 4—figure supplement 4b

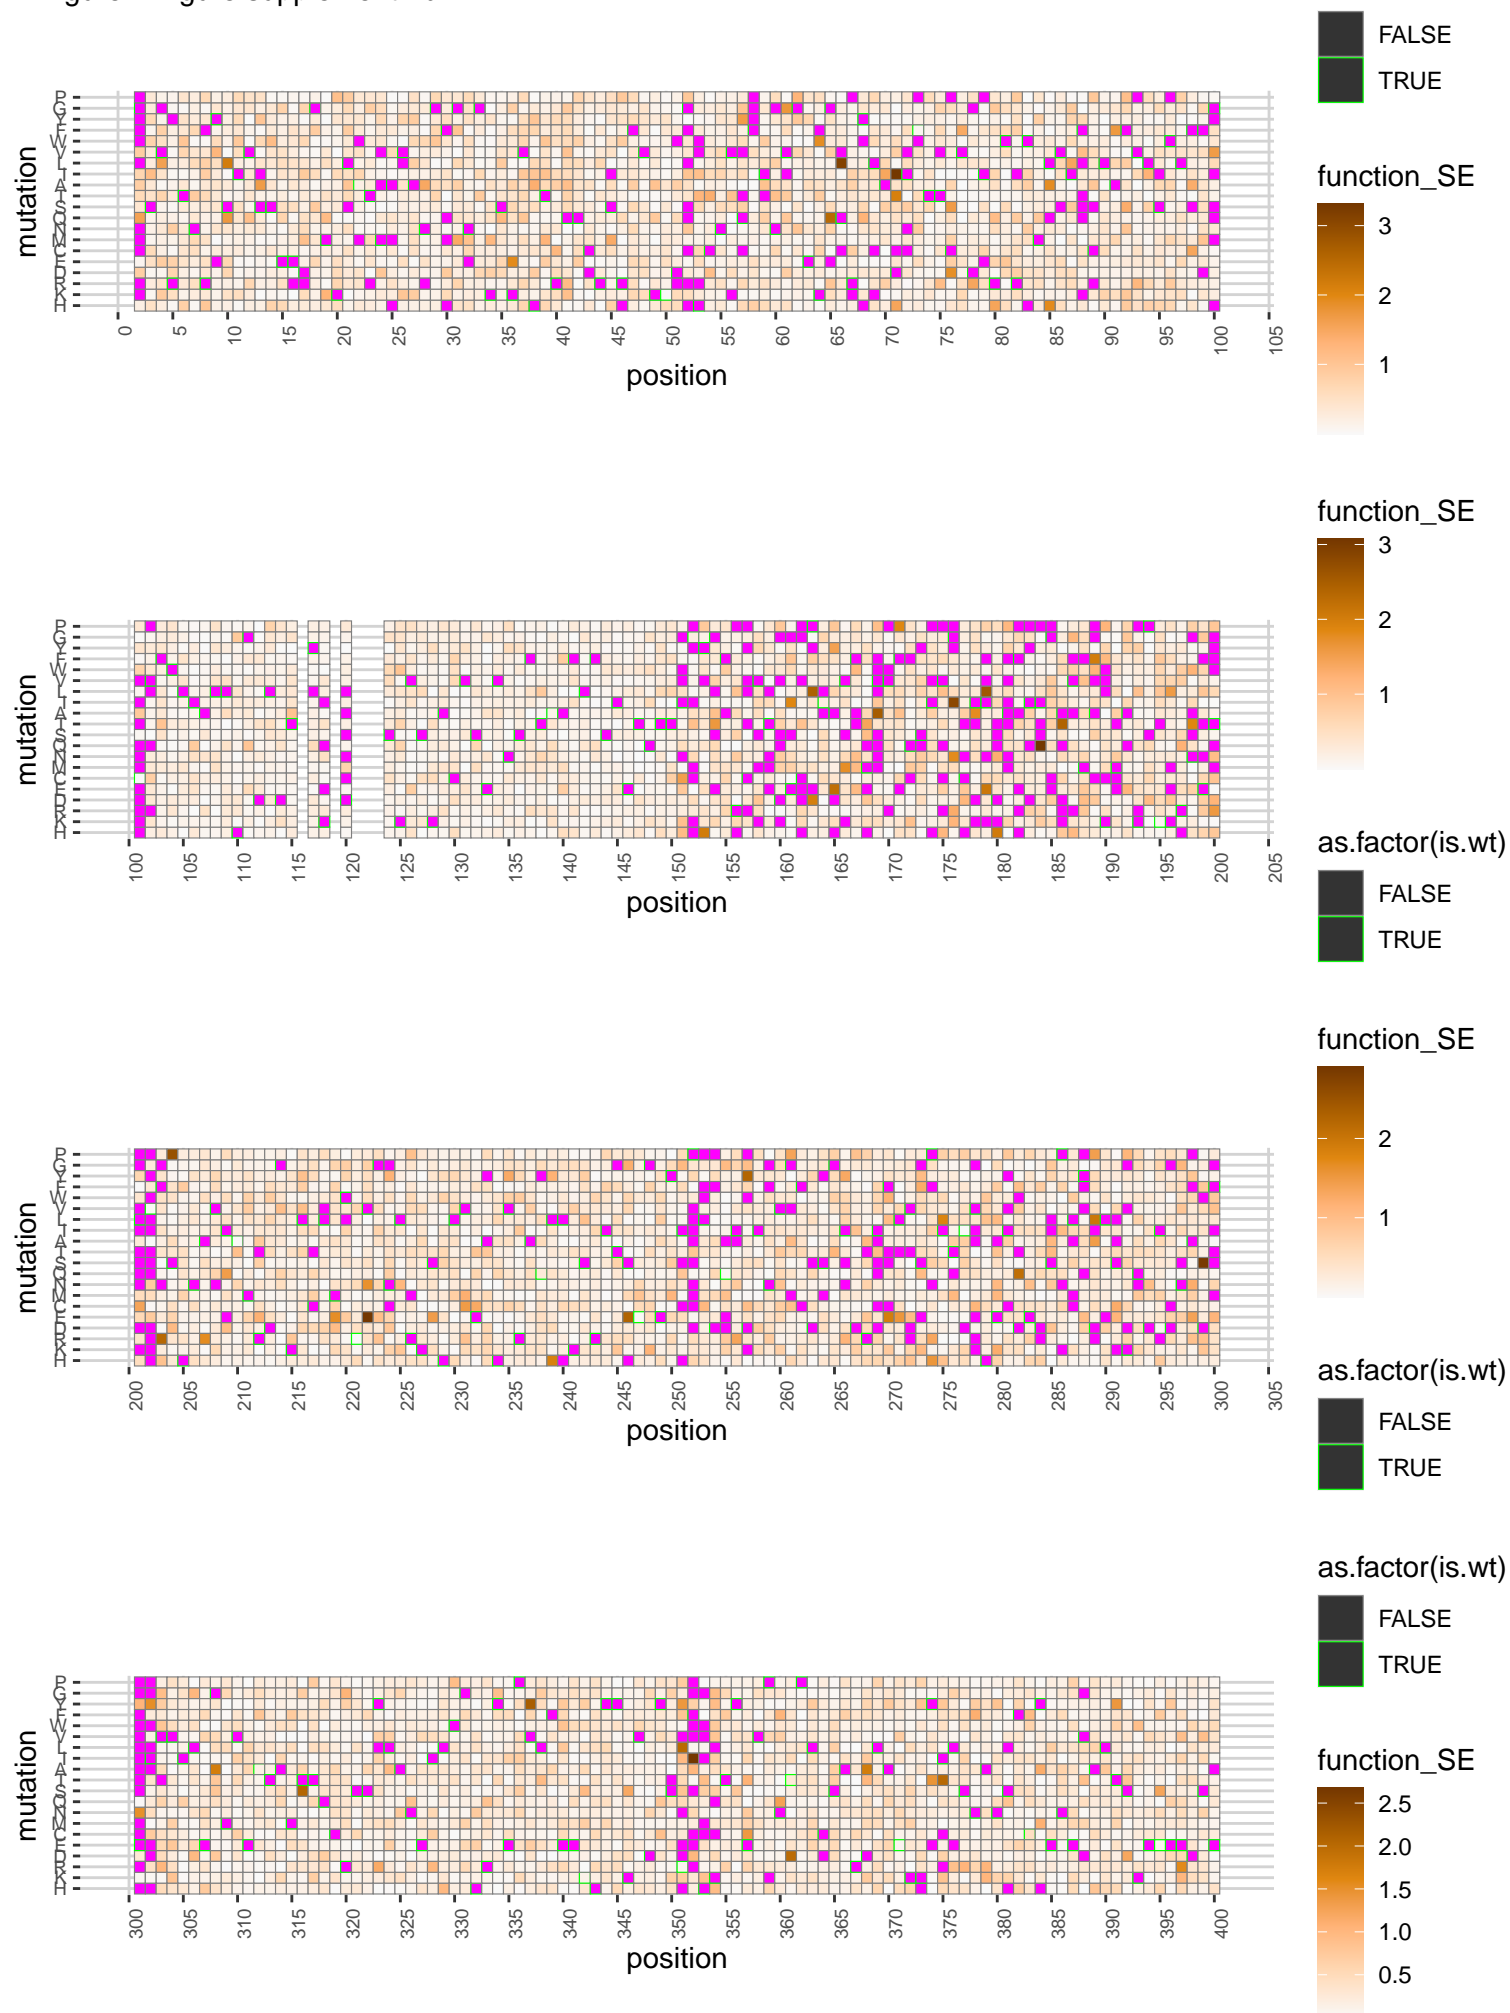

Supplement: data1 [file elife-76903-data1-v2.zip]

Figure 4a

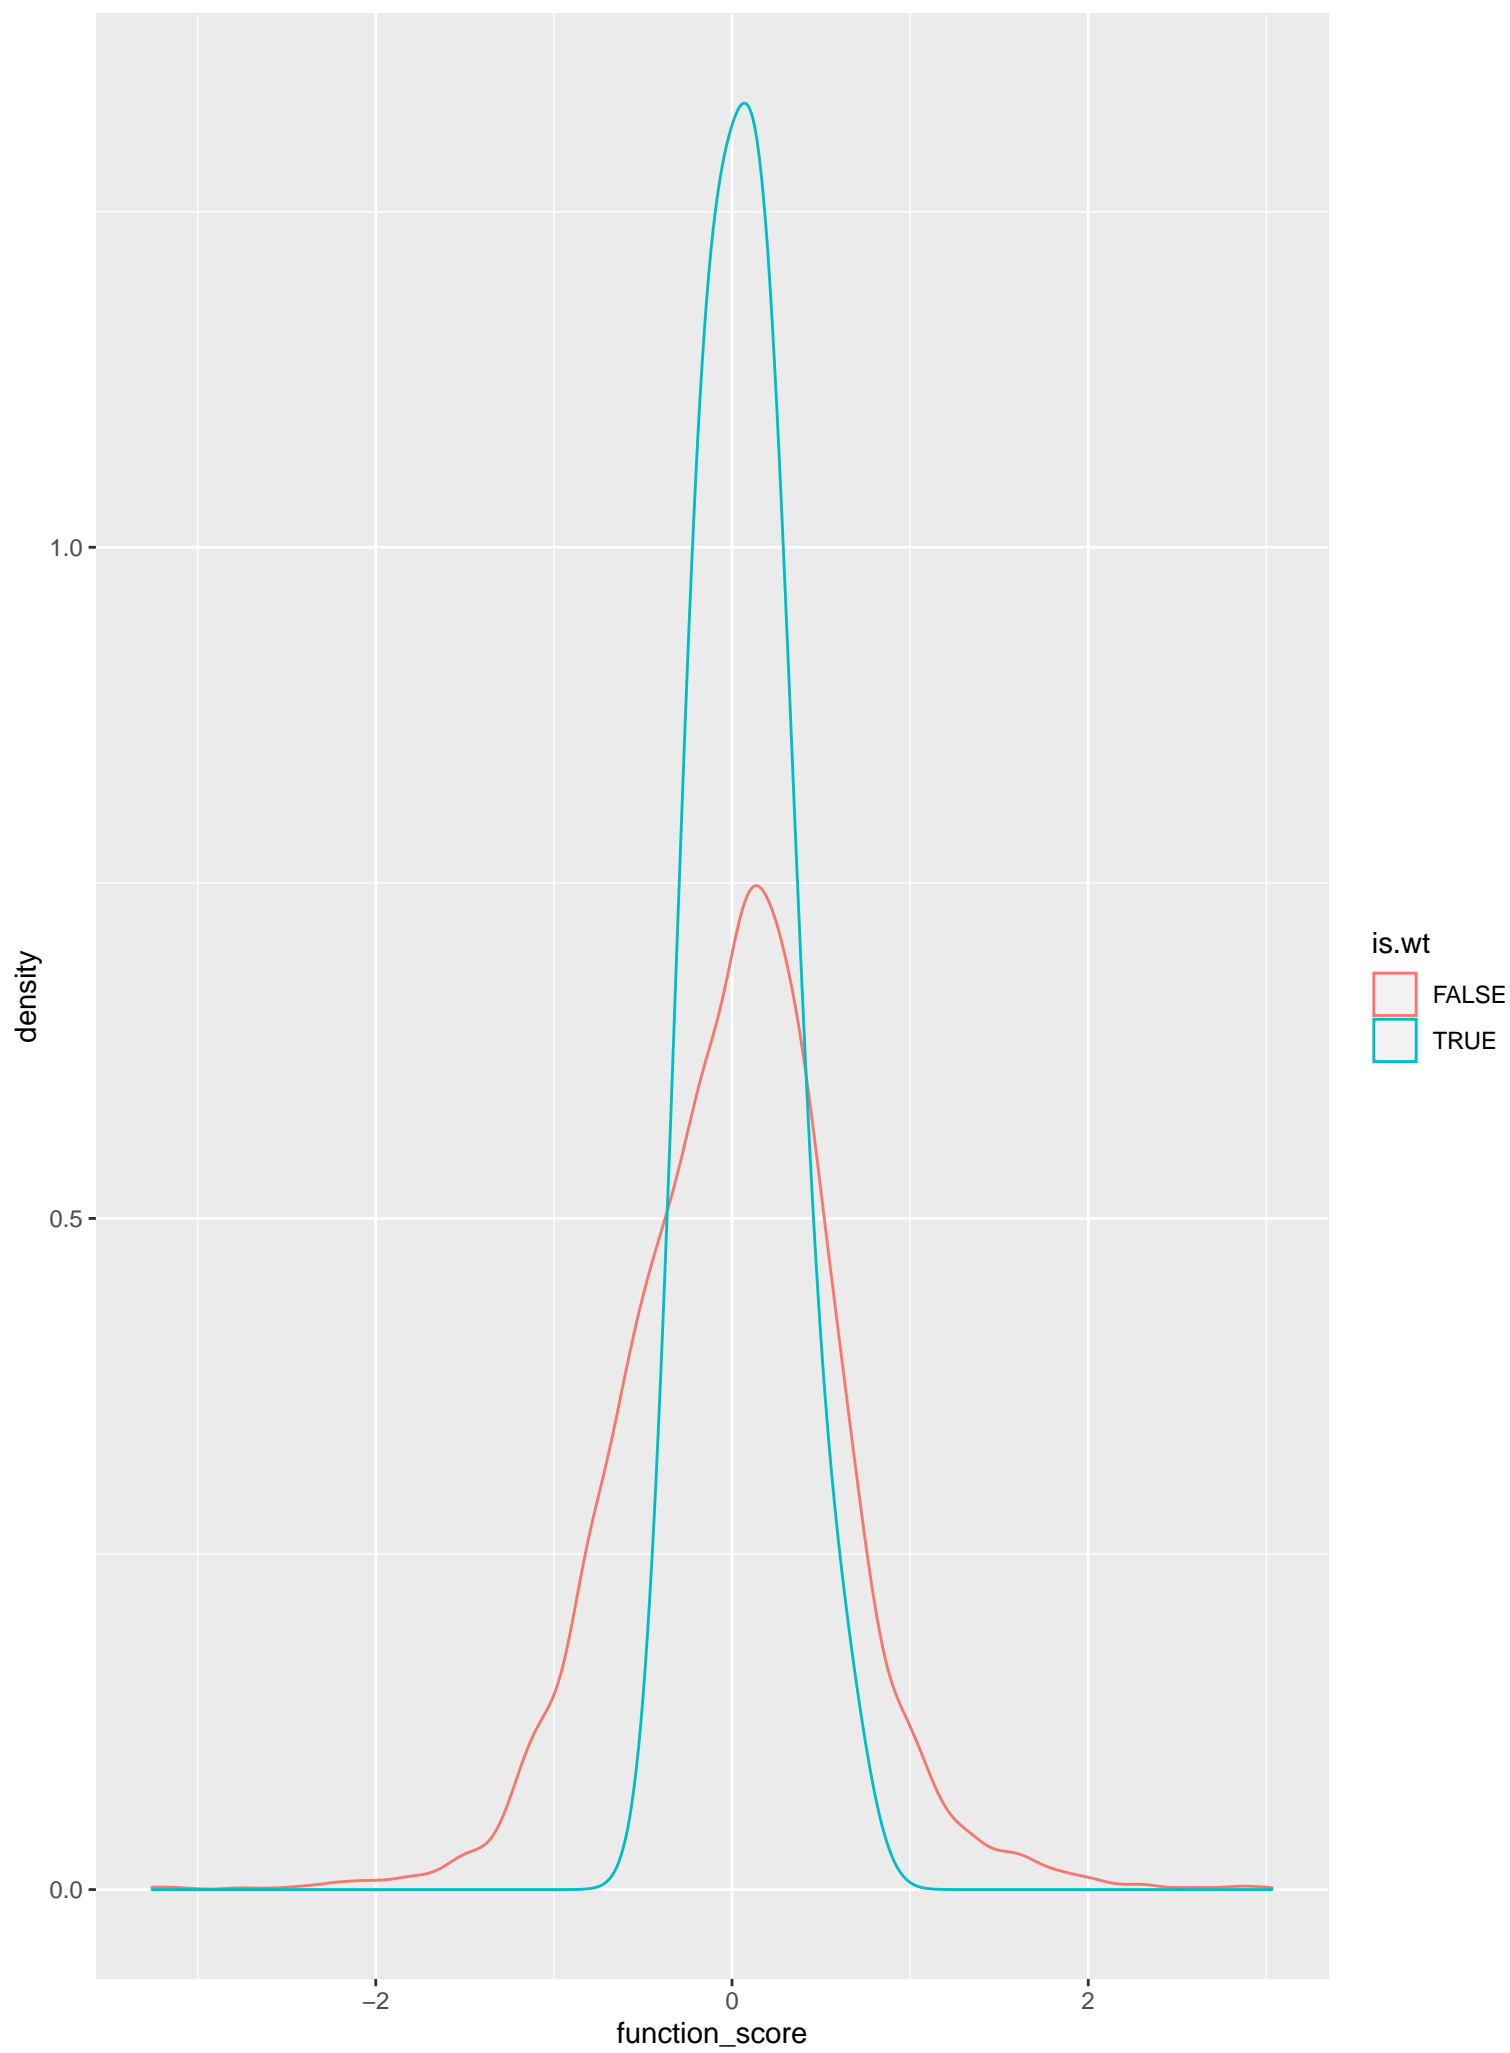

Supplement: data1 [file elife-76903-data1-v2.zip]

Figure 2-figure supplement 2

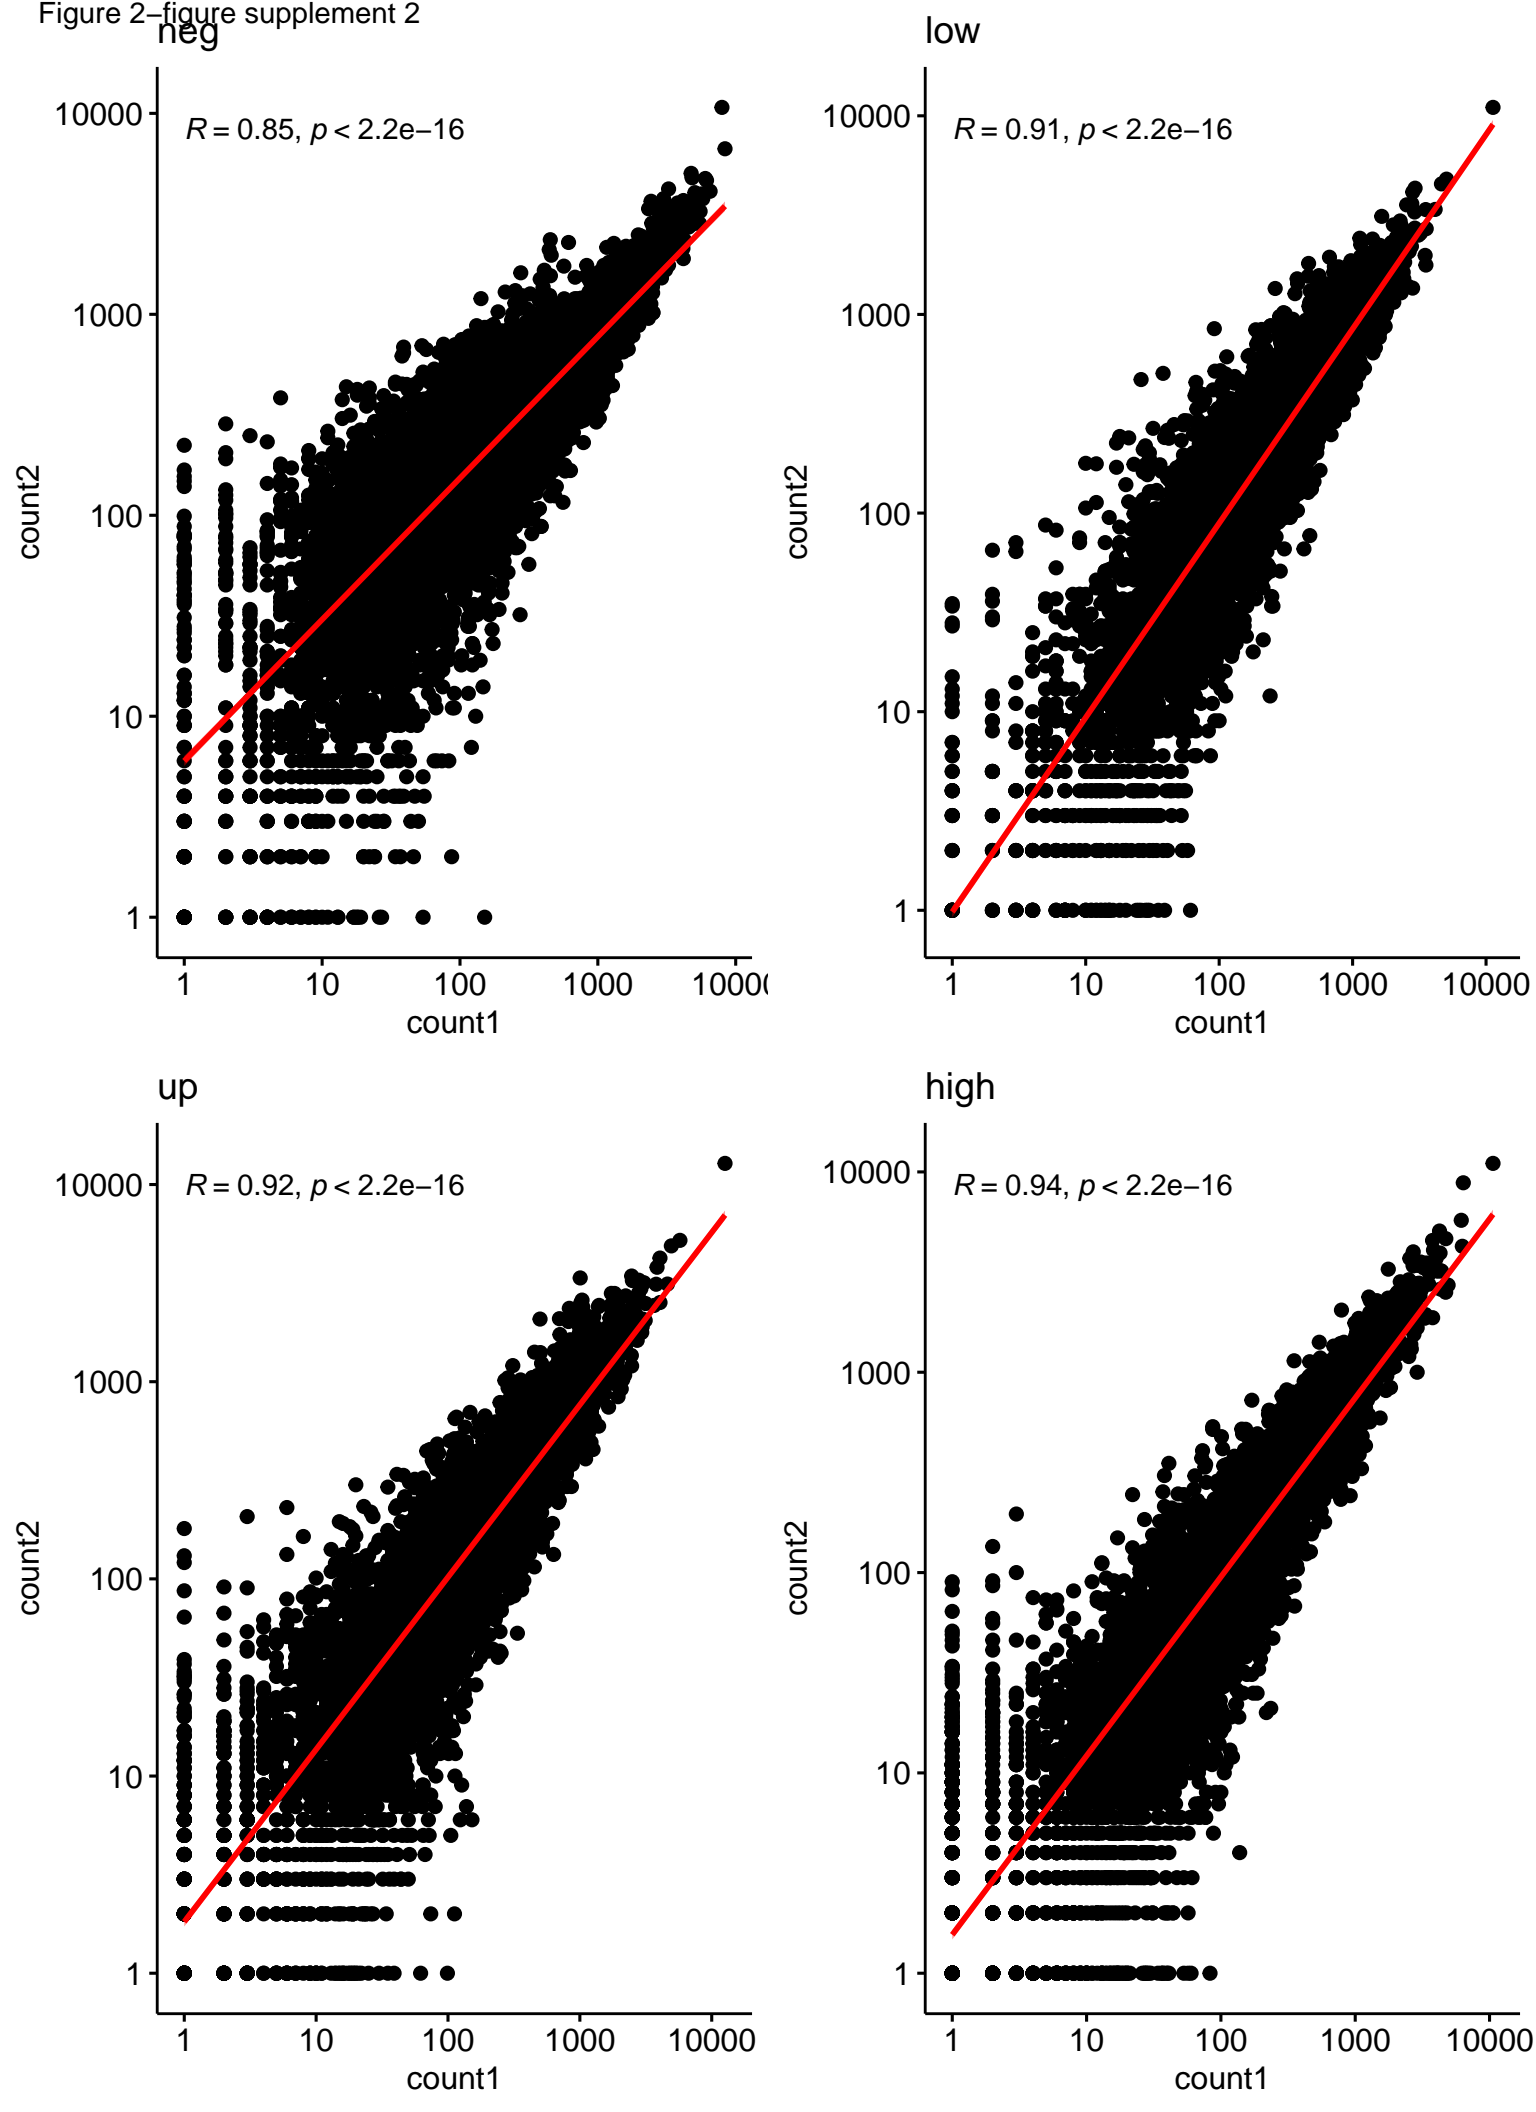

Supplement: data1 [file elife-76903-data1-v2.zip]

Figure 7d-e  
cv\_df function by clinvar assignment

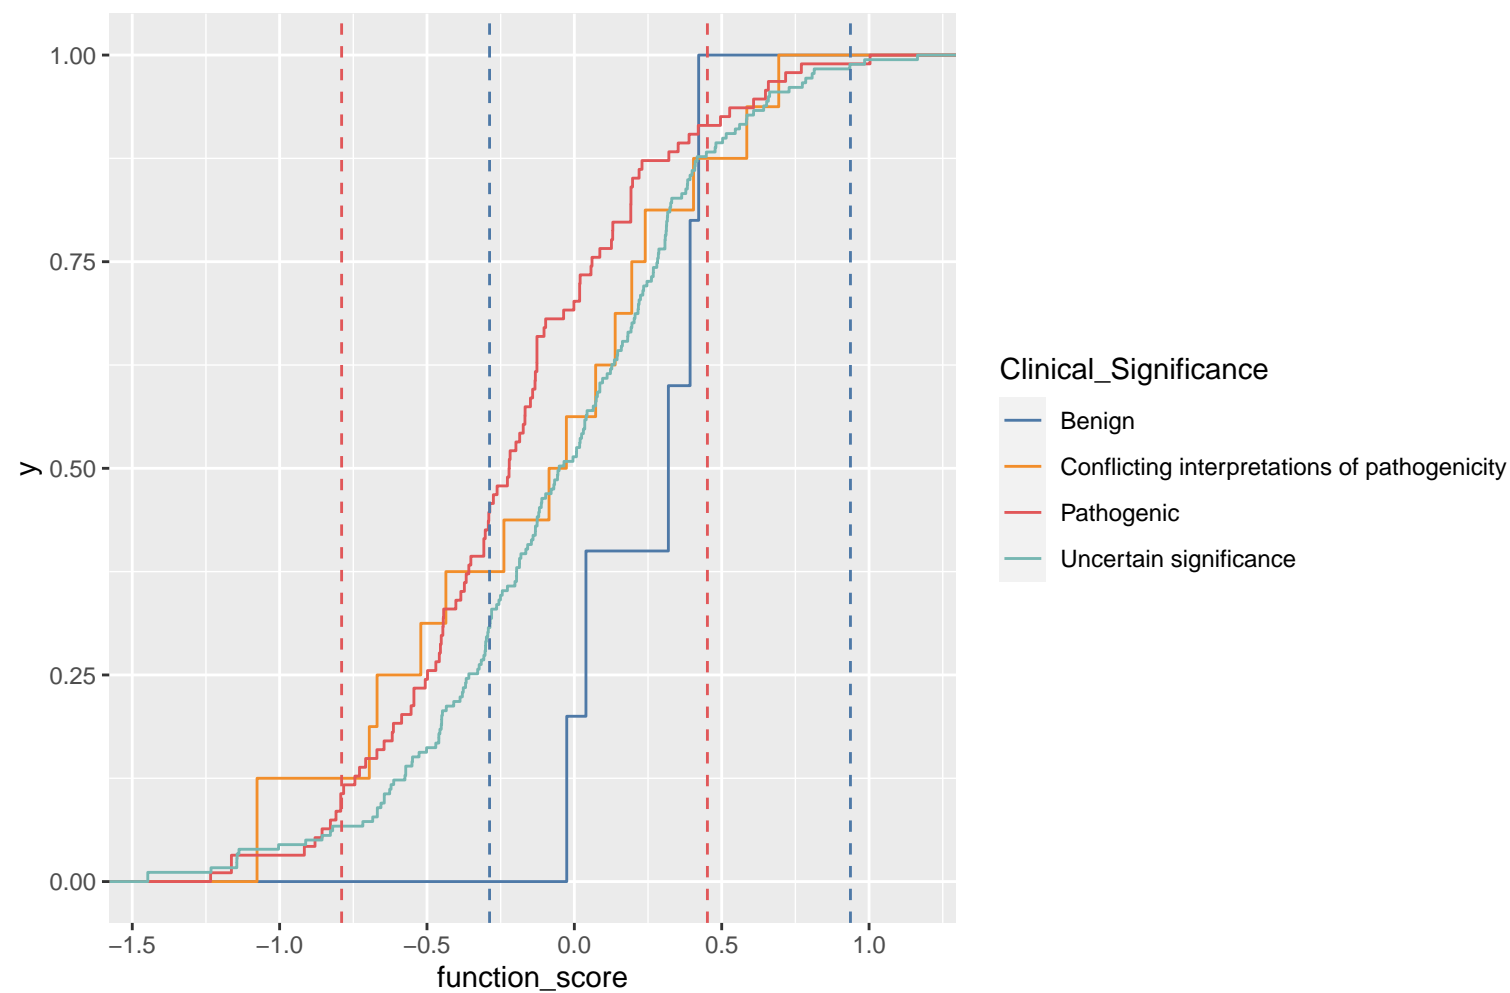

cv\_df function by clinvar assignment

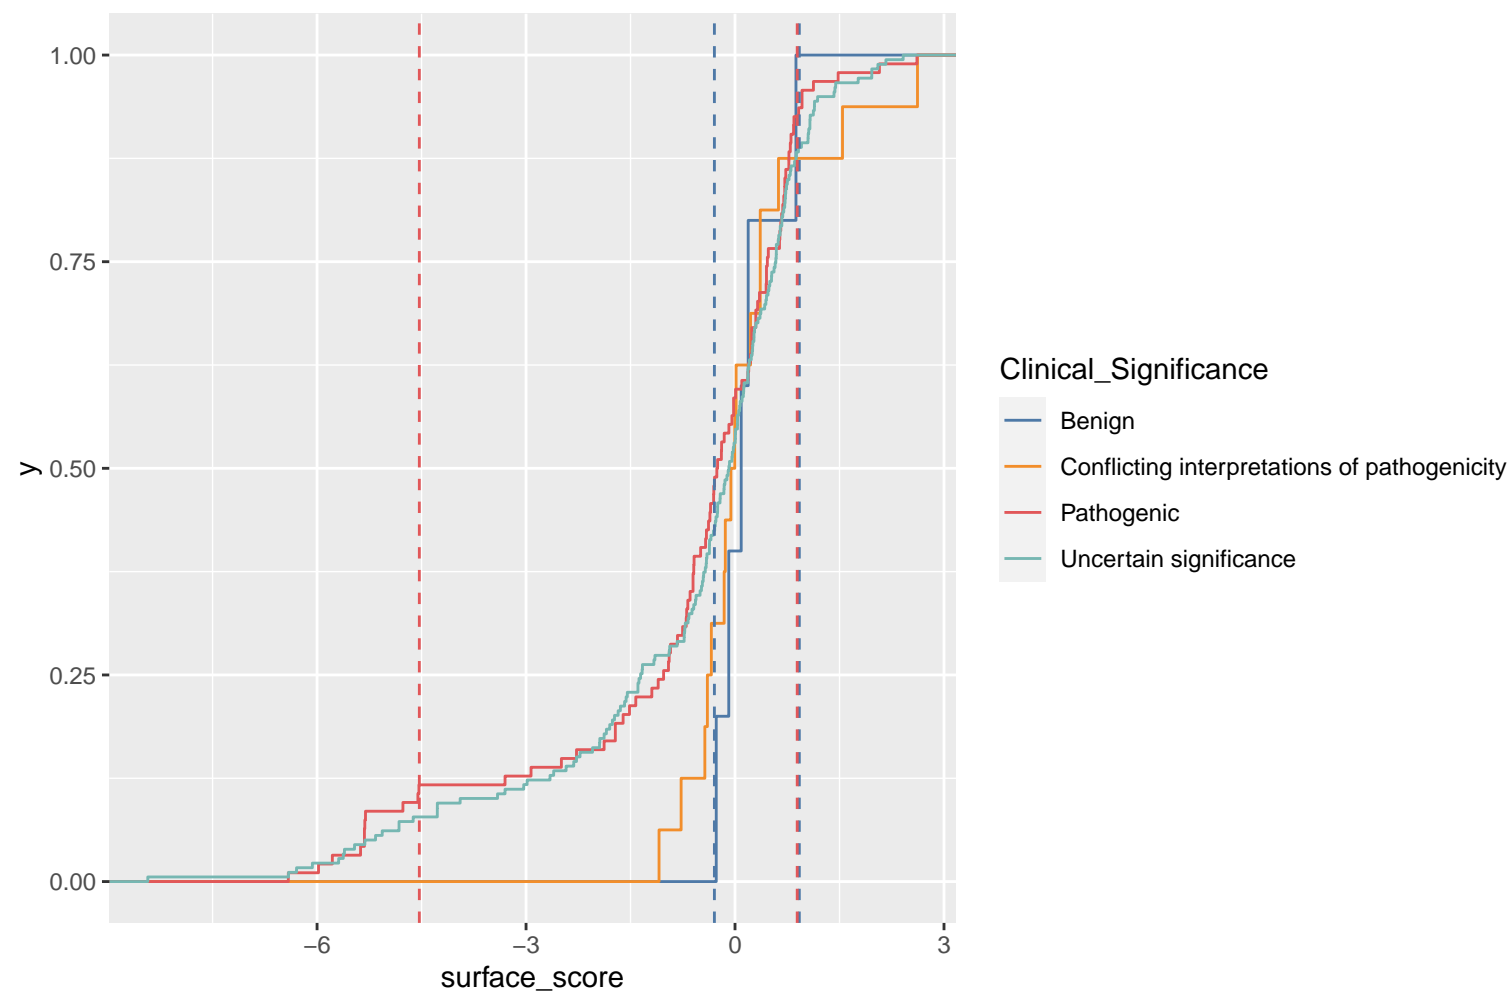

Supplement: data1 [file elife-76903-data1-v2.zip]

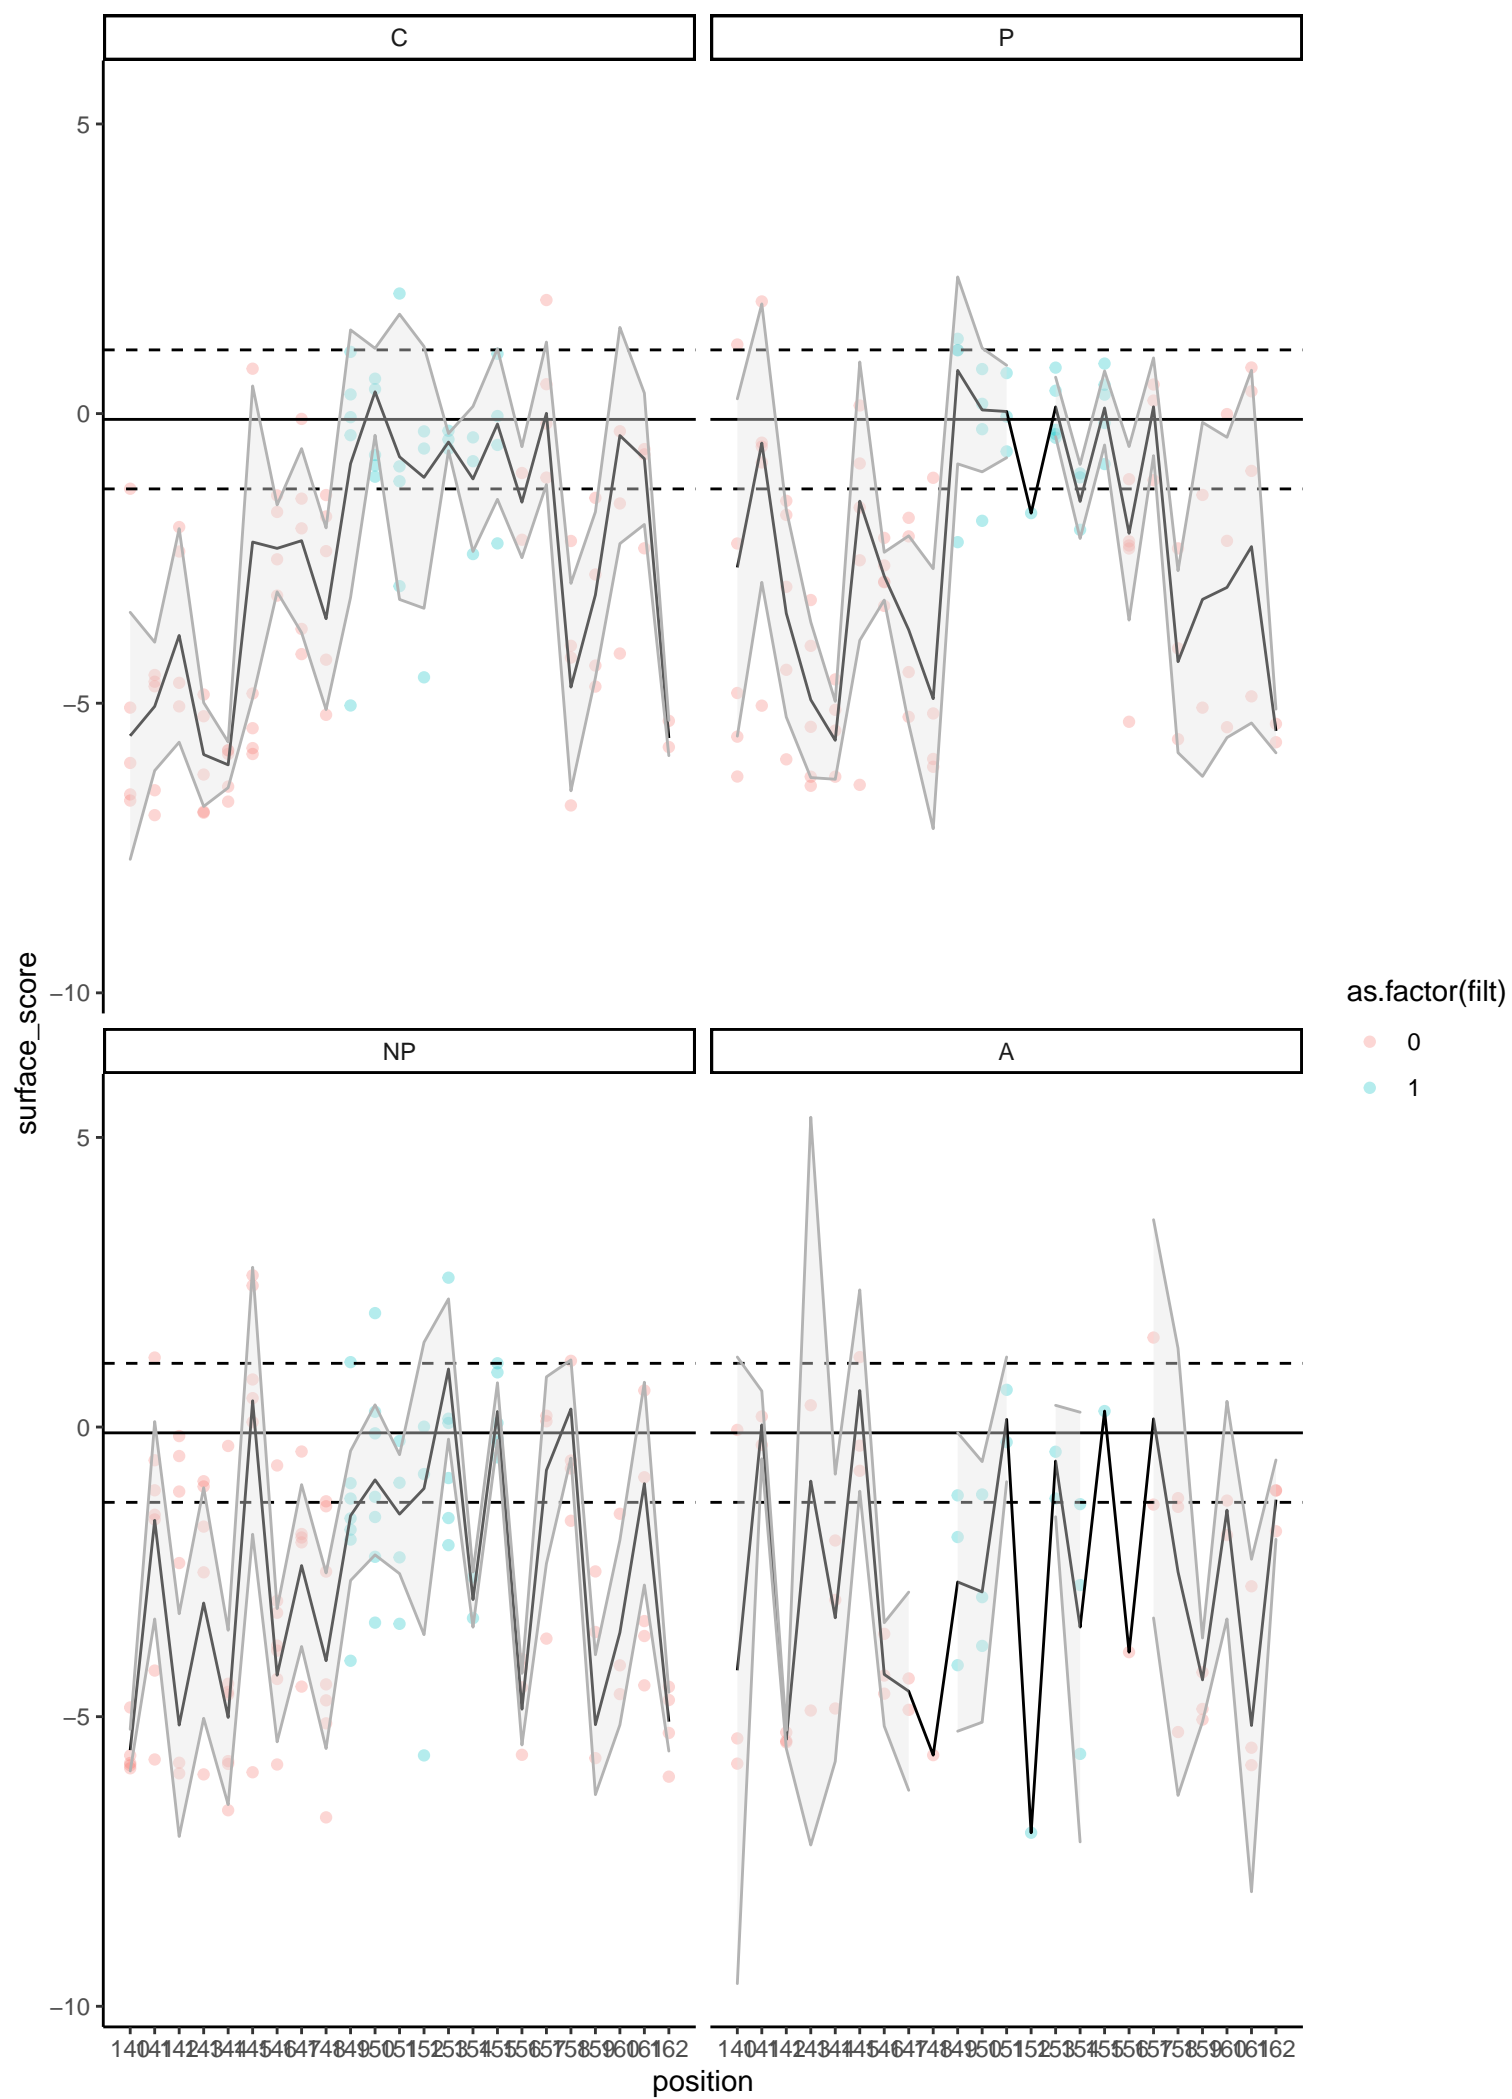

Supplement: data1 [file elife-76903-data1-v2.zip]

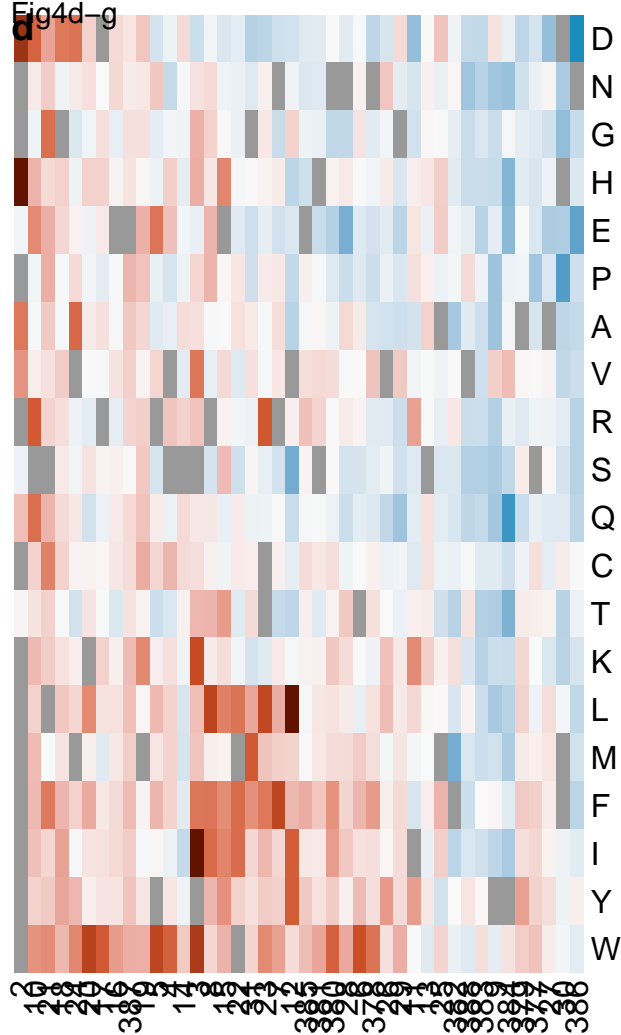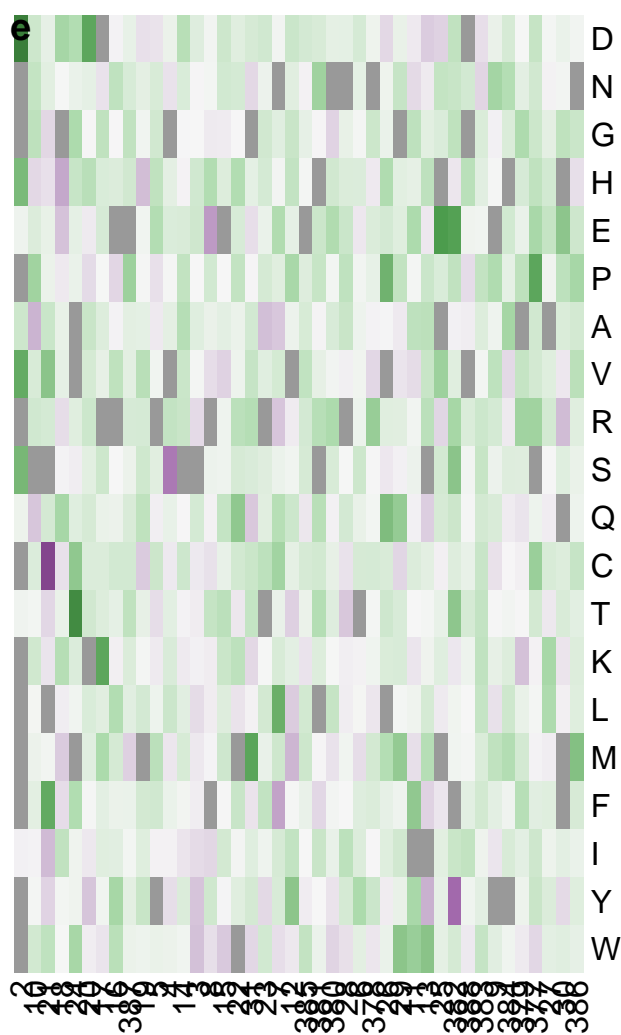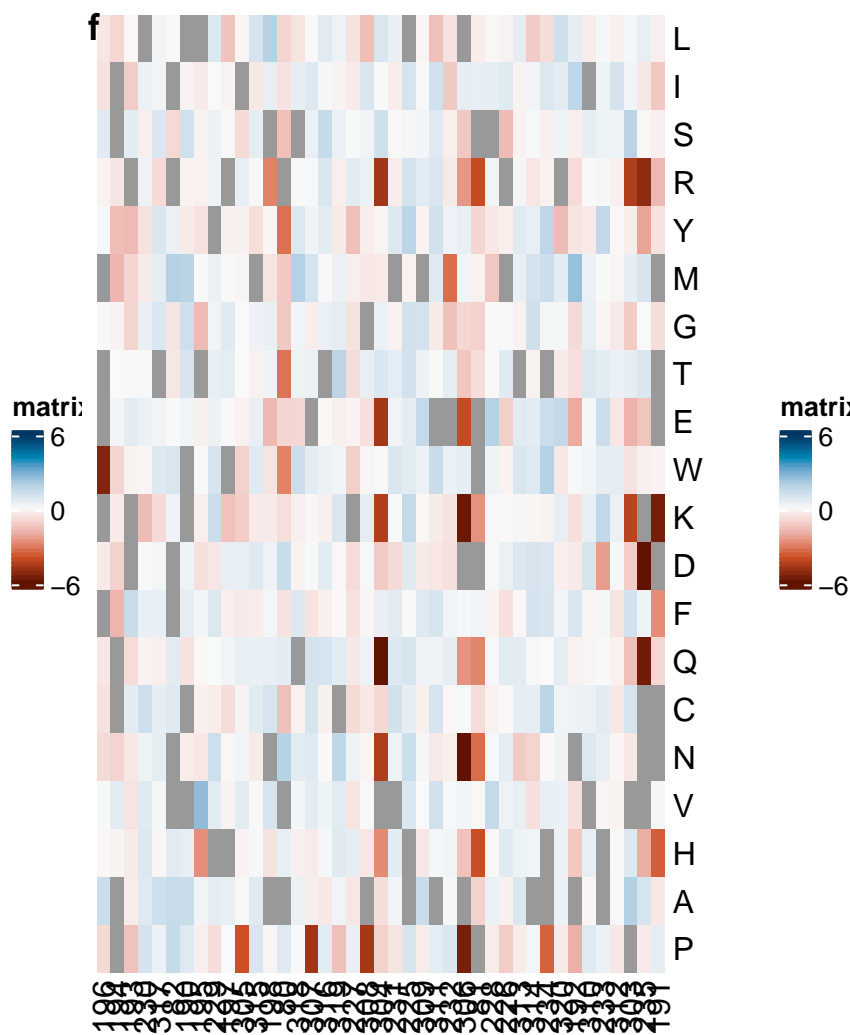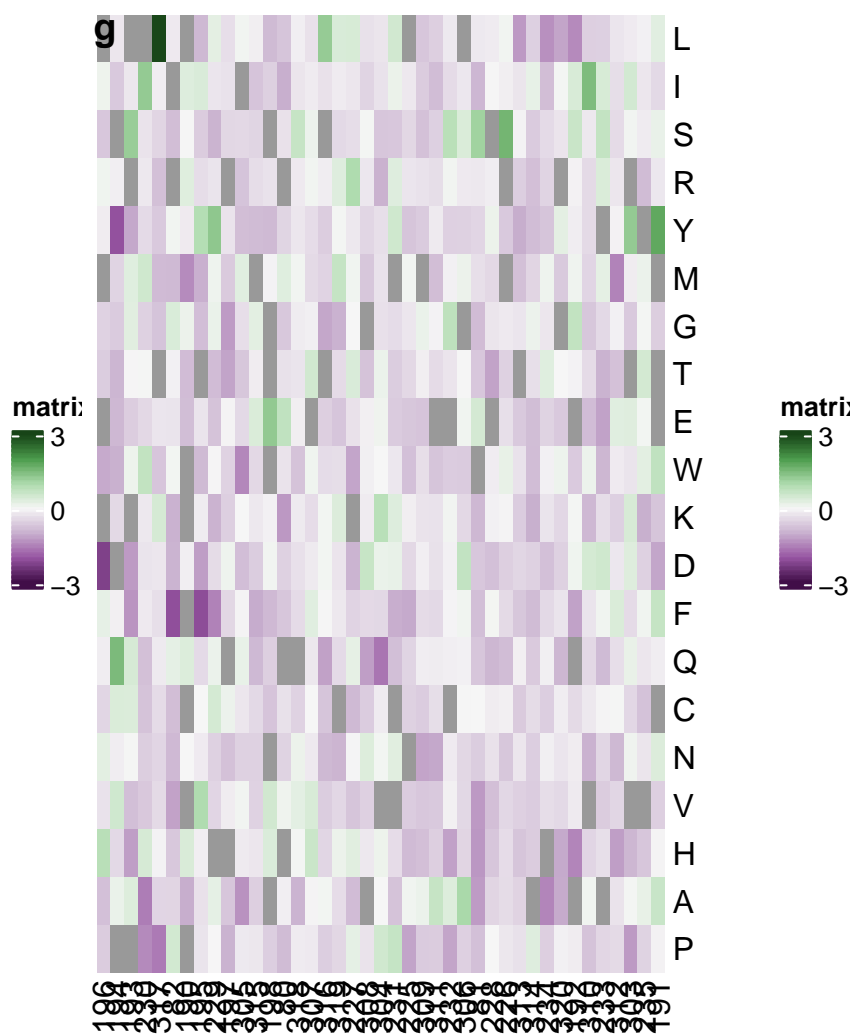

Supplement: data1 [file elife-76903-data1-v2.zip]

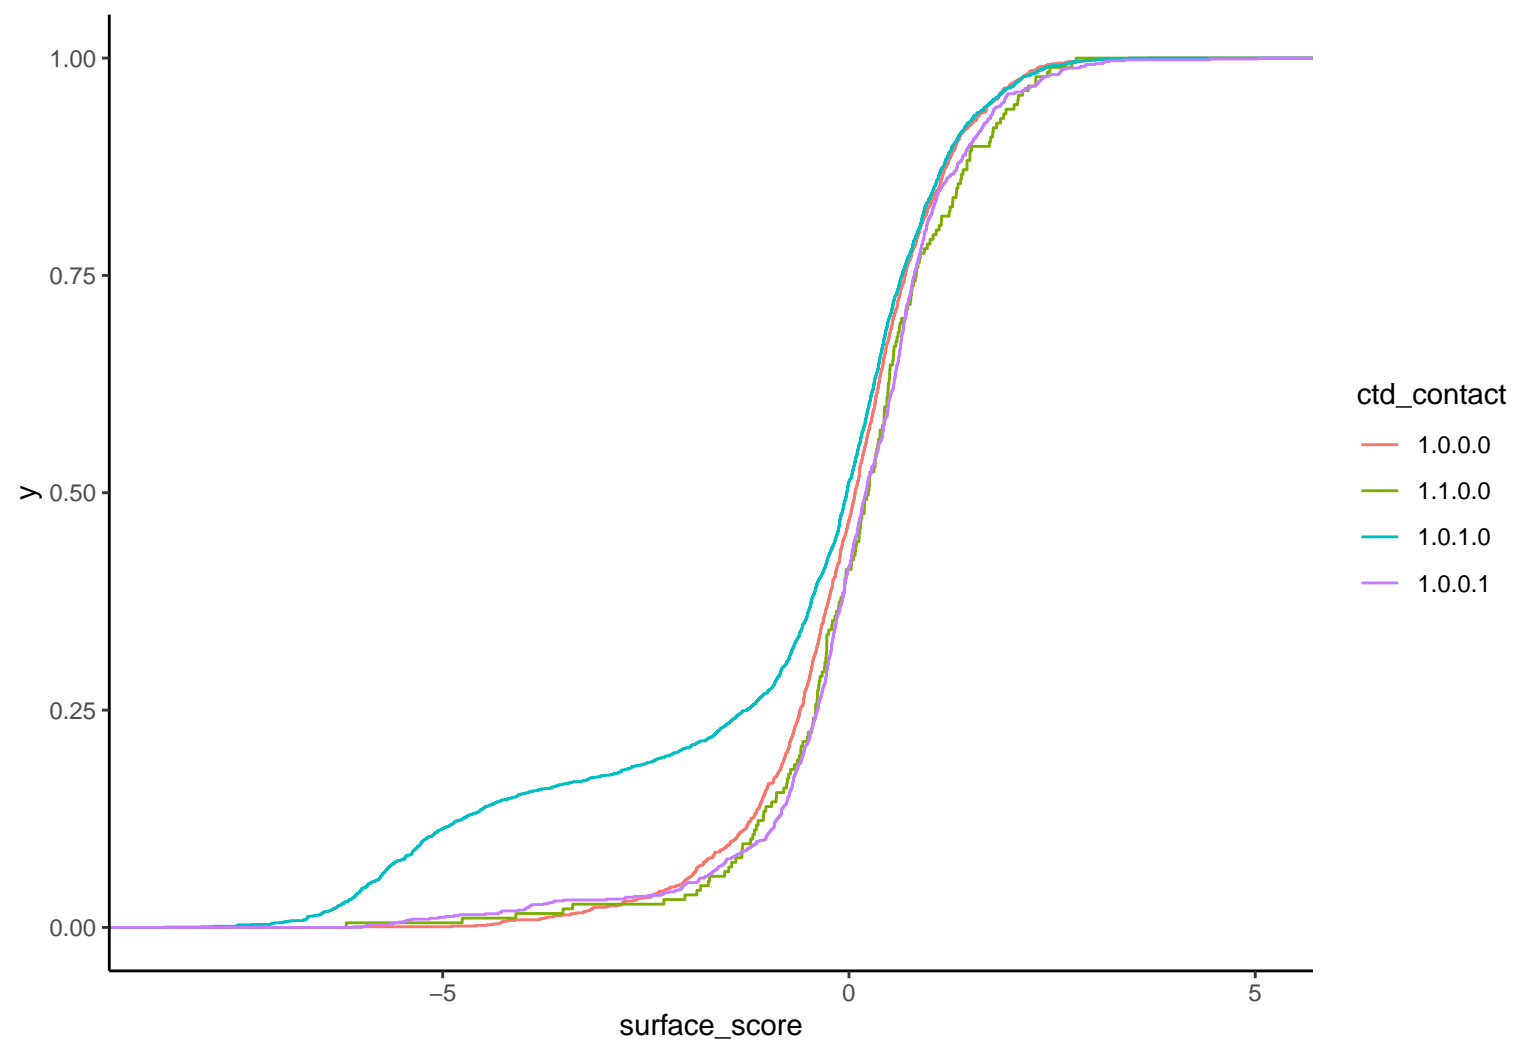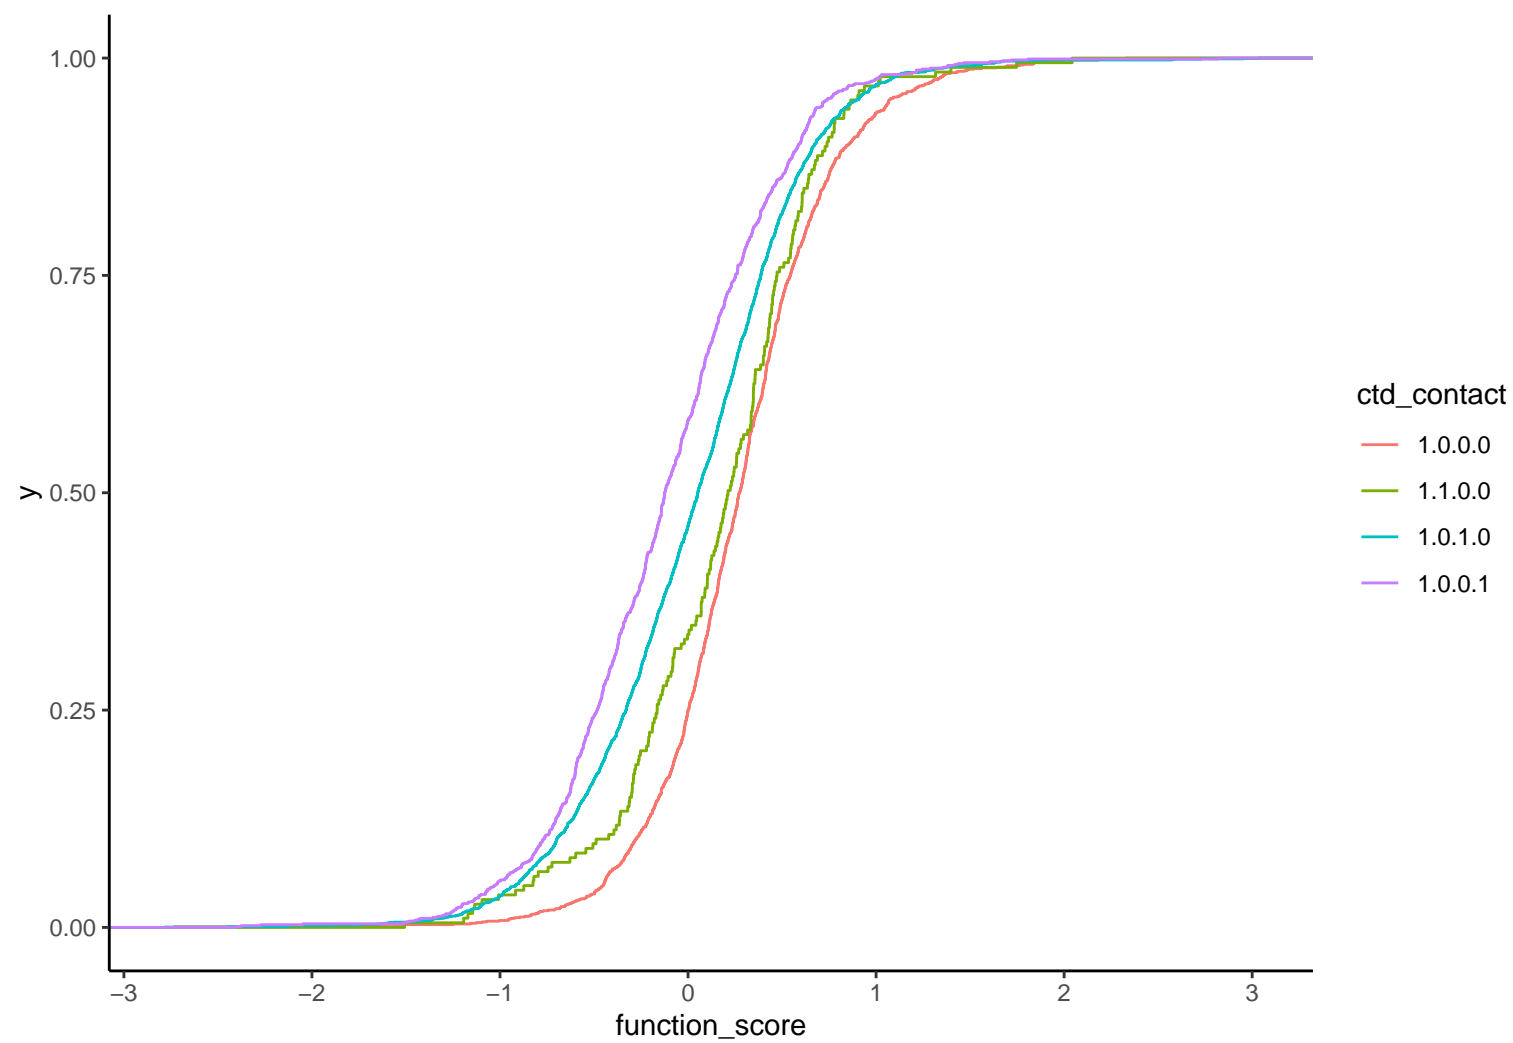

Supplement: data1 [file elife-76903-data1-v2.zip]

Figure 7a-b

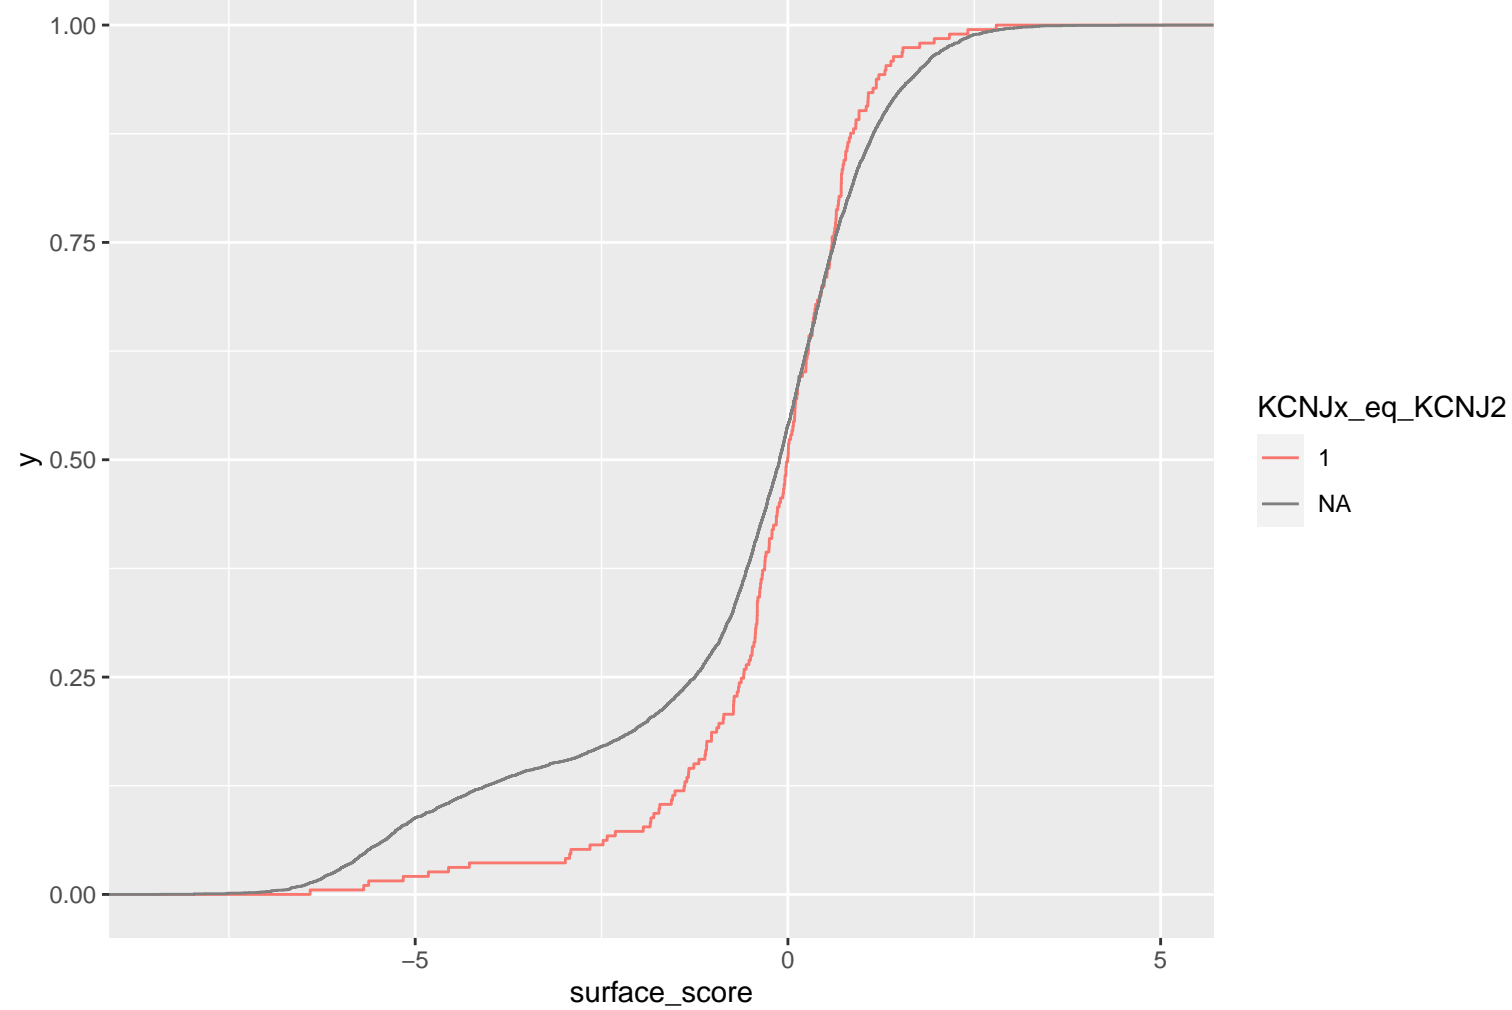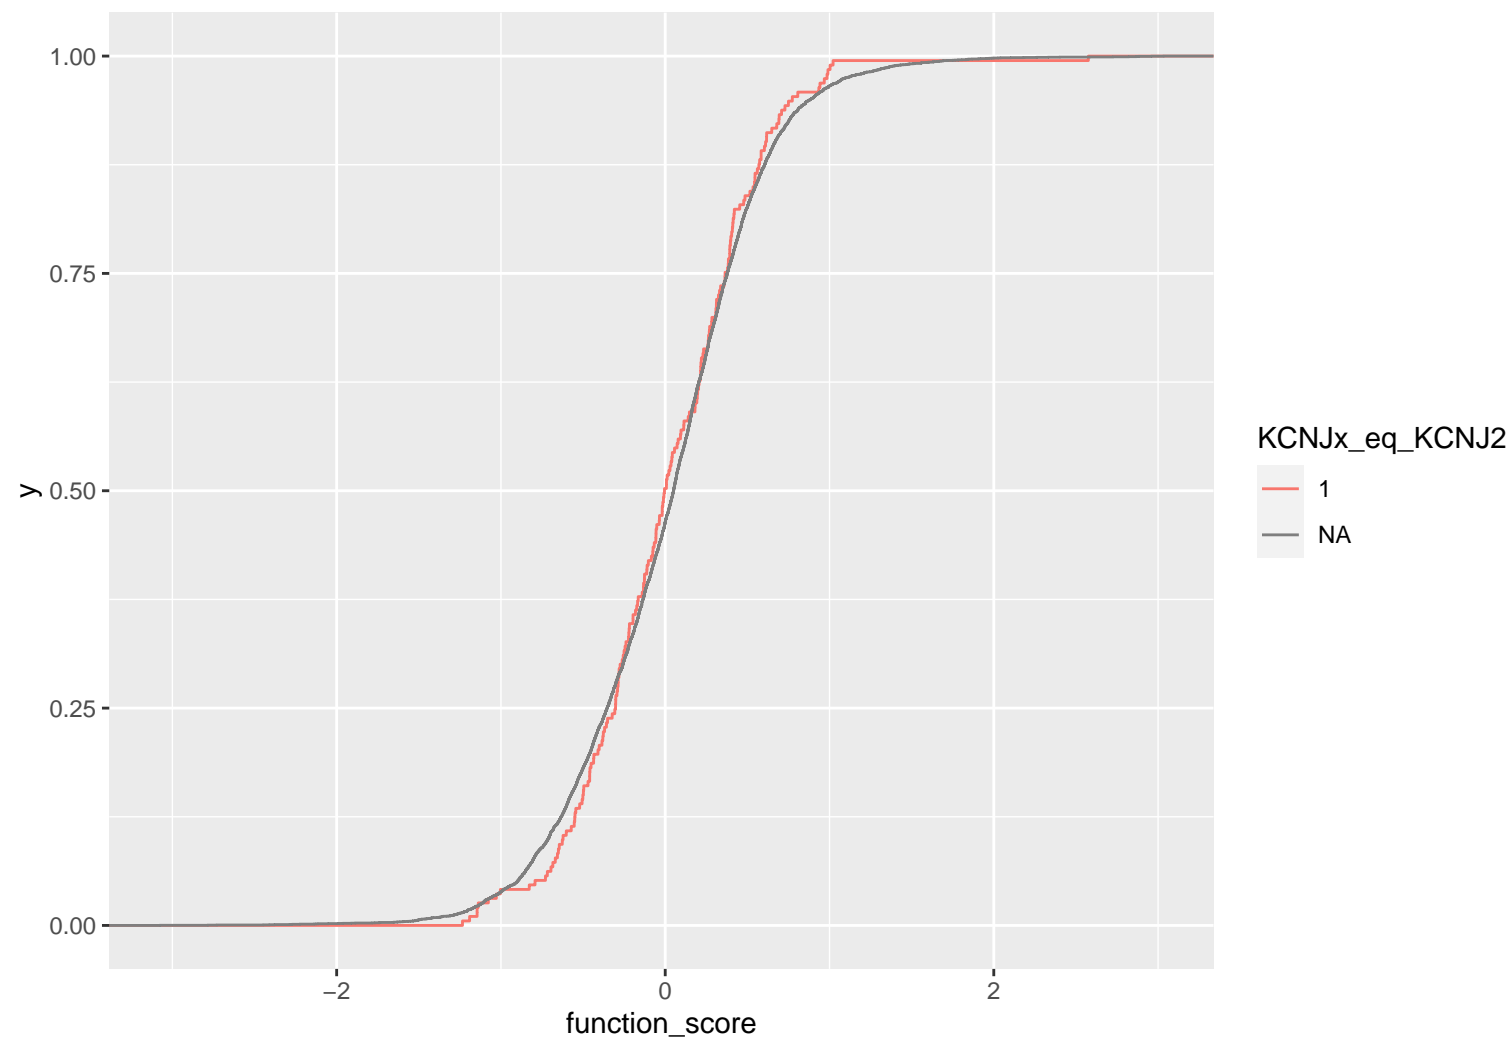

Supplement: data1 [file elife-76903-data1-v2.zip]

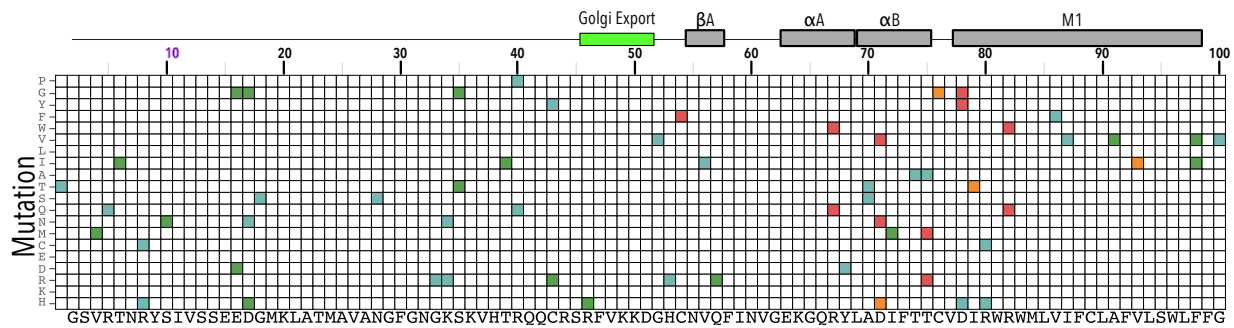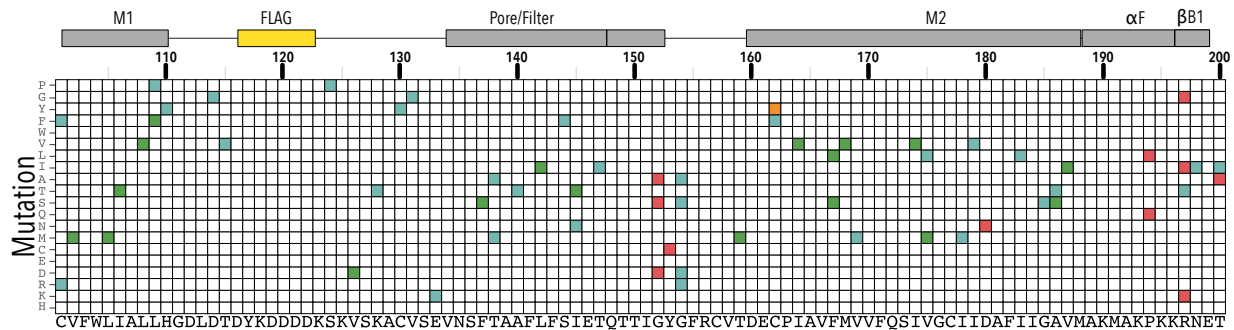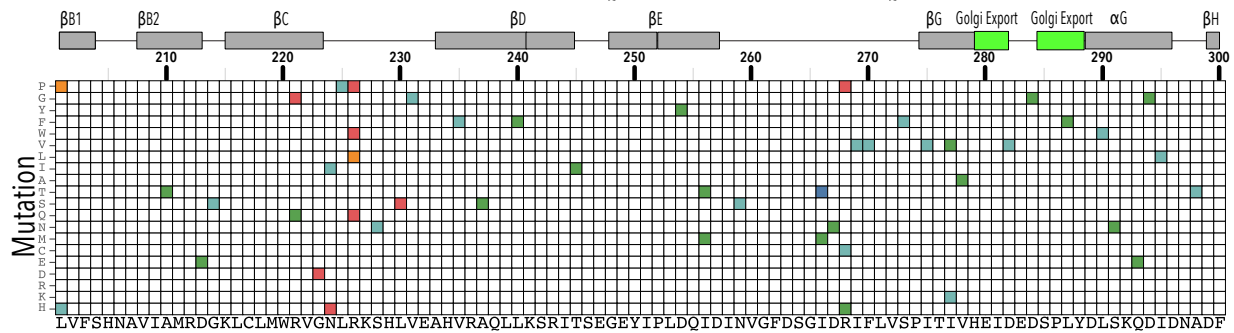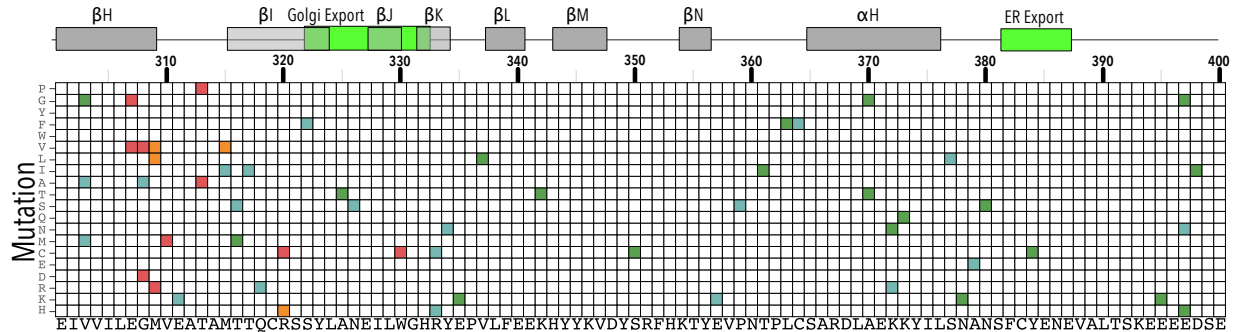

■ Benign 
 ■ Conflicting 
 ■ Pathogenic 
 ■ Uncertain 
 ■ gnomAD

ClinVar

Supplement: supp [file elife_poa_e76903_Figure_1_figure_supplement_1.pdf › elife_poa_e76903_Figure_1_figure_supplement_1.pdf]

A

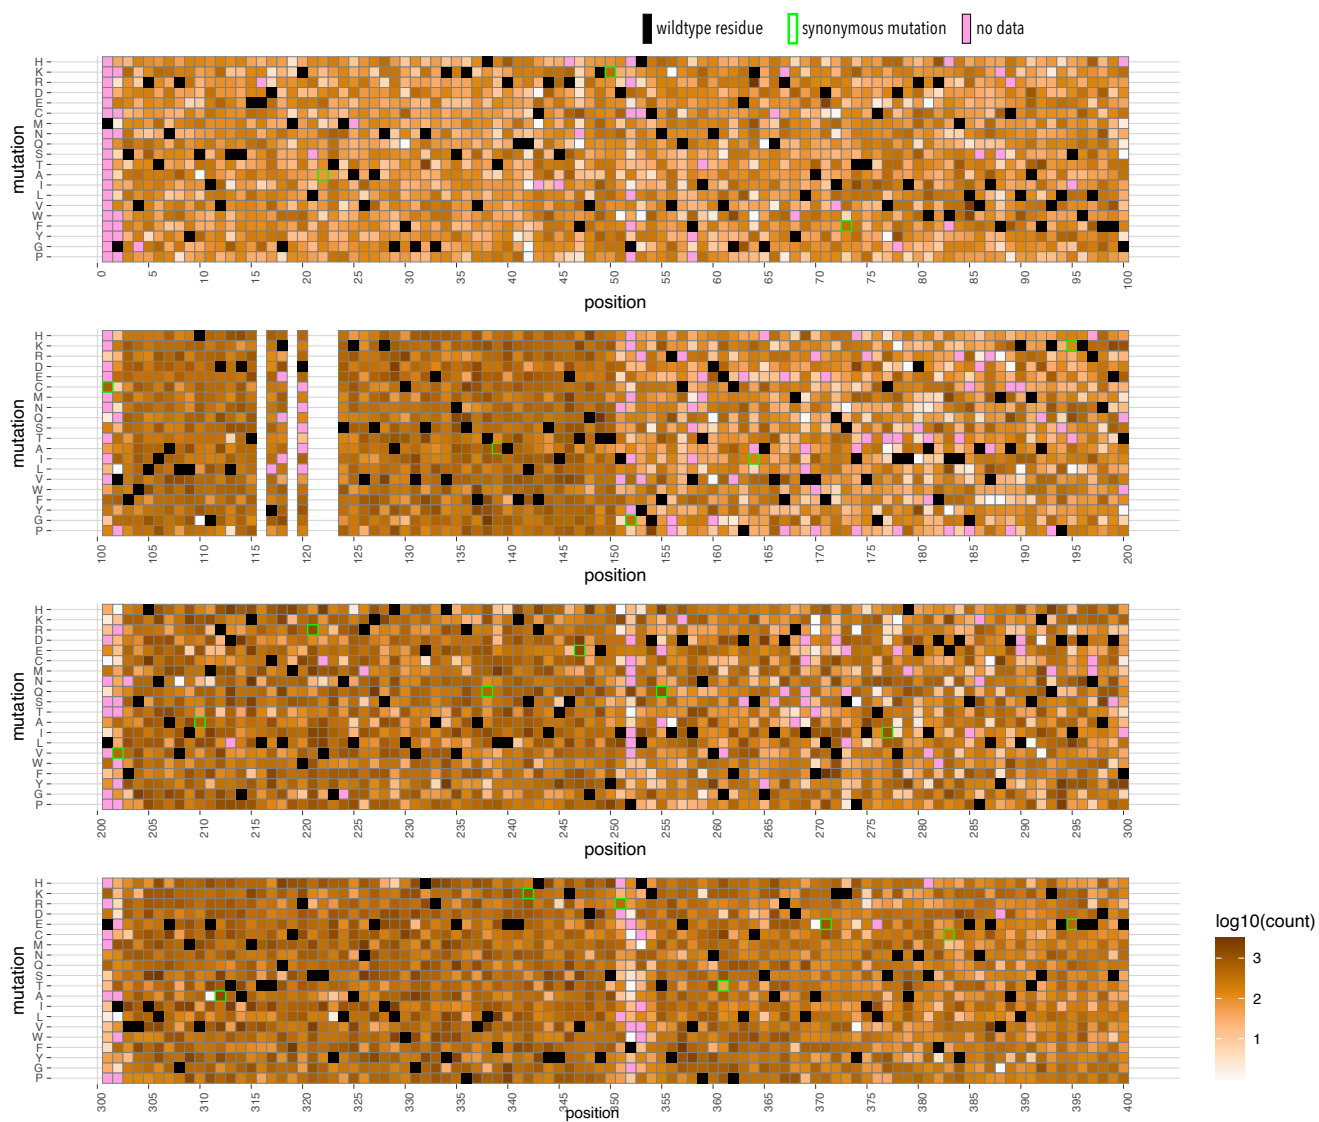

B

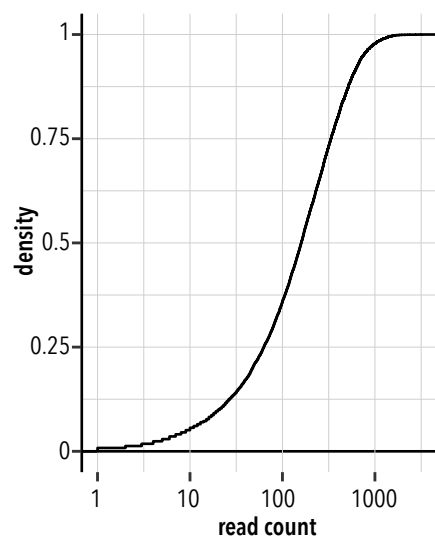

Supplement: supp [file elife_poa_e76903_Figure_1_figure_supplement_2.pdf › elife_poa_e76903_Figure_1_figure_supplement_2.pdf]

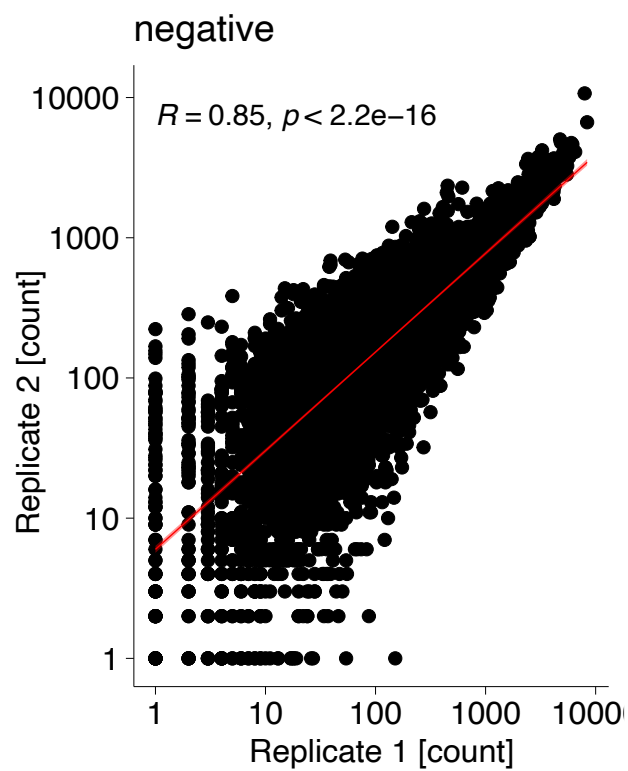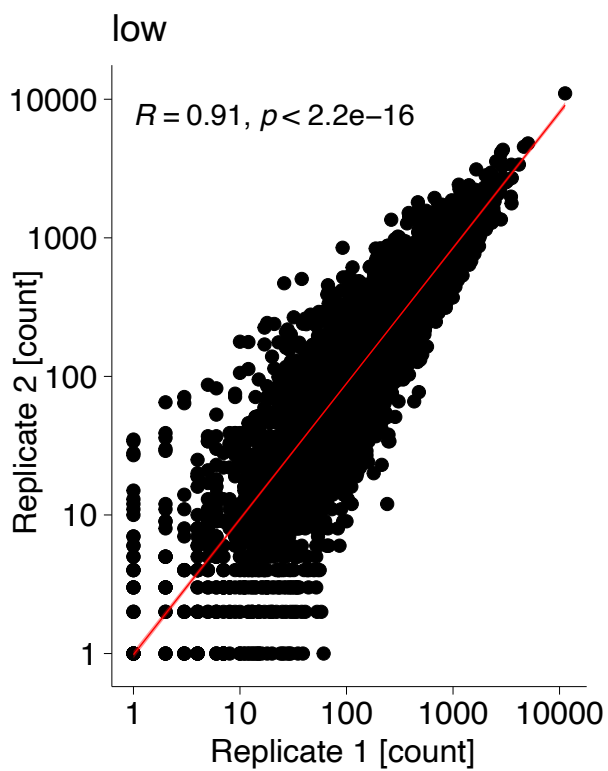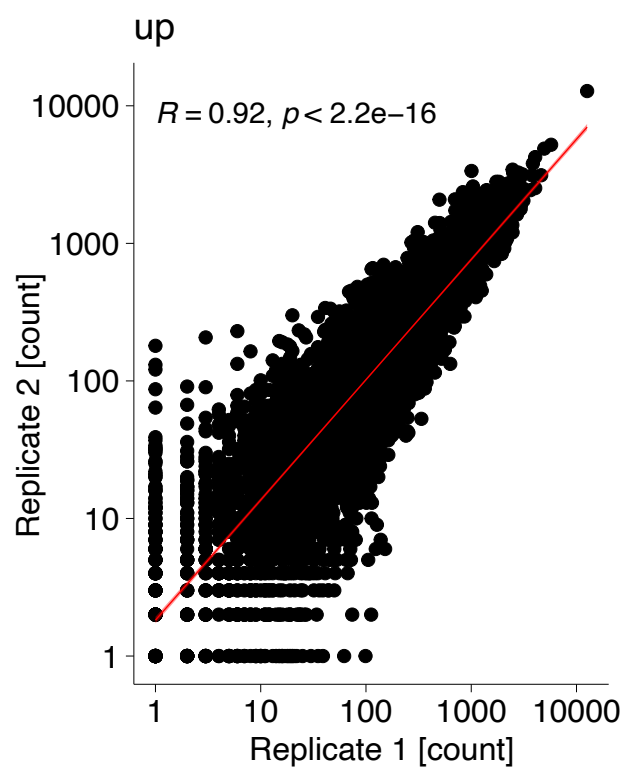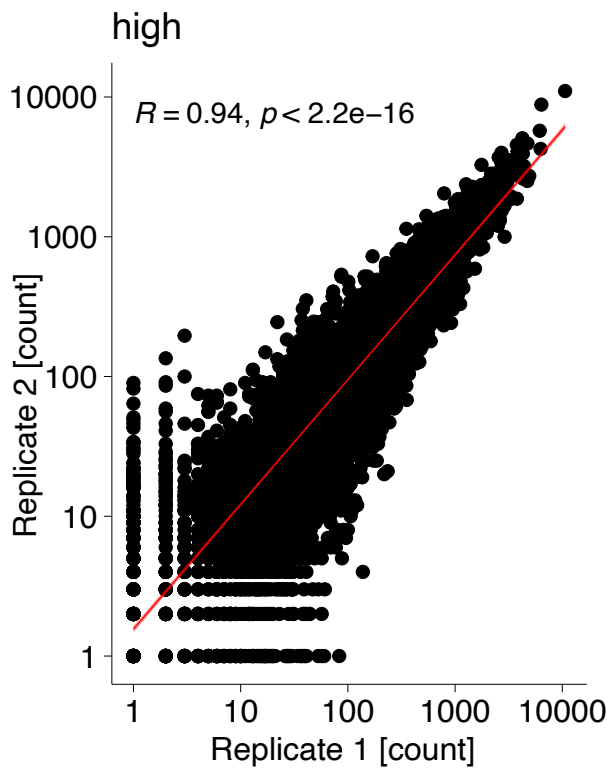

Supplement: supp [file elife_poa_e76903_Figure_2_figure_supplement_2.pdf › elife_poa_e76903_Figure_2_figure_supplement_2.pdf]

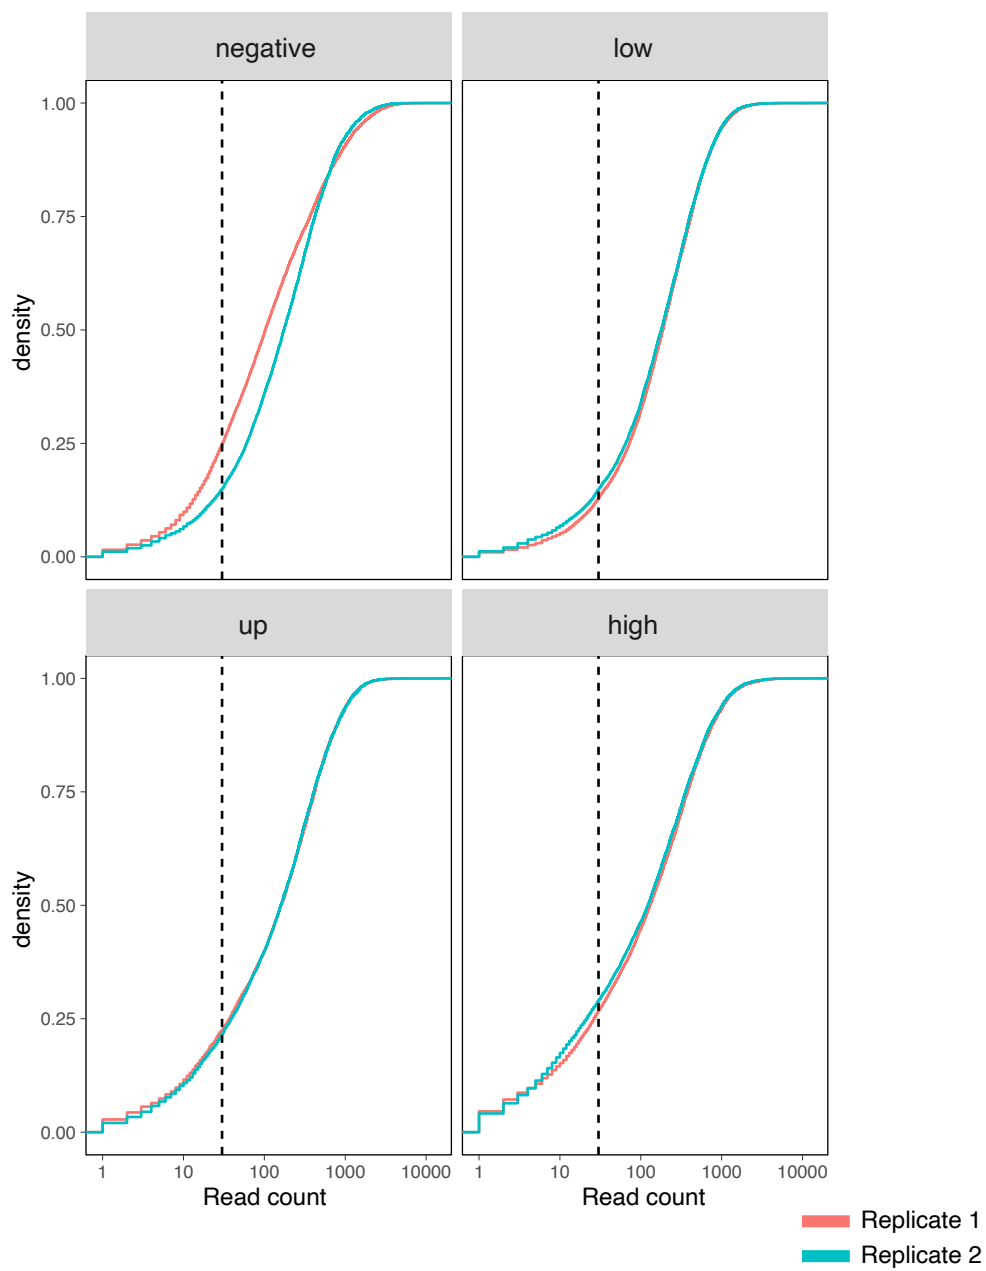

Supplement: supp [file elife_poa_e76903_Figure_2_figure_supplement_3.pdf › elife_poa_e76903_Figure_2_figure_supplement_3.pdf]

A

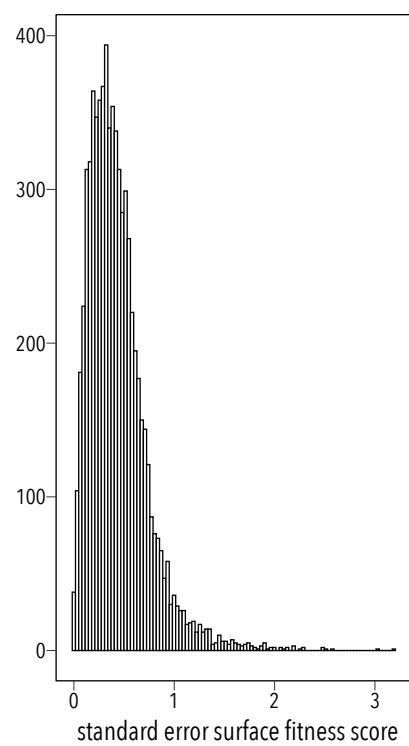

B

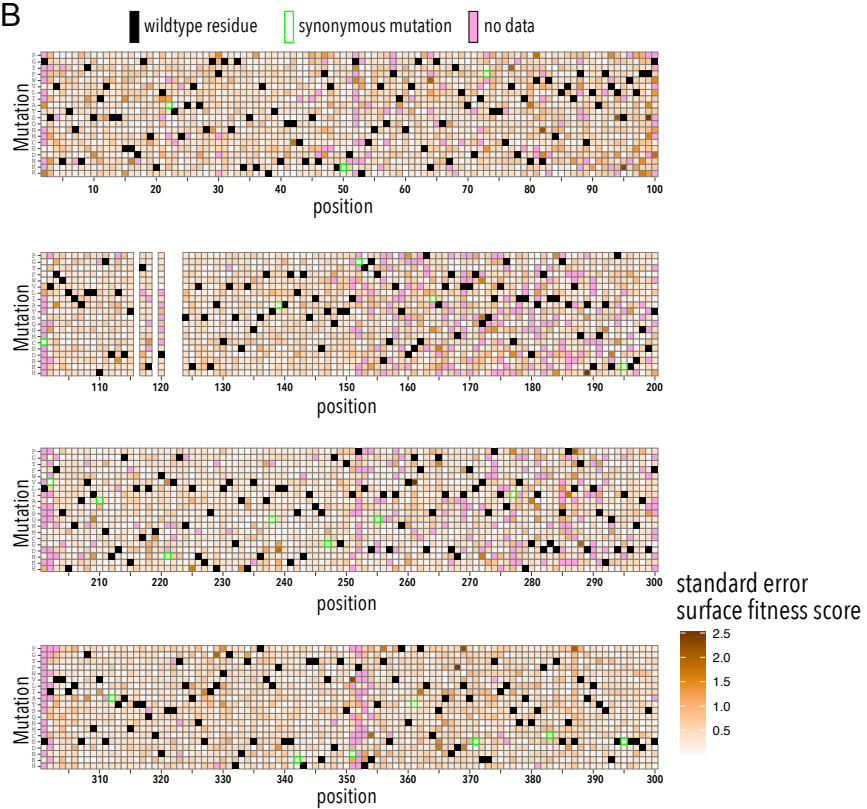

Supplement: supp [file elife_poa_e76903_Figure_2_figure_supplement_5.pdf › elife_poa_e76903_Figure_2_figure_supplement_5.pdf]

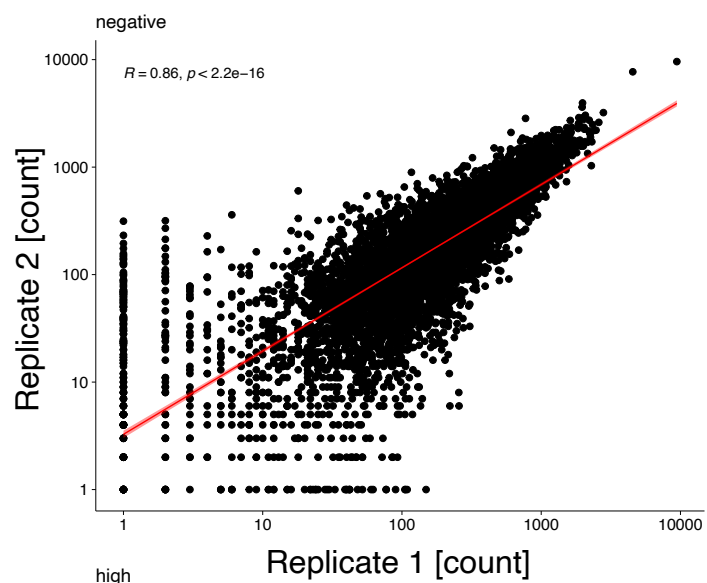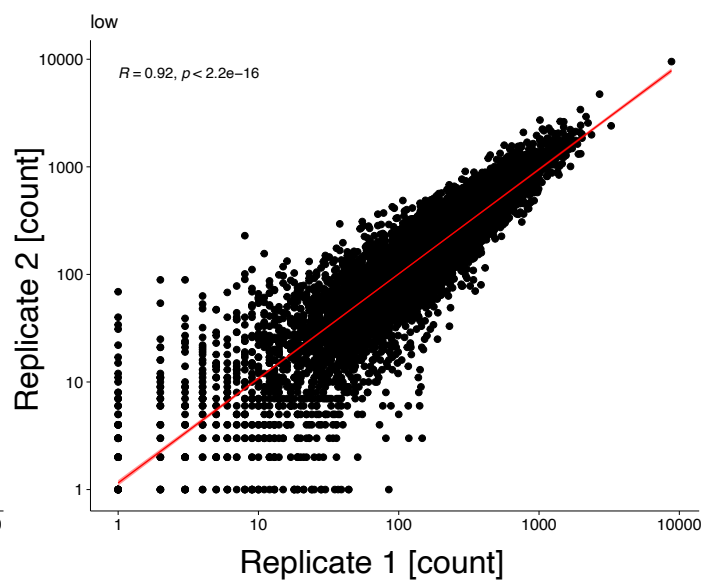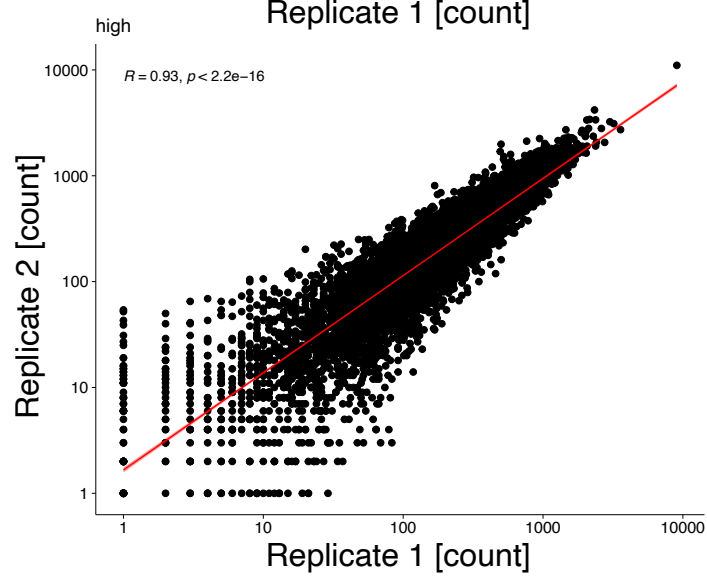

Supplement: supp [file elife_poa_e76903_Figure_4_figure_supplement_1.pdf › elife_poa_e76903_Figure_4_figure_supplement_1.pdf]

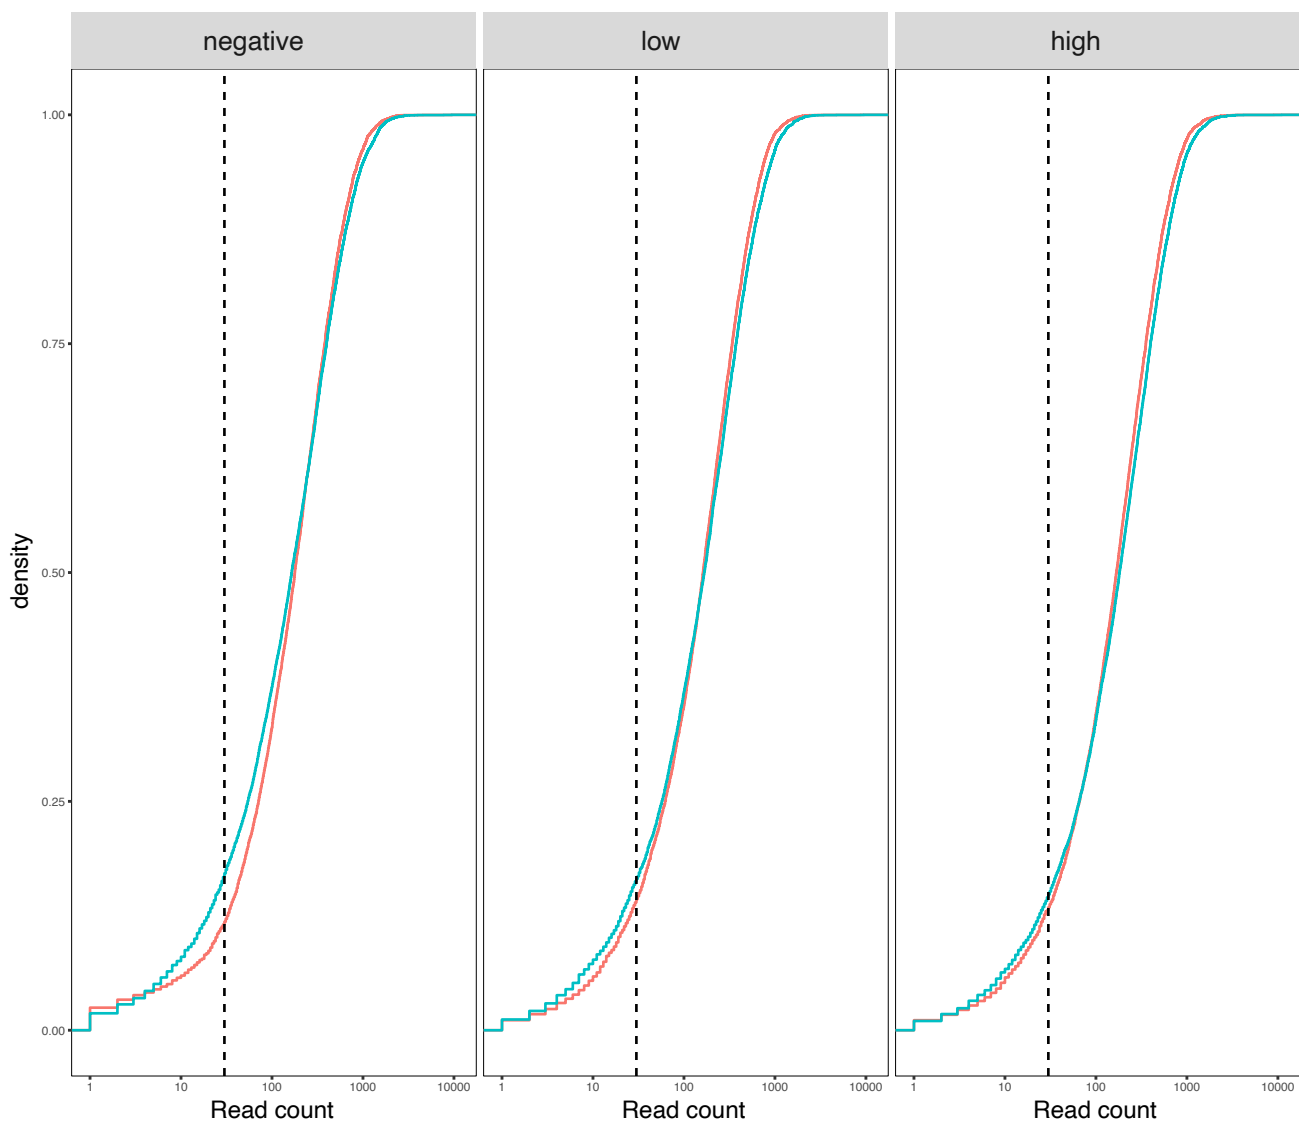

Replicate 1  
Replicate 2

Supplement: supp [file elife_poa_e76903_Figure_4_figure_supplement_2.pdf › elife_poa_e76903_Figure_4_figure_supplement_2.pdf]

A

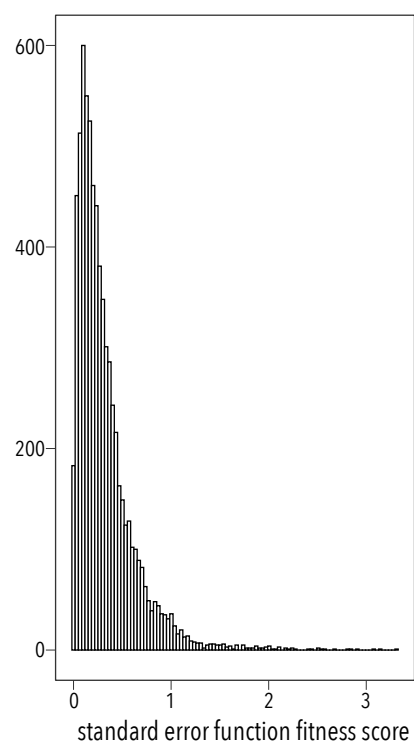

B

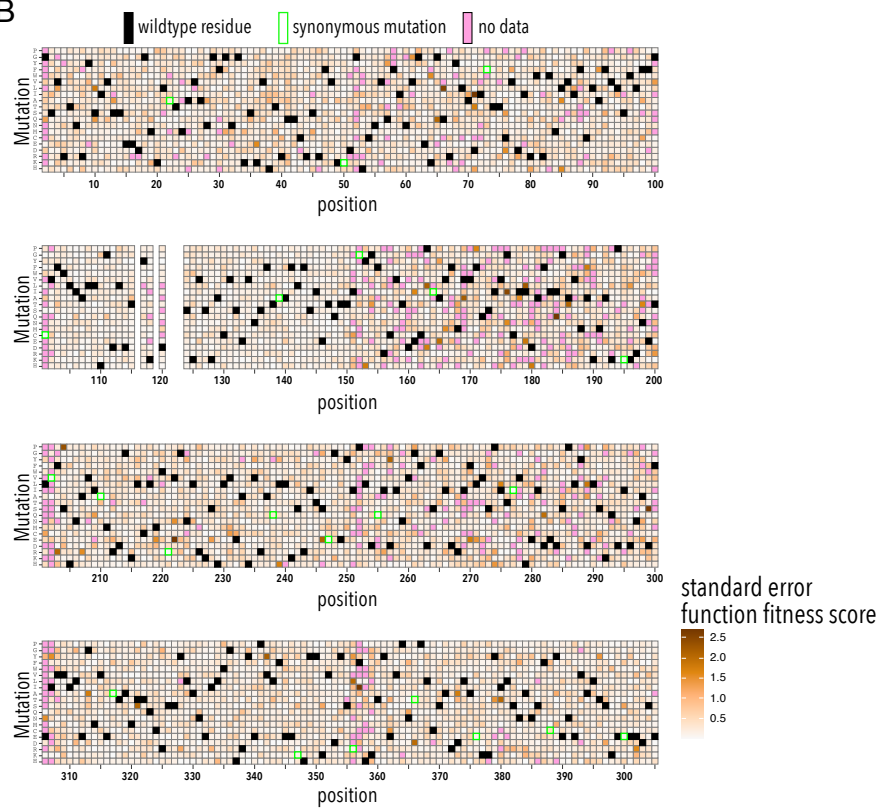

Supplement: supp [file elife_poa_e76903_Figure_4_figure_supplement_4.pdf › elife_poa_e76903_Figure_4_figure_supplement_4.pdf]

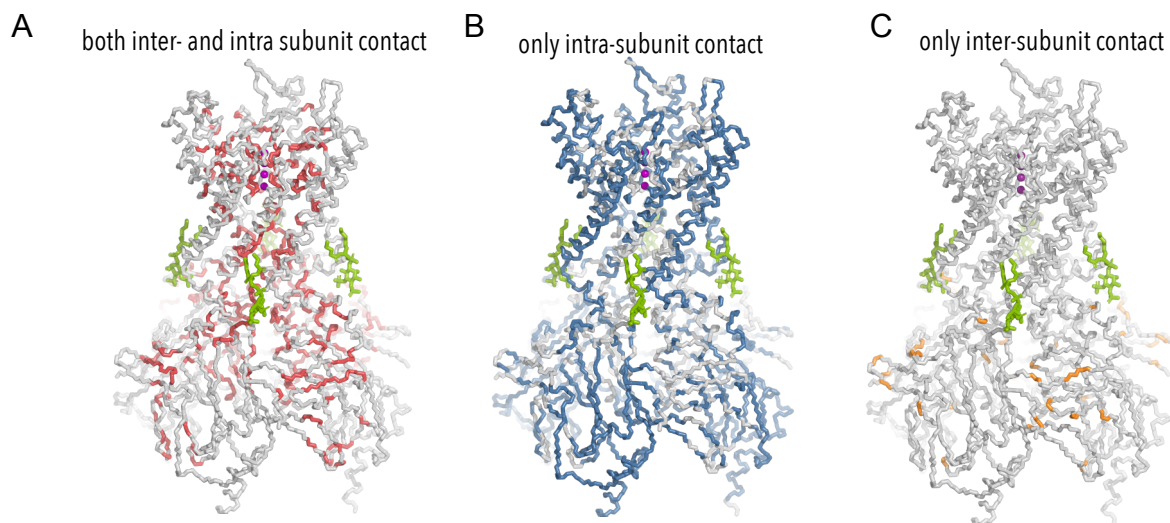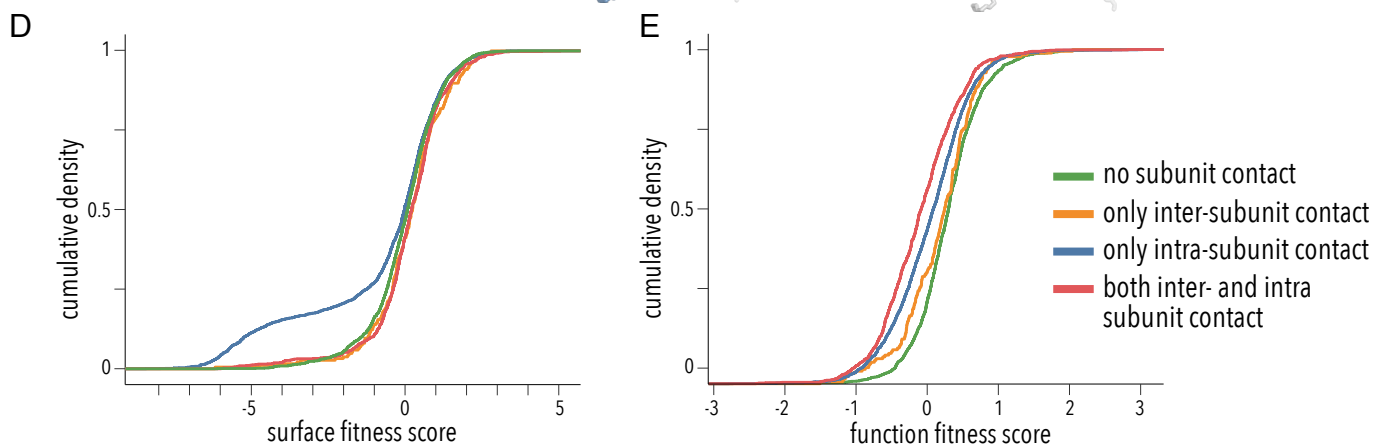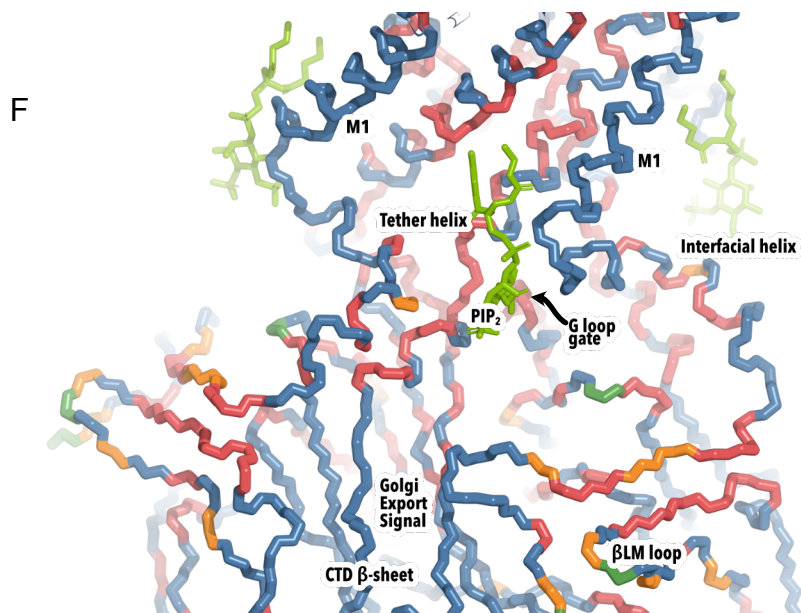

Supplement: supp [file elife_poa_e76903_Figure_5_figure_supplement_1.pdf › elife_poa_e76903_Figure_5_figure_supplement_1.pdf]
